# Supplementary material for: Genetically predicted 91 circulating inflammatory proteins in relation to risk of urological malignancies: a Mendelian randomization study
Source: publisher site journal article supplement (doi:10.18632/aging.205934), 2024-06-13
Supplement: Supplementary file [file aging-v16-205934-supplementary-material-SD1.pdf]

## SUPPLEMENTARY FIGURES

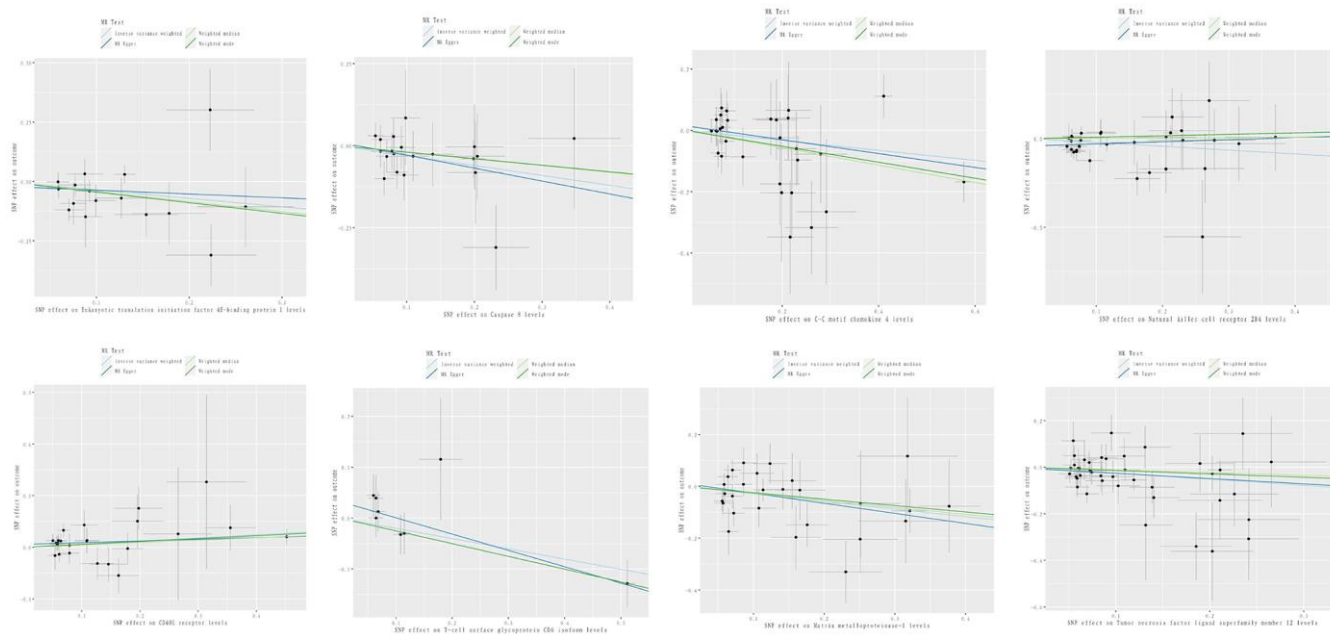

Supplementary Figure 1. The scatter plots for the MR plasma proteins-to-KCa.

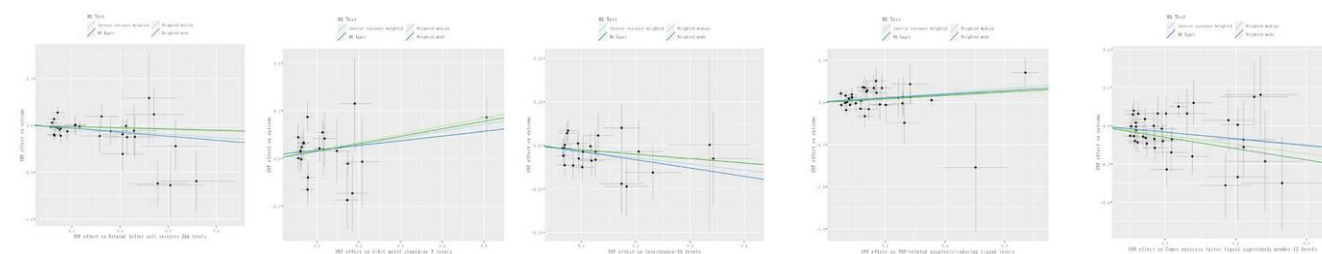

Supplementary Figure 2. The scatter plots for the MR plasma proteins-to-BCa.

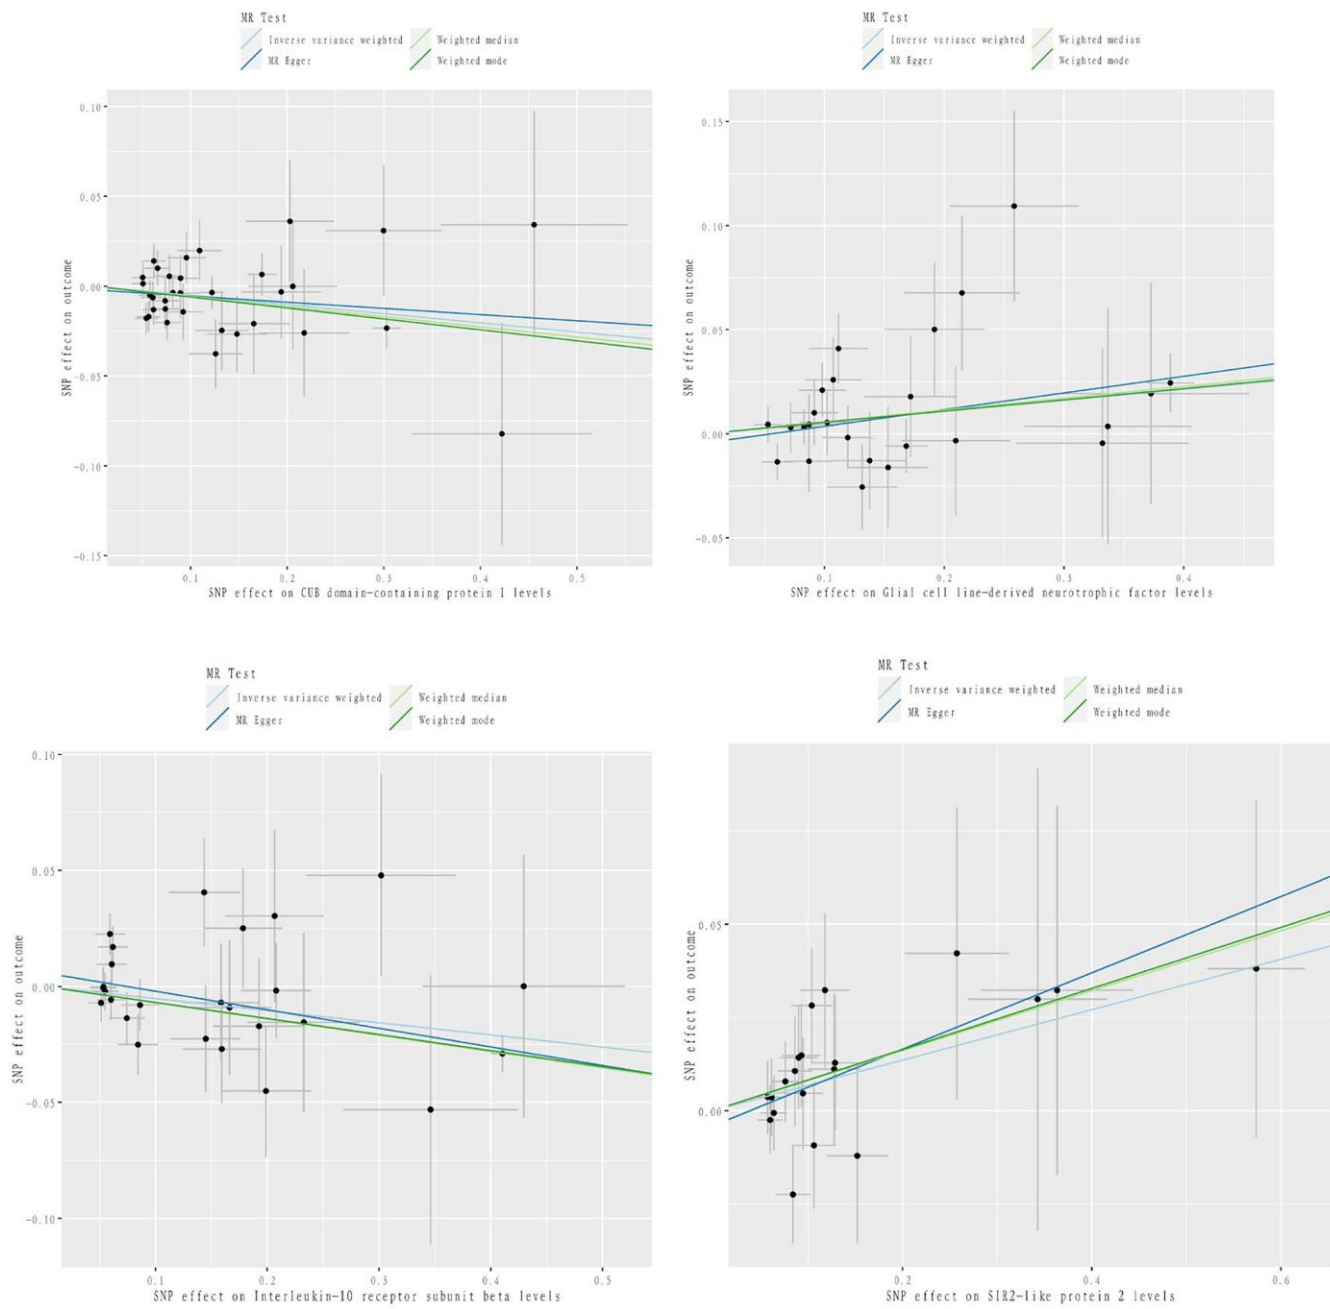

Supplementary Figure 3. The scatter plots for the MR plasma proteins-to-PCa.

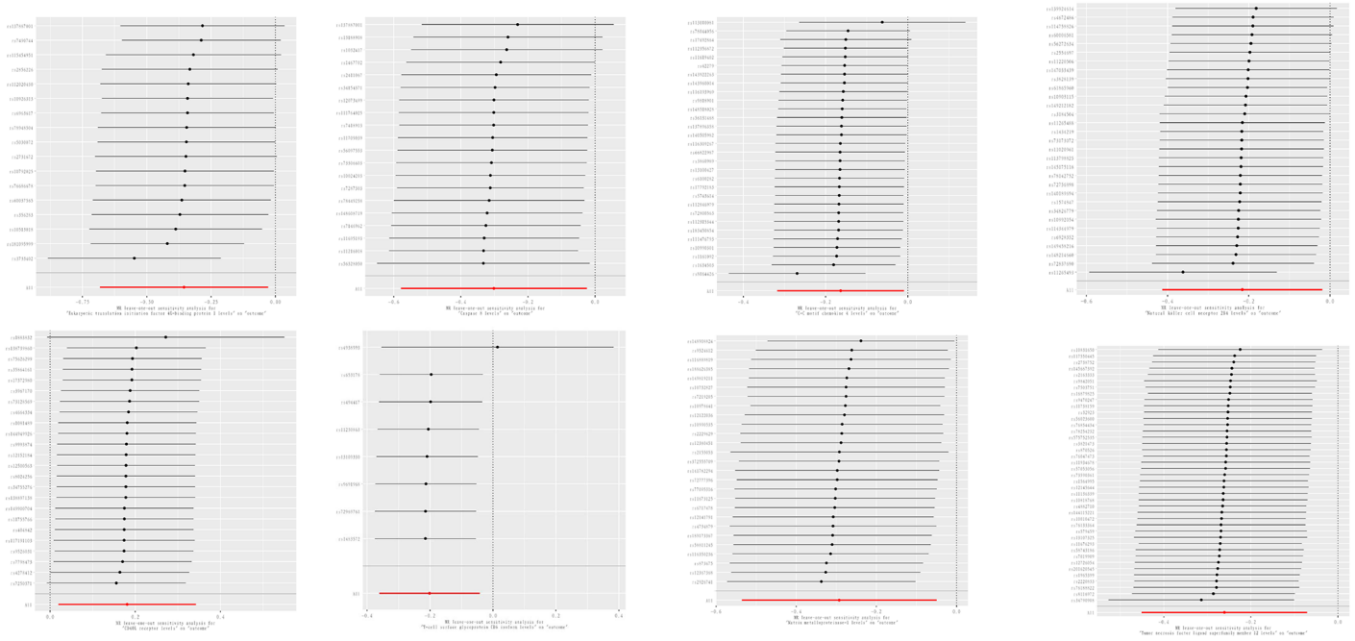

**Supplementary Figure 4. The leave-one-out sensitivity analysis between KCa and circulating inflammatory proteins.**

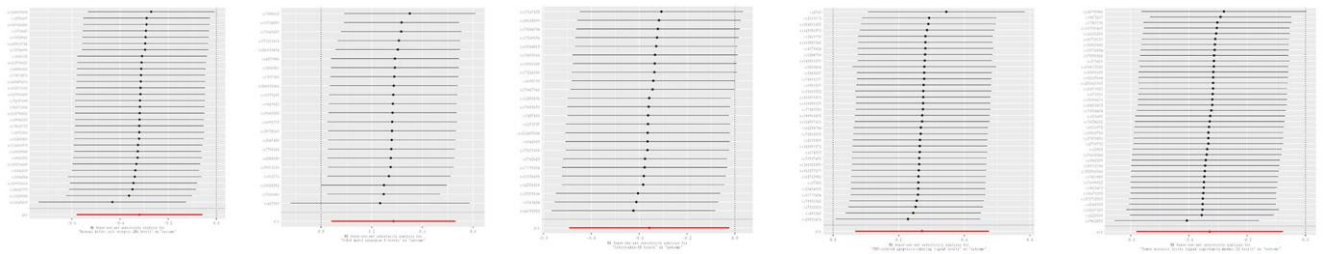

**Supplementary Figure 5. The leave-one-out sensitivity analysis between BCa and circulating inflammatory proteins.**

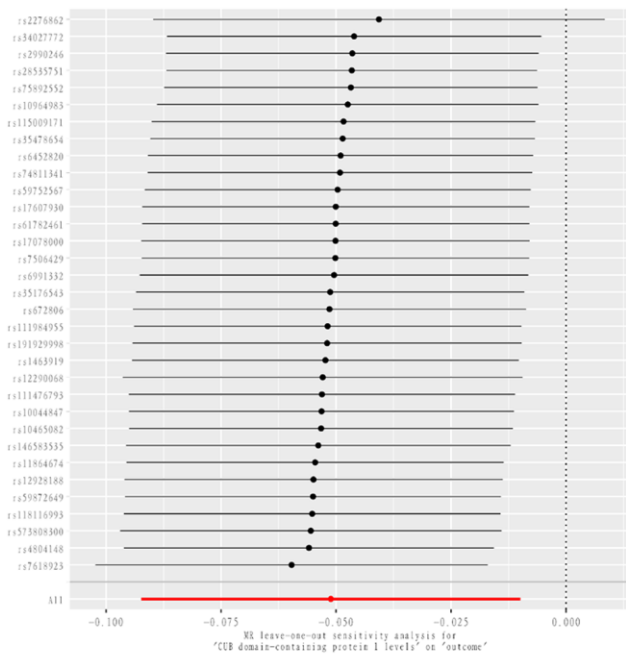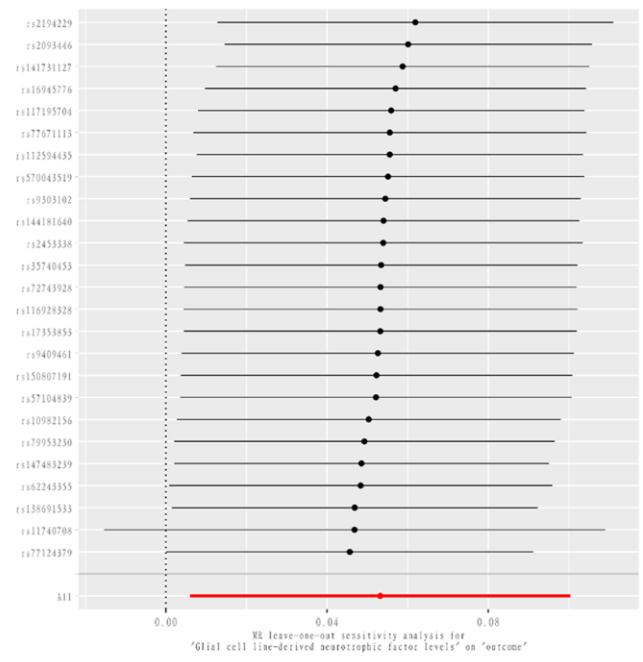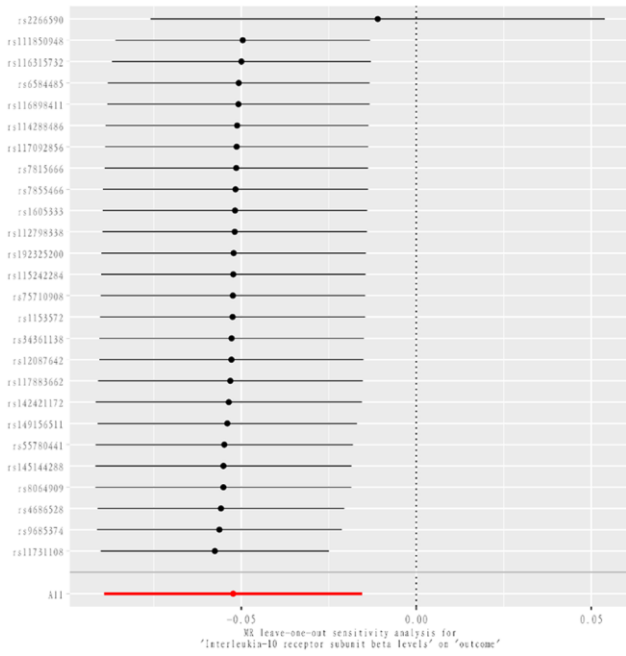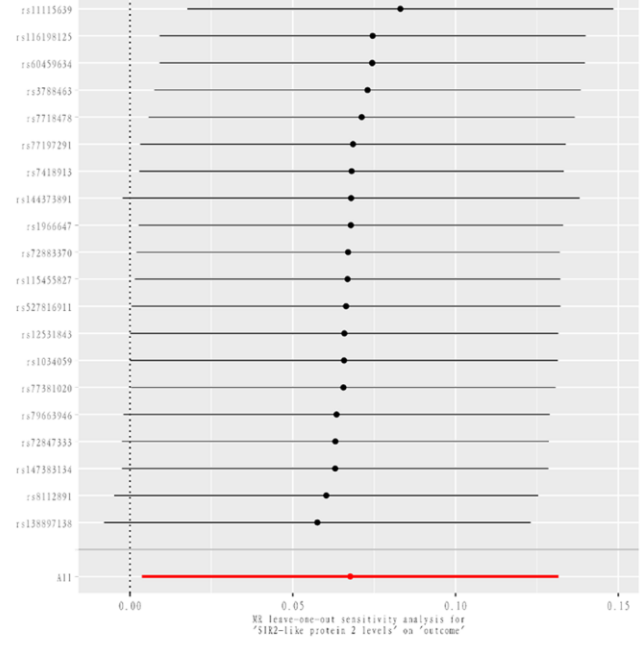

Supplementary Figure 6. The leave-one-out sensitivity analysis between PCa and circulating inflammatory proteins.
