# Supplementary material for: Genetically predicted 91 circulating inflammatory proteins in relation to risk of urological malignancies: a Mendelian randomization study
Source: Aging (Albany NY). 2024 Jun 13;16(12):10366–79. doi: 10.18632/aging.205934 (PMC11236305; doi:10.18632/aging.205934)
Supplement: Supplementary Table 1 [file aging-16-205934-s002.xlsx]

## Sheet: 肾癌SNP
Supplementary Table 1. Detailed information of genetic instruments of 91 plasma proteins for effect on kidney cancer.
SNP	effect_allele.exposure	other_allele.exposure	effect_allele.outcome	other_allele.outcome	beta.exposure	beta.outcome	eaf.exposure	eaf.outcome	id.outcome	pval.outcome	se.outcome	id.exposure	chr.exposure	pos.exposure	se.exposure	pval.exposure	var_id	samplesize.exposure	exposure	rsq.exposure	R2	F	FMean	F_pow_beta_se
rs10513018	A	G	A	G	-0.0875	-0.0322133	0.8986	0.91513	kidney cancer	0.606	0.0624541	GCST90274758	3	136674468	0.0197	8.93e-06	3_136674468_A_G	14288	Eukaryotic translation initiation factor 4E-binding protein 1 levels	0.00137903	0.00139525	19.9603	41.8887	19.728
rs10792025	T	C	T	C	-0.0593	0.025523	0.3383	0.3528	kidney cancer	0.527	0.0403466	GCST90274758	11	68921211	0.0124	1.73e-06	11_68921211_T_C	14727	Eukaryotic translation initiation factor 4E-binding protein 1 levels	0.00155073	0.00157435	23.2189	41.8887	22.87
rs10926313	A	G	A	G	-0.0884	0.148506	0.8334	0.8333	kidney cancer	0.2496	0.128988	GCST90274758	1	240804510	0.0175	4.39e-07	1_240804510_A_G	14288	Eukaryotic translation initiation factor 4E-binding protein 1 levels	0.00178297	0.00217002	31.0683	41.8887	25.5169
rs112020430	T	C	T	C	0.1784	-0.134356	0.0251	0.02658	kidney cancer	0.307	0.131523	GCST90274758	4	117584424	0.0403	9.56e-06	4_117584424_T_C	14735	Eukaryotic translation initiation factor 4E-binding protein 1 levels	0.00132835	0.00155759	22.9838	41.8887	19.5965
rs115454951	A	C	A	C	-0.1537	0.139492	0.0384	0.03374	kidney cancer	0.125	0.0909263	GCST90274758	1	108736338	0.0344	7.89e-06	1_108736338_A_C	11982	Eukaryotic translation initiation factor 4E-binding protein 1 levels	0.00166361	0.00174463	20.9372	41.8887	19.9632
rs137887001	C	G	C	G	0.2235	-0.310064	0.9827	0.98364	kidney cancer	0.01657	0.129403	GCST90274758	20	44566861	0.0486	4.25e-06	20_44566861_C_G	14288	Eukaryotic translation initiation factor 4E-binding protein 1 levels	0.00147819	0.00169845	24.3053	41.8887	21.1486
rs181095999	T	C	T	C	-0.2226	-0.301363	0.0227	0.02965	kidney cancer	0.0796	0.171912	GCST90274758	12	23923166	0.0474	2.65e-06	12_23923166_T_C	14736	Eukaryotic translation initiation factor 4E-binding protein 1 levels	0.0014946	0.00219854	32.4646	41.8887	22.0543
rs2731672	T	C	T	C	0.0926	-0.0400931	0.2679	0.226	kidney cancer	0.3787	0.0455451	GCST90274758	5	176842474	0.0152	1.11e-09	5_176842474_T_C	11783	Eukaryotic translation initiation factor 4E-binding protein 1 levels	0.00314041	0.00336353	39.7595	41.8887	37.1137
rs2856226	T	C	T	C	-0.0995	0.0806679	0.8975	0.91616	kidney cancer	0.2339	0.0677669	GCST90274758	17	15470414	0.0214	3.33e-06	17_15470414_T_C	12404	Eukaryotic translation initiation factor 4E-binding protein 1 levels	0.00174008	0.00182152	22.6317	41.8887	21.6182
rs356283	T	G	T	G	0.0588	-0.00150113	0.6475	0.6155	kidney cancer	0.9706	0.0407297	GCST90274758	1	80975190	0.0123	1.75e-06	1_80975190_T_G	14730	Eukaryotic translation initiation factor 4E-binding protein 1 levels	0.00154927	0.00157828	23.2816	41.8887	22.8531
rs3733402	A	G	A	G	-0.1305	-0.0300441	0.5102	0.5266	kidney cancer	0.4373	0.0386787	GCST90274758	4	187158034	0.0116	2.32e-29	4_187158034_A_G	14736	Eukaryotic translation initiation factor 4E-binding protein 1 levels	0.00851667	0.00851158	126.486	41.8887	126.562
rs5030072	T	C	T	C	0.0594	-0.0315939	0.5711	0.5542	kidney cancer	0.4205	0.03922	GCST90274758	3	186455546	0.0119	5.99e-07	3_186455546_T_C	14716	Eukaryotic translation initiation factor 4E-binding protein 1 levels	0.00169049	0.00172851	25.4773	41.8887	24.916
rs60037565	A	T	A	T	0.0772	-0.0149106	0.8011	0.8057	kidney cancer	0.7683	0.0506132	GCST90274758	17	74618280	0.0172	7.18e-06	17_74618280_A_T	11337	Eukaryotic translation initiation factor 4E-binding protein 1 levels	0.00177413	0.00189927	21.5692	41.8887	20.1455
rs6963617	T	C	T	C	0.0754	-0.0925792	0.2938	0.2945	kidney cancer	0.3015	0.0896024	GCST90274758	7	17594314	0.0142	1.1e-07	7_17594314_T_C	14288	Eukaryotic translation initiation factor 4E-binding protein 1 levels	0.0019697	0.00235913	33.7823	41.8887	28.1946
rs7490744	T	G	T	G	0.0705	-0.119798	0.2217	0.2352	kidney cancer	0.012	0.0476874	GCST90274758	13	84976969	0.0159	9.25e-06	13_84976969_T_G	11783	Eukaryotic translation initiation factor 4E-binding protein 1 levels	0.00166601	0.00171522	20.2418	41.8887	19.66
rs76686678	T	G	T	G	0.2607	-0.10661	0.015	0.02045	kidney cancer	0.5263	0.168243	GCST90274758	2	38198906	0.0521	5.62e-07	2_38198906_T_G	14730	Eukaryotic translation initiation factor 4E-binding protein 1 levels	0.00169717	0.00200835	29.6385	41.8887	25.0384
rs78948504	C	G	C	G	-0.1269	0.0700856	0.9352	0.93763	kidney cancer	0.4023	0.0836822	GCST90274758	8	3936170	0.0281	6.3e-06	8_3936170_C_G	11781	Eukaryotic translation initiation factor 4E-binding protein 1 levels	0.00172843	0.00195179	23.0351	41.8887	20.3944
rs112351694	C	G	C	G	0.8874	0.0479305	0.0514	0.06033	kidney cancer	0.5942	0.0899665	GCST90274759	20	43250424	0.0253	1.62e-269	20_43250424_C_G	14729	Adenosine Deaminase levels	0.0770973	0.0767918	1224.98	41.8887	1230.26
rs62319742	A	G	A	G	-0.1228	-0.230318	0.055	0.05828	kidney cancer	0.01697	0.0964739	GCST90274759	4	124581262	0.0257	1.77e-06	4_124581262_A_G	14730	Adenosine Deaminase levels	0.0015478	0.00156755	23.1231	41.8887	22.8313
rs73617409	A	G	A	G	-0.1313	-0.267428	0.2474	0.2342	kidney cancer	0.3738	0.300691	GCST90274759	20	43300800	0.0164	1.18e-15	20_43300800_A_G	12404	Adenosine Deaminase levels	0.00514175	0.00641983	80.1331	41.8887	64.0976
rs7793526	A	G	A	G	-0.0592	0.0928831	0.3435	0.3701	kidney cancer	0.02043	0.0400642	GCST90274759	7	22805608	0.0122	1.22e-06	7_22805608_A_G	14732	Adenosine Deaminase levels	0.00159598	0.00158065	23.3198	41.8887	23.5464
rs80212763	T	C	T	C	0.9687	-0.0720416	0.0189	0.01534	kidney cancer	0.6435	0.155661	GCST90274759	20	43223930	0.0448	1.1e-103	20_43223930_T_C	14249	Adenosine Deaminase levels	0.0317743	0.0348004	513.677	41.8887	467.544
rs10799609	T	C	T	C	-0.1321	-0.0116321	0.0561	0.06748	kidney cancer	0.8948	0.0879666	GCST90274760	1	20418323	0.0293	6.53e-06	1_20418323_T_C	11778	Artemin levels	0.00172315	0.0018481	21.8035	41.8887	20.3269
rs117212234	T	C	T	C	0.0874	-0.022935	0.8262	0.8333	kidney cancer	0.8484	0.119978	GCST90274760	10	52447591	0.0186	2.62e-06	10_52447591_T_C	11330	Artemin levels	0.00194535	0.00219375	24.9055	41.8887	22.0799
rs118115625	T	C	T	C	0.1703	0.0538228	0.0344	0.0317	kidney cancer	0.6022	0.103259	GCST90274760	12	81724190	0.0362	2.55e-06	12_81724190_T_C	11778	Artemin levels	0.00187585	0.0019267	22.7327	41.8887	22.1316
rs12699544	A	G	A	G	0.0803	0.10984	0.1536	0.1748	kidney cancer	0.03441	0.0519283	GCST90274760	7	13780997	0.0181	9.14e-06	7_13780997_A_G	11777	Artemin levels	0.00166874	0.00167659	19.7751	41.8887	19.6822
rs1329733	A	G	A	G	-0.0674	-0.0726782	0.5323	0.5174	kidney cancer	0.06208	0.0389544	GCST90274760	9	92208227	0.0136	7.2e-07	9_92208227_A_G	11330	Artemin levels	0.00216346	0.0022619	25.6809	41.8887	24.5608
rs13303278	A	C	A	C	-0.0664	-0.0497421	0.5539	0.5787	kidney cancer	0.2676	0.044869	GCST90274760	1	921716	0.0144	4.01e-06	1_921716_A_C	10265	Artemin levels	0.00206746	0.00217886	22.4105	41.8887	21.2623
rs1370215	T	C	T	C	-0.07	-0.0196926	0.7417	0.7393	kidney cancer	0.6653	0.0455208	GCST90274760	18	54688939	0.0153	4.76e-06	18_54688939_T_C	11330	Artemin levels	0.00184441	0.0018775	21.3083	41.8887	20.9321
rs138311590	A	G	A	G	-0.0811	0.0453557	0.84	0.8262	kidney cancer	0.409	0.054933	GCST90274760	4	4424044	0.0176	4.07e-06	4_4424044_A_G	11758	Artemin levels	0.00180291	0.00176795	20.8209	41.8887	21.2332
rs141429639	A	G	A	G	-0.293	0.0630463	0.0147	0.01534	kidney cancer	0.8817	0.423657	GCST90274760	8	53903686	0.0644	5.37e-06	8_53903686_A_G	11330	Artemin levels	0.00182397	0.00248686	28.2414	41.8887	20.6997
rs141625055	A	G	A	G	0.1852	0.0916768	0.0327	0.02454	kidney cancer	0.4681	0.126351	GCST90274760	2	142183922	0.0418	9.4e-06	2_142183922_A_G	11765	Artemin levels	0.00166605	0.00216981	25.5789	41.8887	19.6304
rs142970662	A	G	A	G	0.311	-0.210666	0.0191	0.01943	kidney cancer	0.2984	0.202589	GCST90274760	7	106961661	0.0639	1.13e-06	7_106961661_A_G	9834	Artemin levels	0.00240343	0.00362417	35.7625	41.8887	23.6875
rs148226005	A	G	A	G	0.2112	-0.0354199	0.9758	0.98262	kidney cancer	0.8011	0.140598	GCST90274760	12	130004146	0.0451	2.83e-06	12_130004146_A_G	11765	Artemin levels	0.00186083	0.00210666	24.8329	41.8887	21.9298
rs17340161	A	G	A	G	-0.0873	0.0192142	0.8494	0.8845	kidney cancer	0.7229	0.0541878	GCST90274760	5	103466564	0.0189	3.86e-06	5_103466564_A_G	11330	Artemin levels	0.0018799	0.00194983	22.1308	41.8887	21.3356
rs17491469	A	G	A	G	-0.0897	-0.0020978	0.1327	0.1616	kidney cancer	0.9706	0.0569191	GCST90274760	3	189164574	0.0197	5.28e-06	3_189164574_A_G	11777	Artemin levels	0.00175763	0.00185206	21.8485	41.8887	20.7325
rs3003450	T	G	T	G	0.0632	-0.00160128	0.6627	0.6605	kidney cancer	0.9688	0.0409395	GCST90274760	1	17628383	0.0137	3.97e-06	1_17628383_T_G	11762	Artemin levels	0.00180634	0.00178565	21.0369	41.8887	21.281
rs4561132	A	G	A	G	-0.0716	0.0305292	0.2386	0.2372	kidney cancer	0.5067	0.0459788	GCST90274760	10	97678022	0.0159	6.7e-06	10_97678022_A_G	11329	Artemin levels	0.00178706	0.00186268	21.138	41.8887	20.2783
rs4740350	A	G	A	G	0.0877	0.00904074	0.1326	0.1022	kidney cancer	0.8798	0.0597843	GCST90274760	9	133454106	0.0194	6.17e-06	9_133454106_A_G	11778	Artemin levels	0.00173239	0.00176926	20.8718	41.8887	20.436
rs4993886	A	T	A	T	-0.079	-0.0191828	0.6759	0.6585	kidney cancer	0.6842	0.0471625	GCST90274760	8	3686552	0.0162	1.08e-06	8_3686552_A_T	8371	Artemin levels	0.00283347	0.0027343	22.9461	41.8887	23.7807
rs55885546	A	G	A	G	-0.2047	-0.182821	0.0245	0.03272	kidney cancer	0.2132	0.146866	GCST90274760	8	19493177	0.044	3.28e-06	8_19493177_A_G	11778	Artemin levels	0.00183457	0.0020029	23.6335	41.8887	21.6436
rs569463048	T	G	T	G	-0.2687	-0.286006	0.028	0.03067	kidney cancer	0.0942	0.170888	GCST90274760	11	112934470	0.0588	4.88e-06	11_112934470_T_G	7943	Artemin levels	0.0026228	0.00392997	31.331	41.8887	20.8824
rs59142746	A	G	A	G	-0.1495	0.112273	0.0532	0.0593	kidney cancer	0.1656	0.0809771	GCST90274760	3	93510228	0.0335	8.09e-06	3_93510228_A_G	9453	Artemin levels	0.00210281	0.00225155	21.3275	41.8887	19.9156
rs62277657	A	G	A	G	0.0833	0.0517144	0.1972	0.2147	kidney cancer	0.2676	0.0466481	GCST90274760	3	111720183	0.0166	5.22e-07	3_111720183_A_G	11777	Artemin levels	0.00213395	0.00219702	25.9269	41.8887	25.181
rs6509909	C	G	C	G	-0.0881	-0.05975	0.8122	0.8139	kidney cancer	0.2323	0.0500228	GCST90274760	19	55422034	0.0176	5.57e-07	19_55422034_C_G	11330	Artemin levels	0.00220706	0.00236777	26.8858	41.8887	25.0569
rs74383279	C	G	C	G	-0.1899	0.000499875	0.9634	0.97546	kidney cancer	0.9972	0.142443	GCST90274760	8	112086697	0.0421	6.46e-06	8_112086697_C_G	11761	Artemin levels	0.00172729	0.00254312	29.9808	41.8887	20.3463
rs76672219	A	C	A	C	-0.3226	0.643484	0.9882	0.9816	kidney cancer	0.03531	0.305724	GCST90274760	1	225057589	0.0682	2.24e-06	1_225057589_A_C	11291	Artemin levels	0.00197808	0.00242709	27.4661	41.8887	22.3748
rs77502336	C	G	C	G	0.0679	0.0897059	0.318	0.2986	kidney cancer	0.03043	0.0414452	GCST90274760	11	123394636	0.0141	1.47e-06	11_123394636_C_G	11775	Artemin levels	0.00196589	0.00199978	23.5905	41.8887	23.19
rs79259958	T	C	T	C	-0.3099	0.232437	0.0147	0.01943	kidney cancer	0.1656	0.167645	GCST90274760	4	40380879	0.0697	8.74e-06	4_40380879_T_C	9945	Artemin levels	0.00198425	0.00278201	27.7387	41.8887	19.7687
rs9496445	T	C	T	C	0.0853	0.120587	0.1545	0.1616	kidney cancer	0.01933	0.0515526	GCST90274760	6	143047898	0.0181	2.44e-06	6_143047898_T_C	11768	Artemin levels	0.00188405	0.00190095	22.4091	41.8887	22.2096
rs9684768	C	G	C	G	0.0692	0.00692392	0.626	0.6421	kidney cancer	0.8653	0.0408174	GCST90274760	4	156930775	0.014	7.7e-07	4_156930775_C_G	11330	Artemin levels	0.00215212	0.00224227	25.4575	41.8887	24.4318
rs10860902	C	G	C	G	0.0659	0.0429637	0.7403	0.7382	kidney cancer	0.348	0.0457803	GCST90274761	12	103075047	0.0149	9.74e-06	12_103075047_C_G	11778	Axin-1 levels	0.00165836	0.00166986	19.6972	41.8887	19.5613
rs11202576	A	G	A	G	-0.0767	0.0148886	0.7946	0.8292	kidney cancer	0.7619	0.0491395	GCST90274761	10	89584284	0.0172	8.22e-06	10_89584284_A_G	11345	Axin-1 levels	0.00175003	0.0019203	21.8239	41.8887	19.8854
rs113946880	T	C	T	C	0.1331	-0.0362355	0.0539	0.0593	kidney cancer	0.6615	0.0827591	GCST90274761	11	134706712	0.0293	5.55e-06	11_134706712_T_C	11792	Axin-1 levels	0.00174722	0.00180681	21.3408	41.8887	20.6358
rs115455827	A	G	A	G	0.1447	-0.0777453	0.9489	0.96728	kidney cancer	0.4207	0.0965532	GCST90274761	5	78787853	0.0305	2.09e-06	5_78787853_A_G	11792	Axin-1 levels	0.00190544	0.00203053	23.9886	41.8887	22.508
rs117097664	A	C	A	C	0.2444	-0.10652	0.0197	0.01431	kidney cancer	0.4827	0.151745	GCST90274761	6	151334530	0.0522	2.84e-06	6_151334530_A_C	11345	Axin-1 levels	0.00192884	0.00230705	26.2294	41.8887	21.9211
rs148317708	A	G	A	G	-0.212	-0.00786896	0.0295	0.02761	kidney cancer	0.9444	0.112832	GCST90274761	18	50513818	0.042	4.47e-07	18_50513818_A_G	10919	Axin-1 levels	0.0023284	0.00257347	28.1671	41.8887	25.4785
rs2470622	A	G	A	G	-0.1229	0.0673157	0.9127	0.90286	kidney cancer	0.3384	0.070316	GCST90274761	8	102489704	0.0242	3.8e-07	8_102489704_A_G	11345	Axin-1 levels	0.0022686	0.002407	27.3685	41.8887	25.7913
rs2691530	T	C	T	C	-0.067	-0.0793656	0.5969	0.6299	kidney cancer	0.04448	0.0394944	GCST90274761	7	77960243	0.0133	4.71e-07	7_77960243_T_C	11793	Axin-1 levels	0.00214764	0.0021602	25.5261	41.8887	25.3774
rs2712427	A	G	A	G	0.0626	-0.0228593	0.4935	0.4898	kidney cancer	0.5596	0.0391805	GCST90274761	3	128431622	0.0134	2.99e-06	3_128431622_A_G	11345	Axin-1 levels	0.00192033	0.00195905	22.2651	41.8887	21.8242
rs7171268	T	C	T	C	0.1554	0.00169856	0.9514	0.93558	kidney cancer	0.9865	0.100384	GCST90274761	15	81221771	0.0329	2.32e-06	15_81221771_T_C	11345	Axin-1 levels	0.00196304	0.00223322	25.3881	41.8887	22.3105
rs72984228	A	G	A	G	-0.1557	0.0641009	0.9611	0.97137	kidney cancer	0.5412	0.104912	GCST90274761	11	101331132	0.035	8.64e-06	11_101331132_A_G	11792	Axin-1 levels	0.00167571	0.0018127	21.4105	41.8887	19.7898
rs9962377	T	C	T	C	-0.0843	0.0518197	0.1481	0.1391	kidney cancer	0.3249	0.0526389	GCST90274761	18	70105531	0.0186	5.84e-06	18_70105531_T_C	11793	Axin-1 levels	0.00173909	0.0017932	21.1816	41.8887	20.5414
rs11025264	T	C	T	C	0.1739	-0.128833	0.9748	0.96524	kidney cancer	0.2944	0.122871	GCST90274762	11	19837758	0.0384	5.94e-06	11_19837758_T_C	14743	beta-nerve growth factor levels	0.00138933	0.00148575	21.934	41.8887	20.5086
rs117164089	T	C	T	C	-0.271	0.360253	0.014	0.01431	kidney cancer	0.2414	0.307515	GCST90274762	19	43780396	0.0565	1.61e-06	19_43780396_T_C	13421	beta-nerve growth factor levels	0.0017115	0.00202756	27.2631	41.8887	23.006
rs11778834	T	C	T	C	-0.2284	-0.0564748	0.0226	0.02761	kidney cancer	0.7461	0.17442	GCST90274762	8	62908374	0.0503	5.61e-06	8_62908374_T_C	12841	beta-nerve growth factor levels	0.00160335	0.00230464	29.6576	41.8887	20.6185
rs12188775	T	G	T	G	0.1213	-0.0217345	0.9435	0.9407	kidney cancer	0.8115	0.0911332	GCST90274762	5	132971762	0.0247	9.06e-07	5_132971762_T_G	14737	beta-nerve growth factor levels	0.00163406	0.00156871	23.1512	41.8887	24.1172
rs12259196	A	G	A	G	-0.075	0.0300469	0.1928	0.2117	kidney cancer	0.5312	0.0479848	GCST90274762	10	89839430	0.0148	4.03e-07	10_89839430_A_G	13244	beta-nerve growth factor levels	0.00193555	0.00175082	23.225	41.8887	25.6802
rs12533747	A	G	A	G	0.1389	0.0603872	0.0802	0.0501	kidney cancer	0.5467	0.100192	GCST90274762	7	30944899	0.0276	4.84e-07	7_30944899_A_G	14295	beta-nerve growth factor levels	0.00176886	0.00284644	40.8003	41.8887	25.3272
rs12539643	C	G	C	G	0.1867	0.0758493	0.966	0.94888	kidney cancer	0.5264	0.119728	GCST90274762	7	151019021	0.0408	4.74e-06	7_151019021_C_G	11344	beta-nerve growth factor levels	0.0018428	0.00228968	26.0291	41.8887	20.9396
rs13058191	C	G	C	G	-0.2164	0.0184695	0.0256	0.0184	kidney cancer	0.911	0.165235	GCST90274762	22	49775973	0.0467	3.59e-06	22_49775973_C_G	14295	beta-nerve growth factor levels	0.00150005	0.00233626	33.4704	41.8887	21.4724
rs140072192	A	G	A	G	0.2773	-0.247251	0.0196	0.0184	kidney cancer	0.1835	0.185895	GCST90274762	16	3327943	0.0602	4.1e-06	16_3327943_A_G	11925	beta-nerve growth factor levels	0.00177643	0.00295522	35.3395	41.8887	21.2181
rs140882208	T	C	T	C	-0.1722	0.0474061	0.0258	0.02761	kidney cancer	0.6802	0.11501	GCST90274762	17	47365286	0.0388	9.07e-06	17_47365286_T_C	14731	beta-nerve growth factor levels	0.00133552	0.00149061	21.988	41.8887	19.6971
rs148834134	T	C	T	C	0.2541	-0.0530667	0.0235	0.01738	kidney cancer	0.7741	0.184891	GCST90274762	21	43942626	0.0556	4.87e-06	21_43942626_T_C	13421	beta-nerve growth factor levels	0.00155405	0.00296333	39.8831	41.8887	20.8862
rs17647697	A	C	A	C	-0.1617	-0.00230265	0.9727	0.97444	kidney cancer	0.9864	0.135085	GCST90274762	7	130302087	0.0352	4.35e-06	7_130302087_A_C	14741	beta-nerve growth factor levels	0.0014297	0.00138865	20.4957	41.8887	21.1025
rs17689534	A	G	A	G	0.2208	-0.0875529	0.0229	0.02045	kidney cancer	0.6075	0.170454	GCST90274762	4	166807640	0.0462	1.76e-06	4_166807640_A_G	13421	beta-nerve growth factor levels	0.00169924	0.00218174	29.3408	41.8887	22.841
rs183185212	A	C	A	C	-0.2977	0.182988	0.9883	0.98875	kidney cancer	0.3784	0.207741	GCST90274762	11	9434918	0.0657	5.86e-06	11_9434918_A_C	13808	beta-nerve growth factor levels	0.00148496	0.00204957	28.3544	41.8887	20.5318
rs1878359	A	G	A	G	0.0626	0.0483139	0.719	0.7434	kidney cancer	0.2798	0.0447032	GCST90274762	8	122948812	0.0126	6.76e-07	8_122948812_A_G	14740	beta-nerve growth factor levels	0.00167202	0.00158348	23.3744	41.8887	24.6835
rs2237172	A	G	A	G	0.0619	-0.0321767	0.7375	0.7454	kidney cancer	0.4733	0.0448694	GCST90274762	6	16601587	0.0136	5.33e-06	6_16601587_A_G	14295	beta-nerve growth factor levels	0.00144728	0.00148355	21.2359	41.8887	20.7159
rs3128517	T	C	T	C	-0.0775	0.0183677	0.4965	0.5123	kidney cancer	0.8206	0.0809957	GCST90274762	9	90362040	0.0118	5.11e-11	9_90362040_T_C	14295	beta-nerve growth factor levels	0.0030089	0.00300298	43.0508	41.8887	43.136
rs34559191	T	C	T	C	0.0607	-0.0137056	0.3088	0.3016	kidney cancer	0.7778	0.0485693	GCST90274762	19	16434937	0.0124	9.82e-07	19_16434937_T_C	13675	beta-nerve growth factor levels	0.00174948	0.00157285	21.5395	41.8887	23.9626
rs397081	T	C	T	C	0.1203	0.0174469	0.9514	0.95706	kidney cancer	0.8571	0.0968913	GCST90274762	6	32192617	0.0262	4.4e-06	6_32192617_T_C	14743	beta-nerve growth factor levels	0.00142817	0.00133832	19.7546	41.8887	21.0828
rs4017	T	C	T	C	-0.1187	-0.0520304	0.9491	0.96933	kidney cancer	0.5486	0.0867377	GCST90274762	4	164064099	0.0258	4.21e-06	4_164064099_T_C	14742	beta-nerve growth factor levels	0.00143397	0.00136132	20.0933	41.8887	21.1671
rs4087847	T	G	T	G	-0.1546	0.188259	0.0301	0.0317	kidney cancer	0.1553	0.132478	GCST90274762	18	2455418	0.0343	6.57e-06	18_2455418_T_G	14743	beta-nerve growth factor levels	0.00137628	0.00139554	20.6004	41.8887	20.3157
rs4980184	T	C	T	C	0.2352	0.0303352	0.9836	0.98671	kidney cancer	0.9354	0.374265	GCST90274762	10	125058869	0.0521	6.35e-06	10_125058869_T_C	14295	beta-nerve growth factor levels	0.00142383	0.00178471	25.5544	41.8887	20.3798
rs62092633	T	C	T	C	-0.1249	-0.162714	0.1005	0.07362	kidney cancer	0.07132	0.0902245	GCST90274762	18	55441626	0.0259	1.42e-06	18_55441626_T_C	11344	beta-nerve growth factor levels	0.00204619	0.00282047	32.0803	41.8887	23.2555
rs62494116	T	C	T	C	0.0578	-0.0113643	0.6636	0.635	kidney cancer	0.7827	0.0412046	GCST90274762	8	13332042	0.0117	7.81e-07	8_13332042_T_C	14729	beta-nerve growth factor levels	0.00165444	0.00149158	21.9994	41.8887	24.4053
rs6328	A	C	A	C	-0.0797	-0.0285875	0.3498	0.3446	kidney cancer	0.4912	0.0415273	GCST90274762	1	115829943	0.0122	6.46e-11	1_115829943_A_C	13224	beta-nerve growth factor levels	0.00321736	0.00288944	38.3149	41.8887	42.6773
rs7149605	A	G	A	G	0.0862	0.0407178	0.0949	0.08384	kidney cancer	0.5465	0.067524	GCST90274762	14	94854041	0.0195	9.85e-06	14_94854041_A_G	14731	beta-nerve growth factor levels	0.00132494	0.00127646	18.825	41.8887	19.5409
rs72673086	A	G	A	G	0.0584	-0.0153811	0.3152	0.2781	kidney cancer	0.726	0.0438894	GCST90274762	4	96824143	0.0126	3.57e-06	4_96824143_A_G	12858	beta-nerve growth factor levels	0.00166822	0.00147233	18.9562	41.8887	21.4825
rs73782207	A	G	A	G	0.0925	0.0421771	0.0825	0.08487	kidney cancer	0.5682	0.0739035	GCST90274762	6	150452471	0.0205	6.42e-06	6_150452471_A_G	14734	beta-nerve growth factor levels	0.00138011	0.00129531	19.1072	41.8887	20.3599
rs74639669	A	T	A	T	-0.1748	-0.240355	0.0281	0.01636	kidney cancer	0.124	0.156257	GCST90274762	18	5679360	0.0386	5.94e-06	18_5679360_A_T	14733	beta-nerve growth factor levels	0.00139018	0.00166894	24.6263	41.8887	20.5073
rs77493302	T	C	T	C	0.0853	-0.0264466	0.8904	0.8865	kidney cancer	0.6827	0.0646963	GCST90274762	6	838092	0.0185	4.01e-06	6_838092_T_C	14743	beta-nerve growth factor levels	0.00144013	0.00142012	20.9637	41.8887	21.2596
rs78167655	T	C	T	C	-0.1646	-0.153922	0.0262	0.02454	kidney cancer	0.2092	0.122572	GCST90274762	4	119266088	0.0365	6.5e-06	4_119266088_T_C	14743	beta-nerve growth factor levels	0.00137768	0.00138249	20.4074	41.8887	20.3364
rs9479501	T	G	T	G	0.0629	-0.0152826	0.2135	0.2485	kidney cancer	0.7413	0.0462924	GCST90274762	6	153400418	0.0137	4.41e-06	6_153400418_T_G	14729	beta-nerve growth factor levels	0.0014293	0.0013287	19.5938	41.8887	21.0795
rs9599159	T	C	T	C	-0.175	-0.240671	0.9756	0.9683	kidney cancer	0.03601	0.114779	GCST90274762	13	67428046	0.0387	6.13e-06	13_67428046_T_C	14730	beta-nerve growth factor levels	0.00138646	0.00145803	21.5053	41.8887	20.4482
rs10024203	A	C	A	C	0.0922	-0.00518653	0.094	0.091	kidney cancer	0.9364	0.0649978	GCST90274763	4	5786594	0.0203	5.58e-06	4_5786594_A_C	14735	Caspase 8 levels	0.00139821	0.00144793	21.3633	41.8887	20.6286
rs1032417	C	G	C	G	-0.0858	0.0805656	0.1545	0.1442	kidney cancer	0.1138	0.0509477	GCST90274763	12	62645486	0.0165	1.99e-07	12_62645486_C_G	14296	Caspase 8 levels	0.00188813	0.0019233	27.5446	41.8887	27.04
rs111764025	C	G	C	G	0.1095	-0.0322133	0.9304	0.93047	kidney cancer	0.6718	0.0760324	GCST90274763	8	5557775	0.0238	4.21e-06	8_5557775_C_G	14731	Caspase 8 levels	0.00143508	0.00155288	22.9079	41.8887	21.1677
rs11216018	A	G	A	G	-0.0539	-0.0300469	0.3708	0.3446	kidney cancer	0.4629	0.0409314	GCST90274763	11	98455719	0.0121	8.41e-06	11_98455719_A_G	14296	Caspase 8 levels	0.00138628	0.00135561	19.4034	41.8887	19.843
rs11695193	A	T	A	T	-0.0806	-0.0280042	0.1582	0.1595	kidney cancer	0.6112	0.0550872	GCST90274763	2	231090015	0.0162	6.51e-07	2_231090015_A_T	14743	Caspase 8 levels	0.00167643	0.00173028	25.5502	41.8887	24.7537
rs11709039	T	C	T	C	0.0781	-0.016536	0.856	0.8589	kidney cancer	0.7669	0.0557833	GCST90274763	3	152332673	0.0168	3.34e-06	3_152332673_T_C	14743	Caspase 8 levels	0.00146393	0.00150373	22.1998	41.8887	21.6114
rs12073499	A	C	A	C	-0.0812	0.0248877	0.8466	0.8405	kidney cancer	0.6674	0.0579162	GCST90274763	1	157270515	0.0167	1.16e-06	1_157270515_A_C	14295	Caspase 8 levels	0.00165135	0.00171256	24.5196	41.8887	23.6417
rs13188908	T	C	T	C	0.0668	-0.100207	0.1902	0.18	kidney cancer	0.05102	0.0513538	GCST90274763	5	179923576	0.015	8.45e-06	5_179923576_T_C	14736	Caspase 8 levels	0.00134421	0.00137458	20.281	41.8887	19.8322
rs137887001	C	G	C	G	0.2318	-0.310064	0.9827	0.98364	kidney cancer	0.01657	0.129403	GCST90274763	20	44566861	0.0486	1.85e-06	20_44566861_C_G	14296	Caspase 8 levels	0.00158895	0.00182694	26.1621	41.8887	22.7486
rs1467702	A	G	A	G	-0.0962	0.0892685	0.0863	0.08282	kidney cancer	0.2456	0.0768825	GCST90274763	10	129961901	0.0215	7.66e-06	10_129961901_A_G	14743	Caspase 8 levels	0.0013563	0.00145947	21.5455	41.8887	20.0204
rs148608719	A	G	A	G	0.3474	0.0220411	0.0145	0.01329	kidney cancer	0.9181	0.214351	GCST90274763	5	180339648	0.0683	3.65e-07	5_180339648_A_G	12745	Caspase 8 levels	0.00202612	0.00344917	44.1049	41.8887	25.8713
rs2411067	A	G	A	G	-0.0706	0.0331432	0.685	0.7086	kidney cancer	0.4972	0.0488189	GCST90274763	17	75033876	0.0157	6.9e-06	17_75033876_A_G	11345	Caspase 8 levels	0.00177954	0.002151	24.4514	41.8887	20.2213
rs34154371	T	C	T	C	-0.2016	0.0818564	0.9714	0.97648	kidney cancer	0.6022	0.157042	GCST90274763	1	2338015	0.0422	1.78e-06	1_2338015_T_C	13232	Caspase 8 levels	0.00172206	0.00225827	29.9445	41.8887	22.8221
rs56097553	A	G	A	G	0.1384	-0.0263498	0.0405	0.03988	kidney cancer	0.786	0.0970496	GCST90274763	12	82467039	0.0312	9.17e-06	12_82467039_A_G	14744	Caspase 8 levels	0.00133299	0.00148868	21.9789	41.8887	19.6772
rs56328050	C	G	C	G	-0.1987	0.0397975	0.8696	0.8834	kidney cancer	0.4912	0.0578114	GCST90274763	2	202164805	0.0173	1.56e-30	2_202164805_C_G	14743	Caspase 8 levels	0.00886967	0.00895412	133.185	41.8887	131.918
rs7146962	T	C	T	C	-0.0613	-0.0187752	0.7483	0.7413	kidney cancer	0.6743	0.0446757	GCST90274763	14	54145317	0.0135	5.61e-06	14_54145317_T_C	14295	Caspase 8 levels	0.00144047	0.0014155	20.2604	41.8887	20.6183
rs7287303	T	C	T	C	0.0985	0.084578	0.1249	0.1227	kidney cancer	0.5608	0.14541	GCST90274763	22	48714112	0.0222	9.12e-06	22_48714112_T_C	11791	Caspase 8 levels	0.00166711	0.00212091	25.0566	41.8887	19.6864
rs73306603	T	C	T	C	0.2044	-0.0324199	0.978	0.98875	kidney cancer	0.8046	0.131043	GCST90274763	10	84027526	0.0412	7.01e-07	10_84027526_T_C	14741	Caspase 8 levels	0.00166715	0.00179785	26.5462	41.8887	24.6132
rs7418913	A	G	A	G	-0.0614	0.0173496	0.2714	0.272	kidney cancer	0.726	0.0495066	GCST90274763	1	203643268	0.0138	8.62e-06	1_203643268_A_G	14296	Caspase 8 levels	0.00138301	0.00149096	21.3436	41.8887	19.7961
rs78449258	A	G	A	G	-0.2001	0.00329457	0.9804	0.98466	kidney cancer	0.9798	0.130119	GCST90274763	9	22742536	0.0428	2.94e-06	9_22742536_A_G	14744	Caspase 8 levels	0.00148049	0.00153881	22.72	41.8887	21.8578
rs10911109	A	G	A	G	-0.0767	0.0555127	0.1696	0.2065	kidney cancer	0.2711	0.0504417	GCST90274764	1	172117232	0.0172	8.22e-06	1_172117232_A_G	11774	Eotaxin levels	0.00168636	0.00165704	19.5391	41.8887	19.8854
rs114744647	T	C	T	C	0.2107	0.0124225	0.9774	0.97853	kidney cancer	0.9305	0.142434	GCST90274764	16	24006879	0.0451	2.99e-06	16_24006879_T_C	14730	Eotaxin levels	0.00147975	0.00196128	28.9425	41.8887	21.8261
rs12075	A	G	A	G	0.0749	-0.0557185	0.5547	0.6053	kidney cancer	0.1542	0.0391048	GCST90274764	1	159175354	0.0114	5.03e-11	1_159175354_A_G	14731	Eotaxin levels	0.0029222	0.00277143	40.9339	41.8887	43.1672
rs12453306	C	G	C	G	-0.1089	-0.0151136	0.9022	0.91922	kidney cancer	0.8376	0.0737379	GCST90274764	17	77253324	0.0244	8.08e-06	17_77253324_C_G	11335	Eotaxin levels	0.00175456	0.0020928	23.7674	41.8887	19.9194
rs139476527	T	G	T	G	0.2826	0.0612373	0.0125	0.01125	kidney cancer	0.7203	0.171026	GCST90274764	20	49033630	0.0606	3.11e-06	20_49033630_T_G	12933	Eotaxin levels	0.00167895	0.00197161	25.5453	41.8887	21.747
rs139597204	A	C	A	C	-0.3374	0.0522411	0.0128	0.01125	kidney cancer	0.8115	0.219048	GCST90274764	4	104507060	0.0714	2.3e-06	4_104507060_A_C	12303	Eotaxin levels	0.00181203	0.00287697	35.4917	41.8887	22.3303
rs140965534	T	C	T	C	-0.2283	0.0517144	0.0172	0.01329	kidney cancer	0.7707	0.177433	GCST90274764	8	49300287	0.0514	8.93e-06	8_49300287_T_C	14238	Eotaxin levels	0.00138387	0.00176212	25.1298	41.8887	19.7281
rs148554043	T	C	T	C	0.4043	-0.225381	0.0083	0.01125	kidney cancer	0.6453	0.489638	GCST90274764	3	175964549	0.0898	6.72e-06	3_175964549_T_C	11726	Eotaxin levels	0.00172595	0.00269089	31.6331	41.8887	20.27
rs151240414	A	G	A	G	0.2299	0.068493	0.0222	0.01431	kidney cancer	0.6435	0.147994	GCST90274764	5	130672061	0.0508	6.02e-06	5_130672061_A_G	11335	Eotaxin levels	0.00180394	0.00229462	26.0647	41.8887	20.481
rs1564995	A	G	A	G	-0.0609	0.00481156	0.6155	0.635	kidney cancer	0.9535	0.0825138	GCST90274764	11	24773107	0.0131	3.34e-06	11_24773107_A_G	14286	Eotaxin levels	0.00151073	0.00175545	25.119	41.8887	21.6119
rs170520	A	G	A	G	0.0554	0.0386369	0.3264	0.3119	kidney cancer	0.3463	0.0410249	GCST90274764	18	38337850	0.0125	9.34e-06	18_38337850_A_G	14285	Eotaxin levels	0.00137336	0.00134959	19.3022	41.8887	19.6426
rs2112920	C	G	C	G	0.0817	-0.0262413	0.8362	0.8303	kidney cancer	0.6124	0.0517937	GCST90274764	19	37955248	0.016	3.29e-07	19_37955248_C_G	14286	Eotaxin levels	0.00182206	0.00182851	26.1663	41.8887	26.0738
rs2201150	T	C	T	C	0.0785	-0.012275	0.3561	0.3538	kidney cancer	0.762	0.040531	GCST90274764	3	46258902	0.0123	1.75e-10	3_46258902_T_C	14286	Eotaxin levels	0.00284343	0.00282592	40.4798	41.8887	40.7314
rs2228467	T	C	T	C	-0.3316	-0.0293258	0.9289	0.93149	kidney cancer	0.7117	0.0793504	GCST90274764	3	42906116	0.0225	3.69e-49	3_42906116_T_C	14733	Eotaxin levels	0.0145303	0.0145244	217.112	41.8887	217.202
rs34536806	T	G	T	G	0.1017	0.0187236	0.9023	0.90798	kidney cancer	0.7909	0.0706173	GCST90274764	11	95274487	0.0208	1.01e-06	11_95274487_T_G	14286	Eotaxin levels	0.00167086	0.00182355	26.0952	41.8887	23.9065
rs35543857	A	G	A	G	-0.1138	-0.106695	0.9282	0.94376	kidney cancer	0.1827	0.0800718	GCST90274764	12	105757994	0.0244	3.1e-06	12_105757994_A_G	14286	Eotaxin levels	0.00152053	0.00172616	24.6991	41.8887	21.7523
rs6894241	A	C	A	C	-0.0656	-0.0377774	0.2333	0.2444	kidney cancer	0.4187	0.0467149	GCST90274764	5	118058126	0.0137	1.68e-06	5_118058126_A_C	14715	Eotaxin levels	0.00155593	0.00153949	22.6855	41.8887	22.928
rs73171545	A	G	A	G	-0.0861	-0.0347878	0.1199	0.1258	kidney cancer	0.6343	0.0731323	GCST90274764	22	45003109	0.0187	4.14e-06	22_45003109_A_G	14286	Eotaxin levels	0.00148193	0.00156454	22.383	41.8887	21.1994
rs73209015	A	T	A	T	-0.0913	-0.00109939	0.1104	0.07362	kidney cancer	0.9872	0.0685276	GCST90274764	8	11700967	0.0189	1.36e-06	8_11700967_A_T	14728	Eotaxin levels	0.00158214	0.00163733	24.1508	41.8887	23.3355
rs757973	A	G	A	G	0.2002	-0.122394	0.09	0.09816	kidney cancer	0.09198	0.0726353	GCST90274764	7	75495667	0.0205	1.58e-22	7_75495667_A_G	14713	Eotaxin levels	0.00644127	0.00656511	97.2176	41.8887	95.3719
rs79432525	T	G	T	G	0.1929	0.177728	0.9754	0.97546	kidney cancer	0.2172	0.144025	GCST90274764	10	128183195	0.0422	4.85e-06	10_128183195_T_G	14247	Eotaxin levels	0.00146467	0.00178572	25.483	41.8887	20.8949
rs79684468	T	C	T	C	0.1502	-0.0666301	0.0433	0.02863	kidney cancer	0.5367	0.107849	GCST90274764	3	43179320	0.0303	7.16e-07	3_43179320_T_C	14286	Eotaxin levels	0.00171735	0.0018691	26.7483	41.8887	24.5728
rs79722574	T	C	T	C	-0.1215	-0.0427721	0.167	0.1626	kidney cancer	0.4256	0.0536836	GCST90274764	17	32619052	0.0156	6.78e-15	17_32619052_T_C	14720	Eotaxin levels	0.00410458	0.00410718	60.6988	41.8887	60.6601
rs9303380	A	G	A	G	0.1213	0.124996	0.0494	0.0593	kidney cancer	0.1458	0.0859361	GCST90274764	17	54117492	0.0272	8.21e-06	17_54117492_A_G	14286	Eotaxin levels	0.00139037	0.0013819	19.7664	41.8887	19.8877
rs9940390	T	C	T	C	-0.0818	0.0235757	0.7358	0.728	kidney cancer	0.5937	0.0441922	GCST90274764	16	80051931	0.0133	7.73e-10	16_80051931_T_C	14286	Eotaxin levels	0.00264122	0.00260153	37.2572	41.8887	37.8271
rs9976282	A	G	A	G	-0.1678	-0.00588266	0.0333	0.03783	kidney cancer	0.9598	0.116709	GCST90274764	21	39593226	0.0345	1.15e-06	21_39593226_A_G	14722	Eotaxin levels	0.0016045	0.0018128	26.7329	41.8887	23.6562
rs10242459	A	G	A	G	0.0729	-0.040822	0.8219	0.8313	kidney cancer	0.4163	0.0502204	GCST90274765	7	3911280	0.0154	2.2e-06	7_3911280_A_G	14729	C-C motif chemokine 19 levels	0.00151928	0.00155585	22.9487	41.8887	22.4085
rs10496135	C	G	C	G	0.1856	0.201307	0.9689	0.96728	kidney cancer	0.1588	0.14286	GCST90274765	2	66640363	0.0384	1.34e-06	2_66640363_C_G	14288	C-C motif chemokine 19 levels	0.00163258	0.00207599	29.7193	41.8887	23.3611
rs111317412	A	C	A	C	-0.1236	0.0459289	0.9429	0.92536	kidney cancer	0.5874	0.0846448	GCST90274765	14	48619204	0.0274	6.45e-06	14_48619204_A_C	14288	C-C motif chemokine 19 levels	0.00142235	0.00164501	23.5393	41.8887	20.3487
rs11174279	A	T	A	T	-0.0694	0.105805	0.1741	0.181	kidney cancer	0.03541	0.0502962	GCST90274765	12	62401393	0.0156	8.64e-06	12_62401393_A_T	14730	C-C motif chemokine 19 levels	0.00134197	0.00138508	20.4278	41.8887	19.7911
rs113539352	C	G	C	G	0.4485	-0.0626204	0.992	0.98875	kidney cancer	0.8788	0.410651	GCST90274765	3	58516854	0.0922	1.15e-06	3_58516854_C_G	11439	C-C motif chemokine 19 levels	0.00206468	0.00319269	36.6317	41.8887	23.6626
rs11574915	A	C	A	C	-0.1464	-0.0229616	0.8639	0.8661	kidney cancer	0.6945	0.0584628	GCST90274765	9	34710084	0.017	7.19e-18	9_34710084_A_C	14733	C-C motif chemokine 19 levels	0.00500923	0.00504004	74.6209	41.8887	74.1625
rs11877886	A	G	A	G	-0.1065	0.0115332	0.0669	0.07873	kidney cancer	0.879	0.0757584	GCST90274765	18	69226577	0.0239	8.35e-06	18_69226577_A_G	14722	C-C motif chemokine 19 levels	0.00134713	0.00141607	20.8741	41.8887	19.8565
rs11961362	T	C	T	C	-0.1185	-0.864239	0.0713	0.07873	kidney cancer	0.02527	0.386295	GCST90274765	6	81004579	0.0264	7.17e-06	6_81004579_T_C	12851	C-C motif chemokine 19 levels	0.00156559	0.00185965	23.9392	41.8887	20.1479
rs12521515	A	T	A	T	0.086	-0.0238829	0.861	0.8538	kidney cancer	0.6662	0.0553654	GCST90274765	5	123121314	0.0192	7.49e-06	5_123121314_A_T	11780	C-C motif chemokine 19 levels	0.00170053	0.00177029	20.8875	41.8887	20.0629
rs13212719	A	G	A	G	0.0671	-0.0409262	0.8005	0.8098	kidney cancer	0.4221	0.0509803	GCST90274765	6	133835436	0.015	7.7e-06	6_133835436_A_G	14288	C-C motif chemokine 19 levels	0.00139876	0.00143807	20.5738	41.8887	20.0107
rs138108512	A	G	A	G	-0.2939	0.180803	0.0119	0.01227	kidney cancer	0.3115	0.178645	GCST90274765	14	76855291	0.0616	1.83e-06	14_76855291_A_G	13422	C-C motif chemokine 19 levels	0.00169336	0.00203131	27.3157	41.8887	22.7634
rs138440733	A	G	A	G	-0.1724	-0.0601539	0.0585	0.05624	kidney cancer	0.8213	0.266317	GCST90274765	22	17731243	0.036	1.68e-06	22_17731243_A_G	12404	C-C motif chemokine 19 levels	0.00184576	0.00327401	40.7377	41.8887	22.9335
rs138618048	A	G	A	G	-0.2066	0.191039	0.0209	0.01329	kidney cancer	0.1345	0.12765	GCST90274765	14	100142541	0.046	7.08e-06	14_100142541_A_G	14247	C-C motif chemokine 19 levels	0.00141406	0.00174688	24.9279	41.8887	20.1718
rs1415763	C	G	C	G	0.0757	-0.0264472	0.1687	0.1656	kidney cancer	0.6258	0.0542343	GCST90274765	6	125027776	0.0157	1.42e-06	6_125027776_C_G	14731	C-C motif chemokine 19 levels	0.00157592	0.00160729	23.7119	41.8887	23.2484
rs147708384	T	C	T	C	-0.2707	0.00461061	0.0151	0.01738	kidney cancer	0.9802	0.185776	GCST90274765	17	14918425	0.0574	2.4e-06	17_14918425_T_C	13801	C-C motif chemokine 19 levels	0.00160918	0.00217959	30.1419	41.8887	22.2409
rs1654018	T	C	T	C	0.2391	0.454319	0.9738	0.96217	kidney cancer	0.1388	0.306915	GCST90274765	3	71575288	0.0538	8.82e-06	3_71575288_T_C	10894	C-C motif chemokine 19 levels	0.00181009	0.00291716	31.8667	41.8887	19.7513
rs192686691	C	G	C	G	0.2648	-0.350234	0.0195	0.01022	kidney cancer	0.1094	0.218774	GCST90274765	3	12700866	0.0589	6.93e-06	3_12700866_C_G	10795	C-C motif chemokine 19 levels	0.00186918	0.00268132	29.0173	41.8887	20.2118
rs2070746	T	G	T	G	-0.0575	-0.0374884	0.307	0.271	kidney cancer	0.3884	0.0434637	GCST90274765	19	52249702	0.0128	7.05e-06	19_52249702_T_G	14288	C-C motif chemokine 19 levels	0.00141056	0.00140682	20.1261	41.8887	20.1797
rs34791102	A	G	A	G	0.1238	0.0947503	0.0534	0.06544	kidney cancer	0.2341	0.0796313	GCST90274765	9	35612978	0.0265	2.99e-06	9_35612978_A_G	14735	C-C motif chemokine 19 levels	0.00147916	0.00154945	22.8636	41.8887	21.8248
rs374784992	A	G	A	G	0.1335	0.144879	0.9401	0.94888	kidney cancer	0.1565	0.102248	GCST90274765	4	119585039	0.0298	7.47e-06	4_119585039_A_G	11760	C-C motif chemokine 19 levels	0.00170395	0.00200721	23.6483	41.8887	20.0692
rs3792790	A	C	A	C	0.0551	-0.0325232	0.4736	0.4519	kidney cancer	0.4142	0.0398312	GCST90274765	5	150442171	0.012	4.4e-06	5_150442171_A_C	14288	C-C motif chemokine 19 levels	0.00147363	0.00151377	21.6585	41.8887	21.0834
rs4356912	T	C	T	C	-0.0592	-0.117996	0.6909	0.6973	kidney cancer	0.01223	0.0470958	GCST90274765	4	7444846	0.0133	8.54e-06	4_7444846_T_C	14288	C-C motif chemokine 19 levels	0.00138493	0.00149688	21.4165	41.8887	19.8125
rs454265	A	G	A	G	-0.0561	-0.00319489	0.6505	0.6125	kidney cancer	0.9379	0.0410077	GCST90274765	8	81339142	0.0124	6.06e-06	8_81339142_A_G	14728	C-C motif chemokine 19 levels	0.00138802	0.00143103	21.1036	41.8887	20.4683
rs4554017	T	C	T	C	0.0596	-0.00259663	0.3904	0.411	kidney cancer	0.9478	0.0396615	GCST90274765	4	145124024	0.0122	1.03e-06	4_145124024_T_C	14288	C-C motif chemokine 19 levels	0.00166777	0.00169074	24.1948	41.8887	23.8656
rs4907572	A	G	A	G	-0.0671	0.00611868	0.2653	0.2515	kidney cancer	0.9033	0.0503621	GCST90274765	13	113647321	0.0137	9.69e-07	13_113647321_A_G	14722	C-C motif chemokine 19 levels	0.001627	0.00175518	25.8817	41.8887	23.9885
rs62292952	T	G	T	G	0.2346	-0.0410304	0.8822	0.8885	kidney cancer	0.4997	0.0607891	GCST90274765	3	132200719	0.0185	7.53e-37	3_132200719_T_G	14728	C-C motif chemokine 19 levels	0.0108022	0.0114393	170.404	41.8887	160.81
rs6486995	A	T	A	T	-0.0697	0.000900405	0.2452	0.2556	kidney cancer	0.9852	0.0485391	GCST90274765	12	19813981	0.0135	2.43e-07	12_19813981_A_T	14735	C-C motif chemokine 19 levels	0.00180602	0.00179824	26.5412	41.8887	26.6562
rs6535499	T	C	T	C	-0.1216	-0.169011	0.0583	0.0501	kidney cancer	0.05427	0.0878125	GCST90274765	4	76428761	0.0272	7.8e-06	4_76428761_T_C	14288	C-C motif chemokine 19 levels	0.00139705	0.0016236	23.2324	41.8887	19.9862
rs6870560	T	C	T	C	0.0863	0.0316924	0.8559	0.8783	kidney cancer	0.577	0.0568197	GCST90274765	5	174187919	0.0169	3.28e-07	5_174187919_T_C	14732	C-C motif chemokine 19 levels	0.00176717	0.00183712	27.1106	41.8887	26.0764
rs74764632	A	T	A	T	0.1349	-0.0161294	0.9557	0.94785	kidney cancer	0.8627	0.0932667	GCST90274765	16	57300587	0.0294	4.47e-06	16_57300587_A_T	14734	C-C motif chemokine 19 levels	0.00142708	0.00154092	22.7358	41.8887	21.0537
rs7595241	C	G	C	G	0.0615	0.0858847	0.6941	0.7147	kidney cancer	0.08514	0.0498863	GCST90274765	2	7425475	0.013	2.24e-06	2_7425475_C_G	14288	C-C motif chemokine 19 levels	0.00156413	0.00160613	22.9821	41.8887	22.3802
rs76295077	T	C	T	C	0.0928	-0.0238829	0.8962	0.8885	kidney cancer	0.7022	0.0624632	GCST90274765	13	23257952	0.0208	8.14e-06	13_23257952_T_C	14288	C-C motif chemokine 19 levels	0.00139141	0.00160224	22.9264	41.8887	19.9053
rs79086127	T	C	T	C	-0.2096	0.174353	0.0195	0.01534	kidney cancer	0.1912	0.133396	GCST90274765	4	123839263	0.045	3.2e-06	4_123839263_T_C	14247	C-C motif chemokine 19 levels	0.00152067	0.00167994	23.9711	41.8887	21.6949
rs9469127	C	G	C	G	-0.4884	0.10075	0.9365	0.9407	kidney cancer	0.4195	0.1248	GCST90274765	6	32444093	0.0277	1.41e-69	6_32444093_C_G	14735	C-C motif chemokine 19 levels	0.0206648	0.0283702	430.183	41.8887	310.879
rs10207134	T	C	T	C	-0.0996	-0.00813298	0.326	0.3436	kidney cancer	0.8438	0.0412768	GCST90274766	2	228661828	0.0128	7.18e-15	2_228661828_T_C	14287	C-C motif chemokine 20 levels	0.00422067	0.00435939	62.5466	41.8887	60.5479
rs1027232	A	C	A	C	0.1072	-0.0283931	0.0762	0.07157	kidney cancer	0.7564	0.0915281	GCST90274766	15	40077948	0.0238	6.66e-06	15_40077948_A_C	14730	C-C motif chemokine 20 levels	0.00137561	0.0016179	23.8671	41.8887	20.2878
rs10837780	T	C	T	C	0.1191	0.0648586	0.9413	0.9407	kidney cancer	0.4592	0.0876272	GCST90274766	11	42142787	0.026	4.63e-06	11_42142787_T_C	14288	C-C motif chemokine 20 levels	0.00146666	0.00156754	22.4291	41.8887	20.9834
rs111674022	T	C	T	C	-0.0953	0.0278852	0.0967	0.0726	kidney cancer	0.7006	0.0725213	GCST90274766	1	238606022	0.0208	4.61e-06	1_238606022_T_C	14288	C-C motif chemokine 20 levels	0.00146727	0.00158662	22.7025	41.8887	20.9923
rs11242693	T	C	T	C	0.0637	0.00712533	0.3674	0.3926	kidney cancer	0.9347	0.0869653	GCST90274766	6	1448190	0.0135	2.38e-06	6_1448190_T_C	12404	C-C motif chemokine 20 levels	0.00179201	0.00188615	23.4363	41.8887	22.2644
rs1129474	T	C	T	C	0.0573	0.0641009	0.5396	0.5337	kidney cancer	0.1506	0.0445946	GCST90274766	8	22584718	0.012	1.8e-06	8_22584718_T_C	14288	C-C motif chemokine 20 levels	0.00159347	0.00163135	23.3435	41.8887	22.8006
rs11582772	T	C	T	C	0.2585	-0.15642	0.9859	0.98364	kidney cancer	0.3756	0.17654	GCST90274766	1	32260562	0.0548	2.39e-06	1_32260562_T_C	14243	C-C motif chemokine 20 levels	0.00156006	0.00185782	26.5064	41.8887	22.2515
rs117753190	C	G	C	G	-0.185	0.0863612	0.9688	0.97444	kidney cancer	0.4352	0.110673	GCST90274766	17	67136325	0.0359	2.56e-07	17_67136325_C_G	14243	C-C motif chemokine 20 levels	0.00186125	0.00206901	29.5258	41.8887	26.5555
rs118164045	T	C	T	C	0.1297	0.141326	0.9526	0.95194	kidney cancer	0.1371	0.0950616	GCST90274766	14	92792639	0.0289	7.19e-06	14_92792639_T_C	14288	C-C motif chemokine 20 levels	0.00140787	0.00151914	21.7355	41.8887	20.1412
rs13049624	A	G	A	G	-0.1315	-0.00270365	0.9476	0.93456	kidney cancer	0.9759	0.0894968	GCST90274766	21	44005002	0.0276	1.89e-06	21_44005002_A_G	14288	C-C motif chemokine 20 levels	0.00158647	0.00171727	24.5751	41.8887	22.7004
rs13185268	T	C	T	C	0.1091	0.103008	0.9296	0.93763	kidney cancer	0.2285	0.0855381	GCST90274766	5	133019542	0.0239	5e-06	5_133019542_T_C	14724	C-C motif chemokine 20 levels	0.00141342	0.00155793	22.9717	41.8887	20.8379
rs151092565	T	C	T	C	-0.1512	0.144332	0.0376	0.03374	kidney cancer	0.1739	0.106144	GCST90274766	14	94625543	0.0328	4.03e-06	14_94625543_T_C	14728	C-C motif chemokine 20 levels	0.00144094	0.00165454	24.4051	41.8887	21.2499
rs2796032	T	C	T	C	0.0636	-0.0241902	0.3159	0.2751	kidney cancer	0.5653	0.0420709	GCST90274766	9	115519904	0.0127	5.5e-07	9_115519904_T_C	14718	C-C motif chemokine 20 levels	0.00170129	0.00174829	25.7729	41.8887	25.0788
rs34729167	T	C	T	C	0.0801	-0.0386436	0.136	0.1186	kidney cancer	0.5424	0.0634347	GCST90274766	6	162943133	0.0179	7.65e-06	6_162943133_T_C	14288	C-C motif chemokine 20 levels	0.00139972	0.00150781	21.5732	41.8887	20.0244
rs348389	T	C	T	C	-0.055	-0.0215658	0.3574	0.3323	kidney cancer	0.64	0.0461104	GCST90274766	19	6535637	0.0124	9.19e-06	19_6535637_T_C	14288	C-C motif chemokine 20 levels	0.00137523	0.00138948	19.8777	41.8887	19.6735
rs35833676	T	C	T	C	0.0804	0.0267547	0.1452	0.1636	kidney cancer	0.6238	0.054549	GCST90274766	21	32961256	0.0166	1.28e-06	21_32961256_T_C	14732	C-C motif chemokine 20 levels	0.00159002	0.00160462	23.6741	41.8887	23.4583
rs3798304	C	G	C	G	-0.0624	-0.0253178	0.7473	0.7546	kidney cancer	0.5707	0.0446506	GCST90274766	6	167363434	0.0138	6.13e-06	6_167363434_C_G	14287	C-C motif chemokine 20 levels	0.00142925	0.00147062	21.0387	41.8887	20.4461
rs41302923	A	G	A	G	0.1939	0.0558131	0.9774	0.98364	kidney cancer	0.6626	0.127916	GCST90274766	10	127693479	0.0414	2.82e-06	10_127693479_A_G	14726	C-C motif chemokine 20 levels	0.00148759	0.00166099	24.4971	41.8887	21.9359
rs4981022	A	G	A	G	0.0635	0.0278852	0.6933	0.6871	kidney cancer	0.5096	0.0422849	GCST90274766	12	104149874	0.0128	7.02e-07	12_104149874_A_G	14721	C-C motif chemokine 20 levels	0.00166926	0.0017148	25.2834	41.8887	24.6109
rs55891514	T	C	T	C	0.0955	0.0625052	0.9122	0.9274	kidney cancer	0.3345	0.0647662	GCST90274766	5	40408939	0.0213	7.34e-06	5_40408939_T_C	14735	C-C motif chemokine 20 levels	0.00136259	0.0014609	21.555	41.8887	20.1024
rs564398411	T	C	T	C	0.3494	-0.0549843	0.9856	0.98569	kidney cancer	0.7978	0.214619	GCST90274766	12	76655980	0.0713	9.56e-07	12_76655980_T_C	10407	C-C motif chemokine 20 levels	0.00230263	0.00346528	36.1817	41.8887	24.0141
rs5769672	T	G	T	G	-0.1184	0.204083	0.9406	0.9499	kidney cancer	0.03194	0.0951365	GCST90274766	22	49877754	0.0257	4.09e-06	22_49877754_T_G	14732	C-C motif chemokine 20 levels	0.00143883	0.00156648	23.1105	41.8887	21.2245
rs61945278	T	C	T	C	-0.2	-0.167715	0.028	0.03067	kidney cancer	0.2823	0.15599	GCST90274766	13	24524337	0.0451	9.22e-06	13_24524337_T_C	13386	C-C motif chemokine 20 levels	0.00146718	0.00217728	29.2043	41.8887	19.6656
rs62456601	T	C	T	C	0.0611	0.0138043	0.6697	0.6605	kidney cancer	0.7511	0.0435206	GCST90274766	7	55791153	0.0137	8.2e-06	7_55791153_T_C	12836	C-C motif chemokine 20 levels	0.00154741	0.00165159	21.2315	41.8887	19.8903
rs6420556	T	C	T	C	-0.0736	0.0171521	0.1755	0.1462	kidney cancer	0.7417	0.0520385	GCST90274766	18	56487606	0.0158	3.19e-06	18_56487606_T_C	14288	C-C motif chemokine 20 levels	0.0015166	0.00156767	22.4308	41.8887	21.6991
rs6498926	A	T	A	T	0.0616	0.0294617	0.3426	0.3354	kidney cancer	0.4805	0.0417601	GCST90274766	16	63795822	0.0134	4.29e-06	16_63795822_A_T	12844	C-C motif chemokine 20 levels	0.00164288	0.00170926	21.9879	41.8887	21.1325
rs73072893	A	G	A	G	0.2057	-0.00340579	0.9739	0.96728	kidney cancer	0.979	0.129386	GCST90274766	12	19657540	0.0422	1.09e-06	12_19657540_A_G	13230	C-C motif chemokine 20 levels	0.00179296	0.00215107	28.5156	41.8887	23.7598
rs742493	T	C	T	C	0.1459	0.0141001	0.883	0.8845	kidney cancer	0.8197	0.0618614	GCST90274766	6	40998167	0.0185	3.11e-15	6_40998167_T_C	14735	C-C motif chemokine 20 levels	0.00420384	0.00439832	65.0868	41.8887	62.1967
rs7749768	T	G	T	G	-0.0622	0.0202927	0.754	0.7587	kidney cancer	0.6556	0.0454997	GCST90274766	6	107477601	0.0138	6.57e-06	6_107477601_T_G	14709	C-C motif chemokine 20 levels	0.00137943	0.00143522	21.1381	41.8887	20.3153
rs9274623	T	G	T	G	-0.076	-0.134356	0.215	0.1984	kidney cancer	0.004623	0.0474389	GCST90274766	6	32635998	0.0148	2.82e-07	6_32635998_T_G	14288	C-C motif chemokine 20 levels	0.00184243	0.00194969	27.9077	41.8887	26.3696
rs9357723	A	G	A	G	0.0522	0.0124775	0.4744	0.4601	kidney cancer	0.7488	0.0389652	GCST90274766	6	51953097	0.0116	6.8e-06	6_51953097_A_G	14735	C-C motif chemokine 20 levels	0.00137258	0.00135885	20.0472	41.8887	20.25
rs1001495	T	C	T	C	0.0983	-0.0180621	0.9113	0.90695	kidney cancer	0.7987	0.0708236	GCST90274767	2	241647342	0.0215	4.83e-06	2_241647342_T_C	13650	C-C motif chemokine 23 levels	0.00152931	0.00156215	21.3535	41.8887	20.904
rs11017721	A	G	A	G	0.0971	-0.0340149	0.1154	0.1074	kidney cancer	0.595	0.0639853	GCST90274767	10	132905425	0.0186	1.79e-07	10_132905425_A_G	14288	C-C motif chemokine 23 levels	0.00190403	0.00192496	27.553	41.8887	27.2529
rs112492	A	G	A	G	-0.0692	0.0424846	0.7293	0.7249	kidney cancer	0.41	0.0515657	GCST90274767	11	1989274	0.014	7.7e-07	11_1989274_A_G	13224	C-C motif chemokine 23 levels	0.00184441	0.00189076	25.047	41.8887	24.4318
rs113959305	T	C	T	C	-0.1397	0.0915672	0.0559	0.04294	kidney cancer	0.2905	0.0866272	GCST90274767	22	51076281	0.0285	9.5e-07	22_51076281_T_C	13224	C-C motif chemokine 23 levels	0.00181392	0.00205993	27.2926	41.8887	24.0272
rs116683909	A	G	A	G	-0.21	0.0583709	0.0278	0.02863	kidney cancer	0.8723	0.363144	GCST90274767	3	14445911	0.0426	8.24e-07	3_14445911_A_G	14724	C-C motif chemokine 23 levels	0.00164792	0.0023838	35.1781	41.8887	24.3007
rs117639761	A	C	A	C	-0.3246	-0.0198966	0.9561	0.98057	kidney cancer	0.8923	0.146953	GCST90274767	17	34195180	0.0413	3.85e-15	17_34195180_A_C	14736	C-C motif chemokine 23 levels	0.00417503	0.00884494	131.484	41.8887	61.7727
rs12103669	A	G	A	G	-0.1778	0.0368715	0.0234	0.02147	kidney cancer	0.7769	0.130122	GCST90274767	17	47298101	0.0402	9.74e-06	17_47298101_A_G	14734	C-C motif chemokine 23 levels	0.00132609	0.00144486	21.3165	41.8887	19.5619
rs12204524	C	G	C	G	0.1164	0.034498	0.9291	0.9274	kidney cancer	0.634	0.072459	GCST90274767	6	86144743	0.0237	9.04e-07	6_86144743_C_G	14727	C-C motif chemokine 23 levels	0.00163547	0.00178503	26.3315	41.8887	24.1218
rs12949647	A	G	A	G	-0.0643	-0.0615563	0.7287	0.7444	kidney cancer	0.2103	0.0491373	GCST90274767	17	21386459	0.0137	2.69e-06	17_21386459_A_G	14288	C-C motif chemokine 23 levels	0.00153958	0.00163475	23.3922	41.8887	22.0283
rs143910182	T	C	T	C	0.2157	-0.101383	0.0255	0.01636	kidney cancer	0.5819	0.184127	GCST90274767	3	6127208	0.0449	1.56e-06	3_6127208_T_C	14730	C-C motif chemokine 23 levels	0.00156453	0.00231234	34.1351	41.8887	23.0785
rs146074782	A	G	A	G	-0.3061	-0.124604	0.0116	0.0184	kidney cancer	0.5473	0.207049	GCST90274767	1	203441260	0.0626	1.01e-06	1_203441260_A_G	12935	C-C motif chemokine 23 levels	0.00184534	0.00214856	27.8472	41.8887	23.9099
rs16971993	T	C	T	C	-0.1285	-0.290578	0.0956	0.09918	kidney cancer	0.1509	0.202302	GCST90274767	17	34445397	0.025	2.75e-07	17_34445397_T_C	14288	C-C motif chemokine 23 levels	0.00184592	0.00285532	40.9079	41.8887	26.4196
rs17092563	C	G	C	G	-0.202	-0.553907	0.9774	0.98569	kidney cancer	0.06457	0.299697	GCST90274767	10	116653091	0.0445	5.64e-06	10_116653091_C_G	14733	C-C motif chemokine 23 levels	0.00139683	0.00180266	26.6029	41.8887	20.6055
rs17735284	A	T	A	T	0.0927	0.026344	0.0922	0.08896	kidney cancer	0.6906	0.0661841	GCST90274767	11	84372512	0.0202	4.45e-06	11_84372512_A_T	14725	C-C motif chemokine 23 levels	0.00142837	0.0014385	21.2096	41.8887	21.0599
rs1926742	A	G	A	G	0.0574	0.0681258	0.3093	0.2843	kidney cancer	0.1027	0.0417463	GCST90274767	10	18295482	0.0125	4.39e-06	10_18295482_A_G	14725	C-C motif chemokine 23 levels	0.00143016	0.00140774	20.7554	41.8887	21.0865
rs2263318	A	G	A	G	-0.1027	-0.04095	0.0765	0.08078	kidney cancer	0.5565	0.0696371	GCST90274767	6	31432006	0.0232	9.57e-06	6_31432006_A_G	14735	C-C motif chemokine 23 levels	0.0013283	0.00149029	21.9891	41.8887	19.5959
rs2870238	T	C	T	C	0.0574	-0.0169554	0.4869	0.4693	kidney cancer	0.6615	0.0387249	GCST90274767	4	77373079	0.0114	4.78e-07	4_77373079_T_C	14736	C-C motif chemokine 23 levels	0.0017177	0.00164625	24.2958	41.8887	25.3521
rs2905095	T	C	T	C	0.0664	-0.0173486	0.3078	0.3057	kidney cancer	0.7176	0.0479684	GCST90274767	9	135902793	0.0148	7.24e-06	9_135902793_T_C	11337	C-C motif chemokine 23 levels	0.00177264	0.00187874	21.3356	41.8887	20.1286
rs376974828	T	C	T	C	-0.1724	-0.270027	0.0385	0.0409	kidney cancer	0.0617	0.14452	GCST90274767	19	11626019	0.039	9.85e-06	19_11626019_T_C	10696	C-C motif chemokine 23 levels	0.00182395	0.00220046	23.5837	41.8887	19.5409
rs4317138	T	C	T	C	0.0585	-0.0161686	0.6736	0.6708	kidney cancer	0.6972	0.0415535	GCST90274767	3	46462144	0.0127	4.1e-06	3_46462144_T_C	14288	C-C motif chemokine 23 levels	0.00148303	0.00150485	21.5307	41.8887	21.218
rs438811	T	C	T	C	0.0669	0.00270365	0.2405	0.2229	kidney cancer	0.9593	0.0529795	GCST90274767	19	45416741	0.0138	1.25e-06	19_45416741_T_C	14720	C-C motif chemokine 23 levels	0.00159424	0.00163503	24.1037	41.8887	23.5014
rs4719850	T	C	T	C	-0.0548	0.0386369	0.5907	0.6135	kidney cancer	0.3295	0.0396226	GCST90274767	7	3238978	0.0118	3.42e-06	7_3238978_T_C	14726	C-C motif chemokine 23 levels	0.00146263	0.00145211	21.412	41.8887	21.5674
rs536720979	A	G	A	G	0.2618	-0.00119928	0.0138	0.01227	kidney cancer	0.9951	0.195282	GCST90274767	13	46239903	0.0591	9.43e-06	13_46239903_A_G	11760	C-C motif chemokine 23 levels	0.00166612	0.00186558	21.9765	41.8887	19.623
rs55755820	T	G	T	G	-0.1035	0.00279609	0.899	0.8988	kidney cancer	0.9893	0.208494	GCST90274767	1	245606006	0.0228	5.64e-06	1_245606006_T_G	11538	C-C motif chemokine 23 levels	0.00178312	0.00194532	22.485	41.8887	20.6068
rs6497967	T	C	T	C	-0.0547	0.0862117	0.3198	0.318	kidney cancer	0.03552	0.0410067	GCST90274767	16	26890471	0.0123	8.7e-06	16_26890471_T_C	14729	C-C motif chemokine 23 levels	0.00134112	0.00130173	19.1955	41.8887	19.7772
rs712048	A	C	A	C	-0.5147	-0.0748313	0.1497	0.1258	kidney cancer	0.2059	0.0591589	GCST90274767	17	34326215	0.0158	8.99e-233	17_34326215_A_C	14723	C-C motif chemokine 23 levels	0.0672399	0.0674423	1064.62	41.8887	1061.19
rs7225405	T	G	T	G	-0.2256	-0.0723207	0.0643	0.04601	kidney cancer	0.7162	0.198933	GCST90274767	17	34140999	0.0291	9e-15	17_34140999_T_G	11538	C-C motif chemokine 23 levels	0.00518299	0.00612429	71.0852	41.8887	60.1025
rs73071153	A	G	A	G	-0.1497	0.182122	0.0393	0.0317	kidney cancer	0.08379	0.105327	GCST90274767	7	17545964	0.0319	2.7e-06	7_17545964_A_G	14728	C-C motif chemokine 23 levels	0.00149324	0.00169221	24.9617	41.8887	22.0223
rs73114426	A	G	A	G	0.0948	-0.183571	0.0846	0.1033	kidney cancer	0.01686	0.076816	GCST90274767	12	57405049	0.0207	4.66e-06	12_57405049_A_G	14731	C-C motif chemokine 23 levels	0.00142195	0.00139196	20.5308	41.8887	20.9737
rs74491711	A	G	A	G	0.1273	-0.0577971	0.048	0.03885	kidney cancer	0.5688	0.101431	GCST90274767	3	40054358	0.0278	4.67e-06	3_40054358_A_G	14735	C-C motif chemokine 23 levels	0.00142121	0.00148103	21.8524	41.8887	20.9685
rs77083410	C	G	C	G	0.224	-0.125222	0.0223	0.0184	kidney cancer	0.4852	0.17941	GCST90274767	11	115081786	0.0416	7.26e-08	11_115081786_C_G	14734	C-C motif chemokine 23 levels	0.00196424	0.00218795	32.3035	41.8887	28.9941
rs77354000	A	G	A	G	-0.2064	0.0617534	0.9788	0.97137	kidney cancer	0.669	0.144445	GCST90274767	10	34433796	0.0437	2.32e-06	10_34433796_A_G	14735	C-C motif chemokine 23 levels	0.00151185	0.00176799	26.0939	41.8887	22.3078
rs77527696	T	C	T	C	-0.2538	0.240671	0.0298	0.01943	kidney cancer	0.1229	0.156005	GCST90274767	17	34816052	0.0465	4.81e-08	17_34816052_T_C	13829	C-C motif chemokine 23 levels	0.00214988	0.0037247	51.6939	41.8887	29.7905
rs79960240	T	G	T	G	-0.2384	-0.229762	0.0143	0.01431	kidney cancer	0.1859	0.173693	GCST90274767	14	94811056	0.0537	9.02e-06	14_94811056_T_G	14249	C-C motif chemokine 23 levels	0.00138147	0.00160222	22.8635	41.8887	19.709
rs80014265	T	C	T	C	0.1307	-0.0243023	0.0514	0.04908	kidney cancer	0.7959	0.0939557	GCST90274767	9	94180109	0.0289	6.11e-06	9_94180109_T_C	14736	C-C motif chemokine 23 levels	0.00138622	0.00166582	24.5851	41.8887	20.4529
rs10792444	T	C	T	C	-0.0865	0.0730646	0.8838	0.91718	kidney cancer	0.2822	0.0679424	GCST90274768	11	64434151	0.0181	1.76e-06	11_64434151_T_C	14732	C-C motif chemokine 25 levels	0.0015481	0.00153682	22.6722	41.8887	22.8389
rs111437511	T	C	T	C	0.1437	0.113841	0.0428	0.05521	kidney cancer	0.1948	0.0878056	GCST90274768	8	10694001	0.0297	1.31e-06	8_10694001_T_C	14733	C-C motif chemokine 25 levels	0.00158664	0.00169196	24.9665	41.8887	23.41
rs113348389	T	C	T	C	-0.7068	0.0816721	0.9728	0.97546	kidney cancer	0.5541	0.138047	GCST90274768	19	8158245	0.0379	1.28e-77	19_8158245_T_C	14721	C-C motif chemokine 25 levels	0.0230831	0.0264372	399.696	41.8887	347.788
rs143132666	A	C	A	C	-0.1934	-0.0686862	0.0225	0.0184	kidney cancer	0.6474	0.150174	GCST90274768	1	160762078	0.0406	1.9e-06	1_160762078_A_C	14734	C-C motif chemokine 25 levels	0.00153791	0.00164529	24.2783	41.8887	22.6914
rs17683663	T	C	T	C	-0.1198	-0.000699755	0.0745	0.07566	kidney cancer	0.9929	0.0786361	GCST90274768	8	42081422	0.0226	1.15e-07	8_42081422_T_C	14730	C-C motif chemokine 25 levels	0.00190426	0.00197914	29.2066	41.8887	28.0994
rs184092631	A	C	A	C	0.2448	-0.0942008	0.9809	0.98569	kidney cancer	0.5568	0.160314	GCST90274768	19	8276989	0.0466	1.49e-07	19_8276989_A_C	14736	C-C motif chemokine 25 levels	0.00186947	0.00224549	33.1595	41.8887	27.5963
rs2078037	A	C	A	C	0.0662	-0.0463581	0.7599	0.7495	kidney cancer	0.3024	0.0449511	GCST90274768	18	2519969	0.0136	1.13e-06	18_2519969_A_C	14712	C-C motif chemokine 25 levels	0.00160815	0.00159917	23.5615	41.8887	23.694
rs2287936	A	G	A	G	0.7276	0.0546674	0.1067	0.09816	kidney cancer	0.428	0.0689706	GCST90274768	19	8127331	0.0191	1e-300	19_8127331_A_G	14288	C-C motif chemokine 25 levels	0.092213	0.10092	1603.58	41.8887	1451.17
rs485073	A	G	A	G	0.3098	-0.03335	0.5286	0.5348	kidney cancer	0.3952	0.0392249	GCST90274768	19	49207255	0.0113	1.77e-165	19_49207255_A_G	14735	C-C motif chemokine 25 levels	0.0485406	0.047831	740.094	41.8887	751.633
rs549735081	T	C	T	C	-0.4672	-0.00420885	0.9355	0.94172	kidney cancer	0.9628	0.0902407	GCST90274768	19	8123295	0.028	1.67e-62	19_8123295_T_C	11327	C-C motif chemokine 25 levels	0.0239941	0.0263414	306.387	41.8887	278.413
rs635634	T	C	T	C	-0.2482	0.0231663	0.1875	0.1861	kidney cancer	0.6403	0.0495769	GCST90274768	9	136155000	0.0166	1.52e-50	9_136155000_T_C	11785	C-C motif chemokine 25 levels	0.0186195	0.0187697	225.394	41.8887	223.557
rs7137942	A	G	A	G	-0.0637	0.0753857	0.6502	0.6544	kidney cancer	0.4554	0.100993	GCST90274768	12	81177765	0.0133	1.67e-06	12_81177765_A_G	12404	C-C motif chemokine 25 levels	0.00184621	0.00184576	22.9335	41.8887	22.9391
rs7296588	A	G	A	G	-0.1159	-0.066781	0.4365	0.4489	kidney cancer	0.09108	0.0395218	GCST90274768	12	578100	0.0116	1.66e-23	12_578100_A_G	14725	C-C motif chemokine 25 levels	0.00673472	0.00660808	97.9379	41.8887	99.8277
rs72995492	A	T	A	T	0.2394	-0.109661	0.0243	0.02249	kidney cancer	0.5065	0.165079	GCST90274768	19	8260355	0.042	1.2e-08	19_8260355_A_T	14716	C-C motif chemokine 25 levels	0.00220324	0.0027177	40.0971	41.8887	32.49
rs851850	A	G	A	G	-0.0777	0.128393	0.846	0.8661	kidney cancer	0.02775	0.0583393	GCST90274768	6	67085077	0.0163	1.87e-06	6_67085077_A_G	14288	C-C motif chemokine 25 levels	0.00158806	0.00157313	22.5091	41.8887	22.7231
rs112641086	T	C	T	C	-0.1056	0.0540339	0.0895	0.1002	kidney cancer	0.43	0.0684674	GCST90274769	2	207076122	0.0198	9.64e-08	2_207076122_T_C	14731	C-C motif chemokine 28 levels	0.00192746	0.00181744	26.8179	41.8887	28.4444
rs116782490	A	C	A	C	0.2298	-0.0534008	0.9815	0.98262	kidney cancer	0.7405	0.161238	GCST90274769	5	84924989	0.0488	2.49e-06	5_84924989_A_C	12633	C-C motif chemokine 28 levels	0.00175251	0.00191775	24.2696	41.8887	22.1748
rs11754249	A	G	A	G	0.0934	-0.0414298	0.1058	0.1053	kidney cancer	0.5066	0.062381	GCST90274769	6	145107700	0.0205	5.21e-06	6_145107700_A_G	11779	C-C motif chemokine 28 levels	0.00175949	0.00165061	19.4714	41.8887	20.758
rs118111688	A	T	A	T	0.1874	-0.104916	0.9776	0.98057	kidney cancer	0.4447	0.137274	GCST90274769	7	12554637	0.0424	9.88e-06	7_12554637_A_T	13374	C-C motif chemokine 28 levels	0.00145874	0.00153808	20.5989	41.8887	19.5347
rs12589600	A	G	A	G	0.051	-0.0569937	0.5556	0.5399	kidney cancer	0.1441	0.0390183	GCST90274769	14	86936828	0.0114	7.69e-06	14_86936828_A_G	14711	C-C motif chemokine 28 levels	0.00135881	0.00128442	18.9168	41.8887	20.0139
rs139902	A	C	A	C	0.0684	0.07139	0.3659	0.3681	kidney cancer	0.07617	0.040257	GCST90274769	22	38406782	0.0121	1.58e-08	22_38406782_A_C	14285	C-C motif chemokine 28 levels	0.00223229	0.00217101	31.076	41.8887	31.9552
rs140404587	T	G	T	G	-0.2617	-0.713146	0.0119	0.01125	kidney cancer	0.02309	0.313893	GCST90274769	12	106453419	0.0587	8.26e-06	12_106453419_T_G	14241	C-C motif chemokine 28 levels	0.00139395	0.00161059	22.9702	41.8887	19.8761
rs143400203	T	C	T	C	0.1812	-0.0955829	0.0244	0.02352	kidney cancer	0.5304	0.152349	GCST90274769	7	115560778	0.0392	3.79e-06	7_115560778_T_C	14722	C-C motif chemokine 28 levels	0.00144946	0.00156318	23.046	41.8887	21.367
rs150193318	A	G	A	G	0.2249	0.118896	0.0212	0.01227	kidney cancer	0.4817	0.16899	GCST90274769	19	31385455	0.0501	7.16e-06	19_31385455_A_G	14286	C-C motif chemokine 28 levels	0.00140877	0.00209913	30.047	41.8887	20.1513
rs1514964	T	C	T	C	-0.1263	0.0148886	0.9486	0.95092	kidney cancer	0.8776	0.0966716	GCST90274769	1	64836646	0.0264	1.72e-06	1_64836646_T_C	14734	C-C motif chemokine 28 levels	0.00155118	0.00155555	22.952	41.8887	22.8875
rs17098842	A	G	A	G	0.1458	-0.0686001	0.9674	0.96728	kidney cancer	0.499	0.10147	GCST90274769	1	76835048	0.0321	5.57e-06	1_76835048_A_G	14732	C-C motif chemokine 28 levels	0.0013986	0.00134081	19.7767	41.8887	20.6303
rs2477954	T	C	T	C	-0.058	0.122306	0.6211	0.6319	kidney cancer	0.002702	0.0407721	GCST90274769	10	90264140	0.012	1.34e-06	10_90264140_T_C	14286	C-C motif chemokine 28 levels	0.0016328	0.00158333	22.6522	41.8887	23.3611
rs2631360	A	G	A	G	0.0597	0.0569937	0.5481	0.5532	kidney cancer	0.1431	0.038921	GCST90274769	5	131707429	0.0128	3.1e-06	5_131707429_A_G	11780	C-C motif chemokine 28 levels	0.00184355	0.00176555	20.8315	41.8887	21.7535
rs28384995	A	T	A	T	-0.0866	0.153236	0.8668	0.8538	kidney cancer	0.3364	0.159405	GCST90274769	15	91295829	0.0194	8.05e-06	15_91295829_A_T	14286	C-C motif chemokine 28 levels	0.00139308	0.00173176	24.7794	41.8887	19.9266
rs2866626	C	G	C	G	-0.0597	0.0155198	0.6079	0.5971	kidney cancer	0.703	0.0407051	GCST90274769	4	102569209	0.0121	8.06e-07	4_102569209_C_G	14285	C-C motif chemokine 28 levels	0.00170145	0.00169906	24.3089	41.8887	24.3432
rs3823797	A	G	A	G	-0.058	0.0524027	0.7423	0.7536	kidney cancer	0.2607	0.046591	GCST90274769	7	77694740	0.0128	5.86e-06	7_77694740_A_G	14732	C-C motif chemokine 28 levels	0.00139196	0.001287	18.982	41.8887	20.5322
rs4346241	A	G	A	G	0.0907	0.0351741	0.9021	0.8926	kidney cancer	0.6081	0.0685939	GCST90274769	17	8580609	0.0204	8.75e-06	17_8580609_A_G	14286	C-C motif chemokine 28 levels	0.00138199	0.00145305	20.7856	41.8887	19.7676
rs4866742	T	C	T	C	0.0702	-0.0824038	0.4126	0.3732	kidney cancer	0.04309	0.0407368	GCST90274769	5	43405459	0.0122	8.71e-09	5_43405459_T_C	12829	C-C motif chemokine 28 levels	0.0025746	0.00238873	30.7136	41.8887	33.1096
rs546951873	A	G	A	G	0.3427	-0.455144	0.0122	0.01227	kidney cancer	0.06933	0.250594	GCST90274769	12	55558442	0.0672	3.4e-07	12_55558442_A_G	11273	C-C motif chemokine 28 levels	0.00230211	0.00283066	31.9949	41.8887	26.007
rs6580980	A	G	A	G	-0.0688	0.00886063	0.4015	0.4427	kidney cancer	0.8208	0.039117	GCST90274769	12	54692061	0.0118	5.53e-09	12_54692061_A_G	14285	C-C motif chemokine 28 levels	0.00237444	0.00227487	32.5661	41.8887	33.9948
rs6671688	T	C	T	C	0.0534	-0.0371828	0.5411	0.5481	kidney cancer	0.3447	0.0393502	GCST90274769	1	154994265	0.0116	4.16e-06	1_154994265_T_C	14286	C-C motif chemokine 28 levels	0.0014814	0.00141615	20.2569	41.8887	21.1917
rs71363004	C	G	C	G	0.2181	-0.182962	0.9802	0.97342	kidney cancer	0.1261	0.119609	GCST90274769	18	74179338	0.0466	2.87e-06	18_74179338_C_G	11982	C-C motif chemokine 28 levels	0.00182511	0.00184638	22.1606	41.8887	21.9048
rs73000929	A	G	A	G	-0.1935	-0.0284903	0.0347	0.02045	kidney cancer	0.7962	0.110313	GCST90274769	11	113953622	0.0355	5.02e-08	11_113953622_A_G	14734	C-C motif chemokine 28 levels	0.00201265	0.00250832	37.0456	41.8887	29.7102
rs74855027	T	C	T	C	0.1215	-0.0775164	0.0639	0.06544	kidney cancer	0.3817	0.0886137	GCST90274769	2	225265371	0.0271	7.35e-06	2_225265371_T_C	14286	C-C motif chemokine 28 levels	0.00140525	0.00176606	25.271	41.8887	20.1008
rs76291845	A	G	A	G	0.2696	-0.0747235	0.9859	0.98671	kidney cancer	0.6399	0.159721	GCST90274769	2	111889358	0.0542	6.55e-07	2_111889358_A_G	14244	C-C motif chemokine 28 levels	0.00173427	0.00202079	28.8384	41.8887	24.7424
rs7661151	T	C	T	C	0.0531	0.0287818	0.6323	0.635	kidney cancer	0.4751	0.040299	GCST90274769	4	157065076	0.0116	4.7e-06	4_157065076_T_C	14730	C-C motif chemokine 28 levels	0.00142073	0.0013111	19.3352	41.8887	20.9543
rs76669782	A	C	A	C	-0.2853	0.251672	0.0176	0.01125	kidney cancer	0.4628	0.342763	GCST90274769	9	90419900	0.0513	2.68e-08	9_90419900_A_C	12933	C-C motif chemokine 28 levels	0.00238616	0.00281472	36.4998	41.8887	30.9292
rs76679915	T	C	T	C	0.0624	-0.284354	0.7035	0.6953	kidney cancer	0.0009066	0.0857002	GCST90274769	4	125828318	0.0137	5.24e-06	4_125828318_T_C	11962	C-C motif chemokine 28 levels	0.00173159	0.00162438	19.4592	41.8887	20.7457
rs77569365	T	G	T	G	0.129	0.0597772	0.9561	0.96421	kidney cancer	0.5429	0.0982477	GCST90274769	13	106647340	0.0282	4.77e-06	13_106647340_T_G	14734	C-C motif chemokine 28 levels	0.00141841	0.00139694	20.6085	41.8887	20.9258
rs78552613	T	C	T	C	-0.1844	-0.0941277	0.0271	0.02556	kidney cancer	0.4704	0.130402	GCST90274769	10	105492625	0.0395	3.04e-06	10_105492625_T_C	14734	C-C motif chemokine 28 levels	0.00147715	0.00179304	26.4625	41.8887	21.7935
rs78843608	A	G	A	G	-0.1684	0.0316971	0.0376	0.03885	kidney cancer	0.7464	0.0980151	GCST90274769	5	102824347	0.0323	1.85e-07	5_102824347_A_G	14725	C-C motif chemokine 28 levels	0.00184282	0.00205238	30.2793	41.8887	27.1819
rs79205279	A	G	A	G	0.1063	0.0544562	0.0645	0.06748	kidney cancer	0.4953	0.0798591	GCST90274769	3	124901642	0.024	9.46e-06	3_124901642_A_G	13854	C-C motif chemokine 28 levels	0.00141422	0.00136364	18.9149	41.8887	19.6175
rs7958187	A	G	A	G	-0.055	0.00451016	0.3872	0.3947	kidney cancer	0.9105	0.0401231	GCST90274769	12	69466941	0.0122	6.54e-06	12_69466941_A_G	13420	C-C motif chemokine 28 levels	0.00151238	0.00143552	19.2895	41.8887	20.3238
rs79683119	A	C	A	C	0.159	-0.0193123	0.0266	0.03067	kidney cancer	0.8796	0.127494	GCST90274769	2	56679291	0.0358	8.94e-06	2_56679291_A_C	14734	C-C motif chemokine 28 levels	0.00133717	0.00130917	19.312	41.8887	19.7255
rs801520	A	C	A	C	0.0779	-0.040566	0.1364	0.1033	kidney cancer	0.5364	0.0656125	GCST90274769	7	18702222	0.0171	5.22e-06	7_18702222_A_C	14732	C-C motif chemokine 28 levels	0.00140692	0.00142966	21.089	41.8887	20.7531
rs10990301	A	T	A	T	0.085	0.0636319	0.8839	0.8947	kidney cancer	0.3316	0.0655393	GCST90274770	9	105528047	0.0186	4.88e-06	9_105528047_A_T	14296	C-C motif chemokine 4 levels	0.00145889	0.00148287	21.2276	41.8887	20.8839
rs111476793	A	G	A	G	0.0869	0.0329365	0.1344	0.1564	kidney cancer	0.565	0.057238	GCST90274770	4	53951496	0.019	4.79e-06	4_53951496_A_G	12800	C-C motif chemokine 4 levels	0.00163185	0.00175706	22.5264	41.8887	20.9186
rs112315344	T	G	T	G	0.2123	0.0404054	0.0284	0.01943	kidney cancer	0.773	0.140076	GCST90274770	5	33775793	0.0455	3.07e-06	5_33775793_T_G	14255	C-C motif chemokine 4 levels	0.00152513	0.00248734	35.5405	41.8887	21.7709
rs112356872	T	C	T	C	-0.2165	0.348118	0.9805	0.98466	kidney cancer	0.05865	0.184111	GCST90274770	7	22212109	0.0478	5.92e-06	7_22212109_T_C	14743	C-C motif chemokine 4 levels	0.00138973	0.00179237	26.4688	41.8887	20.5145
rs112846979	T	C	T	C	-0.188	-0.0343048	0.0228	0.02249	kidney cancer	0.7961	0.13276	GCST90274770	3	190832842	0.0414	5.6e-06	3_190832842_T_C	14296	C-C motif chemokine 4 levels	0.00144057	0.00157494	22.5477	41.8887	20.6213
rs113010081	T	C	T	C	-0.5767	0.167969	0.8759	0.8906	kidney cancer	0.011	0.0660594	GCST90274770	3	46457412	0.0184	1.24e-215	3_46457412_T_C	14296	C-C motif chemokine 4 levels	0.064305	0.072303	1114.05	41.8887	982.345
rs1161092	A	G	A	G	-0.0635	-0.034981	0.6742	0.6871	kidney cancer	0.4018	0.0417229	GCST90274770	12	67722012	0.0125	3.77e-07	12_67722012_A_G	14296	C-C motif chemokine 4 levels	0.00180215	0.0017714	25.3654	41.8887	25.8064
rs116193969	A	T	A	T	0.2915	-0.265666	0.0134	0.01534	kidney cancer	0.2654	0.23854	GCST90274770	2	236974412	0.0617	2.31e-06	2_236974412_A_T	14296	C-C motif chemokine 4 levels	0.00155911	0.00224674	32.1872	41.8887	22.3206
rs11619402	A	G	A	G	0.0672	-0.0742926	0.7907	0.7843	kidney cancer	0.1121	0.0467595	GCST90274770	13	43555687	0.015	7.46e-06	13_43555687_A_G	14296	C-C motif chemokine 4 levels	0.00140215	0.00149468	21.397	41.8887	20.0704
rs116309267	C	G	C	G	0.1956	-0.0242047	0.0299	0.02761	kidney cancer	0.8393	0.119359	GCST90274770	3	756117	0.0405	1.37e-06	3_756117_C_G	14723	C-C motif chemokine 4 levels	0.00158199	0.0022195	32.746	41.8887	23.3253
rs13100427	A	G	A	G	0.0533	-0.0018982	0.56	0.544	kidney cancer	0.9603	0.0381339	GCST90274770	3	22458640	0.012	8.93e-06	3_22458640_A_G	14296	C-C motif chemokine 4 levels	0.00137828	0.00139999	20.0395	41.8887	19.7284
rs137896358	T	C	T	C	0.2797	-0.0777015	0.0186	0.01534	kidney cancer	0.6256	0.159248	GCST90274770	19	18917908	0.0551	3.85e-07	19_18917908_T_C	12745	C-C motif chemokine 4 levels	0.00201805	0.0028561	36.4996	41.8887	25.7681
rs140505982	T	C	T	C	-0.2294	0.0598562	0.0248	0.02352	kidney cancer	0.6207	0.120956	GCST90274770	3	46459749	0.0415	3.24e-08	3_46459749_T_C	13865	C-C motif chemokine 4 levels	0.00219926	0.00254544	35.3774	41.8887	30.5556
rs143922263	A	G	A	G	0.2198	-0.203675	0.0203	0.01636	kidney cancer	0.1758	0.150447	GCST90274770	2	162240222	0.0497	9.75e-06	2_162240222_A_G	14296	C-C motif chemokine 4 levels	0.00136645	0.00192165	27.521	41.8887	19.5588
rs143960014	A	G	A	G	0.1953	-0.174625	0.0228	0.02045	kidney cancer	0.1902	0.133303	GCST90274770	12	52285090	0.0416	2.67e-06	12_52285090_A_G	14257	C-C motif chemokine 4 levels	0.00154376	0.00169962	24.2694	41.8887	22.0403
rs148518028	T	C	T	C	0.1989	-0.203186	0.0317	0.01125	kidney cancer	0.3693	0.226319	GCST90274770	2	79469060	0.044	6.17e-06	2_79469060_T_C	14296	C-C motif chemokine 4 levels	0.00142755	0.00242867	34.7999	41.8887	20.4345
rs1634503	A	G	A	G	-0.0745	-0.0732505	0.2416	0.2556	kidney cancer	0.1162	0.0466289	GCST90274770	17	34421139	0.0138	6.72e-08	17_34421139_A_G	14295	C-C motif chemokine 4 levels	0.00203491	0.00203394	29.1303	41.8887	29.1443
rs17692864	T	C	T	C	0.2321	-0.0970617	0.9406	0.94785	kidney cancer	0.2325	0.0812951	GCST90274770	17	34945214	0.0283	2.38e-16	17_34945214_T_C	13662	C-C motif chemokine 4 levels	0.00489997	0.00601966	82.7265	41.8887	67.2632
rs17792183	T	C	T	C	0.0763	0.0100493	0.8565	0.8507	kidney cancer	0.8595	0.0567725	GCST90274770	6	22899548	0.017	7.18e-06	6_22899548_T_C	14296	C-C motif chemokine 4 levels	0.0014073	0.00143106	20.4849	41.8887	20.1443
rs183450854	C	G	C	G	0.2133	0.0656005	0.9802	0.98875	kidney cancer	0.6794	0.15873	GCST90274770	20	50372747	0.0475	7.1e-06	20_50372747_C_G	14737	C-C motif chemokine 4 levels	0.00136663	0.001766	26.0681	41.8887	20.1648
rs3860989	A	C	A	C	-0.0631	0.00139902	0.6988	0.6912	kidney cancer	0.9776	0.0498264	GCST90274770	9	33460141	0.0142	8.84e-06	9_33460141_A_C	11984	C-C motif chemokine 4 levels	0.00164527	0.00167609	20.1166	41.8887	19.7461
rs42279	T	C	T	C	0.0743	-0.084525	0.1598	0.1319	kidney cancer	0.1365	0.0567681	GCST90274770	5	11317698	0.0162	4.51e-06	5_11317698_T_C	14738	C-C motif chemokine 4 levels	0.00142544	0.00148241	21.8772	41.8887	21.0352
rs56131468	A	G	A	G	0.0833	-0.0355602	0.1323	0.1493	kidney cancer	0.5548	0.060212	GCST90274770	10	132716137	0.0178	2.87e-06	10_132716137_A_G	14296	C-C motif chemokine 4 levels	0.00152979	0.00159312	22.8084	41.8887	21.9003
rs5743614	T	C	T	C	0.0728	0.0502412	0.2565	0.274	kidney cancer	0.5741	0.0893934	GCST90274770	4	38798935	0.0143	3.56e-07	4_38798935_T_C	12859	C-C motif chemokine 4 levels	0.00201176	0.00202144	26.0423	41.8887	25.9174
rs6100282	A	G	A	G	-0.0715	-0.00488803	0.198	0.1697	kidney cancer	0.9233	0.0507701	GCST90274770	20	57507885	0.0159	6.9e-06	20_57507885_A_G	12799	C-C motif chemokine 4 levels	0.0015777	0.00162361	20.8111	41.8887	20.2217
rs66822987	T	C	T	C	0.0648	-0.00279609	0.2289	0.2495	kidney cancer	0.9533	0.0477448	GCST90274770	3	63106417	0.0146	9.06e-06	3_63106417_T_C	14296	C-C motif chemokine 4 levels	0.00137623	0.0014823	21.2195	41.8887	19.699
rs72800563	T	G	T	G	-0.1765	-0.0368715	0.9693	0.97546	kidney cancer	0.7581	0.119722	GCST90274770	16	79338459	0.0374	2.37e-06	16_79338459_T_G	14741	C-C motif chemokine 4 levels	0.00150877	0.00185403	27.3773	41.8887	22.2713
rs78044056	A	G	A	G	-0.2607	0.317317	0.0138	0.01943	kidney cancer	0.03733	0.1524	GCST90274770	4	157055604	0.0552	2.33e-06	4_157055604_A_G	13809	C-C motif chemokine 4 levels	0.00161289	0.00184993	25.5894	41.8887	22.3051
rs8064426	A	G	A	G	-0.4104	-0.111899	0.1459	0.18	kidney cancer	0.1135	0.0707034	GCST90274770	17	34819750	0.0173	2.11e-124	17_34819750_A_G	14295	C-C motif chemokine 4 levels	0.0378815	0.0419767	626.262	41.8887	562.759
rs9818901	A	T	A	T	-0.1185	0.0862694	0.9445	0.94479	kidney cancer	0.3645	0.0951336	GCST90274770	3	152777012	0.0265	7.76e-06	3_152777012_A_T	14742	C-C motif chemokine 4 levels	0.00135475	0.00147218	21.732	41.8887	19.9961
rs10903115	A	G	A	G	-0.0559	0.0441126	0.4429	0.411	kidney cancer	0.3263	0.0449397	GCST90274771	1	25261696	0.0122	4.61e-06	1_25261696_A_G	14286	Natural killer cell receptor 2B4 levels	0.00146763	0.00154203	22.0604	41.8887	20.9944
rs10992054	T	C	T	C	-0.3705	-0.00762903	0.9873	0.97955	kidney cancer	0.9675	0.187243	GCST90274771	9	92856642	0.0763	1.2e-06	9_92856642_T_C	12304	Natural killer cell receptor 2B4 levels	0.00191302	0.00344238	42.4945	41.8887	23.5791
rs11020961	A	G	A	G	0.0768	-0.0107577	0.8167	0.8067	kidney cancer	0.8355	0.051806	GCST90274771	11	94575608	0.0161	1.84e-06	11_94575608_A_G	14287	Natural killer cell receptor 2B4 levels	0.00159037	0.00176595	25.2712	41.8887	22.7547
rs11220506	A	G	A	G	-0.0702	0.0733237	0.1876	0.1738	kidney cancer	0.1442	0.0502104	GCST90274771	11	126335329	0.0147	1.79e-06	11_126335329_A_G	14729	Natural killer cell receptor 2B4 levels	0.00154616	0.00150213	22.1551	41.8887	22.8055
rs11265488	A	G	A	G	-0.0624	0.0139975	0.4675	0.4796	kidney cancer	0.7191	0.0389185	GCST90274771	1	160773957	0.0118	1.24e-07	1_160773957_A_G	14287	Natural killer cell receptor 2B4 levels	0.00195378	0.00193865	27.7475	41.8887	27.9644
rs11265493	A	G	A	G	0.2122	0.0330479	0.4066	0.3988	kidney cancer	0.4074	0.0398899	GCST90274771	1	160803802	0.0119	3.99e-71	1_160803802_A_G	14287	Natural killer cell receptor 2B4 levels	0.0217749	0.0217288	317.29	41.8887	317.978
rs113798825	T	C	T	C	-0.3154	0.0289761	0.9868	0.98262	kidney cancer	0.8904	0.210279	GCST90274771	1	233431752	0.0695	5.68e-06	1_233431752_T_C	11273	Natural killer cell receptor 2B4 levels	0.00182389	0.00259153	29.285	41.8887	20.5946
rs114344979	T	C	T	C	0.1066	0.0299439	0.0652	0.0726	kidney cancer	0.6936	0.0760046	GCST90274771	2	49094515	0.024	8.93e-06	2_49094515_T_C	14724	Natural killer cell receptor 2B4 levels	0.00133827	0.00138519	20.4211	41.8887	19.7284
rs114758826	A	G	A	G	-0.1804	0.191645	0.0393	0.0317	kidney cancer	0.06645	0.104417	GCST90274771	4	174530615	0.0337	8.65e-08	4_174530615_A_G	14728	Natural killer cell receptor 2B4 levels	0.00194216	0.00245744	36.2775	41.8887	28.6558
rs139924614	A	G	A	G	0.1618	-0.225396	0.9666	0.96319	kidney cancer	0.01911	0.0961843	GCST90274771	22	17214005	0.0348	3.33e-06	22_17214005_A_G	14725	Natural killer cell receptor 2B4 levels	0.00146611	0.00169036	24.9294	41.8887	21.6172
rs140189694	A	T	A	T	0.2783	-0.00883895	0.9887	0.98875	kidney cancer	0.959	0.171935	GCST90274771	5	113042679	0.0621	7.41e-06	5_113042679_A_T	12934	Natural killer cell receptor 2B4 levels	0.00155061	0.00173061	22.4191	41.8887	20.0837
rs1434219	T	C	T	C	-0.0589	-0.00149888	0.4388	0.4305	kidney cancer	0.9857	0.083627	GCST90274771	2	79554556	0.0123	1.68e-06	2_79554556_T_C	14287	Natural killer cell receptor 2B4 levels	0.00160267	0.00170862	24.4494	41.8887	22.9309
rs145175118	T	C	T	C	0.2308	-0.00984834	0.9818	0.98978	kidney cancer	0.9538	0.169988	GCST90274771	8	92927069	0.052	9.06e-06	8_92927069_T_C	14287	Natural killer cell receptor 2B4 levels	0.00137717	0.00190369	27.2461	41.8887	19.6999
rs147033439	A	G	A	G	0.2053	-0.170924	0.0249	0.02454	kidney cancer	0.2049	0.134828	GCST90274771	1	88677329	0.0411	5.88e-07	1_88677329_A_G	14731	Natural killer cell receptor 2B4 levels	0.00169116	0.00204671	30.2078	41.8887	24.9514
rs148214660	A	G	A	G	-0.2705	-0.214627	0.0131	0.01329	kidney cancer	0.329	0.219876	GCST90274771	3	112589458	0.0612	9.87e-06	3_112589458_A_G	14287	Natural killer cell receptor 2B4 levels	0.00136571	0.00189195	27.0777	41.8887	19.5358
rs149212182	T	C	T	C	0.2642	-0.169152	0.0173	0.01431	kidney cancer	0.3869	0.195494	GCST90274771	20	60283624	0.059	7.54e-06	20_60283624_T_C	12321	Natural killer cell receptor 2B4 levels	0.0016251	0.00237336	29.3069	41.8887	20.0522
rs149458216	A	C	A	C	-0.2146	-0.122041	0.0182	0.01125	kidney cancer	0.4565	0.163896	GCST90274771	16	48902293	0.047	4.97e-06	16_48902293_A_C	14725	Natural killer cell receptor 2B4 levels	0.00141401	0.00164583	24.2714	41.8887	20.848
rs1574847	C	G	C	G	-0.0637	-0.00803217	0.2366	0.2198	kidney cancer	0.8628	0.0464795	GCST90274771	4	27611759	0.0139	4.59e-06	4_27611759_C_G	14287	Natural killer cell receptor 2B4 levels	0.00146802	0.0014658	20.9697	41.8887	21.0014
rs2554697	A	G	A	G	0.0627	-0.0613436	0.6347	0.6493	kidney cancer	0.1293	0.040441	GCST90274771	8	3921805	0.0134	2.88e-06	8_3921805_A_G	11782	Natural killer cell receptor 2B4 levels	0.00185513	0.00182299	21.514	41.8887	21.894
rs3184504	T	C	T	C	0.116	-0.0321101	0.4764	0.4663	kidney cancer	0.4077	0.0387827	GCST90274771	12	111884608	0.0128	1.27e-19	12_111884608_T_C	11784	Natural killer cell receptor 2B4 levels	0.00692246	0.00671301	79.6272	41.8887	82.1289
rs34826779	T	G	T	G	0.063	0.0133892	0.248	0.2822	kidney cancer	0.7604	0.0439055	GCST90274771	8	106570964	0.0138	4.99e-06	8_106570964_T_G	14287	Natural killer cell receptor 2B4 levels	0.00145683	0.0014804	21.1789	41.8887	20.8412
rs3828139	T	C	T	C	0.0744	-0.0439212	0.4677	0.4877	kidney cancer	0.2613	0.0390993	GCST90274771	1	44253015	0.0119	4.05e-10	1_44253015_T_C	14286	Natural killer cell receptor 2B4 levels	0.00272907	0.00275613	39.4774	41.8887	39.0888
rs4672486	A	G	A	G	0.0661	-0.0759096	0.4329	0.4274	kidney cancer	0.05564	0.0396634	GCST90274771	2	62495209	0.0117	1.61e-08	2_62495209_A_G	14720	Natural killer cell receptor 2B4 levels	0.00216392	0.00214526	31.6418	41.8887	31.9177
rs56272634	T	C	T	C	0.0704	-0.0661398	0.6994	0.7045	kidney cancer	0.111	0.0415004	GCST90274771	2	111846068	0.0126	2.31e-08	2_111846068_T_C	14729	Natural killer cell receptor 2B4 levels	0.00211529	0.00208396	30.7546	41.8887	31.2179
rs60006581	A	G	A	G	0.0905	-0.124317	0.9052	0.8988	kidney cancer	0.05103	0.0637121	GCST90274771	21	38144075	0.0203	8.27e-06	21_38144075_A_G	14724	Natural killer cell receptor 2B4 levels	0.00134819	0.00140566	20.7232	41.8887	19.8749
rs61865960	T	C	T	C	0.2604	-0.553907	0.9697	0.98466	kidney cancer	0.08298	0.319503	GCST90274771	10	95662408	0.0584	8.24e-06	10_95662408_T_C	11810	Natural killer cell receptor 2B4 levels	0.00168093	0.00398467	47.2392	41.8887	19.8818
rs6928352	A	G	A	G	-0.1074	-0.0361454	0.0794	0.06851	kidney cancer	0.6288	0.0747708	GCST90274771	6	614064	0.0215	5.87e-07	6_614064_A_G	14731	Natural killer cell receptor 2B4 levels	0.00169131	0.00168628	24.8792	41.8887	24.9535
rs72756898	C	G	C	G	0.2056	0.00742752	0.0192	0.01636	kidney cancer	0.9605	0.149972	GCST90274771	5	64185695	0.0454	5.94e-06	5_64185695_C_G	14734	Natural killer cell receptor 2B4 levels	0.00139017	0.00159205	23.4915	41.8887	20.5085
rs72837690	T	C	T	C	-0.0776	-0.0308717	0.6405	0.6697	kidney cancer	0.4511	0.0409665	GCST90274771	17	7088423	0.0125	5.37e-10	17_7088423_T_C	14287	Natural killer cell receptor 2B4 levels	0.00269062	0.00277314	39.7244	41.8887	38.5393
rs73173072	A	T	A	T	0.1576	-0.0215301	0.9675	0.9683	kidney cancer	0.8664	0.127978	GCST90274771	3	167513752	0.0353	8.02e-06	3_167513752_A_T	14718	Natural killer cell receptor 2B4 levels	0.00135265	0.00156198	23.0221	41.8887	19.9326
rs78142752	T	C	T	C	0.2288	0.0448928	0.0184	0.01227	kidney cancer	0.8342	0.214472	GCST90274771	5	96078542	0.0497	4.15e-06	5_96078542_T_C	14734	Natural killer cell receptor 2B4 levels	0.00143652	0.00189101	27.9112	41.8887	21.1933
rs1081489	A	G	A	G	-0.0789	-0.0115666	0.8552	0.865	kidney cancer	0.8613	0.0662012	GCST90274772	10	84407842	0.0176	7.36e-06	10_84407842_A_G	12196	CD40L receptor levels	0.00164538	0.00154177	18.8294	41.8887	20.0969
rs117191103	T	C	T	C	0.3553	0.112945	0.0208	0.02658	kidney cancer	0.3915	0.131806	GCST90274772	20	44464356	0.0437	4.28e-16	20_44464356_T_C	14736	CD40L receptor levels	0.00446645	0.00514227	76.1579	41.8887	66.104
rs11755766	T	C	T	C	-0.0504	-0.0384512	0.5049	0.5102	kidney cancer	0.3302	0.0394893	GCST90274772	6	10178951	0.0112	6.8e-06	6_10178951_T_C	14735	CD40L receptor levels	0.00137258	0.00126996	18.7341	41.8887	20.25
rs12152184	A	G	A	G	0.1085	0.0373921	0.8849	0.8753	kidney cancer	0.6133	0.0739898	GCST90274772	22	45002809	0.0205	1.21e-07	22_45002809_A_G	12402	CD40L receptor levels	0.00225398	0.00239805	29.8074	41.8887	28.0125
rs12500563	T	G	T	G	0.3143	0.379463	0.9875	0.98773	kidney cancer	0.4529	0.505554	GCST90274772	4	7304426	0.0687	4.76e-06	4_7304426_T_G	10795	CD40L receptor levels	0.00193549	0.00243874	26.3857	41.8887	20.9303
rs138739860	T	G	T	G	0.1632	-0.164757	0.9648	0.95501	kidney cancer	0.1012	0.100519	GCST90274772	21	18103398	0.0351	3.33e-06	21_18103398_T_G	11979	CD40L receptor levels	0.00180175	0.00180905	21.7062	41.8887	21.6185
rs138897138	A	G	A	G	0.109	0.0399896	0.914	0.9274	kidney cancer	0.5595	0.0685242	GCST90274772	2	122731427	0.0216	4.5e-07	2_122731427_A_G	14288	CD40L receptor levels	0.00177935	0.00186779	26.7332	41.8887	25.4651
rs144949926	A	G	A	G	-0.2655	-0.0778534	0.9784	0.98875	kidney cancer	0.8397	0.384885	GCST90274772	3	20921481	0.0591	7.04e-06	3_20921481_A_G	14288	CD40L receptor levels	0.00141069	0.0029794	42.6909	41.8887	20.1815
rs149900704	A	G	A	G	-0.1956	-0.151433	0.0203	0.01431	kidney cancer	0.3312	0.155843	GCST90274772	8	111799116	0.0442	9.63e-06	8_111799116_A_G	14732	CD40L receptor levels	0.00132774	0.0015218	22.4502	41.8887	19.5836
rs17372980	T	C	T	C	-0.0611	0.040758	0.7421	0.7526	kidney cancer	0.3584	0.0443785	GCST90274772	1	59140291	0.0134	5.12e-06	1_59140291_T_C	14288	CD40L receptor levels	0.00145322	0.00142898	20.4436	41.8887	20.7909
rs1883832	T	C	T	C	-0.4519	-0.0610247	0.2575	0.2597	kidney cancer	0.1816	0.0456825	GCST90274772	20	44746982	0.0126	1.07e-281	20_44746982_T_C	14736	CD40L receptor levels	0.0802921	0.0780887	1248.02	41.8887	1286.3
rs34755276	A	G	A	G	0.0587	0.0234734	0.3475	0.3661	kidney cancer	0.5656	0.0408557	GCST90274772	19	57755822	0.0131	7.43e-06	19_57755822_A_G	12403	CD40L receptor levels	0.00161649	0.00156258	19.4078	41.8887	20.0786
rs35864161	T	G	T	G	-0.1269	0.0942187	0.9543	0.95808	kidney cancer	0.3211	0.0949594	GCST90274772	17	66365155	0.0284	7.88e-06	17_66365155_T_G	14735	CD40L receptor levels	0.00135334	0.0014046	20.7232	41.8887	19.9658
rs3967170	A	G	A	G	0.0789	-0.0339182	0.1353	0.1115	kidney cancer	0.5773	0.0608581	GCST90274772	3	3773438	0.017	3.46e-06	3_3773438_A_G	14721	CD40L receptor levels	0.00146131	0.00145662	21.4713	41.8887	21.5405
rs404842	A	G	A	G	-0.0599	-0.0390527	0.6433	0.681	kidney cancer	0.3431	0.0411923	GCST90274772	16	84304113	0.0123	1.12e-06	16_84304113_A_G	14287	CD40L receptor levels	0.00165746	0.00164665	23.5611	41.8887	23.7161
rs4278412	C	G	C	G	0.1978	0.226418	0.0203	0.0317	kidney cancer	0.06668	0.123468	GCST90274772	1	211450157	0.0413	1.67e-06	1_211450157_C_G	14725	CD40L receptor levels	0.00155554	0.00155622	22.948	41.8887	22.9378
rs4664334	T	C	T	C	0.0541	-0.0484552	0.5003	0.5358	kidney cancer	0.5541	0.0819016	GCST90274772	2	161368905	0.0118	4.55e-06	2_161368905_T_C	14288	CD40L receptor levels	0.0014692	0.0014634	20.9368	41.8887	21.0199
rs7250371	T	C	T	C	0.0686	0.0983963	0.3648	0.3906	kidney cancer	0.01395	0.0400221	GCST90274772	19	57861085	0.0116	3.34e-09	19_57861085_T_C	14722	CD40L receptor levels	0.00237025	0.00218094	32.1736	41.8887	34.9729
rs73128569	A	T	A	T	-0.1788	0.00757126	0.9406	0.94172	kidney cancer	0.9351	0.0929788	GCST90274772	20	44606446	0.0268	2.53e-11	20_44606446_A_T	14288	CD40L receptor levels	0.00310602	0.00357237	51.2178	41.8887	44.5108
rs75626299	C	G	C	G	0.1458	-0.0983849	0.9638	0.96217	kidney cancer	0.3258	0.100126	GCST90274772	9	29426599	0.0316	3.95e-06	9_29426599_C_G	14728	CD40L receptor levels	0.00144354	0.00148334	21.8761	41.8887	21.2883
rs7798473	A	C	A	C	-0.1041	-0.12936	0.0609	0.06748	kidney cancer	0.1307	0.0855926	GCST90274772	7	108543387	0.0235	9.43e-06	7_108543387_A_C	14734	CD40L receptor levels	0.00133023	0.00123954	18.2836	41.8887	19.623
rs8024256	A	G	A	G	-0.0562	-0.0248051	0.3092	0.2914	kidney cancer	0.5626	0.0428425	GCST90274772	15	26829521	0.0121	3.41e-06	15_26829521_A_G	14736	CD40L receptor levels	0.001462	0.00134926	19.9068	41.8887	21.5726
rs9526031	A	C	A	C	0.064	0.0363528	0.4882	0.4949	kidney cancer	0.3496	0.0388648	GCST90274772	13	45595067	0.012	9.64e-08	13_45595067_A_C	14288	CD40L receptor levels	0.00198711	0.00204686	29.3014	41.8887	28.4444
rs9993874	A	G	A	G	-0.0582	-0.0168571	0.4883	0.4969	kidney cancer	0.6643	0.0388427	GCST90274772	4	55046724	0.0125	3.22e-06	4_55046724_A_G	12403	CD40L receptor levels	0.00174506	0.00169269	21.0267	41.8887	21.6783
rs11622090	T	C	T	C	-0.0588	0.0449974	0.3206	0.3047	kidney cancer	0.275	0.0412207	GCST90274773	14	93329692	0.0128	4.35e-06	14_93329692_T_C	13236	T-cell surface glycoprotein CD5 levels	0.00159203	0.00150617	19.9627	41.8887	21.1025
rs117276991	A	G	A	G	-0.1261	-0.0714831	0.0751	0.07157	kidney cancer	0.4112	0.0869853	GCST90274773	10	6251691	0.0256	8.4e-07	10_6251691_A_G	14287	T-cell surface glycoprotein CD5 levels	0.00169564	0.002209	31.6254	41.8887	24.2633
rs117516652	A	G	A	G	0.2374	-0.0312843	0.9826	0.98262	kidney cancer	0.8355	0.150657	GCST90274773	13	39003323	0.0476	6.12e-07	13_39003323_A_G	14248	T-cell surface glycoprotein CD5 levels	0.001743	0.00192716	27.5073	41.8887	24.8741
rs12416520	A	G	A	G	-0.0629	0.0191161	0.7492	0.7587	kidney cancer	0.6684	0.0446279	GCST90274773	10	71211945	0.0132	1.89e-06	10_71211945_A_G	14709	T-cell surface glycoprotein CD5 levels	0.00154156	0.00148681	21.8991	41.8887	22.7067
rs1259355	A	G	A	G	0.0569	0.00975229	0.4361	0.408	kidney cancer	0.8037	0.0392349	GCST90274773	12	31688535	0.0119	1.74e-06	12_31688535_A_G	14287	T-cell surface glycoprotein CD5 levels	0.00159792	0.00159237	22.7832	41.8887	22.8629
rs138861398	A	C	A	C	-0.0803	-0.039413	0.2321	0.2464	kidney cancer	0.3902	0.0458688	GCST90274773	4	77211819	0.0151	1.05e-07	4_77211819_A_C	11967	T-cell surface glycoprotein CD5 levels	0.00235798	0.00229848	27.5647	41.8887	28.2799
rs16541	A	G	A	G	-0.0679	-0.122733	0.7871	0.7843	kidney cancer	0.01749	0.0516499	GCST90274773	17	37365138	0.015	5.99e-06	17_37365138_A_G	14287	T-cell surface glycoprotein CD5 levels	0.00143237	0.00154517	22.1069	41.8887	20.4907
rs17345759	A	C	A	C	-0.1134	-0.0803428	0.9301	0.93252	kidney cancer	0.3234	0.0813602	GCST90274773	7	97499410	0.0245	3.68e-06	7_97499410_A_C	14287	T-cell surface glycoprotein CD5 levels	0.00149749	0.0016721	23.926	41.8887	21.4237
rs17769062	T	C	T	C	0.1638	-0.164403	0.9589	0.96115	kidney cancer	0.06487	0.0890517	GCST90274773	9	27496604	0.0334	9.38e-07	9_27496604_T_C	14287	T-cell surface glycoprotein CD5 levels	0.00168083	0.00211482	30.2742	41.8887	24.0511
rs2237450	T	C	T	C	0.0623	-0.00914166	0.6389	0.6718	kidney cancer	0.8199	0.0401525	GCST90274773	7	50716017	0.0124	5.06e-07	7_50716017_T_C	14287	T-cell surface glycoprotein CD5 levels	0.00176395	0.00179088	25.6286	41.8887	25.2425
rs3104373	T	C	T	C	0.0973	0.138892	0.1469	0.1196	kidney cancer	0.008407	0.052705	GCST90274773	6	32600375	0.0165	3.7e-09	6_32600375_T_C	14735	T-cell surface glycoprotein CD5 levels	0.00235474	0.00237289	35.0429	41.8887	34.7743
rs3184504	T	C	T	C	0.1427	-0.0321101	0.4764	0.4663	kidney cancer	0.4077	0.0387827	GCST90274773	12	111884608	0.0128	7.29e-29	12_111884608_T_C	11784	T-cell surface glycoprotein CD5 levels	0.0104388	0.010159	120.921	41.8887	124.288
rs4073745	A	G	A	G	-0.0683	-0.0949702	0.7003	0.6738	kidney cancer	0.0248	0.0423124	GCST90274773	5	176733341	0.0131	1.85e-07	5_176733341_A_G	14287	T-cell surface glycoprotein CD5 levels	0.0018993	0.00195813	28.0268	41.8887	27.1831
rs4893	A	G	A	G	0.1471	0.0130149	0.9627	0.95297	kidney cancer	0.8978	0.10133	GCST90274773	19	48833608	0.0313	2.61e-06	19_48833608_A_G	14735	T-cell surface glycoprotein CD5 levels	0.00149691	0.00155401	22.9309	41.8887	22.087
rs4939490	C	G	C	G	0.1083	-0.0062193	0.6328	0.5859	kidney cancer	0.8764	0.0399866	GCST90274773	11	60793651	0.012	1.8e-19	11_60793651_C_G	14735	T-cell surface glycoprotein CD5 levels	0.00549805	0.00545075	80.746	41.8887	81.4506
rs563284470	A	G	A	G	0.1833	-0.0662466	0.9694	0.96933	kidney cancer	0.5808	0.119965	GCST90274773	3	47239457	0.0391	2.76e-06	3_47239457_A_G	11720	T-cell surface glycoprotein CD5 levels	0.00187199	0.00199333	23.4045	41.8887	21.9772
rs60562286	A	T	A	T	-0.1681	0.0519251	0.0327	0.02556	kidney cancer	0.6578	0.117225	GCST90274773	10	114454187	0.0352	1.79e-06	10_114454187_A_T	14726	T-cell surface glycoprotein CD5 levels	0.00154651	0.00178762	26.368	41.8887	22.8061
rs61747728	T	C	T	C	0.1841	-0.00568382	0.0399	0.04192	kidney cancer	0.9555	0.101858	GCST90274773	1	179526214	0.0313	4.06e-09	1_179526214_T_C	14287	T-cell surface glycoprotein CD5 levels	0.00241595	0.00259673	37.1909	41.8887	34.5954
rs6488973	A	G	A	G	-0.0613	-0.0363528	0.2804	0.3323	kidney cancer	0.6905	0.0912983	GCST90274773	12	125487245	0.0135	5.61e-06	12_125487245_A_G	14722	T-cell surface glycoprotein CD5 levels	0.00139874	0.00151642	22.3556	41.8887	20.6183
rs674379	C	G	C	G	0.1193	0.0463581	0.6395	0.6595	kidney cancer	0.2471	0.0400529	GCST90274773	11	60922561	0.0126	2.85e-21	11_60922561_C_G	12835	T-cell surface glycoprotein CD5 levels	0.00693726	0.00656231	84.7704	41.8887	89.6478
rs7012814	A	G	A	G	-0.0533	0.0280909	0.4819	0.4724	kidney cancer	0.4724	0.0390922	GCST90274773	8	9173358	0.0119	7.5e-06	8_9173358_A_G	14287	T-cell surface glycoprotein CD5 levels	0.0014024	0.00141858	20.2933	41.8887	20.0614
rs7242462	A	G	A	G	-0.1199	-0.00160128	0.8853	0.90389	kidney cancer	0.9794	0.0620144	GCST90274773	18	45545720	0.0187	1.44e-10	18_45545720_A_G	14287	T-cell surface glycoprotein CD5 levels	0.00286964	0.00291959	41.8285	41.8887	41.1107
rs72821405	T	C	T	C	-0.1014	0.0720332	0.0833	0.08998	kidney cancer	0.2879	0.0677807	GCST90274773	6	4714797	0.0217	2.97e-06	6_4714797_T_C	14727	T-cell surface glycoprotein CD5 levels	0.00148067	0.00157028	23.1588	41.8887	21.8352
rs7295476	A	T	A	T	-0.118	-0.0242047	0.0501	0.0409	kidney cancer	0.796	0.0936253	GCST90274773	12	74680262	0.0265	8.47e-06	12_74680262_A_T	14735	T-cell surface glycoprotein CD5 levels	0.00134399	0.00132529	19.5514	41.8887	19.8277
rs7298384	A	G	A	G	-0.1418	0.127777	0.9625	0.96626	kidney cancer	0.2277	0.105925	GCST90274773	12	129141888	0.032	9.37e-06	12_129141888_A_G	14718	T-cell surface glycoprotein CD5 levels	0.00133255	0.00145149	21.3912	41.8887	19.636
rs74796205	A	G	A	G	0.2987	0.130502	0.9884	0.98671	kidney cancer	0.5634	0.22586	GCST90274773	8	67386869	0.0657	5.46e-06	8_67386869_A_G	13800	T-cell surface glycoprotein CD5 levels	0.0014958	0.00204593	28.2876	41.8887	20.67
rs78808574	A	G	A	G	-0.118	0.0576083	0.9449	0.94479	kidney cancer	0.5558	0.0977918	GCST90274773	11	127558155	0.0265	8.47e-06	11_127558155_A_G	14287	T-cell surface glycoprotein CD5 levels	0.00138608	0.00144988	20.7416	41.8887	19.8277
rs11230863	A	G	A	G	0.0647	0.0001	0.7396	0.7065	kidney cancer	0.9979	0.0379926	GCST90274774	11	61779047	0.0133	1.15e-06	11_61779047_A_G	14731	T-cell surface glycoprotein CD6 isoform levels	0.00160411	0.00161241	23.7876	41.8887	23.6649
rs13109330	T	C	T	C	-0.0685	-0.0127188	0.3846	0.3732	kidney cancer	0.7501	0.0399324	GCST90274774	4	83102052	0.0129	1.1e-07	4_83102052_T_C	12404	T-cell surface glycoprotein CD6 isoform levels	0.00226842	0.00222115	27.608	41.8887	28.1969
rs1483572	A	C	A	C	0.0602	0.0443039	0.3374	0.3436	kidney cancer	0.2859	0.0415158	GCST90274774	8	79635243	0.0124	1.2e-06	8_79635243_A_C	14287	T-cell surface glycoprotein CD6 isoform levels	0.00164723	0.00162039	23.1848	41.8887	23.5695
rs4938993	C	G	C	G	-0.5114	0.128393	0.2252	0.2311	kidney cancer	0.005416	0.0461648	GCST90274774	11	60813632	0.0138	1.34e-300	11_60813632_C_G	14287	T-cell surface glycoprotein CD6 isoform levels	0.0877039	0.0912661	1434.67	41.8887	1373.29
rs494417	A	C	A	C	0.1149	-0.0299471	0.6353	0.6258	kidney cancer	0.4583	0.040379	GCST90274774	11	60626627	0.012	1.02e-21	11_60626627_A_C	14731	T-cell surface glycoprotein CD6 isoform levels	0.00618599	0.00611765	90.6615	41.8887	91.6806
rs653178	T	C	T	C	-0.1085	0.0323166	0.5224	0.5317	kidney cancer	0.4052	0.0388248	GCST90274774	12	112007756	0.0131	1.21e-16	12_112007756_T_C	11784	T-cell surface glycoprotein CD6 isoform levels	0.00578864	0.00587431	69.6201	41.8887	68.5989
rs72969761	A	T	A	T	-0.1796	-0.115523	0.97	0.97546	kidney cancer	0.3329	0.119306	GCST90274774	2	227938476	0.0376	1.78e-06	2_227938476_A_T	14710	T-cell surface glycoprotein CD6 isoform levels	0.00154885	0.00187731	27.6634	41.8887	22.8159
rs9691968	A	C	A	C	0.0646	0.0393647	0.2505	0.2515	kidney cancer	0.3762	0.044484	GCST90274774	7	153635380	0.0134	1.43e-06	7_153635380_A_C	14735	T-cell surface glycoprotein CD6 isoform levels	0.001575	0.00156702	23.1231	41.8887	23.241
rs10044847	C	G	C	G	-0.0781	0.0253753	0.8283	0.8712	kidney cancer	0.649	0.0557513	GCST90274775	5	2103391	0.0156	5.55e-07	5_2103391_C_G	14719	CUB domain-containing protein 1 levels	0.00170018	0.00173496	25.5778	41.8887	25.0641
rs10465082	T	C	T	C	-0.0504	-0.00059982	0.5023	0.4888	kidney cancer	0.9875	0.0382854	GCST90274775	9	35993938	0.0112	6.8e-06	9_35993938_T_C	14733	CUB domain-containing protein 1 levels	0.00137276	0.00127005	18.7329	41.8887	20.25
rs10964983	C	G	C	G	-0.0616	0.0461199	0.5862	0.6074	kidney cancer	0.2436	0.0395528	GCST90274775	9	21413803	0.0114	6.53e-08	9_21413803_C_G	14724	CUB domain-containing protein 1 levels	0.00197936	0.00184089	27.1516	41.8887	29.1979
rs111476793	A	G	A	G	0.0895	0.0329365	0.1339	0.1564	kidney cancer	0.565	0.057238	GCST90274775	4	53951496	0.0182	8.76e-07	4_53951496_A_G	12790	CUB domain-containing protein 1 levels	0.00188747	0.00185791	23.8032	41.8887	24.1826
rs111984955	C	G	C	G	0.2058	-0.082621	0.9817	0.98364	kidney cancer	0.5627	0.142737	GCST90274775	12	15991375	0.0461	8.04e-06	12_15991375_C_G	14725	CUB domain-containing protein 1 levels	0.00135178	0.00152178	22.4392	41.8887	19.9292
rs118116993	A	T	A	T	0.0957	-0.0333381	0.0969	0.08589	kidney cancer	0.6384	0.0709415	GCST90274775	6	162326838	0.0197	1.19e-06	6_162326838_A_T	14286	CUB domain-containing protein 1 levels	0.00164939	0.00160293	22.933	41.8887	23.5989
rs11864674	A	C	A	C	0.2029	0.0807763	0.0186	0.01943	kidney cancer	0.5932	0.151209	GCST90274775	16	66391749	0.0458	9.42e-06	16_66391749_A_C	14246	CUB domain-containing protein 1 levels	0.00137595	0.00150298	21.4407	41.8887	19.6261
rs12290068	A	G	A	G	0.1221	-0.0237165	0.3187	0.318	kidney cancer	0.5769	0.0425089	GCST90274775	11	126261564	0.0122	1.4e-23	11_126261564_A_G	14726	CUB domain-containing protein 1 levels	0.00675681	0.00647413	95.9463	41.8887	100.164
rs12928188	A	T	A	T	-0.0658	-0.0885602	0.2312	0.2014	kidney cancer	0.06465	0.0479307	GCST90274775	16	79183747	0.0134	9.09e-07	16_79183747_A_T	14715	CUB domain-containing protein 1 levels	0.00163617	0.00153916	22.6805	41.8887	24.1125
rs1463919	A	C	A	C	0.0507	0.00786896	0.4982	0.4683	kidney cancer	0.8393	0.0388037	GCST90274775	8	91776995	0.0113	7.23e-06	8_91776995_A_C	14285	CUB domain-containing protein 1 levels	0.00140743	0.00128523	18.3805	41.8887	20.1307
rs17078000	A	G	A	G	0.0609	0.0192142	0.7179	0.7311	kidney cancer	0.8264	0.0876077	GCST90274775	13	84915900	0.0128	1.96e-06	13_84915900_A_G	14286	CUB domain-containing protein 1 levels	0.00158226	0.00150221	21.4899	41.8887	22.6368
rs17607930	A	G	A	G	0.1654	0.00409162	0.9669	0.97648	kidney cancer	0.9708	0.111778	GCST90274775	12	60829749	0.037	7.81e-06	12_60829749_A_G	14286	CUB domain-containing protein 1 levels	0.00139705	0.0017511	25.0566	41.8887	19.9833
rs191929998	A	G	A	G	-0.1938	0.0454513	0.9581	0.96728	kidney cancer	0.9253	0.484763	GCST90274775	22	31852311	0.0409	2.15e-06	22_31852311_A_G	9844	CUB domain-containing protein 1 levels	0.00227608	0.00301552	29.7685	41.8887	22.4523
rs2276862	C	G	C	G	0.303	-0.125677	0.8212	0.8098	kidney cancer	0.01235	0.0502308	GCST90274775	3	45187785	0.0146	1.14e-95	3_45187785_C_G	14730	CUB domain-containing protein 1 levels	0.028413	0.0269607	408.08	41.8887	430.705
rs2742145	A	G	A	G	0.2325	-0.0625052	0.0213	0.03067	kidney cancer	0.7063	0.165871	GCST90274775	21	37270018	0.051	5.14e-06	21_37270018_A_G	11538	CUB domain-containing protein 1 levels	0.00179833	0.00225375	26.0579	41.8887	20.7829
rs28535751	T	C	T	C	-0.0541	0.0421012	0.6294	0.6708	kidney cancer	0.3019	0.0407812	GCST90274775	14	59010649	0.0118	4.55e-06	14_59010649_T_C	14733	CUB domain-containing protein 1 levels	0.00142488	0.00136539	20.1411	41.8887	21.0199
rs2990246	C	G	C	G	-0.0566	0.046882	0.4028	0.3722	kidney cancer	0.3052	0.0457231	GCST90274775	1	155197602	0.012	2.4e-06	1_155197602_C_G	14286	CUB domain-containing protein 1 levels	0.00155505	0.00154125	22.0491	41.8887	22.2469
rs34027772	T	C	T	C	0.0757	0.0490852	0.2607	0.2413	kidney cancer	0.3037	0.0477236	GCST90274775	3	43423959	0.0143	1.2e-07	3_43423959_T_C	12403	CUB domain-containing protein 1 levels	0.00225467	0.00220894	27.4537	41.8887	28.0233
rs35176543	T	G	T	G	0.0894	0.0513986	0.0924	0.1084	kidney cancer	0.4675	0.0707431	GCST90274775	11	17556914	0.0201	8.68e-06	11_17556914_T_G	14286	CUB domain-containing protein 1 levels	0.00138303	0.00134051	19.1736	41.8887	19.7826
rs35478654	T	C	T	C	-0.148	0.0149106	0.0367	0.02761	kidney cancer	0.8862	0.104187	GCST90274775	3	58453757	0.0312	2.1e-06	3_58453757_T_C	14725	CUB domain-containing protein 1 levels	0.001526	0.00154875	22.8376	41.8887	22.5016
rs4804148	T	C	T	C	-0.0619	0.027988	0.7187	0.7556	kidney cancer	0.5286	0.0444153	GCST90274775	19	11270867	0.0125	7.35e-07	19_11270867_T_C	14734	CUB domain-containing protein 1 levels	0.00166179	0.00154928	22.8593	41.8887	24.5223
rs573808300	A	G	A	G	-0.2998	0.00060018	0.0121	0.01125	kidney cancer	0.9976	0.199531	GCST90274775	7	89774204	0.0599	5.59e-07	7_89774204_A_G	11718	CUB domain-containing protein 1 levels	0.00213355	0.00214878	25.2293	41.8887	25.0501
rs59752567	T	G	T	G	-0.0923	-0.0178399	0.0938	0.091	kidney cancer	0.7986	0.0699168	GCST90274775	15	58791416	0.0204	6.05e-06	15_58791416_T_G	14730	CUB domain-containing protein 1 levels	0.00138802	0.00144831	21.3616	41.8887	20.4712
rs59872649	A	G	A	G	-0.1093	0.0995994	0.0652	0.05419	kidney cancer	0.222	0.0815568	GCST90274775	2	148430383	0.0232	2.46e-06	2_148430383_A_G	14734	CUB domain-containing protein 1 levels	0.00150435	0.00145625	21.4848	41.8887	22.1955
rs61782461	T	C	T	C	-0.2176	-0.0640053	0.9829	0.98057	kidney cancer	0.6415	0.137468	GCST90274775	1	101804329	0.0471	3.84e-06	1_101804329_T_C	14286	CUB domain-containing protein 1 levels	0.00149203	0.00159167	22.7717	41.8887	21.344
rs6452820	A	G	A	G	-0.0738	-0.00588266	0.8367	0.8323	kidney cancer	0.9157	0.0555746	GCST90274775	5	72411335	0.0159	3.46e-06	5_72411335_A_G	14286	CUB domain-containing protein 1 levels	0.00150596	0.00148833	21.291	41.8887	21.5436
rs672806	A	G	A	G	0.0816	0.0501226	0.4097	0.411	kidney cancer	0.2048	0.0395291	GCST90274775	11	126188405	0.0116	2e-12	11_126188405_A_G	14286	CUB domain-containing protein 1 levels	0.00345233	0.00322069	46.153	41.8887	49.4839
rs6991332	T	C	T	C	-0.0579	-0.0322133	0.6455	0.6554	kidney cancer	0.43	0.0408181	GCST90274775	8	61937553	0.0119	1.14e-06	8_61937553_T_C	14286	CUB domain-containing protein 1 levels	0.0016546	0.00153426	21.9491	41.8887	23.6735
rs74811341	T	C	T	C	-0.1323	0.0164343	0.0513	0.04908	kidney cancer	0.8632	0.0953807	GCST90274775	17	38720826	0.0277	1.79e-06	17_38720826_T_C	14734	CUB domain-containing protein 1 levels	0.00154606	0.00170371	25.1419	41.8887	22.8118
rs7506429	A	C	A	C	0.0737	0.131291	0.7965	0.7924	kidney cancer	0.008617	0.0499798	GCST90274775	18	19991319	0.0144	3.09e-07	18_19991319_A_C	14286	CUB domain-containing protein 1 levels	0.00183048	0.00176082	25.1959	41.8887	26.1945
rs75892552	T	G	T	G	-0.1259	0.121716	0.0544	0.05112	kidney cancer	0.1733	0.0893867	GCST90274775	17	36021431	0.0279	6.41e-06	17_36021431_T_G	14286	CUB domain-containing protein 1 levels	0.00142356	0.00163075	23.3317	41.8887	20.3631
rs7618923	T	C	T	C	-0.1738	-0.0228372	0.1811	0.18	kidney cancer	0.65	0.0503286	GCST90274775	3	45130725	0.0151	1.18e-30	3_45130725_T_C	14286	CUB domain-containing protein 1 levels	0.00918938	0.0089594	129.133	41.8887	132.479
rs10042665	C	G	C	G	0.0583	-0.0246926	0.3043	0.32	kidney cancer	0.5722	0.0437181	GCST90274776	5	78775099	0.0122	1.76e-06	5_78775099_C_G	14727	Macrophage colony-stimulating factor 1 levels	0.00154842	0.0014391	21.2213	41.8887	22.8359
rs115370595	A	G	A	G	-0.2277	0.00369317	0.9815	0.98262	kidney cancer	0.9801	0.148061	GCST90274776	2	140484970	0.0496	4.42e-06	2_140484970_A_G	13799	Macrophage colony-stimulating factor 1 levels	0.00152516	0.00188286	26.0268	41.8887	21.0748
rs116039112	A	G	A	G	0.2238	0.156303	0.016	0.0184	kidney cancer	0.3283	0.159894	GCST90274776	4	154438727	0.0504	8.98e-06	4_154438727_A_G	14286	Macrophage colony-stimulating factor 1 levels	0.00137851	0.00157712	22.5632	41.8887	19.7178
rs116443177	T	C	T	C	0.0827	0.0582649	0.1595	0.1534	kidney cancer	0.284	0.0543832	GCST90274776	2	27764122	0.0173	1.75e-06	2_27764122_T_C	12403	Macrophage colony-stimulating factor 1 levels	0.00183934	0.00183375	22.7821	41.8887	22.8517
rs11685487	T	C	T	C	0.0944	0.0482453	0.1197	0.1217	kidney cancer	0.4605	0.0653709	GCST90274776	2	8775320	0.0196	1.46e-06	2_8775320_T_C	14286	Macrophage colony-stimulating factor 1 levels	0.00162135	0.00187801	26.876	41.8887	23.197
rs117591817	C	G	C	G	-0.1989	-0.0353671	0.0348	0.01738	kidney cancer	0.8254	0.160319	GCST90274776	19	58875573	0.0435	4.82e-06	19_58875573_C_G	14286	Macrophage colony-stimulating factor 1 levels	0.00146152	0.00265764	38.0629	41.8887	20.907
rs11806838	T	C	T	C	0.0674	0.0203048	0.185	0.1646	kidney cancer	0.6832	0.0497543	GCST90274776	1	190519358	0.0152	9.24e-06	1_190519358_T_C	14286	Macrophage colony-stimulating factor 1 levels	0.00137463	0.00136987	19.5941	41.8887	19.6622
rs12549430	A	G	A	G	-0.061	-0.00120072	0.738	0.7638	kidney cancer	0.9787	0.0449729	GCST90274776	8	80715263	0.0135	6.23e-06	8_80715263_A_G	14286	Macrophage colony-stimulating factor 1 levels	0.00142732	0.00143896	20.5837	41.8887	20.417
rs142421172	A	G	A	G	0.1439	0.0401972	0.044	0.05419	kidney cancer	0.6844	0.0988943	GCST90274776	1	179682087	0.031	3.45e-06	1_179682087_A_G	12840	Macrophage colony-stimulating factor 1 levels	0.00167561	0.00174206	22.4035	41.8887	21.5476
rs142902162	T	C	T	C	0.3234	-0.463294	0.0106	0.01636	kidney cancer	0.3822	0.530175	GCST90274776	13	75660663	0.0723	7.71e-06	13_75660663_T_C	12898	Macrophage colony-stimulating factor 1 levels	0.00154908	0.00219375	28.3528	41.8887	20.008
rs1605333	C	G	C	G	-0.0601	0.0282966	0.6484	0.6677	kidney cancer	0.4935	0.0413238	GCST90274776	12	58388232	0.0124	1.25e-06	12_58388232_C_G	13237	Macrophage colony-stimulating factor 1 levels	0.00177179	0.00164691	21.8329	41.8887	23.4912
rs17610659	T	C	T	C	0.1684	-0.0290169	0.4821	0.4847	kidney cancer	0.4574	0.0390467	GCST90274776	1	110503296	0.0118	3.31e-46	1_110503296_T_C	14286	Macrophage colony-stimulating factor 1 levels	0.0140579	0.0141611	205.183	41.8887	203.667
rs17638424	A	T	A	T	0.1034	-0.0921153	0.9329	0.93149	kidney cancer	0.2208	0.0752328	GCST90274776	18	3048453	0.023	6.94e-06	18_3048453_A_T	14715	Macrophage colony-stimulating factor 1 levels	0.00137179	0.00133853	19.7202	41.8887	20.2109
rs17734417	T	C	T	C	-0.1225	0.0754785	0.9466	0.94376	kidney cancer	0.4223	0.0940615	GCST90274776	14	58461604	0.0265	3.79e-06	14_58461604_T_C	14723	Macrophage colony-stimulating factor 1 levels	0.00144948	0.00151709	22.3669	41.8887	21.3688
rs2523992	T	G	T	G	-0.075	0.0411419	0.8323	0.8834	kidney cancer	0.4348	0.0526783	GCST90274776	6	30075103	0.0152	8.05e-07	6_30075103_T_G	14734	Macrophage colony-stimulating factor 1 levels	0.0016499	0.00157024	23.1691	41.8887	24.3464
rs28673875	A	T	A	T	-0.2096	-0.026344	0.9801	0.98671	kidney cancer	0.8531	0.142273	GCST90274776	15	45690795	0.046	5.2e-06	15_45690795_A_T	14236	Macrophage colony-stimulating factor 1 levels	0.00145649	0.00171371	24.4347	41.8887	20.7619
rs34674345	T	C	T	C	-0.2243	0.0712969	0.9814	0.98773	kidney cancer	0.7054	0.188596	GCST90274776	15	63787216	0.0503	8.22e-06	15_63787216_T_C	14286	Macrophage colony-stimulating factor 1 levels	0.00139017	0.00183674	26.2843	41.8887	19.8849
rs3934571	T	C	T	C	-0.0802	0.0253178	0.1143	0.09407	kidney cancer	0.6897	0.0634115	GCST90274776	5	174229899	0.018	8.37e-06	5_174229899_T_C	14732	Macrophage colony-stimulating factor 1 levels	0.00134591	0.0013023	19.2079	41.8887	19.852
rs563284470	A	G	A	G	0.2087	-0.0662466	0.9696	0.96933	kidney cancer	0.5808	0.119965	GCST90274776	3	47239457	0.0385	5.93e-08	3_47239457_A_G	11720	Macrophage colony-stimulating factor 1 levels	0.0025014	0.00256768	30.1655	41.8887	29.3848
rs7227917	A	G	A	G	-0.0872	-0.00330546	0.8823	0.90389	kidney cancer	0.9584	0.0633697	GCST90274776	18	45546185	0.0185	2.43e-06	18_45546185_A_G	14286	Macrophage colony-stimulating factor 1 levels	0.00155298	0.00157927	22.5939	41.8887	22.2172
rs72783071	T	C	T	C	-0.199	-0.0449734	0.0231	0.0317	kidney cancer	0.7352	0.132972	GCST90274776	16	60437963	0.0414	1.53e-06	16_60437963_T_C	14247	Macrophage colony-stimulating factor 1 levels	0.00161934	0.0017873	25.5057	41.8887	23.105
rs74849049	T	G	T	G	-0.0914	-0.0473013	0.8992	0.8978	kidney cancer	0.4698	0.0654413	GCST90274776	3	171430935	0.02	4.88e-06	3_171430935_T_G	14286	Macrophage colony-stimulating factor 1 levels	0.00145998	0.00151439	21.6644	41.8887	20.8849
rs75305583	T	C	T	C	-0.1493	0.0159262	0.0382	0.03579	kidney cancer	0.8713	0.0983051	GCST90274776	4	183461339	0.0329	5.68e-06	4_183461339_T_C	14286	Macrophage colony-stimulating factor 1 levels	0.00143964	0.00163794	23.4347	41.8887	20.5934
rs7538029	A	C	A	C	0.0775	-0.0454513	0.2211	0.1912	kidney cancer	0.3614	0.0497987	GCST90274776	1	110474695	0.0165	2.64e-06	1_110474695_A_C	11335	Macrophage colony-stimulating factor 1 levels	0.00194288	0.00206873	23.4935	41.8887	22.0615
rs75869070	A	G	A	G	0.1151	0.00707491	0.936	0.92843	kidney cancer	0.9311	0.0818279	GCST90274776	14	78693608	0.0239	1.47e-06	14_78693608_A_G	14715	Macrophage colony-stimulating factor 1 levels	0.00157387	0.00158722	23.3899	41.8887	23.1929
rs76421506	A	G	A	G	0.0778	0.0101483	0.853	0.8569	kidney cancer	0.8509	0.053989	GCST90274776	3	115295680	0.0168	3.64e-06	3_115295680_A_G	14286	Macrophage colony-stimulating factor 1 levels	0.00149913	0.00151794	21.7153	41.8887	21.4457
rs7825914	A	G	A	G	0.054	-0.0118702	0.3028	0.2914	kidney cancer	0.7776	0.042026	GCST90274776	8	19590012	0.0122	9.59e-06	8_19590012_A_G	14732	Macrophage colony-stimulating factor 1 levels	0.00132828	0.00123121	18.158	41.8887	19.5915
rs78652121	C	G	C	G	-0.1189	-0.256037	0.0697	0.03885	kidney cancer	0.02211	0.111881	GCST90274776	4	13713646	0.026	4.81e-06	4_13713646_C_G	12838	Macrophage colony-stimulating factor 1 levels	0.0016266	0.00183337	23.5763	41.8887	20.913
rs846654	T	C	T	C	-0.0519	0.0198966	0.5786	0.6094	kidney cancer	0.6203	0.0401607	GCST90274776	2	10646611	0.0114	5.3e-06	2_10646611_T_C	14707	Macrophage colony-stimulating factor 1 levels	0.0014075	0.00131352	19.3408	41.8887	20.7265
rs10479093	A	G	A	G	-0.0565	-0.078164	0.587	0.5675	kidney cancer	0.04643	0.0392495	GCST90274777	5	134508559	0.0116	1.11e-06	5_134508559_A_G	14712	Cystatin D levels	0.00161016	0.0015478	22.8034	41.8887	23.7236
rs11054089	T	G	T	G	0.1707	0.036139	0.7422	0.7843	kidney cancer	0.4225	0.045056	GCST90274777	12	11116082	0.0133	1.05e-37	12_11116082_T_G	14288	Cystatin D levels	0.0113992	0.0111507	161.095	41.8887	164.727
rs112961631	T	C	T	C	0.5656	-0.106969	0.0233	0.01125	kidney cancer	0.5987	0.203259	GCST90274777	20	23929099	0.0476	1.46e-32	20_23929099_T_C	12148	Cystatin D levels	0.0114909	0.0145602	179.461	41.8887	141.19
rs117068418	T	C	T	C	0.1632	-0.0695645	0.961	0.97035	kidney cancer	0.5039	0.104081	GCST90274777	20	24176153	0.0311	1.54e-07	20_24176153_T_C	14716	Cystatin D levels	0.001868	0.00199645	29.4345	41.8887	27.5372
rs141192864	T	C	T	C	0.1016	0.0712812	0.0812	0.08896	kidney cancer	0.3496	0.0762068	GCST90274777	12	31381343	0.0213	1.84e-06	12_31381343_T_C	14728	Cystatin D levels	0.00154267	0.00154026	22.7169	41.8887	22.7525
rs1509659	A	G	A	G	-0.0671	0.0549616	0.6342	0.6176	kidney cancer	0.1697	0.0400254	GCST90274777	11	34865133	0.0118	1.3e-08	11_34865133_A_G	14732	Cystatin D levels	0.00219041	0.00208903	30.8359	41.8887	32.3356
rs470841	T	C	T	C	0.0568	-0.0373921	0.6369	0.6258	kidney cancer	0.3481	0.0398517	GCST90274777	18	24286681	0.0119	1.81e-06	18_24286681_T_C	14736	Cystatin D levels	0.00154387	0.00149219	22.0188	41.8887	22.7826
rs4950836	A	G	A	G	0.0585	0.0481233	0.6022	0.5613	kidney cancer	0.2274	0.0398674	GCST90274777	1	202192624	0.012	1.09e-06	1_202192624_A_G	14288	Cystatin D levels	0.0016608	0.00163963	23.4623	41.8887	23.7656
rs60586299	T	C	T	C	-0.0654	0.135705	0.3077	0.2761	kidney cancer	0.1445	0.0929974	GCST90274777	18	3479423	0.0134	1.06e-06	18_3479423_T_C	14288	Cystatin D levels	0.00166461	0.00182225	26.0801	41.8887	23.8202
rs6106715	C	G	C	G	-0.3784	0.00767051	0.6593	0.6605	kidney cancer	0.8536	0.0415685	GCST90274777	20	23770266	0.0118	1.24e-225	20_23770266_C_G	14726	Cystatin D levels	0.0652819	0.0643261	1012.25	41.8887	1028.34
rs72748935	T	C	T	C	0.0772	-0.0236781	0.4618	0.4029	kidney cancer	0.5444	0.0390617	GCST90274777	15	63639416	0.0114	1.27e-11	15_63639416_T_C	14722	Cystatin D levels	0.00310575	0.00296253	43.738	41.8887	45.859
rs7275493	T	C	T	C	-0.0572	0.00905884	0.6243	0.6616	kidney cancer	0.8238	0.0406846	GCST90274777	21	18049996	0.0119	1.53e-06	21_18049996_T_C	14727	Cystatin D levels	0.00156661	0.00153482	22.6349	41.8887	23.1046
rs72980022	A	G	A	G	0.0607	-0.0467882	0.2813	0.274	kidney cancer	0.2848	0.0437437	GCST90274777	2	233853187	0.0126	1.45e-06	2_233853187_A_G	14721	Cystatin D levels	0.00157425	0.00148979	21.9609	41.8887	23.2079
rs77415137	A	G	A	G	-0.2494	-0.0722482	0.9789	0.97035	kidney cancer	0.5718	0.127782	GCST90274777	20	24084648	0.0438	1.24e-08	20_24084648_A_G	14736	Cystatin D levels	0.00219568	0.00256947	37.9561	41.8887	32.4224
rs7943316	A	T	A	T	-0.0639	0.0114344	0.345	0.3323	kidney cancer	0.7815	0.041225	GCST90274777	11	34460472	0.012	1.01e-07	11_34460472_A_T	14731	Cystatin D levels	0.00192146	0.00184541	27.2312	41.8887	28.3556
rs10778675	A	C	A	C	0.0792	0.0709243	0.1687	0.1677	kidney cancer	0.1621	0.0507311	GCST90274778	12	79905558	0.0158	5.37e-07	12_79905558_A_C	14295	Fractalkine levels	0.00175489	0.00175935	25.1908	41.8887	25.1267
rs111472651	C	G	C	G	-0.1191	-0.119572	0.9355	0.94785	kidney cancer	0.1419	0.0814107	GCST90274778	2	44117788	0.0248	1.57e-06	2_44117788_C_G	14728	Fractalkine levels	0.00156371	0.00171182	25.2514	41.8887	23.0632
rs114359340	A	G	A	G	-0.1881	-0.0267547	0.9747	0.97239	kidney cancer	0.8362	0.129402	GCST90274778	1	6532317	0.0405	3.41e-06	1_6532317_A_G	13651	Fractalkine levels	0.00157791	0.00174501	23.8593	41.8887	21.5709
rs11682107	A	G	A	G	-0.0675	0.00601807	0.5568	0.6145	kidney cancer	0.8795	0.0396962	GCST90274778	2	113835522	0.0126	8.45e-08	2_113835522_A_G	12412	Fractalkine levels	0.00230723	0.00224873	27.9696	41.8887	28.699
rs117698194	A	G	A	G	-0.1996	-0.0619414	0.0224	0.01738	kidney cancer	0.658	0.139925	GCST90274778	15	85657494	0.0432	3.83e-06	15_85657494_A_G	13859	Fractalkine levels	0.00153821	0.00174486	24.2208	41.8887	21.3478
rs12331618	A	G	A	G	-0.0582	0.026155	0.4914	0.4765	kidney cancer	0.4997	0.0387503	GCST90274778	4	187139939	0.0114	3.3e-07	4_187139939_A_G	14729	Fractalkine levels	0.00176666	0.00169312	24.9769	41.8887	26.0637
rs13167439	T	C	T	C	-0.0903	-0.027988	0.89	0.8916	kidney cancer	0.6699	0.0656557	GCST90274778	5	120396066	0.0193	2.89e-06	5_120396066_T_C	14295	Fractalkine levels	0.00152923	0.00159657	22.8563	41.8887	21.8908
rs16904321	A	G	A	G	-0.0867	-0.0163327	0.8632	0.8814	kidney cancer	0.8017	0.0650321	GCST90274778	8	131635787	0.0193	7.05e-06	8_131635787_A_G	14295	Fractalkine levels	0.0014099	0.00177527	25.4191	41.8887	20.1801
rs1976172	C	G	C	G	-0.0569	0.000900405	0.3525	0.3456	kidney cancer	0.9817	0.0392545	GCST90274778	3	1260482	0.012	2.12e-06	3_1260482_C_G	14732	Fractalkine levels	0.00152404	0.00147793	21.8021	41.8887	22.4834
rs2442752	T	C	T	C	-0.0589	0.0967637	0.6177	0.5961	kidney cancer	0.01477	0.0396903	GCST90274778	6	31351764	0.0117	4.8e-07	6_31351764_T_C	14743	Fractalkine levels	0.00171627	0.00163849	24.1925	41.8887	25.343
rs2731674	T	G	T	G	-0.0681	-0.0328332	0.274	0.2239	kidney cancer	0.4694	0.0453838	GCST90274778	5	176839890	0.0128	1.04e-07	5_176839890_T_G	14740	Fractalkine levels	0.00191691	0.00184506	27.2428	41.8887	28.3057
rs35026817	T	G	T	G	0.0633	0.0638195	0.3327	0.2853	kidney cancer	0.1206	0.0411139	GCST90274778	3	70136592	0.0122	2.12e-07	3_70136592_T_G	14740	Fractalkine levels	0.00182329	0.00177914	26.2678	41.8887	26.9208
rs36067349	T	C	T	C	0.0666	0.0175452	0.8038	0.7975	kidney cancer	0.7241	0.0497052	GCST90274778	15	23001299	0.015	9e-06	15_23001299_T_C	14294	Fractalkine levels	0.00137744	0.00139902	20.0229	41.8887	19.7136
rs3732378	A	G	A	G	0.0941	0.161461	0.1671	0.1718	kidney cancer	0.0009675	0.0489303	GCST90274778	3	39307162	0.0154	9.94e-10	3_39307162_A_G	14740	Fractalkine levels	0.00252697	0.00246478	36.4157	41.8887	37.3369
rs530057572	T	G	T	G	-0.2257	0.189132	0.979	0.98364	kidney cancer	0.426	0.237586	GCST90274778	14	85801666	0.0491	4.29e-06	14_85801666_T_G	12127	Fractalkine levels	0.00173965	0.00209457	25.45	41.8887	21.13
rs543554558	C	G	C	G	-0.2883	0.363323	0.9837	0.98978	kidney cancer	0.1393	0.245754	GCST90274778	19	19437687	0.0633	5.25e-06	19_19437687_C_G	11091	Fractalkine levels	0.00186714	0.00266544	29.6361	41.8887	20.7435
rs55896747	T	C	T	C	0.1129	0.00975229	0.9372	0.9499	kidney cancer	0.9039	0.0807736	GCST90274778	16	57508595	0.0244	3.71e-06	16_57508595_T_C	14734	Fractalkine levels	0.00145116	0.00150041	22.1372	41.8887	21.4096
rs56397903	A	G	A	G	0.1968	-0.0764492	0.9744	0.97853	kidney cancer	0.6099	0.149837	GCST90274778	8	26741279	0.0424	3.46e-06	8_26741279_A_G	14743	Fractalkine levels	0.00145934	0.00193222	28.5381	41.8887	21.5436
rs56675723	T	C	T	C	0.0666	-0.0599623	0.7791	0.7556	kidney cancer	0.1882	0.0455668	GCST90274778	11	120941125	0.0149	7.83e-06	11_120941125_T_C	12412	Fractalkine levels	0.00160733	0.00152675	18.9759	41.8887	19.9791
rs571946532	A	C	A	C	-0.2404	0.175045	0.981	0.97342	kidney cancer	0.3318	0.180367	GCST90274778	9	88885541	0.0512	2.66e-06	9_88885541_A_C	11768	Fractalkine levels	0.0018702	0.00215438	25.4031	41.8887	22.046
rs635634	T	C	T	C	-0.1145	0.0231663	0.1884	0.1861	kidney cancer	0.6403	0.0495769	GCST90274778	9	136155000	0.0166	5.29e-12	9_136155000_T_C	11792	Fractalkine levels	0.00401913	0.00400926	47.4594	41.8887	47.5768
rs6937696	T	C	T	C	-0.0811	-0.00677698	0.651	0.7209	kidney cancer	0.868	0.0407762	GCST90274778	6	32418018	0.012	1.4e-11	6_32418018_T_C	14742	Fractalkine levels	0.00308914	0.00298867	44.1851	41.8887	45.6751
rs712137	A	C	A	C	0.0563	-0.0933993	0.6601	0.6738	kidney cancer	0.01987	0.0401063	GCST90274778	12	41381284	0.012	2.71e-06	12_41381284_A_C	14737	Fractalkine levels	0.00149161	0.00142235	20.9882	41.8887	22.0117
rs71451021	A	C	A	C	-0.165	-0.14908	0.9728	0.98773	kidney cancer	0.1993	0.116147	GCST90274778	2	19059082	0.0362	5.16e-06	2_19059082_A_C	14740	Fractalkine levels	0.00140767	0.00144076	21.2645	41.8887	20.7755
rs72704449	T	C	T	C	-0.1358	-0.034695	0.9547	0.94683	kidney cancer	0.7151	0.0950507	GCST90274778	1	179473273	0.0298	5.19e-06	1_179473273_T_C	14295	Fractalkine levels	0.00145082	0.00159512	22.8355	41.8887	20.7667
rs73007244	T	C	T	C	0.0813	-0.0614713	0.1321	0.1237	kidney cancer	0.3152	0.0612038	GCST90274778	18	59374764	0.0179	5.57e-06	18_59374764_T_C	14295	Fractalkine levels	0.0014412	0.0015156	21.6953	41.8887	20.6289
rs73137770	C	G	C	G	0.2442	-0.29236	0.9812	0.98569	kidney cancer	0.3798	0.332883	GCST90274778	20	52569781	0.0529	3.91e-06	20_52569781_C_G	13808	Fractalkine levels	0.00154114	0.00220007	30.4412	41.8887	21.3098
rs77819349	C	G	C	G	0.1196	-0.00080032	0.9371	0.9274	kidney cancer	0.9925	0.0851405	GCST90274778	9	81886673	0.0263	5.43e-06	9_81886673_C_G	14295	Fractalkine levels	0.00144477	0.00168628	24.1427	41.8887	20.68
rs77915710	A	G	A	G	-0.1436	0.0136933	0.0402	0.05521	kidney cancer	0.8882	0.0974044	GCST90274778	1	172099857	0.0304	2.32e-06	1_172099857_A_G	14742	Fractalkine levels	0.0015115	0.00159128	23.4928	41.8887	22.3132
rs78751841	A	G	A	G	-0.1935	-0.227779	0.9764	0.98057	kidney cancer	0.04278	0.112436	GCST90274778	16	57183274	0.0433	7.87e-06	16_57183274_A_G	14723	Fractalkine levels	0.00135475	0.00172557	25.446	41.8887	19.9704
rs8052631	A	G	A	G	-0.1511	-0.116805	0.9463	0.96421	kidney cancer	0.1871	0.0885417	GCST90274778	16	57167230	0.027	2.19e-08	16_57167230_A_G	14295	Fractalkine levels	0.00218639	0.0023204	33.2426	41.8887	31.3185
rs980364	A	G	A	G	0.1479	0.0447821	0.9343	0.94172	kidney cancer	0.6014	0.0857258	GCST90274778	4	179539497	0.0301	8.94e-07	4_179539497_A_G	9902	Fractalkine levels	0.00243282	0.00268546	26.6576	41.8887	24.1437
rs9981489	T	C	T	C	0.1127	0.0368715	0.0652	0.0726	kidney cancer	0.6686	0.0861342	GCST90274778	21	25498266	0.0254	9.12e-06	21_25498266_T_C	14295	Fractalkine levels	0.0013755	0.00154826	22.1636	41.8887	19.687
rs10508556	T	C	T	C	0.0518	0.0670977	0.4633	0.4325	kidney cancer	0.08462	0.0389088	GCST90274779	10	18285342	0.0116	7.99e-06	10_18285342_T_C	14735	C-X-C motif chemokine 1 levels	0.00135165	0.00133439	19.6859	41.8887	19.9408
rs10734292	A	G	A	G	0.123	-0.0594316	0.067	0.06851	kidney cancer	0.4645	0.081251	GCST90274779	11	20486401	0.0267	4.09e-06	11_20486401_A_G	11776	C-X-C motif chemokine 1 levels	0.00179921	0.00189146	22.3122	41.8887	21.2221
rs118090102	T	G	T	G	-0.2573	0.177931	0.0166	0.01431	kidney cancer	0.2842	0.166146	GCST90274779	12	28799395	0.0582	9.83e-06	12_28799395_T_G	12935	C-X-C motif chemokine 1 levels	0.00150896	0.00216146	28.0148	41.8887	19.5449
rs11880837	A	G	A	G	0.0583	-0.0579858	0.3161	0.3057	kidney cancer	0.1781	0.04306	GCST90274779	19	14808453	0.0127	4.42e-06	19_14808453_A_G	14288	C-X-C motif chemokine 1 levels	0.00147292	0.00146955	21.0249	41.8887	21.0732
rs12770839	A	C	A	C	0.0648	0.0434296	0.321	0.3395	kidney cancer	0.2965	0.0416005	GCST90274779	10	65297720	0.0126	2.71e-07	10_65297720_A_C	14724	C-X-C motif chemokine 1 levels	0.00179334	0.00183044	26.9971	41.8887	26.449
rs1366946	T	C	T	C	-0.3134	0.00737275	0.7638	0.7914	kidney cancer	0.8759	0.0472102	GCST90274779	4	74738469	0.0134	5.65e-121	4_74738469_T_C	14730	C-X-C motif chemokine 1 levels	0.0358102	0.0354395	541.13	41.8887	547.001
rs141276323	C	G	C	G	0.1982	-0.0256677	0.0196	0.02045	kidney cancer	0.8527	0.138241	GCST90274779	12	90180208	0.0444	8.05e-06	12_90180208_C_G	14728	C-X-C motif chemokine 1 levels	0.00135135	0.00150972	22.2658	41.8887	19.927
rs144620567	T	C	T	C	0.1891	0.0128175	0.9761	0.97444	kidney cancer	0.9232	0.132957	GCST90274779	7	115483444	0.0426	9.04e-06	7_115483444_T_C	14730	C-X-C motif chemokine 1 levels	0.0013361	0.00166842	24.6135	41.8887	19.7044
rs144747179	T	C	T	C	0.2626	0.0775292	0.0157	0.01125	kidney cancer	0.6701	0.181989	GCST90274779	5	159394723	0.0582	6.42e-06	5_159394723_T_C	12591	C-X-C motif chemokine 1 levels	0.00161455	0.00213131	26.8884	41.8887	20.3584
rs146204850	T	C	T	C	0.2706	0.13296	0.0138	0.01329	kidney cancer	0.6974	0.341947	GCST90274779	10	13896867	0.0601	6.72e-06	10_13896867_T_C	13801	C-X-C motif chemokine 1 levels	0.00146697	0.0019931	27.5577	41.8887	20.2725
rs150441545	A	C	A	C	-0.0719	0.103369	0.8268	0.8057	kidney cancer	0.04865	0.0524275	GCST90274779	14	35091527	0.0158	5.35e-06	14_35091527_A_C	14288	C-X-C motif chemokine 1 levels	0.00144745	0.00148059	21.1831	41.8887	20.7083
rs2122155	A	G	A	G	-0.0538	-0.052118	0.5637	0.5225	kidney cancer	0.1827	0.0391133	GCST90274779	4	59689961	0.0117	4.26e-06	4_59689961_A_G	14717	C-X-C motif chemokine 1 levels	0.00143486	0.00142373	20.9801	41.8887	21.1443
rs2280441	A	G	A	G	-0.1443	0.0232281	0.0405	0.04294	kidney cancer	0.8416	0.116229	GCST90274779	15	81240669	0.0312	3.75e-06	15_81240669_A_G	14735	C-X-C motif chemokine 1 levels	0.00144978	0.00161831	23.8813	41.8887	21.3906
rs2835916	C	G	C	G	-0.0564	-0.00508704	0.3876	0.3753	kidney cancer	0.8989	0.0400393	GCST90274779	21	39102421	0.012	2.6e-06	21_39102421_C_G	14735	C-X-C motif chemokine 1 levels	0.00149711	0.00151011	22.282	41.8887	22.09
rs4474574	T	C	T	C	-0.365	-0.313479	0.0146	0.01534	kidney cancer	0.3419	0.329832	GCST90274779	13	37854253	0.0779	2.79e-06	13_37854253_T_C	9555	C-X-C motif chemokine 1 levels	0.00229284	0.00383337	36.7611	41.8887	21.9539
rs565208061	T	C	T	C	0.5003	0.116309	0.0138	0.01227	kidney cancer	0.5862	0.213666	GCST90274779	4	74717663	0.0824	1.27e-09	4_74717663_T_C	8911	C-X-C motif chemokine 1 levels	0.00412083	0.00681295	61.1129	41.8887	36.8644
rs57228648	T	C	T	C	0.2036	0.532509	0.9769	0.97035	kidney cancer	0.006553	0.195866	GCST90274779	8	134581618	0.0452	6.66e-06	8_134581618_T_C	14735	C-X-C motif chemokine 1 levels	0.00137528	0.00187089	27.6154	41.8887	20.2898
rs62311721	T	C	T	C	-0.186	-0.157941	0.9588	0.96115	kidney cancer	0.2553	0.138841	GCST90274779	4	84005961	0.0407	4.88e-06	4_84005961_T_C	14288	C-X-C motif chemokine 1 levels	0.0014598	0.00273326	39.1544	41.8887	20.8851
rs6700633	T	C	T	C	-0.1886	-0.24169	0.9791	0.96728	kidney cancer	0.04565	0.120929	GCST90274779	1	211439817	0.042	7.11e-06	1_211439817_T_C	14726	C-X-C motif chemokine 1 levels	0.00136762	0.00145575	21.4657	41.8887	20.1644
rs67797811	C	G	C	G	0.0822	0.0434296	0.1691	0.181	kidney cancer	0.7219	0.12202	GCST90274779	9	4396102	0.0179	4.39e-06	9_4396102_C_G	14288	C-X-C motif chemokine 1 levels	0.00147396	0.00189874	27.177	41.8887	21.0881
rs6807587	A	G	A	G	0.0577	-0.0538251	0.2947	0.2883	kidney cancer	0.2188	0.04377	GCST90274779	3	45270029	0.0128	6.55e-06	3_45270029_A_G	14733	C-X-C motif chemokine 1 levels	0.00137753	0.001384	20.4159	41.8887	20.3204
rs75883619	T	C	T	C	-0.2241	-0.119121	0.9769	0.97239	kidney cancer	0.4342	0.152324	GCST90274779	1	191712620	0.0502	8.04e-06	1_191712620_T_C	14736	C-X-C motif chemokine 1 levels	0.00135073	0.00226661	33.472	41.8887	19.9286
rs7700661	A	G	A	G	0.0556	-0.0190809	0.3196	0.3047	kidney cancer	0.649	0.041922	GCST90274779	5	122405522	0.0124	7.33e-06	5_122405522_A_G	14719	C-X-C motif chemokine 1 levels	0.00136425	0.00134447	19.8132	41.8887	20.1051
rs8136931	A	G	A	G	-0.1533	-0.0285875	0.0337	0.03067	kidney cancer	0.8408	0.142318	GCST90274779	22	33031339	0.0344	8.33e-06	22_33031339_A_G	14736	C-X-C motif chemokine 1 levels	0.00134605	0.00153058	22.5861	41.8887	19.8595
rs863004	T	C	T	C	0.0661	-0.0756639	0.3809	0.4213	kidney cancer	0.06039	0.040291	GCST90274779	1	159176831	0.0119	2.78e-08	1_159176831_T_C	14722	C-X-C motif chemokine 1 levels	0.00209166	0.00206065	30.3954	41.8887	30.8538
rs937341	T	G	T	G	0.066	0.00119928	0.7719	0.7464	kidney cancer	0.9814	0.0514409	GCST90274779	12	125093430	0.0146	6.17e-06	12_125093430_T_G	14288	C-X-C motif chemokine 1 levels	0.0014284	0.00153393	21.9473	41.8887	20.4354
rs10481754	T	C	T	C	-0.0548	-0.129312	0.4567	0.4796	kidney cancer	0.001014	0.039345	GCST90274780	9	84196490	0.0119	4.12e-06	9_84196490_T_C	14296	C-X-C motif chemokine 10 levels	0.00148139	0.00149026	21.3336	41.8887	21.2064
rs1077965	A	G	A	G	-0.0546	-0.0707444	0.5648	0.5849	kidney cancer	0.07054	0.0391193	GCST90274780	15	80065337	0.0118	3.71e-06	15_80065337_A_G	14731	C-X-C motif chemokine 10 levels	0.0014515	0.00146554	21.6177	41.8887	21.4102
rs112202639	A	G	A	G	-0.1609	-0.039989	0.9671	0.96626	kidney cancer	0.7446	0.122753	GCST90274780	1	44566391	0.0336	1.68e-06	1_44566391_A_G	14744	C-X-C motif chemokine 10 levels	0.00155311	0.00164744	24.3266	41.8887	22.9316
rs115140093	T	C	T	C	-0.5186	0.142887	0.9732	0.97546	kidney cancer	0.3136	0.141796	GCST90274780	4	76910673	0.042	5.02e-35	4_76910673_T_C	14744	C-X-C motif chemokine 10 levels	0.0102363	0.0140292	209.761	41.8887	152.464
rs11645285	C	G	C	G	-0.1096	-0.0720332	0.9073	0.90695	kidney cancer	0.2853	0.067416	GCST90274780	16	5063233	0.0242	5.93e-06	16_5063233_C_G	11345	C-X-C motif chemokine 10 levels	0.001805	0.00202061	22.9661	41.8887	20.5112
rs117298099	A	G	A	G	0.1456	-0.101383	0.0363	0.03272	kidney cancer	0.3957	0.119368	GCST90274780	6	152726625	0.0325	7.46e-06	6_152726625_A_G	14725	C-X-C motif chemokine 10 levels	0.00136134	0.00148321	21.8697	41.8887	20.0704
rs11825923	T	C	T	C	0.1921	0.413396	0.0237	0.02249	kidney cancer	0.001499	0.130209	GCST90274780	11	116006514	0.0421	5.04e-06	11_116006514_T_C	14247	C-X-C motif chemokine 10 levels	0.00145947	0.00170772	24.3681	41.8887	20.8205
rs12155428	T	C	T	C	-0.1765	0.090253	0.0284	0.03374	kidney cancer	0.4019	0.107671	GCST90274780	7	3425301	0.0375	2.52e-06	7_3425301_T_C	14733	C-X-C motif chemokine 10 levels	0.00150156	0.00171919	25.3691	41.8887	22.1527
rs12174864	A	G	A	G	-0.0582	0.0187236	0.6254	0.6431	kidney cancer	0.643	0.0403954	GCST90274780	6	88557407	0.0121	1.51e-06	6_88557407_A_G	14295	C-X-C motif chemokine 10 levels	0.00161603	0.00158709	22.7203	41.8887	23.1353
rs12476448	T	C	T	C	0.0536	0.0212236	0.4864	0.5051	kidney cancer	0.5842	0.0387816	GCST90274780	2	14400474	0.0115	3.15e-06	2_14400474_T_C	14737	C-X-C motif chemokine 10 levels	0.00147212	0.00143542	21.1813	41.8887	21.7237
rs12629593	T	G	T	G	-0.0879	-0.0728786	0.1209	0.1339	kidney cancer	0.2559	0.0641461	GCST90274780	3	54104178	0.0182	1.37e-06	3_54104178_T_G	14744	C-X-C motif chemokine 10 levels	0.00157976	0.00164237	24.2517	41.8887	23.3257
rs12646113	T	C	T	C	0.0977	-0.00060018	0.246	0.2352	kidney cancer	0.9906	0.0509429	GCST90274780	4	77175245	0.0136	6.78e-13	4_77175245_T_C	14743	C-X-C motif chemokine 10 levels	0.00348872	0.003541	52.3833	41.8887	51.6073
rs150519056	T	C	T	C	-0.1841	0.0960372	0.9688	0.97239	kidney cancer	0.5175	0.148388	GCST90274780	22	50774821	0.0376	9.77e-07	22_50774821_T_C	13661	C-X-C motif chemokine 10 levels	0.00175207	0.00204893	28.0437	41.8887	23.9735
rs1563171	A	G	A	G	0.0592	0.0001	0.7042	0.7239	kidney cancer	0.9987	0.0613726	GCST90274780	2	3891773	0.0127	3.14e-06	2_3891773_A_G	14740	C-X-C motif chemokine 10 levels	0.00147217	0.00146005	21.5497	41.8887	21.7288
rs2164693	A	G	A	G	-0.1736	0.0836976	0.9625	0.98262	kidney cancer	0.5669	0.146165	GCST90274780	2	139887164	0.0393	9.99e-06	2_139887164_A_G	14296	C-X-C motif chemokine 10 levels	0.00136323	0.00217551	31.1646	41.8887	19.5126
rs2523495	T	C	T	C	0.1095	-0.0934903	0.1048	0.0818	kidney cancer	0.1137	0.0591045	GCST90274780	6	31377978	0.0196	2.31e-08	6_31377978_T_C	14743	C-X-C motif chemokine 10 levels	0.00211286	0.00224978	33.2388	41.8887	31.2116
rs3184504	T	C	T	C	0.1138	-0.0321101	0.4756	0.4663	kidney cancer	0.4077	0.0387827	GCST90274780	12	111884608	0.0131	3.72e-18	12_111884608_T_C	11793	C-X-C motif chemokine 10 levels	0.00635946	0.0064598	76.6627	41.8887	75.4644
rs3846056	A	G	A	G	-0.0559	-0.0572055	0.3248	0.316	kidney cancer	0.1704	0.0417278	GCST90274780	3	134227292	0.0124	6.54e-06	3_134227292_A_G	14296	C-X-C motif chemokine 10 levels	0.00141974	0.00137057	19.6179	41.8887	20.3226
rs4367871	T	C	T	C	-0.0567	0.0480354	0.5587	0.591	kidney cancer	0.2284	0.0398803	GCST90274780	10	1845059	0.0119	1.89e-06	10_1845059_T_C	14296	C-X-C motif chemokine 10 levels	0.00158573	0.00158529	22.6961	41.8887	22.7024
rs4804148	T	C	T	C	-0.0629	0.027988	0.7227	0.7556	kidney cancer	0.5286	0.0444153	GCST90274780	19	11270867	0.013	1.31e-06	19_11270867_T_C	14744	C-X-C motif chemokine 10 levels	0.00158551	0.00158577	23.4145	41.8887	23.4107
rs55732300	A	G	A	G	0.1175	-0.0997098	0.929	0.93661	kidney cancer	0.1677	0.0722728	GCST90274780	11	73731422	0.025	2.6e-06	11_73731422_A_G	14730	C-X-C motif chemokine 10 levels	0.00149762	0.00182129	26.8729	41.8887	22.09
rs59465157	A	G	A	G	0.1295	0.0296348	0.0442	0.04499	kidney cancer	0.7544	0.0947274	GCST90274780	5	115740808	0.0287	6.42e-06	5_115740808_A_G	14744	C-X-C motif chemokine 10 levels	0.00137918	0.00141696	20.9185	41.8887	20.3599
rs61811733	C	G	C	G	-0.1436	-0.0356272	0.9616	0.96626	kidney cancer	0.7311	0.103669	GCST90274780	1	181143447	0.0324	9.33e-06	1_181143447_C_G	14738	C-X-C motif chemokine 10 levels	0.00133125	0.00152288	22.4753	41.8887	19.6435
rs62208309	T	C	T	C	-0.1371	-0.0160702	0.0542	0.06033	kidney cancer	0.8695	0.0978138	GCST90274780	20	51942555	0.0309	9.13e-06	20_51942555_T_C	14296	C-X-C motif chemokine 10 levels	0.00137533	0.0019271	27.5991	41.8887	19.686
rs72651343	T	C	T	C	-0.6096	0.1049	0.9892	0.98671	kidney cancer	0.6257	0.215053	GCST90274780	4	76808216	0.0619	6.98e-23	4_76808216_T_C	14257	C-X-C motif chemokine 10 levels	0.00675766	0.00794013	114.093	41.8887	96.9859
rs72682331	A	G	A	G	0.1089	-0.0804734	0.0979	0.06033	kidney cancer	0.2699	0.0729393	GCST90274780	4	112904535	0.0209	1.88e-07	4_112904535_A_G	14731	C-X-C motif chemokine 10 levels	0.00183988	0.00209471	30.9177	41.8887	27.1496
rs741344	A	G	A	G	-0.06	-0.0726927	0.7036	0.7188	kidney cancer	0.08962	0.0428258	GCST90274780	12	68597086	0.013	3.92e-06	12_68597086_A_G	14296	C-X-C motif chemokine 10 levels	0.00148804	0.00150154	21.4953	41.8887	21.3018
rs74956615	A	T	A	T	-0.1358	-0.121598	0.0495	0.03067	kidney cancer	0.2236	0.0999153	GCST90274780	19	10427721	0.0294	3.86e-06	19_10427721_A_T	13671	C-X-C motif chemokine 10 levels	0.00155844	0.00173535	23.7617	41.8887	21.3356
rs76484468	T	C	T	C	-0.2168	0.00259663	0.9792	0.98262	kidney cancer	0.9859	0.146929	GCST90274780	2	227559824	0.0482	6.86e-06	2_227559824_T_C	14744	C-X-C motif chemokine 10 levels	0.00137048	0.00191462	28.2795	41.8887	20.2313
rs820963	C	G	C	G	-0.0539	-0.03015	0.3617	0.3722	kidney cancer	0.4503	0.0399382	GCST90274780	2	57744868	0.0122	9.96e-06	2_57744868_C_G	14732	C-X-C motif chemokine 10 levels	0.00132337	0.00134147	19.7864	41.8887	19.519
rs10733789	T	C	T	C	-0.0815	-0.0288111	0.6875	0.6656	kidney cancer	0.4891	0.0416501	GCST90274781	10	64948684	0.0127	1.39e-10	10_64948684_T_C	14287	C-X-C motif chemokine 11 levels	0.0028746	0.00285409	40.8874	41.8887	41.182
rs10876335	C	G	C	G	0.0607	0.00269636	0.3069	0.2975	kidney cancer	0.9504	0.0433467	GCST90274781	12	53150540	0.0133	5.02e-06	12_53150540_C_G	13240	C-X-C motif chemokine 11 levels	0.00157097	0.00156747	20.7828	41.8887	20.8293
rs10898158	A	G	A	G	0.0609	-0.0692429	0.6028	0.5971	kidney cancer	0.07658	0.0391008	GCST90274781	11	83554112	0.0121	4.83e-07	11_83554112_A_G	14288	C-X-C motif chemokine 11 levels	0.00177004	0.00177602	25.4173	41.8887	25.3317
rs111787182	A	C	A	C	-0.1445	0.0732505	0.951	0.9591	kidney cancer	0.4609	0.0993408	GCST90274781	7	157911633	0.0314	4.19e-06	7_157911633_A_C	13224	C-X-C motif chemokine 11 levels	0.00159913	0.001946	25.7801	41.8887	21.1776
rs111848253	A	G	A	G	-0.1162	-0.0915672	0.9044	0.91002	kidney cancer	0.5669	0.159908	GCST90274781	11	22351553	0.025	3.35e-06	11_22351553_A_G	11538	C-X-C motif chemokine 11 levels	0.00186924	0.00233486	26.998	41.8887	21.6039
rs112884138	T	C	T	C	-0.0976	0.0640053	0.0892	0.1033	kidney cancer	0.319	0.0642292	GCST90274781	4	134362360	0.0209	3.01e-06	4_134362360_T_C	14728	C-X-C motif chemokine 11 levels	0.0014787	0.00154781	22.8284	41.8887	21.8076
rs114013730	A	G	A	G	0.3893	-0.42129	0.9892	0.98569	kidney cancer	0.3484	0.449281	GCST90274781	2	112444622	0.0853	5.02e-06	2_112444622_A_G	11961	C-X-C motif chemokine 11 levels	0.00173868	0.00323822	38.8517	41.8887	20.8291
rs115344667	T	C	T	C	-0.1344	-0.045102	0.9568	0.96933	kidney cancer	0.6111	0.0886954	GCST90274781	2	78400313	0.0302	8.57e-06	2_78400313_T_C	14736	C-X-C motif chemokine 11 levels	0.0013424	0.00149325	22.0345	41.8887	19.8054
rs116470923	T	C	T	C	-0.1975	-0.0595888	0.0216	0.01636	kidney cancer	0.6474	0.130284	GCST90274781	4	77374393	0.0427	3.74e-06	4_77374393_T_C	14736	C-X-C motif chemokine 11 levels	0.00144987	0.00164867	24.3317	41.8887	21.3933
rs11754031	T	C	T	C	0.0542	0.00190181	0.357	0.3364	kidney cancer	0.9629	0.0408861	GCST90274781	6	88567494	0.0122	8.89e-06	6_88567494_T_C	14288	C-X-C motif chemokine 11 levels	0.00137965	0.00134868	19.2932	41.8887	19.7369
rs12433317	A	G	A	G	0.0571	-0.0117309	0.4282	0.4029	kidney cancer	0.7669	0.0395737	GCST90274781	14	50775476	0.012	1.95e-06	14_50775476_A_G	14288	C-X-C motif chemokine 11 levels	0.00158238	0.00159659	22.8453	41.8887	22.6417
rs12998222	T	C	T	C	0.2339	-0.0569937	0.9855	0.98671	kidney cancer	0.6997	0.147757	GCST90274781	2	153497193	0.0528	9.43e-06	2_153497193_T_C	13801	C-X-C motif chemokine 11 levels	0.00142013	0.00156356	21.6094	41.8887	19.6242
rs144908342	A	G	A	G	-0.1763	-0.0529719	0.0292	0.02761	kidney cancer	0.6663	0.122839	GCST90274781	17	71105507	0.0394	7.65e-06	17_71105507_A_G	14727	C-X-C motif chemokine 11 levels	0.0013579	0.00176217	25.9937	41.8887	20.0222
rs148828177	T	C	T	C	-0.1509	-0.107059	0.0385	0.03885	kidney cancer	0.3544	0.115604	GCST90274781	2	240244812	0.034	9.07e-06	2_240244812_T_C	14732	C-X-C motif chemokine 11 levels	0.00133548	0.00168585	24.8745	41.8887	19.6979
rs17466177	T	C	T	C	-0.1822	0.191116	0.9741	0.9816	kidney cancer	0.1567	0.134944	GCST90274781	1	222852472	0.0409	8.4e-06	1_222852472_T_C	14723	C-X-C motif chemokine 11 levels	0.00134626	0.00167506	24.6999	41.8887	19.845
rs17824652	T	C	T	C	0.1168	0.0689662	0.9406	0.94274	kidney cancer	0.3916	0.0805003	GCST90274781	20	41987913	0.0258	5.98e-06	20_41987913_T_C	14288	C-X-C motif chemokine 11 levels	0.00143256	0.00152443	21.8112	41.8887	20.4949
rs185516256	T	C	T	C	0.1566	0.134006	0.9575	0.98466	kidney cancer	0.306	0.13091	GCST90274781	1	51541675	0.0349	7.22e-06	1_51541675_T_C	14288	C-X-C motif chemokine 11 levels	0.00140738	0.00199591	28.5706	41.8887	20.1341
rs191536201	A	G	A	G	-0.3323	0.152336	0.0117	0.02454	kidney cancer	0.4108	0.185214	GCST90274781	20	17839484	0.0684	1.18e-06	20_17839484_A_G	11194	C-X-C motif chemokine 11 levels	0.00210439	0.00255367	28.6539	41.8887	23.602
rs2013836	A	C	A	C	0.1383	0.0278852	0.0402	0.03476	kidney cancer	0.7761	0.0980475	GCST90274781	1	181142796	0.0309	7.62e-06	1_181142796_A_C	14732	C-X-C motif chemokine 11 levels	0.00135811	0.00147598	21.7734	41.8887	20.0321
rs2245786	A	G	A	G	-0.0599	-0.0103463	0.6525	0.6299	kidney cancer	0.8233	0.0463331	GCST90274781	20	4795382	0.0131	4.82e-06	20_4795382_A_G	14721	C-X-C motif chemokine 11 levels	0.00141846	0.00162712	23.9886	41.8887	20.9079
rs2678131	T	C	T	C	-0.1497	0.135133	0.0348	0.04192	kidney cancer	0.1889	0.102853	GCST90274781	12	43091649	0.033	5.72e-06	12_43091649_T_C	14720	C-X-C motif chemokine 11 levels	0.00139624	0.00150546	22.1908	41.8887	20.5786
rs3184504	T	C	T	C	0.1236	-0.0321101	0.4764	0.4663	kidney cancer	0.4077	0.0387827	GCST90274781	12	111884608	0.0132	7.7e-21	12_111884608_T_C	11785	C-X-C motif chemokine 11 levels	0.00738607	0.00762146	90.4934	41.8887	87.6777
rs371789589	A	G	A	G	0.154	0.0296348	0.0398	0.0317	kidney cancer	0.8015	0.117876	GCST90274781	13	53082648	0.034	5.91e-06	13_53082648_A_G	12189	C-X-C motif chemokine 11 levels	0.00168057	0.00181266	22.131	41.8887	20.5156
rs374784992	A	G	A	G	0.1349	0.144879	0.9402	0.94888	kidney cancer	0.1565	0.102248	GCST90274781	4	119585039	0.0297	5.57e-06	4_119585039_A_G	11760	C-X-C motif chemokine 11 levels	0.00175152	0.00204633	24.1101	41.8887	20.6306
rs4748380	T	C	T	C	0.0901	0.0277124	0.1188	0.1002	kidney cancer	0.6579	0.0625825	GCST90274781	10	17590681	0.019	2.12e-06	10_17590681_T_C	14732	C-X-C motif chemokine 11 levels	0.00152432	0.00169969	25.0791	41.8887	22.4876
rs59148364	A	G	A	G	0.1821	0.184163	0.0278	0.02454	kidney cancer	0.1182	0.117874	GCST90274781	4	77130802	0.0378	1.45e-06	4_77130802_A_G	14721	C-X-C motif chemokine 11 levels	0.00157425	0.00179246	26.4306	41.8887	23.2079
rs60141220	A	G	A	G	-0.0777	-0.022544	0.1703	0.1851	kidney cancer	0.6587	0.0510381	GCST90274781	1	26395741	0.0165	2.49e-06	1_26395741_A_G	13221	C-X-C motif chemokine 11 levels	0.00167474	0.00170611	22.5917	41.8887	22.1755
rs62291421	C	G	C	G	0.2674	0.167631	0.9763	0.98569	kidney cancer	0.3392	0.175392	GCST90274781	3	188015332	0.0518	2.44e-07	3_188015332_C_G	12305	C-X-C motif chemokine 11 levels	0.00216129	0.00330891	40.8446	41.8887	26.6479
rs6827617	A	G	A	G	-0.1724	0.0295318	0.6041	0.5757	kidney cancer	0.4574	0.0397395	GCST90274781	4	76916146	0.0118	2.42e-48	4_76916146_A_G	14718	C-X-C motif chemokine 11 levels	0.0142977	0.0142167	212.23	41.8887	213.457
rs7009937	T	C	T	C	0.1175	-0.0242047	0.9321	0.9274	kidney cancer	0.7447	0.0743306	GCST90274781	8	96176796	0.025	2.6e-06	8_96176796_T_C	14288	C-X-C motif chemokine 11 levels	0.00154388	0.00174758	25.0097	41.8887	22.09
rs7222922	T	C	T	C	-0.0882	-0.0896579	0.1205	0.1268	kidney cancer	0.1658	0.0646963	GCST90274781	17	34335694	0.0182	1.26e-06	17_34335694_T_C	14726	C-X-C motif chemokine 11 levels	0.00159249	0.00164888	24.3183	41.8887	23.4852
rs72747175	A	G	A	G	0.1535	0.11181	0.9608	0.96728	kidney cancer	0.3494	0.119486	GCST90274781	5	18009856	0.0326	2.49e-06	5_18009856_A_G	14730	C-X-C motif chemokine 11 levels	0.00150309	0.00177487	26.1867	41.8887	22.1708
rs72925566	A	G	A	G	-0.0973	0.0466724	0.1651	0.1667	kidney cancer	0.3797	0.0531305	GCST90274781	6	89498971	0.0185	1.44e-07	6_89498971_A_G	11337	C-X-C motif chemokine 11 levels	0.00243446	0.00260998	29.6615	41.8887	27.6619
rs7475335	A	C	A	C	-0.0646	-0.0511683	0.3172	0.3517	kidney cancer	0.2175	0.0414922	GCST90274781	10	104343428	0.0124	1.89e-07	10_104343428_A_C	14735	C-X-C motif chemokine 11 levels	0.00183879	0.00180768	26.6808	41.8887	27.1407
rs7750544	T	C	T	C	-0.0773	0.0767731	0.165	0.1851	kidney cancer	0.1839	0.0577744	GCST90274781	6	154177484	0.0164	2.44e-06	6_154177484_T_C	13644	C-X-C motif chemokine 11 levels	0.00162587	0.00164649	22.4985	41.8887	22.2163
rs77516076	C	G	C	G	0.1915	0.157824	0.0233	0.01738	kidney cancer	0.253	0.138068	GCST90274781	10	50895131	0.0432	9.3e-06	10_50895131_C_G	14730	C-X-C motif chemokine 11 levels	0.00133244	0.00166911	24.6237	41.8887	19.6503
rs78632565	T	C	T	C	0.1082	0.0452601	0.9152	0.92025	kidney cancer	0.563	0.0782518	GCST90274781	8	70982905	0.0214	4.28e-07	8_70982905_T_C	14722	C-X-C motif chemokine 11 levels	0.00173367	0.00181717	26.7975	41.8887	25.5639
rs79378014	A	T	A	T	-0.1549	0.0170444	0.0325	0.03988	kidney cancer	0.8777	0.11076	GCST90274781	3	114380762	0.0341	5.56e-06	3_114380762_A_T	14734	C-X-C motif chemokine 11 levels	0.0013987	0.00150892	22.2631	41.8887	20.6345
rs10403201	A	G	A	G	-0.0601	0.00461061	0.2925	0.3037	kidney cancer	0.9121	0.0417665	GCST90274782	19	14764810	0.0127	2.22e-06	19_14764810_A_G	14730	C-X-C motif chemokine 5 levels	0.00151823	0.00149497	22.0508	41.8887	22.3945
rs10821552	A	C	A	C	-0.1132	-0.0384512	0.3353	0.3701	kidney cancer	0.4184	0.0475175	GCST90274782	9	136939992	0.0156	3.97e-13	9_136939992_A_C	9841	C-X-C motif chemokine 5 levels	0.00532322	0.00571192	56.5224	41.8887	52.6555
rs111848253	A	G	A	G	-0.1111	-0.0915672	0.9045	0.91002	kidney cancer	0.5669	0.159908	GCST90274782	11	22351553	0.0249	8.13e-06	11_22351553_A_G	11538	C-X-C motif chemokine 5 levels	0.00172276	0.00213241	24.652	41.8887	19.9081
rs11734099	A	G	A	G	0.0769	0.0131866	0.1845	0.1667	kidney cancer	0.821	0.0582808	GCST90274782	4	6891435	0.0153	5e-07	4_6891435_A_G	14731	C-X-C motif chemokine 5 levels	0.00171219	0.00177952	26.2573	41.8887	25.2621
rs11779495	A	G	A	G	0.1153	-0.0690595	0.0709	0.06646	kidney cancer	0.3923	0.0807285	GCST90274782	8	81858024	0.0253	5.18e-06	8_81858024_A_G	14288	C-X-C motif chemokine 5 levels	0.0014517	0.00175145	25.0651	41.8887	20.7691
rs140828666	A	G	A	G	-0.1474	0.0181346	0.9544	0.96626	kidney cancer	0.8583	0.101572	GCST90274782	13	53109423	0.0322	4.7e-06	13_53109423_A_G	12401	C-X-C motif chemokine 5 levels	0.00168719	0.00189113	23.4925	41.8887	20.9548
rs146553494	A	G	A	G	0.1844	0.0251127	0.0265	0.02658	kidney cancer	0.8358	0.12116	GCST90274782	3	183850210	0.0377	1e-06	3_183850210_A_G	14733	C-X-C motif chemokine 5 levels	0.00162145	0.00175442	25.8898	41.8887	23.9243
rs2004100	T	C	T	C	0.0675	0.0190809	0.2492	0.2413	kidney cancer	0.7148	0.0522167	GCST90274782	8	144554731	0.0147	4.39e-06	8_144554731_T_C	13224	C-X-C motif chemokine 5 levels	0.00159215	0.00170494	22.5813	41.8887	21.085
rs2647400	C	G	C	G	0.0631	0.0858107	0.2784	0.2955	kidney cancer	0.04676	0.0431542	GCST90274782	6	76351999	0.013	1.21e-06	6_76351999_C_G	14734	C-X-C motif chemokine 5 levels	0.00159667	0.00159976	23.6054	41.8887	23.5598
rs28750249	T	G	T	G	-0.118	0.0260575	0.945	0.95297	kidney cancer	0.761	0.0856683	GCST90274782	4	23807061	0.0266	9.16e-06	4_23807061_T_G	14735	C-X-C motif chemokine 5 levels	0.00133392	0.0014474	21.3555	41.8887	19.6789
rs3183927	A	G	A	G	-0.0619	0.0495518	0.6436	0.589	kidney cancer	0.2218	0.0405578	GCST90274782	9	100684757	0.0121	3.13e-07	9_100684757_A_G	14725	C-X-C motif chemokine 5 levels	0.00177436	0.00175778	25.9254	41.8887	26.1704
rs425535	T	C	T	C	0.5063	-0.002002	0.1127	0.1135	kidney cancer	0.973	0.0591504	GCST90274782	4	74863997	0.0181	3.52e-172	4_74863997_T_C	14731	C-X-C motif chemokine 5 levels	0.0504436	0.0512673	795.92	41.8887	782.454
rs4279906	T	C	T	C	0.2082	0.239174	0.0209	0.03272	kidney cancer	0.04789	0.120896	GCST90274782	1	211477063	0.042	7.15e-07	1_211477063_T_C	14717	C-X-C motif chemokine 5 levels	0.00166716	0.00177405	26.1515	41.8887	24.5733
rs571211418	A	G	A	G	0.078	-0.0457379	0.1827	0.1759	kidney cancer	0.4353	0.0586267	GCST90274782	1	162778011	0.0172	5.76e-06	1_162778011_A_G	11760	C-X-C motif chemokine 5 levels	0.00174598	0.00181693	21.4024	41.8887	20.5652
rs59312158	A	G	A	G	-0.19	-0.113507	0.0309	0.02761	kidney cancer	0.4849	0.162515	GCST90274782	16	88582345	0.0385	8.01e-07	16_88582345_A_G	13672	C-X-C motif chemokine 5 levels	0.00177846	0.00216204	29.6192	41.8887	24.3549
rs6993770	A	T	A	T	-0.1058	-0.00904074	0.7312	0.7025	kidney cancer	0.8332	0.0429287	GCST90274782	8	106581528	0.0135	4.61e-15	8_106581528_A_T	14288	C-X-C motif chemokine 5 levels	0.00428085	0.00440014	63.1383	41.8887	61.4191
rs7197943	A	C	A	C	0.0552	0.00229736	0.6522	0.6605	kidney cancer	0.9555	0.0411703	GCST90274782	16	64226202	0.0123	7.2e-06	16_64226202_A_C	14719	C-X-C motif chemokine 5 levels	0.00136664	0.00138235	20.3722	41.8887	20.1404
rs7636889	A	G	A	G	-0.0768	-0.0176434	0.7593	0.771	kidney cancer	0.6994	0.0456929	GCST90274782	3	56874033	0.0137	2.07e-08	3_56874033_A_G	14733	C-X-C motif chemokine 5 levels	0.00212875	0.00215597	31.8282	41.8887	31.4254
rs7781261	A	G	A	G	-0.0675	0.0142973	0.8155	0.8088	kidney cancer	0.7725	0.0494534	GCST90274782	7	111992684	0.0151	7.81e-06	7_111992684_A_G	14728	C-X-C motif chemokine 5 levels	0.00135513	0.00137106	20.218	41.8887	19.9827
rs79649467	T	G	T	G	-0.1721	0.0110609	0.0605	0.06339	kidney cancer	0.9046	0.092288	GCST90274782	4	74880852	0.0276	4.5e-10	4_74880852_T_G	14288	C-X-C motif chemokine 5 levels	0.00271427	0.00336701	48.2636	41.8887	38.8816
rs916776	T	G	T	G	0.0546	0.0761254	0.3883	0.3834	kidney cancer	0.05674	0.0399544	GCST90274782	16	26812516	0.0122	7.63e-06	16_26812516_T_G	14287	C-X-C motif chemokine 5 levels	0.00140016	0.00141619	20.2589	41.8887	20.0293
rs9429422	T	C	T	C	0.0601	-0.0188218	0.2633	0.2474	kidney cancer	0.6807	0.0457385	GCST90274782	1	112467126	0.0135	8.51e-06	1_112467126_T_C	14288	C-X-C motif chemokine 5 levels	0.00138538	0.00140127	20.0466	41.8887	19.819
rs12075	A	G	A	G	0.0816	-0.0557185	0.5554	0.6053	kidney cancer	0.1542	0.0391048	GCST90274783	1	159175354	0.0115	1.29e-12	1_159175354_A_G	14741	C-X-C motif chemokine 6 levels	0.00340436	0.00328841	48.6277	41.8887	50.3483
rs13148728	T	C	T	C	-0.4178	-0.0232281	0.5539	0.5706	kidney cancer	0.5569	0.0395404	GCST90274783	4	74711126	0.0118	1.34e-274	4_74711126_T_C	14296	C-X-C motif chemokine 6 levels	0.0806322	0.0862642	1349.47	41.8887	1253.64
rs377588320	A	C	A	C	-0.3485	-0.361831	0.9837	0.98057	kidney cancer	0.06138	0.193415	GCST90274783	22	35739167	0.0719	1.25e-06	22_35739167_A_C	10271	C-X-C motif chemokine 6 levels	0.00228259	0.00389481	40.1521	41.8887	23.4935
rs597808	A	G	A	G	0.0655	-0.0349021	0.4781	0.4683	kidney cancer	0.3732	0.039194	GCST90274783	12	111973358	0.0135	1.22e-06	12_111973358_A_G	11344	C-X-C motif chemokine 6 levels	0.00207121	0.00214101	24.3354	41.8887	23.5405
rs74361503	T	C	T	C	-0.2873	-0.0986682	0.0558	0.05419	kidney cancer	0.2851	0.0923053	GCST90274783	4	74667328	0.027	1.93e-26	4_74667328_T_C	14739	C-X-C motif chemokine 6 levels	0.00762449	0.0086976	129.301	41.8887	113.225
rs9371716	T	C	T	C	-0.0919	0.0077298	0.1328	0.1605	kidney cancer	0.9053	0.0649733	GCST90274783	6	154000019	0.0193	1.92e-06	6_154000019_T_C	12412	C-X-C motif chemokine 6 levels	0.00182369	0.00194526	24.1878	41.8887	22.6734
rs10921271	A	G	A	G	0.0626	-0.0202027	0.6904	0.7076	kidney cancer	0.8679	0.121464	GCST90274784	1	192799276	0.0138	5.73e-06	1_192799276_A_G	12404	C-X-C motif chemokine 9 levels	0.00165645	0.00167525	20.8114	41.8887	20.5774
rs11130569	A	G	A	G	-0.051	-0.00190181	0.4547	0.4141	kidney cancer	0.9618	0.0397079	GCST90274784	3	57075894	0.0114	7.69e-06	3_57075894_A_G	14727	C-X-C motif chemokine 9 levels	0.00135733	0.00128983	19.0172	41.8887	20.0139
rs113504136	T	G	T	G	-0.1494	0.0760175	0.0325	0.02454	kidney cancer	0.5173	0.117399	GCST90274784	10	13400390	0.0338	9.86e-06	10_13400390_T_G	14723	C-X-C motif chemokine 9 levels	0.00132542	0.00140367	20.6925	41.8887	19.5374
rs114033894	T	G	T	G	-0.2245	0.0345946	0.981	0.97342	kidney cancer	0.832	0.163077	GCST90274784	2	86977227	0.0488	4.22e-06	2_86977227_T_G	14287	C-X-C motif chemokine 9 levels	0.00147935	0.00187882	26.8895	41.8887	21.1638
rs118106660	A	G	A	G	0.259	-0.619501	0.0138	0.01227	kidney cancer	0.2724	0.564438	GCST90274784	14	54798313	0.0573	6.18e-06	14_54798313_A_G	13800	C-X-C motif chemokine 9 levels	0.00147854	0.00182589	25.2397	41.8887	20.431
rs12191307	A	G	A	G	-0.1452	0.00270365	0.098	0.1002	kidney cancer	0.9656	0.0626899	GCST90274784	6	161256529	0.0197	1.7e-13	6_161256529_A_G	14287	C-X-C motif chemokine 9 levels	0.00378854	0.00372731	53.4439	41.8887	54.3251
rs142119726	T	C	T	C	0.2705	-0.0377019	0.9851	0.98262	kidney cancer	0.8597	0.213299	GCST90274784	7	48859798	0.0551	9.14e-07	7_48859798_T_C	13800	C-X-C motif chemokine 9 levels	0.00174364	0.00214798	29.7017	41.8887	24.1008
rs145607633	T	C	T	C	0.0728	-0.0861777	0.1625	0.1708	kidney cancer	0.1097	0.0538764	GCST90274784	5	19287867	0.0154	2.28e-06	5_19287867_T_C	14287	C-X-C motif chemokine 9 levels	0.00156193	0.00144255	20.6366	41.8887	22.3471
rs1758695	T	G	T	G	0.0511	-0.013311	0.5681	0.5818	kidney cancer	0.734	0.039172	GCST90274784	9	94165889	0.0115	8.85e-06	9_94165889_T_G	14732	C-X-C motif chemokine 9 levels	0.00133863	0.00128138	18.899	41.8887	19.7445
rs181816009	A	G	A	G	-0.1603	0.0546674	0.0378	0.02761	kidney cancer	0.6516	0.121069	GCST90274784	6	31423412	0.0342	2.77e-06	6_31423412_A_G	11985	C-X-C motif chemokine 9 levels	0.00183001	0.00186919	22.4405	41.8887	21.9692
rs182152471	T	C	T	C	0.1861	0.101811	0.028	0.04192	kidney cancer	0.4549	0.136244	GCST90274784	16	1803589	0.0385	1.34e-06	16_1803589_T_C	13667	C-X-C motif chemokine 9 levels	0.00170695	0.00188515	25.8093	41.8887	23.3653
rs192488790	T	C	T	C	0.2369	0.140642	0.0168	0.02045	kidney cancer	0.3626	0.15448	GCST90274784	11	7767109	0.0532	8.47e-06	11_7767109_T_C	13421	C-X-C motif chemokine 9 levels	0.00147552	0.00185401	24.9251	41.8887	19.8293
rs2535260	C	G	C	G	0.0642	0.10481	0.8128	0.7904	kidney cancer	0.04002	0.0510388	GCST90274784	6	29628883	0.0144	8.26e-06	6_29628883_C_G	14735	C-X-C motif chemokine 9 levels	0.00134731	0.00125427	18.5023	41.8887	19.8767
rs3184504	T	C	T	C	0.1008	-0.0321101	0.4744	0.4663	kidney cancer	0.4077	0.0387827	GCST90274784	12	111884608	0.013	8.92e-15	12_111884608_T_C	11784	C-X-C motif chemokine 9 levels	0.00507697	0.005067	60.0035	41.8887	60.1221
rs35435997	A	G	A	G	0.0915	0.320619	0.1125	0.1104	kidney cancer	0.09408	0.191499	GCST90274784	2	242665455	0.02	4.76e-06	2_242665455_A_G	12791	C-X-C motif chemokine 9 levels	0.00163394	0.00167183	21.4169	41.8887	20.9306
rs368022534	A	G	A	G	0.1686	-0.0682788	0.9563	0.95297	kidney cancer	0.5429	0.112221	GCST90274784	11	102612924	0.0371	5.51e-06	11_102612924_A_G	9256	C-X-C motif chemokine 9 levels	0.00222674	0.00237586	22.0386	41.8887	20.6522
rs4241577	A	C	A	C	-0.1419	-0.0489806	0.2629	0.2546	kidney cancer	0.2856	0.0458696	GCST90274784	4	76930776	0.0128	1.47e-28	4_76930776_A_C	14724	C-X-C motif chemokine 9 levels	0.00827881	0.0078039	115.793	41.8887	122.898
rs4888966	C	G	C	G	-0.157	0.151637	0.9683	0.97751	kidney cancer	0.3498	0.162183	GCST90274784	16	79431853	0.0343	4.71e-06	16_79431853_C_G	14287	C-X-C motif chemokine 9 levels	0.00146452	0.00151321	21.6489	41.8887	20.9513
rs58524610	T	G	T	G	0.223	-0.356975	0.0204	0.01125	kidney cancer	0.4735	0.498015	GCST90274784	12	11768143	0.0491	5.58e-06	12_11768143_T_G	14287	C-X-C motif chemokine 9 levels	0.00144192	0.00198755	28.4487	41.8887	20.6275
rs61875680	A	G	A	G	-0.0758	0.0672087	0.1611	0.1564	kidney cancer	0.2097	0.0535788	GCST90274784	10	107966626	0.0158	1.61e-06	10_107966626_A_G	14287	C-X-C motif chemokine 9 levels	0.00160859	0.00155301	22.2192	41.8887	23.0157
rs62200304	A	C	A	C	-0.115	0.0234235	0.9336	0.91104	kidney cancer	0.7639	0.0779839	GCST90274784	20	20119931	0.0244	2.44e-06	20_20119931_A_C	14287	C-X-C motif chemokine 9 levels	0.00155261	0.00163966	23.4611	41.8887	22.2135
rs62272916	A	G	A	G	-0.0834	-0.047742	0.1182	0.1084	kidney cancer	0.6958	0.122103	GCST90274784	3	151541803	0.0176	2.15e-06	3_151541803_A_G	14710	C-X-C motif chemokine 9 levels	0.00152437	0.00144994	21.3567	41.8887	22.4547
rs6548432	A	G	A	G	-0.0514	0.001998	0.4276	0.4305	kidney cancer	0.9595	0.0393454	GCST90274784	3	76525063	0.0114	6.52e-06	3_76525063_A_G	14724	C-X-C motif chemokine 9 levels	0.00137896	0.00129328	19.0644	41.8887	20.329
rs656739	A	G	A	G	0.0562	-0.00501254	0.6566	0.6677	kidney cancer	0.9039	0.0415165	GCST90274784	7	29049949	0.0119	2.33e-06	7_29049949_A_G	14735	C-X-C motif chemokine 9 levels	0.00151158	0.00142431	21.0143	41.8887	22.3038
rs6586167	T	G	T	G	-0.052	0.0215658	0.5056	0.5348	kidney cancer	0.5785	0.0388169	GCST90274784	10	90756146	0.0114	5.08e-06	10_90756146_T_G	14735	C-X-C motif chemokine 9 levels	0.00141024	0.00135183	19.9435	41.8887	20.8064
rs72991127	C	G	C	G	-0.0583	-0.02137	0.264	0.2975	kidney cancer	0.6436	0.0461884	GCST90274784	2	236906094	0.0131	8.57e-06	2_236906094_C_G	14287	C-X-C motif chemokine 9 levels	0.00138456	0.00132084	18.8931	41.8887	19.8059
rs73194812	A	G	A	G	0.1821	0.0556239	0.9758	0.97239	kidney cancer	0.6644	0.128211	GCST90274784	21	18734554	0.0391	3.2e-06	21_18734554_A_G	14730	C-X-C motif chemokine 9 levels	0.00147056	0.00156612	23.1021	41.8887	21.6903
rs73367822	T	C	T	C	-0.0588	-0.00219758	0.5804	0.5828	kidney cancer	0.9613	0.0452902	GCST90274784	21	45024252	0.0126	3.06e-06	21_45024252_T_C	11760	C-X-C motif chemokine 9 levels	0.00184874	0.00168402	19.8341	41.8887	21.7778
rs73606147	A	C	A	C	0.2792	-0.36207	0.0133	0.01738	kidney cancer	0.4507	0.480041	GCST90274784	20	2538467	0.059	2.22e-06	20_2538467_A_C	13379	C-X-C motif chemokine 9 levels	0.00167125	0.00204596	27.4249	41.8887	22.3937
rs7429588	T	C	T	C	0.0592	0.0862694	0.706	0.7342	kidney cancer	0.3963	0.101703	GCST90274784	3	46835250	0.0134	9.97e-06	3_46835250_T_C	14285	C-X-C motif chemokine 9 levels	0.00136465	0.00145487	20.8102	41.8887	19.5179
rs74956615	A	T	A	T	-0.1309	-0.121598	0.049	0.03067	kidney cancer	0.2236	0.0999153	GCST90274784	19	10427721	0.0286	4.72e-06	19_10427721_A_T	13662	C-X-C motif chemokine 9 levels	0.0015312	0.00159693	21.849	41.8887	20.9482
rs75525140	C	G	C	G	-0.2062	0.220741	0.9819	0.98773	kidney cancer	0.2206	0.180206	GCST90274784	18	28624793	0.0465	9.23e-06	18_28624793_C_G	14725	C-X-C motif chemokine 9 levels	0.00133381	0.00151131	22.2847	41.8887	19.664
rs7600322	T	C	T	C	0.057	0.0524976	0.5214	0.4908	kidney cancer	0.1771	0.0388946	GCST90274784	2	204754353	0.0118	1.36e-06	2_204754353_T_C	13849	C-X-C motif chemokine 9 levels	0.00168228	0.00162152	22.4897	41.8887	23.3338
rs783149	A	C	A	C	-0.0805	0.00180162	0.1958	0.1309	kidney cancer	0.9726	0.0524527	GCST90274784	6	161088918	0.0144	2.27e-08	6_161088918_A_C	14287	C-X-C motif chemokine 9 levels	0.00218292	0.00204079	29.2123	41.8887	31.2512
rs79551873	T	C	T	C	0.0533	0.0149106	0.3563	0.3364	kidney cancer	0.7155	0.0409093	GCST90274784	2	231423737	0.0119	7.5e-06	2_231423737_T_C	14287	C-X-C motif chemokine 9 levels	0.0014024	0.00130312	18.6393	41.8887	20.0614
rs80348644	T	C	T	C	0.1546	0.131819	0.0336	0.02658	kidney cancer	0.2367	0.111401	GCST90274784	4	160574480	0.0332	3.21e-06	4_160574480_T_C	14734	C-X-C motif chemokine 9 levels	0.00146975	0.00155219	22.9024	41.8887	21.6842
rs9366778	A	G	A	G	-0.0605	-0.0935814	0.4075	0.4622	kidney cancer	0.02146	0.0406912	GCST90274784	6	31269173	0.0115	1.43e-07	6_31269173_A_G	14735	C-X-C motif chemokine 9 levels	0.00187503	0.00176749	26.0865	41.8887	27.6767
rs10191831	T	C	T	C	-0.0591	-0.0377774	0.4361	0.4847	kidney cancer	0.3419	0.0397482	GCST90274785	2	41864408	0.0125	2.27e-06	2_41864408_T_C	12403	Delta and Notch-like epidermal growth factor-related receptor levels	0.00179935	0.00171788	21.3401	41.8887	22.354
rs10892466	C	G	C	G	0.0808	0.0252152	0.1236	0.1145	kidney cancer	0.6845	0.0620561	GCST90274785	11	119661317	0.0175	3.89e-06	11_119661317_C_G	14732	Delta and Notch-like epidermal growth factor-related receptor levels	0.00144516	0.0014144	20.8637	41.8887	21.318
rs1133851	A	G	A	G	-0.0664	-0.0587405	0.2533	0.2403	kidney cancer	0.5281	0.0931045	GCST90274785	18	3722038	0.0142	2.92e-06	18_3722038_A_G	14286	Delta and Notch-like epidermal growth factor-related receptor levels	0.00152843	0.00166781	23.8628	41.8887	21.8655
rs116179073	T	C	T	C	-0.2481	0.150939	0.0138	0.01636	kidney cancer	0.3127	0.149508	GCST90274785	12	31458615	0.0537	3.84e-06	12_31458615_T_C	13800	Delta and Notch-like epidermal growth factor-related receptor levels	0.0015446	0.00167544	23.1565	41.8887	21.3454
rs116540722	A	G	A	G	-0.1726	-0.00925702	0.0313	0.04192	kidney cancer	0.9371	0.117303	GCST90274785	2	168312525	0.0381	5.89e-06	2_168312525_A_G	14735	Delta and Notch-like epidermal growth factor-related receptor levels	0.00139103	0.00180653	26.6638	41.8887	20.5226
rs116794986	A	G	A	G	0.2476	-0.0171462	0.9884	0.98569	kidney cancer	0.9287	0.191619	GCST90274785	3	99306038	0.0554	7.85e-06	3_99306038_A_G	14735	Delta and Notch-like epidermal growth factor-related receptor levels	0.00135395	0.0014058	20.7407	41.8887	19.9748
rs116927267	A	G	A	G	-0.1742	0.0203048	0.0257	0.02045	kidney cancer	0.8691	0.123207	GCST90274785	20	4054373	0.0389	7.53e-06	20_4054373_A_G	14734	Delta and Notch-like epidermal growth factor-related receptor levels	0.00135939	0.00151968	22.422	41.8887	20.0538
rs11725578	C	G	C	G	-0.0584	0.0178585	0.697	0.6769	kidney cancer	0.675	0.0425917	GCST90274785	4	160466825	0.0128	5.05e-06	4_160466825_C_G	14287	Delta and Notch-like epidermal growth factor-related receptor levels	0.0014551	0.00144056	20.6081	41.8887	20.8164
rs117343254	C	G	C	G	-0.1281	-0.125563	0.942	0.94785	kidney cancer	0.188	0.0953752	GCST90274785	7	152385669	0.0274	2.94e-06	7_152385669_C_G	14287	Delta and Notch-like epidermal growth factor-related receptor levels	0.00152775	0.00179311	25.6606	41.8887	21.8573
rs13107325	T	C	T	C	0.1066	-0.0281014	0.0697	0.07669	kidney cancer	0.7073	0.0748404	GCST90274785	4	103188709	0.0233	4.76e-06	4_103188709_T_C	14732	Delta and Notch-like epidermal growth factor-related receptor levels	0.001419	0.00147367	21.7392	41.8887	20.9316
rs194746	T	C	T	C	0.0528	-0.0616594	0.4849	0.4724	kidney cancer	0.1145	0.0390673	GCST90274785	14	69282887	0.0112	2.43e-06	14_69282887_T_C	14723	Delta and Notch-like epidermal growth factor-related receptor levels	0.00150744	0.00139265	20.5298	41.8887	22.2245
rs207671	A	G	A	G	0.1016	0.0864297	0.5359	0.5583	kidney cancer	0.02855	0.039472	GCST90274785	2	230256586	0.0117	3.83e-18	2_230256586_A_G	14287	Delta and Notch-like epidermal growth factor-related receptor levels	0.00525108	0.00513467	73.7274	41.8887	75.4077
rs2837988	A	C	A	C	0.0576	0.00954541	0.3578	0.3763	kidney cancer	0.814	0.0405723	GCST90274785	21	42619544	0.0118	1.05e-06	21_42619544_A_C	14733	Delta and Notch-like epidermal growth factor-related receptor levels	0.0016149	0.0015247	22.4947	41.8887	23.8276
rs28689968	T	C	T	C	0.0918	-0.0217615	0.1074	0.1196	kidney cancer	0.7377	0.0649789	GCST90274785	17	47247257	0.0184	6.07e-07	17_47247257_T_C	14733	Delta and Notch-like epidermal growth factor-related receptor levels	0.00168688	0.00161576	23.8403	41.8887	24.8914
rs35032874	T	G	T	G	0.132	0.129624	0.7027	0.6851	kidney cancer	0.1868	0.098192	GCST90274785	2	230309360	0.0132	1.52e-23	2_230309360_T_G	14287	Delta and Notch-like epidermal growth factor-related receptor levels	0.00695169	0.00728019	104.76	41.8887	100
rs35107184	T	G	T	G	0.0586	0.00179838	0.4047	0.3579	kidney cancer	0.9695	0.0470345	GCST90274785	2	113834459	0.013	6.55e-06	2_113834459_T_G	11759	Delta and Notch-like epidermal growth factor-related receptor levels	0.00172529	0.0016546	19.4854	41.8887	20.3193
rs62193248	A	T	A	T	0.213	-0.0361454	0.6507	0.6472	kidney cancer	0.3804	0.0412074	GCST90274785	2	230596917	0.0123	3.5e-67	2_230596917_A_T	14287	Delta and Notch-like epidermal growth factor-related receptor levels	0.0205611	0.0206238	300.815	41.8887	299.881
rs62253189	A	G	A	G	-0.108	-0.11586	0.9404	0.95297	kidney cancer	0.1515	0.0807806	GCST90274785	3	69959680	0.0244	9.59e-06	3_69959680_A_G	14718	Delta and Notch-like epidermal growth factor-related receptor levels	0.00132954	0.00130748	19.2661	41.8887	19.5915
rs6517655	C	G	C	G	0.0757	-0.0140015	0.289	0.273	kidney cancer	0.7491	0.0437785	GCST90274785	21	42536246	0.0129	4.41e-09	21_42536246_C_G	14287	Delta and Notch-like epidermal growth factor-related receptor levels	0.00240484	0.00235499	33.7205	41.8887	34.436
rs7123587	A	C	A	C	-0.0552	-0.0472652	0.6266	0.6104	kidney cancer	0.3056	0.046135	GCST90274785	11	1681922	0.0124	8.52e-06	11_1681922_A_C	13222	Delta and Notch-like epidermal growth factor-related receptor levels	0.00149676	0.00142585	18.8766	41.8887	19.8169
rs74890918	A	G	A	G	0.2266	0.0628333	0.0157	0.01943	kidney cancer	0.7273	0.180183	GCST90274785	6	32953148	0.0502	6.36e-06	6_32953148_A_G	14287	Delta and Notch-like epidermal growth factor-related receptor levels	0.00142434	0.001587	22.7063	41.8887	20.3757
rs75685422	T	C	T	C	0.0879	0.0414472	0.1139	0.09305	kidney cancer	0.492	0.0603192	GCST90274785	14	95752666	0.0186	2.29e-06	14_95752666_T_C	14287	Delta and Notch-like epidermal growth factor-related receptor levels	0.00156097	0.0015596	22.3137	41.8887	22.3332
rs773112	T	C	T	C	0.0566	-0.089475	0.3128	0.32	kidney cancer	0.03211	0.0417515	GCST90274785	12	56375881	0.0125	5.95e-06	12_56375881_T_C	14287	Delta and Notch-like epidermal growth factor-related receptor levels	0.00143321	0.00137725	19.7011	41.8887	20.5028
rs7809355	A	C	A	C	-0.0734	0.050503	0.1553	0.1656	kidney cancer	0.3425	0.0532038	GCST90274785	7	25386238	0.0164	7.62e-06	7_25386238_A_C	14287	Delta and Notch-like epidermal growth factor-related receptor levels	0.00140028	0.0014135	20.2204	41.8887	20.0311
rs79707450	A	C	A	C	-0.1295	0.107585	0.0417	0.0501	kidney cancer	0.2262	0.0888983	GCST90274785	9	113309819	0.0287	6.42e-06	9_113309819_A_C	14733	Delta and Notch-like epidermal growth factor-related receptor levels	0.00138021	0.00134032	19.7707	41.8887	20.3599
rs9289590	T	C	T	C	-0.0652	0.106879	0.7033	0.6922	kidney cancer	0.3675	0.118601	GCST90274785	3	139639117	0.0142	4.4e-06	3_139639117_T_C	12404	Delta and Notch-like epidermal growth factor-related receptor levels	0.00169703	0.00177412	22.0418	41.8887	21.0823
rs9597690	A	G	A	G	-0.0531	-0.0430119	0.646	0.6421	kidney cancer	0.282	0.0399799	GCST90274785	13	58788135	0.0118	6.8e-06	13_58788135_A_G	14720	Delta and Notch-like epidermal growth factor-related receptor levels	0.00137398	0.0012896	19.0048	41.8887	20.25
rs9967959	T	G	T	G	0.0718	-0.0953102	0.1718	0.1769	kidney cancer	0.07976	0.0543983	GCST90274785	21	28101979	0.0152	2.32e-06	21_28101979_T_G	14731	Delta and Notch-like epidermal growth factor-related receptor levels	0.00151262	0.00146702	21.6395	41.8887	22.3132
rs112956934	T	C	T	C	0.1884	-0.0716693	0.0246	0.01738	kidney cancer	0.6305	0.148993	GCST90274786	12	96571503	0.0407	3.67e-06	12_96571503_T_C	14737	Protein S100-A12 levels	0.00145208	0.00170337	25.142	41.8887	21.4276
rs112988802	T	C	T	C	-0.1396	-0.117996	0.9492	0.94274	kidney cancer	0.1493	0.0818272	GCST90274786	14	59990514	0.0293	1.89e-06	14_59990514_T_C	12851	Protein S100-A12 levels	0.0017636	0.00187941	24.1941	41.8887	22.7005
rs113955692	T	C	T	C	0.1621	-0.128481	0.0315	0.03067	kidney cancer	0.6482	0.281594	GCST90274786	16	79653201	0.0366	9.47e-06	16_79653201_T_C	14295	Protein S100-A12 levels	0.00137052	0.00160327	22.9523	41.8887	19.6157
rs117923478	T	C	T	C	0.1795	-0.00813298	0.9721	0.9683	kidney cancer	0.9504	0.130746	GCST90274786	7	81211709	0.0395	5.51e-06	7_81211709_T_C	14295	Protein S100-A12 levels	0.00144273	0.00174773	25.024	41.8887	20.6507
rs13384799	T	C	T	C	-0.0622	-0.0621946	0.7266	0.6963	kidney cancer	0.1496	0.0431623	GCST90274786	2	125135589	0.0133	2.92e-06	2_125135589_T_C	14295	Protein S100-A12 levels	0.00152788	0.00153711	22.0037	41.8887	21.8714
rs140298956	A	C	A	C	-0.2114	-0.07622	0.0217	0.01431	kidney cancer	0.6025	0.146349	GCST90274786	5	39597187	0.0467	5.99e-06	5_39597187_A_C	14295	Protein S100-A12 levels	0.00143163	0.00189746	27.1719	41.8887	20.4916
rs147302029	A	G	A	G	0.1806	-0.0416217	0.0379	0.0317	kidney cancer	0.7167	0.1147	GCST90274786	16	4602209	0.0345	1.65e-07	16_4602209_A_G	13649	Protein S100-A12 levels	0.00200396	0.00237862	32.5384	41.8887	27.4029
rs150015576	A	C	A	C	0.194	-0.194826	0.0217	0.02556	kidney cancer	0.2474	0.168435	GCST90274786	3	174824333	0.0423	4.51e-06	3_174824333_A_C	14740	Protein S100-A12 levels	0.00142516	0.00159796	23.5884	41.8887	21.034
rs17325940	T	C	T	C	-0.0784	0.0751075	0.8611	0.8569	kidney cancer	0.2156	0.0606531	GCST90274786	3	60071129	0.0174	6.61e-06	3_60071129_T_C	14735	Protein S100-A12 levels	0.00137608	0.00147034	21.6944	41.8887	20.3018
rs1846881	A	G	A	G	-0.0737	-0.0675652	0.1925	0.183	kidney cancer	0.2399	0.0574907	GCST90274786	4	16409999	0.0165	7.94e-06	4_16409999_A_G	12212	Protein S100-A12 levels	0.00163133	0.00168864	20.6532	41.8887	19.9511
rs191808657	A	C	A	C	0.3059	0.164751	0.983	0.98262	kidney cancer	0.4346	0.210856	GCST90274786	7	75133433	0.0665	4.22e-06	7_75133433_A_C	12412	Protein S100-A12 levels	0.00170217	0.00312746	38.9335	41.8887	21.16
rs2056031	T	C	T	C	-0.0604	-0.0103463	0.613	0.6207	kidney cancer	0.7926	0.0393491	GCST90274786	4	12920594	0.0119	3.86e-07	4_12920594_T_C	14739	Protein S100-A12 levels	0.00174507	0.00173091	25.5527	41.8887	25.762
rs2425640	A	G	A	G	-0.0583	0.0144944	0.3511	0.3395	kidney cancer	0.7225	0.0408157	GCST90274786	20	43028037	0.0123	2.14e-06	20_43028037_A_G	14741	Protein S100-A12 levels	0.00152194	0.00154873	22.8621	41.8887	22.4661
rs2946493	T	C	T	C	0.0664	0.0448778	0.7902	0.8149	kidney cancer	0.3791	0.0510232	GCST90274786	8	12823671	0.0148	7.24e-06	8_12823671_T_C	14295	Protein S100-A12 levels	0.0014063	0.00146187	20.9251	41.8887	20.1286
rs3014874	A	G	A	G	-0.1726	0.0865388	0.2623	0.2883	kidney cancer	0.04957	0.0440702	GCST90274786	1	153337943	0.0137	2.15e-36	1_153337943_A_G	14294	Protein S100-A12 levels	0.0109838	0.0115289	166.694	41.8887	158.723
rs369132765	A	C	A	C	0.1301	-0.0199007	0.0558	0.05828	kidney cancer	0.8386	0.0977033	GCST90274786	9	27275548	0.0294	9.64e-06	9_27275548_A_C	12194	Protein S100-A12 levels	0.00160357	0.00178354	21.7838	41.8887	19.5821
rs3802266	A	G	A	G	0.0555	0.00299551	0.5633	0.5225	kidney cancer	0.9385	0.0388244	GCST90274786	8	123985708	0.0118	2.56e-06	8_123985708_A_G	14740	Protein S100-A12 levels	0.00149876	0.00151544	22.3685	41.8887	22.1219
rs55783131	T	C	T	C	0.2064	0.0106566	0.0239	0.02352	kidney cancer	0.9326	0.126003	GCST90274786	22	17406250	0.0425	1.19e-06	22_17406250_T_C	14728	Protein S100-A12 levels	0.00159905	0.00198766	29.3285	41.8887	23.5853
rs56268787	T	C	T	C	-0.0936	0.0286053	0.0955	0.1012	kidney cancer	0.659	0.0648213	GCST90274786	3	152573197	0.0203	4.01e-06	3_152573197_T_C	14737	Protein S100-A12 levels	0.00144073	0.00151354	22.3358	41.8887	21.2598
rs59538998	C	G	C	G	-0.1188	0.196137	0.0622	0.05726	kidney cancer	0.2694	0.177588	GCST90274786	1	245480237	0.0258	4.13e-06	1_245480237_C_G	14295	Protein S100-A12 levels	0.00148124	0.00164651	23.5723	41.8887	21.2028
rs61742155	A	C	A	C	0.0805	0.0306654	0.129	0.1196	kidney cancer	0.6054	0.0593542	GCST90274786	18	3896518	0.018	7.74e-06	18_3896518_A_C	14729	Protein S100-A12 levels	0.00135626	0.00145623	21.4772	41.8887	20.0008
rs61803119	T	G	T	G	0.1501	0.0898153	0.1069	0.09714	kidney cancer	0.1397	0.060813	GCST90274786	1	153390202	0.0194	1.02e-14	1_153390202_T_G	14295	Protein S100-A12 levels	0.0041708	0.00430199	61.754	41.8887	59.8629
rs78800546	A	G	A	G	-0.2529	0.0555127	0.0156	0.01125	kidney cancer	0.7359	0.164586	GCST90274786	11	31879143	0.0534	2.18e-06	11_31879143_A_G	14295	Protein S100-A12 levels	0.00156679	0.00196437	28.132	41.8887	22.4293
rs10777251	A	G	A	G	-0.0767	-0.0706448	0.1923	0.1933	kidney cancer	0.5664	0.123212	GCST90274787	12	91080475	0.0166	3.83e-06	12_91080475_A_G	12411	Fibroblast growth factor 19 levels	0.00171748	0.00182747	22.7186	41.8887	21.3489
rs111914842	T	C	T	C	-0.1634	-0.0351741	0.0368	0.03067	kidney cancer	0.7527	0.111635	GCST90274787	22	46332463	0.0362	6.37e-06	22_46332463_T_C	13667	Fibroblast growth factor 19 levels	0.00148878	0.00189277	25.9138	41.8887	20.3745
rs112126444	A	G	A	G	-0.0927	0.122394	0.1012	0.08691	kidney cancer	0.04818	0.0619471	GCST90274787	3	132162249	0.0199	3.19e-06	3_132162249_A_G	14735	Fibroblast growth factor 19 levels	0.0014707	0.00156327	23.0677	41.8887	21.6997
rs11244038	C	G	C	G	0.1199	0.0269602	0.0898	0.06544	kidney cancer	0.7539	0.0859971	GCST90274787	9	136095770	0.0247	1.21e-06	9_136095770_C_G	11786	Fibroblast growth factor 19 levels	0.00199565	0.00235007	27.7585	41.8887	23.5638
rs117398067	T	C	T	C	0.2583	0.435718	0.0178	0.01534	kidney cancer	0.1706	0.317978	GCST90274787	15	59188192	0.0564	4.65e-06	15_59188192_T_C	14744	Fibroblast growth factor 19 levels	0.00142075	0.00233291	34.4722	41.8887	20.9745
rs117438391	T	C	T	C	-0.2079	0.0476159	0.0225	0.02454	kidney cancer	0.7216	0.133632	GCST90274787	14	38084604	0.0466	8.14e-06	14_38084604_T_C	13868	Fibroblast growth factor 19 levels	0.00143338	0.00190125	26.4129	41.8887	19.9039
rs12110436	T	C	T	C	-0.136	0.0568879	0.0418	0.0501	kidney cancer	0.5448	0.0939409	GCST90274787	6	168606201	0.0297	4.67e-06	6_168606201_T_C	14743	Fibroblast growth factor 19 levels	0.00142043	0.00148163	21.8731	41.8887	20.9684
rs12342925	A	T	A	T	-0.1352	-0.0386436	0.0429	0.05112	kidney cancer	0.696	0.0989022	GCST90274787	9	82082569	0.0299	6.13e-06	9_82082569_A_T	14744	Fibroblast growth factor 19 levels	0.00138501	0.00150106	22.1619	41.8887	20.4461
rs12407505	A	G	A	G	-0.1614	-0.103473	0.9664	0.97239	kidney cancer	0.3379	0.107973	GCST90274787	1	85295202	0.0352	4.53e-06	1_85295202_A_G	14735	Fibroblast growth factor 19 levels	0.00142499	0.00169174	24.9666	41.8887	21.0243
rs12520287	T	C	T	C	-0.1014	0.0574195	0.9175	0.90082	kidney cancer	0.4423	0.0747343	GCST90274787	5	54847098	0.0221	4.47e-06	5_54847098_T_C	14296	Fibroblast growth factor 19 levels	0.00147061	0.00155656	22.2842	41.8887	21.0519
rs13103023	A	G	A	G	0.0837	0.0570996	0.3415	0.32	kidney cancer	0.1634	0.040969	GCST90274787	4	39457617	0.0124	1.48e-11	4_39457617_A_G	14296	Fibroblast growth factor 19 levels	0.0031774	0.00315085	45.1806	41.8887	45.5625
rs141140791	T	C	T	C	-0.1293	-0.0209784	0.0497	0.04806	kidney cancer	0.8188	0.0915733	GCST90274787	10	61186227	0.0286	6.16e-06	10_61186227_T_C	14733	Fibroblast growth factor 19 levels	0.00138558	0.00157923	23.3004	41.8887	20.4393
rs142067135	A	G	A	G	-0.2295	-0.0196065	0.0198	0.02045	kidney cancer	0.8891	0.140606	GCST90274787	12	76644195	0.0492	3.09e-06	12_76644195_A_G	13809	Fibroblast growth factor 19 levels	0.00157345	0.00204444	28.2855	41.8887	21.7588
rs142585344	A	G	A	G	0.2133	0.075586	0.0218	0.03272	kidney cancer	0.5723	0.133859	GCST90274787	2	32584586	0.0482	9.63e-06	2_32584586_A_G	13809	Fibroblast growth factor 19 levels	0.00141636	0.00194042	26.8435	41.8887	19.5834
rs145274424	T	C	T	C	0.1992	0.323604	0.9777	0.9816	kidney cancer	0.04816	0.163771	GCST90274787	7	17445553	0.0421	2.23e-06	7_17445553_T_C	14735	Fibroblast growth factor 19 levels	0.00151727	0.00173029	25.5366	41.8887	22.388
rs145434248	A	G	A	G	-0.1442	-0.273685	0.0425	0.02045	kidney cancer	0.296	0.261887	GCST90274787	14	64892172	0.0323	8.03e-06	14_64892172_A_G	14296	Fibroblast growth factor 19 levels	0.00139241	0.00169234	24.2313	41.8887	19.9308
rs1671812	T	C	T	C	0.0621	-0.0628333	0.6316	0.6288	kidney cancer	0.4457	0.0823932	GCST90274787	11	114495920	0.0132	2.54e-06	11_114495920_T_C	12412	Fibroblast growth factor 19 levels	0.00178029	0.00179463	22.3114	41.8887	22.1327
rs17326790	T	C	T	C	0.2161	-0.0782565	0.0209	0.02045	kidney cancer	0.6277	0.161365	GCST90274787	13	85357827	0.0471	4.47e-06	13_85357827_T_C	14741	Fibroblast growth factor 19 levels	0.0014262	0.00191123	28.2236	41.8887	21.0508
rs191522330	T	C	T	C	0.2325	0.00219758	0.9812	0.98364	kidney cancer	0.9883	0.149859	GCST90274787	11	5610048	0.0488	1.89e-06	11_5610048_T_C	14738	Fibroblast growth factor 19 levels	0.00153801	0.0019943	29.4468	41.8887	22.699
rs2306969	A	G	A	G	0.0674	-0.175545	0.2338	0.2342	kidney cancer	0.06976	0.0968006	GCST90274787	19	5851801	0.0141	1.75e-06	19_5851801_A_G	14739	Fibroblast growth factor 19 levels	0.0015481	0.00162756	24.0244	41.8887	22.8498
rs2906655	T	C	T	C	-0.0623	-0.0112366	0.2503	0.2372	kidney cancer	0.8055	0.0456337	GCST90274787	7	101569302	0.0135	3.93e-06	7_101569302_T_C	14743	Fibroblast growth factor 19 levels	0.00144263	0.00145665	21.5038	41.8887	21.2965
rs35836706	A	G	A	G	0.2151	-0.165853	0.0203	0.02249	kidney cancer	0.2724	0.151112	GCST90274787	9	84435749	0.0456	2.39e-06	9_84435749_A_G	14734	Fibroblast growth factor 19 levels	0.00150811	0.00184035	27.162	41.8887	22.2511
rs3846346	T	G	T	G	0.1372	-0.0205866	0.0459	0.0501	kidney cancer	0.834	0.0982308	GCST90274787	4	27730465	0.0305	6.85e-06	4_27730465_T_G	14729	Fibroblast growth factor 19 levels	0.00137214	0.00164871	24.3207	41.8887	20.2352
rs4483036	A	C	A	C	-0.0675	-0.00160128	0.2516	0.2198	kidney cancer	0.9754	0.0519283	GCST90274787	6	8777463	0.0148	5.1e-06	6_8777463_A_C	12412	Fibroblast growth factor 19 levels	0.00167334	0.00171586	21.3304	41.8887	20.801
rs516246	T	C	T	C	-0.1661	0.0232686	0.445	0.4376	kidney cancer	0.5505	0.0389752	GCST90274787	19	49206172	0.0118	5.31e-45	19_49206172_T_C	14744	Fibroblast growth factor 19 levels	0.0132624	0.0136277	203.675	41.8887	198.141
rs574352299	A	G	A	G	0.2371	0.0916672	0.9755	0.96524	kidney cancer	0.55	0.153351	GCST90274787	3	74674996	0.0482	8.69e-07	3_74674996_A_G	10894	Fibroblast growth factor 19 levels	0.00221665	0.00268712	29.3469	41.8887	24.1974
rs7005978	A	G	A	G	-0.1055	0.0542041	0.3458	0.3661	kidney cancer	0.1822	0.0406324	GCST90274787	8	59382715	0.0123	9.72e-18	8_59382715_A_G	14744	Fibroblast growth factor 19 levels	0.00496565	0.00503582	74.6138	41.8887	73.569
rs73775566	A	T	A	T	0.107	-0.0697126	0.0677	0.05726	kidney cancer	0.4174	0.0859652	GCST90274787	6	139960701	0.024	8.26e-06	6_139960701_A_T	14737	Fibroblast growth factor 19 levels	0.00134713	0.00144525	21.3265	41.8887	19.8767
rs75715636	A	G	A	G	0.0838	0.0531898	0.1237	0.1063	kidney cancer	0.3801	0.0606005	GCST90274787	3	7913293	0.0187	7.42e-06	3_7913293_A_G	14296	Fibroblast growth factor 19 levels	0.00140295	0.00152244	21.795	41.8887	20.0819
rs76708593	T	C	T	C	0.1024	-0.0557241	0.9158	0.92843	kidney cancer	0.4348	0.0713494	GCST90274787	12	108147245	0.0222	3.98e-06	12_108147245_T_C	14296	Fibroblast growth factor 19 levels	0.00148626	0.00161712	23.1526	41.8887	21.2762
rs79110990	A	G	A	G	0.073	-0.0476467	0.1762	0.1718	kidney cancer	0.377	0.0539333	GCST90274787	9	18148302	0.0156	2.88e-06	9_18148302_A_G	14295	Fibroblast growth factor 19 levels	0.00152971	0.00154705	22.1462	41.8887	21.8976
rs79439490	T	C	T	C	-0.3528	0.899267	0.984	0.98773	kidney cancer	0.02379	0.397817	GCST90274787	1	193891487	0.079	7.98e-06	1_193891487_T_C	8334	Fibroblast growth factor 19 levels	0.0023879	0.00391924	32.7836	41.8887	19.9436
rs80023023	A	G	A	G	-0.2706	0.117658	0.0119	0.01022	kidney cancer	0.7522	0.372642	GCST90274787	12	20656675	0.0607	8.27e-06	12_20656675_A_G	12935	Fibroblast growth factor 19 levels	0.00153431	0.001722	22.3091	41.8887	19.8737
rs834971	A	G	A	G	-0.0614	0.0443699	0.3002	0.2986	kidney cancer	0.2965	0.0425012	GCST90274787	1	100098055	0.0128	1.61e-06	1_100098055_A_G	14728	Fibroblast growth factor 19 levels	0.0015601	0.00158399	23.3628	41.8887	23.01
rs10495032	T	G	T	G	-0.1557	0.0805595	0.0383	0.0593	kidney cancer	0.4131	0.0984293	GCST90274788	1	216837226	0.0318	9.77e-07	1_216837226_T_G	14720	Fibroblast growth factor 21 levels	0.00162618	0.00178585	26.3312	41.8887	23.973
rs12290350	T	C	T	C	-0.0689	-0.000499875	0.2168	0.2403	kidney cancer	0.9914	0.0463761	GCST90274788	11	76480255	0.0145	2.02e-06	11_76480255_T_C	14295	Fibroblast growth factor 21 levels	0.00157723	0.00161213	23.0794	41.8887	22.5789
rs12532101	T	C	T	C	0.0659	-0.00538547	0.203	0.2025	kidney cancer	0.9231	0.0557909	GCST90274788	7	1194526	0.0149	9.74e-06	7_1194526_T_C	14295	Fibroblast growth factor 21 levels	0.00136672	0.00140526	20.1136	41.8887	19.5613
rs1260326	T	C	T	C	0.1323	-0.0763412	0.3977	0.4141	kidney cancer	0.05591	0.0399329	GCST90274788	2	27730940	0.0119	1.03e-28	2_27730940_T_C	14730	Fibroblast growth factor 21 levels	0.00832247	0.00838529	124.543	41.8887	123.602
rs12691469	T	C	T	C	-0.0541	-0.0386369	0.6149	0.6135	kidney cancer	0.3349	0.0400677	GCST90274788	1	188409389	0.0122	9.23e-06	1_188409389_T_C	14295	Fibroblast growth factor 21 levels	0.0013739	0.00138612	19.8394	41.8887	19.6641
rs13062487	A	G	A	G	0.0571	0.0238142	0.3387	0.32	kidney cancer	0.5627	0.0411415	GCST90274788	3	71944243	0.0126	5.85e-06	3_71944243_A_G	14295	Fibroblast growth factor 21 levels	0.00143478	0.00146055	20.9062	41.8887	20.5367
rs13229619	A	G	A	G	-0.1609	0.0495054	0.1297	0.1186	kidney cancer	0.389	0.0574687	GCST90274788	7	73030175	0.0176	6.13e-20	7_73030175_A_G	14743	Fibroblast growth factor 21 levels	0.00563773	0.00584455	86.661	41.8887	83.577
rs142603673	T	C	T	C	-0.2352	-0.239883	0.0232	0.02556	kidney cancer	0.1103	0.150223	GCST90274788	21	33860969	0.0455	2.35e-07	21_33860969_T_C	14252	Fibroblast growth factor 21 levels	0.00187164	0.00250725	35.8182	41.8887	26.7209
rs145127946	A	G	A	G	-0.1747	-0.0332413	0.037	0.02965	kidney cancer	0.7673	0.112337	GCST90274788	1	203746507	0.036	1.22e-06	1_203746507_A_G	14295	Fibroblast growth factor 21 levels	0.00164491	0.00217492	31.1539	41.8887	23.5495
rs149561599	T	G	T	G	0.1978	0.0957646	0.9786	0.97955	kidney cancer	0.5036	0.143181	GCST90274788	22	20883740	0.0444	8.39e-06	22_20883740_T_G	13869	Fibroblast growth factor 21 levels	0.00142917	0.00163871	22.7613	41.8887	19.8466
rs17284047	T	C	T	C	-0.2149	-0.0673157	0.9794	0.98773	kidney cancer	0.642	0.144795	GCST90274788	3	100519020	0.0479	7.24e-06	3_100519020_T_C	14743	Fibroblast growth factor 21 levels	0.00136359	0.0018635	27.5212	41.8887	20.1281
rs183222959	A	G	A	G	0.1419	0.319181	0.8998		kidney cancer	0.5669	0.557401	GCST90274788	2	40402664	0.0313	5.8e-06	2_40402664_A_G	11538	Fibroblast growth factor 21 levels	0.00177848	0.00363085	42.0381	41.8887	20.553
rs2429473	A	C	A	C	-0.0812	0.0163327	0.795	0.8047	kidney cancer	0.7423	0.0496722	GCST90274788	12	47198899	0.0147	3.32e-08	12_47198899_A_C	14295	Fibroblast growth factor 21 levels	0.00213024	0.00214913	30.7837	41.8887	30.5125
rs35852631	C	G	C	G	-0.0608	-0.0573251	0.2555	0.2658	kidney cancer	0.1992	0.0446515	GCST90274788	5	107955452	0.0135	6.68e-06	5_107955452_C_G	14730	Fibroblast growth factor 21 levels	0.0013753	0.00140635	20.7419	41.8887	20.2833
rs374354803	A	G	A	G	0.1208	0.00538547	0.9316	0.92945	kidney cancer	0.951	0.0876384	GCST90274788	9	132338678	0.0266	5.59e-06	9_132338678_A_G	12198	Fibroblast growth factor 21 levels	0.00168818	0.00185973	22.7235	41.8887	20.6239
rs4700382	T	C	T	C	-0.063	0.076498	0.2698	0.2587	kidney cancer	0.389	0.0888032	GCST90274788	5	55882435	0.0136	3.62e-06	5_55882435_T_C	14295	Fibroblast growth factor 21 levels	0.00149909	0.00156385	22.3871	41.8887	21.4587
rs60277384	T	C	T	C	-0.0881	0.0341115	0.8922	0.8967	kidney cancer	0.6043	0.0658235	GCST90274788	5	84356011	0.019	3.54e-06	5_84356011_T_C	14742	Fibroblast growth factor 21 levels	0.00145651	0.00149301	22.0399	41.8887	21.5003
rs7012637	A	G	A	G	-0.0605	0.0178585	0.4812	0.4714	kidney cancer	0.6488	0.0392124	GCST90274788	8	9173209	0.012	4.61e-07	8_9173209_A_G	14295	Fibroblast growth factor 21 levels	0.00177522	0.00182754	26.1688	41.8887	25.4184
rs72965996	A	G	A	G	-0.2215	0.0541394	0.031	0.01227	kidney cancer	0.7307	0.157293	GCST90274788	18	72826607	0.0444	6.08e-07	18_72826607_A_G	13808	Fibroblast growth factor 21 levels	0.00179942	0.00294756	40.8143	41.8887	24.8875
rs7442192	A	G	A	G	0.0619	-0.0412379	0.7357	0.7362	kidney cancer	0.3611	0.0451541	GCST90274788	4	45023201	0.0138	7.27e-06	4_45023201_A_G	14295	Fibroblast growth factor 21 levels	0.00140569	0.00149008	21.3295	41.8887	20.1198
rs7610704	T	C	T	C	-0.0568	0.0777015	0.4644	0.4969	kidney cancer	0.04606	0.0389512	GCST90274788	3	11689679	0.012	2.21e-06	3_11689679_T_C	14295	Fibroblast growth factor 21 levels	0.00156506	0.00160494	22.9763	41.8887	22.4044
rs7834283	A	G	A	G	-0.3467	-0.191777	0.01	0.009202	kidney cancer	0.6271	0.394754	GCST90274788	8	135756557	0.0784	9.77e-06	8_135756557_A_G	9555	Fibroblast growth factor 21 levels	0.0020429	0.00237998	22.7902	41.8887	19.5558
rs79789860	T	C	T	C	-0.2003	-0.189876	0.0209	0.02863	kidney cancer	0.2358	0.160159	GCST90274788	7	114309511	0.0448	7.79e-06	7_114309511_T_C	14729	Fibroblast growth factor 21 levels	0.00135551	0.00164197	24.2211	41.8887	19.9897
rs8191009	A	G	A	G	0.0678	0.0669949	0.1998	0.1922	kidney cancer	0.1632	0.048046	GCST90274788	8	30545827	0.0151	7.12e-06	8_30545827_A_G	14295	Fibroblast growth factor 21 levels	0.00140854	0.00146988	21.04	41.8887	20.1607
rs10737349	A	G	A	G	0.0746	0.0470744	0.1462	0.1483	kidney cancer	0.3807	0.0537007	GCST90274789	1	180583036	0.0167	7.93e-06	1_180583036_A_G	14286	Fibroblast growth factor 23 levels	0.00139505	0.00138935	19.8731	41.8887	19.9547
rs11150539	T	C	T	C	-0.056	-0.00642057	0.4938	0.4806	kidney cancer	0.9379	0.0824105	GCST90274789	16	83137317	0.0119	2.53e-06	16_83137317_T_C	14287	Fibroblast growth factor 23 levels	0.00154785	0.00156776	22.4306	41.8887	22.1453
rs117963256	A	T	A	T	-0.291	0.161461	0.0117	0.01125	kidney cancer	0.3687	0.179618	GCST90274789	8	19386357	0.0653	8.34e-06	8_19386357_A_T	12304	Fibroblast growth factor 23 levels	0.0016117	0.00195835	24.1389	41.8887	19.8591
rs118177380	A	G	A	G	0.2362	0.103363	0.0187	0.0184	kidney cancer	0.506	0.155414	GCST90274789	11	106531034	0.0507	3.18e-06	11_106531034_A_G	14287	Fibroblast growth factor 23 levels	0.00151706	0.00204754	29.3092	41.8887	21.7042
rs11930290	A	T	A	T	-0.1845	0.189297	0.9748	0.97546	kidney cancer	0.1748	0.139503	GCST90274789	4	124325226	0.0389	2.11e-06	4_124325226_A_T	12848	Fibroblast growth factor 23 levels	0.0017481	0.00167239	21.5196	41.8887	22.4954
rs12195292	A	G	A	G	-0.0768	0.0606246	0.8634	0.8722	kidney cancer	0.2915	0.057473	GCST90274789	6	81343345	0.0166	3.72e-06	6_81343345_A_G	14710	Fibroblast growth factor 23 levels	0.00145319	0.00139128	20.4915	41.8887	21.4046
rs138865481	A	G	A	G	-0.2386	-0.176555	0.0154	0.01227	kidney cancer	0.3207	0.177796	GCST90274789	1	205812500	0.0534	7.89e-06	1_205812500_A_G	13800	Fibroblast growth factor 23 levels	0.00144482	0.00172644	23.8626	41.8887	19.9645
rs145628723	A	G	A	G	0.1957	0.212575	0.022	0.01636	kidney cancer	0.1147	0.134761	GCST90274789	13	103962376	0.0437	7.53e-06	13_103962376_A_G	14238	Fibroblast growth factor 23 levels	0.00140676	0.00164806	23.5005	41.8887	20.0548
rs181409232	A	C	A	C	-0.2224	-0.137499	0.0191	0.01329	kidney cancer	0.4357	0.176399	GCST90274789	6	31175118	0.0479	3.43e-06	6_31175118_A_C	12846	Fibroblast growth factor 23 levels	0.0016756	0.00185335	23.8486	41.8887	21.5575
rs2825747	A	G	A	G	0.0693	-0.0759096	0.8386	0.819	kidney cancer	0.1395	0.0513716	GCST90274789	21	21059864	0.0153	5.91e-06	21_21059864_A_G	14735	Fibroblast growth factor 23 levels	0.00139055	0.00130003	19.1783	41.8887	20.5156
rs33921462	A	G	A	G	-0.0653	0.0365603	0.2766	0.2853	kidney cancer	0.4679	0.0503654	GCST90274789	5	176814656	0.0135	1.32e-06	5_176814656_A_G	14287	Fibroblast growth factor 23 levels	0.00163519	0.00170642	24.4179	41.8887	23.3969
rs34551523	A	G	A	G	0.1704	-0.0788112	0.0295	0.03374	kidney cancer	0.5144	0.120876	GCST90274789	5	146629145	0.0348	9.75e-07	5_146629145_A_G	14730	Fibroblast growth factor 23 levels	0.00162529	0.0016626	24.5275	41.8887	23.9762
rs35590112	T	C	T	C	0.0803	0.082621	0.1851	0.1708	kidney cancer	0.1022	0.050555	GCST90274789	22	22238107	0.0166	1.32e-06	22_22238107_T_C	12386	Fibroblast growth factor 23 levels	0.00188597	0.00194523	24.1367	41.8887	23.3999
rs368215473	A	G	A	G	0.1228	-0.00915794	0.0941	0.09202	kidney cancer	0.9047	0.0764906	GCST90274789	22	18002038	0.0257	1.77e-06	22_18002038_A_G	9397	Fibroblast growth factor 23 levels	0.00242426	0.00257097	24.2165	41.8887	22.8313
rs3811621	C	G	C	G	0.1163	-0.0484552	0.2897	0.2669	kidney cancer	0.2773	0.0446014	GCST90274789	2	190446541	0.0131	6.82e-19	2_190446541_C_G	14286	Fibroblast growth factor 23 levels	0.00548753	0.00556647	79.9565	41.8887	78.8164
rs4730018	A	C	A	C	0.0936	-0.0389487	0.9039	0.8978	kidney cancer	0.562	0.0671677	GCST90274789	7	104141309	0.0206	5.53e-06	7_104141309_A_C	14287	Fibroblast growth factor 23 levels	0.00144314	0.00152204	21.7755	41.8887	20.6451
rs4958089	T	C	T	C	0.0513	-0.00020002	0.4217	0.4693	kidney cancer	0.9967	0.0483613	GCST90274789	5	132484429	0.0115	8.16e-06	5_132484429_T_C	14735	Fibroblast growth factor 23 levels	0.00134884	0.00128358	18.9352	41.8887	19.8994
rs57479285	T	C	T	C	0.4343	-0.600593	0.0113	0.01227	kidney cancer	0.2601	0.533313	GCST90274789	11	111082782	0.0981	9.55e-06	11_111082782_T_C	7424	Fibroblast growth factor 23 levels	0.00263376	0.00421456	31.4129	41.8887	19.5993
rs6127099	A	T	A	T	0.0907	0.10075	0.706	0.6646	kidney cancer	0.2719	0.0916994	GCST90274789	20	52731402	0.0134	1.3e-11	20_52731402_A_T	14287	Fibroblast growth factor 23 levels	0.00319694	0.00341505	48.9511	41.8887	45.8147
rs62307586	T	G	T	G	-0.0552	-0.0212236	0.2859	0.2771	kidney cancer	0.6245	0.0433593	GCST90274789	4	61224008	0.0124	8.52e-06	4_61224008_T_G	14735	Fibroblast growth factor 23 levels	0.00134326	0.00124417	18.3533	41.8887	19.8169
rs671205	T	C	T	C	0.0708	0.00886063	0.7502	0.7761	kidney cancer	0.8474	0.0460443	GCST90274789	1	146522722	0.0136	1.93e-07	1_146522722_T_C	14287	Fibroblast growth factor 23 levels	0.00189359	0.00187874	26.8883	41.8887	27.1012
rs6753743	T	G	T	G	0.0941	-0.0738079	0.8733	0.8916	kidney cancer	0.2583	0.0652926	GCST90274789	2	121962947	0.0185	3.65e-07	2_121962947_T_G	14287	Fibroblast growth factor 23 levels	0.00180788	0.00195952	28.0467	41.8887	25.8723
rs72720704	T	C	T	C	0.0725	-0.0512933	0.8402	0.8753	kidney cancer	0.333	0.0529841	GCST90274789	1	176974037	0.0161	6.7e-06	1_176974037_T_C	14287	Fibroblast growth factor 23 levels	0.00141752	0.00141145	20.1911	41.8887	20.278
rs794007	T	C	T	C	0.0685	0.0595888	0.2406	0.2382	kidney cancer	0.2414	0.0508656	GCST90274789	4	40142535	0.0144	1.97e-06	4_40142535_T_C	12844	Fibroblast growth factor 23 levels	0.00175897	0.00171466	22.0575	41.8887	22.6285
rs7955866	A	G	A	G	-0.0959	-0.0870947	0.1141	0.1176	kidney cancer	0.1643	0.0626241	GCST90274789	12	4479549	0.0178	7.14e-08	12_4479549_A_G	14719	Fibroblast growth factor 23 levels	0.00196844	0.00185925	27.4135	41.8887	29.0267
rs9859317	A	G	A	G	-0.0549	-0.0041912	0.3489	0.3252	kidney cancer	0.9179	0.04066	GCST90274789	3	64683150	0.0124	9.54e-06	3_64683150_A_G	14287	Fibroblast growth factor 23 levels	0.00137033	0.00136938	19.5884	41.8887	19.602
rs9950230	C	G	C	G	-0.0559	-0.0518197	0.7034	0.7014	kidney cancer	0.2268	0.0428743	GCST90274789	18	56254394	0.0123	5.5e-06	18_56254394_C_G	14726	Fibroblast growth factor 23 levels	0.00140081	0.00130385	19.2229	41.8887	20.6544
rs305897	T	C	T	C	0.1185	-0.0532953	0.0828	0.07771	kidney cancer	0.4604	0.0721974	GCST90274790	6	39710570	0.0249	1.95e-06	6_39710570_T_C	11341	Fibroblast growth factor 5 levels	0.00199341	0.00213285	24.2361	41.8887	22.6484
rs36034102	T	G	T	G	0.497	-0.0037928	0.273	0.2444	kidney cancer	0.9312	0.0439311	GCST90274790	4	81202048	0.0143	1.15e-264	4_81202048_T_G	11341	Fibroblast growth factor 5 levels	0.0962727	0.0980482	1232.63	41.8887	1207.93
rs4326078	A	C	A	C	-0.0728	-0.0676586	0.2193	0.2403	kidney cancer	0.1515	0.0471734	GCST90274790	4	70058335	0.015	1.21e-06	4_70058335_A_C	11789	Fibroblast growth factor 5 levels	0.00199439	0.00181474	21.4293	41.8887	23.5548
rs56391958	A	G	A	G	-0.1197	0.128288	0.0816	0.07975	kidney cancer	0.06285	0.0689627	GCST90274790	16	62005709	0.0249	1.53e-06	16_62005709_A_G	11341	Fibroblast growth factor 5 levels	0.0020339	0.00214753	24.4033	41.8887	23.1094
rs73212350	A	G	A	G	0.0826	0.0536355	0.8353	0.8292	kidney cancer	0.3215	0.0541019	GCST90274790	13	62081113	0.0169	1.02e-06	13_62081113_A_G	11787	Fibroblast growth factor 5 levels	0.00202292	0.00187727	22.1652	41.8887	23.8884
rs75936934	A	G	A	G	-0.3522	-0.00677698	0.0174	0.01329	kidney cancer	0.9655	0.156683	GCST90274790	4	81544248	0.0524	1.8e-11	4_81544248_A_G	11302	Fibroblast growth factor 5 levels	0.00398203	0.00424165	48.1348	41.8887	45.1769
rs10164255	T	G	T	G	0.0556	-0.0651787	0.408	0.3712	kidney cancer	0.1537	0.0456887	GCST90274791	18	70532840	0.0121	4.33e-06	18_70532840_T_G	14729	Fms-related tyrosine kinase 3 ligand levels	0.00143167	0.00149335	22.0254	41.8887	21.1144
rs11212636	A	G	A	G	-0.0772	0.120813	0.4171	0.453	kidney cancer	0.001969	0.0390364	GCST90274791	11	108311965	0.0117	4.16e-11	11_108311965_A_G	14723	Fms-related tyrosine kinase 3 ligand levels	0.00294878	0.002898	42.7855	41.8887	43.5374
rs113877570	A	G	A	G	-0.1207	0.0293258	0.0513	0.04703	kidney cancer	0.7293	0.0847428	GCST90274791	2	36270546	0.0266	5.69e-06	2_36270546_A_G	14729	Fms-related tyrosine kinase 3 ligand levels	0.00139614	0.00141805	20.9132	41.8887	20.5898
rs11961049	A	G	A	G	0.1031	0.0512933	0.0686	0.06442	kidney cancer	0.5127	0.0783535	GCST90274791	6	155496339	0.0232	8.83e-06	6_155496339_A_G	14724	Fms-related tyrosine kinase 3 ligand levels	0.00133965	0.00135834	20.0246	41.8887	19.7488
rs12338549	T	C	T	C	-0.0851	-0.0369104	0.1096	0.1145	kidney cancer	0.5743	0.0657084	GCST90274791	9	94348687	0.0186	4.76e-06	9_94348687_T_C	14719	Fms-related tyrosine kinase 3 ligand levels	0.00142035	0.00141346	20.8314	41.8887	20.9331
rs12609918	A	G	A	G	-0.1863	-0.148152	0.9451	0.94479	kidney cancer	0.4979	0.218579	GCST90274791	19	56755467	0.0412	6.13e-06	19_56755467_A_G	9453	Fms-related tyrosine kinase 3 ligand levels	0.00215881	0.00360169	34.1626	41.8887	20.4471
rs1379304	T	C	T	C	0.0603	0.140988	0.3741	0.3824	kidney cancer	0.08517	0.0819008	GCST90274791	5	6289394	0.0127	2.05e-06	5_6289394_T_C	14286	Fms-related tyrosine kinase 3 ligand levels	0.00157577	0.00170277	24.3639	41.8887	22.5438
rs141117375	T	C	T	C	-0.1519	0.113617	0.0364	0.0317	kidney cancer	0.2561	0.100045	GCST90274791	11	62294309	0.0331	4.45e-06	11_62294309_T_C	14286	Fms-related tyrosine kinase 3 ligand levels	0.00147221	0.00161862	23.1578	41.8887	21.0601
rs144317085	A	T	A	T	0.2206	0.0660686	0.9647	0.96421	kidney cancer	0.5643	0.11461	GCST90274791	4	105806108	0.0324	9.85e-12	4_105806108_A_T	14722	Fms-related tyrosine kinase 3 ligand levels	0.00313941	0.00331442	48.9506	41.8887	46.3576
rs17272847	A	G	A	G	0.1179	0.0521358	0.0907	0.1022	kidney cancer	0.4663	0.0715647	GCST90274791	19	49979398	0.022	8.36e-08	19_49979398_A_G	13222	Fms-related tyrosine kinase 3 ligand levels	0.00216775	0.00229283	30.3809	41.8887	28.7199
rs184038883	A	C	A	C	-0.2276	-0.0766832	0.0242	0.01022	kidney cancer	0.6668	0.178108	GCST90274791	4	185989605	0.0504	6.31e-06	4_185989605_A_C	12790	Fms-related tyrosine kinase 3 ligand levels	0.00159217	0.00244653	31.363	41.8887	20.3931
rs185979634	T	C	T	C	0.1483	0.0746435	0.9513	0.9407	kidney cancer	0.4208	0.092721	GCST90274791	10	101403323	0.0306	1.26e-06	10_101403323_T_C	12847	Fms-related tyrosine kinase 3 ligand levels	0.00182521	0.00203779	26.2288	41.8887	23.4876
rs1866051	T	C	T	C	-0.0746	-0.00180162	0.4771	0.501	kidney cancer	0.9622	0.0380145	GCST90274791	2	65602149	0.0115	8.76e-11	2_65602149_T_C	14732	Fms-related tyrosine kinase 3 ligand levels	0.00284866	0.00277674	41.0153	41.8887	42.0806
rs186975	C	G	C	G	0.0554	-0.0427721	0.382	0.3712	kidney cancer	0.2848	0.0399889	GCST90274791	2	8442736	0.0119	3.23e-06	2_8442736_C_G	14703	Fms-related tyrosine kinase 3 ligand levels	0.00147211	0.00144911	21.3343	41.8887	21.6733
rs192857133	T	C	T	C	0.1812	0.0788268	0.026	0.02658	kidney cancer	0.5156	0.121245	GCST90274791	9	243950	0.0386	2.68e-06	9_243950_T_C	14727	Fms-related tyrosine kinase 3 ligand levels	0.0014943	0.00166295	24.5277	41.8887	22.0365
rs218265	T	C	T	C	0.0833	-0.0174514	0.8361	0.8538	kidney cancer	0.7463	0.0539419	GCST90274791	4	55408999	0.016	1.93e-07	4_55408999_T_C	14731	Fms-related tyrosine kinase 3 ligand levels	0.00183687	0.00190177	28.0645	41.8887	27.105
rs2325555	A	G	A	G	-0.0653	-0.016536	0.8002	0.8067	kidney cancer	0.7322	0.0483225	GCST90274791	13	74312013	0.0146	7.73e-06	13_74312013_A_G	14720	Fms-related tyrosine kinase 3 ligand levels	0.00135732	0.00136349	20.0952	41.8887	20.0042
rs28533776	A	G	A	G	-0.0749	0.00210221	0.1924	0.1769	kidney cancer	0.9654	0.0484622	GCST90274791	7	3914756	0.0147	3.48e-07	7_3914756_A_G	14731	Fms-related tyrosine kinase 3 ligand levels	0.00175951	0.00174339	25.7233	41.8887	25.9615
rs35340580	A	G	A	G	-0.1383	-0.146867	0.0449	0.03374	kidney cancer	0.151	0.102275	GCST90274791	16	1526820	0.0303	5.01e-06	16_1526820_A_G	13653	Fms-related tyrosine kinase 3 ligand levels	0.00152381	0.00164047	22.4309	41.8887	20.8333
rs35977476	C	G	C	G	0.1102	-0.00458945	0.0668	0.0726	kidney cancer	0.9514	0.0753001	GCST90274791	9	9191493	0.0244	6.29e-06	9_9191493_C_G	14725	Fms-related tyrosine kinase 3 ligand levels	0.00138352	0.00151406	22.3254	41.8887	20.3978
rs374309	A	G	A	G	0.0786	-0.00944446	0.8629	0.8978	kidney cancer	0.8707	0.0580236	GCST90274791	19	22332298	0.0174	6.27e-06	19_22332298_A_G	14286	Fms-related tyrosine kinase 3 ligand levels	0.00142652	0.00146175	20.9102	41.8887	20.4055
rs4919613	A	G	A	G	-0.0662	-0.0338671	0.1973	0.2096	kidney cancer	0.502	0.0504465	GCST90274791	10	103905779	0.0148	7.71e-06	10_103905779_A_G	14286	Fms-related tyrosine kinase 3 ligand levels	0.00139873	0.00138812	19.8554	41.8887	20.0075
rs55633025	A	G	A	G	0.0725	0.0480354	0.4738	0.4755	kidney cancer	0.2812	0.0445752	GCST90274791	1	159890969	0.0129	1.91e-08	1_159890969_A_G	12404	Fms-related tyrosine kinase 3 ligand levels	0.00254039	0.00262091	32.5899	41.8887	31.5861
rs55646869	A	G	A	G	0.0529	-0.0259601	0.4437	0.4182	kidney cancer	0.513	0.0396838	GCST90274791	9	129753010	0.0116	5.11e-06	9_129753010_A_G	14703	Fms-related tyrosine kinase 3 ligand levels	0.00141265	0.00138146	20.337	41.8887	20.7967
rs57191857	A	G	A	G	-0.1429	-0.0151136	0.9571	0.96217	kidney cancer	0.8771	0.0977302	GCST90274791	9	10640144	0.0299	1.76e-06	9_10640144_A_G	14734	Fms-related tyrosine kinase 3 ligand levels	0.00154806	0.00167691	24.7457	41.8887	22.8414
rs575588389	A	G	A	G	-0.0904	-0.0143018	0.8501	0.8344	kidney cancer	0.8181	0.0621845	GCST90274791	4	20519864	0.0192	2.5e-06	4_20519864_A_G	12129	Fms-related tyrosine kinase 3 ligand levels	0.00182468	0.00208276	25.3103	41.8887	22.1684
rs61792394	A	G	A	G	-0.1569	-0.0367677	0.9624	0.97444	kidney cancer	0.7071	0.0978506	GCST90274791	3	170851052	0.0338	3.45e-06	3_170851052_A_G	14286	Fms-related tyrosine kinase 3 ligand levels	0.00150629	0.00178164	25.4943	41.8887	21.5483
rs6453962	T	C	T	C	-0.0559	-0.0801042	0.4699	0.5153	kidney cancer	0.04049	0.0390998	GCST90274791	6	77907355	0.0117	1.77e-06	6_77907355_T_C	14732	Fms-related tyrosine kinase 3 ligand levels	0.00154731	0.00155674	22.9666	41.8887	22.8272
rs67811337	A	C	A	C	0.1083	0.312248	0.081	0.06442	kidney cancer	0.1854	0.235782	GCST90274791	1	6546418	0.024	6.41e-06	1_6546418_A_C	13222	Fms-related tyrosine kinase 3 ligand levels	0.00153792	0.00174617	23.1248	41.8887	20.3627
rs6925032	A	C	A	C	0.0676	0.0595377	0.326	0.363	kidney cancer	0.1416	0.0405057	GCST90274791	6	91008027	0.0128	1.28e-07	6_91008027_A_C	14286	Fms-related tyrosine kinase 3 ligand levels	0.00194884	0.00200817	28.7424	41.8887	27.8916
rs72681653	A	G	A	G	0.1302	0.0354637	0.9447	0.95706	kidney cancer	0.7132	0.0964835	GCST90274791	14	51156734	0.0266	9.84e-07	14_51156734_A_G	14734	Fms-related tyrosine kinase 3 ligand levels	0.00162365	0.00177121	26.1398	41.8887	23.9584
rs73000965	A	T	A	T	0.0588	0.0429075	0.3111	0.2863	kidney cancer	0.3022	0.041588	GCST90274791	11	113982321	0.0125	2.55e-06	11_113982321_A_T	14731	Fms-related tyrosine kinase 3 ligand levels	0.00150006	0.00148197	21.8604	41.8887	22.1276
rs74722523	T	C	T	C	0.3529	-0.214927	0.9914	0.98773	kidney cancer	0.5758	0.384121	GCST90274791	10	105351013	0.076	3.43e-06	10_105351013_T_C	11437	Fms-related tyrosine kinase 3 ligand levels	0.00188201	0.00212364	24.3355	41.8887	21.5614
rs7624160	T	G	T	G	-0.1061	-0.0289761	0.6093	0.636	kidney cancer	0.4671	0.0398458	GCST90274791	3	128381886	0.0119	4.84e-19	3_128381886_T_G	14719	Fms-related tyrosine kinase 3 ligand levels	0.00537252	0.00535964	79.3028	41.8887	79.4945
rs7625643	A	G	A	G	0.0611	0.108316	0.5605	0.5818	kidney cancer	0.1881	0.0822933	GCST90274791	3	141150026	0.0129	2.18e-06	3_141150026_A_G	12404	Fms-related tyrosine kinase 3 ligand levels	0.00180562	0.00183928	22.8527	41.8887	22.4338
rs76428106	T	C	T	C	-1.1019	0.0980337	0.9832	0.98569	kidney cancer	0.5886	0.181253	GCST90274791	13	28604007	0.0524	3.59e-98	13_28604007_T_C	13799	Fms-related tyrosine kinase 3 ligand levels	0.0310553	0.0401112	576.54	41.8887	442.203
rs7726159	A	C	A	C	-0.1191	0.120474	0.3326	0.3538	kidney cancer	0.009417	0.0463981	GCST90274791	5	1282319	0.0128	1.34e-20	5_1282319_A_C	14733	Fms-related tyrosine kinase 3 ligand levels	0.00584287	0.00629741	93.355	41.8887	86.5772
rs77584520	A	T	A	T	0.1313	0.0291704	0.9568	0.9407	kidney cancer	0.7725	0.100898	GCST90274791	1	78494817	0.0293	7.42e-06	1_78494817_A_T	14731	Fms-related tyrosine kinase 3 ligand levels	0.00136154	0.00142516	21.0212	41.8887	20.0814
rs78154669	T	G	T	G	0.0923	0.027988	0.0938	0.08078	kidney cancer	0.7301	0.0811265	GCST90274791	16	81591243	0.0207	8.24e-06	16_81591243_T_G	14721	Fms-related tyrosine kinase 3 ligand levels	0.00134896	0.00144831	21.3485	41.8887	19.8821
rs78429945	T	G	T	G	0.0884	-0.0130149	0.1818	0.1963	kidney cancer	0.8026	0.0520632	GCST90274791	20	30439298	0.016	3.29e-08	20_30439298_T_G	14286	Fms-related tyrosine kinase 3 ligand levels	0.00213249	0.00232481	33.285	41.8887	30.5256
rs78723322	T	C	T	C	-0.1487	-0.0454513	0.0403	0.02454	kidney cancer	0.6825	0.111113	GCST90274791	14	87871738	0.0329	6.19e-06	14_87871738_T_C	14734	Fms-related tyrosine kinase 3 ligand levels	0.00138474	0.00171038	25.2405	41.8887	20.4282
rs871051	T	G	T	G	0.1342	-0.0563587	0.0401	0.04294	kidney cancer	0.5946	0.105901	GCST90274791	13	95950210	0.0301	8.25e-06	13_95950210_T_G	14726	Fms-related tyrosine kinase 3 ligand levels	0.00134822	0.00138645	20.4425	41.8887	19.878
rs9381118	T	C	T	C	0.0643	0.0158733	0.2577	0.2669	kidney cancer	0.7201	0.0442987	GCST90274791	6	41985436	0.0136	2.27e-06	6_41985436_T_C	14285	Fms-related tyrosine kinase 3 ligand levels	0.00156259	0.00158178	22.6283	41.8887	22.3534
rs9554186	A	T	A	T	0.0821	-0.0453557	0.3602	0.3507	kidney cancer	0.603	0.0872072	GCST90274791	13	28455266	0.0128	1.42e-10	13_28455266_A_T	14286	Fms-related tyrosine kinase 3 ligand levels	0.00287189	0.00310673	44.5149	41.8887	41.1402
rs10982156	A	T	A	T	-0.1073	-0.0979431	0.0803	0.0726	kidney cancer	0.2998	0.094461	GCST90274792	9	117088064	0.0236	5.45e-06	9_117088064_A_T	14288	Glial cell line-derived neurotrophic factor levels	0.0014449	0.00170056	24.3355	41.8887	20.6717
rs112594435	T	C	T	C	0.1531	-0.0667236	0.0371	0.0317	kidney cancer	0.5602	0.114538	GCST90274792	6	134688249	0.0333	4.27e-06	6_134688249_T_C	14721	Glial cell line-derived neurotrophic factor levels	0.00143404	0.00167469	24.6912	41.8887	21.1379
rs117195704	A	G	A	G	-0.1377	-0.00737275	0.0386	0.03374	kidney cancer	0.9423	0.101863	GCST90274792	10	61379709	0.0309	8.34e-06	10_61379709_A_G	14723	Glial cell line-derived neurotrophic factor levels	0.00134719	0.00140731	20.7462	41.8887	19.8587
rs11740708	A	G	A	G	-0.3888	0.0652855	0.0906	0.09918	kidney cancer	0.3103	0.0643465	GCST90274792	5	37868088	0.0198	7.56e-86	5_37868088_A_G	14710	Glial cell line-derived neurotrophic factor levels	0.0255464	0.0249095	375.729	41.8887	385.587
rs138691533	A	G	A	G	0.2584	0.215547	0.0148	0.01943	kidney cancer	0.1678	0.156272	GCST90274792	12	98629454	0.0539	1.63e-06	12_98629454_A_G	14731	Glial cell line-derived neurotrophic factor levels	0.00155796	0.00194716	28.7356	41.8887	22.983
rs141731127	T	C	T	C	-0.1315	-0.327532	0.9185	0.93252	kidney cancer	0.2971	0.314128	GCST90274792	10	17966958	0.0295	8.29e-06	10_17966958_T_C	12358	Glial cell line-derived neurotrophic factor levels	0.00160558	0.00258892	32.0717	41.8887	19.8704
rs147483239	T	C	T	C	-0.2148	-0.0670977	0.019	0.01738	kidney cancer	0.6904	0.168455	GCST90274792	3	11787496	0.0485	9.47e-06	3_11787496_T_C	14726	Glial cell line-derived neurotrophic factor levels	0.0013304	0.00171997	25.3685	41.8887	19.6149
rs150807191	A	G	A	G	-0.1719	-0.188259	0.9717	0.97546	kidney cancer	0.1009	0.114757	GCST90274792	8	34985123	0.0387	8.92e-06	8_34985123_A_G	14725	Glial cell line-derived neurotrophic factor levels	0.00133829	0.00162518	23.9664	41.8887	19.7301
rs16945776	A	G	A	G	0.0871	-0.0761254	0.9042	0.8947	kidney cancer	0.2277	0.0631063	GCST90274792	17	12160288	0.0196	8.84e-06	17_12160288_A_G	14731	Glial cell line-derived neurotrophic factor levels	0.00133896	0.0013143	19.3839	41.8887	19.748
rs17353853	A	G	A	G	0.1022	-0.00692392	0.9255	0.9274	kidney cancer	0.9271	0.0756761	GCST90274792	2	165822047	0.0229	8.09e-06	2_165822047_A_G	14288	Glial cell line-derived neurotrophic factor levels	0.00139224	0.00144034	20.6064	41.8887	19.9173
rs2093446	C	G	C	G	0.0606	-0.00259663	0.3	0.3108	kidney cancer	0.9526	0.0436833	GCST90274792	9	5230371	0.0129	2.63e-06	9_5230371_C_G	14288	Glial cell line-derived neurotrophic factor levels	0.00154236	0.00154239	22.0686	41.8887	22.0681
rs2194229	A	T	A	T	-0.1683	-0.034981	0.1296	0.1084	kidney cancer	0.5431	0.057522	GCST90274792	5	37918839	0.0179	5.34e-21	5_37918839_A_T	14288	Glial cell line-derived neurotrophic factor levels	0.00614996	0.00639031	91.8791	41.8887	88.402
rs2453338	A	T	A	T	0.0829	-0.0618754	0.352	0.3589	kidney cancer	0.1433	0.0422758	GCST90274792	5	38094871	0.0124	2.3e-11	5_38094871_A_T	14734	Glial cell line-derived neurotrophic factor levels	0.00302474	0.00313514	46.3321	41.8887	44.6957
rs540456481	T	G	T	G	-0.2941	0.127493	0.0124	0.01022	kidney cancer	0.5368	0.206412	GCST90274792	8	107706686	0.0616	1.8e-06	8_107706686_T_G	10894	Glial cell line-derived neurotrophic factor levels	0.0020884	0.00211847	23.1234	41.8887	22.7944
rs55850217	T	C	T	C	0.0816	-0.0275179	0.3119	0.2996	kidney cancer	0.5762	0.0492319	GCST90274792	19	14805280	0.014	5.59e-09	19_14805280_T_C	11755	Glial cell line-derived neurotrophic factor levels	0.00288219	0.0028581	33.6875	41.8887	33.9722
rs570043519	A	T	A	T	-0.3321	-0.210261	0.02	0.01738	kidney cancer	0.3594	0.229415	GCST90274792	21	20242381	0.0721	4.1e-06	21_20242381_A_T	8911	Glial cell line-derived neurotrophic factor levels	0.00237578	0.00432338	38.6843	41.8887	21.2162
rs57104839	A	G	A	G	0.0915	-0.090253	0.903	0.90082	kidney cancer	0.1614	0.064449	GCST90274792	13	28147359	0.0196	3.04e-06	13_28147359_A_G	14736	Glial cell line-derived neurotrophic factor levels	0.00147696	0.00146667	21.6416	41.8887	21.7937
rs62243355	T	C	T	C	-0.0981	0.00420885	0.0997	0.09305	kidney cancer	0.948	0.0645345	GCST90274792	3	36072052	0.0196	5.58e-07	3_36072052_T_C	14731	Glial cell line-derived neurotrophic factor levels	0.00169791	0.00172763	25.4903	41.8887	25.051
rs72743928	T	C	T	C	0.0871	0.0646452	0.1091	0.1104	kidney cancer	0.2897	0.0610563	GCST90274792	9	98815653	0.0192	5.72e-06	9_98815653_T_C	14288	Glial cell line-derived neurotrophic factor levels	0.00143846	0.00147475	21.0995	41.8887	20.5795
rs77124379	T	C	T	C	-0.1117	0.0321767	0.9259	0.92945	kidney cancer	0.6704	0.0756034	GCST90274792	16	48955894	0.0245	5.14e-06	16_48955894_T_C	14288	Glial cell line-derived neurotrophic factor levels	0.00145289	0.00171206	24.5004	41.8887	20.7862
rs77671113	A	C	A	C	-0.1194	-0.0914847	0.0859	0.08078	kidney cancer	0.21	0.0729796	GCST90274792	10	87694408	0.0208	9.45e-09	10_87694408_A_C	14725	Glial cell line-derived neurotrophic factor levels	0.00223313	0.00223885	33.0366	41.8887	32.952
rs79953230	T	C	T	C	0.1918	0.293968	0.0254	0.03476	kidney cancer	0.032	0.137086	GCST90274792	13	67293674	0.042	4.96e-06	13_67293674_T_C	14719	Glial cell line-derived neurotrophic factor levels	0.00141503	0.00182132	26.8533	41.8887	20.8544
rs9303102	T	G	T	G	0.2096	-0.026934	0.0231	0.01227	kidney cancer	0.8492	0.141654	GCST90274792	17	14221290	0.0453	3.71e-06	17_14221290_T_G	12935	Glial cell line-derived neurotrophic factor levels	0.0016526	0.00198278	25.6942	41.8887	21.4085
rs9409461	A	G	A	G	0.0528	-0.0239118	0.4811	0.4949	kidney cancer	0.5419	0.0392034	GCST90274792	9	94530989	0.0119	9.12e-06	9_94530989_A_G	14288	Glial cell line-derived neurotrophic factor levels	0.00137615	0.00139193	19.9128	41.8887	19.6867
rs111239033	A	G	A	G	0.1021	-0.0317893	0.0699	0.05726	kidney cancer	0.6702	0.074645	GCST90274793	2	43842712	0.0228	7.53e-06	2_43842712_A_G	14732	Hepatocyte growth factor levels	0.00135953	0.00135546	19.9931	41.8887	20.0531
rs114581807	A	G	A	G	0.2031	0.26579	0.0214	0.02045	kidney cancer	0.324	0.26949	GCST90274793	1	190171653	0.0452	7.01e-06	1_190171653_A_G	14734	Hepatocyte growth factor levels	0.00136863	0.0017277	25.4966	41.8887	20.1903
rs144638564	A	G	A	G	-0.3746	-0.197867	0.0114	0.01125	kidney cancer	0.6807	0.480833	GCST90274793	12	114913966	0.0839	8.01e-06	12_114913966_A_G	12031	Hepatocyte growth factor levels	0.00165449	0.00316294	38.1677	41.8887	19.9348
rs145015846	T	C	T	C	0.2333	0.066033	0.0213	0.01636	kidney cancer	0.7006	0.171732	GCST90274793	14	24292539	0.0525	8.84e-06	14_24292539_T_C	14286	Hepatocyte growth factor levels	0.00138058	0.00226928	32.4882	41.8887	19.7474
rs150498795	A	T	A	T	0.1566	-0.122846	0.9642	0.9683	kidney cancer	0.2166	0.0994204	GCST90274793	18	76506666	0.0327	1.68e-06	18_76506666_A_T	14732	Hepatocyte growth factor levels	0.00155457	0.00169303	24.9806	41.8887	22.9344
rs189111993	T	C	T	C	0.266	0.198085	0.0183	0.01534	kidney cancer	0.2728	0.18063	GCST90274793	5	175563330	0.0595	7.8e-06	5_175563330_T_C	11382	Hepatocyte growth factor levels	0.00175317	0.00254228	29.0049	41.8887	19.9862
rs1963492	T	C	T	C	-0.0749	0.00984834	0.1917	0.2035	kidney cancer	0.8454	0.0505066	GCST90274793	8	2653987	0.0168	8.26e-06	8_2653987_T_C	11335	Hepatocyte growth factor levels	0.00175081	0.00173855	19.7374	41.8887	19.8767
rs1986719	T	C	T	C	-0.1954	-0.208233	0.9572	0.98466	kidney cancer	0.1888	0.158456	GCST90274793	17	45959996	0.039	5.44e-07	17_45959996_T_C	14718	Hepatocyte growth factor levels	0.0017029	0.00312842	46.1824	41.8887	25.1027
rs2281532	T	C	T	C	-0.0698	-0.0329365	0.7983	0.7618	kidney cancer	0.506	0.0495227	GCST90274793	20	6103587	0.0151	3.79e-06	20_6103587_T_C	14286	Hepatocyte growth factor levels	0.00149368	0.00156896	22.4463	41.8887	21.3677
rs2737756	A	G	A	G	0.2047	0.143524	0.0276	0.02352	kidney cancer	0.2121	0.115021	GCST90274793	3	128064791	0.0391	1.65e-07	3_128064791_A_G	14718	Hepatocyte growth factor levels	0.00185902	0.00224916	33.1732	41.8887	27.4083
rs34219417	T	C	T	C	0.0992	-0.0155198	0.8959	0.8988	kidney cancer	0.9329	0.184328	GCST90274793	1	38949303	0.0217	4.84e-06	1_38949303_T_C	14286	Hepatocyte growth factor levels	0.0014609	0.00183554	26.2671	41.8887	20.898
rs4290523	T	C	T	C	-0.0992	-0.0124225	0.0942	0.1074	kidney cancer	0.8513	0.0662676	GCST90274793	17	7014969	0.0217	4.84e-06	17_7014969_T_C	12846	Hepatocyte growth factor levels	0.00162442	0.00167933	21.6056	41.8887	20.898
rs4963955	T	C	T	C	0.1359	0.131028	0.9623	0.96728	kidney cancer	0.2396	0.11142	GCST90274793	12	26274153	0.0307	9.57e-06	12_26274153_T_C	14722	Hepatocyte growth factor levels	0.00132946	0.00134005	19.752	41.8887	19.5958
rs57193877	T	C	T	C	0.1572	-0.0223479	0.9611	0.96217	kidney cancer	0.8276	0.102616	GCST90274793	14	65654346	0.0311	4.31e-07	14_65654346_T_C	14725	Hepatocyte growth factor levels	0.00173235	0.00184779	27.2554	41.8887	25.5496
rs5745687	T	C	T	C	-0.1943	0.0291199	0.0608	0.05828	kidney cancer	0.7057	0.0771107	GCST90274793	7	81359051	0.0242	9.83e-16	7_81359051_T_C	14733	Hepatocyte growth factor levels	0.00435699	0.00431159	63.789	41.8887	64.4636
rs5745692	C	G	C	G	-0.1545	-0.0360418	0.964	0.97239	kidney cancer	0.7381	0.10779	GCST90274793	7	81358266	0.0332	3.26e-06	7_81358266_C_G	14716	Hepatocyte growth factor levels	0.00146964	0.00165679	24.4184	41.8887	21.6561
rs61897389	T	G	T	G	-0.0761	0.0297378	0.1322	0.1319	kidney cancer	0.6019	0.057005	GCST90274793	11	47380087	0.0171	8.58e-06	11_47380087_T_G	14723	Hepatocyte growth factor levels	0.00134356	0.00132877	19.5869	41.8887	19.8051
rs6709159	A	G	A	G	0.0564	0.0329511	0.4434	0.4519	kidney cancer	0.3981	0.0389945	GCST90274793	2	108946178	0.0114	7.52e-07	2_108946178_A_G	14734	Hepatocyte growth factor levels	0.00165869	0.0015701	23.1671	41.8887	24.4765
rs72778371	A	G	A	G	-0.0717	-0.0020978	0.2021	0.2147	kidney cancer	0.9844	0.107288	GCST90274793	16	57045498	0.0161	8.45e-06	16_57045498_A_G	12789	Hepatocyte growth factor levels	0.00154862	0.00165799	21.236	41.8887	19.8329
rs73012713	A	G	A	G	-0.222	0.147456	0.0162	0.01738	kidney cancer	0.2711	0.133986	GCST90274793	6	146855017	0.0501	9.37e-06	6_146855017_A_G	14286	Hepatocyte growth factor levels	0.00137273	0.00157093	22.4745	41.8887	19.635
rs739269	T	C	T	C	-0.0556	-0.0557185	0.6561	0.635	kidney cancer	0.1713	0.0407287	GCST90274793	22	38212068	0.0125	8.67e-06	22_38212068_T_C	14286	Hepatocyte growth factor levels	0.00138318	0.00139502	19.9544	41.8887	19.7847
rs7620568	A	G	A	G	-0.0856	0.00657832	0.1397	0.1237	kidney cancer	0.9144	0.0611991	GCST90274793	3	171934440	0.0179	1.73e-06	3_171934440_A_G	12846	Hepatocyte growth factor levels	0.00177733	0.00176126	22.6616	41.8887	22.8687
rs79246709	T	G	T	G	0.1375	-0.10652	0.0427	0.03272	kidney cancer	0.3078	0.104447	GCST90274793	7	19933976	0.0305	6.54e-06	7_19933976_T_G	14719	Hepatocyte growth factor levels	0.00137907	0.00154565	22.7826	41.8887	20.3238
rs80308275	T	C	T	C	-0.1177	-0.130941	0.0698	0.06442	kidney cancer	0.1632	0.0939053	GCST90274793	4	153539149	0.026	5.98e-06	4_153539149_T_C	14731	Hepatocyte growth factor levels	0.00138941	0.00179893	26.5442	41.8887	20.493
rs8106345	A	G	A	G	0.0592	-0.0125788	0.5179	0.546	kidney cancer	0.7766	0.0443301	GCST90274793	19	58888317	0.0127	3.14e-06	19_58888317_A_G	12404	Hepatocyte growth factor levels	0.00174898	0.00175007	21.7425	41.8887	21.7288
rs851612	A	G	A	G	-0.1182	0.138283	0.9405	0.94172	kidney cancer	0.2054	0.109201	GCST90274793	19	42769693	0.0257	4.24e-06	19_42769693_A_G	14286	Hepatocyte growth factor levels	0.00147869	0.00156365	22.3702	41.8887	21.1528
rs12408527	T	C	T	C	-0.0663	-0.0336282	0.6507	0.6616	kidney cancer	0.4705	0.046598	GCST90274794	1	6305053	0.015	9.87e-06	1_6305053_T_C	10279	Interferon gamma levels	0.00189738	0.00199819	20.5765	41.8887	19.5364
rs1392570	A	G	A	G	-0.0627	0.00541463	0.6157	0.5869	kidney cancer	0.8922	0.0399542	GCST90274794	3	20774445	0.0139	6.46e-06	3_20774445_A_G	11345	Interferon gamma levels	0.0017906	0.00186039	21.1418	41.8887	20.3472
rs140562194	T	C	T	C	0.4666	-0.474494	0.0122	0.01329	kidney cancer	0.0496	0.24167	GCST90274794	11	110972327	0.0897	1.97e-07	11_110972327_T_C	7396	Interferon gamma levels	0.00364619	0.00524745	39.0043	41.8887	27.0586
rs146527076	C	G	C	G	0.1935	0.159735	0.9683	0.97546	kidney cancer	0.1894	0.121716	GCST90274794	13	90334795	0.0384	4.68e-07	13_90334795_C_G	11781	Interferon gamma levels	0.00215108	0.00229859	27.1374	41.8887	25.3922
rs1953463	A	G	A	G	-0.0801	0.0335315	0.8282	0.8139	kidney cancer	0.5202	0.0521455	GCST90274794	14	44797800	0.0176	5.34e-06	14_44797800_A_G	11345	Interferon gamma levels	0.00182272	0.0018258	20.7479	41.8887	20.7128
rs34658335	T	C	T	C	0.1163	-0.065975	0.0793	0.06953	kidney cancer	0.4389	0.0852333	GCST90274794	7	10535996	0.0261	8.35e-06	7_10535996_T_C	11345	Interferon gamma levels	0.00174739	0.00197506	22.4475	41.8887	19.8554
rs4810686	T	C	T	C	0.0671	0.0754781	0.5585	0.5828	kidney cancer	0.05633	0.039549	GCST90274794	20	46408844	0.0137	9.69e-07	20_46408844_T_C	11344	Interferon gamma levels	0.00211056	0.00222039	25.2397	41.8887	23.9885
rs539956329	T	C	T	C	-0.1448	-0.0131866	0.9424	0.93763	kidney cancer	0.8865	0.0923854	GCST90274794	11	91764263	0.0325	8.37e-06	11_91764263_T_C	8383	Interferon gamma levels	0.00236291	0.00227628	19.121	41.8887	19.8505
rs58508092	T	G	T	G	0.2431	0.274568	0.0213	0.02863	kidney cancer	0.08567	0.159754	GCST90274794	11	44064200	0.0536	5.75e-06	11_44064200_T_G	8389	Interferon gamma levels	0.00244664	0.00246393	20.7161	41.8887	20.5703
rs61863416	A	G	A	G	0.136	0.135929	0.9427	0.95194	kidney cancer	0.1219	0.0878745	GCST90274794	10	130545142	0.0283	1.54e-06	10_130545142_A_G	11774	Interferon gamma levels	0.00195796	0.00199819	23.5697	41.8887	23.0943
rs61904946	T	G	T	G	0.1257	0.119347	0.0613	0.04499	kidney cancer	0.1479	0.0824794	GCST90274794	11	116241126	0.0282	8.29e-06	11_116241126_T_G	11792	Interferon gamma levels	0.00168239	0.00181839	21.4779	41.8887	19.8688
rs62230781	A	G	A	G	0.2184	-0.0696193	0.0412	0.03067	kidney cancer	0.5375	0.112909	GCST90274794	21	37335521	0.0403	5.98e-08	21_37335521_A_G	11345	Interferon gamma levels	0.00258252	0.00376843	42.907	41.8887	29.3694
rs6442763	A	C	A	C	0.0648	0.0537173	0.4253	0.4673	kidney cancer	0.5259	0.0846906	GCST90274794	3	2921515	0.014	3.68e-06	3_2921515_A_C	11345	Interferon gamma levels	0.00188515	0.00205266	23.3312	41.8887	21.4237
rs67101138	T	G	T	G	0.1461	-0.037079	0.9482	0.95706	kidney cancer	0.7257	0.105683	GCST90274794	2	19234534	0.0307	1.95e-06	2_19234534_T_G	11793	Interferon gamma levels	0.00191708	0.00209682	24.7755	41.8887	22.6477
rs704	A	G	A	G	-0.0635	-0.0824091	0.4705	0.4519	kidney cancer	0.03557	0.0392087	GCST90274794	17	26694861	0.0127	5.73e-07	17_26694861_A_G	11793	Interferon gamma levels	0.00211577	0.00200911	23.7371	41.8887	25
rs74245341	A	C	A	C	0.2414	0.0471964	0.0232	0.01125	kidney cancer	0.8731	0.295491	GCST90274794	15	93585096	0.0533	5.92e-06	15_93585096_A_C	10720	Interferon gamma levels	0.00191019	0.00264118	28.3831	41.8887	20.5126
rs78042482	A	G	A	G	0.2688	0.0665672	0.0145	0.01636	kidney cancer	0.6984	0.171795	GCST90274794	15	58694863	0.0606	9.18e-06	15_58694863_A_G	10890	Interferon gamma levels	0.00180377	0.00206497	22.5299	41.8887	19.6749
rs7909512	A	G	A	G	0.0567	-0.0451646	0.5207	0.5061	kidney cancer	0.2458	0.0389145	GCST90274794	10	3683786	0.0128	9.44e-06	10_3683786_A_G	11775	Interferon gamma levels	0.00166393	0.00160469	18.9224	41.8887	19.6221
rs80064136	A	G	A	G	0.2305	0.0665365	0.9818	0.97444	kidney cancer	0.696	0.17029	GCST90274794	1	46963687	0.0521	9.68e-06	1_46963687_A_G	11791	Interferon gamma levels	0.00165756	0.00189874	22.4269	41.8887	19.5734
rs10067443	T	C	T	C	-0.0753	0.0888312	0.8011	0.7894	kidney cancer	0.07876	0.0505318	GCST90274795	5	19244332	0.0149	4.33e-07	5_19244332_T_C	14296	Interleukin-10 levels	0.00178356	0.00180693	25.875	41.8887	25.5398
rs116018601	T	C	T	C	0.1763	0.129712	0.9715	0.96115	kidney cancer	0.3232	0.1313	GCST90274795	5	132022975	0.0398	9.44e-06	5_132022975_T_C	14727	Interleukin-10 levels	0.00133078	0.00172116	25.3878	41.8887	19.6218
rs12123181	A	G	A	G	-0.0996	0.145257	0.2042	0.2178	kidney cancer	0.1407	0.0986004	GCST90274795	1	206954566	0.0151	4.22e-11	1_206954566_A_G	14296	Interleukin-10 levels	0.00303453	0.0032241	46.2343	41.8887	43.5076
rs1370717	A	G	A	G	-0.0534	0.0780697	0.4388	0.4519	kidney cancer	0.07929	0.0444887	GCST90274795	3	32354387	0.0118	6.03e-06	3_32354387_A_G	14730	Interleukin-10 levels	0.00138858	0.00140442	20.7134	41.8887	20.4795
rs138203589	T	G	T	G	0.1937	0.168182	0.0455	0.0184	kidney cancer	0.2196	0.137001	GCST90274795	2	125939274	0.0418	3.59e-06	2_125939274_T_G	14730	Interleukin-10 levels	0.0014559	0.00325894	48.1546	41.8887	21.4737
rs147027610	T	C	T	C	0.1876	-0.0809932	0.9747	0.97239	kidney cancer	0.4757	0.113557	GCST90274795	13	52566577	0.0416	6.49e-06	13_52566577_T_C	14250	Interleukin-10 levels	0.0014253	0.00173575	24.774	41.8887	20.3366
rs148332061	C	G	C	G	0.1112	0.153501	0.1005	0.1196	kidney cancer	0.4453	0.201108	GCST90274795	7	590757	0.0239	3.28e-06	7_590757_C_G	13232	Interleukin-10 levels	0.00163359	0.00223566	29.6441	41.8887	21.6478
rs150408090	A	G	A	G	0.3666	-0.307749	0.9898	0.98773	kidney cancer	0.3901	0.358082	GCST90274795	6	122709508	0.0761	1.45e-06	6_122709508_A_G	12313	Interleukin-10 levels	0.0018815	0.0027137	33.4993	41.8887	23.2068
rs17632797	A	G	A	G	-0.0772	0.0700856	0.8561	0.8732	kidney cancer	0.2198	0.0571167	GCST90274795	15	95207832	0.0173	8.1e-06	15_95207832_A_G	14296	Interleukin-10 levels	0.00139118	0.00146842	21.0204	41.8887	19.9133
rs17654493	T	C	T	C	0.2951	-0.0655068	0.014	0.01431	kidney cancer	0.7364	0.194599	GCST90274795	6	18825879	0.0626	2.43e-06	6_18825879_T_C	12313	Interleukin-10 levels	0.00180183	0.00240421	29.6696	41.8887	22.2223
rs17747934	A	G	A	G	-0.1551	-0.102365	0.9375	0.96217	kidney cancer	0.3219	0.10334	GCST90274795	20	60272196	0.0342	5.76e-06	20_60272196_A_G	13232	Interleukin-10 levels	0.00155216	0.00281906	37.4017	41.8887	20.567
rs188535859	T	C	T	C	-0.2351	0.0631528	0.0174	0.01022	kidney cancer	0.6743	0.150273	GCST90274795	2	201728383	0.0486	1.32e-06	2_201728383_T_C	14741	Interleukin-10 levels	0.00158517	0.00189	27.9094	41.8887	23.4009
rs28419759	A	C	A	C	-0.0542	-0.0716693	0.5556	0.5685	kidney cancer	0.06612	0.0390014	GCST90274795	4	78929167	0.0121	7.49e-06	4_78929167_A_C	13851	Interleukin-10 levels	0.00144671	0.00145066	20.1193	41.8887	20.0645
rs28651780	T	C	T	C	-0.0746	-0.0972821	0.8437	0.8272	kidney cancer	0.08094	0.0557408	GCST90274795	4	68058232	0.0167	7.93e-06	4_68058232_T_C	14296	Interleukin-10 levels	0.00139407	0.00146776	21.011	41.8887	19.9547
rs28929474	T	C	T	C	0.2027	0.134217	0.0203	0.01738	kidney cancer	0.3067	0.131306	GCST90274795	14	94844947	0.0451	6.97e-06	14_94844947_T_C	14744	Interleukin-10 levels	0.00136837	0.00163428	24.132	41.8887	20.2001
rs3135932	A	G	A	G	-0.1597	-0.0390527	0.823	0.8344	kidney cancer	0.4526	0.0519949	GCST90274795	11	117864063	0.0154	3.39e-25	11_117864063_A_G	14744	Interleukin-10 levels	0.00724195	0.00743041	110.359	41.8887	107.54
rs34059323	A	G	A	G	-0.1789	0.0319035	0.0275	0.02352	kidney cancer	0.8102	0.132838	GCST90274795	7	148496619	0.0401	8.14e-06	7_148496619_A_G	14744	Interleukin-10 levels	0.00134831	0.00171188	25.2798	41.8887	19.9036
rs3769274	A	G	A	G	0.0771	-0.0720332	0.8403	0.8272	kidney cancer	0.1657	0.0519662	GCST90274795	2	173757986	0.0162	1.94e-06	2_173757986_A_G	14742	Interleukin-10 levels	0.00153431	0.00159543	23.5542	41.8887	22.6505
rs385697	T	C	T	C	0.0555	-0.0151136	0.6126	0.5951	kidney cancer	0.7072	0.0402366	GCST90274795	6	7880027	0.0119	3.1e-06	6_7880027_T_C	14727	Interleukin-10 levels	0.00147501	0.00146202	21.5597	41.8887	21.7516
rs389239	A	G	A	G	-0.0574	0.0380662	0.6162	0.6196	kidney cancer	0.3511	0.0408235	GCST90274795	6	169465075	0.0125	4.39e-06	6_169465075_A_G	14296	Interleukin-10 levels	0.00147302	0.0015584	22.3106	41.8887	21.0865
rs398518	A	G	A	G	-0.1293	0.0291704	0.9146	0.93354	kidney cancer	0.6812	0.0710042	GCST90274795	3	8954959	0.0218	3.01e-09	3_8954959_A_G	14296	Interleukin-10 levels	0.00245506	0.00261166	37.4288	41.8887	35.179
rs4655953	A	G	A	G	0.0565	0.00511305	0.3683	0.3528	kidney cancer	0.8981	0.0399264	GCST90274795	1	87832695	0.0121	3.02e-06	1_87832695_A_G	14722	Interleukin-10 levels	0.00147902	0.00148539	21.8974	41.8887	21.8035
rs66624860	T	C	T	C	0.0681	0.0498207	0.2791	0.2914	kidney cancer	0.2613	0.0443511	GCST90274795	8	61861039	0.0143	1.91e-06	8_61861039_T_C	12799	Interleukin-10 levels	0.00176907	0.0018662	23.9265	41.8887	22.6789
rs67037615	T	C	T	C	-0.1528	-0.0101514	0.8893	0.8681	kidney cancer	0.8825	0.0686827	GCST90274795	6	32453163	0.0196	6.39e-15	6_32453163_T_C	14296	Interleukin-10 levels	0.00423388	0.00459698	66.0127	41.8887	60.7763
rs72661933	A	C	A	C	-0.2388	-0.0875206	0.9811	0.98569	kidney cancer	0.6445	0.189678	GCST90274795	13	113612154	0.0535	8.06e-06	13_113612154_A_C	13809	Interleukin-10 levels	0.00144091	0.00211482	29.2612	41.8887	19.9233
rs72701782	A	G	A	G	0.0981	-0.0211742	0.0999	0.1329	kidney cancer	0.7573	0.0685188	GCST90274795	4	185304872	0.0211	3.33e-06	4_185304872_A_G	14296	Interleukin-10 levels	0.00150995	0.00173071	24.7817	41.8887	21.6159
rs73226323	T	C	T	C	0.1847	-0.265268	0.9755	0.96728	kidney cancer	0.02646	0.119523	GCST90274795	3	111531258	0.0415	8.56e-06	3_111531258_T_C	14738	Interleukin-10 levels	0.00134238	0.00163064	24.0683	41.8887	19.8079
rs7500869	A	C	A	C	-0.0714	-0.0650384	0.1848	0.2096	kidney cancer	0.2821	0.0604663	GCST90274795	16	11009587	0.0159	7.1e-06	16_11009587_A_C	14743	Interleukin-10 levels	0.0013661	0.00153601	22.6771	41.8887	20.1652
rs76932862	T	C	T	C	0.1401	-0.144447	0.1028	0.1125	kidney cancer	0.4304	0.18319	GCST90274795	14	20318041	0.0291	1.48e-06	14_20318041_T_C	12412	Interleukin-10 levels	0.00186427	0.00362067	45.0958	41.8887	23.1788
rs79438518	A	T	A	T	-0.2845	0.194435	0.0122	0.01431	kidney cancer	0.2893	0.183488	GCST90274795	9	18625666	0.0618	4.15e-06	9_18625666_A_T	13809	Interleukin-10 levels	0.00153258	0.00195085	26.988	41.8887	21.1928
rs9266257	C	G	C	G	-0.065	-0.15495	0.6959	0.7546	kidney cancer	0.07192	0.0861015	GCST90274795	6	31325886	0.0129	4.69e-07	6_31325886_C_G	14728	Interleukin-10 levels	0.00172113	0.00178822	26.3804	41.8887	25.3891
rs9975090	A	G	A	G	0.0551	0.00518653	0.5972	0.5767	kidney cancer	0.9095	0.0456282	GCST90274795	21	43024340	0.0123	7.48e-06	21_43024340_A_G	14296	Interleukin-10 levels	0.00140194	0.00146064	20.9089	41.8887	20.0675
rs10091841	T	G	T	G	0.064	-0.00883895	0.4945	0.4519	kidney cancer	0.8206	0.038977	GCST90274796	8	9104264	0.0135	2.13e-06	8_9104264_T_G	11345	Interleukin-10 receptor subunit alpha levels	0.00197745	0.00204775	23.2753	41.8887	22.4746
rs12026492	T	C	T	C	0.0709	0.120925	0.2527	0.274	kidney cancer	0.005914	0.0439328	GCST90274796	1	226676794	0.0156	5.5e-06	1_226676794_T_C	11345	Interleukin-10 receptor subunit alpha levels	0.00181771	0.00189855	21.5762	41.8887	20.6559
rs1377036	A	G	A	G	-0.0791	-0.0254204	0.8076	0.8272	kidney cancer	0.6047	0.0491069	GCST90274796	20	12662915	0.0179	9.92e-06	20_12662915_A_G	9907	Interleukin-10 receptor subunit alpha levels	0.0019676	0.00194439	19.2967	41.8887	19.5275
rs143313574	T	C	T	C	-0.3868	-0.58712	0.0107	0.01125	kidney cancer	0.3085	0.576526	GCST90274796	16	5247086	0.0841	4.24e-06	16_5247086_T_C	9956	Interleukin-10 receptor subunit alpha levels	0.00212061	0.00316749	31.6293	41.8887	21.1534
rs17832137	A	G	A	G	0.1676	-0.0113355	0.0481	0.05521	kidney cancer	0.9009	0.0910304	GCST90274796	14	55005535	0.0343	1.03e-06	14_55005535_A_G	10289	Interleukin-10 receptor subunit alpha levels	0.0023156	0.00257226	26.5291	41.8887	23.8759
rs180893431	A	C	A	C	0.4057	-0.0239854	0.9896	0.98569	kidney cancer	0.9135	0.220809	GCST90274796	6	78703747	0.0865	2.73e-06	6_78703747_A_C	9340	Interleukin-10 receptor subunit alpha levels	0.00235018	0.00338792	31.7439	41.8887	21.9977
rs28408877	C	G	C	G	-0.069	0.00159872	0.7429	0.7321	kidney cancer	0.9709	0.0438252	GCST90274796	1	247347252	0.0153	6.49e-06	1_247347252_C_G	11345	Interleukin-10 receptor subunit alpha levels	0.00178982	0.0018187	20.6671	41.8887	20.3383
rs286605	T	G	T	G	0.0623	0.0506619	0.5891	0.5665	kidney cancer	0.1998	0.0395141	GCST90274796	5	154443639	0.0131	1.98e-06	5_154443639_T_G	11793	Interleukin-10 receptor subunit alpha levels	0.00191448	0.00187902	22.1972	41.8887	22.6169
rs3135932	A	G	A	G	-0.0844	-0.0390527	0.8171	0.8344	kidney cancer	0.4526	0.0519949	GCST90274796	11	117864063	0.0168	5.07e-07	11_117864063_A_G	11793	Interleukin-10 receptor subunit alpha levels	0.00213593	0.00212914	25.1582	41.8887	25.2387
rs41272625	T	G	T	G	0.082	0.00702461	0.1526	0.1656	kidney cancer	0.8948	0.053123	GCST90274796	3	158540291	0.0179	4.63e-06	3_158540291_T_G	11784	Interleukin-10 receptor subunit alpha levels	0.00177799	0.001739	20.5246	41.8887	20.9856
rs492616	A	G	A	G	-0.0835	0.0411419	0.8497	0.8609	kidney cancer	0.4739	0.0574489	GCST90274796	6	116712455	0.0189	9.96e-06	6_116712455_A_G	11344	Interleukin-10 receptor subunit alpha levels	0.00171796	0.00178085	20.2344	41.8887	19.5186
rs62262707	A	C	A	C	0.2156	-0.529157	0.0253	0.01636	kidney cancer	0.1804	0.395033	GCST90274796	3	83110489	0.0483	8.05e-06	3_83110489_A_C	11345	Interleukin-10 receptor subunit alpha levels	0.00175353	0.00229255	26.0642	41.8887	19.9252
rs6670799	A	G	A	G	-0.1247	0.0371828	0.0839	0.08998	kidney cancer	0.6062	0.0721288	GCST90274796	1	56566352	0.0252	7.48e-07	1_56566352_A_G	11345	Interleukin-10 receptor subunit alpha levels	0.00215411	0.00239038	27.1791	41.8887	24.4868
rs79202194	T	C	T	C	-0.0993	0.00662188	0.1001	0.0818	kidney cancer	0.922	0.067629	GCST90274796	8	27864161	0.0224	9.29e-06	8_27864161_T_C	11792	Interleukin-10 receptor subunit alpha levels	0.00166405	0.00177647	20.9818	41.8887	19.6518
rs80137559	T	C	T	C	0.2347	-0.0212236	0.9822	0.98057	kidney cancer	0.8873	0.149756	GCST90274796	10	18335103	0.0511	4.37e-06	10_18335103_T_C	11791	Interleukin-10 receptor subunit alpha levels	0.0017862	0.00192609	22.7505	41.8887	21.0952
rs9472032	A	C	A	C	0.0968	-0.0372958	0.1006	0.1145	kidney cancer	0.5676	0.0652492	GCST90274796	6	43294041	0.0214	6.09e-06	6_43294041_A_C	11793	Interleukin-10 receptor subunit alpha levels	0.00173229	0.00169563	20.0272	41.8887	20.4608
rs9548767	T	G	T	G	-0.0686	-0.0216636	0.2251	0.2464	kidney cancer	0.6411	0.0464724	GCST90274796	13	31511360	0.0155	9.61e-06	13_31511360_T_G	11781	Interleukin-10 receptor subunit alpha levels	0.00166018	0.00164172	19.3696	41.8887	19.5878
rs958402	T	C	T	C	0.06	-0.0619818	0.4233	0.4059	kidney cancer	0.1203	0.0398978	GCST90274796	8	97437587	0.0134	7.55e-06	8_97437587_T_C	11345	Interleukin-10 receptor subunit alpha levels	0.0017644	0.00175764	19.9721	41.8887	20.049
rs111850948	A	G	A	G	-0.0843	0.00390762	0.1348	0.1268	kidney cancer	0.9441	0.0557295	GCST90274797	7	25740142	0.0181	3.2e-06	7_25740142_A_G	14286	Interleukin-10 receptor subunit beta levels	0.00151631	0.00165764	23.7171	41.8887	21.6919
rs112798338	T	C	T	C	0.1926	0.101811	0.026	0.02045	kidney cancer	0.4455	0.133446	GCST90274797	1	228433772	0.0411	2.78e-06	1_228433772_T_C	14286	Interleukin-10 receptor subunit beta levels	0.00153501	0.00187878	26.8869	41.8887	21.9598
rs114288486	T	C	T	C	0.1449	-0.125134	0.0363	0.03681	kidney cancer	0.2792	0.115638	GCST90274797	1	212796908	0.0311	3.17e-06	1_212796908_T_C	14730	Interleukin-10 receptor subunit beta levels	0.00147174	0.00146898	21.6669	41.8887	21.7078
rs115242284	T	C	T	C	-0.1662	0.247564	0.027		kidney cancer	0.02295	0.108855	GCST90274797	4	183615376	0.0373	8.36e-06	4_183615376_T_C	14724	Interleukin-10 receptor subunit beta levels	0.00134677	0.00145134	21.3977	41.8887	19.8538
rs1153572	T	C	T	C	-0.0548	0.0595377	0.5866	0.5726	kidney cancer	0.1323	0.0395575	GCST90274797	3	4275803	0.0119	4.12e-06	3_4275803_T_C	14286	Interleukin-10 receptor subunit beta levels	0.00148243	0.00145648	20.8347	41.8887	21.2064
rs116315732	T	C	T	C	0.1988	0.0982746	0.0212	0.01943	kidney cancer	0.4592	0.132774	GCST90274797	2	176630651	0.0402	7.6e-07	2_176630651_T_C	14734	Interleukin-10 receptor subunit beta levels	0.00165729	0.00164018	24.2029	41.8887	24.4557
rs116898411	A	G	A	G	-0.1593	0.116627	0.96	0.95194	kidney cancer	0.3689	0.129797	GCST90274797	8	128868102	0.0349	5.01e-06	8_128868102_A_G	14286	Interleukin-10 receptor subunit beta levels	0.00145646	0.00194891	27.8927	41.8887	20.8344
rs117092856	A	G	A	G	-0.3461	-0.115291	0.0088	0.01125	kidney cancer	0.8392	0.568169	GCST90274797	6	150298636	0.0783	9.86e-06	6_150298636_A_G	13420	Interleukin-10 receptor subunit beta levels	0.00145399	0.00208967	28.0979	41.8887	19.538
rs11731108	C	G	C	G	-0.0592	-0.0386369	0.7134	0.6871	kidney cancer	0.3533	0.0416253	GCST90274797	4	185140403	0.0132	7.3e-06	4_185140403_C_G	14286	Interleukin-10 receptor subunit beta levels	0.00140616	0.00143312	20.5001	41.8887	20.1139
rs117883662	C	G	C	G	-0.4295	0.11947	0.9904	0.98569	kidney cancer	0.8343	0.57111	GCST90274797	19	49553051	0.0907	2.19e-06	19_49553051_C_G	8938	Interleukin-10 receptor subunit beta levels	0.00250311	0.00350783	31.4563	41.8887	22.4239
rs12087642	A	G	A	G	-0.0533	0.0103534	0.3491	0.3436	kidney cancer	0.7987	0.0405969	GCST90274797	1	216769382	0.0118	6.27e-06	1_216769382_A_G	14719	Interleukin-10 receptor subunit beta levels	0.00138442	0.00129107	19.0252	41.8887	20.4028
rs142421172	A	G	A	G	0.208	0.0401972	0.0438	0.05419	kidney cancer	0.6844	0.0988943	GCST90274797	1	179682087	0.031	1.95e-11	1_179682087_A_G	12840	Interleukin-10 receptor subunit beta levels	0.00349451	0.00362393	46.6932	41.8887	45.0198
rs149156511	A	G	A	G	0.2066	-0.130853	0.0323	0.02658	kidney cancer	0.3632	0.143907	GCST90274797	20	39437913	0.0444	3.27e-06	20_39437913_A_G	14286	Interleukin-10 receptor subunit beta levels	0.00151352	0.0026683	38.2159	41.8887	21.6518
rs1605333	C	G	C	G	-0.0601	0.0282966	0.6484	0.6677	kidney cancer	0.4935	0.0413238	GCST90274797	12	58388232	0.0124	1.25e-06	12_58388232_C_G	13237	Interleukin-10 receptor subunit beta levels	0.00177179	0.00164691	21.8329	41.8887	23.4912
rs192325200	A	G	A	G	-0.2327	0.154179	0.9827	0.98671	kidney cancer	0.3478	0.164219	GCST90274797	10	71477178	0.0505	4.07e-06	10_71477178_A_G	13867	Interleukin-10 receptor subunit beta levels	0.00152906	0.00184115	25.5747	41.8887	21.2329
rs2266590	A	G	A	G	-0.4105	-0.00954541	0.5426	0.5583	kidney cancer	0.8078	0.0392387	GCST90274797	21	34659396	0.0108	1e-300	21_34659396_A_G	14714	Interleukin-10 receptor subunit beta levels	0.0894182	0.0836435	1342.89	41.8887	1444.7
rs34361138	A	G	A	G	0.0532	0.0371031	0.5488	0.5123	kidney cancer	0.3532	0.0399645	GCST90274797	6	41174158	0.0113	2.5e-06	6_41174158_A_G	14732	Interleukin-10 receptor subunit beta levels	0.00150249	0.00140164	20.6751	41.8887	22.1649
rs4686528	A	G	A	G	-0.1435	-0.0163327	0.9488	0.9683	kidney cancer	0.8763	0.104924	GCST90274797	3	189486023	0.0317	5.99e-06	3_189486023_A_G	14286	Interleukin-10 receptor subunit beta levels	0.00143256	0.00200068	28.6351	41.8887	20.492
rs55780441	T	C	T	C	0.1783	-0.205795	0.9674	0.97239	kidney cancer	0.1227	0.133327	GCST90274797	16	13209083	0.0348	3e-07	16_13209083_T_C	14734	Interleukin-10 receptor subunit beta levels	0.00177873	0.00200519	29.5999	41.8887	26.2509
rs6517157	T	C	T	C	0.1509	0.0709591	0.9258	0.94274	kidney cancer	0.3844	0.0815793	GCST90274797	21	34634808	0.0251	1.83e-09	21_34634808_T_C	14286	Interleukin-10 receptor subunit beta levels	0.00252397	0.00312845	44.8271	41.8887	36.1436
rs6584485	T	C	T	C	0.0743	-0.00079968	0.8362	0.82	kidney cancer	0.9878	0.0522973	GCST90274797	10	103937244	0.0161	3.93e-06	10_103937244_T_C	14286	Interleukin-10 receptor subunit beta levels	0.00148877	0.00151228	21.6341	41.8887	21.2974
rs75710908	A	G	A	G	0.1586	-0.027474	0.9665	0.97342	kidney cancer	0.8148	0.117291	GCST90274797	21	34510084	0.0341	3.3e-06	21_34510084_A_G	14708	Interleukin-10 receptor subunit beta levels	0.00146881	0.00162886	23.9931	41.8887	21.632
rs7574167	A	G	A	G	0.0637	0.0864297	0.2684	0.2546	kidney cancer	0.3639	0.0951912	GCST90274797	2	43150924	0.0135	2.38e-06	2_43150924_A_G	12832	Interleukin-10 receptor subunit beta levels	0.00173233	0.00159355	20.4778	41.8887	22.2644
rs7815666	T	C	T	C	0.0512	0.00409162	0.5351	0.5603	kidney cancer	0.9169	0.0392145	GCST90274797	8	18274205	0.0113	5.87e-06	8_18274205_T_C	14732	Interleukin-10 receptor subunit beta levels	0.00139179	0.00130426	19.2369	41.8887	20.5297
rs7855466	T	C	T	C	0.0861	0.05509	0.1723	0.1748	kidney cancer	0.3278	0.0562973	GCST90274797	9	136121303	0.0169	3.49e-07	9_136121303_T_C	11783	Interleukin-10 receptor subunit beta levels	0.00219834	0.00211444	24.963	41.8887	25.9557
rs8064909	T	C	T	C	-0.0608	-0.0465018	0.4413	0.4468	kidney cancer	0.2974	0.0446264	GCST90274797	17	74093726	0.0135	6.68e-06	17_74093726_T_C	10281	Interleukin-10 receptor subunit beta levels	0.00196939	0.00182285	18.7712	41.8887	20.2833
rs9685374	A	G	A	G	-0.0618	-0.0103463	0.2721	0.2556	kidney cancer	0.8165	0.0445867	GCST90274797	4	119751261	0.0134	3.99e-06	4_119751261_A_G	14286	Interleukin-10 receptor subunit beta levels	0.00148686	0.00151289	21.6429	41.8887	21.27
rs10043720	A	G	A	G	-0.4981	-0.00591747	0.3025	0.3078	kidney cancer	0.887	0.0416426	GCST90274798	5	158767333	0.0132	1e-300	5_158767333_A_G	12402	Interleukin-12 subunit beta levels	0.103004	0.104697	1450.05	41.8887	1423.92
rs10769256	T	C	T	C	0.0585	0.0812101	0.4	0.3957	kidney cancer	0.07189	0.0451214	GCST90274798	11	47378396	0.0123	1.97e-06	11_47378396_T_C	14091	Interleukin-12 subunit beta levels	0.00160297	0.00164268	23.1818	41.8887	22.6205
rs10774625	A	G	A	G	0.131	-0.0371828	0.49	0.4775	kidney cancer	0.337	0.0387276	GCST90274798	12	111910219	0.0131	1.52e-23	12_111910219_A_G	11784	Interleukin-12 subunit beta levels	0.00841609	0.00857707	101.929	41.8887	100
rs1110261	A	G	A	G	0.0843	-0.113686	0.2045	0.2198	kidney cancer	0.02587	0.0510223	GCST90274798	3	5019936	0.0148	1.23e-08	3_5019936_A_G	14287	Interleukin-12 subunit beta levels	0.00226603	0.00231216	33.1058	41.8887	32.4438
rs12588969	C	G	C	G	-0.1297	0.0652855	0.6875	0.6933	kidney cancer	0.178	0.0484695	GCST90274798	14	103230758	0.0127	1.74e-24	14_103230758_C_G	14287	Interleukin-12 subunit beta levels	0.00724825	0.00722824	104.007	41.8887	104.297
rs12639588	A	G	A	G	-0.2517	0.0429637	0.5635	0.5511	kidney cancer	0.2714	0.0390634	GCST90274798	3	188121263	0.0117	1.18e-102	3_188121263_A_G	14287	Interleukin-12 subunit beta levels	0.031381	0.0311655	459.521	41.8887	462.801
rs12766137	C	G	C	G	0.0709	0.0120274	0.8109	0.82	kidney cancer	0.8125	0.0507052	GCST90274798	10	94525783	0.0149	1.95e-06	10_94525783_C_G	14726	Interleukin-12 subunit beta levels	0.00153542	0.00154163	22.7341	41.8887	22.6423
rs142057772	A	G	A	G	-0.1893	0.0179603	0.03	0.01022	kidney cancer	0.8707	0.110342	GCST90274798	12	17251217	0.0363	1.84e-07	12_17251217_A_G	14728	Interleukin-12 subunit beta levels	0.00184333	0.00208557	30.7763	41.8887	27.1949
rs148549227	T	C	T	C	0.1088	0.0612373	0.0889	0.091	kidney cancer	0.3834	0.0702546	GCST90274798	3	171348710	0.0228	1.82e-06	3_171348710_T_C	12403	Interleukin-12 subunit beta levels	0.00183288	0.00191759	23.8257	41.8887	22.7713
rs2249989	C	G	C	G	-0.0669	-0.0607059	0.2514	0.2331	kidney cancer	0.2475	0.0524936	GCST90274798	10	73105421	0.0138	1.25e-06	10_73105421_C_G	14286	Interleukin-12 subunit beta levels	0.00164259	0.0016846	24.1035	41.8887	23.5014
rs3130510	A	G	A	G	0.1155	0.0246001	0.2275	0.1912	kidney cancer	0.5819	0.0446778	GCST90274798	6	31154493	0.014	1.58e-16	6_31154493_A_G	14735	Interleukin-12 subunit beta levels	0.00459849	0.00468893	69.4075	41.8887	68.0625
rs539598	T	C	T	C	-0.0672	-0.125398	0.2822	0.2904	kidney cancer	0.004556	0.0442033	GCST90274798	11	96026074	0.0129	1.9e-07	11_96026074_T_C	14731	Interleukin-12 subunit beta levels	0.00183902	0.00182949	26.9959	41.8887	27.1368
rs568297	T	C	T	C	-0.0699	-0.00179838	0.6522	0.6677	kidney cancer	0.9642	0.0400676	GCST90274798	12	121221763	0.0122	1.01e-08	12_121221763_T_C	14725	Interleukin-12 subunit beta levels	0.0022247	0.00221664	32.7081	41.8887	32.8273
rs61938962	T	C	T	C	0.0713	-0.0677521	0.3226	0.3292	kidney cancer	0.1012	0.0413359	GCST90274798	12	56446766	0.0125	1.17e-08	12_56446766_T_C	14732	Interleukin-12 subunit beta levels	0.00220393	0.00222187	32.801	41.8887	32.5356
rs6870256	T	C	T	C	0.0725	0.026934	0.5786	0.5409	kidney cancer	0.4982	0.0397653	GCST90274798	5	158847071	0.0119	1.11e-09	5_158847071_T_C	14716	Interleukin-12 subunit beta levels	0.00251627	0.00256318	37.8115	41.8887	37.1178
rs6968201	T	G	T	G	-0.0622	0.0295588	0.5425	0.5399	kidney cancer	0.4533	0.0394157	GCST90274798	7	6408796	0.0119	1.72e-07	7_6408796_T_G	14287	Interleukin-12 subunit beta levels	0.00190887	0.00192044	27.4863	41.8887	27.3204
rs73416208	A	G	A	G	-0.1477	-0.0285875	0.0654	0.0593	kidney cancer	0.7399	0.0861105	GCST90274798	22	37881211	0.0246	1.92e-09	22_37881211_A_G	14729	Interleukin-12 subunit beta levels	0.00244183	0.00266682	39.3793	41.8887	36.0488
rs76428106	T	C	T	C	-0.3406	0.0980337	0.9832	0.98569	kidney cancer	0.5886	0.181253	GCST90274798	13	28604007	0.0535	1.94e-10	13_28604007_T_C	13800	Interleukin-12 subunit beta levels	0.00292881	0.0038324	53.0828	41.8887	40.5305
rs8026767	A	G	A	G	-0.0743	0.0760175	0.2595	0.2536	kidney cancer	0.08159	0.0436497	GCST90274798	15	80260554	0.0132	1.81e-08	15_80260554_A_G	14734	Interleukin-12 subunit beta levels	0.00214603	0.00212163	31.3223	41.8887	31.6833
rs911263	T	C	T	C	0.0781	-0.0643823	0.7185	0.6503	kidney cancer	0.1276	0.0422557	GCST90274798	14	68753593	0.0128	1.05e-09	14_68753593_T_C	14735	Interleukin-12 subunit beta levels	0.00252055	0.00246739	36.4419	41.8887	37.2291
rs10446322	A	G	A	G	0.064	0.00169856	0.3961	0.4141	kidney cancer	0.9653	0.0390439	GCST90274799	3	143068250	0.0132	1.24e-06	3_143068250_A_G	11777	Interleukin-13 levels	0.00199244	0.00195957	23.1192	41.8887	23.5078
rs10752781	T	G	T	G	0.0595	0.0397809	0.4904	0.4642	kidney cancer	0.3068	0.0389261	GCST90274799	1	234425332	0.0134	8.98e-06	1_234425332_T_G	11344	Interleukin-13 levels	0.00173532	0.00176947	20.1049	41.8887	19.7163
rs10893042	C	G	C	G	-0.0702	0.0110609	0.6744	0.6299	kidney cancer	0.7889	0.0413124	GCST90274799	11	123332970	0.015	2.87e-06	11_123332970_C_G	11344	Interleukin-13 levels	0.00192737	0.00216424	24.6001	41.8887	21.9024
rs10917637	A	G	A	G	0.0692	0.0267547	0.3447	0.3528	kidney cancer	0.5076	0.0403797	GCST90274799	1	162878651	0.0136	3.61e-07	1_162878651_A_G	11772	Interleukin-13 levels	0.00219484	0.00216333	25.5176	41.8887	25.8901
rs11251952	A	G	A	G	-0.1845	-0.00925702	0.0751	0.02045	kidney cancer	0.9506	0.149419	GCST90274799	10	3623961	0.0397	3.36e-06	10_3623961_A_G	11344	Interleukin-13 levels	0.00190062	0.00472887	53.8897	41.8887	21.5979
rs117322078	T	C	T	C	0.2081	-0.0453112	0.9743	0.98057	kidney cancer	0.7647	0.151383	GCST90274799	22	37976432	0.046	6.07e-06	22_37976432_T_C	11781	Interleukin-13 levels	0.00173447	0.0021687	25.6007	41.8887	20.4658
rs11757926	C	G	C	G	0.1458	-0.0208151	0.9259	0.94683	kidney cancer	0.8073	0.0853392	GCST90274799	6	41584211	0.0327	8.25e-06	6_41584211_C_G	7943	Interleukin-13 levels	0.00249723	0.00291694	23.2312	41.8887	19.8801
rs12146346	T	G	T	G	0.0734	-0.0601539	0.3902	0.3599	kidney cancer	0.188	0.0456917	GCST90274799	10	53942324	0.0155	2.19e-06	10_53942324_T_G	8388	Interleukin-13 levels	0.00266694	0.00256388	21.5559	41.8887	22.4248
rs13021250	C	G	C	G	0.1112	-0.0674227	0.9154	0.90695	kidney cancer	0.3378	0.0703403	GCST90274799	2	8361137	0.0248	7.33e-06	2_8361137_C_G	10915	Interleukin-13 levels	0.00183892	0.00191523	20.941	41.8887	20.1051
rs13119159	A	G	A	G	0.0739	-0.0581589	0.4958	0.5123	kidney cancer	0.1338	0.0387911	GCST90274799	4	40938582	0.0132	2.16e-08	4_40938582_A_G	11344	Interleukin-13 levels	0.00275583	0.00273041	31.0531	41.8887	31.343
rs13297881	T	G	T	G	0.1562	0.0305292	0.9494	0.95603	kidney cancer	0.765	0.102131	GCST90274799	9	4934758	0.035	8.09e-06	9_4934758_T_G	11344	Interleukin-13 levels	0.00175297	0.00234418	26.6502	41.8887	19.9171
rs141538472	T	C	T	C	0.3156	0.851475	0.9803	0.9816	kidney cancer	0.121	0.54913	GCST90274799	3	162592726	0.0692	5.1e-06	3_162592726_T_C	9093	Interleukin-13 levels	0.00228275	0.00384706	35.1087	41.8887	20.7999
rs141637150	T	C	T	C	0.206	-0.0540146	0.0279	0.04601	kidney cancer	0.7371	0.160903	GCST90274799	19	48502692	0.0466	9.84e-06	19_48502692_T_C	11779	Interleukin-13 levels	0.00165656	0.00230186	27.1716	41.8887	19.5417
rs141726773	T	C	T	C	0.2093	-0.0944206	0.9682	0.9816	kidney cancer	0.5135	0.144507	GCST90274799	13	41810092	0.0446	2.69e-06	13_41810092_T_C	11344	Interleukin-13 levels	0.00193792	0.00269749	30.6777	41.8887	22.0226
rs1472639	A	C	A	C	0.0677	-0.040566	0.2405		kidney cancer	0.3932	0.0475107	GCST90274799	6	55271616	0.015	6.38e-06	6_55271616_A_C	11790	Interleukin-13 levels	0.00172506	0.00167436	19.7705	41.8887	20.3702
rs149979178	A	G	A	G	0.1832	-0.18838	0.9229	0.8947	kidney cancer	0.3443	0.199196	GCST90274799	7	61999529	0.039	2.63e-06	7_61999529_A_G	6901	Interleukin-13 levels	0.00318822	0.00477628	33.1097	41.8887	22.0659
rs181829077	A	C	A	C	0.448	-0.545935	0.9937	0.98875	kidney cancer	0.1784	0.405689	GCST90274799	1	210429399	0.0997	7.01e-06	1_210429399_A_C	9956	Interleukin-13 levels	0.00202436	0.00251294	25.0768	41.8887	20.1914
rs183684201	C	G	C	G	-0.2968	-0.287949	0.9858	0.98671	kidney cancer	0.4412	0.373878	GCST90274799	5	9974643	0.0628	2.29e-06	5_9974643_C_G	11782	Interleukin-13 levels	0.00189252	0.00246624	29.1241	41.8887	22.3362
rs2073696	A	G	A	G	-0.0992	0.0948555	0.112	0.1135	kidney cancer	0.4611	0.128699	GCST90274799	8	17271300	0.0219	5.91e-06	8_17271300_A_G	11782	Interleukin-13 levels	0.00173874	0.00195742	23.1036	41.8887	20.518
rs2485365	A	G	A	G	0.0579	0.0690286	0.4703	0.4724	kidney cancer	0.07559	0.0388485	GCST90274799	6	159512373	0.0129	7.18e-06	6_159512373_A_G	11776	Interleukin-13 levels	0.00170809	0.00167029	19.6989	41.8887	20.1455
rs3119485	A	T	A	T	-0.1308	0.0275768	0.094	0.1012	kidney cancer	0.6902	0.0691869	GCST90274799	21	14817382	0.0293	8.04e-06	21_14817382_A_T	7523	Interleukin-13 levels	0.00264275	0.00291408	21.9809	41.8887	19.9288
rs36038515	A	G	A	G	0.0892	-0.00149888	0.1389	0.1268	kidney cancer	0.9783	0.0551052	GCST90274799	3	8912627	0.0197	5.96e-06	3_8912627_A_G	11344	Interleukin-13 levels	0.00180436	0.00190334	21.6288	41.8887	20.502
rs36107074	T	C	T	C	-0.0706	0.0142003	0.2438	0.2301	kidney cancer	0.7593	0.0463458	GCST90274799	11	11427220	0.0159	8.99e-06	11_11427220_T_C	11343	Interleukin-13 levels	0.00173544	0.00183785	20.8814	41.8887	19.7158
rs4260678	A	G	A	G	0.0713	0.0780715	0.7649	0.7648	kidney cancer	0.1555	0.0549656	GCST90274799	5	33630839	0.016	8.34e-06	5_33630839_A_G	11786	Interleukin-13 levels	0.00168235	0.00182838	21.5851	41.8887	19.8582
rs4535095	T	C	T	C	0.0594	-0.00955421	0.5305	0.546	kidney cancer	0.8063	0.0389647	GCST90274799	2	98857893	0.0134	9.3e-06	2_98857893_T_C	11344	Interleukin-13 levels	0.00172951	0.00175761	19.97	41.8887	19.65
rs55924857	T	C	T	C	-0.0934	-0.0557241	0.8535	0.8671	kidney cancer	0.3063	0.0544704	GCST90274799	15	57830694	0.0183	3.33e-07	15_57830694_T_C	11792	Interleukin-13 levels	0.00220455	0.00218155	25.7767	41.8887	26.049
rs5756680	T	C	T	C	0.0848	-0.0463109	0.177	0.181	kidney cancer	0.3866	0.0534892	GCST90274799	22	37842933	0.0186	5.14e-06	22_37842933_T_C	9905	Interleukin-13 levels	0.00209454	0.00209505	20.7909	41.8887	20.7858
rs59235092	A	G	A	G	0.2122	-0.0483139	0.0274	0.02863	kidney cancer	0.7216	0.135591	GCST90274799	16	79977921	0.0439	1.34e-06	16_79977921_A_G	11784	Interleukin-13 levels	0.00197917	0.00239997	28.3445	41.8887	23.3648
rs74647203	A	G	A	G	-0.2845	0.152569	0.0136	0.01534	kidney cancer	0.4033	0.182555	GCST90274799	6	16610802	0.0629	6.1e-06	6_16610802_A_G	11792	Interleukin-13 levels	0.00173219	0.00217163	25.6593	41.8887	20.458
rs76219628	A	G	A	G	0.169	-0.0630687	0.0397	0.0317	kidney cancer	0.5382	0.102461	GCST90274799	7	154418309	0.0357	2.2e-06	7_154418309_A_G	11344	Interleukin-13 levels	0.00197192	0.00217771	24.7535	41.8887	22.4097
rs909357	A	G	A	G	-0.1099	-0.119293	0.0772	0.09202	kidney cancer	0.1183	0.0763745	GCST90274799	8	133902602	0.0247	8.61e-06	8_133902602_A_G	11777	Interleukin-13 levels	0.00167846	0.00172088	20.2983	41.8887	19.7971
rs9881117	A	G	A	G	-0.0656	-0.00440971	0.3094	0.3436	kidney cancer	0.9185	0.0430958	GCST90274799	3	123702960	0.0141	3.28e-06	3_123702960_A_G	11791	Interleukin-13 levels	0.00183272	0.00183901	21.7201	41.8887	21.6456
rs1004308	T	C	T	C	0.0727	0.00130085	0.1931	0.1963	kidney cancer	0.9821	0.0579798	GCST90274800	9	124977274	0.0162	7.2e-06	9_124977274_T_C	11783	Interleukin-15 receptor subunit alpha levels	0.00170653	0.00164703	19.4356	41.8887	20.139
rs117428573	A	C	A	C	-0.3132	-0.0819486	0.0119	0.01125	kidney cancer	0.6515	0.181431	GCST90274800	8	27696981	0.0684	4.67e-06	8_27696981_A_C	10857	Interleukin-15 receptor subunit alpha levels	0.00192781	0.00230686	25.0989	41.8887	20.9668
rs117484888	A	G	A	G	0.3794	0.0874115	0.0158	0.01125	kidney cancer	0.6609	0.199264	GCST90274800	21	15303777	0.0799	2.05e-06	21_15303777_A_G	7423	Interleukin-15 receptor subunit alpha levels	0.00302915	0.00447677	33.3715	41.8887	22.5476
rs12570881	A	T	A	T	-0.0867	-0.125336	0.8028	0.8344	kidney cancer	0.2322	0.104909	GCST90274800	10	5815194	0.0174	6.27e-07	10_5815194_A_T	11344	Interleukin-15 receptor subunit alpha levels	0.00218424	0.00238003	27.0587	41.8887	24.8279
rs140982443	T	C	T	C	0.1794	0.049171	0.963	0.96421	kidney cancer	0.7134	0.133874	GCST90274800	19	14884642	0.0395	5.58e-06	19_14884642_T_C	9906	Interleukin-15 receptor subunit alpha levels	0.00207844	0.00229352	22.7673	41.8887	20.6277
rs145793996	A	G	A	G	-0.2278	0.347977	0.9801	0.98466	kidney cancer	0.06875	0.19119	GCST90274800	11	37594094	0.0492	3.66e-06	11_37594094_A_G	11779	Interleukin-15 receptor subunit alpha levels	0.00181699	0.00202424	23.8878	41.8887	21.4377
rs17129907	A	G	A	G	-0.1381	0.186148	0.9503	0.94785	kidney cancer	0.331	0.19149	GCST90274800	11	97047987	0.0303	5.17e-06	11_97047987_A_G	11790	Interleukin-15 receptor subunit alpha levels	0.00175913	0.0018015	21.2744	41.8887	20.7731
rs17635883	A	G	A	G	0.0937	-0.0389322	0.122	0.1022	kidney cancer	0.5577	0.0664076	GCST90274800	7	51409710	0.0211	8.96e-06	7_51409710_A_G	11344	Interleukin-15 receptor subunit alpha levels	0.00173568	0.00188089	21.3733	41.8887	19.7203
rs192538756	A	T	A	T	0.1159	0.117338	0.8743	0.8609	kidney cancer	0.4936	0.171399	GCST90274800	20	2629394	0.0241	1.52e-06	20_2629394_A_T	9461	Interleukin-15 receptor subunit alpha levels	0.00243909	0.00295252	28.0106	41.8887	23.1277
rs2228059	T	G	T	G	0.3692	-0.00190181	0.5146	0.5399	kidney cancer	0.9601	0.0380148	GCST90274800	10	6002368	0.0127	8.39e-186	10_6002368_T_G	11344	Interleukin-15 receptor subunit alpha levels	0.069345	0.0680962	828.784	41.8887	845.115
rs2836464	A	G	A	G	0.0796	-0.0411419	0.8384	0.8681	kidney cancer	0.4206	0.0510838	GCST90274800	21	39896592	0.0169	2.48e-06	21_39896592_A_G	11791	Interleukin-15 receptor subunit alpha levels	0.00187827	0.00171692	20.2755	41.8887	22.1847
rs4459616	T	C	T	C	0.14	-0.0226417	0.0658	0.06339	kidney cancer	0.7818	0.0817467	GCST90274800	18	12175379	0.0294	1.92e-06	18_12175379_T_C	9899	Interleukin-15 receptor subunit alpha levels	0.00228593	0.00240964	23.9058	41.8887	22.6757
rs4772056	C	G	C	G	0.0894	0.132389	0.8608	0.8548	kidney cancer	0.02594	0.0594444	GCST90274800	13	98893318	0.0197	5.68e-06	13_98893318_C_G	11344	Interleukin-15 receptor subunit alpha levels	0.00181245	0.00191534	21.7655	41.8887	20.5941
rs56240706	A	T	A	T	0.0919	0.0268575	0.8082	0.8569	kidney cancer	0.6624	0.0615147	GCST90274800	4	20169693	0.0193	1.92e-06	4_20169693_A_T	8861	Interleukin-15 receptor subunit alpha levels	0.00255283	0.00261836	23.2569	41.8887	22.6734
rs62144964	A	G	A	G	0.0852	0.0672087	0.1223	0.135	kidney cancer	0.2442	0.0577121	GCST90274800	2	31652761	0.019	7.32e-06	2_31652761_A_G	11782	Interleukin-15 receptor subunit alpha levels	0.00170406	0.00155841	18.3867	41.8887	20.1081
rs649129	T	C	T	C	-0.0726	0.0131866	0.2166	0.2157	kidney cancer	0.7823	0.0477216	GCST90274800	9	136154304	0.0158	4.33e-06	9_136154304_T_C	10918	Interleukin-15 receptor subunit alpha levels	0.00193044	0.00178873	19.5608	41.8887	21.1134
rs6751509	T	C	T	C	0.0577	0.0209784	0.3704	0.3998	kidney cancer	0.6037	0.040414	GCST90274800	2	52233445	0.0128	6.55e-06	2_52233445_T_C	11782	Interleukin-15 receptor subunit alpha levels	0.00172202	0.00155281	18.3205	41.8887	20.3204
rs679874	A	G	A	G	0.0629	-0.0380662	0.7114	0.6953	kidney cancer	0.3798	0.0433425	GCST90274800	6	153065996	0.0139	6.03e-06	6_153065996_A_G	11779	Interleukin-15 receptor subunit alpha levels	0.00173573	0.00162458	19.1638	41.8887	20.4773
rs6845172	C	G	C	G	0.0778	0.0917584	0.8203	0.8211	kidney cancer	0.07933	0.0522963	GCST90274800	4	140657353	0.0162	1.57e-06	4_140657353_C_G	11772	Interleukin-15 receptor subunit alpha levels	0.0019557	0.00178447	21.0408	41.8887	23.0637
rs7137828	T	C	T	C	-0.0748	0.0330399	0.5243	0.5337	kidney cancer	0.3962	0.0389425	GCST90274800	12	111932800	0.0133	1.87e-08	12_111932800_T_C	11344	Interleukin-15 receptor subunit alpha levels	0.002781	0.00279091	31.7431	41.8887	31.6301
rs7898286	T	G	T	G	-0.1967	0.0323166	0.3975	0.4018	kidney cancer	0.4121	0.0394007	GCST90274800	10	6009462	0.0135	4.34e-48	10_6009462_T_G	11344	Interleukin-15 receptor subunit alpha levels	0.0183737	0.0185325	214.164	41.8887	212.296
rs79638163	T	G	T	G	0.176	-0.0523465	0.9701	0.97137	kidney cancer	0.6313	0.109078	GCST90274800	1	235799305	0.0398	9.77e-06	1_235799305_T_G	11792	Interleukin-15 receptor subunit alpha levels	0.00165587	0.00179698	21.2245	41.8887	19.5551
rs9270551	A	G	A	G	0.0749	-0.234914	0.7077	0.7157	kidney cancer	0.007192	0.0873994	GCST90274800	6	32560501	0.0153	9.81e-07	6_32560501_A_G	11344	Interleukin-15 receptor subunit alpha levels	0.0021085	0.00232098	26.3858	41.8887	23.9652
rs115193412	T	C	T	C	0.1688	-0.0449734	0.0418	0.03783	kidney cancer	0.6931	0.113957	GCST90274801	3	63484616	0.0349	1.32e-06	3_63484616_T_C	11778	Interleukin-17A levels	0.0019826	0.00228248	26.94	41.8887	23.3934
rs12599620	T	C	T	C	-0.0726	-0.0915672	0.7391	0.7178	kidney cancer	0.03972	0.0445225	GCST90274801	16	8011846	0.0153	2.08e-06	16_8011846_T_C	11336	Interleukin-17A levels	0.00198265	0.00203273	23.0859	41.8887	22.516
rs13092332	T	C	T	C	0.1668	0.187053	0.0383	0.03067	kidney cancer	0.08072	0.1071	GCST90274801	3	163713211	0.0373	7.75e-06	3_163713211_T_C	11776	Interleukin-17A levels	0.00169556	0.00204956	24.1811	41.8887	19.9974
rs1462017	C	G	C	G	-0.0893	0.0151136	0.1776	0.1984	kidney cancer	0.7601	0.0494962	GCST90274801	8	70106392	0.017	1.5e-07	8_70106392_C_G	11774	Interleukin-17A levels	0.0023385	0.00232948	27.4867	41.8887	27.5934
rs17448036	A	G	A	G	-0.0585	0.0225524	0.5609	0.5849	kidney cancer	0.566	0.0392932	GCST90274801	3	189579511	0.0128	4.87e-06	3_189579511_A_G	11783	Interleukin-17A levels	0.00176987	0.00168574	19.8932	41.8887	20.8878
rs2429911	T	C	T	C	0.2309	-0.548527	0.0251	0.02761	kidney cancer	0.00256	0.181863	GCST90274801	17	2272057	0.0486	2.02e-06	17_2272057_T_C	11294	Interleukin-17A levels	0.00199497	0.00260923	29.5405	41.8887	22.5723
rs28852438	A	G	A	G	-0.068	-0.0804734	0.2897	0.2812	kidney cancer	0.06994	0.044404	GCST90274801	7	6380998	0.0148	4.34e-06	7_6380998_A_G	11336	Interleukin-17A levels	0.0018591	0.001903	21.6097	41.8887	21.1103
rs33998516	A	C	A	C	-0.0802	-0.0118702	0.7781	0.7699	kidney cancer	0.8052	0.0481308	GCST90274801	1	96622380	0.0164	1.01e-06	1_96622380_A_C	11336	Interleukin-17A levels	0.00210553	0.00222112	25.2302	41.8887	23.9145
rs34026684	T	G	T	G	-0.0957	-0.00349389	0.8181		kidney cancer	0.9731	0.103613	GCST90274801	7	154454180	0.0216	9.4e-06	7_154454180_T_G	8587	Interleukin-17A levels	0.00228131	0.00272579	23.4649	41.8887	19.6298
rs34557923	T	G	T	G	0.2446	0.00876151	0.9819	0.98773	kidney cancer	0.9552	0.15596	GCST90274801	10	67955765	0.0517	2.23e-06	10_67955765_T_G	10913	Interleukin-17A levels	0.00204728	0.00212661	23.2529	41.8887	22.3837
rs3895928	T	C	T	C	-0.1893	0.0468836	0.9682	0.96421	kidney cancer	0.702	0.122532	GCST90274801	12	89686567	0.0418	5.93e-06	12_89686567_T_C	11783	Interleukin-17A levels	0.00173785	0.0022066	26.0534	41.8887	20.5092
rs41270871	A	T	A	T	0.0923	-0.0309171	0.221	0.2219	kidney cancer	0.5699	0.0544125	GCST90274801	6	32628224	0.0189	1.04e-06	6_32628224_A_T	8742	Interleukin-17A levels	0.00272135	0.00293334	25.7129	41.8887	23.8495
rs4877075	A	G	A	G	0.0908	-0.00329457	0.1411	0.1227	kidney cancer	0.9537	0.0567432	GCST90274801	9	91976386	0.0192	2.25e-06	9_91976386_A_G	11336	Interleukin-17A levels	0.00196938	0.00199835	22.6946	41.8887	22.365
rs4985487	T	G	T	G	-0.0615	0.0142973	0.6045	0.5941	kidney cancer	0.7218	0.0401549	GCST90274801	16	70109850	0.0138	8.33e-06	16_70109850_T_G	11336	Interleukin-17A levels	0.00174924	0.00180852	20.5349	41.8887	19.8606
rs56702825	A	G	A	G	0.1383	-0.0599623	0.9451	0.9407	kidney cancer	0.51	0.0910123	GCST90274801	8	504034	0.0303	5.01e-06	8_504034_A_G	11766	Interleukin-17A levels	0.00176781	0.00198483	23.396	41.8887	20.8333
rs57876893	T	G	T	G	0.1915	-0.200243	0.0279	0.02045	kidney cancer	0.2057	0.158235	GCST90274801	14	23580861	0.043	8.45e-06	14_23580861_T_G	11776	Interleukin-17A levels	0.00168169	0.00198922	23.4678	41.8887	19.8336
rs75788494	T	C	T	C	-0.2432	0.0706371	0.021	0.02045	kidney cancer	0.5971	0.133637	GCST90274801	2	13468626	0.0525	3.61e-06	2_13468626_T_C	10574	Interleukin-17A levels	0.00202568	0.00243197	25.7735	41.8887	21.459
rs77529534	T	C	T	C	-0.1279	-0.0706371	0.9323	0.92127	kidney cancer	0.3976	0.0835037	GCST90274801	9	27215497	0.0272	2.57e-06	9_27215497_T_C	11775	Interleukin-17A levels	0.00187457	0.00206498	24.3613	41.8887	22.1107
rs77595989	T	G	T	G	0.1696	0.0264472	0.9648	0.97239	kidney cancer	0.8188	0.115445	GCST90274801	12	118130693	0.0371	4.84e-06	12_118130693_T_G	11767	Interleukin-17A levels	0.00177313	0.00195372	23.0305	41.8887	20.898
rs79982350	C	G	C	G	-0.1467	0.0651787	0.0555	0.06646	kidney cancer	0.4704	0.0902967	GCST90274801	9	31560030	0.0295	6.6e-07	9_31560030_C_G	11336	Interleukin-17A levels	0.00217714	0.00225624	25.63	41.8887	24.7295
rs1072074	A	G	A	G	-0.0649	0.125839	0.5847	0.6207	kidney cancer	0.1392	0.0850969	GCST90274802	4	24758319	0.0141	4.17e-06	4_24758319_A_G	11785	Interleukin-17C levels	0.0017948	0.00204557	24.1524	41.8887	21.1861
rs10870773	A	G	A	G	-0.0816	0.0864297	0.8025	0.7883	kidney cancer	0.1088	0.053897	GCST90274802	13	44396409	0.0171	1.82e-06	13_44396409_A_G	11345	Interleukin-17C levels	0.0020035	0.00211068	23.9921	41.8887	22.7713
rs113334480	T	C	T	C	-0.0962	-0.110485	0.8992	0.91411	kidney cancer	0.08778	0.0647159	GCST90274802	3	184205438	0.0217	9.29e-06	3_184205438_T_C	11788	Interleukin-17C levels	0.00166472	0.00167763	19.8058	41.8887	19.6531
rs113702571	T	C	T	C	-0.2558	-0.0981642	0.9848	0.98875	kidney cancer	0.539	0.159792	GCST90274802	8	118629302	0.0564	5.75e-06	8_118629302_T_C	11786	Interleukin-17C levels	0.00174258	0.00195895	23.1295	41.8887	20.5704
rs114882743	A	T	A	T	-0.3259	-0.00732677	0.9804	0.98262	kidney cancer	0.9629	0.157515	GCST90274802	1	176930254	0.0548	2.73e-09	1_176930254_A_T	11345	Interleukin-17C levels	0.00310833	0.00408186	46.4903	41.8887	35.3678
rs11931996	T	C	T	C	-0.1219	0.223224	0.9068	0.9274	kidney cancer	0.1811	0.166912	GCST90274802	4	152291909	0.0262	3.28e-06	4_152291909_T_C	11345	Interleukin-17C levels	0.0019048	0.00251168	28.5618	41.8887	21.6474
rs12092228	T	G	T	G	0.1508	0.00793137	0.0512	0.03988	kidney cancer	0.9299	0.0901593	GCST90274802	1	242536005	0.0327	4e-06	1_242536005_T_G	9892	Interleukin-17C levels	0.00214574	0.00220942	21.8995	41.8887	21.267
rs12445031	C	G	C	G	-0.09	0.061769	0.1382	0.1513	kidney cancer	0.2512	0.0538321	GCST90274802	16	76626873	0.0195	3.92e-06	16_76626873_C_G	11339	Interleukin-17C levels	0.00187544	0.00192943	21.9163	41.8887	21.3018
rs12863903	T	C	T	C	-0.0857	0.100926	0.1597	0.181	kidney cancer	0.04899	0.0512658	GCST90274802	13	96638651	0.018	1.93e-06	13_96638651_T_C	11345	Interleukin-17C levels	0.00199444	0.0019712	22.4035	41.8887	22.6682
rs12895022	T	C	T	C	0.1091	0.039989	0.0906	0.08896	kidney cancer	0.5587	0.0683838	GCST90274802	14	102333234	0.0236	3.78e-06	14_102333234_T_C	11774	Interleukin-17C levels	0.00181212	0.00196138	23.1348	41.8887	21.371
rs139152046	T	G	T	G	-0.2421	-0.0683126	0.0211	0.01943	kidney cancer	0.6016	0.130842	GCST90274802	12	23245149	0.0536	6.28e-06	12_23245149_T_G	9422	Interleukin-17C levels	0.00216107	0.00242125	22.8636	41.8887	20.4014
rs139637682	T	C	T	C	-0.3301	-0.0888312	0.9817	0.9816	kidney cancer	0.6287	0.183704	GCST90274802	2	111999407	0.0737	7.5e-06	2_111999407_T_C	8488	Interleukin-17C levels	0.00235846	0.00391517	33.3547	41.8887	20.0612
rs149756404	A	C	A	C	-0.2749	-0.123298	0.9809	0.97239	kidney cancer	0.3372	0.128474	GCST90274802	2	239715033	0.0524	1.55e-07	2_239715033_A_C	11302	Interleukin-17C levels	0.0024297	0.00283164	32.0884	41.8887	27.5224
rs17700884	T	G	T	G	-0.105	-0.0556239	0.3783	0.3517	kidney cancer	0.2345	0.0467881	GCST90274802	16	88684495	0.0136	1.16e-14	16_88684495_T_G	11775	Interleukin-17C levels	0.00503756	0.00518592	61.3721	41.8887	59.6075
rs1920106	T	C	T	C	0.0633	0.0187236	0.3948	0.3855	kidney cancer	0.6375	0.0397363	GCST90274802	7	21240100	0.0132	1.62e-06	7_21240100_T_C	11792	Interleukin-17C levels	0.0019467	0.00191476	22.6183	41.8887	22.9964
rs2584966	T	C	T	C	0.0625	-0.0741794	0.4639	0.4724	kidney cancer	0.05771	0.0390851	GCST90274802	2	117363487	0.0139	6.91e-06	2_117363487_T_C	9906	Interleukin-17C levels	0.0020372	0.00194294	19.2804	41.8887	20.2176
rs2770113	A	G	A	G	0.0604	0.0247026	0.4998	0.499	kidney cancer	0.5309	0.0394212	GCST90274802	6	158194819	0.0135	7.67e-06	6_158194819_A_G	11345	Interleukin-17C levels	0.00176162	0.00182408	20.7283	41.8887	20.0173
rs2814092	C	G	C	G	0.0624	0.0710175	0.6437	0.6309	kidney cancer	0.08447	0.0411619	GCST90274802	6	66547346	0.0135	3.8e-06	6_66547346_C_G	11792	Interleukin-17C levels	0.00180885	0.00178607	21.0954	41.8887	21.3649
rs28552890	A	T	A	T	-0.096	0.000299955	0.8859	0.8865	kidney cancer	0.9966	0.0703908	GCST90274802	8	23691952	0.0215	8e-06	8_23691952_A_T	11345	Interleukin-17C levels	0.00175459	0.00186313	21.1729	41.8887	19.9373
rs39779	C	G	C	G	0.1077	-0.0147901	0.1032	0.1115	kidney cancer	0.8325	0.0699307	GCST90274802	16	8393906	0.0227	2.09e-06	16_8393906_C_G	11345	Interleukin-17C levels	0.00198057	0.00214702	24.4061	41.8887	22.5102
rs541607428	A	G	A	G	0.3402	-0.435283	0.0121	0.01431	kidney cancer	0.09659	0.261964	GCST90274802	1	86710244	0.0755	6.61e-06	1_86710244_A_G	7902	Interleukin-17C levels	0.0025635	0.00276692	21.9193	41.8887	20.3037
rs554604740	A	G	A	G	0.1926	-0.0293646	0.0286	0.02147	kidney cancer	0.8321	0.138506	GCST90274802	12	52750252	0.0401	1.56e-06	12_52750252_A_G	11149	Interleukin-17C levels	0.00206523	0.00206114	23.0229	41.8887	23.0687
rs59356989	A	G	A	G	-0.0882	0.0384512	0.8432	0.8579	kidney cancer	0.4775	0.0541315	GCST90274802	5	107423766	0.0177	6.26e-07	5_107423766_A_G	11790	Interleukin-17C levels	0.00210202	0.00205704	24.2984	41.8887	24.8308
rs6874610	T	G	T	G	-0.0649	-0.005286	0.2795	0.2965	kidney cancer	0.9011	0.0425358	GCST90274802	5	39436460	0.0144	6.58e-06	5_39436460_T_G	11783	Interleukin-17C levels	0.00172121	0.00169643	20.0196	41.8887	20.3125
rs72815428	T	C	T	C	-0.1673	0.11586	0.0423	0.04294	kidney cancer	0.225	0.0954884	GCST90274802	5	174836306	0.0366	4.85e-06	5_174836306_T_C	11775	Interleukin-17C levels	0.00177163	0.00226773	26.7587	41.8887	20.8944
rs73181003	A	G	A	G	-0.1122	-0.0188218	0.093	0.08487	kidney cancer	0.7932	0.0717956	GCST90274802	22	46922217	0.0246	5.09e-06	22_46922217_A_G	11345	Interleukin-17C levels	0.00183059	0.00212376	24.1411	41.8887	20.8025
rs7324443	C	G	C	G	0.0637	-0.0111621	0.3575	0.3446	kidney cancer	0.7842	0.0407598	GCST90274802	13	30065064	0.014	5.36e-06	13_30065064_C_G	11345	Interleukin-17C levels	0.00182181	0.00186405	21.1834	41.8887	20.7025
rs75246422	T	C	T	C	-0.0951	-0.0161686	0.1233	0.09611	kidney cancer	0.7927	0.0615228	GCST90274802	5	174179760	0.0201	2.23e-06	5_174179760_T_C	11793	Interleukin-17C levels	0.00189494	0.00195526	23.0997	41.8887	22.3856
rs75360344	A	G	A	G	-0.1414	-0.0170538	0.0498	0.04908	kidney cancer	0.8576	0.095044	GCST90274802	7	35414652	0.031	5.08e-06	7_35414652_A_G	11774	Interleukin-17C levels	0.00176424	0.00189223	22.3175	41.8887	20.8054
rs7559734	T	C	T	C	-0.0915	0.0146062	0.8803	0.91513	kidney cancer	0.8149	0.0623903	GCST90274802	2	212465664	0.0206	8.92e-06	2_212465664_T_C	11345	Interleukin-17C levels	0.0017363	0.0017644	20.049	41.8887	19.7291
rs77223587	T	G	T	G	-0.3175	-0.310746	0.9893	0.98773	kidney cancer	0.3691	0.345981	GCST90274802	15	46123423	0.0705	6.68e-06	15_46123423_T_G	10324	Interleukin-17C levels	0.00196107	0.00213417	22.076	41.8887	20.2819
rs77654242	T	G	T	G	-0.2174	0.00249688	0.9707	0.9683	kidney cancer	0.9857	0.139309	GCST90274802	2	136675328	0.0469	3.56e-06	2_136675328_T_G	10294	Interleukin-17C levels	0.00208338	0.00268845	27.7441	41.8887	21.4869
rs78289993	A	G	A	G	0.1577	-0.0793679	0.961	0.96421	kidney cancer	0.428	0.100134	GCST90274802	8	14156196	0.0351	7.03e-06	8_14156196_A_G	11785	Interleukin-17C levels	0.00171021	0.00186415	22.0063	41.8887	20.1859
rs79340054	T	C	T	C	0.138	0.0351741	0.9508	0.94479	kidney cancer	0.7173	0.0971473	GCST90274802	10	19368604	0.0309	7.97e-06	10_19368604_T_C	11780	Interleukin-17C levels	0.00169058	0.00178173	21.0227	41.8887	19.9453
rs79599491	T	C	T	C	-0.1905	-0.0306654	0.9711	0.97751	kidney cancer	0.7852	0.112513	GCST90274802	15	42484321	0.0419	5.45e-06	15_42484321_T_C	11306	Interleukin-17C levels	0.00182531	0.00203696	23.0728	41.8887	20.671
rs8015296	C	G	C	G	-0.1162	0.0573114	0.0991	0.1043	kidney cancer	0.6583	0.129587	GCST90274802	14	92763907	0.0253	4.37e-06	14_92763907_C_G	9461	Interleukin-17C levels	0.00222515	0.00241097	22.8605	41.8887	21.0946
rs112338272	A	C	A	C	-0.1954	-0.00677698	0.0236	0.02761	kidney cancer	0.9578	0.128074	GCST90274803	9	20069041	0.0425	4.27e-06	9_20069041_A_C	14721	Interleukin-18 levels	0.00143407	0.00175962	25.9455	41.8887	21.1384
rs113552426	C	G	C	G	-0.278	-0.147109	0.9792	0.98364	kidney cancer	0.4406	0.190758	GCST90274803	16	84730435	0.0581	1.71e-06	16_84730435_C_G	11249	Interleukin-18 levels	0.0020315	0.00314814	35.519	41.8887	22.8948
rs113841145	A	G	A	G	0.2866	0.0577027	0.9893	0.990798	kidney cancer	0.7999	0.227645	GCST90274803	11	116331456	0.0629	5.2e-06	11_116331456_A_G	13809	Interleukin-18 levels	0.00150141	0.00173898	24.0519	41.8887	20.7611
rs115120333	T	C	T	C	-0.1967	0.0385474	0.9795	0.98671	kidney cancer	0.7906	0.145171	GCST90274803	1	78975194	0.0443	8.99e-06	1_78975194_T_C	14743	Interleukin-18 levels	0.00133565	0.00155381	22.9403	41.8887	19.7152
rs11605127	C	G	C	G	-0.0629	-0.0257281	0.7543	0.7515	kidney cancer	0.5717	0.0454923	GCST90274803	11	268430	0.0137	4.41e-06	11_268430_C_G	14730	Interleukin-18 levels	0.00142921	0.00146649	21.6303	41.8887	21.0795
rs11918804	A	C	A	C	-0.1184	0.101473	0.9337	0.94376	kidney cancer	0.2236	0.0833788	GCST90274803	3	196038580	0.0266	8.54e-06	3_196038580_A_C	11791	Interleukin-18 levels	0.00167778	0.00173562	20.4968	41.8887	19.8125
rs12201187	A	T	A	T	0.0676	-0.0130149	0.2767	0.2597	kidney cancer	0.7746	0.0454491	GCST90274803	6	162785078	0.0138	9.65e-07	6_162785078_A_T	13245	Interleukin-18 levels	0.00180868	0.00182916	24.2679	41.8887	23.9958
rs12648080	A	G	A	G	0.072	0.0392607	0.8077	0.8047	kidney cancer	0.4316	0.049921	GCST90274803	4	121893301	0.0146	8.16e-07	4_121893301_A_G	14743	Interleukin-18 levels	0.00164709	0.00161037	23.7767	41.8887	24.3198
rs12681624	C	G	C	G	-0.0935	-0.0553013	0.8179	0.8466	kidney cancer	0.3588	0.0602638	GCST90274803	8	144606172	0.0157	2.59e-09	8_144606172_C_G	13657	Interleukin-18 levels	0.00259063	0.00260413	35.6523	41.8887	35.467
rs12711729	T	C	T	C	-0.0702	0.0582649	0.7336	0.7434	kidney cancer	0.2096	0.0464386	GCST90274803	2	126751021	0.0153	4.47e-06	2_126751021_T_C	11345	Interleukin-18 levels	0.0018525	0.00192618	21.8909	41.8887	21.0519
rs139760701	A	T	A	T	-0.3049	-0.0589011	0.989	0.98466	kidney cancer	0.7324	0.172258	GCST90274803	3	115001900	0.0604	4.46e-07	3_115001900_A_T	13809	Interleukin-18 levels	0.00184222	0.00202271	27.9842	41.8887	25.4824
rs1403742	A	T	A	T	-0.0567	-0.0336282	0.371	0.3528	kidney cancer	0.4122	0.0410086	GCST90274803	20	51289816	0.0124	4.82e-06	20_51289816_A_T	14296	Interleukin-18 levels	0.00146061	0.00150045	21.4796	41.8887	20.9085
rs144626837	T	C	T	C	0.2026	0.0280042	0.9792	0.98773	kidney cancer	0.8357	0.135027	GCST90274803	2	125030834	0.0458	9.71e-06	2_125030834_T_C	14741	Interleukin-18 levels	0.00132588	0.00167203	24.6853	41.8887	19.5681
rs148504635	A	C	A	C	0.2532	0.160587	0.9857	0.98364	kidney cancer	0.4438	0.209701	GCST90274803	16	54161464	0.0525	1.42e-06	16_54161464_A_C	14737	Interleukin-18 levels	0.00157606	0.00180733	26.6793	41.8887	23.26
rs17229943	A	C	A	C	-0.16	0.121155	0.9351	0.9499	kidney cancer	0.2176	0.0982656	GCST90274803	5	68682536	0.0267	2.07e-09	5_68682536_A_C	14744	Interleukin-18 levels	0.00242999	0.00310722	45.9495	41.8887	35.9102
rs2108621	T	C	T	C	0.0581	0.016841	0.3565	0.3364	kidney cancer	0.7168	0.0464274	GCST90274803	19	5344989	0.0126	4.01e-06	19_5344989_T_C	14296	Interleukin-18 levels	0.00148529	0.00154878	22.1726	41.8887	21.2623
rs35495214	T	C	T	C	0.1374	-0.0939456	0.0465	0.03681	kidney cancer	0.3218	0.0948212	GCST90274803	11	112433719	0.0291	2.34e-06	11_112433719_T_C	14735	Interleukin-18 levels	0.00151091	0.00167408	24.7056	41.8887	22.294
rs35656694	A	C	A	C	0.0746	0.00846408	0.851	0.8517	kidney cancer	0.8776	0.0549571	GCST90274803	16	52032393	0.0165	6.15e-06	16_52032393_A_C	14744	Interleukin-18 levels	0.00138469	0.00141131	20.835	41.8887	20.4414
rs385076	T	C	T	C	-0.1857	-0.0323166	0.3734	0.3497	kidney cancer	0.4329	0.0412076	GCST90274803	2	32489851	0.0123	1.68e-51	2_32489851_T_C	14296	Interleukin-18 levels	0.015696	0.0161368	234.443	41.8887	227.936
rs4140444	A	G	A	G	0.2157	0.139032	0.0204	0.0184	kidney cancer	0.3859	0.160346	GCST90274803	6	38300402	0.0461	2.88e-06	6_38300402_A_G	14741	Interleukin-18 levels	0.00148315	0.00185956	27.4591	41.8887	21.8927
rs4612182	A	G	A	G	-0.0547	-0.0219389	0.5914	0.6319	kidney cancer	0.5846	0.0401313	GCST90274803	6	138336137	0.0123	8.7e-06	6_138336137_A_G	14743	Interleukin-18 levels	0.00133985	0.00144605	21.3471	41.8887	19.7772
rs56266057	T	G	T	G	0.0796	0.0353671	0.8662	0.8875	kidney cancer	0.5287	0.0561391	GCST90274803	10	17082153	0.018	9.77e-06	10_17082153_T_G	14295	Interleukin-18 levels	0.00136636	0.00146869	21.0229	41.8887	19.556
rs56836641	T	C	T	C	-0.163	-0.0950374	0.0477	0.03374	kidney cancer	0.3835	0.109055	GCST90274803	7	155637974	0.0301	6.12e-08	7_155637974_T_C	14743	Interleukin-18 levels	0.00198542	0.00241378	35.6676	41.8887	29.3253
rs5744249	A	C	A	C	0.2039	0.0256677	0.7618	0.7791	kidney cancer	0.5681	0.0449639	GCST90274803	11	112025306	0.0135	1.53e-51	11_112025306_A_C	14742	Interleukin-18 levels	0.0152405	0.0150885	225.812	41.8887	228.122
rs57954386	C	G	C	G	-0.1248	0.0389487	0.0665	0.05317	kidney cancer	0.6469	0.0850274	GCST90274803	11	86686181	0.0259	1.45e-06	11_86686181_C_G	12201	Interleukin-18 levels	0.00189968	0.00193373	23.6352	41.8887	23.2183
rs60235102	T	C	T	C	0.1154	-0.0677437	0.9237	0.92843	kidney cancer	0.3698	0.0755353	GCST90274803	11	105060888	0.0225	2.91e-07	11_105060888_T_C	14722	Interleukin-18 levels	0.00178387	0.00187714	27.6835	41.8887	26.3055
rs62351325	T	C	T	C	0.1557	-0.181162	0.9627	0.97137	kidney cancer	0.04772	0.0915028	GCST90274803	5	19698240	0.0344	6.01e-06	5_19698240_T_C	14744	Interleukin-18 levels	0.00138772	0.00174103	25.7111	41.8887	20.4861
rs67424072	T	G	T	G	-0.082	0.0464064	0.8341	0.8374	kidney cancer	0.3787	0.0527169	GCST90274803	7	11104167	0.0165	6.71e-07	7_11104167_T_G	14296	Interleukin-18 levels	0.00172487	0.0018609	26.6492	41.8887	24.6979
rs72766437	T	C	T	C	0.0637	-0.0227395	0.2088	0.1748	kidney cancer	0.6402	0.048649	GCST90274803	5	83710370	0.0143	8.41e-06	5_83710370_T_C	14734	Interleukin-18 levels	0.00134512	0.00134068	19.7774	41.8887	19.843
rs77994606	A	G	A	G	-0.2314	0.0938546	0.9814	0.97853	kidney cancer	0.5607	0.161317	GCST90274803	18	28763724	0.0472	9.46e-07	18_28763724_A_G	14743	Interleukin-18 levels	0.00162783	0.00195486	28.873	41.8887	24.0349
rs7990672	T	G	T	G	-0.0568	0.0626204	0.69	0.6575	kidney cancer	0.1388	0.0423032	GCST90274803	13	90838056	0.0128	9.1e-06	13_90838056_T_G	14295	Interleukin-18 levels	0.0013758	0.00138018	19.7543	41.8887	19.6914
rs10171395	A	C	A	C	0.0912	0.0115666	0.1155	0.09202	kidney cancer	0.864	0.0675288	GCST90274804	2	104750692	0.019	1.59e-06	2_104750692_A_C	14295	interleukin-18 receptor 1 levels	0.00160938	0.00169941	24.3311	41.8887	23.04
rs117195704	A	G	A	G	-0.1505	-0.00737275	0.0389	0.03374	kidney cancer	0.9423	0.101863	GCST90274804	10	61379709	0.0313	1.52e-06	10_61379709_A_G	14730	interleukin-18 receptor 1 levels	0.00156733	0.00169364	24.9863	41.8887	23.1198
rs117524772	A	C	A	C	0.2911	0.100484	0.0232	0.03374	kidney cancer	0.387	0.116156	GCST90274804	17	64361924	0.0451	1.09e-10	17_64361924_A_C	14295	interleukin-18 receptor 1 levels	0.00290632	0.00384068	55.1065	41.8887	41.6612
rs1812326	T	C	T	C	0.2401	-0.0632565	0.3831	0.362	kidney cancer	0.1214	0.040839	GCST90274804	2	102860411	0.0117	1.39e-93	2_102860411_T_C	14737	interleukin-18 receptor 1 levels	0.0277859	0.0272484	412.752	41.8887	421.127
rs35021151	A	G	A	G	-0.1646	0.0648586	0.0317	0.02556	kidney cancer	0.5491	0.108258	GCST90274804	3	58414784	0.0342	1.49e-06	3_58414784_A_G	14735	interleukin-18 receptor 1 levels	0.00156976	0.00166325	24.5456	41.8887	23.1637
rs35679975	T	C	T	C	0.0726	-0.0453112	0.8161	0.8088	kidney cancer	0.3548	0.0489682	GCST90274804	20	51194941	0.0149	1.1e-06	20_51194941_T_C	14726	interleukin-18 receptor 1 levels	0.00160981	0.00158208	23.3315	41.8887	23.7411
rs62257659	A	G	A	G	-0.2015	-0.127833	0.9745	0.98978	kidney cancer	0.2553	0.112374	GCST90274804	3	79589418	0.042	1.61e-06	3_79589418_A_G	14727	interleukin-18 receptor 1 levels	0.00156069	0.00201791	29.7738	41.8887	23.0171
rs7149605	A	G	A	G	0.1075	0.0407178	0.0957	0.08384	kidney cancer	0.5465	0.067524	GCST90274804	14	94854041	0.0203	1.19e-07	14_94854041_A_G	14731	interleukin-18 receptor 1 levels	0.00190032	0.00200019	29.5199	41.8887	28.043
rs78199195	A	G	A	G	-0.0956	0.0721346	0.8928	0.8937	kidney cancer	0.2683	0.0651631	GCST90274804	3	146882115	0.0196	1.07e-06	3_146882115_A_G	14295	interleukin-18 receptor 1 levels	0.00166172	0.00174942	25.0483	41.8887	23.7905
rs10057700	A	G	A	G	-0.0822	-0.370484	0.4388	0.4131	kidney cancer	0.1363	0.248695	GCST90274805	5	161958436	0.0181	5.59e-06	5_161958436_A_G	8587	Interleukin-1-alpha levels	0.00239665	0.00332781	28.6646	41.8887	20.6246
rs10063171	T	G	T	G	0.0775	0.0192848	0.1932	0.1973	kidney cancer	0.6998	0.0500136	GCST90274805	5	67352803	0.0175	9.49e-06	5_67352803_T_G	11340	Interleukin-1-alpha levels	0.00172679	0.00187243	21.2695	41.8887	19.6122
rs10233998	T	G	T	G	0.131	-0.0377774	0.0604	0.07669	kidney cancer	0.6442	0.0817985	GCST90274805	7	89060931	0.0286	4.64e-06	7_89060931_T_G	11785	Interleukin-1-alpha levels	0.00177739	0.00194784	22.9962	41.8887	20.9802
rs115494443	A	G	A	G	0.2658	0.182722	0.0186	0.01227	kidney cancer	0.2953	0.174592	GCST90274805	1	116784131	0.0565	2.55e-06	1_116784131_A_G	10853	Interleukin-1-alpha levels	0.00203544	0.00257928	28.0602	41.8887	22.1316
rs115602471	T	C	T	C	0.2215	0.100373	0.0311	0.02658	kidney cancer	0.4159	0.123376	GCST90274805	2	170964850	0.0469	2.33e-06	2_170964850_T_C	11340	Interleukin-1-alpha levels	0.00196341	0.00295677	33.6232	41.8887	22.305
rs117537822	T	C	T	C	0.2176	0.169574	0.9755	0.98466	kidney cancer	0.2387	0.143921	GCST90274805	17	32073614	0.0439	7.17e-07	17_32073614_T_C	11788	Interleukin-1-alpha levels	0.00208026	0.00226329	26.7357	41.8887	24.5691
rs11759846	A	G	A	G	-0.3263	-0.00786896	0.0799	0.05215	kidney cancer	0.9304	0.0900941	GCST90274805	6	32586222	0.0266	1.36e-34	6_32586222_A_G	11788	Interleukin-1-alpha levels	0.0126065	0.0156547	187.441	41.8887	150.477
rs11878153	A	G	A	G	0.1116	-0.0476159	0.9015	0.91309	kidney cancer	0.4818	0.0676928	GCST90274805	18	308555	0.0221	4.42e-07	18_308555_A_G	11787	Interleukin-1-alpha levels	0.00215911	0.00221187	26.1247	41.8887	25.5002
rs12047801	T	C	T	C	0.0783	-0.0106432	0.174	0.1687	kidney cancer	0.8374	0.0518621	GCST90274805	1	105113404	0.0171	4.67e-06	1_105113404_T_C	11785	Interleukin-1-alpha levels	0.00177625	0.00176231	20.802	41.8887	20.9668
rs12529944	T	C	T	C	-0.0845	-0.0613773	0.178	0.1595	kidney cancer	0.5618	0.105792	GCST90274805	6	84066908	0.0189	7.79e-06	6_84066908_T_C	11340	Interleukin-1-alpha levels	0.0017599	0.00208947	23.74	41.8887	19.9889
rs16886503	A	T	A	T	0.2438	0.0518331	0.9824	0.97955	kidney cancer	0.7379	0.154894	GCST90274805	8	89744017	0.0524	3.28e-06	8_89744017_A_T	11786	Interleukin-1-alpha levels	0.00183364	0.00205541	24.2708	41.8887	21.6474
rs190042298	A	G	A	G	0.1502	-0.0691529	0.0497	0.04703	kidney cancer	0.4891	0.0999693	GCST90274805	3	147628690	0.0339	9.39e-06	3_147628690_A_G	9897	Interleukin-1-alpha levels	0.00197999	0.00213102	21.1314	41.8887	19.6309
rs2426634	A	G	A	G	-0.0896	-0.031111	0.1376	0.1534	kidney cancer	0.577	0.0557773	GCST90274805	20	55282711	0.0198	6.03e-06	20_55282711_A_G	11787	Interleukin-1-alpha levels	0.00173461	0.00190534	22.4973	41.8887	20.4779
rs4767214	T	C	T	C	0.062	-0.00642057	0.5326	0.5194	kidney cancer	0.869	0.0389293	GCST90274805	12	114539621	0.013	1.85e-06	12_114539621_T_C	11772	Interleukin-1-alpha levels	0.00192878	0.00191383	22.569	41.8887	22.7456
rs523604	A	G	A	G	0.0754	0.0555293	0.5264	0.5031	kidney cancer	0.2163	0.0449111	GCST90274805	11	118755738	0.0142	1.1e-07	11_118755738_A_G	10290	Interleukin-1-alpha levels	0.00273304	0.00283466	29.2458	41.8887	28.1946
rs61098036	A	G	A	G	-0.0856	0.0106432	0.8232	0.8589	kidney cancer	0.9206	0.106775	GCST90274805	17	53509585	0.0187	4.7e-06	17_53509585_A_G	9891	Interleukin-1-alpha levels	0.00211443	0.00213287	21.1371	41.8887	20.9539
rs7138836	A	T	A	T	-0.0982	0.0671018	0.1141	0.09305	kidney cancer	0.2914	0.0636003	GCST90274805	12	103893601	0.0207	2.1e-06	12_103893601_A_T	11775	Interleukin-1-alpha levels	0.00190795	0.0019495	22.9963	41.8887	22.5052
rs72937918	T	C	T	C	-0.2056	-0.00767051	0.0233	0.02045	kidney cancer	0.9543	0.133847	GCST90274805	11	80672314	0.0452	5.4e-06	11_80672314_T_C	11772	Interleukin-1-alpha levels	0.00175481	0.00192395	22.6885	41.8887	20.6904
rs76012752	A	G	A	G	0.1568	-0.174472	0.9527	0.95603	kidney cancer	0.07566	0.0982145	GCST90274805	12	28953348	0.0352	8.41e-06	12_28953348_A_G	11340	Interleukin-1-alpha levels	0.00174707	0.00221585	25.179	41.8887	19.843
rs76544453	T	C	T	C	-0.1609	-0.0353163	0.9585	0.96217	kidney cancer	0.729	0.101936	GCST90274805	14	81651382	0.0361	8.31e-06	14_81651382_T_C	11788	Interleukin-1-alpha levels	0.00168267	0.0020596	24.3245	41.8887	19.8654
rs78267257	A	G	A	G	-0.1825	-0.0613773	0.0323	0.02352	kidney cancer	0.5686	0.107658	GCST90274805	14	83490781	0.0406	6.95e-06	14_83490781_A_G	10903	Interleukin-1-alpha levels	0.00185013	0.00208209	22.7442	41.8887	20.2057
rs10996419	T	C	T	C	-0.1222	0.0654131	0.9188	0.91411	kidney cancer	0.4526	0.0870912	GCST90274806	10	67202938	0.0259	2.38e-06	10_67202938_T_C	11784	Interleukin-2 levels	0.00188584	0.00222818	26.311	41.8887	22.2609
rs111783480	A	G	A	G	-0.1462	0.0532953	0.1075	0.02454	kidney cancer	0.764	0.177514	GCST90274806	4	14756774	0.0329	8.84e-06	4_14756774_A_G	9265	Interleukin-2 levels	0.00212729	0.00410149	38.1485	41.8887	19.7471
rs142641125	T	C	T	C	0.2095	0.00420885	0.0287	0.02249	kidney cancer	0.975	0.134305	GCST90274806	3	12396234	0.0419	5.73e-07	3_12396234_T_C	11789	Interleukin-2 levels	0.00211649	0.002447	28.9135	41.8887	25
rs144129701	C	G	C	G	-0.2699	-0.316356	0.9727	0.98262	kidney cancer	0.05863	0.167299	GCST90274806	14	55563894	0.0576	2.79e-06	14_55563894_C_G	11341	Interleukin-2 levels	0.00193262	0.00386881	44.0388	41.8887	21.9564
rs1657222	A	G	A	G	-0.0621	0.0759096	0.4037	0.3947	kidney cancer	0.05492	0.0395464	GCST90274806	10	34837139	0.0137	5.82e-06	10_34837139_A_G	11340	Interleukin-2 levels	0.00180892	0.00185668	21.0902	41.8887	20.5467
rs1671226	C	G	C	G	-0.0849	0.0281014	0.2053	0.1922	kidney cancer	0.557	0.0478482	GCST90274806	19	55502846	0.017	5.91e-07	19_55502846_C_G	11341	Interleukin-2 levels	0.00219477	0.002352	26.7322	41.8887	24.9412
rs1943222	A	G	A	G	-0.0622	-0.00390762	0.6878	0.7025	kidney cancer	0.9253	0.041677	GCST90274806	18	58028057	0.0138	6.57e-06	18_58028057_A_G	11789	Interleukin-2 levels	0.00172057	0.00166152	19.6169	41.8887	20.3153
rs201229721	A	C	A	C	-0.1468	-0.0194887	0.9396	0.94581	kidney cancer	0.8373	0.0949055	GCST90274806	9	88775115	0.0309	2.03e-06	9_88775115_A_C	9257	Interleukin-2 levels	0.00243277	0.00244603	22.6935	41.8887	22.5702
rs28515912	A	C	A	C	-0.0723	-0.0292229	0.6969	0.682	kidney cancer	0.5488	0.0487406	GCST90274806	17	103299	0.0149	1.22e-06	17_103299_A_C	10723	Interleukin-2 levels	0.00219137	0.00220833	23.7279	41.8887	23.5453
rs36006983	T	C	T	C	-0.0728	-0.00642057	0.7384	0.7311	kidney cancer	0.8833	0.0437407	GCST90274806	16	77431739	0.0153	1.95e-06	16_77431739_T_C	11341	Interleukin-2 levels	0.00199269	0.00204749	23.2641	41.8887	22.6402
rs4703508	T	C	T	C	-0.1216	0.0738079	0.9334	0.93661	kidney cancer	0.4011	0.0879023	GCST90274806	5	35188802	0.026	2.91e-06	5_35188802_T_C	11789	Interleukin-2 levels	0.0018523	0.0018384	21.7091	41.8887	21.8736
rs6535212	T	G	T	G	-0.0646	0.0777453	0.6861	0.7004	kidney cancer	0.06663	0.0423874	GCST90274806	4	138235156	0.0139	3.36e-06	4_138235156_T_G	11784	Interleukin-2 levels	0.00182987	0.00179752	21.2165	41.8887	21.5991
rs74852566	T	G	T	G	-0.1999	0.0599623	0.0244	0.01534	kidney cancer	0.6682	0.139896	GCST90274806	10	2293803	0.0431	3.52e-06	10_2293803_T_G	11789	Interleukin-2 levels	0.0018217	0.00190247	22.4671	41.8887	21.5115
rs75739108	T	C	T	C	0.1737	0.183562	0.039	0.05828	kidney cancer	0.06989	0.101269	GCST90274806	3	137247468	0.038	4.85e-06	3_137247468_T_C	11341	Interleukin-2 levels	0.00183932	0.00226161	25.7025	41.8887	20.8945
rs7638939	A	T	A	T	0.0854	0.0331446	0.8293	0.8057	kidney cancer	0.5331	0.0531776	GCST90274806	3	125991040	0.0174	9.2e-07	3_125991040_A_T	11769	Interleukin-2 levels	0.00204298	0.00206486	24.3475	41.8887	24.0889
rs77832761	A	G	A	G	0.1922	0.0520304	0.0318	0.02352	kidney cancer	0.6681	0.121352	GCST90274806	13	85868678	0.0414	3.44e-06	13_85868678_A_G	11785	Interleukin-2 levels	0.00182581	0.00227473	26.8642	41.8887	21.5529
rs77853517	T	C	T	C	-0.1048	-0.0652855	0.8961	0.90184	kidney cancer	0.3293	0.0669234	GCST90274806	3	64865615	0.0217	1.37e-06	3_64865615_T_C	11787	Interleukin-2 levels	0.00197522	0.00204515	24.1515	41.8887	23.324
rs77880908	T	C	T	C	-0.0886	-0.0258627	0.1258	0.1329	kidney cancer	0.6916	0.065197	GCST90274806	4	47700645	0.0196	6.17e-06	4_47700645_T_C	11770	Interleukin-2 levels	0.0017334	0.00172659	20.3536	41.8887	20.4341
rs79419497	A	G	A	G	0.2016	0.0308201	0.9733	0.97342	kidney cancer	0.7988	0.120911	GCST90274806	2	192579384	0.0424	1.99e-06	2_192579384_A_G	11789	Interleukin-2 levels	0.00191432	0.00211237	24.9512	41.8887	22.6073
rs79925007	T	G	T	G	0.1176	0.0538251	0.9036	0.90593	kidney cancer	0.4254	0.0675272	GCST90274806	4	34713434	0.0255	3.99e-06	4_34713434_T_G	11341	Interleukin-2 levels	0.00187217	0.00240934	27.3855	41.8887	21.2684
rs112421516	A	G	A	G	0.1935	0.04095	0.9708	0.97955	kidney cancer	0.7559	0.131727	GCST90274807	1	67400701	0.0435	8.66e-06	1_67400701_A_G	11336	Interleukin-20 levels	0.00174278	0.00212278	24.1107	41.8887	19.7872
rs114209791	A	G	A	G	-0.2134	-0.314574	0.9756	0.98773	kidney cancer	0.1822	0.23581	GCST90274807	2	52215130	0.046	3.5e-06	2_52215130_A_G	11784	Interleukin-20 levels	0.00182331	0.00216811	25.6001	41.8887	21.5215
rs114363239	T	C	T	C	-0.2372	-0.0958555	0.0189	0.02352	kidney cancer	0.5283	0.152006	GCST90274807	1	41433965	0.0487	1.11e-06	1_41433965_T_C	11782	Interleukin-20 levels	0.0020098	0.00208658	24.6313	41.8887	23.7231
rs115191082	T	G	T	G	-0.2543	-0.0758493	0.0149	0.01431	kidney cancer	0.6683	0.177019	GCST90274807	1	104640701	0.0561	5.82e-06	1_104640701_T_G	11294	Interleukin-20 levels	0.00181638	0.00189841	21.4776	41.8887	20.5479
rs117977288	T	G	T	G	-0.1546	0.0821328	0.9553	0.9683	kidney cancer	0.3962	0.096806	GCST90274807	16	80689313	0.0316	9.96e-07	16_80689313_T_G	11784	Interleukin-20 levels	0.00202742	0.00204125	24.0992	41.8887	23.9356
rs12498781	A	G	A	G	0.0635	-0.0343048	0.3202	0.2873	kidney cancer	0.4085	0.0415043	GCST90274807	4	133183457	0.0137	3.57e-06	4_133183457_A_G	11763	Interleukin-20 levels	0.00182335	0.00175542	20.6817	41.8887	21.4836
rs12969831	A	G	A	G	0.1474	-0.179366	0.9399	0.94274	kidney cancer	0.3724	0.201086	GCST90274807	18	74247282	0.0331	8.46e-06	18_74247282_A_G	11336	Interleukin-20 levels	0.00174661	0.0024546	27.8889	41.8887	19.8307
rs13421547	T	C	T	C	0.147	0.0439519	0.044	0.03579	kidney cancer	0.6853	0.108459	GCST90274807	2	13940522	0.0325	6.09e-06	2_13940522_T_C	11784	Interleukin-20 levels	0.00173339	0.00181792	21.4578	41.8887	20.4582
rs143181662	T	C	T	C	0.0719	0.0473606	0.5043	0.5562	kidney cancer	0.5729	0.0840046	GCST90274807	7	17753237	0.0156	4.05e-06	7_17753237_T_C	8587	Interleukin-20 levels	0.00246828	0.00258461	22.2464	41.8887	21.2426
rs146918864	T	C	T	C	-0.2551	0.123072	0.0228	0.01125	kidney cancer	0.5322	0.197025	GCST90274807	2	141913966	0.0515	7.29e-07	2_141913966_T_C	11438	Interleukin-20 levels	0.00214093	0.00289981	33.2586	41.8887	24.5362
rs188205021	T	C	T	C	-0.222	-0.226099	0.0255	0.02454	kidney cancer	0.1053	0.139595	GCST90274807	11	100596026	0.0427	2e-07	11_100596026_T_C	11774	Interleukin-20 levels	0.00229089	0.00244939	28.905	41.8887	27.0303
rs200680034	A	G	A	G	-0.3598	-0.180487	0.0177	0.01636	kidney cancer	0.401	0.214907	GCST90274807	7	76239511	0.071	4.03e-07	7_76239511_A_G	8243	Interleukin-20 levels	0.00310652	0.00450163	37.2657	41.8887	25.6806
rs2285212	T	C	T	C	-0.1112	0.0944007	0.9158	0.92025	kidney cancer	0.2195	0.0768824	GCST90274807	1	169461481	0.0248	7.33e-06	1_169461481_T_C	11336	Interleukin-20 levels	0.00177073	0.00190701	21.6553	41.8887	20.1051
rs28542561	T	C	T	C	-0.1753	-0.122168	0.965	0.96115	kidney cancer	0.231	0.101994	GCST90274807	15	23769949	0.0372	2.45e-06	15_23769949_T_C	11774	Interleukin-20 levels	0.00188282	0.00207582	24.4874	41.8887	22.2064
rs34172193	A	G	A	G	-0.2175	0.210351	0.02	0.02147	kidney cancer	0.1008	0.128185	GCST90274807	6	112451601	0.0488	8.31e-06	6_112451601_A_G	10918	Interleukin-20 levels	0.00181646	0.0018544	20.2803	41.8887	19.8646
rs34691354	C	G	C	G	0.0651	-0.0180621	0.6659	0.6554	kidney cancer	0.6595	0.0409941	GCST90274807	18	75094435	0.0143	5.3e-06	18_75094435_C_G	11336	Interleukin-20 levels	0.00182521	0.00188572	21.4131	41.8887	20.7248
rs35508685	T	C	T	C	0.1688	-0.0467772	0.9672	0.96933	kidney cancer	0.6428	0.100859	GCST90274807	2	213241261	0.0373	6.03e-06	2_213241261_T_C	11782	Interleukin-20 levels	0.00173551	0.00180786	21.3352	41.8887	20.4799
rs383039	A	G	A	G	-0.0698	-0.0131866	0.2136	0.2321	kidney cancer	0.7767	0.0464934	GCST90274807	1	242399370	0.0156	7.66e-06	1_242399370_A_G	11783	Interleukin-20 levels	0.00169645	0.00163676	19.3143	41.8887	20.0199
rs61992201	T	G	T	G	0.0888	0.00300451	0.1397	0.1247	kidney cancer	0.9587	0.0580189	GCST90274807	14	48507353	0.0201	9.97e-06	14_48507353_T_G	10267	Interleukin-20 levels	0.0018978	0.00189541	19.4933	41.8887	19.5179
rs72633862	T	G	T	G	-0.1722	-0.0732505	0.0444	0.02454	kidney cancer	0.5626	0.126516	GCST90274807	1	9746065	0.0376	4.65e-06	1_9746065_T_G	11774	Interleukin-20 levels	0.00177856	0.00251626	29.6961	41.8887	20.9745
rs72659995	T	C	T	C	-0.1232	-0.329199	0.9142	0.91616	kidney cancer	0.03254	0.153996	GCST90274807	14	21169862	0.0267	3.95e-06	14_21169862_T_C	11336	Interleukin-20 levels	0.001875	0.00238111	27.0519	41.8887	21.2911
rs73192044	A	G	A	G	-0.1066	0.119293	0.9032	0.8906	kidney cancer	0.08307	0.0688304	GCST90274807	3	119431497	0.0237	6.86e-06	3_119431497_A_G	11336	Interleukin-20 levels	0.0017818	0.00198703	22.5658	41.8887	20.231
rs113105910	A	G	A	G	-0.2425	-0.265053	0.0165	0.01125	kidney cancer	0.1866	0.200691	GCST90274808	11	5315973	0.0538	6.56e-06	11_5315973_A_G	11786	Interleukin-20 receptor subunit alpha levels	0.00172115	0.00190859	22.5338	41.8887	20.317
rs113153423	A	G	A	G	0.1913	-0.0990472	0.972	0.97035	kidney cancer	0.3454	0.104973	GCST90274808	8	139987300	0.0407	2.6e-06	8_139987300_A_G	11792	Interleukin-20 receptor subunit alpha levels	0.00187031	0.00199198	23.5323	41.8887	22.0923
rs113563938	A	T	A	T	0.3176	0.414623	0.9871	0.98773	kidney cancer	0.3701	0.462601	GCST90274808	7	12560554	0.0676	2.62e-06	7_12560554_A_T	11344	Interleukin-20 receptor subunit alpha levels	0.00194238	0.00256887	29.2111	41.8887	22.0733
rs115680168	T	C	T	C	-0.3364	-0.0701788	0.0177	0.0184	kidney cancer	0.7294	0.202874	GCST90274808	4	164735206	0.0757	8.84e-06	4_164735206_T_C	7586	Interleukin-20 receptor subunit alpha levels	0.00259712	0.00393513	29.962	41.8887	19.7479
rs11987533	A	G	A	G	0.1171	-0.000299955	0.1374	0.1207	kidney cancer	0.9955	0.053184	GCST90274808	8	35154239	0.0198	3.34e-09	8_35154239_A_G	11344	Interleukin-20 receptor subunit alpha levels	0.00307437	0.00325042	36.9865	41.8887	34.9771
rs12056343	T	G	T	G	-0.0761	0.0577971	0.7494	0.7229	kidney cancer	0.5664	0.100804	GCST90274808	8	79840734	0.0166	4.55e-06	8_79840734_T_G	9894	Interleukin-20 receptor subunit alpha levels	0.00212006	0.00217517	21.5637	41.8887	21.0161
rs12138611	C	G	C	G	0.119	0.169603	0.1039	0.09202	kidney cancer	0.3272	0.173105	GCST90274808	1	168180874	0.0256	3.34e-06	1_168180874_C_G	11344	Interleukin-20 receptor subunit alpha levels	0.00190151	0.00263691	29.987	41.8887	21.608
rs143067549	T	C	T	C	-0.4166	0.252959	0.0114	0.01329	kidney cancer	0.4325	0.322273	GCST90274808	5	46131995	0.091	4.69e-06	5_46131995_T_C	7315	Interleukin-20 receptor subunit alpha levels	0.0028577	0.00391196	28.7205	41.8887	20.9583
rs145607970	A	C	A	C	-0.2162	0.106139	0.0367		kidney cancer	0.4241	0.132785	GCST90274808	6	32624017	0.048	6.66e-06	6_32624017_A_C	7523	Interleukin-20 receptor subunit alpha levels	0.00269019	0.00330498	24.9392	41.8887	20.2875
rs149111746	A	G	A	G	0.2357	-0.0265446	0.0208	0.02658	kidney cancer	0.8669	0.158383	GCST90274808	17	59389022	0.0511	3.98e-06	17_59389022_A_G	11783	Interleukin-20 receptor subunit alpha levels	0.00180265	0.002263	26.7208	41.8887	21.2754
rs188200783	T	C	T	C	-0.2004	-0.00279609	0.0429	0.03783	kidney cancer	0.9924	0.293542	GCST90274808	5	22203180	0.0449	8.07e-06	5_22203180_T_C	8974	Interleukin-20 receptor subunit alpha levels	0.00221539	0.00329792	29.6868	41.8887	19.9206
rs2064077	T	C	T	C	0.1072	-0.0125213	0.083	0.07771	kidney cancer	0.8673	0.0749378	GCST90274808	1	171216897	0.0241	8.66e-06	1_171216897_T_C	11790	Interleukin-20 receptor subunit alpha levels	0.00167566	0.00174931	20.657	41.8887	19.7859
rs2883991	T	C	T	C	0.08	-0.0800119	0.8477	0.8599	kidney cancer	0.1394	0.0541342	GCST90274808	2	53038599	0.0181	9.88e-06	2_53038599_T_C	11789	Interleukin-20 receptor subunit alpha levels	0.00165463	0.00165254	19.5107	41.8887	19.5354
rs4667792	T	C	T	C	-0.0606	0.0062193	0.5471	0.5409	kidney cancer	0.8744	0.0393447	GCST90274808	2	166018354	0.0135	7.16e-06	2_166018354_T_C	11344	Interleukin-20 receptor subunit alpha levels	0.00177344	0.00181989	20.6788	41.8887	20.1501
rs540645152	A	C	A	C	-0.0817	-0.100388	0.4221	0.4008	kidney cancer	0.02819	0.0457426	GCST90274808	1	153082377	0.0155	1.36e-07	1_153082377_A_C	8814	Interleukin-20 receptor subunit alpha levels	0.00314296	0.00325643	28.7894	41.8887	27.7831
rs59446445	A	G	A	G	0.1741	-0.0240095	0.0321	0.02658	kidney cancer	0.8335	0.114214	GCST90274808	5	154577444	0.038	4.61e-06	5_154577444_A_G	11790	Interleukin-20 receptor subunit alpha levels	0.00177753	0.00188349	22.2445	41.8887	20.9909
rs6920753	A	G	A	G	-0.0664	-0.00561574	0.704	0.7311	kidney cancer	0.8955	0.0427546	GCST90274808	6	158071161	0.0144	4.01e-06	6_158071161_A_G	11762	Interleukin-20 receptor subunit alpha levels	0.00180476	0.00183751	21.6489	41.8887	21.2623
rs71476058	A	T	A	T	-0.2711	0.0421771	0.0278	0.01431	kidney cancer	0.784	0.153869	GCST90274808	11	109386685	0.0606	7.69e-06	11_109386685_A_T	7943	Interleukin-20 receptor subunit alpha levels	0.00251388	0.00397273	31.6733	41.8887	20.0131
rs72785422	T	C	T	C	0.0897	-0.0632593	0.8313	0.8701	kidney cancer	0.5966	0.119516	GCST90274808	16	14288564	0.0195	4.22e-06	16_14288564_T_C	11343	Interleukin-20 receptor subunit alpha levels	0.00186232	0.00225677	25.6519	41.8887	21.16
rs74032581	A	T	A	T	-0.1343	0.0558131	0.9366	0.93456	kidney cancer	0.5099	0.0846944	GCST90274808	16	83519341	0.0298	6.58e-06	16_83519341_A_T	11344	Interleukin-20 receptor subunit alpha levels	0.00178753	0.00214203	24.347	41.8887	20.3104
rs9817113	T	C	T	C	0.1541	-0.000499875	0.0446	0.04499	kidney cancer	0.9963	0.107795	GCST90274808	3	151178393	0.0346	8.44e-06	3_151178393_T_C	11790	Interleukin-20 receptor subunit alpha levels	0.0016799	0.00202374	23.9043	41.8887	19.836
rs114416525	A	G	A	G	0.2819	0.225521	0.0142	0.01022	kidney cancer	0.1322	0.1498	GCST90274809	3	99744651	0.0619	5.26e-06	3_99744651_A_G	11345	Interleukin-22 receptor subunit alpha-1 levels	0.0018251	0.00222483	25.2925	41.8887	20.74
rs11607326	A	T	A	T	-0.0919	0.0152152	0.1246	0.1227	kidney cancer	0.7928	0.0579236	GCST90274809	11	83564435	0.0206	8.15e-06	11_83564435_A_T	11345	Interleukin-22 receptor subunit alpha-1 levels	0.00175149	0.00184241	20.937	41.8887	19.902
rs11777386	A	G	A	G	-0.1003	0.005286	0.0953	0.1176	kidney cancer	0.9363	0.0661403	GCST90274809	8	52767675	0.0224	7.55e-06	8_52767675_A_G	11779	Interleukin-22 receptor subunit alpha-1 levels	0.00169954	0.00173472	20.4653	41.8887	20.0496
rs12240324	A	G	A	G	0.2203	0.1415	0.9713	0.98262	kidney cancer	0.4469	0.186038	GCST90274809	10	44669337	0.047	2.77e-06	10_44669337_A_G	11793	Interleukin-22 receptor subunit alpha-1 levels	0.00185983	0.00270579	31.9905	41.8887	21.9702
rs13169282	A	G	A	G	-0.0709	-0.0281987	0.2216	0.2096	kidney cancer	0.5559	0.0478802	GCST90274809	5	144256718	0.0158	7.21e-06	5_144256718_A_G	11783	Interleukin-22 receptor subunit alpha-1 levels	0.0017063	0.00173418	20.4659	41.8887	20.1362
rs13257574	T	C	T	C	0.2714	0.0777453	0.0167	0.01431	kidney cancer	0.6647	0.179371	GCST90274809	8	87485765	0.0584	3.36e-06	8_87485765_T_C	11306	Interleukin-22 receptor subunit alpha-1 levels	0.00190692	0.00241909	27.4117	41.8887	21.597
rs143949731	T	C	T	C	0.1655	-0.170924	0.0384	0.02045	kidney cancer	0.1608	0.121881	GCST90274809	18	22333712	0.0366	6.13e-06	18_22333712_T_C	11782	Interleukin-22 receptor subunit alpha-1 levels	0.00173275	0.00202279	23.8768	41.8887	20.4472
rs1473089	A	C	A	C	0.2679	0.132503	0.0253	0.02249	kidney cancer	0.4156	0.162765	GCST90274809	4	26143082	0.0561	1.79e-06	4_26143082_A_C	10916	Interleukin-22 receptor subunit alpha-1 levels	0.00208511	0.0035397	38.7696	41.8887	22.8045
rs17256492	T	C	T	C	-0.0751	-0.0471964	0.7694	0.7863	kidney cancer	0.3102	0.046508	GCST90274809	14	62394907	0.0162	3.56e-06	14_62394907_T_C	11345	Interleukin-22 receptor subunit alpha-1 levels	0.00189104	0.00200134	22.7467	41.8887	21.4907
rs3181361	T	C	T	C	0.27	-0.251459	0.0163	0.01125	kidney cancer	0.1682	0.18248	GCST90274809	9	117667449	0.0582	3.5e-06	9_117667449_T_C	11345	Interleukin-22 receptor subunit alpha-1 levels	0.00189378	0.0023378	26.5798	41.8887	21.5219
rs369913010	T	C	T	C	-0.2141	0.160521	0.0264	0.02454	kidney cancer	0.2363	0.135542	GCST90274809	12	131925456	0.0484	9.71e-06	12_131925456_T_C	9246	Interleukin-22 receptor subunit alpha-1 levels	0.00211234	0.00235639	21.834	41.8887	19.5678
rs4466	A	G	A	G	0.0906	0.043251	0.1324	0.1268	kidney cancer	0.465	0.0591962	GCST90274809	22	35723831	0.0203	8.08e-06	22_35723831_A_G	11792	Interleukin-22 receptor subunit alpha-1 levels	0.00168662	0.00188579	22.2755	41.8887	19.9189
rs4811167	T	C	T	C	0.0632	-0.0535408	0.5504	0.5654	kidney cancer	0.1689	0.0389176	GCST90274809	20	50001752	0.0134	2.4e-06	20_50001752_T_C	11793	Interleukin-22 receptor subunit alpha-1 levels	0.00188302	0.00197683	23.3549	41.8887	22.2446
rs56282088	A	G	A	G	0.2815	-0.110378	0.0165	0.01636	kidney cancer	0.505	0.165573	GCST90274809	8	81502336	0.0571	8.23e-07	8_81502336_A_G	10919	Interleukin-22 receptor subunit alpha-1 levels	0.00222134	0.00257185	28.1492	41.8887	24.3044
rs7158900	A	G	A	G	-0.0674	-0.00642057	0.6092	0.6145	kidney cancer	0.8718	0.0397872	GCST90274809	14	94197473	0.0138	1.04e-06	14_94197473_A_G	11344	Interleukin-22 receptor subunit alpha-1 levels	0.00209874	0.00216304	24.5864	41.8887	23.854
rs75590335	A	G	A	G	0.1722	-0.219858	0.0376	0.0409	kidney cancer	0.0546	0.114388	GCST90274809	4	157031745	0.037	3.25e-06	4_157031745_A_G	11345	Interleukin-22 receptor subunit alpha-1 levels	0.00190593	0.00214605	24.395	41.8887	21.6602
rs78594373	T	C	T	C	-0.1271	-0.11181	0.0671	0.09305	kidney cancer	0.1556	0.0787377	GCST90274809	2	85320044	0.0273	3.23e-06	2_85320044_T_C	11767	Interleukin-22 receptor subunit alpha-1 levels	0.00183897	0.00202245	23.8424	41.8887	21.6753
rs79229049	A	T	A	T	-0.2102	0.115024	0.9695	0.9683	kidney cancer	0.3309	0.1183	GCST90274809	7	81154741	0.0412	3.36e-07	7_81154741_A_T	11781	Interleukin-22 receptor subunit alpha-1 levels	0.00220498	0.00261302	30.8594	41.8887	26.0298
rs11066309	A	G	A	G	0.0655	-0.0256677	0.4172	0.4192	kidney cancer	0.5162	0.0395366	GCST90274810	12	112883476	0.0137	1.74e-06	12_112883476_A_G	11336	Interleukin-24 levels	0.00201272	0.0020863	23.6955	41.8887	22.8582
rs11256610	A	G	A	G	0.3005	-0.161353	0.0145	0.0184	kidney cancer	0.401	0.192125	GCST90274810	10	6122343	0.0641	2.76e-06	10_6122343_A_G	10850	Interleukin-24 levels	0.00202183	0.00258074	28.0683	41.8887	21.9772
rs116790447	T	C	T	C	0.1729	-0.00538547	0.0521	0.06442	kidney cancer	0.9777	0.192665	GCST90274810	1	18931322	0.0371	3.16e-06	1_18931322_T_C	9453	Interleukin-24 levels	0.00229281	0.00295271	27.9887	41.8887	21.7191
rs117613902	A	G	A	G	-0.3	-0.08534	0.9862	0.98875	kidney cancer	0.6292	0.176741	GCST90274810	14	97741799	0.0657	4.97e-06	14_97741799_A_G	10850	Interleukin-24 levels	0.00191835	0.00244972	26.6398	41.8887	20.8503
rs12275648	T	C	T	C	-0.0696	-0.00995033	0.3114	0.3323	kidney cancer	0.8083	0.041012	GCST90274810	11	129057999	0.0155	7.11e-06	11_129057999_T_C	10277	Interleukin-24 levels	0.00195849	0.00207747	21.3904	41.8887	20.163
rs12588414	A	G	A	G	0.0753	-0.0216323	0.2361	0.2403	kidney cancer	0.6801	0.052464	GCST90274810	14	104576816	0.0169	8.37e-06	14_104576816_A_G	10273	Interleukin-24 levels	0.00192915	0.00204528	21.0501	41.8887	19.8526
rs143986178	A	G	A	G	0.2969	0.0846868	0.0144	0.01431	kidney cancer	0.6202	0.170889	GCST90274810	21	26067535	0.0644	4.02e-06	21_26067535_A_G	10850	Interleukin-24 levels	0.00195546	0.00250215	27.2114	41.8887	21.2544
rs145295031	A	T	A	T	0.3063	0.0272684	0.014	0.01227	kidney cancer	0.8605	0.155165	GCST90274810	7	9959098	0.0647	2.2e-06	7_9959098_A_T	11287	Interleukin-24 levels	0.00198209	0.00259017	29.306	41.8887	22.4122
rs145450029	T	G	T	G	-0.2153	0.0529789	0.0246	0.02045	kidney cancer	0.7333	0.155482	GCST90274810	11	76932037	0.0484	8.65e-06	11_76932037_T_G	11784	Interleukin-24 levels	0.00167668	0.00222452	26.2677	41.8887	19.7878
rs145660089	T	C	T	C	0.2004	-0.00886063	0.0274	0.03272	kidney cancer	0.9407	0.11911	GCST90274810	11	94477313	0.0446	7.01e-06	11_94477313_T_C	11779	Interleukin-24 levels	0.00171138	0.00214048	25.2625	41.8887	20.1895
rs145891540	T	G	T	G	0.1913	-0.155635	0.0315	0.02045	kidney cancer	0.2125	0.124836	GCST90274810	12	93849398	0.0422	5.81e-06	12_93849398_T_G	11772	Interleukin-24 levels	0.00174289	0.0022329	26.3401	41.8887	20.5497
rs167018	A	G	A	G	0.0657	0.0474061	0.4443	0.4049	kidney cancer	0.2916	0.044951	GCST90274810	7	155623090	0.0136	1.36e-06	7_155623090_A_G	11336	Interleukin-24 levels	0.00205483	0.00213146	24.2096	41.8887	23.3374
rs2165910	A	G	A	G	0.0674	-0.00521357	0.7371	0.7321	kidney cancer	0.9055	0.0439161	GCST90274810	18	7919506	0.015	7.01e-06	18_7919506_A_G	11768	Interleukin-24 levels	0.00171303	0.00176063	20.752	41.8887	20.19
rs2341294	A	G	A	G	-0.1318	-0.0670042	0.0716	0.04806	kidney cancer	0.4	0.0796133	GCST90274810	5	149232308	0.028	2.51e-06	5_149232308_A_G	9900	Interleukin-24 levels	0.00223355	0.00230945	22.9119	41.8887	22.1572
rs36183478	T	C	T	C	0.0815	0.086975	0.4915	0.4908	kidney cancer	0.5884	0.160721	GCST90274810	1	236592040	0.0172	2.15e-06	1_236592040_T_C	8587	Interleukin-24 levels	0.00260846	0.00332016	28.5986	41.8887	22.4522
rs60306270	A	G	A	G	-0.0886	-0.0393169	0.1398	0.1391	kidney cancer	0.5078	0.0593671	GCST90274810	16	49575164	0.0191	3.51e-06	16_49575164_A_G	11781	Interleukin-24 levels	0.00182347	0.00188801	22.2809	41.8887	21.5179
rs61760504	C	G	C	G	0.12	0.027226	0.9234	0.91922	kidney cancer	0.7379	0.0813601	GCST90274810	4	47684375	0.0265	5.95e-06	4_47684375_C_G	11337	Interleukin-24 levels	0.00180578	0.00203709	23.1376	41.8887	20.5055
rs61997688	T	C	T	C	-0.0757	0.0739937	0.8019	0.8047	kidney cancer	0.1314	0.0490478	GCST90274810	14	57398908	0.017	8.47e-06	14_57398908_T_C	11772	Interleukin-24 levels	0.00168185	0.00182065	21.4681	41.8887	19.8287
rs73169406	A	G	A	G	0.111	0.105694	0.1327	0.1176	kidney cancer	0.06958	0.0582453	GCST90274810	22	48661109	0.0207	8.22e-08	22_48661109_A_G	11337	Interleukin-24 levels	0.00253037	0.00283607	32.2382	41.8887	28.7545
rs76088721	T	C	T	C	0.1847	0.0516432	0.9596	0.97137	kidney cancer	0.6178	0.1035	GCST90274810	9	23373327	0.0417	9.46e-06	9_23373327_T_C	8587	Interleukin-24 levels	0.00227998	0.00264506	22.7681	41.8887	19.6183
rs11153066	T	C	T	C	0.0615	-0.00737275	0.5833	0.5685	kidney cancer	0.8527	0.0397079	GCST90274811	6	107846644	0.0137	7.15e-06	6_107846644_T_C	11343	Interleukin-2 receptor subunit beta levels	0.00177373	0.00183864	20.8904	41.8887	20.1516
rs111805691	A	G	A	G	-0.1278	0.0889405	0.0648	0.06442	kidney cancer	0.252	0.0776431	GCST90274811	4	13099601	0.0286	7.88e-06	4_13099601_A_G	11344	Interleukin-2 receptor subunit beta levels	0.00175742	0.00197957	22.4968	41.8887	19.9678
rs115890206	A	G	A	G	0.232	-0.0352128	0.9786	0.97546	kidney cancer	0.7961	0.136273	GCST90274811	2	171243489	0.0502	3.81e-06	2_171243489_A_G	10403	Interleukin-2 receptor subunit beta levels	0.00204929	0.00225437	23.5007	41.8887	21.3584
rs116007066	A	G	A	G	-0.2101	0.0770971	0.025	0.02761	kidney cancer	0.5371	0.124913	GCST90274811	4	136755243	0.0441	1.9e-06	4_136755243_A_G	10295	Interleukin-2 receptor subunit beta levels	0.00220027	0.00215192	22.1975	41.8887	22.6973
rs116068903	T	C	T	C	0.2831	-0.0821328	0.0151	0.01227	kidney cancer	0.6188	0.165074	GCST90274811	1	67498721	0.0636	8.54e-06	1_67498721_T_C	10470	Interleukin-2 receptor subunit beta levels	0.00188921	0.00238385	25.0138	41.8887	19.8137
rs11630708	T	C	T	C	-0.2102	-0.103584	0.9766	0.96933	kidney cancer	0.4402	0.134202	GCST90274811	15	84665328	0.0443	2.09e-06	15_84665328_T_C	11788	Interleukin-2 receptor subunit beta levels	0.00190661	0.00201943	23.8491	41.8887	22.5143
rs116381951	T	C	T	C	0.2794	-0.106472	0.9817	0.98466	kidney cancer	0.5408	0.174087	GCST90274811	1	177439129	0.063	9.21e-06	1_177439129_T_C	9983	Interleukin-2 receptor subunit beta levels	0.00196672	0.00280487	28.0741	41.8887	19.6685
rs117538197	T	C	T	C	0.1213	0.108031	0.0695	0.07055	kidney cancer	0.1614	0.077144	GCST90274811	17	4507431	0.0261	3.36e-06	17_4507431_T_C	11774	Interleukin-2 receptor subunit beta levels	0.00183145	0.00190306	22.4456	41.8887	21.5993
rs117953283	T	G	T	G	0.1688	-0.414491	0.0635	0.04294	kidney cancer	0.1669	0.29987	GCST90274811	17	74316443	0.0374	6.38e-06	17_74316443_T_G	8397	Interleukin-2 receptor subunit beta levels	0.00242063	0.00338888	28.5464	41.8887	20.3705
rs13001788	T	C	T	C	0.2769	-0.153851	0.9745	0.97853	kidney cancer	0.276	0.141232	GCST90274811	2	31896839	0.0557	6.65e-07	2_31896839_T_C	8243	Interleukin-2 receptor subunit beta levels	0.00298989	0.00381064	31.5236	41.8887	24.7136
rs141460846	T	C	T	C	-0.2471	-0.108254	0.9783	0.97853	kidney cancer	0.4247	0.135606	GCST90274811	11	40470032	0.0535	3.86e-06	11_40470032_T_C	11304	Interleukin-2 receptor subunit beta levels	0.00188393	0.00259243	29.3758	41.8887	21.3323
rs1472270	C	G	C	G	0.0704	-0.0370067	0.346	0.3517	kidney cancer	0.3756	0.0417668	GCST90274811	7	98121843	0.0144	1.01e-06	7_98121843_C_G	11344	Interleukin-2 receptor subunit beta levels	0.00210289	0.002243	25.4973	41.8887	23.9012
rs147955591	A	C	A	C	-0.0739	-0.042197	0.2186	0.2188	kidney cancer	0.4094	0.051151	GCST90274811	8	120536724	0.0166	8.52e-06	8_120536724_A_C	11344	Interleukin-2 receptor subunit beta levels	0.00174431	0.0018657	21.2004	41.8887	19.8186
rs17549820	T	C	T	C	0.0631	0.0915759	0.5622	0.5828	kidney cancer	0.2594	0.081198	GCST90274811	4	108118301	0.0129	1e-06	4_108118301_T_C	11791	Interleukin-2 receptor subunit beta levels	0.00202545	0.00196	23.1518	41.8887	23.9265
rs2157876	T	G	T	G	-0.1133	-0.00269636	0.0879	0.0818	kidney cancer	0.9701	0.0719358	GCST90274811	12	111592380	0.0239	2.13e-06	12_111592380_T_G	11343	Interleukin-2 receptor subunit beta levels	0.00197767	0.00205836	23.392	41.8887	22.4732
rs2281533	C	G	C	G	-0.1844	0.287415	0.0481	0.03476	kidney cancer	0.02244	0.125903	GCST90274811	20	6103768	0.0404	5.01e-06	20_6103768_C_G	11776	Interleukin-2 receptor subunit beta levels	0.00176631	0.00311378	36.7762	41.8887	20.8333
rs301439	C	G	C	G	-0.0643	0.00120072	0.6412	0.6493	kidney cancer	0.9759	0.0397465	GCST90274811	9	4589802	0.0144	8e-06	9_4589802_C_G	11344	Interleukin-2 receptor subunit beta levels	0.00175487	0.00190238	21.618	41.8887	19.9387
rs34246740	T	C	T	C	-0.0721	0.0953002	0.2619	0.2444	kidney cancer	0.3239	0.0966068	GCST90274811	11	36198233	0.0156	3.8e-06	11_36198233_T_C	11344	Interleukin-2 receptor subunit beta levels	0.00187981	0.00200979	22.841	41.8887	21.361
rs55757846	A	G	A	G	-0.1021	0.00299551	0.8947	0.8947	kidney cancer	0.9631	0.0647485	GCST90274811	14	25692351	0.0231	9.87e-06	14_25692351_A_G	11344	Interleukin-2 receptor subunit beta levels	0.00171945	0.00196421	22.3219	41.8887	19.5356
rs55987136	T	C	T	C	-0.1967	-0.0565704	0.9753	0.98569	kidney cancer	0.6481	0.123948	GCST90274811	16	12220199	0.0443	8.99e-06	16_12220199_T_C	11781	Interleukin-2 receptor subunit beta levels	0.00167096	0.00186412	21.9985	41.8887	19.7152
rs71476282	T	C	T	C	-0.1842	-0.420288	0.0363	0.02761	kidney cancer	0.00288	0.141024	GCST90274811	11	115220909	0.0412	7.79e-06	11_115220909_T_C	11344	Interleukin-2 receptor subunit beta levels	0.00175926	0.00237387	26.9886	41.8887	19.9887
rs9321271	A	C	A	C	-0.157	0.0491902	0.9549	0.9499	kidney cancer	0.6085	0.0960342	GCST90274811	6	131393771	0.0325	1.36e-06	6_131393771_A_C	11779	Interleukin-2 receptor subunit beta levels	0.0019776	0.00212307	25.0566	41.8887	23.3363
rs9921181	A	G	A	G	-0.0606	0.00179838	0.4465	0.4857	kidney cancer	0.9634	0.0391912	GCST90274811	16	80775714	0.0128	2.2e-06	16_80775714_A_G	11786	Interleukin-2 receptor subunit beta levels	0.00189849	0.00181516	21.4287	41.8887	22.4143
rs1013434	T	C	T	C	-0.0732	0.00270365	0.2201	0.2403	kidney cancer	0.9543	0.0471777	GCST90274812	21	40484010	0.0158	3.61e-06	21_40484010_T_C	11783	Interleukin-33 levels	0.00181859	0.00183955	21.7117	41.8887	21.4639
rs10415966	A	C	A	C	-0.1184	0.0646452	0.1177	0.1227	kidney cancer	0.3556	0.0699789	GCST90274812	19	14299739	0.0233	3.74e-07	19_14299739_A_C	10281	Interleukin-33 levels	0.00250583	0.00291156	30.0153	41.8887	25.8221
rs10941408	T	C	T	C	-0.0666	0.00210221	0.2923	0.316	kidney cancer	0.9602	0.0421262	GCST90274812	5	38788544	0.0148	6.8e-06	5_38788544_T_C	11345	Interleukin-33 levels	0.00178206	0.00183509	20.8537	41.8887	20.25
rs10944013	T	G	T	G	0.174	0.177812	0.9427	0.97751	kidney cancer	0.2583	0.157297	GCST90274812	6	85296041	0.0389	7.71e-06	6_85296041_T_G	9257	Interleukin-33 levels	0.00215717	0.00327082	30.3708	41.8887	20.0078
rs12453636	A	G	A	G	-0.1028	0.0152152	0.1006	0.1074	kidney cancer	0.8195	0.0666782	GCST90274812	17	64288475	0.0231	8.58e-06	17_64288475_A_G	9892	Interleukin-33 levels	0.00199847	0.00191235	18.9494	41.8887	19.8044
rs1273797	A	G	A	G	-0.0652	0.0556239	0.4698	0.455	kidney cancer	0.2094	0.0443142	GCST90274812	2	227438887	0.0144	5.96e-06	2_227438887_A_G	9252	Interleukin-33 levels	0.0022114	0.00211777	19.6309	41.8887	20.5008
rs13336496	A	C	A	C	0.0936	-0.0569937	0.8755	0.8661	kidney cancer	0.3048	0.0555389	GCST90274812	16	79491576	0.0203	4.01e-06	16_79491576_A_C	11780	Interleukin-33 levels	0.00180179	0.00190989	22.5377	41.8887	21.2598
rs17147023	T	C	T	C	0.0689	0.0882856	0.7409	0.7117	kidney cancer	0.06056	0.0470431	GCST90274812	9	133361010	0.0154	7.68e-06	9_133361010_T_C	11344	Interleukin-33 levels	0.00176174	0.00182262	20.7099	41.8887	20.0169
rs17149396	C	G	C	G	0.1833	-0.0180364	0.0307	0.02454	kidney cancer	0.8892	0.129463	GCST90274812	7	24423445	0.04	4.59e-06	7_24423445_C_G	11789	Interleukin-33 levels	0.0017784	0.00199964	23.617	41.8887	20.9993
rs28658099	A	T	A	T	0.0848	-0.0480354	0.8568	0.8528	kidney cancer	0.3762	0.0542823	GCST90274812	4	45839898	0.0188	6.46e-06	4_45839898_A_T	11773	Interleukin-33 levels	0.00172549	0.00176459	20.8077	41.8887	20.3459
rs35370544	T	G	T	G	0.1741	-0.0639133	0.047	0.04192	kidney cancer	0.593	0.119577	GCST90274812	4	189492967	0.0364	1.73e-06	4_189492967_T_G	8385	Interleukin-33 levels	0.00272152	0.0027153	22.8244	41.8887	22.8768
rs6099755	A	G	A	G	0.095	0.0403013	0.1263	0.1012	kidney cancer	0.5297	0.0641267	GCST90274812	20	56364589	0.0212	7.42e-06	20_56364589_A_G	11345	Interleukin-33 levels	0.00176717	0.00199179	22.6379	41.8887	20.0805
rs62556318	C	G	C	G	0.1308	-0.091896	0.9172	0.92025	kidney cancer	0.5946	0.172678	GCST90274812	9	21663051	0.0277	2.34e-06	9_21663051_C_G	11345	Interleukin-33 levels	0.00196189	0.0025986	29.5527	41.8887	22.2975
rs66755903	A	G	A	G	-0.0752	-0.029753	0.2321	0.2239	kidney cancer	0.5286	0.0472161	GCST90274812	8	87995921	0.0162	3.45e-06	8_87995921_A_G	11345	Interleukin-33 levels	0.00189607	0.00201579	22.9113	41.8887	21.5479
rs75671803	A	G	A	G	0.2055	-0.0718183	0.9763	0.98875	kidney cancer	0.5627	0.124074	GCST90274812	7	83421169	0.0451	5.2e-06	7_83421169_A_G	11785	Interleukin-33 levels	0.00175894	0.00195427	23.0723	41.8887	20.7621
rs77248338	T	G	T	G	0.2314	-0.108811	0.9759	0.97137	kidney cancer	0.3376	0.113473	GCST90274812	15	98506292	0.0518	7.93e-06	15_98506292_T_G	10471	Interleukin-33 levels	0.00190255	0.00251871	26.435	41.8887	19.9557
rs7742625	C	G	C	G	0.0691	-0.0199987	0.6997	0.7086	kidney cancer	0.644	0.0432766	GCST90274812	6	38719850	0.0148	3.03e-06	6_38719850_C_G	11345	Interleukin-33 levels	0.0019181	0.00200657	22.8062	41.8887	21.7988
rs77792454	T	C	T	C	-0.1166	-0.0353671	0.1064	0.1207	kidney cancer	0.6207	0.0714692	GCST90274812	6	156872261	0.0255	4.82e-06	6_156872261_T_C	8817	Interleukin-33 levels	0.00236628	0.00258531	22.8485	41.8887	20.9082
rs78455659	A	G	A	G	0.1259	-0.161813	0.9273	0.91309	kidney cancer	0.04779	0.0817556	GCST90274812	12	96439814	0.0273	3.99e-06	12_96439814_A_G	11345	Interleukin-33 levels	0.00187148	0.00213716	24.2937	41.8887	21.268
rs79106704	T	C	T	C	-0.1015	-0.00558438	0.1034	0.1012	kidney cancer	0.9335	0.0669252	GCST90274812	16	82628079	0.0227	7.77e-06	16_82628079_T_C	9909	Interleukin-33 levels	0.00201402	0.00191021	18.9607	41.8887	19.9931
rs79417946	T	C	T	C	-0.1259	-0.038836	0.0665	0.07566	kidney cancer	0.6258	0.0796396	GCST90274812	9	31779365	0.0285	9.98e-06	9_31779365_T_C	11345	Interleukin-33 levels	0.00171746	0.00196796	22.3666	41.8887	19.5147
rs8042883	T	C	T	C	-0.0681	-0.0330479	0.5496	0.544	kidney cancer	0.4611	0.0448388	GCST90274812	15	66970271	0.0135	4.55e-07	15_66970271_T_C	11345	Interleukin-33 levels	0.00223834	0.00229599	26.1033	41.8887	25.4464
rs10910814	C	G	C	G	0.1919	0.226023	0.0407	0.04192	kidney cancer	0.02324	0.0995929	GCST90274813	1	145427960	0.0417	4.19e-06	1_145427960_C_G	7953	Interleukin-4 levels	0.00265644	0.0028756	22.9298	41.8887	21.1777
rs116963481	A	G	A	G	0.2805	-0.131704	0.9846	0.98773	kidney cancer	0.4819	0.18728	GCST90274813	10	34284406	0.0592	2.16e-06	10_34284406_A_G	11793	Interleukin-4 levels	0.0019004	0.00238603	28.201	41.8887	22.4503
rs11989681	A	G	A	G	0.0678	0.0219572	0.5982	0.6135	kidney cancer	0.5788	0.0395526	GCST90274813	8	22649912	0.0136	6.19e-07	8_22649912_A_G	11345	Interleukin-4 levels	0.00218627	0.00220976	25.1209	41.8887	24.8532
rs12481726	T	C	T	C	-0.313	0.189951	0.0162	0.01329	kidney cancer	0.6088	0.371152	GCST90274813	20	51651490	0.0706	9.27e-06	20_51651490_T_C	9849	Interleukin-4 levels	0.00199209	0.00312277	30.8463	41.8887	19.6553
rs12641440	C	G	C	G	-0.1181	-0.0809932	0.9065	0.91411	kidney cancer	0.2716	0.0736713	GCST90274813	4	185529634	0.025	2.31e-06	4_185529634_C_G	11345	Interleukin-4 levels	0.00196353	0.00236434	26.8822	41.8887	22.3162
rs13130198	A	G	A	G	-0.0773	-0.00608147	0.2374	0.2096	kidney cancer	0.8958	0.0464345	GCST90274813	4	40156881	0.0159	1.16e-06	4_40156881_A_G	11345	Interleukin-4 levels	0.00207938	0.00216355	24.5943	41.8887	23.6355
rs13418255	A	G	A	G	0.0701	-0.031078	0.7233	0.7526	kidney cancer	0.4823	0.0442323	GCST90274813	2	107668175	0.0153	4.61e-06	2_107668175_A_G	11345	Interleukin-4 levels	0.00184724	0.00196695	22.3551	41.8887	20.992
rs1490743	T	G	T	G	-0.1338	-0.0371994	0.0752	0.05624	kidney cancer	0.6559	0.0834853	GCST90274813	9	117036047	0.0278	1.49e-06	9_117036047_T_G	10281	Interleukin-4 levels	0.00224851	0.00249005	25.6591	41.8887	23.1645
rs2502347	T	C	T	C	-0.077	-0.0387408	0.2195	0.2055	kidney cancer	0.4058	0.0466023	GCST90274813	1	243071390	0.0167	4.01e-06	1_243071390_T_C	11345	Interleukin-4 levels	0.00187071	0.00203151	23.0903	41.8887	21.2593
rs371539	T	G	T	G	0.0797	-0.0538251	0.8324	0.8374	kidney cancer	0.288	0.050658	GCST90274813	11	131406108	0.0177	6.71e-06	11_131406108_T_G	11775	Interleukin-4 levels	0.00171924	0.00177236	20.9031	41.8887	20.2754
rs4876407	T	G	T	G	-0.1391	0.226338	0.9451	0.9591	kidney cancer	0.02227	0.0990223	GCST90274813	8	119274249	0.0299	3.28e-06	8_119274249_T_G	11788	Interleukin-4 levels	0.00183294	0.00200786	23.7123	41.8887	21.6427
rs61984458	T	C	T	C	-0.1955	0.00210221	0.0285	0.02147	kidney cancer	0.9867	0.126108	GCST90274813	14	64861479	0.043	5.45e-06	14_64861479_T_C	11345	Interleukin-4 levels	0.00181902	0.00211647	24.058	41.8887	20.6708
rs669029	A	G	A	G	-0.0699	-0.00239712	0.7524	0.7945	kidney cancer	0.9573	0.0447708	GCST90274813	18	10579314	0.0158	9.69e-06	18_10579314_A_G	11345	Interleukin-4 levels	0.00172252	0.00182047	20.6873	41.8887	19.5722
rs6712163	T	C	T	C	0.0609	0.0179603	0.546	0.6053	kidney cancer	0.6485	0.0393999	GCST90274813	2	43501970	0.0136	7.54e-06	2_43501970_T_C	11344	Interleukin-4 levels	0.00176482	0.00183871	20.8931	41.8887	20.052
rs75610895	T	C	T	C	-0.2354	0.216913	0.0253	0.01534	kidney cancer	0.0604	0.115511	GCST90274813	10	6800809	0.045	1.68e-07	10_6800809_T_C	11787	Interleukin-4 levels	0.0023166	0.00273297	32.2963	41.8887	27.3645
rs7587695	A	C	A	C	0.0598	0.0239854	0.6086	0.589	kidney cancer	0.5466	0.0397858	GCST90274813	2	172513639	0.0134	8.09e-06	2_172513639_A_C	11793	Interleukin-4 levels	0.0016862	0.00170367	20.1222	41.8887	19.9156
rs76678067	T	G	T	G	0.1045	-0.102476	0.9046	0.91309	kidney cancer	0.1165	0.0652864	GCST90274813	15	79597917	0.0231	6.07e-06	15_79597917_T_G	11345	Interleukin-4 levels	0.00180093	0.00188481	21.4198	41.8887	20.4649
rs79359966	A	C	A	C	-0.1552	0.0137056	0.9596	0.96012	kidney cancer	0.8922	0.101133	GCST90274813	8	71370392	0.0345	6.84e-06	8_71370392_A_C	11775	Interleukin-4 levels	0.00171598	0.00186761	22.0285	41.8887	20.237
rs802281	T	G	T	G	-0.1305	-0.0641119	0.9368	0.95399	kidney cancer	0.4142	0.0785181	GCST90274813	6	124516990	0.0294	9.05e-06	6_124516990_T_G	11786	Interleukin-4 levels	0.0016692	0.00201658	23.8114	41.8887	19.7027
rs9270229	T	C	T	C	0.1212	0.0695261	0.1501		kidney cancer	0.2506	0.0605157	GCST90274813	6	32556783	0.0255	2e-06	6_32556783_T_C	6252	Interleukin-4 levels	0.00360145	0.00374786	23.5123	41.8887	22.5904
rs9425728	T	G	T	G	0.0664	-0.0416557	0.2727	0.2863	kidney cancer	0.3387	0.0435393	GCST90274813	1	173492229	0.015	9.57e-06	1_173492229_T_G	11345	Interleukin-4 levels	0.00172455	0.0017489	19.8725	41.8887	19.5954
rs10182644	T	C	T	C	-0.0828	-0.0205089	0.1671	0.1595	kidney cancer	0.704	0.0539812	GCST90274814	2	46461654	0.0186	8.52e-06	2_46461654_T_C	11344	Interleukin-5 levels	0.00174416	0.00190836	21.686	41.8887	19.8169
rs10235012	T	C	T	C	-0.3402	0.114935	0.0162	0.01636	kidney cancer	0.572	0.203385	GCST90274814	7	138588598	0.075	5.73e-06	7_138588598_T_C	7943	Interleukin-5 levels	0.00258433	0.0036891	29.4036	41.8887	20.5753
rs10988407	A	G	A	G	0.0777	0.0442654	0.2002	0.1759	kidney cancer	0.3591	0.0482677	GCST90274814	9	132281601	0.0167	3.28e-06	9_132281601_A_G	11791	Interleukin-5 levels	0.00183289	0.00193338	22.8368	41.8887	21.6476
rs112289272	T	C	T	C	-0.213	0.0660686	0.9743	0.98057	kidney cancer	0.6352	0.139262	GCST90274814	3	126910721	0.0471	6.12e-06	3_126910721_T_C	10905	Interleukin-5 levels	0.00187222	0.00227203	24.8284	41.8887	20.4511
rs114829303	T	C	T	C	0.1661	-0.221542	0.0436	0.04806	kidney cancer	0.1036	0.136112	GCST90274814	1	37473314	0.0361	4.2e-06	1_37473314_T_C	11344	Interleukin-5 levels	0.00186305	0.00230089	26.1568	41.8887	21.1702
rs12592185	T	C	T	C	0.0838	0.0249853	0.8068	0.7843	kidney cancer	0.6201	0.0504031	GCST90274814	15	70546132	0.0173	1.27e-06	15_70546132_T_C	11344	Interleukin-5 levels	0.00206447	0.00218923	24.8847	41.8887	23.4637
rs132210	T	C	T	C	-0.0686	0.0443699	0.3408	0.3313	kidney cancer	0.2798	0.0410541	GCST90274814	22	48143913	0.0141	1.14e-06	22_48143913_T_C	11344	Interleukin-5 levels	0.00208264	0.00211444	24.0328	41.8887	23.6706
rs139303816	A	G	A	G	0.1942	-0.242789	0.0315	0.03885	kidney cancer	0.04443	0.12079	GCST90274814	1	62157502	0.0435	8.03e-06	1_62157502_A_G	9895	Interleukin-5 levels	0.00201056	0.00230112	22.8175	41.8887	19.9306
rs141941146	A	G	A	G	0.3833	-0.459499	0.9859	0.98671	kidney cancer	0.2899	0.434169	GCST90274814	6	124474284	0.0825	3.38e-06	6_124474284_A_G	10280	Interleukin-5 levels	0.0020958	0.0040847	42.1547	41.8887	21.5859
rs144124166	T	G	T	G	0.211	0.0499258	0.0271	0.02249	kidney cancer	0.6939	0.126854	GCST90274814	15	56343222	0.0465	5.69e-06	15_56343222_T_G	11768	Interleukin-5 levels	0.00174691	0.00234765	27.6874	41.8887	20.5901
rs17009223	A	G	A	G	-0.1169	0.0948603	0.0881	0.1012	kidney cancer	0.1499	0.0658805	GCST90274814	1	208050360	0.0236	7.29e-07	1_208050360_A_G	11789	Interleukin-5 levels	0.0020773	0.00219575	25.9382	41.8887	24.5361
rs2212484	T	G	T	G	-0.0732	0.034695	0.2044	0.1933	kidney cancer	0.4699	0.0480113	GCST90274814	11	132275295	0.0162	6.23e-06	11_132275295_T_G	11792	Interleukin-5 levels	0.00172873	0.00174272	20.5825	41.8887	20.417
rs2995998	T	C	T	C	-0.0623	-0.00783058	0.3561	0.362	kidney cancer	0.8471	0.0406108	GCST90274814	9	96094846	0.0137	5.43e-06	9_96094846_T_C	11792	Interleukin-5 levels	0.00175089	0.0017799	21.0225	41.8887	20.6793
rs34639000	A	G	A	G	0.0765	0.0465973	0.7289	0.7382	kidney cancer	0.3089	0.0457944	GCST90274814	5	95530542	0.0147	1.95e-07	5_95530542_A_G	11773	Interleukin-5 levels	0.0022955	0.00231286	27.2879	41.8887	27.0825
rs41264833	A	G	A	G	-0.2117	-0.352908	0.0254	0.01431	kidney cancer	0.04057	0.172327	GCST90274814	1	159897328	0.0468	6.08e-06	1_159897328_A_G	11790	Interleukin-5 levels	0.00173283	0.00221887	26.2142	41.8887	20.4621
rs4277106	A	G	A	G	-0.2747	0.139262	0.9858	0.98875	kidney cancer	0.4207	0.172952	GCST90274814	11	10380223	0.0592	3.48e-06	11_10380223_A_G	11790	Interleukin-5 levels	0.00182323	0.00211263	24.9565	41.8887	21.5315
rs4815018	A	G	A	G	0.0615	0.0215658	0.363	0.3528	kidney cancer	0.5957	0.0406446	GCST90274814	20	2159791	0.0139	9.67e-06	20_2159791_A_G	11344	Interleukin-5 levels	0.00172299	0.00174915	19.8736	41.8887	19.5759
rs62069649	A	G	A	G	0.2206	-0.296171	0.0267	0.02352	kidney cancer	0.0633	0.159482	GCST90274814	17	59402478	0.0482	4.72e-06	17_59402478_A_G	10431	Interleukin-5 levels	0.00200448	0.00252929	26.4449	41.8887	20.9468
rs67927317	T	C	T	C	-0.114	-0.0633503	0.0784	0.07669	kidney cancer	0.3987	0.0750645	GCST90274814	16	6155800	0.0255	7.8e-06	16_6155800_T_C	11344	Interleukin-5 levels	0.00175904	0.00187801	21.3405	41.8887	19.9862
rs706716	T	C	T	C	-0.0708	0.0774211	0.2459	0.2372	kidney cancer	0.08069	0.0443243	GCST90274814	5	67548442	0.0158	7.43e-06	5_67548442_T_C	11344	Interleukin-5 levels	0.00176724	0.00185902	21.1243	41.8887	20.0795
rs7142197	A	G	A	G	-0.0924	-0.0102524	0.1442	0.1401	kidney cancer	0.8511	0.0546167	GCST90274814	14	93316119	0.0188	8.88e-07	14_93316119_A_G	11773	Interleukin-5 levels	0.00204798	0.00210723	24.8566	41.8887	24.1562
rs7193141	C	G	C	G	0.2407	-0.0858107	0.0351	0.02556	kidney cancer	0.8285	0.396124	GCST90274814	16	86933894	0.0521	3.84e-06	16_86933894_C_G	9377	Interleukin-5 levels	0.00227153	0.00392438	36.9361	41.8887	21.344
rs72873944	T	C	T	C	-0.1649	-0.201627	0.9609	0.97137	kidney cancer	0.06684	0.110013	GCST90274814	2	139572732	0.0368	7.43e-06	2_139572732_T_C	11792	Interleukin-5 levels	0.00170017	0.00204327	24.1395	41.8887	20.0792
rs9457226	A	G	A	G	0.1911	0.077979	0.0282	0.02863	kidney cancer	0.5657	0.135758	GCST90274814	6	167250912	0.0429	8.41e-06	6_167250912_A_G	11786	Interleukin-5 levels	0.00168106	0.0020016	23.6342	41.8887	19.843
rs10234370	T	C	T	C	0.0582	-0.037079	0.6371	0.6329	kidney cancer	0.3652	0.0409486	GCST90274815	7	28486167	0.0127	4.59e-06	7_28486167_T_C	14295	Interleukin-6 levels	0.00146716	0.00156628	22.422	41.8887	21.0009
rs10977774	A	C	A	C	-0.3418	-0.149661	0.9865	0.98569	kidney cancer	0.7238	0.423507	GCST90274815	9	954741	0.0701	1.08e-06	9_954741_A_C	12312	Interleukin-6 levels	0.00192758	0.00311175	38.4252	41.8887	23.7743
rs112669397	T	C	T	C	-0.3592	-0.593382	0.0119	0.01227	kidney cancer	0.3944	0.696732	GCST90274815	4	7449788	0.0787	5.01e-06	4_7449788_T_C	10217	Interleukin-6 levels	0.00203517	0.00303424	31.0891	41.8887	20.8316
rs12433894	C	G	C	G	0.063	-0.0018982	0.2257	0.2035	kidney cancer	0.9682	0.0476145	GCST90274815	14	85619189	0.0139	5.83e-06	14_85619189_C_G	14726	Interleukin-6 levels	0.00139322	0.00138724	20.4541	41.8887	20.5424
rs1346147	A	G	A	G	-0.0659	0.0249853	0.7459	0.7689	kidney cancer	0.5823	0.0454254	GCST90274815	8	21260780	0.0135	1.05e-06	8_21260780_A_G	14295	Interleukin-6 levels	0.00166439	0.00164621	23.5681	41.8887	23.8289
rs17486819	T	G	T	G	0.0975	0.0346912	0.9152	0.92536	kidney cancer	0.6366	0.0734272	GCST90274815	2	113871806	0.0211	3.82e-06	2_113871806_T_G	14739	Interleukin-6 levels	0.00144679	0.00147554	21.7772	41.8887	21.3523
rs187416244	T	C	T	C	-0.2244	0.250515	0.0182	0.01943	kidney cancer	0.06782	0.137178	GCST90274815	7	76792340	0.0469	1.71e-06	7_76792340_T_C	14726	Interleukin-6 levels	0.00155239	0.00179958	26.5447	41.8887	22.8929
rs2228145	A	C	A	C	-0.1684	0.0356567	0.6128	0.6462	kidney cancer	0.3675	0.0395673	GCST90274815	1	154426970	0.0119	1.83e-45	1_154426970_A_C	14742	Interleukin-6 levels	0.0134039	0.0134576	201.071	41.8887	200.258
rs248536	T	G	T	G	-0.0671	-0.0211215	0.2276	0.2249	kidney cancer	0.6556	0.047358	GCST90274815	5	141146747	0.0143	2.7e-06	5_141146747_T_G	14295	Interleukin-6 levels	0.00153809	0.00158303	22.6621	41.8887	22.0178
rs35441559	A	C	A	C	-0.2484	-0.0498207	0.9868	0.98364	kidney cancer	0.7744	0.173819	GCST90274815	18	73432128	0.0553	7.06e-06	18_73432128_A_C	14740	Interleukin-6 levels	0.00136716	0.00160745	23.7287	41.8887	20.1768
rs76203502	A	G	A	G	-0.2492	0.415515	0.017	0.01534	kidney cancer	0.01463	0.170195	GCST90274815	10	127845552	0.0557	7.68e-06	10_127845552_A_G	12634	Interleukin-6 levels	0.00158207	0.00207553	26.2726	41.8887	20.0164
rs79254378	A	C	A	C	0.1173	-0.0181346	0.0664	0.06135	kidney cancer	0.8241	0.0815863	GCST90274815	19	58504085	0.0262	7.57e-06	19_58504085_A_C	14295	Interleukin-6 levels	0.00140043	0.0017059	24.4242	41.8887	20.0444
rs10403201	A	G	A	G	-0.0584	0.00461061	0.2923	0.3037	kidney cancer	0.9121	0.0417665	GCST90274816	19	14764810	0.0127	4.26e-06	19_14764810_A_G	14730	Interleukin-7 levels	0.00143368	0.00141102	20.8109	41.8887	21.1455
rs1050152	T	C	T	C	-0.0651	-0.0532564	0.4122	0.3896	kidney cancer	0.1755	0.0393111	GCST90274816	5	131676320	0.0133	9.84e-07	5_131676320_T_C	11785	Interleukin-7 levels	0.00202918	0.00205367	24.2481	41.8887	23.9584
rs10734292	A	G	A	G	0.1208	-0.0594316	0.067	0.06851	kidney cancer	0.4645	0.081251	GCST90274816	11	20486401	0.0267	6.06e-06	11_20486401_A_G	11776	Interleukin-7 levels	0.00173553	0.0018244	21.5198	41.8887	20.4697
rs11158239	T	G	T	G	0.0965	-0.048028	0.0814	0.08896	kidney cancer	0.501	0.0713728	GCST90274816	14	59452945	0.0217	8.71e-06	14_59452945_T_G	14288	Interleukin-7 levels	0.00138237	0.00139263	19.9228	41.8887	19.7758
rs11171132	T	C	T	C	-0.0724	0.041046	0.8342	0.8446	kidney cancer	0.4439	0.0536111	GCST90274816	12	55251385	0.0163	8.92e-06	12_55251385_T_C	14288	Interleukin-7 levels	0.00137909	0.00144998	20.7445	41.8887	19.7289
rs112359206	A	G	A	G	0.1691	0.00876151	0.9	0.8916	kidney cancer	0.9085	0.0762329	GCST90274816	8	79713766	0.0225	5.67e-14	8_79713766_A_G	10894	Interleukin-7 levels	0.00515903	0.00514707	56.3519	41.8887	56.4836
rs116415547	T	G	T	G	0.2093	0.0994889	0.0198	0.01125	kidney cancer	0.4799	0.140827	GCST90274816	4	110732727	0.046	5.36e-06	4_110732727_T_G	13870	Interleukin-7 levels	0.0014906	0.00170039	23.6212	41.8887	20.7025
rs11742240	T	G	T	G	-0.0647	0.076989	0.2796	0.2751	kidney cancer	0.07236	0.0428468	GCST90274816	5	35881376	0.0131	7.86e-07	5_35881376_T_G	14736	Interleukin-7 levels	0.00165282	0.00168636	24.8888	41.8887	24.393
rs12217463	T	C	T	C	-0.1374	0.145744	0.9572	0.96933	kidney cancer	0.2263	0.120455	GCST90274816	10	16318694	0.031	9.33e-06	10_16318694_T_C	14736	Interleukin-7 levels	0.00133153	0.00154686	22.8267	41.8887	19.6449
rs12321566	A	G	A	G	0.0698	-0.0281014	0.237	0.2628	kidney cancer	0.5389	0.0457323	GCST90274816	12	97807415	0.0139	5.12e-07	12_97807415_A_G	14287	Interleukin-7 levels	0.00176212	0.00176203	25.2151	41.8887	25.2163
rs12699881	A	G	A	G	0.068	-0.0152826	0.2517	0.2546	kidney cancer	0.7403	0.0461075	GCST90274816	7	2401569	0.0138	8.33e-07	7_2401569_A_G	14288	Interleukin-7 levels	0.00169673	0.00174183	24.9273	41.8887	24.2806
rs144728120	T	C	T	C	0.1495	-0.0532564	0.0436	0.04703	kidney cancer	0.5908	0.099049	GCST90274816	3	35502404	0.0316	2.23e-06	3_35502404_T_C	14717	Interleukin-7 levels	0.00151876	0.00186397	27.4795	41.8887	22.3825
rs17161952	T	C	T	C	0.0929	-0.0536118	0.9031	0.8916	kidney cancer	0.4531	0.0714579	GCST90274816	1	223649878	0.0204	5.27e-06	1_223649878_T_C	14734	Interleukin-7 levels	0.00140572	0.0015105	22.2864	41.8887	20.7382
rs55849454	A	G	A	G	0.0729	0.10454	0.7913	0.8108	kidney cancer	0.05666	0.0548501	GCST90274816	5	133897234	0.0159	4.54e-06	5_133897234_A_G	12202	Interleukin-7 levels	0.0017201	0.00175529	21.4522	41.8887	21.0214
rs570880779	T	C	T	C	-0.2336	0.280905	0.0215	0.01227	kidney cancer	0.08595	0.163587	GCST90274816	15	73960703	0.0505	3.73e-06	15_73960703_T_C	13605	Interleukin-7 levels	0.00157053	0.00229602	31.3046	41.8887	21.3975
rs576004227	A	T	A	T	0.1597	0.0742722	0.9615	0.96421	kidney cancer	0.5038	0.111099	GCST90274816	4	147865967	0.0345	3.67e-06	4_147865967_A_T	12045	Interleukin-7 levels	0.00177609	0.00188821	22.7827	41.8887	21.4275
rs62338232	A	G	A	G	-0.0813	-0.090663	0.1357	0.137	kidney cancer	0.1293	0.0597699	GCST90274816	4	185760185	0.018	6.28e-06	4_185760185_A_G	14288	Interleukin-7 levels	0.00142596	0.00155044	22.184	41.8887	20.4003
rs62387962	T	G	T	G	-0.078	-0.00409162	0.1347	0.1166	kidney cancer	0.9411	0.0553764	GCST90274816	5	157298830	0.0176	9.34e-06	5_157298830_T_G	14288	Interleukin-7 levels	0.00137296	0.00141825	20.2899	41.8887	19.641
rs74131483	A	G	A	G	0.1372	-0.0730009	0.9451	0.9274	kidney cancer	0.3458	0.0774326	GCST90274816	1	194276216	0.0274	5.52e-07	1_194276216_A_G	13240	Interleukin-7 levels	0.00189044	0.00195339	25.9096	41.8887	25.073
rs76213792	T	G	T	G	-0.2791	0.276544	0.0113	0.01431	kidney cancer	0.1528	0.193427	GCST90274816	12	17798114	0.0616	5.87e-06	12_17798114_T_G	14288	Interleukin-7 levels	0.00143491	0.00174058	24.9092	41.8887	20.5285
rs77336315	A	C	A	C	0.2512	0.0509782	0.9836	0.9816	kidney cancer	0.7845	0.18642	GCST90274816	1	97287518	0.0531	2.24e-06	1_97287518_A_C	13801	Interleukin-7 levels	0.00161919	0.00203578	28.1491	41.8887	22.3795
rs78939185	C	G	C	G	0.2134	-0.0466927	0.0211	0.02965	kidney cancer	0.743	0.142407	GCST90274816	7	129478199	0.0481	9.14e-06	7_129478199_C_G	11775	Interleukin-7 levels	0.00166911	0.00188122	22.1893	41.8887	19.6833
rs79072837	T	C	T	C	-0.136	0.0412387	0.0497	0.06748	kidney cancer	0.6627	0.0945434	GCST90274816	15	81321256	0.028	1.19e-06	15_81321256_T_C	14715	Interleukin-7 levels	0.0016009	0.00174713	25.7505	41.8887	23.5918
rs11712240	T	C	T	C	0.0932	0.0525573	0.1151	0.1135	kidney cancer	0.4002	0.0624741	GCST90274817	3	132203683	0.0206	6.06e-06	3_132203683_T_C	11777	Interleukin-8 levels	0.00173533	0.00176942	20.8719	41.8887	20.469
rs12075	A	G	A	G	0.0667	-0.0557185	0.5552	0.6053	kidney cancer	0.1542	0.0391048	GCST90274817	1	159175354	0.0116	8.92e-09	1_159175354_A_G	14741	Interleukin-8 levels	0.00223818	0.00219733	32.4578	41.8887	33.0625
rs12188297	A	T	A	T	-0.0755	-0.0569473	0.2006	0.2014	kidney cancer	0.2557	0.0501026	GCST90274817	5	120608739	0.0147	2.81e-07	5_120608739_A_T	14740	Interleukin-8 levels	0.00178667	0.00182818	26.9931	41.8887	26.3791
rs12217463	T	C	T	C	-0.1365	0.145744	0.9559	0.96933	kidney cancer	0.2263	0.120455	GCST90274817	10	16318694	0.0308	9.34e-06	10_16318694_T_C	14744	Interleukin-8 levels	0.00133054	0.00157089	23.1945	41.8887	19.641
rs13064825	T	C	T	C	0.056	-0.0309171	0.4104	0.3916	kidney cancer	0.4431	0.0403108	GCST90274817	3	16705058	0.012	3.06e-06	3_16705058_T_C	14296	Interleukin-8 levels	0.00152124	0.00151765	21.7262	41.8887	21.7778
rs141979722	T	C	T	C	0.2829	0.0775292	0.0146	0.01534	kidney cancer	0.6395	0.16552	GCST90274817	3	172877373	0.0608	3.27e-06	3_172877373_T_C	11669	Interleukin-8 levels	0.00185223	0.00230283	26.9291	41.8887	21.65
rs144815207	T	C	T	C	0.3186	-0.151986	0.9879	0.98978	kidney cancer	0.4119	0.185224	GCST90274817	1	233542010	0.0622	3.02e-07	1_233542010_T_C	13394	Interleukin-8 levels	0.00195531	0.00242672	32.5777	41.8887	26.2368
rs145125644	A	G	A	G	0.2687	-0.224144	0.9866	0.98364	kidney cancer	0.1972	0.173813	GCST90274817	7	17688229	0.0555	1.29e-06	7_17688229_A_G	14733	Interleukin-8 levels	0.00158864	0.00190902	28.1756	41.8887	23.4396
rs1516478	T	C	T	C	0.1479	0.0551956	0.0386	0.03374	kidney cancer	0.6193	0.111093	GCST90274817	3	76218188	0.0322	4.37e-06	3_76218188_T_C	14741	Interleukin-8 levels	0.00142934	0.00162352	23.968	41.8887	21.0972
rs1582581	A	G	A	G	-0.0541	0.0427721	0.393	0.3885	kidney cancer	0.2816	0.039724	GCST90274817	16	60551242	0.0119	5.46e-06	16_60551242_A_G	14730	Interleukin-8 levels	0.00140135	0.00139639	20.5947	41.8887	20.6681
rs1988503	T	C	T	C	0.0548	0.0362355	0.5814	0.5706	kidney cancer	0.3636	0.0398838	GCST90274817	17	11189278	0.0121	5.93e-06	17_11189278_T_C	14296	Interleukin-8 levels	0.00143289	0.00146172	20.9245	41.8887	20.5112
rs2466352	C	G	C	G	-0.0957	-0.110596	0.9125	0.93354	kidney cancer	0.1341	0.0738231	GCST90274817	8	133415401	0.0212	6.36e-06	8_133415401_C_G	14730	Interleukin-8 levels	0.00138168	0.0014625	21.5712	41.8887	20.3776
rs34519991	T	C	T	C	0.0555	-0.0686862	0.5073	0.4908	kidney cancer	0.1239	0.0446418	GCST90274817	18	12258051	0.012	3.75e-06	18_12258051_T_C	14296	Interleukin-8 levels	0.00149424	0.0015398	22.0438	41.8887	21.3906
rs4769882	T	C	T	C	-0.1103	0.169958	0.94	0.94785	kidney cancer	0.0554	0.0887174	GCST90274817	13	31352538	0.0249	9.44e-06	13_31352538_T_C	14744	Interleukin-8 levels	0.00132928	0.00137233	20.2588	41.8887	19.6224
rs6446951	A	G	A	G	-0.1894	0.120813	0.0665	0.0593	kidney cancer	0.1272	0.0792091	GCST90274817	4	74574265	0.0241	3.87e-15	4_74574265_A_G	14729	Interleukin-8 levels	0.00417632	0.00445375	65.8838	41.8887	61.7626
rs6585420	T	C	T	C	0.1545	-0.107251	0.9598	0.9683	kidney cancer	0.3558	0.116148	GCST90274817	10	118629449	0.0325	2e-06	10_118629449_T_C	14744	Interleukin-8 levels	0.00153062	0.00184202	27.2051	41.8887	22.5991
rs6709159	A	G	A	G	0.0562	0.0329511	0.4424	0.4519	kidney cancer	0.3981	0.0389945	GCST90274817	2	108946178	0.0117	1.56e-06	2_108946178_A_G	14744	Interleukin-8 levels	0.00156266	0.00155826	23.0078	41.8887	23.0728
rs71337505	A	G	A	G	0.0948	-0.0106432	0.1019	0.07362	kidney cancer	0.878	0.0693343	GCST90274817	19	34248514	0.0209	5.74e-06	19_34248514_A_G	14563	Interleukin-8 levels	0.00141098	0.00164492	23.9912	41.8887	20.5743
rs7216538	A	G	A	G	-0.1324	-0.174205	0.0541	0.06135	kidney cancer	0.06944	0.095952	GCST90274817	17	73572798	0.0279	2.08e-06	17_73572798_A_G	13672	Interleukin-8 levels	0.00164469	0.00179411	24.5695	41.8887	22.52
rs72710634	T	C	T	C	0.1432	-0.0041912	0.0447	0.03783	kidney cancer	0.9708	0.114498	GCST90274817	5	2106405	0.0322	8.7e-06	5_2106405_T_C	14744	Interleukin-8 levels	0.00133979	0.00175131	25.8631	41.8887	19.7776
rs75579654	A	G	A	G	0.1025	0.0248051	0.0739	0.06851	kidney cancer	0.759	0.0808526	GCST90274817	1	46373240	0.0231	9.11e-06	1_46373240_A_G	14728	Interleukin-8 levels	0.00133524	0.00143807	21.2075	41.8887	19.689
rs76149515	T	C	T	C	-0.1546	-0.0910194	0.9689	0.97648	kidney cancer	0.3915	0.106219	GCST90274817	16	4804879	0.0348	8.89e-06	16_4804879_T_C	14741	Interleukin-8 levels	0.00133725	0.00144042	21.2609	41.8887	19.7361
rs8069322	A	G	A	G	0.0668	0.00240289	0.7222	0.7597	kidney cancer	0.9551	0.0426773	GCST90274817	17	54450134	0.0131	3.41e-07	17_54450134_A_G	14726	Interleukin-8 levels	0.00176286	0.00179049	26.4105	41.8887	26.0022
rs906401	T	C	T	C	0.0941	0.02985	0.9034	0.92536	kidney cancer	0.6516	0.0661071	GCST90274817	18	73700336	0.02	2.54e-06	18_73700336_T_C	14729	Interleukin-8 levels	0.0015009	0.00154549	22.7957	41.8887	22.137
rs972492	A	C	A	C	-0.0936	-0.0886127	0.1404	0.1329	kidney cancer	0.1365	0.0595134	GCST90274817	5	37903927	0.0184	3.64e-07	5_37903927_A_C	12412	Interleukin-8 levels	0.00208085	0.00211468	26.2988	41.8887	25.8771
rs10403201	A	G	A	G	-0.0597	0.00461061	0.292	0.3037	kidney cancer	0.9121	0.0417665	GCST90274818	19	14764810	0.0125	1.79e-06	19_14764810_A_G	14730	Latency-associated peptide transforming growth factor beta 1 levels	0.00154637	0.00147365	21.736	41.8887	22.8102
rs10508556	T	C	T	C	0.0523	0.0670977	0.4627	0.4325	kidney cancer	0.08462	0.0389088	GCST90274818	10	18285342	0.0114	4.48e-06	10_18285342_T_C	14735	Latency-associated peptide transforming growth factor beta 1 levels	0.00142654	0.00136003	20.0647	41.8887	21.0472
rs111848253	A	G	A	G	-0.1111	-0.0915672	0.9044	0.91002	kidney cancer	0.5669	0.159908	GCST90274818	11	22351553	0.0251	9.59e-06	11_22351553_A_G	11538	Latency-associated peptide transforming growth factor beta 1 levels	0.00169546	0.0021344	24.6751	41.8887	19.5921
rs114152855	T	C	T	C	-0.299	-0.0317893	0.0112	0.01329	kidney cancer	0.866	0.188391	GCST90274818	4	175537640	0.0613	1.07e-06	4_175537640_T_C	14249	Latency-associated peptide transforming growth factor beta 1 levels	0.00166715	0.00198015	28.2672	41.8887	23.7915
rs143420877	T	C	T	C	0.1447	0.0466724	0.0388	0.04192	kidney cancer	0.6569	0.105071	GCST90274818	8	51696312	0.0303	1.79e-06	8_51696312_T_C	14729	Latency-associated peptide transforming growth factor beta 1 levels	0.0015462	0.00156175	23.0359	41.8887	22.8061
rs144834546	T	C	T	C	-0.2662	0.324484	0.0227	0.01431	kidney cancer	0.006816	0.119926	GCST90274818	12	24809427	0.0526	4.17e-07	12_24809427_T_C	12935	Latency-associated peptide transforming growth factor beta 1 levels	0.00197645	0.00314412	40.7912	41.8887	25.6121
rs149458216	A	C	A	C	-0.2301	-0.122041	0.0182	0.01125	kidney cancer	0.4565	0.163896	GCST90274818	16	48902293	0.0472	1.09e-06	16_48902293_A_C	14726	Latency-associated peptide transforming growth factor beta 1 levels	0.00161147	0.00189216	27.913	41.8887	23.7656
rs1800472	A	G	A	G	-0.4623	0.218156	0.0345	0.03067	kidney cancer	0.08165	0.125291	GCST90274818	19	41847860	0.0335	2.55e-43	19_41847860_A_G	14736	Latency-associated peptide transforming growth factor beta 1 levels	0.0127603	0.014238	212.813	41.8887	190.44
rs183319799	T	G	T	G	0.2185	-0.0935814	0.0182	0.01125	kidney cancer	0.5435	0.154036	GCST90274818	9	87111083	0.0461	2.14e-06	9_87111083_T_G	14733	Latency-associated peptide transforming growth factor beta 1 levels	0.00152267	0.00170619	25.1768	41.8887	22.4647
rs1921885	A	C	A	C	0.1265	-0.0809346	0.9391	0.95092	kidney cancer	0.3185	0.0811338	GCST90274818	4	84952443	0.0263	1.51e-06	4_84952443_A_C	14288	Latency-associated peptide transforming growth factor beta 1 levels	0.0016168	0.00183037	26.1967	41.8887	23.135
rs201799031	C	G	C	G	0.1918	0.173197	0.9725	0.97648	kidney cancer	0.3072	0.169615	GCST90274818	7	113796203	0.0427	7.06e-06	7_113796203_C_G	11760	Latency-associated peptide transforming growth factor beta 1 levels	0.00171302	0.00196766	23.1813	41.8887	20.1763
rs2281119	T	C	T	C	-0.0873	-0.0329511	0.1204	0.1247	kidney cancer	0.6547	0.0736761	GCST90274818	22	45002724	0.019	4.33e-06	22_45002724_T_C	14284	Latency-associated peptide transforming growth factor beta 1 levels	0.00147602	0.00161425	23.092	41.8887	21.1116
rs2365502	A	G	A	G	0.1321	0.00359354	0.9369	0.94581	kidney cancer	0.9703	0.0965173	GCST90274818	7	156395495	0.029	5.23e-06	7_156395495_A_G	11777	Latency-associated peptide transforming growth factor beta 1 levels	0.00175907	0.00206328	24.3454	41.8887	20.7496
rs2525703	T	C	T	C	0.0668	-0.0376811	0.1815	0.1544	kidney cancer	0.4636	0.0514114	GCST90274818	7	144100595	0.0151	9.7e-06	7_144100595_T_C	14723	Latency-associated peptide transforming growth factor beta 1 levels	0.00132765	0.0013258	19.543	41.8887	19.5704
rs34536806	T	G	T	G	0.0989	0.0187236	0.9023	0.90798	kidney cancer	0.7909	0.0706173	GCST90274818	11	95274487	0.021	2.48e-06	11_95274487_T_G	14288	Latency-associated peptide transforming growth factor beta 1 levels	0.00155014	0.00172452	24.679	41.8887	22.1796
rs34992551	T	C	T	C	-0.0931	0.043534	0.1103	0.1135	kidney cancer	0.5487	0.0725918	GCST90274818	7	16406570	0.0199	2.89e-06	7_16406570_T_C	14734	Latency-associated peptide transforming growth factor beta 1 levels	0.0014835	0.00170117	25.1044	41.8887	21.8874
rs371119188	T	C	T	C	0.1588	-0.0661622	0.0406	0.0409	kidney cancer	0.577	0.118619	GCST90274818	13	112876202	0.0358	9.18e-06	13_112876202_T_C	12189	Latency-associated peptide transforming growth factor beta 1 levels	0.0016119	0.00196452	23.9887	41.8887	19.6759
rs4659810	A	G	A	G	-0.0551	-0.0458334	0.3438	0.3732	kidney cancer	0.2665	0.0412483	GCST90274818	1	237983229	0.0121	5.27e-06	1_237983229_A_G	14710	Latency-associated peptide transforming growth factor beta 1 levels	0.00140788	0.00136986	20.1755	41.8887	20.7364
rs4911055	T	C	T	C	-0.0607	0.0134097	0.6556	0.635	kidney cancer	0.7458	0.0413646	GCST90274818	13	85826913	0.0137	9.39e-06	13_85826913_T_C	11783	Latency-associated peptide transforming growth factor beta 1 levels	0.00166353	0.00166383	19.6343	41.8887	19.6307
rs4919925	T	C	T	C	0.0561	0.0332466	0.3696	0.3691	kidney cancer	0.473	0.0463298	GCST90274818	21	43119625	0.0124	6.06e-06	21_43119625_T_C	14287	Latency-associated peptide transforming growth factor beta 1 levels	0.0014308	0.00146657	20.9808	41.8887	20.4683
rs56025355	T	C	T	C	0.3006	0.00120072	0.0106	0.01534	kidney cancer	0.9952	0.19959	GCST90274818	17	62499163	0.0666	6.38e-06	17_62499163_T_C	12968	Latency-associated peptide transforming growth factor beta 1 levels	0.00156871	0.00189533	24.6216	41.8887	20.3718
rs560709031	A	G	A	G	-0.2819	0.0882849	0.0141	0.0184	kidney cancer	0.6257	0.18099	GCST90274818	2	121864864	0.0626	6.69e-06	2_121864864_A_G	10407	Latency-associated peptide transforming growth factor beta 1 levels	0.00194515	0.00220939	23.0396	41.8887	20.2788
rs58801460	A	G	A	G	0.0964	0.0838165	0.081	0.06135	kidney cancer	0.2923	0.079591	GCST90274818	5	11362066	0.0216	8.08e-06	5_11362066_A_G	14736	Latency-associated peptide transforming growth factor beta 1 levels	0.00135002	0.00138352	20.413	41.8887	19.918
rs60821320	A	C	A	C	-0.1083	0.0688143	0.0779	0.08078	kidney cancer	0.3119	0.0680492	GCST90274818	12	95312882	0.0232	3.04e-06	12_95312882_A_C	12852	Latency-associated peptide transforming growth factor beta 1 levels	0.00169294	0.00168501	21.6889	41.8887	21.7912
rs6827317	A	G	A	G	0.2159	0.0877389	0.0172	0.01534	kidney cancer	0.5542	0.148338	GCST90274818	4	10683051	0.048	6.86e-06	4_10683051_A_G	14736	Latency-associated peptide transforming growth factor beta 1 levels	0.00137122	0.0015759	23.256	41.8887	20.2313
rs7013321	A	G	A	G	-0.0608	-0.138892	0.4469	0.4683	kidney cancer	0.08446	0.0804996	GCST90274818	8	106593558	0.0121	5.04e-07	8_106593558_A_G	14288	Latency-associated peptide transforming growth factor beta 1 levels	0.00176425	0.00182747	26.1551	41.8887	25.2485
rs7247630	T	C	T	C	0.1378	-0.066033	0.0525	0.04397	kidney cancer	0.5027	0.0985203	GCST90274818	19	41981195	0.0271	3.68e-07	19_41981195_T_C	14729	Latency-associated peptide transforming growth factor beta 1 levels	0.0017526	0.00188915	27.8742	41.8887	25.8559
rs73045256	A	G	A	G	-0.1921	-0.118446	0.9378	0.94479	kidney cancer	0.1469	0.0816547	GCST90274818	19	41811072	0.0276	3.4e-12	19_41811072_A_G	14288	Latency-associated peptide transforming growth factor beta 1 levels	0.00337952	0.00430512	61.7689	41.8887	48.4436
rs73112514	C	G	C	G	0.2053	-0.138343	0.9689	0.96421	kidney cancer	0.2599	0.122794	GCST90274818	4	26142254	0.0433	2.12e-06	4_26142254_C_G	12393	Latency-associated peptide transforming growth factor beta 1 levels	0.00181096	0.00254008	31.5543	41.8887	22.4803
rs734515	A	G	A	G	-0.0594	0.00299551	0.7486	0.7382	kidney cancer	0.9461	0.0443089	GCST90274818	17	9112300	0.0133	7.96e-06	17_9112300_A_G	14715	Latency-associated peptide transforming growth factor beta 1 levels	0.00135388	0.00132806	19.5657	41.8887	19.9466
rs7570818	A	G	A	G	-0.0849	-0.063579	0.8857	0.8732	kidney cancer	0.2923	0.0603738	GCST90274818	2	107310081	0.0183	3.5e-06	2_107310081_A_G	14729	Latency-associated peptide transforming growth factor beta 1 levels	0.00145937	0.00145941	21.5242	41.8887	21.5235
rs7656674	A	T	A	T	0.0626	-0.0216323	0.5957	0.6247	kidney cancer	0.5864	0.0397609	GCST90274818	4	5793052	0.0121	2.3e-07	4_5793052_A_T	14288	Latency-associated peptide transforming growth factor beta 1 levels	0.00187006	0.0018876	27.0173	41.8887	26.7657
rs7820135	T	C	T	C	-0.0747	0.0815355	0.8321	0.8456	kidney cancer	0.1427	0.0556249	GCST90274818	8	68719454	0.0155	1.44e-06	8_68719454_T_C	14730	Latency-associated peptide transforming growth factor beta 1 levels	0.00157453	0.00155918	22.9995	41.8887	23.2262
rs10152968	A	G	A	G	0.0678	-0.0355236	0.7664	0.7812	kidney cancer	0.4359	0.0455936	GCST90274819	15	60604436	0.0153	9.36e-06	15_60604436_A_G	11792	Leukemia inhibitory factor levels	0.0016628	0.00164595	19.4378	41.8887	19.6371
rs11127419	T	C	T	C	0.0707	-0.0657877	0.3559	0.3671	kidney cancer	0.1584	0.0466423	GCST90274819	2	3091471	0.0153	3.82e-06	2_3091471_T_C	9252	Leukemia inhibitory factor levels	0.0023031	0.00229166	21.2465	41.8887	21.3529
rs111417524	T	C	T	C	0.3026	0.106361	0.0139	0.01125	kidney cancer	0.6207	0.214932	GCST90274819	7	52054682	0.0674	7.14e-06	7_52054682_T_C	10701	Leukemia inhibitory factor levels	0.00188043	0.00251017	26.9239	41.8887	20.1566
rs11608349	A	T	A	T	-0.3084	-0.0577027	0.0168	0.01125	kidney cancer	0.7482	0.179752	GCST90274819	12	68026044	0.0661	3.08e-06	12_68026044_A_T	9362	Leukemia inhibitory factor levels	0.00232028	0.00314203	29.5021	41.8887	21.7684
rs116794364	C	G	C	G	-0.3015	-0.172213	0.9851	0.9816	kidney cancer	0.3264	0.175478	GCST90274819	2	224292526	0.0631	1.77e-06	2_224292526_C_G	10858	Leukemia inhibitory factor levels	0.00209862	0.00266853	29.047	41.8887	22.8305
rs117675814	T	C	T	C	-0.2448	-0.216884	0.018	0.01125	kidney cancer	0.2448	0.186475	GCST90274819	7	67523386	0.0544	6.8e-06	7_67523386_T_C	11345	Leukemia inhibitory factor levels	0.00178206	0.00211854	24.0816	41.8887	20.25
rs117844161	A	G	A	G	0.1842	0.0018982	0.9695	0.97035	kidney cancer	0.9877	0.123129	GCST90274819	13	88387973	0.0408	6.34e-06	13_88387973_A_G	11781	Leukemia inhibitory factor levels	0.00172743	0.00200658	23.6831	41.8887	20.3826
rs11883375	A	G	A	G	-0.1011	-0.00985132	0.1385	0.138	kidney cancer	0.8764	0.0633385	GCST90274819	19	54851842	0.0197	2.87e-07	19_54851842_A_G	11776	Leukemia inhibitory factor levels	0.0022319	0.00243914	28.7887	41.8887	26.3372
rs12595568	T	G	T	G	-0.0652	0.0419094	0.2544	0.2454	kidney cancer	0.3434	0.044233	GCST90274819	15	38990803	0.0146	7.98e-06	15_38990803_T_G	11792	Leukemia inhibitory factor levels	0.00168866	0.00161268	19.0442	41.8887	19.943
rs13105239	A	C	A	C	0.0575	-0.00904074	0.5333	0.5358	kidney cancer	0.8163	0.0389173	GCST90274819	4	23472007	0.013	9.73e-06	4_23472007_A_C	11766	Leukemia inhibitory factor levels	0.00166025	0.00164579	19.393	41.8887	19.5636
rs1348602	T	G	T	G	-0.0782	0.103729	0.2297	0.2321	kidney cancer	0.02267	0.0455162	GCST90274819	13	35704767	0.0173	6.18e-06	13_35704767_T_G	9023	Leukemia inhibitory factor levels	0.00225987	0.00216404	19.5641	41.8887	20.4325
rs142330159	A	T	A	T	0.1155	-0.105351	0.0986	0.08487	kidney cancer	0.1699	0.0767567	GCST90274819	5	171514639	0.0258	7.58e-06	5_171514639_A_T	9436	Leukemia inhibitory factor levels	0.00211986	0.00237131	22.4241	41.8887	20.0412
rs145344087	C	G	C	G	0.2548	-0.198523	0.021	0.02249	kidney cancer	0.2087	0.157915	GCST90274819	3	58954742	0.0556	4.59e-06	3_58954742_C_G	10281	Leukemia inhibitory factor levels	0.00203898	0.00266951	27.5133	41.8887	21.0014
rs147461732	A	G	A	G	0.2606	0.046882	0.0179	0.01431	kidney cancer	0.7863	0.172921	GCST90274819	15	80114266	0.0583	7.82e-06	15_80114266_A_G	11345	Leukemia inhibitory factor levels	0.00175841	0.00238774	27.149	41.8887	19.9807
rs150843753	T	G	T	G	0.1742	0.299141	0.9676	0.96217	kidney cancer	0.2613	0.2663	GCST90274819	16	78805709	0.0385	6.05e-06	16_78805709_T_G	11779	Leukemia inhibitory factor levels	0.00173534	0.00190269	22.4507	41.8887	20.4727
rs1534627	T	C	T	C	0.06	0.0497421	0.5978	0.5736	kidney cancer	0.2161	0.040213	GCST90274819	10	13969539	0.0132	5.48e-06	10_13969539_T_C	11791	Leukemia inhibitory factor levels	0.00174951	0.00173113	20.4437	41.8887	20.6612
rs234592	A	G	A	G	-0.0635	-0.0293646	0.5456	0.5204	kidney cancer	0.4526	0.0390961	GCST90274819	14	97087097	0.0136	3.02e-06	14_97087097_A_G	11345	Leukemia inhibitory factor levels	0.00191826	0.00199936	22.7241	41.8887	21.8007
rs332426	A	G	A	G	0.112	-0.0570417	0.0899	0.1278	kidney cancer	0.3984	0.0675464	GCST90274819	19	6801966	0.0238	2.53e-06	19_6801966_A_G	11789	Leukemia inhibitory factor levels	0.00187527	0.00205265	24.2443	41.8887	22.1453
rs4326609	A	T	A	T	-0.0707	-0.0666741	0.7435	0.7607	kidney cancer	0.1277	0.0437714	GCST90274819	1	244347370	0.0155	5.08e-06	1_244347370_A_T	11345	Leukemia inhibitory factor levels	0.00183084	0.0019065	21.6668	41.8887	20.8054
rs4699986	T	G	T	G	0.0629	0.0119286	0.6927	0.7004	kidney cancer	0.7767	0.042058	GCST90274819	5	61150440	0.0139	6.03e-06	5_61150440_T_G	11792	Leukemia inhibitory factor levels	0.00173382	0.00168438	19.8923	41.8887	20.4773
rs62213023	T	C	T	C	-0.1676	-0.227454	0.0399	0.03681	kidney cancer	0.04524	0.11359	GCST90274819	21	43995327	0.0374	7.42e-06	21_43995327_T_C	11345	Leukemia inhibitory factor levels	0.00176729	0.00215212	24.4642	41.8887	20.0819
rs7225483	T	G	T	G	0.0671	0.0424846	0.486	0.4622	kidney cancer	0.2736	0.0388055	GCST90274819	17	28341679	0.0143	2.7e-06	17_28341679_T_G	9849	Leukemia inhibitory factor levels	0.002231	0.00224944	22.2002	41.8887	22.0178
rs74992559	A	G	A	G	0.1725	-0.0164637	0.0351	0.03988	kidney cancer	0.8863	0.115141	GCST90274819	10	31490202	0.0367	2.6e-06	10_31490202_A_G	11784	Leukemia inhibitory factor levels	0.0018716	0.00201557	23.7954	41.8887	22.0926
rs80092539	A	T	A	T	0.0993	0.0681258	0.8758	0.8773	kidney cancer	0.2505	0.0592844	GCST90274819	2	46125903	0.0213	3.13e-06	2_46125903_A_T	11345	Leukemia inhibitory factor levels	0.00191241	0.00214514	24.3846	41.8887	21.734
rs825264	A	G	A	G	-0.2119	0.225541	0.0321	0.02454	kidney cancer	0.0928	0.134186	GCST90274819	2	222585468	0.0453	2.9e-06	2_222585468_A_G	10291	Leukemia inhibitory factor levels	0.00212212	0.00279015	28.7882	41.8887	21.8809
rs9482537	C	G	C	G	0.1084	-0.0746158	0.9095	0.909	kidney cancer	0.2844	0.0697026	GCST90274819	6	124651086	0.0243	8.16e-06	6_124651086_C_G	11345	Leukemia inhibitory factor levels	0.00175128	0.00193437	21.9841	41.8887	19.8997
rs9648464	T	C	T	C	0.0606	0.0880665	0.4384	0.4397	kidney cancer	0.02523	0.0393529	GCST90274819	7	4467714	0.0135	7.16e-06	7_4467714_T_C	11345	Leukemia inhibitory factor levels	0.00177329	0.00180831	20.5488	41.8887	20.1501
rs112883732	A	G	A	G	0.0639	0.0740772	0.2266	0.2301	kidney cancer	0.1032	0.0454591	GCST90274820	2	174802976	0.0144	9.1e-06	2_174802976_A_G	11784	Leukemia inhibitory factor receptor levels	0.00166852	0.00143118	16.8864	41.8887	19.6914
rs115938660	T	C	T	C	-0.2181	0.0912385	0.0215	0.01431	kidney cancer	0.5583	0.155865	GCST90274820	5	110784241	0.0467	3.01e-06	5_110784241_T_C	11770	Leukemia inhibitory factor receptor levels	0.00185	0.00200143	23.6001	41.8887	21.8111
rs117117000	A	G	A	G	0.1586	0.227534	0.961	0.96115	kidney cancer	0.06086	0.121383	GCST90274820	8	119917062	0.0333	1.91e-06	8_119917062_A_G	11784	Leukemia inhibitory factor receptor levels	0.0019216	0.00188549	22.2568	41.8887	22.6839
rs1275374	A	G	A	G	-0.0611	0.015723	0.4056	0.3569	kidney cancer	0.8459	0.0808993	GCST90274820	8	118638630	0.0137	8.2e-06	8_118638630_A_G	11336	Leukemia inhibitory factor receptor levels	0.00175185	0.00180007	20.4388	41.8887	19.8903
rs12754806	A	G	A	G	0.0563	0.00210221	0.4817	0.4796	kidney cancer	0.9578	0.0397284	GCST90274820	1	238821453	0.0122	3.94e-06	1_238821453_A_G	11768	Leukemia inhibitory factor receptor levels	0.00180669	0.00158272	18.6518	41.8887	21.296
rs141933232	A	G	A	G	-0.2724	-0.277253	0.0169	0.01125	kidney cancer	0.1304	0.183304	GCST90274820	17	36964094	0.0546	6.07e-07	17_36964094_A_G	11724	Leukemia inhibitory factor receptor levels	0.00211888	0.00246563	28.9736	41.8887	24.8902
rs143212977	A	G	A	G	0.2467	0.0171462	0.0184	0.01738	kidney cancer	0.9183	0.167157	GCST90274820	12	115088443	0.0558	9.82e-06	12_115088443_A_G	11336	Leukemia inhibitory factor receptor levels	0.00172162	0.00219847	24.9724	41.8887	19.5465
rs147006060	A	G	A	G	-0.2602	0.189467	0.0179	0.01431	kidney cancer	0.6538	0.422456	GCST90274820	21	43780807	0.0566	4.28e-06	21_43780807_A_G	11775	Leukemia inhibitory factor receptor levels	0.00179191	0.00238042	28.0915	41.8887	21.134
rs1604713	A	C	A	C	-0.1451	0.172019	0.9399	0.95501	kidney cancer	0.1118	0.108177	GCST90274820	8	107256388	0.0322	6.6e-06	8_107256388_A_C	11336	Leukemia inhibitory factor receptor levels	0.00178839	0.0023786	27.0233	41.8887	20.3059
rs1690678	A	C	A	C	0.0904	-0.0536118	0.1109	0.1309	kidney cancer	0.3967	0.0632565	GCST90274820	10	27930818	0.0192	2.5e-06	10_27930818_A_C	11784	Leukemia inhibitory factor receptor levels	0.00187802	0.00161157	19.0182	41.8887	22.1684
rs2289779	T	G	T	G	0.0788	-0.0322133	0.5419	0.502	kidney cancer	0.4102	0.0391156	GCST90274820	5	38527228	0.0134	4.09e-09	5_38527228_T_G	11336	Leukemia inhibitory factor receptor levels	0.00304184	0.00308292	35.0498	41.8887	34.5814
rs2569006	T	G	T	G	-0.0553	-0.0177567	0.4142	0.4162	kidney cancer	0.6522	0.0393974	GCST90274820	5	145246085	0.0125	9.69e-06	5_145246085_T_G	11780	Leukemia inhibitory factor receptor levels	0.00165897	0.00148402	17.5048	41.8887	19.5718
rs41307428	T	C	T	C	0.2027	0.135705	0.067	0.04908	kidney cancer	0.2888	0.127932	GCST90274820	9	136336804	0.0299	1.21e-11	9_136336804_T_C	11774	Leukemia inhibitory factor receptor levels	0.00388886	0.00513682	60.7828	41.8887	45.9584
rs452976	T	C	T	C	0.0692	0.0001	0.8025	0.8262	kidney cancer	0.9982	0.0443247	GCST90274820	5	84611579	0.0153	6.1e-06	5_84611579_T_C	11770	Leukemia inhibitory factor receptor levels	0.00173529	0.00151794	17.8903	41.8887	20.4564
rs4689540	T	C	T	C	0.0611	0.0139975	0.5834	0.5368	kidney cancer	0.7238	0.0396098	GCST90274820	4	6753471	0.0138	9.53e-06	4_6753471_T_C	11336	Leukemia inhibitory factor receptor levels	0.0017266	0.00181467	20.6049	41.8887	19.6031
rs4937122	T	G	T	G	0.1262	0.0265446	0.9129	0.92638	kidney cancer	0.7223	0.0746921	GCST90274820	11	126228659	0.0248	3.61e-07	11_126228659_T_G	11336	Leukemia inhibitory factor receptor levels	0.00227951	0.00253274	28.7789	41.8887	25.895
rs62258077	T	C	T	C	-0.063	-0.081427	0.6603	0.6227	kidney cancer	0.04002	0.039652	GCST90274820	3	58363371	0.013	1.26e-06	3_58363371_T_C	11762	Leukemia inhibitory factor receptor levels	0.00199306	0.00178052	20.9763	41.8887	23.4852
rs635634	T	C	T	C	-0.2885	0.0231663	0.1918	0.1861	kidney cancer	0.6403	0.0495769	GCST90274820	9	136155000	0.0153	2.61e-79	9_136155000_T_C	11784	Leukemia inhibitory factor receptor levels	0.0292939	0.0258041	312.077	41.8887	355.557
rs6671847	A	G	A	G	-0.0604	-0.00866237	0.4812	0.4806	kidney cancer	0.8243	0.0390166	GCST90274820	1	161478810	0.0135	7.67e-06	1_161478810_A_G	11336	Leukemia inhibitory factor receptor levels	0.00176302	0.0018215	20.6826	41.8887	20.0173
rs7047277	T	C	T	C	0.0558	0.02137	0.6218	0.592	kidney cancer	0.5949	0.0401882	GCST90274820	9	14698077	0.0126	9.49e-06	9_14698077_T_C	11774	Leukemia inhibitory factor receptor levels	0.00166324	0.00146444	17.2646	41.8887	19.6122
rs72730728	A	T	A	T	0.1414	0.10993	0.9403	0.94888	kidney cancer	0.2673	0.0990984	GCST90274820	5	36424241	0.0302	2.84e-06	5_36424241_A_T	11336	Leukemia inhibitory factor receptor levels	0.00193047	0.00224476	25.4993	41.8887	21.9222
rs72837682	T	C	T	C	-0.08	-0.0011006	0.7807	0.7935	kidney cancer	0.9817	0.0479825	GCST90274820	17	7063650	0.0172	3.3e-06	17_7063650_T_C	11336	Leukemia inhibitory factor receptor levels	0.00190507	0.00219146	24.8925	41.8887	21.6333
rs73157388	T	C	T	C	-0.1306	-0.0442654	0.9229	0.93865	kidney cancer	0.5975	0.0838362	GCST90274820	7	79349730	0.0285	4.6e-06	7_79349730_T_C	11336	Leukemia inhibitory factor receptor levels	0.00184931	0.00242731	27.5781	41.8887	20.9989
rs778016	A	G	A	G	-0.0681	0.0343844	0.2875	0.2648	kidney cancer	0.4255	0.0431469	GCST90274820	6	68918580	0.0145	2.65e-06	6_68918580_A_G	9883	Leukemia inhibitory factor receptor levels	0.00222735	0.00189997	18.8093	41.8887	22.0576
rs78981063	A	G	A	G	-0.1377	0.0323704	0.9558	0.95706	kidney cancer	0.745	0.0995279	GCST90274820	2	84195883	0.0302	5.13e-06	2_84195883_A_G	11784	Leukemia inhibitory factor receptor levels	0.00176145	0.00160209	18.9061	41.8887	20.79
rs8059299	A	G	A	G	0.1051	-0.0237805	0.8941	0.90695	kidney cancer	0.7302	0.0689572	GCST90274820	16	9246057	0.0232	5.89e-06	16_9246057_A_G	11336	Leukemia inhibitory factor receptor levels	0.00180743	0.00209179	23.758	41.8887	20.5225
rs9313148	C	G	C	G	-0.0824	-0.029753	0.1414	0.1493	kidney cancer	0.5937	0.0557713	GCST90274820	5	6378192	0.0173	1.91e-06	5_6378192_C_G	11777	Leukemia inhibitory factor receptor levels	0.00192294	0.00164864	19.4447	41.8887	22.6862
rs11214549	A	G	A	G	-0.1673	-0.0168571	0.0305	0.0317	kidney cancer	0.8979	0.131373	GCST90274821	11	113108311	0.0376	8.61e-06	11_113108311_A_G	14732	Monocyte chemoattractant protein-1 levels	0.00134224	0.00165527	24.4226	41.8887	19.7978
rs117265389	C	G	C	G	0.1734	0.0800177	0.0256	0.02147	kidney cancer	0.5104	0.121568	GCST90274821	16	4938452	0.0377	4.24e-06	16_4938452_C_G	14733	Monocyte chemoattractant protein-1 levels	0.00143404	0.00150005	22.1304	41.8887	21.1551
rs117317477	T	G	T	G	-0.3227	0.221645	0.0125	0.01329	kidney cancer	0.2944	0.211389	GCST90274821	22	21921920	0.0704	4.57e-06	22_21921920_T_G	11725	Monocyte chemoattractant protein-1 levels	0.00178911	0.00257084	30.2156	41.8887	21.0113
rs11870164	T	C	T	C	0.0751	-0.0262524	0.2772	0.3016	kidney cancer	0.551	0.0440282	GCST90274821	17	32567679	0.013	7.61e-09	17_32567679_T_C	14733	Monocyte chemoattractant protein-1 levels	0.00226036	0.00226007	33.3685	41.8887	33.3728
rs12075	A	G	A	G	0.1694	-0.0557185	0.5552	0.6053	kidney cancer	0.1542	0.0391048	GCST90274821	1	159175354	0.0113	8.39e-51	1_159175354_A_G	14730	Monocyte chemoattractant protein-1 levels	0.0150297	0.0141733	211.746	41.8887	224.735
rs12133241	T	G	T	G	0.0728	-0.00561574	0.8345	0.863	kidney cancer	0.916	0.0532431	GCST90274821	1	14260220	0.0157	3.54e-06	1_14260220_T_G	14713	Monocyte chemoattractant protein-1 levels	0.00145944	0.00146392	21.5673	41.8887	21.5012
rs12367122	A	G	A	G	0.0739	0.0149106	0.1756	0.1892	kidney cancer	0.7718	0.0514121	GCST90274821	12	30998369	0.0159	3.35e-06	12_30998369_A_G	14284	Monocyte chemoattractant protein-1 levels	0.00151025	0.00158118	22.6182	41.8887	21.602
rs142018247	T	C	T	C	0.1966	-0.0834216	0.02	0.02045	kidney cancer	0.5665	0.145533	GCST90274821	2	114120803	0.0442	8.67e-06	2_114120803_T_C	14726	Monocyte chemoattractant protein-1 levels	0.00134188	0.00151514	22.3428	41.8887	19.7844
rs146186562	T	G	T	G	-0.2293	-0.260067	0.9789	0.97955	kidney cancer	0.08998	0.153386	GCST90274821	6	20408729	0.0497	3.96e-06	6_20408729_T_G	14285	Monocyte chemoattractant protein-1 levels	0.00148809	0.00217199	31.0901	41.8887	21.2861
rs148307902	A	G	A	G	0.2553	-0.237756	0.0243	0.01636	kidney cancer	0.3167	0.237457	GCST90274821	5	2885014	0.0538	2.08e-06	5_2885014_A_G	13798	Monocyte chemoattractant protein-1 levels	0.00162958	0.00309068	42.7712	41.8887	22.5184
rs149604038	C	G	C	G	-0.2813	-0.0924443	0.9851	0.98773	kidney cancer	0.5805	0.167273	GCST90274821	3	185463545	0.0556	4.21e-07	3_185463545_C_G	13798	Monocyte chemoattractant protein-1 levels	0.00185196	0.00232293	32.1218	41.8887	25.597
rs1788443	T	C	T	C	-0.0537	-0.0044899	0.5055	0.4796	kidney cancer	0.9094	0.039456	GCST90274821	21	43981957	0.0119	6.4e-06	21_43981957_T_C	14285	Monocyte chemoattractant protein-1 levels	0.00142369	0.00144167	20.6211	41.8887	20.3636
rs181998213	T	C	T	C	0.3723	-0.454603	0.9872	0.98364	kidney cancer	0.1888	0.345933	GCST90274821	3	46519788	0.0695	8.47e-08	3_46519788_T_C	14285	Monocyte chemoattractant protein-1 levels	0.00200505	0.00350293	50.2082	41.8887	28.6957
rs1846616	A	T	A	T	0.0856	-0.016231	0.362	0.3476	kidney cancer	0.6898	0.0406663	GCST90274821	3	46032441	0.0119	6.33e-13	3_46032441_A_T	14719	Monocyte chemoattractant protein-1 levels	0.00350356	0.0033846	49.9803	41.8887	51.7432
rs190108694	A	G	A	G	-0.2084	0.210968	0.0286	0.03681	kidney cancer	0.0939	0.125938	GCST90274821	18	75133468	0.0455	4.64e-06	18_75133468_A_G	11325	Monocyte chemoattractant protein-1 levels	0.0018493	0.00241318	27.3905	41.8887	20.9784
rs207311	T	C	T	C	0.0579	0.0213258	0.6697	0.6636	kidney cancer	0.6539	0.047565	GCST90274821	4	19075878	0.0126	4.32e-06	4_19075878_T_C	14285	Monocyte chemoattractant protein-1 levels	0.00147623	0.00148312	21.2149	41.8887	21.1162
rs2544916	A	T	A	T	0.1653	0.00924258	0.9698	0.98875	kidney cancer	0.9413	0.125517	GCST90274821	5	100158495	0.0366	6.29e-06	5_100158495_A_T	14720	Monocyte chemoattractant protein-1 levels	0.00138399	0.00160053	23.5944	41.8887	20.3978
rs34292320	T	C	T	C	-0.0684	0.104361	0.2742	0.2935	kidney cancer	0.01493	0.0428751	GCST90274821	13	43553825	0.0134	3.32e-07	13_43553825_T_C	14285	Monocyte chemoattractant protein-1 levels	0.00182092	0.0018622	26.6474	41.8887	26.0557
rs352082	C	G	C	G	0.0788	0.0458334	0.1269	0.1145	kidney cancer	0.4284	0.0578754	GCST90274821	6	114180646	0.0178	9.56e-06	6_114180646_C_G	14284	Monocyte chemoattractant protein-1 levels	0.00137034	0.00137597	19.6786	41.8887	19.598
rs35728689	A	G	A	G	0.3004	-0.0110388	0.0959	0.08793	kidney cancer	0.8794	0.0727533	GCST90274821	3	46390228	0.0198	5.44e-52	3_46390228_A_G	14732	Monocyte chemoattractant protein-1 levels	0.0153862	0.0156482	234.162	41.8887	230.181
rs4682862	A	G	A	G	0.0576	0.00548493	0.6154	0.5726	kidney cancer	0.8906	0.0398773	GCST90274821	3	42877413	0.0122	2.34e-06	3_42877413_A_G	14285	Monocyte chemoattractant protein-1 levels	0.00155822	0.00157051	22.4669	41.8887	22.2908
rs72730728	A	T	A	T	0.1238	0.10993	0.9416	0.94888	kidney cancer	0.2673	0.0990984	GCST90274821	5	36424241	0.0272	5.33e-06	5_36424241_A_T	14285	Monocyte chemoattractant protein-1 levels	0.00144829	0.00168559	24.1159	41.8887	20.7159
rs7619350	A	G	A	G	0.0986	0.0505567	0.118	0.1145	kidney cancer	0.4149	0.0620099	GCST90274821	3	132269435	0.0201	9.32e-07	3_132269435_A_G	11764	Monocyte chemoattractant protein-1 levels	0.0020417	0.00202365	23.8504	41.8887	24.0637
rs77128226	T	C	T	C	-0.1063	0.00883895	0.0875	0.08793	kidney cancer	0.9002	0.0704811	GCST90274821	20	15213518	0.0218	1.08e-06	20_15213518_T_C	14285	Monocyte chemoattractant protein-1 levels	0.00166193	0.00180442	25.8191	41.8887	23.7768
rs77344300	T	C	T	C	-0.1381	-0.144533	0.0491	0.05828	kidney cancer	0.1522	0.100945	GCST90274821	9	78838039	0.0293	2.44e-06	9_78838039_T_C	14733	Monocyte chemoattractant protein-1 levels	0.00150579	0.00178088	26.2809	41.8887	22.2153
rs9324105	T	C	T	C	-0.0775	-0.00290421	0.1395	0.1534	kidney cancer	0.9583	0.0555437	GCST90274821	14	29273195	0.0175	9.49e-06	14_29273195_T_C	14285	Monocyte chemoattractant protein-1 levels	0.00137123	0.00144198	20.6255	41.8887	19.6122
rs9942602	T	C	T	C	0.0618	-0.0506619	0.4922	0.4949	kidney cancer	0.1952	0.0391106	GCST90274821	7	17977054	0.0117	1.28e-07	7_17977054_T_C	14728	Monocyte chemoattractant protein-1 levels	0.00189103	0.00190916	28.168	41.8887	27.9001
rs12523126	A	T	A	T	0.1121	0.0411345	0.0746	0.06748	kidney cancer	0.5667	0.0717983	GCST90274822	5	165649355	0.0232	1.35e-06	5_165649355_A_T	14288	Monocyte chemoattractant protein 2 levels	0.00163161	0.00173504	24.8299	41.8887	23.3472
rs2005792	A	G	A	G	0.1744	0.00608147	0.7531	0.7434	kidney cancer	0.895	0.0460787	GCST90274822	17	32565404	0.0136	1.21e-37	17_32565404_A_G	14729	Monocyte chemoattractant protein 2 levels	0.0110428	0.0113109	168.481	41.8887	164.443
rs3136674	T	C	T	C	-0.1803	0.00508704	0.9455	0.9499	kidney cancer	0.9536	0.0874263	GCST90274822	17	32682616	0.0267	1.45e-11	17_32682616_T_C	14736	Monocyte chemoattractant protein 2 levels	0.00308536	0.00335027	49.5288	41.8887	45.6004
rs744156	A	C	A	C	-0.1588	-0.0111621	0.9594	0.96728	kidney cancer	0.9188	0.109491	GCST90274822	16	4700056	0.0325	1.03e-06	16_4700056_A_C	13663	Monocyte chemoattractant protein 2 levels	0.00174459	0.00196452	26.8902	41.8887	23.8745
rs7550207	T	C	T	C	0.0672	0.00836492	0.769	0.7546	kidney cancer	0.8545	0.0456152	GCST90274822	1	159174885	0.0139	1.33e-06	1_159174885_T_C	14736	Monocyte chemoattractant protein 2 levels	0.0015838	0.00160438	23.6769	41.8887	23.3727
rs75580960	T	C	T	C	-0.0904	0.0578915	0.8703	0.8661	kidney cancer	0.3908	0.0674594	GCST90274822	19	2151761	0.0188	1.52e-06	19_2151761_T_C	13224	Monocyte chemoattractant protein 2 levels	0.00174568	0.00184491	24.4385	41.8887	23.1218
rs116170440	A	G	A	G	-0.257	0.171382	0.0167	0.01534	kidney cancer	0.2178	0.139063	GCST90274823	4	36138371	0.0579	9.05e-06	4_36138371_A_G	10848	Monocyte chemoattractant protein-3 levels	0.00181322	0.0021692	23.5782	41.8887	19.7019
rs117550373	T	G	T	G	-0.1405	0.0146062	0.0501	0.04499	kidney cancer	0.8742	0.0922537	GCST90274823	14	76638061	0.0314	7.66e-06	14_76638061_T_G	11762	Monocyte chemoattractant protein-3 levels	0.0016996	0.00187888	22.1372	41.8887	20.0213
rs12075	A	G	A	G	-0.0899	-0.0557185	0.5624	0.6053	kidney cancer	0.1542	0.0391048	GCST90274823	1	159175354	0.013	4.67e-12	1_159175354_A_G	11780	Monocyte chemoattractant protein-3 levels	0.00404391	0.00397807	47.0408	41.8887	47.8225
rs12661848	T	G	T	G	0.0655	-0.0148091	0.5602	0.5337	kidney cancer	0.7111	0.0399837	GCST90274823	6	123906471	0.0147	8.36e-06	6_123906471_T_G	9889	Monocyte chemoattractant protein-3 levels	0.00200407	0.00211403	20.9457	41.8887	19.854
rs139796674	A	G	A	G	0.2334	0.0116678	0.0249	0.0184	kidney cancer	0.9389	0.152217	GCST90274823	9	110584352	0.0492	2.1e-06	9_110584352_A_G	11335	Monocyte chemoattractant protein-3 levels	0.00198182	0.00264533	30.0591	41.8887	22.5046
rs143052555	T	C	T	C	0.1051	-0.422967	0.8213		kidney cancer	0.1098	0.264505	GCST90274823	12	117637971	0.0233	6.46e-06	12_117637971_T_C	8587	Monocyte chemoattractant protein-3 levels	0.00236442	0.00324236	27.9262	41.8887	20.3467
rs146174820	A	G	A	G	0.2663	0.00451016	0.0247	0.02761	kidney cancer	0.9755	0.146858	GCST90274823	2	68614232	0.0547	1.13e-06	2_68614232_A_G	10469	Monocyte chemoattractant protein-3 levels	0.00225924	0.0034167	35.8853	41.8887	23.7011
rs147793446	A	G	A	G	0.1941	-0.138195	0.0345	0.02761	kidney cancer	0.3465	0.146798	GCST90274823	1	201769310	0.0413	2.6e-06	1_201769310_A_G	11770	Monocyte chemoattractant protein-3 levels	0.00187342	0.00250988	29.6106	41.8887	22.0877
rs148859911	A	G	A	G	0.1507	0.098716	0.05	0.05215	kidney cancer	0.2786	0.091111	GCST90274823	11	42245173	0.0328	4.34e-06	11_42245173_A_G	11771	Monocyte chemoattractant protein-3 levels	0.00179045	0.0021575	25.4465	41.8887	21.1095
rs16947053	A	G	A	G	0.2264	-0.0527681	0.9779	0.97955	kidney cancer	0.6889	0.131805	GCST90274823	15	93092575	0.0487	3.34e-06	15_93092575_A_G	11783	Monocyte chemoattractant protein-3 levels	0.00183112	0.00221549	26.1586	41.8887	21.612
rs182239847	T	G	T	G	-0.1716	-0.207639	0.9096	0.9591	kidney cancer	0.05433	0.10791	GCST90274823	4	144892144	0.0359	1.75e-06	4_144892144_T_G	9453	Monocyte chemoattractant protein-3 levels	0.00241168	0.00484265	45.9906	41.8887	22.8479
rs187435509	T	G	T	G	0.171	0.102919	0.0356	0.02352	kidney cancer	0.3438	0.108715	GCST90274823	16	4844729	0.0381	7.18e-06	16_4844729_T_G	11780	Monocyte chemoattractant protein-3 levels	0.00170737	0.00200784	23.6959	41.8887	20.1438
rs2228467	T	C	T	C	-0.3169	-0.0293258	0.9268	0.93149	kidney cancer	0.7117	0.0793504	GCST90274823	3	42906116	0.0252	2.88e-36	3_42906116_T_C	11782	Monocyte chemoattractant protein-3 levels	0.0132467	0.0136261	162.733	41.8887	158.141
rs28571854	T	C	T	C	-0.1098	0.0454159	0.0785	0.07362	kidney cancer	0.5228	0.0710694	GCST90274823	9	16472947	0.0247	8.78e-06	9_16472947_T_C	11775	Monocyte chemoattractant protein-3 levels	0.0016757	0.00174421	20.5705	41.8887	19.7611
rs28667091	T	G	T	G	-0.0613	-0.0594316	0.4117	0.4254	kidney cancer	0.1366	0.0399252	GCST90274823	4	47682997	0.0133	4.05e-06	4_47682997_T_G	11782	Monocyte chemoattractant protein-3 levels	0.00180007	0.00182025	21.4816	41.8887	21.2431
rs4146770	T	C	T	C	-0.0933	0.0645385	0.7978	0.8016	kidney cancer	0.1864	0.0488446	GCST90274823	3	151048544	0.0165	1.56e-08	3_151048544_T_C	11760	Monocyte chemoattractant protein-3 levels	0.00271195	0.00280846	33.1149	41.8887	31.9739
rs481267	A	G	A	G	-0.0754	0.0464064	0.3263	0.32	kidney cancer	0.26	0.0411992	GCST90274823	1	108717820	0.015	4.99e-07	1_108717820_A_G	9889	Monocyte chemoattractant protein-3 levels	0.0025491	0.00249952	24.7747	41.8887	25.2674
rs7116054	T	C	T	C	-0.0998	0.0616627	0.1822	0.1708	kidney cancer	0.2616	0.0549276	GCST90274823	11	68891695	0.0179	2.47e-08	11_68891695_T_C	11335	Monocyte chemoattractant protein-3 levels	0.0027354	0.00296816	33.7382	41.8887	31.0853
rs7213460	A	G	A	G	0.0942	-0.024595	0.4161	0.4448	kidney cancer	0.5326	0.0394125	GCST90274823	17	32522613	0.0132	9.58e-13	17_32522613_A_G	11780	Monocyte chemoattractant protein-3 levels	0.00430535	0.00431189	51.0054	41.8887	50.9277
rs72689930	T	G	T	G	0.1624	0.00439035	0.9529	0.96319	kidney cancer	0.9711	0.121184	GCST90274823	4	158925763	0.0363	7.68e-06	4_158925763_T_G	11783	Monocyte chemoattractant protein-3 levels	0.00169605	0.00236739	27.9564	41.8887	20.0151
rs72793575	A	G	A	G	0.1043	-0.0478373	0.1037	0.1074	kidney cancer	0.5054	0.0718259	GCST90274823	2	23771966	0.0235	9.07e-06	2_23771966_A_G	11335	Monocyte chemoattractant protein-3 levels	0.00173514	0.00202223	22.9644	41.8887	19.6985
rs72939501	A	G	A	G	-0.1014	-0.0400857	0.1082	0.09816	kidney cancer	0.5539	0.0677208	GCST90274823	18	60781974	0.0226	7.23e-06	18_60781974_A_G	11335	Monocyte chemoattractant protein-3 levels	0.00177314	0.00198427	22.5324	41.8887	20.1307
rs7327202	C	G	C	G	-0.0969	0.00040008	0.1497	0.1227	kidney cancer	0.9941	0.0541042	GCST90274823	13	58931726	0.0194	5.89e-07	13_58931726_C_G	10903	Monocyte chemoattractant protein-3 levels	0.00228342	0.0023904	26.1202	41.8887	24.9485
rs74157668	T	C	T	C	0.1574	0.184404	0.0404	0.02761	kidney cancer	0.06814	0.101094	GCST90274823	10	121143312	0.0343	4.46e-06	10_121143312_T_C	11781	Monocyte chemoattractant protein-3 levels	0.00178458	0.00192093	22.6702	41.8887	21.0582
rs78848134	T	C	T	C	0.2441	-0.148334	0.0198	0.01636	kidney cancer	0.3767	0.1678	GCST90274823	20	41126657	0.0514	2.04e-06	20_41126657_T_C	11296	Monocyte chemoattractant protein-3 levels	0.00199294	0.00231284	26.1818	41.8887	22.5533
rs8129542	A	T	A	T	-0.1022	0.106139	0.1218	0.1063	kidney cancer	0.1193	0.0681372	GCST90274823	21	45846823	0.0228	7.38e-06	21_45846823_A_T	10271	Monocyte chemoattractant protein-3 levels	0.00195279	0.00223446	22.9971	41.8887	20.0924
rs9968876	T	G	T	G	-0.1046	-0.037079	0.8991	0.8967	kidney cancer	0.5556	0.0629109	GCST90274823	6	100087282	0.0221	2.21e-06	6_100087282_T_G	11774	Monocyte chemoattractant protein-3 levels	0.00189934	0.00198515	23.4156	41.8887	22.4016
rs113911480	T	G	T	G	-0.1502	-0.139722	0.9632	0.96524	kidney cancer	0.1486	0.0967272	GCST90274824	14	29113167	0.0333	6.47e-06	14_29113167_T_G	14709	Monocyte chemoattractant protein-4 levels	0.00138142	0.00159932	23.5588	41.8887	20.3447
rs114438927	A	G	A	G	0.2261	0.154084	0.0163	0.01943	kidney cancer	0.2574	0.13605	GCST90274824	15	30072182	0.05	6.13e-06	15_30072182_A_G	12852	Monocyte chemoattractant protein-4 levels	0.00158879	0.00163939	21.1007	41.8887	20.4485
rs115511138	A	G	A	G	0.1956	0.0636319	0.9694	0.98364	kidney cancer	0.6002	0.121409	GCST90274824	4	115566991	0.042	3.21e-06	4_115566991_A_G	13944	Monocyte chemoattractant protein-4 levels	0.00155324	0.00226982	31.7179	41.8887	21.689
rs12075	A	G	A	G	0.189	-0.0557185	0.5553	0.6053	kidney cancer	0.1542	0.0391048	GCST90274824	1	159175354	0.0114	9.89e-62	1_159175354_A_G	14733	Monocyte chemoattractant protein-4 levels	0.0183169	0.017642	264.552	41.8887	274.861
rs144118870	A	G	A	G	0.1749	0.0632565	0.963	0.97546	kidney cancer	0.6537	0.141	GCST90274824	6	31214807	0.0368	2.01e-06	6_31214807_A_G	14735	Monocyte chemoattractant protein-4 levels	0.00153083	0.00217991	32.1867	41.8887	22.5883
rs144982290	T	C	T	C	0.2271	-0.0302382	0.025	0.01636	kidney cancer	0.8314	0.142026	GCST90274824	4	153541434	0.05	5.57e-06	4_153541434_T_C	13801	Monocyte chemoattractant protein-4 levels	0.00149279	0.00251425	34.7816	41.8887	20.6298
rs148945704	C	G	C	G	-0.2016	0.131248	0.0179	0.01738	kidney cancer	0.3612	0.143742	GCST90274824	2	160090389	0.0456	9.82e-06	2_160090389_C_G	14232	Monocyte chemoattractant protein-4 levels	0.00137167	0.00142896	20.3632	41.8887	19.5457
rs181250	T	C	T	C	-0.1032	-0.0691529	0.8805	0.8701	kidney cancer	0.5565	0.117597	GCST90274824	17	56210459	0.0208	6.99e-07	17_56210459_T_C	11538	Monocyte chemoattractant protein-4 levels	0.00212937	0.00224123	25.9129	41.8887	24.6169
rs2192410	C	G	C	G	0.072	-0.00588266	0.1934	0.1728	kidney cancer	0.9057	0.0496578	GCST90274824	3	172370658	0.0158	5.19e-06	3_172370658_C_G	12836	Monocyte chemoattractant protein-4 levels	0.00161542	0.00161737	20.791	41.8887	20.7659
rs2497351	T	C	T	C	0.0668	-0.0258308	0.2018	0.1871	kidney cancer	0.6044	0.0498583	GCST90274824	10	94520346	0.0145	4.09e-06	10_94520346_T_C	14736	Monocyte chemoattractant protein-4 levels	0.00143837	0.00143753	21.211	41.8887	21.2235
rs2631360	A	G	A	G	0.0609	0.0569937	0.5448	0.5532	kidney cancer	0.1431	0.038921	GCST90274824	5	131707429	0.0131	3.34e-06	5_131707429_A_G	11782	Monocyte chemoattractant protein-4 levels	0.00183126	0.00183952	21.7095	41.8887	21.6119
rs2721961	T	G	T	G	-0.1201	-0.0942008	0.7293	0.7577	kidney cancer	0.02674	0.042523	GCST90274824	8	116657911	0.0133	1.72e-19	8_116657911_T_G	14288	Monocyte chemoattractant protein-4 levels	0.00567545	0.00569522	81.8279	41.8887	81.5423
rs3136676	A	G	A	G	0.3903	0.0293646	0.9384	0.94376	kidney cancer	0.7286	0.0846271	GCST90274824	17	32683289	0.0251	1.6e-54	17_32683289_A_G	14728	Monocyte chemoattractant protein-4 levels	0.0161544	0.0176115	263.996	41.8887	241.796
rs34202150	T	C	T	C	0.08	-0.0811016	0.8698	0.8834	kidney cancer	0.5512	0.136085	GCST90274824	16	24019294	0.0181	9.88e-06	16_24019294_T_C	14288	Monocyte chemoattractant protein-4 levels	0.00136559	0.00144957	20.7387	41.8887	19.5354
rs3917900	A	G	A	G	0.1557	0.0011006	0.6401	0.6196	kidney cancer	0.978	0.0399111	GCST90274824	17	32587314	0.012	1.7e-38	17_32587314_A_G	14730	Monocyte chemoattractant protein-4 levels	0.0113015	0.0111696	166.364	41.8887	168.351
rs438824	A	G	A	G	-0.0548	0.187226	0.4985	0.4898	kidney cancer	0.01808	0.0791997	GCST90274824	9	102016891	0.0121	5.93e-06	9_102016891_A_G	14287	Monocyte chemoattractant protein-4 levels	0.0014338	0.00150151	21.4813	41.8887	20.5112
rs55842014	A	G	A	G	-0.0638	-0.0280042	0.3598	0.3517	kidney cancer	0.4875	0.040335	GCST90274824	3	46289113	0.0131	1.11e-06	3_46289113_A_G	12404	Monocyte chemoattractant protein-4 levels	0.00190887	0.0018752	23.3	41.8887	23.7191
rs56003568	C	G	C	G	0.0569	-0.0128175	0.2956	0.3037	kidney cancer	0.7636	0.0426175	GCST90274824	2	203491699	0.0126	6.31e-06	2_203491699_C_G	14734	Monocyte chemoattractant protein-4 levels	0.00138236	0.00134827	19.8896	41.8887	20.3931
rs62201455	A	C	A	C	-0.2136	-0.311019	0.9807	0.97955	kidney cancer	0.04308	0.153746	GCST90274824	20	12689462	0.0451	2.18e-06	20_12689462_A_C	14722	Monocyte chemoattractant protein-4 levels	0.00152153	0.00172713	25.4674	41.8887	22.431
rs62336911	T	C	T	C	0.1569	0.150939	0.0417	0.03988	kidney cancer	0.1564	0.106499	GCST90274824	4	176433708	0.0332	2.29e-06	4_176433708_T_C	14288	Monocyte chemoattractant protein-4 levels	0.00156092	0.00196749	28.163	41.8887	22.3342
rs72825017	T	G	T	G	-0.1997	-0.0327576	0.0594	0.06135	kidney cancer	0.712	0.0887327	GCST90274824	17	32529710	0.0251	1.77e-15	17_32529710_T_G	14730	Monocyte chemoattractant protein-4 levels	0.00427959	0.00445633	65.9266	41.8887	63.3007
rs72832833	A	G	A	G	-0.0635	0.0401818	0.7811	0.7751	kidney cancer	0.4055	0.0483048	GCST90274824	10	117669867	0.0143	8.97e-06	10_117669867_A_G	14734	Monocyte chemoattractant protein-4 levels	0.0013367	0.00137889	20.3419	41.8887	19.7186
rs7612912	T	C	T	C	0.1281	0.0235212	0.6276	0.5971	kidney cancer	0.5558	0.0399279	GCST90274824	3	42910621	0.012	1.33e-26	3_42910621_T_C	14714	Monocyte chemoattractant protein-4 levels	0.00768622	0.00767045	113.72	41.8887	113.956
rs77609620	C	G	C	G	-0.1093	-0.0392207	0.0716	0.07771	kidney cancer	0.6466	0.0855431	GCST90274824	19	18452787	0.0243	6.86e-06	19_18452787_C_G	14288	Monocyte chemoattractant protein-4 levels	0.00141417	0.00158825	22.7258	41.8887	20.2315
rs8112014	A	G	A	G	-0.0578	-0.0138043	0.2923	0.3027	kidney cancer	0.7448	0.042409	GCST90274824	19	14773077	0.0126	4.49e-06	19_14773077_A_G	14724	Monocyte chemoattractant protein-4 levels	0.00142734	0.00138218	20.3766	41.8887	21.0433
rs847767	A	G	A	G	0.077	0.0192142	0.8533	0.864	kidney cancer	0.7456	0.0592215	GCST90274824	6	40051588	0.0168	4.58e-06	6_40051588_A_G	14733	Monocyte chemoattractant protein-4 levels	0.00142401	0.00148437	21.8988	41.8887	21.0069
rs926646	T	C	T	C	0.1432	0.0516432	0.9545	0.97444	kidney cancer	0.8153	0.221081	GCST90274824	20	20023326	0.0304	2.47e-06	20_20023326_T_C	14732	Monocyte chemoattractant protein-4 levels	0.00150412	0.00178116	26.2833	41.8887	22.1891
rs112449949	T	C	T	C	-0.1932	0.120023	0.0345	0.0409	kidney cancer	0.6685	0.280292	GCST90274825	12	130276202	0.0434	8.52e-06	12_130276202_T_C	13394	Macrophage inflammatory protein 1a levels	0.00147757	0.00248665	33.3843	41.8887	19.8169
rs1125560	T	C	T	C	-0.0644	-0.0416217	0.632	0.6493	kidney cancer	0.3064	0.0406937	GCST90274825	12	67790676	0.0124	2.06e-07	12_67790676_T_C	13863	Macrophage inflammatory protein 1a levels	0.00194218	0.00192915	26.7917	41.8887	26.9729
rs113448118	A	G	A	G	0.0818	0.0750469	0.1528	0.1247	kidney cancer	0.195	0.0579097	GCST90274825	7	1108954	0.0179	4.88e-06	7_1108954_A_G	11793	Macrophage inflammatory protein 1a levels	0.001768	0.00173239	20.4621	41.8887	20.8834
rs1143687	T	C	T	C	-0.1229	-0.0710175	0.0627	0.07055	kidney cancer	0.3774	0.0804551	GCST90274825	16	81922813	0.024	3.04e-07	16_81922813_T_C	14743	Macrophage inflammatory protein 1a levels	0.00177575	0.00177533	26.2167	41.8887	26.2229
rs1295911	A	G	A	G	-0.087	-0.0267393	0.8805	0.8845	kidney cancer	0.6581	0.0604226	GCST90274825	10	12075632	0.0193	6.55e-06	10_12075632_A_G	12799	Macrophage inflammatory protein 1a levels	0.00158536	0.00159282	20.4158	41.8887	20.32
rs147065959	A	C	A	C	0.302	0.168899	0.985	0.98671	kidney cancer	0.4326	0.215226	GCST90274825	15	28291907	0.068	8.95e-06	15_28291907_A_C	11438	Macrophage inflammatory protein 1a levels	0.00172176	0.00269508	30.9042	41.8887	19.724
rs2847249	T	C	T	C	-0.0621	0.096621	0.2605	0.2577	kidney cancer	0.02921	0.0443086	GCST90274825	18	12747235	0.0136	4.97e-06	18_12747235_T_C	14294	Macrophage inflammatory protein 1a levels	0.00145673	0.0014858	21.2666	41.8887	20.85
rs2853926	A	G	A	G	-0.0608	-0.0621946	0.7392	0.7362	kidney cancer	0.2041	0.0489738	GCST90274825	6	31263051	0.0133	4.84e-06	6_31263051_A_G	14743	Macrophage inflammatory protein 1a levels	0.00141567	0.0014253	21.0404	41.8887	20.898
rs56675286	A	C	A	C	-0.1806	0.0926637	0.0383	0.03272	kidney cancer	0.3735	0.104124	GCST90274825	17	34358060	0.0325	2.75e-08	17_34358060_A_C	14743	Macrophage inflammatory protein 1a levels	0.00209042	0.00240272	35.5039	41.8887	30.8794
rs5743604	A	G	A	G	-0.0736	-0.0662466	0.7503	0.726	kidney cancer	0.4617	0.0900029	GCST90274825	4	38801285	0.0135	4.98e-08	4_38801285_A_G	14737	Macrophage inflammatory protein 1a levels	0.00201309	0.00202973	29.969	41.8887	29.7227
rs574716857	T	C	T	C	-0.1761	-0.0495518	0.0346	0.02147	kidney cancer	0.7305	0.143853	GCST90274825	14	81471588	0.0396	8.71e-06	14_81471588_T_C	11768	Macrophage inflammatory protein 1a levels	0.00167792	0.00207172	24.4265	41.8887	19.7755
rs66822987	T	C	T	C	0.0653	-0.00279609	0.2284	0.2495	kidney cancer	0.9533	0.0477448	GCST90274825	3	63106417	0.0144	5.77e-06	3_63106417_T_C	14295	Macrophage inflammatory protein 1a levels	0.00143666	0.00150295	21.514	41.8887	20.5637
rs677925	T	C	T	C	-0.0668	-0.0184695	0.7284	0.7536	kidney cancer	0.6749	0.0440345	GCST90274825	17	15741465	0.0143	2.99e-06	17_15741465_T_C	12411	Macrophage inflammatory protein 1a levels	0.00175542	0.00176556	21.9476	41.8887	21.8213
rs7137828	T	C	T	C	-0.0837	0.0330399	0.5247	0.5337	kidney cancer	0.3962	0.0389425	GCST90274825	12	111932800	0.0133	3.11e-10	12_111932800_T_C	11344	Macrophage inflammatory protein 1a levels	0.00347972	0.0034943	39.7713	41.8887	39.6048
rs7537266	T	C	T	C	0.0615	0.0419685	0.2426	0.2434	kidney cancer	0.3415	0.0441214	GCST90274825	1	238391155	0.0137	7.15e-06	1_238391155_T_C	14294	Macrophage inflammatory protein 1a levels	0.001408	0.00138994	19.8927	41.8887	20.1516
rs78871521	T	C	T	C	0.1812	0.0354199	0.0304	0.02352	kidney cancer	0.7484	0.110429	GCST90274825	16	4774017	0.0371	1.04e-06	16_4774017_T_C	13246	Macrophage inflammatory protein 1a levels	0.00179791	0.00193559	25.6846	41.8887	23.8544
rs7917198	T	G	T	G	-0.0706	0.0393169	0.8397	0.8395	kidney cancer	0.4695	0.0543582	GCST90274825	10	93675891	0.0159	8.99e-06	10_93675891_T_G	14731	Macrophage inflammatory protein 1a levels	0.00133678	0.00134183	19.7904	41.8887	19.7158
rs8951	T	C	T	C	-0.4102	0.0718554	0.7695	0.7638	kidney cancer	0.1322	0.0477292	GCST90274825	17	34415720	0.0135	8.62e-203	17_34415720_T_C	14295	Macrophage inflammatory protein 1a levels	0.0606759	0.0596899	907.305	41.8887	923.259
rs9540456	A	G	A	G	0.0926	0.0669107	0.8776	0.90082	kidney cancer	0.2688	0.0605072	GCST90274825	13	66085374	0.0181	3.12e-07	13_66085374_A_G	14295	Macrophage inflammatory protein 1a levels	0.00182788	0.00184217	26.3787	41.8887	26.1737
rs9911791	A	G	A	G	0.176	0.0231304	0.8208	0.7914	kidney cancer	0.7134	0.0629753	GCST90274825	17	34820996	0.0162	1.71e-27	17_34820996_A_G	14295	Macrophage inflammatory protein 1a levels	0.00819031	0.00911236	131.441	41.8887	118.031
rs10732827	A	G	A	G	0.0558	-0.056782	0.3498	0.3814	kidney cancer	0.1632	0.0407218	GCST90274826	10	85891907	0.0124	6.8e-06	10_85891907_A_G	14742	Matrix metalloproteinase-1 levels	0.00137193	0.00141633	20.9063	41.8887	20.25
rs10978641	A	T	A	T	0.0649	-0.174592	0.7462	0.7669	kidney cancer	0.05239	0.0899996	GCST90274826	9	109554196	0.014	3.56e-06	9_109554196_A_T	14296	Matrix metalloproteinase-1 levels	0.00150116	0.00159539	22.8409	41.8887	21.4898
rs10990535	T	C	T	C	0.0703	-0.0378737	0.253	0.2311	kidney cancer	0.4126	0.0462253	GCST90274826	9	99091009	0.0135	1.91e-07	9_99091009_T_C	14734	Matrix metalloproteinase-1 levels	0.00183731	0.00186802	27.5712	41.8887	27.1171
rs116350236	A	T	A	T	0.0639	0.0369752	0.3845	0.3742	kidney cancer	0.4156	0.0454197	GCST90274826	12	124668322	0.0142	6.8e-06	12_124668322_A_T	10717	Matrix metalloproteinase-1 levels	0.00188631	0.00193266	20.7486	41.8887	20.25
rs11673125	T	C	T	C	-0.0585	-0.0071742	0.296	0.3098	kidney cancer	0.8647	0.0421035	GCST90274826	19	14763748	0.0127	4.1e-06	19_14763748_T_C	14741	Matrix metalloproteinase-1 levels	0.00143751	0.00142628	21.052	41.8887	21.218
rs116889819	A	G	A	G	-0.176	0.148616	0.0455	0.03681	kidney cancer	0.08597	0.0865531	GCST90274826	11	102806398	0.03	4.45e-09	11_102806398_A_G	14744	Matrix metalloproteinase-1 levels	0.00232924	0.00269056	39.7712	41.8887	34.4178
rs12122036	A	T	A	T	-0.1077	0.0842516	0.0741	0.06339	kidney cancer	0.2553	0.0740627	GCST90274826	1	109101434	0.024	7.21e-06	1_109101434_A_T	14296	Matrix metalloproteinase-1 levels	0.00140684	0.00159164	22.7871	41.8887	20.1377
rs12141791	A	G	A	G	0.0859	0.0077298	0.6981	0.7372	kidney cancer	0.8739	0.0487049	GCST90274826	1	156419786	0.013	3.9e-11	1_156419786_A_G	14296	Matrix metalloproteinase-1 levels	0.00304524	0.00311026	44.5968	41.8887	43.6616
rs12367368	T	G	T	G	0.0861	0.0906909	0.1146	0.1319	kidney cancer	0.1354	0.0607383	GCST90274826	12	83594043	0.0186	3.67e-06	12_83594043_T_G	14744	Matrix metalloproteinase-1 levels	0.00145142	0.00150439	22.2111	41.8887	21.4279
rs12380451	T	C	T	C	-0.0593	0.0284903	0.7098	0.6779	kidney cancer	0.5043	0.0426668	GCST90274826	9	9191014	0.0133	8.25e-06	9_9191014_T_C	14296	Matrix metalloproteinase-1 levels	0.00138883	0.00144868	20.7375	41.8887	19.8795
rs141782294	A	G	A	G	0.3767	-0.0765571	0.9777	0.97444	kidney cancer	0.6703	0.179823	GCST90274826	11	102354473	0.0445	2.56e-17	11_102354473_A_G	14731	Matrix metalloproteinase-1 levels	0.00484161	0.00618773	91.7066	41.8887	71.6591
rs148908824	A	G	A	G	-0.2306	0.330311	0.0214	0.01636	kidney cancer	0.005783	0.119685	GCST90274826	12	24806965	0.0517	8.18e-06	12_24806965_A_G	12935	Matrix metalloproteinase-1 levels	0.00153593	0.00222724	28.8692	41.8887	19.8947
rs149819211	A	G	A	G	-0.1601	0.196502	0.0417	0.02863	kidney cancer	0.1176	0.125566	GCST90274826	1	21336393	0.0351	5.08e-06	1_21336393_A_G	14744	Matrix metalloproteinase-1 levels	0.00140929	0.00204857	30.262	41.8887	20.805
rs188626385	T	C	T	C	-0.2509	0.203831	0.0177	0.0184	kidney cancer	0.121	0.131454	GCST90274826	7	120591120	0.053	2.2e-06	7_120591120_T_C	12935	Matrix metalloproteinase-1 levels	0.00172981	0.00218901	28.3726	41.8887	22.4104
rs189173367	T	C	T	C	0.3179	0.116759	0.0131	0.02352	kidney cancer	0.6039	0.225055	GCST90274826	3	8761961	0.0714	8.49e-06	3_8761961_T_C	11925	Matrix metalloproteinase-1 levels	0.00165988	0.0026131	31.2376	41.8887	19.8237
rs2155053	T	C	T	C	-0.3212	0.0946404	0.9461	0.95501	kidney cancer	0.2713	0.086031	GCST90274826	11	102604607	0.0264	4.68e-34	11_102604607_T_C	14741	Matrix metalloproteinase-1 levels	0.00994341	0.0105222	156.736	41.8887	148.028
rs2229629	A	G	A	G	-0.3153	0.134217	0.0135	0.01431	kidney cancer	0.41	0.162906	GCST90274826	2	75116527	0.0673	2.8e-06	2_75116527_A_G	10887	Matrix metalloproteinase-1 levels	0.0020124	0.00264794	28.8994	41.8887	21.9492
rs2926741	T	C	T	C	-0.0704	-0.0626204	0.3436	0.3722	kidney cancer	0.124	0.0407102	GCST90274826	12	57098597	0.0126	2.31e-08	12_57098597_T_C	14296	Matrix metalloproteinase-1 levels	0.00217923	0.00223561	32.0275	41.8887	31.2179
rs372555709	T	C	T	C	0.2514	-0.0662558	0.0194	0.01227	kidney cancer	0.7469	0.205298	GCST90274826	9	87142351	0.0566	8.93e-06	9_87142351_T_C	11282	Matrix metalloproteinase-1 levels	0.00174594	0.00240466	27.19	41.8887	19.7287
rs4734879	A	G	A	G	0.1136	-0.0137947	0.7422	0.7076	kidney cancer	0.7508	0.0434363	GCST90274826	8	106583124	0.0137	1.11e-16	8_106583124_A_G	14296	Matrix metalloproteinase-1 levels	0.00478716	0.00493845	70.9405	41.8887	68.7568
rs58811245	T	C	T	C	-0.1051	-0.0502412	0.9266	0.93967	kidney cancer	0.516	0.0773509	GCST90274826	20	60732102	0.0234	7.07e-06	20_60732102_T_C	14723	Matrix metalloproteinase-1 levels	0.00136849	0.00150253	22.1521	41.8887	20.1731
rs6717478	A	T	A	T	0.1548	0.0216636	0.966	0.9683	kidney cancer	0.84	0.107302	GCST90274826	2	63657053	0.0338	4.65e-06	2_63657053_A_T	14742	Matrix metalloproteinase-1 levels	0.001421	0.00157408	23.2386	41.8887	20.9753
rs7219205	A	G	A	G	0.0569	-0.0648586	0.5023	0.4622	kidney cancer	0.1482	0.0448563	GCST90274826	17	4351312	0.0121	2.57e-06	17_4351312_A_G	14296	Matrix metalloproteinase-1 levels	0.00154465	0.00161877	23.1762	41.8887	22.1133
rs72777396	A	G	A	G	0.1657	-0.0148091	0.9671	0.97853	kidney cancer	0.8984	0.115984	GCST90274826	2	10923106	0.0364	5.31e-06	2_10923106_A_G	14744	Matrix metalloproteinase-1 levels	0.00140371	0.0017472	25.8023	41.8887	20.7225
rs77095316	T	G	T	G	-0.1416	0.0119714	0.0705	0.06748	kidney cancer	0.8755	0.0764083	GCST90274826	11	102572180	0.0238	2.69e-09	11_102572180_T_G	14744	Matrix metalloproteinase-1 levels	0.00239538	0.00262782	38.8413	41.8887	35.3975
rs873675	T	C	T	C	0.1234	0.0878481	0.0684	0.05215	kidney cancer	0.2572	0.0775335	GCST90274826	3	64991445	0.0234	1.34e-07	3_64991445_T_C	14742	Matrix metalloproteinase-1 levels	0.00188314	0.00194064	28.6607	41.8887	27.8098
rs9524612	T	C	T	C	-0.072	0.103695	0.177	0.1575	kidney cancer	0.03411	0.0489413	GCST90274826	13	95429892	0.0162	8.81e-06	13_95429892_T_C	14296	Matrix metalloproteinase-1 levels	0.00138001	0.00151032	21.6211	41.8887	19.7531
rs10971521	A	G	A	G	-0.0585	0.0100503	0.2739	0.2679	kidney cancer	0.8191	0.043945	GCST90274827	9	33470408	0.0132	9.34e-06	9_33470408_A_G	14725	Matrix metalloproteinase-10 levels	0.00133226	0.00136123	20.0686	41.8887	19.641
rs112062276	T	G	T	G	0.1203	-0.100479	0.0601	0.07464	kidney cancer	0.2502	0.0873831	GCST90274827	6	134160498	0.0249	1.36e-06	6_134160498_T_G	14733	Matrix metalloproteinase-10 levels	0.00158202	0.001635	24.1246	41.8887	23.3417
rs11225354	T	C	T	C	0.2957	0.0733434	0.879	0.8875	kidney cancer	0.2285	0.0609047	GCST90274827	11	102510046	0.0181	5.38e-60	11_102510046_T_C	14296	Matrix metalloproteinase-10 levels	0.0183298	0.0185997	270.903	41.8887	266.898
rs112327130	C	G	C	G	-0.2862	-0.551353	0.0153	0.01125	kidney cancer	0.05099	0.282519	GCST90274827	8	77953661	0.0608	2.51e-06	8_77953661_C_G	12456	Matrix metalloproteinase-10 levels	0.00177603	0.00246811	30.8139	41.8887	22.1581
rs112966738	T	C	T	C	0.2201	0.175716	0.9801	0.97955	kidney cancer	0.282	0.16333	GCST90274827	9	81249363	0.0486	5.93e-06	9_81249363_T_C	14296	Matrix metalloproteinase-10 levels	0.00143282	0.0018897	27.0626	41.8887	20.5101
rs113958571	A	G	A	G	-0.2315	0.279582	0.0188	0.0184	kidney cancer	0.03207	0.13043	GCST90274827	20	20711695	0.0503	4.18e-06	20_20711695_A_G	14296	Matrix metalloproteinase-10 levels	0.00147968	0.00197718	28.3179	41.8887	21.182
rs11771706	A	C	A	C	0.2157	-0.0192848	0.9813	0.97955	kidney cancer	0.9034	0.158896	GCST90274827	7	13720685	0.0482	7.64e-06	7_13720685_A_C	14744	Matrix metalloproteinase-10 levels	0.00135663	0.00170755	25.2158	41.8887	20.0266
rs12567824	A	C	A	C	0.07	0.00249688	0.822	0.8088	kidney cancer	0.9605	0.0504154	GCST90274827	1	159990022	0.0153	4.76e-06	1_159990022_A_C	14296	Matrix metalloproteinase-10 levels	0.00146226	0.0014339	20.5256	41.8887	20.9321
rs1356799	T	G	T	G	-0.069	-0.0702079	0.7974	0.7781	kidney cancer	0.1445	0.0481128	GCST90274827	2	140567666	0.015	4.22e-06	2_140567666_T_G	13869	Matrix metalloproteinase-10 levels	0.0015236	0.00153831	21.3646	41.8887	21.16
rs138847931	T	C	T	C	-0.3484	-0.296521	0.9866	0.98875	kidney cancer	0.1059	0.183389	GCST90274827	6	167150835	0.0769	5.88e-06	6_167150835_T_C	11439	Matrix metalloproteinase-10 levels	0.00179148	0.00320946	36.8248	41.8887	20.526
rs139747874	T	C	T	C	-0.2523	-0.0489802	0.9867	0.98773	kidney cancer	0.7707	0.168051	GCST90274827	20	37234290	0.0567	8.6e-06	20_37234290_T_C	13422	Matrix metalloproteinase-10 levels	0.00147325	0.00167071	22.4585	41.8887	19.8001
rs142915220	A	G	A	G	-0.3256	-0.0674227	0.9794	0.98262	kidney cancer	0.6554	0.151079	GCST90274827	11	102881952	0.0494	4.37e-11	11_102881952_A_G	13809	Matrix metalloproteinase-10 levels	0.00313654	0.00427785	59.3181	41.8887	43.4425
rs17099622	A	G	A	G	-0.2064	-0.0240878	0.9296	0.92434	kidney cancer	0.7486	0.0751602	GCST90274827	11	102700352	0.0233	8.12e-19	11_102700352_A_G	14296	Matrix metalloproteinase-10 levels	0.00545979	0.00557594	80.1494	41.8887	78.4707
rs17860955	T	C	T	C	1.1371	-0.173283	0.983	0.9816	kidney cancer	0.172	0.126872	GCST90274827	11	102649482	0.047	2.6e-129	11_102649482_T_C	14256	Matrix metalloproteinase-10 levels	0.0394446	0.0432145	643.801	41.8887	585.331
rs181816009	A	G	A	G	-0.1769	0.0546674	0.0368	0.02761	kidney cancer	0.6516	0.121069	GCST90274827	6	31423412	0.0358	7.76e-07	6_31423412_A_G	11985	Matrix metalloproteinase-10 levels	0.00203348	0.00221845	26.6428	41.8887	24.4168
rs192820441	A	G	A	G	0.2701	0.187475	0.9874	0.98671	kidney cancer	0.3877	0.217036	GCST90274827	12	117560675	0.0603	7.49e-06	12_117560675_A_G	13394	Matrix metalloproteinase-10 levels	0.00149596	0.00181528	24.3544	41.8887	20.0639
rs2584662	A	C	A	C	-0.0597	-0.0175532	0.585	0.5706	kidney cancer	0.6587	0.0397392	GCST90274827	17	47470487	0.0122	9.91e-07	17_47470487_A_C	14296	Matrix metalloproteinase-10 levels	0.00167243	0.00173054	24.7793	41.8887	23.9458
rs34387740	A	G	A	G	0.0845	-0.0381625	0.1751	0.1646	kidney cancer	0.5237	0.0598484	GCST90274827	9	136375396	0.019	8.69e-06	9_136375396_A_G	11345	Matrix metalloproteinase-10 levels	0.00174069	0.00206267	23.4453	41.8887	19.7791
rs3742926	T	C	T	C	-0.0912	0.0309748	0.0978	0.1033	kidney cancer	0.6405	0.0663272	GCST90274827	14	33014869	0.0196	3.27e-06	14_33014869_T_C	14744	Matrix metalloproteinase-10 levels	0.00146651	0.00146778	21.6698	41.8887	21.651
rs539147801	A	C	A	C	-0.2059	0.10661	0.9719	0.97546	kidney cancer	0.4248	0.133576	GCST90274827	10	13585421	0.0444	3.53e-06	10_13585421_A_C	11329	Matrix metalloproteinase-10 levels	0.001895	0.00231564	26.2901	41.8887	21.5054
rs55804377	A	G	A	G	-0.2185	-0.0923968	0.0185	0.02352	kidney cancer	0.5881	0.170602	GCST90274827	10	1063892	0.0469	3.18e-06	10_1063892_A_G	14741	Matrix metalloproteinase-10 levels	0.00147045	0.00173378	25.5986	41.8887	21.7049
rs55942631	T	G	T	G	0.1032	0.0724137	0.9147	0.92434	kidney cancer	0.3291	0.0741998	GCST90274827	8	99434029	0.023	7.22e-06	8_99434029_T_G	14296	Matrix metalloproteinase-10 levels	0.0014065	0.00166195	23.7954	41.8887	20.1328
rs72699188	C	G	C	G	-0.0931	-0.020713	0.8507	0.8364	kidney cancer	0.6913	0.0521619	GCST90274827	9	6176871	0.0166	2.04e-08	9_6176871_C_G	14744	Matrix metalloproteinase-10 levels	0.00212912	0.00220174	32.5296	41.8887	31.4545
rs7683424	A	G	A	G	0.054	-0.0482186	0.4046	0.3988	kidney cancer	0.2271	0.0399206	GCST90274827	4	187115945	0.0121	8.09e-06	4_187115945_A_G	14296	Matrix metalloproteinase-10 levels	0.00139142	0.00140492	20.1102	41.8887	19.9167
rs7966257	C	G	C	G	-0.0819	0.101368	0.1335	0.1564	kidney cancer	0.06947	0.0558396	GCST90274827	12	111251437	0.0178	4.2e-06	12_111251437_C_G	14295	Matrix metalloproteinase-10 levels	0.00147898	0.00155184	22.215	41.8887	21.1703
rs10412462	A	C	A	C	-0.1731	-0.0453557	0.0363	0.02965	kidney cancer	0.7036	0.119211	GCST90274828	19	14691684	0.0366	2.25e-06	19_14691684_A_C	11790	Neurturin levels	0.00189395	0.00209639	24.7642	41.8887	22.3682
rs113580784	A	G	A	G	-0.2288	-0.0643823	0.0208	0.02454	kidney cancer	0.7019	0.168207	GCST90274828	20	55469957	0.0495	3.8e-06	20_55469957_A_G	11768	Neurturin levels	0.00181253	0.00213244	25.1439	41.8887	21.3649
rs117216753	T	C	T	C	0.2114	-0.0446865	0.0291	0.02863	kidney cancer	0.7342	0.131607	GCST90274828	15	28183982	0.0475	8.57e-06	15_28183982_T_C	9339	Neurturin levels	0.00211687	0.00252527	23.6381	41.8887	19.8072
rs11766761	T	C	T	C	0.0729	-0.0328332	0.8184	0.8446	kidney cancer	0.526	0.0517772	GCST90274828	7	41670710	0.0165	9.95e-06	7_41670710_T_C	11783	Neurturin levels	0.00165419	0.00157967	18.6395	41.8887	19.5203
rs140212763	T	G	T	G	-0.1599	0.238623	0.9347	0.95501	kidney cancer	0.5315	0.381359	GCST90274828	13	19290907	0.0358	7.95e-06	13_19290907_T_G	8783	Neurturin levels	0.00226674	0.00312113	27.4925	41.8887	19.9494
rs143131035	T	C	T	C	-0.4361	-0.0282959	0.0118	0.01125	kidney cancer	0.894	0.21236	GCST90274828	4	43313220	0.0867	4.91e-07	4_43313220_T_C	7585	Neurturin levels	0.00332542	0.00443536	33.7832	41.8887	25.3008
rs148658700	A	T	A	T	-0.3205	0.109257	0.0145	0.01329	kidney cancer	0.5765	0.195624	GCST90274828	9	138510992	0.0713	6.95e-06	9_138510992_A_T	11343	Neurturin levels	0.00177849	0.00293569	33.3917	41.8887	20.2058
rs182274799	A	G	A	G	0.1565	-0.0343048	0.0646	0.08691	kidney cancer	0.6725	0.0811527	GCST90274828	11	10358788	0.031	4.46e-07	11_10358788_A_G	9461	Neurturin levels	0.00268715	0.00295998	28.0816	41.8887	25.4862
rs28572049	A	G	A	G	0.0707	0.0167588	0.2983	0.32	kidney cancer	0.8453	0.0858902	GCST90274828	15	95039717	0.016	9.93e-06	15_95039717_A_G	9461	Neurturin levels	0.00205996	0.00209254	19.8348	41.8887	19.5254
rs28759830	T	C	T	C	-0.1778	-0.0713886	0.9507	0.9499	kidney cancer	0.4409	0.0926313	GCST90274828	16	21786236	0.037	1.54e-06	16_21786236_T_C	9461	Neurturin levels	0.00243532	0.00296336	28.1137	41.8887	23.0919
rs29630	T	C	T	C	-0.074	0.00179838	0.2493	0.2362	kidney cancer	0.9672	0.0437347	GCST90274828	5	171026588	0.0159	3.25e-06	5_171026588_T_C	11343	Neurturin levels	0.00190629	0.00204966	23.293	41.8887	21.6605
rs4360502	A	G	A	G	-0.0652	0.0288111	0.3445	0.3548	kidney cancer	0.4829	0.0410621	GCST90274828	1	214886642	0.0141	3.76e-06	1_214886642_A_G	11342	Neurturin levels	0.00188203	0.00191994	21.814	41.8887	21.3824
rs4723879	A	G	A	G	-0.0722	0.0961806	0.2241	0.2454	kidney cancer	0.03902	0.0465997	GCST90274828	7	4596494	0.0163	9.45e-06	7_4596494_A_G	11343	Neurturin levels	0.00172702	0.00181281	20.5964	41.8887	19.62
rs61589891	A	G	A	G	-0.1563	0.0396768	0.0545	0.0501	kidney cancer	0.8434	0.200848	GCST90274828	6	73859555	0.0348	7.08e-06	6_73859555_A_G	9021	Neurturin levels	0.00223167	0.00251771	22.7646	41.8887	20.1725
rs62120726	A	G	A	G	0.0786	0.0558131	0.8077	0.8364	kidney cancer	0.2555	0.0490841	GCST90274828	2	15734798	0.0172	4.88e-06	2_15734798_A_G	11343	Neurturin levels	0.00183797	0.00191913	21.8067	41.8887	20.8828
rs7202385	A	T	A	T	0.0746	-0.0411419	0.6725	0.7106	kidney cancer	0.3294	0.0421829	GCST90274828	16	26080883	0.0157	2.02e-06	16_26080883_A_T	9460	Neurturin levels	0.00238146	0.00245138	23.2422	41.8887	22.5776
rs75066660	A	G	A	G	0.2148	-0.109572	0.0197	0.01636	kidney cancer	0.4906	0.158948	GCST90274828	5	92157390	0.0476	6.4e-06	5_92157390_A_G	11789	Neurturin levels	0.00172465	0.00178207	21.0427	41.8887	20.3636
rs76777800	T	C	T	C	0.3387	-0.123809	0.0176	0.01431	kidney cancer	0.5444	0.204248	GCST90274828	3	73067086	0.0738	4.44e-06	3_73067086_T_C	6941	Neurturin levels	0.00302625	0.00396699	27.6366	41.8887	21.0629
rs76807861	A	G	A	G	-0.2154	-0.0577027	0.023	0.01738	kidney cancer	0.6873	0.143353	GCST90274828	6	153460965	0.0486	9.33e-06	6_153460965_A_G	10901	Neurturin levels	0.00179908	0.00208518	22.7739	41.8887	19.6435
rs77216559	T	C	T	C	0.1667	0.0725067	0.958	0.96115	kidney cancer	0.509	0.109793	GCST90274828	11	4475910	0.034	9.44e-07	11_4475910_T_C	11791	Neurturin levels	0.00203494	0.00223623	26.422	41.8887	24.0388
rs8030121	A	G	A	G	0.0601	0.0546776	0.4519	0.4785	kidney cancer	0.1602	0.0389331	GCST90274828	15	51931074	0.0136	9.91e-06	15_51931074_A_G	11343	Neurturin levels	0.00171899	0.00178929	20.3287	41.8887	19.5286
rs8033310	T	C	T	C	0.1332	-0.365139	0.9133	0.93661	kidney cancer	0.008009	0.137701	GCST90274828	15	24046105	0.0286	3.2e-06	15_24046105_T_C	11343	Neurturin levels	0.00190895	0.00280977	31.9554	41.8887	21.6908
rs908372	C	G	C	G	-0.0622	0.00468899	0.3324	0.3436	kidney cancer	0.9106	0.0417609	GCST90274828	2	172434373	0.0136	4.8e-06	2_172434373_C_G	11773	Neurturin levels	0.00177386	0.00171707	20.2464	41.8887	20.9172
rs1009409	T	G	T	G	0.0552	-0.075293	0.3857	0.4284	kidney cancer	0.06344	0.0405653	GCST90274829	13	69789253	0.0121	5.07e-06	13_69789253_T_G	14295	Neurotrophin-3 levels	0.00145396	0.0014439	20.6676	41.8887	20.8117
rs10121142	A	T	A	T	-0.0633	0.0393169	0.263	0.2658	kidney cancer	0.3824	0.0450116	GCST90274829	9	32900305	0.0139	5.26e-06	9_32900305_A_T	12844	Neurotrophin-3 levels	0.00161229	0.00155332	19.9788	41.8887	20.7385
rs1017982	A	G	A	G	0.0623	0.065499	0.2606	0.2679	kidney cancer	0.496	0.0962093	GCST90274829	1	238095957	0.014	8.59e-06	1_238095957_A_G	14296	Neurotrophin-3 levels	0.00138346	0.00149575	21.4123	41.8887	19.8025
rs10780690	T	G	T	G	0.0557	0.0172504	0.5265	0.5143	kidney cancer	0.659	0.0390904	GCST90274829	9	87478172	0.012	3.46e-06	9_87478172_T_G	14296	Neurotrophin-3 levels	0.00150501	0.00154689	22.1455	41.8887	21.5451
rs111981019	A	C	A	C	-0.2188	-0.106583	0.9635	0.97853	kidney cancer	0.5449	0.176049	GCST90274829	4	158274860	0.0495	9.86e-06	4_158274860_A_C	12800	Neurotrophin-3 levels	0.00152433	0.0033672	43.2391	41.8887	19.5382
rs11225042	A	C	A	C	-0.0973	-0.0712812	0.8737	0.8988	kidney cancer	0.6895	0.178411	GCST90274829	11	101727684	0.0203	1.64e-06	11_101727684_A_C	12412	Neurotrophin-3 levels	0.00184782	0.0020894	25.9837	41.8887	22.9738
rs112418830	T	C	T	C	0.1366	-0.0742722	0.0567	0.05317	kidney cancer	0.4004	0.088324	GCST90274829	6	151293888	0.0263	2.06e-07	6_151293888_T_C	14296	Neurotrophin-3 levels	0.00188372	0.00199602	28.5881	41.8887	26.9768
rs116906009	T	C	T	C	-0.1839	-0.0747235	0.9745	0.98262	kidney cancer	0.5403	0.122026	GCST90274829	12	118360925	0.041	7.28e-06	12_118360925_T_C	14727	Neurotrophin-3 levels	0.00136442	0.0016808	24.7914	41.8887	20.1185
rs11756802	A	T	A	T	-0.1414	0.141909	0.0444	0.04499	kidney cancer	0.1249	0.0924775	GCST90274829	6	7170084	0.0319	9.31e-06	6_7170084_A_T	14296	Neurotrophin-3 levels	0.00137267	0.00169663	24.2929	41.8887	19.648
rs12517801	A	G	A	G	-0.0555	-0.0918497	0.3609	0.3098	kidney cancer	0.05222	0.0473131	GCST90274829	5	1731054	0.0121	4.5e-06	5_1731054_A_G	14726	Neurotrophin-3 levels	0.00142682	0.00142093	20.9515	41.8887	21.0385
rs145686993	C	G	C	G	-0.2464	0.118784	0.0161	0.01227	kidney cancer	0.7392	0.356801	GCST90274829	2	46306174	0.0539	4.84e-06	2_46306174_C_G	14257	Neurotrophin-3 levels	0.00146386	0.00192348	27.4721	41.8887	20.898
rs146532158	T	C	T	C	-0.1859	0.00280393	0.0249	0.01943	kidney cancer	0.9829	0.130821	GCST90274829	10	115833862	0.0386	1.46e-06	10_115833862_T_C	14741	Neurotrophin-3 levels	0.00157121	0.00167818	24.7762	41.8887	23.1945
rs17537796	A	C	A	C	-0.2571	0.0824091	0.9866	0.98875	kidney cancer	0.656	0.185005	GCST90274829	7	40026172	0.0553	3.33e-06	7_40026172_A_C	14254	Neurotrophin-3 levels	0.00151433	0.00174775	24.9526	41.8887	21.6149
rs185208766	T	C	T	C	0.3291	-0.245688	0.0142	0.01329	kidney cancer	0.3535	0.2648	GCST90274829	3	73021223	0.0722	5.16e-06	3_73021223_T_C	9893	Neurotrophin-3 levels	0.00209619	0.00303223	30.0831	41.8887	20.7769
rs188129302	T	C	T	C	-0.2607	-0.118227	0.018	0.01329	kidney cancer	0.5075	0.178393	GCST90274829	5	146781995	0.0577	6.24e-06	5_146781995_T_C	12412	Neurotrophin-3 levels	0.00164227	0.00240268	29.8891	41.8887	20.4141
rs2034246	A	C	A	C	0.0582	-0.131819	0.5677	0.5736	kidney cancer	0.0006918	0.0388523	GCST90274829	5	114451587	0.012	1.23e-06	5_114451587_A_C	14296	Neurotrophin-3 levels	0.00164292	0.00166257	23.8044	41.8887	23.5225
rs2107473	A	G	A	G	-0.2393	0.0376811	0.0175	0.01534	kidney cancer	0.801	0.149497	GCST90274829	7	8762956	0.0507	2.36e-06	7_8762956_A_G	13394	Neurotrophin-3 levels	0.00166074	0.00196918	26.4233	41.8887	22.2777
rs2213143	T	C	T	C	-0.1139	-0.0423857	0.0687	0.08078	kidney cancer	0.5858	0.0777816	GCST90274829	22	22401216	0.0253	6.73e-06	22_22401216_T_C	14296	Neurotrophin-3 levels	0.00141592	0.00166006	23.7684	41.8887	20.2678
rs255889	A	G	A	G	-0.0937	0.005286	0.9203	0.9274	kidney cancer	0.9426	0.0734143	GCST90274829	5	111111113	0.0212	9.88e-06	5_111111113_A_G	14731	Neurotrophin-3 levels	0.00132452	0.00128794	18.9946	41.8887	19.5347
rs2846299	A	G	A	G	0.0582	0.113061	0.3022	0.2955	kidney cancer	0.006709	0.0417052	GCST90274829	11	123375056	0.0125	3.22e-06	11_123375056_A_G	14721	Neurotrophin-3 levels	0.00147065	0.00142857	21.0572	41.8887	21.6783
rs28735437	C	G	C	G	-0.1168	-0.0166604	0.1435	0.1319	kidney cancer	0.7666	0.0561288	GCST90274829	15	88514855	0.0164	1.06e-12	15_88514855_C_G	14737	Neurotrophin-3 levels	0.00343048	0.00335347	49.5797	41.8887	50.7222
rs3218587	A	G	A	G	0.1364	0.00883895	0.0429	0.04908	kidney cancer	0.9304	0.1012	GCST90274829	6	111688927	0.0294	3.49e-06	6_111688927_A_G	14744	Neurotrophin-3 levels	0.00145795	0.00152782	22.5576	41.8887	21.5245
rs5751454	T	C	T	C	0.1823	0.204444	0.0287	0.02352	kidney cancer	0.1214	0.131991	GCST90274829	22	43649715	0.0398	4.64e-06	22_43649715_T_C	13680	Neurotrophin-3 levels	0.00153151	0.00185284	25.3902	41.8887	20.9801
rs58399805	A	T	A	T	0.1106	-0.0506931	0.0799	0.06953	kidney cancer	0.5472	0.0842133	GCST90274829	12	5680104	0.022	4.98e-07	12_5680104_A_T	14737	Neurotrophin-3 levels	0.00171226	0.00179855	26.5494	41.8887	25.2735
rs7250584	T	C	T	C	-0.117	-0.118672	0.0529	0.05726	kidney cancer	0.1775	0.0880031	GCST90274829	19	8335689	0.026	6.8e-06	19_8335689_T_C	14743	Neurotrophin-3 levels	0.00137184	0.00137168	20.2477	41.8887	20.25
rs72652073	C	G	C	G	0.058	0.0237805	0.3811	0.3906	kidney cancer	0.7797	0.0850185	GCST90274829	8	72031901	0.0125	3.48e-06	8_72031901_C_G	14296	Neurotrophin-3 levels	0.00150393	0.00158688	22.719	41.8887	21.5296
rs73166403	T	C	T	C	-0.092	0.0708517	0.1114	0.1033	kidney cancer	0.237	0.059916	GCST90274829	7	152298228	0.02	4.22e-06	7_152298228_T_C	14296	Neurotrophin-3 levels	0.00147815	0.0016757	23.9927	41.8887	21.16
rs77109322	T	C	T	C	0.1398	-0.00925702	0.0423	0.0409	kidney cancer	0.9268	0.10076	GCST90274829	2	240277019	0.0313	7.95e-06	2_240277019_T_C	14744	Neurotrophin-3 levels	0.00135139	0.00158349	23.3808	41.8887	19.9492
rs79759094	A	G	A	G	-0.1163	0.0107577	0.0638	0.0593	kidney cancer	0.9017	0.0870966	GCST90274829	4	7533099	0.0251	3.6e-06	4_7533099_A_G	14728	Neurotrophin-3 levels	0.00145578	0.00161577	23.8323	41.8887	21.469
rs871910	T	C	T	C	-0.0632	-0.131467	0.2256	0.2311	kidney cancer	0.008312	0.0498145	GCST90274829	10	7026672	0.0141	7.39e-06	10_7026672_T_C	14296	Neurotrophin-3 levels	0.00140356	0.00139562	19.9769	41.8887	20.0907
rs10142466	A	G	A	G	0.057	-0.0628333	0.49	0.4796	kidney cancer	0.1067	0.0389494	GCST90274830	14	69271784	0.0109	1.7e-07	14_69271784_A_G	14721	Osteoprotegerin levels	0.00185444	0.00162385	23.9403	41.8887	27.3462
rs112635299	T	G	T	G	0.2618	0.0504515	0.0205	0.01738	kidney cancer	0.7082	0.134798	GCST90274830	14	94838142	0.0433	1.48e-09	14_94838142_T_G	14733	Osteoprotegerin levels	0.00247545	0.0027525	40.659	41.8887	36.5564
rs114165349	C	G	C	G	-0.1948	0.236609	0.0337	0.02147	kidney cancer	0.03401	0.11161	GCST90274830	1	27021913	0.034	1.01e-08	1_27021913_C_G	14727	Osteoprotegerin levels	0.00222432	0.00247144	36.4821	41.8887	32.8262
rs114805200	C	G	C	G	-0.2032	-0.0973923	0.9827	0.98875	kidney cancer	0.4962	0.143123	GCST90274830	2	155956833	0.0455	7.97e-06	2_155956833_C_G	14285	Osteoprotegerin levels	0.00139444	0.00140393	20.0805	41.8887	19.9446
rs1230164	C	G	C	G	-0.0671	0.0120726	0.7288	0.7117	kidney cancer	0.7824	0.0437107	GCST90274830	4	99986023	0.0129	1.98e-07	4_99986023_C_G	14285	Osteoprotegerin levels	0.00189071	0.00177981	25.4663	41.8887	27.0561
rs12637074	T	C	T	C	-0.0712	-0.0498207	0.8414	0.865	kidney cancer	0.3941	0.0584609	GCST90274830	3	32324460	0.0158	6.6e-06	3_32324460_T_C	14708	Osteoprotegerin levels	0.00137896	0.00135299	19.9241	41.8887	20.307
rs138408096	A	G	A	G	-0.2007	0.124657	0.0206	0.01329	kidney cancer	0.416	0.153257	GCST90274830	15	84250648	0.0423	2.09e-06	15_84250648_A_G	14721	Osteoprotegerin levels	0.00152712	0.00162537	23.9628	41.8887	22.512
rs138557324	T	C	T	C	-0.2253	-0.167885	0.0196	0.02147	kidney cancer	0.3031	0.163025	GCST90274830	12	119984130	0.0473	1.91e-06	12_119984130_T_C	14285	Osteoprotegerin levels	0.00158596	0.0019508	27.9177	41.8887	22.6882
rs1437633	A	C	A	C	-0.079	0.0212721	0.2072	0.2045	kidney cancer	0.6527	0.0472699	GCST90274830	11	16272199	0.0147	7.69e-08	11_16272199_A_C	12851	Osteoprotegerin levels	0.00224272	0.00205039	26.3997	41.8887	28.8815
rs144471361	T	C	T	C	0.3067	0.308157	0.0154	0.01738	kidney cancer	0.1005	0.187622	GCST90274830	6	134519823	0.0628	1.04e-06	6_134519823_T_C	12145	Osteoprotegerin levels	0.00196033	0.00285258	34.738	41.8887	23.8511
rs17396131	A	G	A	G	0.0562	-0.0619414	0.3327	0.3681	kidney cancer	0.4683	0.0854072	GCST90274830	1	55145897	0.0125	6.92e-06	1_55145897_A_G	14285	Osteoprotegerin levels	0.00141325	0.00140241	20.0588	41.8887	20.214
rs17600346	T	C	T	C	-0.1569	-0.030253	0.9631	0.96626	kidney cancer	0.7552	0.0970301	GCST90274830	3	172223982	0.0299	1.54e-07	3_172223982_T_C	14723	Osteoprotegerin levels	0.00186704	0.00174974	25.8031	41.8887	27.5362
rs192337992	A	G	A	G	-0.1555	0.118494	0.962	0.95399	kidney cancer	0.2653	0.106373	GCST90274830	6	130506773	0.0334	3.23e-06	6_130506773_A_G	11978	Osteoprotegerin levels	0.00180664	0.00176787	21.2095	41.8887	21.6754
rs2247769	T	C	T	C	-0.1705	0.0330479	0.5577	0.5552	kidney cancer	0.4028	0.0395011	GCST90274830	8	120081031	0.0114	1.42e-50	8_120081031_T_C	14285	Osteoprotegerin levels	0.0154195	0.0143416	207.821	41.8887	223.686
rs271665	T	C	T	C	-0.0672	-0.0466724	0.748	0.7853	kidney cancer	0.3126	0.0462203	GCST90274830	17	47938521	0.0129	1.9e-07	17_47938521_T_C	14710	Osteoprotegerin levels	0.00184164	0.00170244	25.0821	41.8887	27.1368
rs28454196	C	G	C	G	-0.2242	0.108765	0.9758	0.98364	kidney cancer	0.8331	0.516139	GCST90274830	4	32870458	0.0486	3.97e-06	4_32870458_C_G	14285	Osteoprotegerin levels	0.00148776	0.00237398	33.9883	41.8887	21.2813
rs376613127	A	G	A	G	-0.2692	0.127947	0.0133	0.0184	kidney cancer	0.5332	0.20533	GCST90274830	12	71789031	0.0568	2.14e-06	12_71789031_A_G	13154	Osteoprotegerin levels	0.00170499	0.00190203	25.0631	41.8887	22.4623
rs55784633	A	C	A	C	-0.076	-0.0717624	0.8345	0.8098	kidney cancer	0.2146	0.0578255	GCST90274830	4	190049910	0.0167	5.34e-06	4_190049910_A_C	11760	Osteoprotegerin levels	0.00175831	0.00159544	18.7892	41.8887	20.7107
rs56009454	T	G	T	G	-0.0637	0.112793	0.3753	0.4018	kidney cancer	0.01373	0.0457717	GCST90274830	1	40045085	0.0139	4.59e-06	1_40045085_T_G	10894	Osteoprotegerin levels	0.00192444	0.00190265	20.7632	41.8887	21.0014
rs61968587	A	G	A	G	-0.2671	0.524906	0.9843	0.98773	kidney cancer	0.02609	0.235927	GCST90274830	13	109537182	0.0567	2.47e-06	13_109537182_A_G	13798	Osteoprotegerin levels	0.00160594	0.00220498	30.4871	41.8887	22.1912
rs6506157	A	G	A	G	0.0642	0.00060018	0.7937	0.7955	kidney cancer	0.9901	0.0483699	GCST90274830	18	4040656	0.0144	8.26e-06	18_4040656_A_G	14285	Osteoprotegerin levels	0.0013897	0.00134976	19.3046	41.8887	19.8767
rs6985207	A	C	A	C	0.0522	0.110378	0.5556	0.5337	kidney cancer	0.005068	0.039383	GCST90274830	8	8604423	0.0114	4.67e-06	8_8604423_A_C	14285	Osteoprotegerin levels	0.0014658	0.00134557	19.2447	41.8887	20.9668
rs704	A	G	A	G	-0.1404	-0.0824091	0.4726	0.4519	kidney cancer	0.03557	0.0392087	GCST90274830	17	26694861	0.0111	1.14e-36	17_26694861_A_G	14733	Osteoprotegerin levels	0.010744	0.00982648	146.19	41.8887	159.988
rs74111611	T	C	T	C	-0.1471	-0.00220242	0.9603	0.97546	kidney cancer	0.9826	0.100985	GCST90274830	12	85607051	0.0298	7.96e-07	12_85607051_T_C	14732	Osteoprotegerin levels	0.00165148	0.00164988	24.3429	41.8887	24.3665
rs74627924	A	G	A	G	-0.0827	0.0693395	0.8883	0.8875	kidney cancer	0.2808	0.0642911	GCST90274830	2	145820726	0.0183	6.21e-06	2_145820726_A_G	14710	Osteoprotegerin levels	0.0013866	0.00135723	19.9893	41.8887	20.4225
rs75064915	A	T	A	T	-0.1311	0.0895965	0.0452	0.04703	kidney cancer	0.3156	0.0892804	GCST90274830	2	223274212	0.0295	8.83e-06	2_223274212_A_T	14730	Osteoprotegerin levels	0.00133917	0.0014835	21.8814	41.8887	19.7497
rs7703177	T	C	T	C	0.053	-0.0391567	0.5883	0.5552	kidney cancer	0.6271	0.0806004	GCST90274830	5	52799456	0.0117	5.9e-06	5_52799456_T_C	14285	Osteoprotegerin levels	0.00143462	0.0013607	19.4613	41.8887	20.5201
rs77507094	A	G	A	G	0.1965	0.0117309	0.9791	0.97137	kidney cancer	0.9367	0.147711	GCST90274830	10	55029035	0.0429	4.64e-06	10_55029035_A_G	14726	Osteoprotegerin levels	0.00142287	0.00158026	23.3046	41.8887	20.9802
rs928835	A	T	A	T	0.1047	0.0609069	0.934	0.92127	kidney cancer	0.4216	0.075788	GCST90274830	21	21116259	0.0237	9.97e-06	21_21116259_A_T	14717	Osteoprotegerin levels	0.00132453	0.00135149	19.9142	41.8887	19.5163
rs9946923	T	C	T	C	0.172	-0.154317	0.9707	0.97853	kidney cancer	0.1424	0.105199	GCST90274830	18	76523646	0.0376	4.77e-06	18_76523646_T_C	13230	Osteoprotegerin levels	0.00157943	0.00168283	22.298	41.8887	20.9258
rs111827930	A	G	A	G	-0.061	-0.0677521	0.2479	0.271	kidney cancer	0.1369	0.0455496	GCST90274831	13	51453936	0.0138	9.86e-06	13_51453936_A_G	14288	Oncostatin-M levels	0.00136583	0.00138753	19.8498	41.8887	19.539
rs114931601	A	G	A	G	0.1125	-0.173045	0.9343	0.93865	kidney cancer	0.02057	0.074724	GCST90274831	3	26561369	0.0254	9.46e-06	3_26561369_A_G	14288	Oncostatin-M levels	0.0013713	0.00155377	22.2317	41.8887	19.6172
[truncated: 545 more rows]
