# Supplementary material for: Genetically predicted 91 circulating inflammatory proteins in relation to risk of urological malignancies: a Mendelian randomization study
Source: Aging (Albany NY). 2024 Jun 13;16(12):10366–79. doi: 10.18632/aging.205934 (PMC11236305; doi:10.18632/aging.205934)
Supplement: Supplementary Table 2 [file aging-16-205934-s003.xlsx]

## Sheet: Sheet1
Supplementary Table 2. Detailed information of genetic instruments of 91 plasma proteins for effect on bladder cancer.
SNP	effect_allele.exposure	other_allele.exposure	effect_allele.outcome	other_allele.outcome	beta.exposure	beta.outcome	eaf.exposure	eaf.outcome	outcome	se.outcome	pval.outcome	id.exposure	chr.exposure	pos.exposure	se.exposure	pval.exposure	var_id	samplesize.exposure	exposure	rsq.exposure	R2	F	FMean	F_pow_beta_se
rs10513018	A	G	A	G	-0.0875	-0.0203657	0.8986	0.892772	Bladder cancer	0.0830893	0.806374	GCST90274758	3	136674468	0.0197	8.93e-06	3_136674468_A_G	14288	Eukaryotic translation initiation factor 4E-binding protein 1 levels	0.00137903	0.00139525	19.9603	42.6787	19.728
rs10792025	T	C	T	C	-0.0593	0.0182014	0.3383	0.357808	Bladder cancer	0.0536124	0.734234	GCST90274758	11	68921211	0.0124	1.73e-06	11_68921211_T_C	14727	Eukaryotic translation initiation factor 4E-binding protein 1 levels	0.00155073	0.00157435	23.2189	42.6787	22.87
rs112020430	T	C	T	C	0.1784	0.108743	0.0251	0.0270791	Bladder cancer	0.159114	0.494337	GCST90274758	4	117584424	0.0403	9.56e-06	4_117584424_T_C	14735	Eukaryotic translation initiation factor 4E-binding protein 1 levels	0.00132835	0.00155759	22.9838	42.6787	19.5965
rs115454951	A	C	A	C	-0.1537	0.0662425	0.0384	0.0439323	Bladder cancer	0.12473	0.595358	GCST90274758	1	108736338	0.0344	7.89e-06	1_108736338_A_C	11982	Eukaryotic translation initiation factor 4E-binding protein 1 levels	0.00166361	0.00174463	20.9372	42.6787	19.9632
rs137887001	C	G	C	G	0.2235	-0.0165438	0.9827	0.982308	Bladder cancer	0.195776	0.932656	GCST90274758	20	44566861	0.0486	4.25e-06	20_44566861_C_G	14288	Eukaryotic translation initiation factor 4E-binding protein 1 levels	0.00147819	0.00169845	24.3053	42.6787	21.1486
rs139951113	T	C	T	C	0.3201	0.812026	0.0087	0.00544251	Bladder cancer	0.347691	0.0195184	GCST90274758	3	6066466	0.0722	9.27e-06	3_6066466_T_C	12935	Eukaryotic translation initiation factor 4E-binding protein 1 levels	0.00151753	0.00176736	22.8978	42.6787	19.6561
rs181095999	T	C	T	C	-0.2226	0.267913	0.0227	0.014268	Bladder cancer	0.218608	0.22037	GCST90274758	12	23923166	0.0474	2.65e-06	12_23923166_T_C	14736	Eukaryotic translation initiation factor 4E-binding protein 1 levels	0.0014946	0.00219854	32.4646	42.6787	22.0543
rs2731672	T	C	T	C	0.0926	0.0735865	0.2679	0.255482	Bladder cancer	0.0587068	0.210039	GCST90274758	5	176842474	0.0152	1.11e-09	5_176842474_T_C	11783	Eukaryotic translation initiation factor 4E-binding protein 1 levels	0.00314041	0.00336353	39.7595	42.6787	37.1137
rs2856226	T	C	T	C	-0.0995	0.048572	0.8975	0.907771	Bladder cancer	0.0898355	0.58873	GCST90274758	17	15470414	0.0214	3.33e-06	17_15470414_T_C	12404	Eukaryotic translation initiation factor 4E-binding protein 1 levels	0.00174008	0.00182152	22.6317	42.6787	21.6182
rs356283	T	G	T	G	0.0588	-0.0660456	0.6475	0.632094	Bladder cancer	0.0535187	0.217178	GCST90274758	1	80975190	0.0123	1.75e-06	1_80975190_T_G	14730	Eukaryotic translation initiation factor 4E-binding protein 1 levels	0.00154927	0.00157828	23.2816	42.6787	22.8531
rs3733402	A	G	A	G	-0.1305	-0.0479276	0.5102	0.512446	Bladder cancer	0.0512771	0.349954	GCST90274758	4	187158034	0.0116	2.32e-29	4_187158034_A_G	14736	Eukaryotic translation initiation factor 4E-binding protein 1 levels	0.00851667	0.00851158	126.486	42.6787	126.562
rs5030072	T	C	T	C	0.0594	0.0161355	0.5711	0.569918	Bladder cancer	0.0522378	0.757408	GCST90274758	3	186455546	0.0119	5.99e-07	3_186455546_T_C	14716	Eukaryotic translation initiation factor 4E-binding protein 1 levels	0.00169049	0.00172851	25.4773	42.6787	24.916
rs60037565	A	T	A	T	0.0772	-0.0246144	0.8011	0.815171	Bladder cancer	0.0666032	0.711705	GCST90274758	17	74618280	0.0172	7.18e-06	17_74618280_A_T	11337	Eukaryotic translation initiation factor 4E-binding protein 1 levels	0.00177413	0.00189927	21.5692	42.6787	20.1455
rs7490744	T	G	T	G	0.0705	0.106192	0.2217	0.228686	Bladder cancer	0.0614803	0.084121	GCST90274758	13	84976969	0.0159	9.25e-06	13_84976969_T_G	11783	Eukaryotic translation initiation factor 4E-binding protein 1 levels	0.00166601	0.00171522	20.2418	42.6787	19.66
rs76686678	T	G	T	G	0.2607	0.413916	0.015	0.0138322	Bladder cancer	0.218535	0.0582178	GCST90274758	2	38198906	0.0521	5.62e-07	2_38198906_T_G	14730	Eukaryotic translation initiation factor 4E-binding protein 1 levels	0.00169717	0.00200835	29.6385	42.6787	25.0384
rs78948504	C	G	C	G	-0.1269	0.0612036	0.9352	0.939123	Bladder cancer	0.107524	0.569216	GCST90274758	8	3936170	0.0281	6.3e-06	8_3936170_C_G	11781	Eukaryotic translation initiation factor 4E-binding protein 1 levels	0.00172843	0.00195179	23.0351	42.6787	20.3944
rs112351694	C	G	C	G	0.8874	-0.114619	0.0514	0.0463588	Bladder cancer	0.12212	0.347948	GCST90274759	20	43250424	0.0253	1.62e-269	20_43250424_C_G	14729	Adenosine Deaminase levels	0.0770973	0.0767918	1224.98	42.6787	1230.26
rs62319742	A	G	A	G	-0.1228	0.181267	0.055	0.0536559	Bladder cancer	0.113385	0.109891	GCST90274759	4	124581262	0.0257	1.77e-06	4_124581262_A_G	14730	Adenosine Deaminase levels	0.0015478	0.00156755	23.1231	42.6787	22.8313
rs7793526	A	G	A	G	-0.0592	-0.0184068	0.3435	0.357884	Bladder cancer	0.0536278	0.731424	GCST90274759	7	22805608	0.0122	1.22e-06	7_22805608_A_G	14732	Adenosine Deaminase levels	0.00159598	0.00158065	23.3198	42.6787	23.5464
rs80212763	T	C	T	C	0.9687	-0.102545	0.0189	0.0174943	Bladder cancer	0.1956	0.600098	GCST90274759	20	43223930	0.0448	1.1e-103	20_43223930_T_C	14249	Adenosine Deaminase levels	0.0317743	0.0348004	513.677	42.6787	467.544
rs10799609	T	C	T	C	-0.1321	0.0923606	0.0561	0.0477922	Bladder cancer	0.120247	0.442433	GCST90274760	1	20418323	0.0293	6.53e-06	1_20418323_T_C	11778	Artemin levels	0.00172315	0.0018481	21.8035	42.6787	20.3269
rs114907684	T	C	T	C	-0.3648	-0.0138528	0.9881	0.992742	Bladder cancer	0.304886	0.96376	GCST90274760	16	81582982	0.0818	8.21e-06	16_81582982_T_C	8283	Artemin levels	0.00239595	0.00312959	25.9975	42.6787	19.8885
rs118087756	A	G	A	G	-0.4237	-0.0394922	0.0108	0.00545539	Bladder cancer	0.346677	0.909304	GCST90274760	6	94484664	0.094	6.56e-06	6_94484664_A_G	8024	Artemin levels	0.00252627	0.00383579	30.8892	42.6787	20.3171
rs118115625	T	C	T	C	0.1703	0.163162	0.0344	0.036928	Bladder cancer	0.137605	0.235731	GCST90274760	12	81724190	0.0362	2.55e-06	12_81724190_T_C	11778	Artemin levels	0.00187585	0.0019267	22.7327	42.6787	22.1316
rs12699544	A	G	A	G	0.0803	0.0732945	0.1536	0.152208	Bladder cancer	0.0719995	0.308684	GCST90274760	7	13780997	0.0181	9.14e-06	7_13780997_A_G	11777	Artemin levels	0.00166874	0.00167659	19.7751	42.6787	19.6822
rs1329733	A	G	A	G	-0.0674	0.0482709	0.5323	0.525353	Bladder cancer	0.0515667	0.349229	GCST90274760	9	92208227	0.0136	7.2e-07	9_92208227_A_G	11330	Artemin levels	0.00216346	0.0022619	25.6809	42.6787	24.5608
rs13303278	A	C	A	C	-0.0664	-0.0480933	0.5539	0.569335	Bladder cancer	0.0523998	0.358716	GCST90274760	1	921716	0.0144	4.01e-06	1_921716_A_C	10265	Artemin levels	0.00206746	0.00217886	22.4105	42.6787	21.2623
rs1370215	T	C	T	C	-0.07	0.051197	0.7417	0.762631	Bladder cancer	0.0609633	0.40102	GCST90274760	18	54688939	0.0153	4.76e-06	18_54688939_T_C	11330	Artemin levels	0.00184441	0.0018775	21.3083	42.6787	20.9321
rs138311590	A	G	A	G	-0.0811	0.0318813	0.84	0.847763	Bladder cancer	0.0714861	0.655613	GCST90274760	4	4424044	0.0176	4.07e-06	4_4424044_A_G	11758	Artemin levels	0.00180291	0.00176795	20.8209	42.6787	21.2332
rs141625055	A	G	A	G	0.1852	0.0311014	0.0327	0.0220597	Bladder cancer	0.173989	0.85813	GCST90274760	2	142183922	0.0418	9.4e-06	2_142183922_A_G	11765	Artemin levels	0.00166605	0.00216981	25.5789	42.6787	19.6304
rs142970662	A	G	A	G	0.311	0.226175	0.0191	0.00888921	Bladder cancer	0.278111	0.416073	GCST90274760	7	106961661	0.0639	1.13e-06	7_106961661_A_G	9834	Artemin levels	0.00240343	0.00362417	35.7625	42.6787	23.6875
rs148226005	A	G	A	G	0.2112	0.124016	0.9758	0.98217	Bladder cancer	0.197303	0.529641	GCST90274760	12	130004146	0.0451	2.83e-06	12_130004146_A_G	11765	Artemin levels	0.00186083	0.00210666	24.8329	42.6787	21.9298
rs17340161	A	G	A	G	-0.0873	0.0627812	0.8494	0.843575	Bladder cancer	0.0707728	0.375035	GCST90274760	5	103466564	0.0189	3.86e-06	5_103466564_A_G	11330	Artemin levels	0.0018799	0.00194983	22.1308	42.6787	21.3356
rs17491469	A	G	A	G	-0.0897	-0.00739163	0.1327	0.140519	Bladder cancer	0.0746542	0.921129	GCST90274760	3	189164574	0.0197	5.28e-06	3_189164574_A_G	11777	Artemin levels	0.00175763	0.00185206	21.8485	42.6787	20.7325
rs3003450	T	G	T	G	0.0632	0.0503309	0.6627	0.663749	Bladder cancer	0.0545959	0.356591	GCST90274760	1	17628383	0.0137	3.97e-06	1_17628383_T_G	11762	Artemin levels	0.00180634	0.00178565	21.0369	42.6787	21.281
rs4561132	A	G	A	G	-0.0716	-0.0530718	0.2386	0.226329	Bladder cancer	0.0617315	0.389943	GCST90274760	10	97678022	0.0159	6.7e-06	10_97678022_A_G	11329	Artemin levels	0.00178706	0.00186268	21.138	42.6787	20.2783
rs4740350	A	G	A	G	0.0877	-0.0518235	0.1326	0.11776	Bladder cancer	0.0797715	0.515919	GCST90274760	9	133454106	0.0194	6.17e-06	9_133454106_A_G	11778	Artemin levels	0.00173239	0.00176926	20.8718	42.6787	20.436
rs4993886	A	T	A	T	-0.079	-0.135046	0.6759	0.667704	Bladder cancer	0.054952	0.0139899	GCST90274760	8	3686552	0.0162	1.08e-06	8_3686552_A_T	8371	Artemin levels	0.00283347	0.0027343	22.9461	42.6787	23.7807
rs55885546	A	G	A	G	-0.2047	-0.0544325	0.0245	0.021889	Bladder cancer	0.176895	0.758302	GCST90274760	8	19493177	0.044	3.28e-06	8_19493177_A_G	11778	Artemin levels	0.00183457	0.0020029	23.6335	42.6787	21.6436
rs569463048	T	G	T	G	-0.2687	0.0240318	0.028	0.0162566	Bladder cancer	0.205298	0.906814	GCST90274760	11	112934470	0.0588	4.88e-06	11_112934470_T_G	7943	Artemin levels	0.0026228	0.00392997	31.331	42.6787	20.8824
rs59142746	A	G	A	G	-0.1495	-0.101979	0.0532	0.0558201	Bladder cancer	0.11214	0.363144	GCST90274760	3	93510228	0.0335	8.09e-06	3_93510228_A_G	9453	Artemin levels	0.00210281	0.00225155	21.3275	42.6787	19.9156
rs62277657	A	G	A	G	0.0833	0.0156053	0.1972	0.213768	Bladder cancer	0.0624671	0.80273	GCST90274760	3	111720183	0.0166	5.22e-07	3_111720183_A_G	11777	Artemin levels	0.00213395	0.00219702	25.9269	42.6787	25.181
rs6509909	C	G	C	G	-0.0881	0.000543295	0.8122	0.822248	Bladder cancer	0.0678355	0.99361	GCST90274760	19	55422034	0.0176	5.57e-07	19_55422034_C_G	11330	Artemin levels	0.00220706	0.00236777	26.8858	42.6787	25.0569
rs74383279	C	G	C	G	-0.1899	0.0187158	0.9634	0.981387	Bladder cancer	0.192551	0.922568	GCST90274760	8	112086697	0.0421	6.46e-06	8_112086697_C_G	11761	Artemin levels	0.00172729	0.00254312	29.9808	42.6787	20.3463
rs76672219	A	C	A	C	-0.3226	0.0157082	0.9882	0.990774	Bladder cancer	0.266818	0.953054	GCST90274760	1	225057589	0.0682	2.24e-06	1_225057589_A_C	11291	Artemin levels	0.00197808	0.00242709	27.4661	42.6787	22.3748
rs77502336	C	G	C	G	0.0679	-0.071203	0.318	0.329166	Bladder cancer	0.0549787	0.195285	GCST90274760	11	123394636	0.0141	1.47e-06	11_123394636_C_G	11775	Artemin levels	0.00196589	0.00199978	23.5905	42.6787	23.19
rs79259958	T	C	T	C	-0.3099	0.0491808	0.0147	0.0107192	Bladder cancer	0.249891	0.843977	GCST90274760	4	40380879	0.0697	8.74e-06	4_40380879_T_C	9945	Artemin levels	0.00198425	0.00278201	27.7387	42.6787	19.7687
rs79664530	C	G	C	G	-0.3211	0.177094	0.0125	0.00699466	Bladder cancer	0.31461	0.573503	GCST90274760	1	197189391	0.0718	7.74e-06	1_197189391_C_G	10843	Artemin levels	0.00184146	0.00254541	27.6652	42.6787	20.0001
rs9496445	T	C	T	C	0.0853	0.000918409	0.1545	0.152012	Bladder cancer	0.0717308	0.989785	GCST90274760	6	143047898	0.0181	2.44e-06	6_143047898_T_C	11768	Artemin levels	0.00188405	0.00190095	22.4091	42.6787	22.2096
rs9684768	C	G	C	G	0.0692	-0.0635891	0.626	0.645791	Bladder cancer	0.0538952	0.238053	GCST90274760	4	156930775	0.014	7.7e-07	4_156930775_C_G	11330	Artemin levels	0.00215212	0.00224227	25.4575	42.6787	24.4318
rs10860902	C	G	C	G	0.0659	0.0846376	0.7403	0.760527	Bladder cancer	0.0602532	0.160111	GCST90274761	12	103075047	0.0149	9.74e-06	12_103075047_C_G	11778	Axin-1 levels	0.00165836	0.00166986	19.6972	42.6787	19.5613
rs11202576	A	G	A	G	-0.0767	-0.0399324	0.7946	0.806153	Bladder cancer	0.0648438	0.53801	GCST90274761	10	89584284	0.0172	8.22e-06	10_89584284_A_G	11345	Axin-1 levels	0.00175003	0.0019203	21.8239	42.6787	19.8854
rs113946880	T	C	T	C	0.1331	-0.0724406	0.0539	0.0591552	Bladder cancer	0.109704	0.509045	GCST90274761	11	134706712	0.0293	5.55e-06	11_134706712_T_C	11792	Axin-1 levels	0.00174722	0.00180681	21.3408	42.6787	20.6358
rs115455827	A	G	A	G	0.1447	-0.0061807	0.9489	0.959856	Bladder cancer	0.1302	0.962138	GCST90274761	5	78787853	0.0305	2.09e-06	5_78787853_A_G	11792	Axin-1 levels	0.00190544	0.00203053	23.9886	42.6787	22.508
rs148317708	A	G	A	G	-0.212	0.203808	0.0295	0.0306125	Bladder cancer	0.1502	0.17481	GCST90274761	18	50513818	0.042	4.47e-07	18_50513818_A_G	10919	Axin-1 levels	0.0023284	0.00257347	28.1671	42.6787	25.4785
rs2470622	A	G	A	G	-0.1229	0.185343	0.9127	0.916147	Bladder cancer	0.0931459	0.0466114	GCST90274761	8	102489704	0.0242	3.8e-07	8_102489704_A_G	11345	Axin-1 levels	0.0022686	0.002407	27.3685	42.6787	25.7913
rs2691530	T	C	T	C	-0.067	-0.0534062	0.5969	0.611386	Bladder cancer	0.0527495	0.311323	GCST90274761	7	77960243	0.0133	4.71e-07	7_77960243_T_C	11793	Axin-1 levels	0.00214764	0.0021602	25.5261	42.6787	25.3774
rs2712427	A	G	A	G	0.0626	-0.0172547	0.4935	0.504167	Bladder cancer	0.0524365	0.742111	GCST90274761	3	128431622	0.0134	2.99e-06	3_128431622_A_G	11345	Axin-1 levels	0.00192033	0.00195905	22.2651	42.6787	21.8242
rs428324	T	C	T	C	0.0692	0.00202594	0.6047	0.597667	Bladder cancer	0.0544814	0.970337	GCST90274761	18	77253338	0.0148	2.93e-06	18_77253338_T_C	10281	Axin-1 levels	0.00212234	0.00228933	23.5861	42.6787	21.8619
rs7171268	T	C	T	C	0.1554	0.0675321	0.9514	0.961395	Bladder cancer	0.13401	0.61431	GCST90274761	15	81221771	0.0329	2.32e-06	15_81221771_T_C	11345	Axin-1 levels	0.00196304	0.00223322	25.3881	42.6787	22.3105
rs72984228	A	G	A	G	-0.1557	-0.0692996	0.9611	0.96097	Bladder cancer	0.131811	0.599063	GCST90274761	11	101331132	0.035	8.64e-06	11_101331132_A_G	11792	Axin-1 levels	0.00167571	0.0018127	21.4105	42.6787	19.7898
rs9962377	T	C	T	C	-0.0843	-0.0845303	0.1481	0.15643	Bladder cancer	0.0709233	0.233318	GCST90274761	18	70105531	0.0186	5.84e-06	18_70105531_T_C	11793	Axin-1 levels	0.00173909	0.0017932	21.1816	42.6787	20.5414
rs11025264	T	C	T	C	0.1739	-0.0790187	0.9748	0.978061	Bladder cancer	0.175262	0.65209	GCST90274762	11	19837758	0.0384	5.94e-06	11_19837758_T_C	14743	beta-nerve growth factor levels	0.00138933	0.00148575	21.934	42.6787	20.5086
rs11778834	T	C	T	C	-0.2284	0.262654	0.0226	0.0103366	Bladder cancer	0.252925	0.299053	GCST90274762	8	62908374	0.0503	5.61e-06	8_62908374_T_C	12841	beta-nerve growth factor levels	0.00160335	0.00230464	29.6576	42.6787	20.6185
rs12188775	T	G	T	G	0.1213	0.355153	0.9435	0.953991	Bladder cancer	0.123083	0.00390831	GCST90274762	5	132971762	0.0247	9.06e-07	5_132971762_T_G	14737	beta-nerve growth factor levels	0.00163406	0.00156871	23.1512	42.6787	24.1172
rs12259196	A	G	A	G	-0.075	-0.0119405	0.1928	0.20235	Bladder cancer	0.0639317	0.851842	GCST90274762	10	89839430	0.0148	4.03e-07	10_89839430_A_G	13244	beta-nerve growth factor levels	0.00193555	0.00175082	23.225	42.6787	25.6802
rs12533747	A	G	A	G	0.1389	-0.103519	0.0802	0.0363557	Bladder cancer	0.139867	0.459227	GCST90274762	7	30944899	0.0276	4.84e-07	7_30944899_A_G	14295	beta-nerve growth factor levels	0.00176886	0.00284644	40.8003	42.6787	25.3272
rs12539643	C	G	C	G	0.1867	-0.240686	0.966	0.970953	Bladder cancer	0.153645	0.117229	GCST90274762	7	151019021	0.0408	4.74e-06	7_151019021_C_G	11344	beta-nerve growth factor levels	0.0018428	0.00228968	26.0291	42.6787	20.9396
rs140072192	A	G	A	G	0.2773	0.124837	0.0196	0.0135494	Bladder cancer	0.22297	0.575561	GCST90274762	16	3327943	0.0602	4.1e-06	16_3327943_A_G	11925	beta-nerve growth factor levels	0.00177643	0.00295522	35.3395	42.6787	21.2181
rs140882208	T	C	T	C	-0.1722	-0.0723227	0.0258	0.0229459	Bladder cancer	0.173459	0.676719	GCST90274762	17	47365286	0.0388	9.07e-06	17_47365286_T_C	14731	beta-nerve growth factor levels	0.00133552	0.00149061	21.988	42.6787	19.6971
rs148834134	T	C	T	C	0.2541	0.212406	0.0235	0.00961369	Bladder cancer	0.261488	0.416621	GCST90274762	21	43942626	0.0556	4.87e-06	21_43942626_T_C	13421	beta-nerve growth factor levels	0.00155405	0.00296333	39.8831	42.6787	20.8862
rs17647697	A	C	A	C	-0.1617	-0.0180776	0.9727	0.978352	Bladder cancer	0.178297	0.919241	GCST90274762	7	130302087	0.0352	4.35e-06	7_130302087_A_C	14741	beta-nerve growth factor levels	0.0014297	0.00138865	20.4957	42.6787	21.1025
rs17689534	A	G	A	G	0.2208	-0.0072908	0.0229	0.013376	Bladder cancer	0.225102	0.974162	GCST90274762	4	166807640	0.0462	1.76e-06	4_166807640_A_G	13421	beta-nerve growth factor levels	0.00169924	0.00218174	29.3408	42.6787	22.841
rs183185212	A	C	A	C	-0.2977	0.0338643	0.9883	0.990317	Bladder cancer	0.264567	0.89815	GCST90274762	11	9434918	0.0657	5.86e-06	11_9434918_A_C	13808	beta-nerve growth factor levels	0.00148496	0.00204957	28.3544	42.6787	20.5318
rs1878359	A	G	A	G	0.0626	0.0656886	0.719	0.737034	Bladder cancer	0.0592005	0.267173	GCST90274762	8	122948812	0.0126	6.76e-07	8_122948812_A_G	14740	beta-nerve growth factor levels	0.00167202	0.00158348	23.3744	42.6787	24.6835
rs2237172	A	G	A	G	0.0619	-0.118377	0.7375	0.74663	Bladder cancer	0.0605586	0.050612	GCST90274762	6	16601587	0.0136	5.33e-06	6_16601587_A_G	14295	beta-nerve growth factor levels	0.00144728	0.00148355	21.2359	42.6787	20.7159
rs3128517	T	C	T	C	-0.0775	0.0352218	0.4965	0.496236	Bladder cancer	0.0527238	0.504105	GCST90274762	9	90362040	0.0118	5.11e-11	9_90362040_T_C	14295	beta-nerve growth factor levels	0.0030089	0.00300298	43.0508	42.6787	43.136
rs34559191	T	C	T	C	0.0607	0.0289265	0.3088	0.302506	Bladder cancer	0.0566231	0.609449	GCST90274762	19	16434937	0.0124	9.82e-07	19_16434937_T_C	13675	beta-nerve growth factor levels	0.00174948	0.00157285	21.5395	42.6787	23.9626
rs397081	T	C	T	C	0.1203	-0.119909	0.9514	0.958432	Bladder cancer	0.130049	0.356516	GCST90274762	6	32192617	0.0262	4.4e-06	6_32192617_T_C	14743	beta-nerve growth factor levels	0.00142817	0.00133832	19.7546	42.6787	21.0828
rs4017	T	C	T	C	-0.1187	0.14488	0.9491	0.949418	Bladder cancer	0.116814	0.214878	GCST90274762	4	164064099	0.0258	4.21e-06	4_164064099_T_C	14742	beta-nerve growth factor levels	0.00143397	0.00136132	20.0933	42.6787	21.1671
rs4087847	T	G	T	G	-0.1546	0.498391	0.0301	0.0172626	Bladder cancer	0.19783	0.0117594	GCST90274762	18	2455418	0.0343	6.57e-06	18_2455418_T_G	14743	beta-nerve growth factor levels	0.00137628	0.00139554	20.6004	42.6787	20.3157
rs4980184	T	C	T	C	0.2352	0.0198218	0.9836	0.990427	Bladder cancer	0.265673	0.940525	GCST90274762	10	125058869	0.0521	6.35e-06	10_125058869_T_C	14295	beta-nerve growth factor levels	0.00142383	0.00178471	25.5544	42.6787	20.3798
rs62092633	T	C	T	C	-0.1249	-0.113052	0.1005	0.0542638	Bladder cancer	0.114506	0.323493	GCST90274762	18	55441626	0.0259	1.42e-06	18_55441626_T_C	11344	beta-nerve growth factor levels	0.00204619	0.00282047	32.0803	42.6787	23.2555
rs62494116	T	C	T	C	0.0578	0.00410791	0.6636	0.668998	Bladder cancer	0.0549397	0.940397	GCST90274762	8	13332042	0.0117	7.81e-07	8_13332042_T_C	14729	beta-nerve growth factor levels	0.00165444	0.00149158	21.9994	42.6787	24.4053
rs6328	A	C	A	C	-0.0797	0.0380922	0.3498	0.332063	Bladder cancer	0.0545771	0.485207	GCST90274762	1	115829943	0.0122	6.46e-11	1_115829943_A_C	13224	beta-nerve growth factor levels	0.00321736	0.00288944	38.3149	42.6787	42.6773
rs7149605	A	G	A	G	0.0862	0.14498	0.0949	0.0899142	Bladder cancer	0.0905914	0.109516	GCST90274762	14	94854041	0.0195	9.85e-06	14_94854041_A_G	14731	beta-nerve growth factor levels	0.00132494	0.00127646	18.825	42.6787	19.5409
rs72673086	A	G	A	G	0.0584	0.00335027	0.3152	0.289451	Bladder cancer	0.0566325	0.952826	GCST90274762	4	96824143	0.0126	3.57e-06	4_96824143_A_G	12858	beta-nerve growth factor levels	0.00166822	0.00147233	18.9562	42.6787	21.4825
rs73782207	A	G	A	G	0.0925	0.142404	0.0825	0.0717199	Bladder cancer	0.100246	0.155449	GCST90274762	6	150452471	0.0205	6.42e-06	6_150452471_A_G	14734	beta-nerve growth factor levels	0.00138011	0.00129531	19.1072	42.6787	20.3599
rs74639669	A	T	A	T	-0.1748	0.138687	0.0281	0.0200898	Bladder cancer	0.182296	0.446789	GCST90274762	18	5679360	0.0386	5.94e-06	18_5679360_A_T	14733	beta-nerve growth factor levels	0.00139018	0.00166894	24.6263	42.6787	20.5073
rs77493302	T	C	T	C	0.0853	-0.0125117	0.8904	0.901641	Bladder cancer	0.0870078	0.885658	GCST90274762	6	838092	0.0185	4.01e-06	6_838092_T_C	14743	beta-nerve growth factor levels	0.00144013	0.00142012	20.9637	42.6787	21.2596
rs78167655	T	C	T	C	-0.1646	-0.0667246	0.0262	0.0312908	Bladder cancer	0.148281	0.65272	GCST90274762	4	119266088	0.0365	6.5e-06	4_119266088_T_C	14743	beta-nerve growth factor levels	0.00137768	0.00138249	20.4074	42.6787	20.3364
rs9479501	T	G	T	G	0.0629	-0.0672314	0.2135	0.230658	Bladder cancer	0.0612342	0.272231	GCST90274762	6	153400418	0.0137	4.41e-06	6_153400418_T_G	14729	beta-nerve growth factor levels	0.0014293	0.0013287	19.5938	42.6787	21.0795
rs9599159	T	C	T	C	-0.175	0.154239	0.9756	0.97803	Bladder cancer	0.176153	0.381249	GCST90274762	13	67428046	0.0387	6.13e-06	13_67428046_T_C	14730	beta-nerve growth factor levels	0.00138646	0.00145803	21.5053	42.6787	20.4482
rs10024203	A	C	A	C	0.0922	0.12997	0.094	0.100305	Bladder cancer	0.0856955	0.129355	GCST90274763	4	5786594	0.0203	5.58e-06	4_5786594_A_C	14735	Caspase 8 levels	0.00139821	0.00144793	21.3633	42.6787	20.6286
rs1032417	C	G	C	G	-0.0858	-0.0320825	0.1545	0.166865	Bladder cancer	0.0690268	0.642087	GCST90274763	12	62645486	0.0165	1.99e-07	12_62645486_C_G	14296	Caspase 8 levels	0.00188813	0.0019233	27.5446	42.6787	27.04
rs111764025	C	G	C	G	0.1095	0.00455394	0.9304	0.933152	Bladder cancer	0.104087	0.965103	GCST90274763	8	5557775	0.0238	4.21e-06	8_5557775_C_G	14731	Caspase 8 levels	0.00143508	0.00155288	22.9079	42.6787	21.1677
rs11216018	A	G	A	G	-0.0539	-0.0549844	0.3708	0.355064	Bladder cancer	0.0543426	0.311629	GCST90274763	11	98455719	0.0121	8.41e-06	11_98455719_A_G	14296	Caspase 8 levels	0.00138628	0.00135561	19.4034	42.6787	19.843
rs11695193	A	T	A	T	-0.0806	-0.0933822	0.1582	0.148215	Bladder cancer	0.0724235	0.197262	GCST90274763	2	231090015	0.0162	6.51e-07	2_231090015_A_T	14743	Caspase 8 levels	0.00167643	0.00173028	25.5502	42.6787	24.7537
rs11709039	T	C	T	C	0.0781	0.0505157	0.856	0.861411	Bladder cancer	0.0747381	0.499102	GCST90274763	3	152332673	0.0168	3.34e-06	3_152332673_T_C	14743	Caspase 8 levels	0.00146393	0.00150373	22.1998	42.6787	21.6114
rs12073499	A	C	A	C	-0.0812	-0.0498353	0.8466	0.871304	Bladder cancer	0.0769648	0.517303	GCST90274763	1	157270515	0.0167	1.16e-06	1_157270515_A_C	14295	Caspase 8 levels	0.00165135	0.00171256	24.5196	42.6787	23.6417
rs13188908	T	C	T	C	0.0668	-0.11903	0.1902	0.189776	Bladder cancer	0.0656051	0.0696262	GCST90274763	5	179923576	0.015	8.45e-06	5_179923576_T_C	14736	Caspase 8 levels	0.00134421	0.00137458	20.281	42.6787	19.8322
rs137887001	C	G	C	G	0.2318	-0.0165438	0.9827	0.982308	Bladder cancer	0.195776	0.932656	GCST90274763	20	44566861	0.0486	1.85e-06	20_44566861_C_G	14296	Caspase 8 levels	0.00158895	0.00182694	26.1621	42.6787	22.7486
rs1467702	A	G	A	G	-0.0962	0.307119	0.0863	0.0618197	Bladder cancer	0.107344	0.00422219	GCST90274763	10	129961901	0.0215	7.66e-06	10_129961901_A_G	14743	Caspase 8 levels	0.0013563	0.00145947	21.5455	42.6787	20.0204
rs2411067	A	G	A	G	-0.0706	0.0399015	0.685	0.69047	Bladder cancer	0.0568513	0.482768	GCST90274763	17	75033876	0.0157	6.9e-06	17_75033876_A_G	11345	Caspase 8 levels	0.00177954	0.002151	24.4514	42.6787	20.2213
rs34154371	T	C	T	C	-0.2016	0.0967658	0.9714	0.981449	Bladder cancer	0.191794	0.613888	GCST90274763	1	2338015	0.0422	1.78e-06	1_2338015_T_C	13232	Caspase 8 levels	0.00172206	0.00225827	29.9445	42.6787	22.8221
rs56097553	A	G	A	G	0.1384	-0.0751413	0.0405	0.0428029	Bladder cancer	0.126494	0.552492	GCST90274763	12	82467039	0.0312	9.17e-06	12_82467039_A_G	14744	Caspase 8 levels	0.00133299	0.00148868	21.9789	42.6787	19.6772
rs56328050	C	G	C	G	-0.1987	0.0904026	0.8696	0.866306	Bladder cancer	0.0752002	0.229302	GCST90274763	2	202164805	0.0173	1.56e-30	2_202164805_C_G	14743	Caspase 8 levels	0.00886967	0.00895412	133.185	42.6787	131.918
rs7146962	T	C	T	C	-0.0613	0.032235	0.7483	0.747965	Bladder cancer	0.059013	0.584904	GCST90274763	14	54145317	0.0135	5.61e-06	14_54145317_T_C	14295	Caspase 8 levels	0.00144047	0.0014155	20.2604	42.6787	20.6183
rs7287303	T	C	T	C	0.0985	0.00468477	0.1249	0.0664204	Bladder cancer	0.107774	0.965328	GCST90274763	22	48714112	0.0222	9.12e-06	22_48714112_T_C	11791	Caspase 8 levels	0.00166711	0.00212091	25.0566	42.6787	19.6864
rs73306603	T	C	T	C	0.2044	0.236114	0.978	0.979034	Bladder cancer	0.180999	0.192062	GCST90274763	10	84027526	0.0412	7.01e-07	10_84027526_T_C	14741	Caspase 8 levels	0.00166715	0.00179785	26.5462	42.6787	24.6132
rs7418913	A	G	A	G	-0.0614	0.0365791	0.2714	0.275886	Bladder cancer	0.057463	0.524406	GCST90274763	1	203643268	0.0138	8.62e-06	1_203643268_A_G	14296	Caspase 8 levels	0.00138301	0.00149096	21.3436	42.6787	19.7961
rs78449258	A	G	A	G	-0.2001	0.0171917	0.9804	0.976331	Bladder cancer	0.167294	0.918151	GCST90274763	9	22742536	0.0428	2.94e-06	9_22742536_A_G	14744	Caspase 8 levels	0.00148049	0.00153881	22.72	42.6787	21.8578
rs10911109	A	G	A	G	-0.0767	-0.0122658	0.1696	0.170161	Bladder cancer	0.0684722	0.857832	GCST90274764	1	172117232	0.0172	8.22e-06	1_172117232_A_G	11774	Eotaxin levels	0.00168636	0.00165704	19.5391	42.6787	19.8854
rs114744647	T	C	T	C	0.2107	-0.439657	0.9774	0.977547	Bladder cancer	0.173159	0.0111159	GCST90274764	16	24006879	0.0451	2.99e-06	16_24006879_T_C	14730	Eotaxin levels	0.00147975	0.00196128	28.9425	42.6787	21.8261
rs12075	A	G	A	G	0.0749	-0.0188169	0.5547	0.579642	Bladder cancer	0.0520685	0.71781	GCST90274764	1	159175354	0.0114	5.03e-11	1_159175354_A_G	14731	Eotaxin levels	0.0029222	0.00277143	40.9339	42.6787	43.1672
rs12453306	C	G	C	G	-0.1089	0.0748693	0.9022	0.920897	Bladder cancer	0.0963754	0.437247	GCST90274764	17	77253324	0.0244	8.08e-06	17_77253324_C_G	11335	Eotaxin levels	0.00175456	0.0020928	23.7674	42.6787	19.9194
rs139476527	T	G	T	G	0.2826	0.287148	0.0125	0.011987	Bladder cancer	0.238553	0.228703	GCST90274764	20	49033630	0.0606	3.11e-06	20_49033630_T_G	12933	Eotaxin levels	0.00167895	0.00197161	25.5453	42.6787	21.747
rs139597204	A	C	A	C	-0.3374	0.129001	0.0128	0.00787504	Bladder cancer	0.285576	0.65147	GCST90274764	4	104507060	0.0714	2.3e-06	4_104507060_A_C	12303	Eotaxin levels	0.00181203	0.00287697	35.4917	42.6787	22.3303
rs140965534	T	C	T	C	-0.2283	0.206992	0.0172	0.0105378	Bladder cancer	0.253386	0.413983	GCST90274764	8	49300287	0.0514	8.93e-06	8_49300287_T_C	14238	Eotaxin levels	0.00138387	0.00176212	25.1298	42.6787	19.7281
rs148554043	T	C	T	C	0.4043	-0.575985	0.0083	0.00459776	Bladder cancer	0.378468	0.128038	GCST90274764	3	175964549	0.0898	6.72e-06	3_175964549_T_C	11726	Eotaxin levels	0.00172595	0.00269089	31.6331	42.6787	20.27
rs151240414	A	G	A	G	0.2299	-0.218568	0.0222	0.0159292	Bladder cancer	0.205469	0.287442	GCST90274764	5	130672061	0.0508	6.02e-06	5_130672061_A_G	11335	Eotaxin levels	0.00180394	0.00229462	26.0647	42.6787	20.481
rs170520	A	G	A	G	0.0554	-0.119219	0.3264	0.330495	Bladder cancer	0.0549535	0.0300488	GCST90274764	18	38337850	0.0125	9.34e-06	18_38337850_A_G	14285	Eotaxin levels	0.00137336	0.00134959	19.3022	42.6787	19.6426
rs2112920	C	G	C	G	0.0817	0.189032	0.8362	0.835495	Bladder cancer	0.0695162	0.00654288	GCST90274764	19	37955248	0.016	3.29e-07	19_37955248_C_G	14286	Eotaxin levels	0.00182206	0.00182851	26.1663	42.6787	26.0738
rs2201150	T	C	T	C	0.0785	0.0393134	0.3561	0.363044	Bladder cancer	0.053395	0.461563	GCST90274764	3	46258902	0.0123	1.75e-10	3_46258902_T_C	14286	Eotaxin levels	0.00284343	0.00282592	40.4798	42.6787	40.7314
rs2228467	T	C	T	C	-0.3316	-0.0924073	0.9289	0.938641	Bladder cancer	0.107081	0.388158	GCST90274764	3	42906116	0.0225	3.69e-49	3_42906116_T_C	14733	Eotaxin levels	0.0145303	0.0145244	217.112	42.6787	217.202
rs34536806	T	G	T	G	0.1017	0.00527749	0.9023	0.920644	Bladder cancer	0.0970555	0.956636	GCST90274764	11	95274487	0.0208	1.01e-06	11_95274487_T_G	14286	Eotaxin levels	0.00167086	0.00182355	26.0952	42.6787	23.9065
rs35543857	A	G	A	G	-0.1138	0.0477176	0.9282	0.941996	Bladder cancer	0.109401	0.662711	GCST90274764	12	105757994	0.0244	3.1e-06	12_105757994_A_G	14286	Eotaxin levels	0.00152053	0.00172616	24.6991	42.6787	21.7523
rs6894241	A	C	A	C	-0.0656	-0.0403259	0.2333	0.227101	Bladder cancer	0.0618657	0.514511	GCST90274764	5	118058126	0.0137	1.68e-06	5_118058126_A_C	14715	Eotaxin levels	0.00155593	0.00153949	22.6855	42.6787	22.928
rs73171545	A	G	A	G	-0.0861	-0.0518694	0.1199	0.104896	Bladder cancer	0.0837202	0.535549	GCST90274764	22	45003109	0.0187	4.14e-06	22_45003109_A_G	14286	Eotaxin levels	0.00148193	0.00156454	22.383	42.6787	21.1994
rs73209015	A	T	A	T	-0.0913	-0.018595	0.1104	0.0917671	Bladder cancer	0.0896697	0.835719	GCST90274764	8	11700967	0.0189	1.36e-06	8_11700967_A_T	14728	Eotaxin levels	0.00158214	0.00163733	24.1508	42.6787	23.3355
rs74796877	A	G	A	G	0.2955	-0.186229	0.0105	0.00642273	Bladder cancer	0.320529	0.561236	GCST90274764	3	1768047	0.0664	8.57e-06	3_1768047_A_G	13120	Eotaxin levels	0.00150749	0.00181447	23.8455	42.6787	19.8052
rs757973	A	G	A	G	0.2002	0.025079	0.09	0.0919102	Bladder cancer	0.0886811	0.777331	GCST90274764	7	75495667	0.0205	1.58e-22	7_75495667_A_G	14713	Eotaxin levels	0.00644127	0.00656511	97.2176	42.6787	95.3719
rs79432525	T	G	T	G	0.1929	-0.0123509	0.9754	0.978169	Bladder cancer	0.174863	0.943691	GCST90274764	10	128183195	0.0422	4.85e-06	10_128183195_T_G	14247	Eotaxin levels	0.00146467	0.00178572	25.483	42.6787	20.8949
rs79684468	T	C	T	C	0.1502	0.0901812	0.0433	0.0353634	Bladder cancer	0.139609	0.51831	GCST90274764	3	43179320	0.0303	7.16e-07	3_43179320_T_C	14286	Eotaxin levels	0.00171735	0.0018691	26.7483	42.6787	24.5728
rs79722574	T	C	T	C	-0.1215	0.030857	0.167	0.158548	Bladder cancer	0.0711716	0.66461	GCST90274764	17	32619052	0.0156	6.78e-15	17_32619052_T_C	14720	Eotaxin levels	0.00410458	0.00410718	60.6988	42.6787	60.6601
rs9303380	A	G	A	G	0.1213	-0.181002	0.0494	0.0460673	Bladder cancer	0.122381	0.139141	GCST90274764	17	54117492	0.0272	8.21e-06	17_54117492_A_G	14286	Eotaxin levels	0.00139037	0.0013819	19.7664	42.6787	19.8877
rs9940390	T	C	T	C	-0.0818	0.0202835	0.7358	0.730767	Bladder cancer	0.058102	0.727013	GCST90274764	16	80051931	0.0133	7.73e-10	16_80051931_T_C	14286	Eotaxin levels	0.00264122	0.00260153	37.2572	42.6787	37.8271
rs9976282	A	G	A	G	-0.1678	0.1641	0.0333	0.0283572	Bladder cancer	0.154976	0.289659	GCST90274764	21	39593226	0.0345	1.15e-06	21_39593226_A_G	14722	Eotaxin levels	0.0016045	0.0018128	26.7329	42.6787	23.6562
rs10242459	A	G	A	G	0.0729	0.0464482	0.8219	0.826437	Bladder cancer	0.0680667	0.494991	GCST90274765	7	3911280	0.0154	2.2e-06	7_3911280_A_G	14729	C-C motif chemokine 19 levels	0.00151928	0.00155585	22.9487	42.6787	22.4085
rs10496135	C	G	C	G	0.1856	-0.329512	0.9689	0.978601	Bladder cancer	0.177369	0.0631999	GCST90274765	2	66640363	0.0384	1.34e-06	2_66640363_C_G	14288	C-C motif chemokine 19 levels	0.00163258	0.00207599	29.7193	42.6787	23.3611
rs111317412	A	C	A	C	-0.1236	-0.0542373	0.9429	0.94164	Bladder cancer	0.110383	0.623174	GCST90274765	14	48619204	0.0274	6.45e-06	14_48619204_A_C	14288	C-C motif chemokine 19 levels	0.00142235	0.00164501	23.5393	42.6787	20.3487
rs11174279	A	T	A	T	-0.0694	0.13125	0.1741	0.166795	Bladder cancer	0.0691416	0.0576596	GCST90274765	12	62401393	0.0156	8.64e-06	12_62401393_A_T	14730	C-C motif chemokine 19 levels	0.00134197	0.00138508	20.4278	42.6787	19.7911
rs113539352	C	G	C	G	0.4485	-0.439756	0.992	0.995001	Bladder cancer	0.36279	0.225455	GCST90274765	3	58516854	0.0922	1.15e-06	3_58516854_C_G	11439	C-C motif chemokine 19 levels	0.00206468	0.00319269	36.6317	42.6787	23.6626
rs115109204	T	C	T	C	0.3784	0.297293	0.0116	0.00724464	Bladder cancer	0.304896	0.329529	GCST90274765	5	23807519	0.0842	6.99e-06	5_23807519_T_C	10795	C-C motif chemokine 19 levels	0.00186777	0.00328339	35.5544	42.6787	20.1966
rs11574915	A	C	A	C	-0.1464	0.0669051	0.8639	0.878682	Bladder cancer	0.0791452	0.397918	GCST90274765	9	34710084	0.017	7.19e-18	9_34710084_A_C	14733	C-C motif chemokine 19 levels	0.00500923	0.00504004	74.6209	42.6787	74.1625
rs11877886	A	G	A	G	-0.1065	0.101784	0.0669	0.0689469	Bladder cancer	0.101699	0.316908	GCST90274765	18	69226577	0.0239	8.35e-06	18_69226577_A_G	14722	C-C motif chemokine 19 levels	0.00134713	0.00141607	20.8741	42.6787	19.8565
rs11961362	T	C	T	C	-0.1185	0.0252256	0.0713	0.0230751	Bladder cancer	0.179662	0.888339	GCST90274765	6	81004579	0.0264	7.17e-06	6_81004579_T_C	12851	C-C motif chemokine 19 levels	0.00156559	0.00185965	23.9392	42.6787	20.1479
rs12521515	A	T	A	T	0.086	0.0876905	0.861	0.860905	Bladder cancer	0.0741954	0.237251	GCST90274765	5	123121314	0.0192	7.49e-06	5_123121314_A_T	11780	C-C motif chemokine 19 levels	0.00170053	0.00177029	20.8875	42.6787	20.0629
rs13212719	A	G	A	G	0.0671	0.00943254	0.8005	0.828266	Bladder cancer	0.0684193	0.890348	GCST90274765	6	133835436	0.015	7.7e-06	6_133835436_A_G	14288	C-C motif chemokine 19 levels	0.00139876	0.00143807	20.5738	42.6787	20.0107
rs1328133	A	T	A	T	0.3112	-0.158457	0.01	0.0069723	Bladder cancer	0.308681	0.607717	GCST90274765	6	9710127	0.0695	7.55e-06	6_9710127_A_T	13422	C-C motif chemokine 19 levels	0.00149179	0.00191754	25.7828	42.6787	20.0498
rs138108512	A	G	A	G	-0.2939	0.00339059	0.0119	0.00991892	Bladder cancer	0.259958	0.989594	GCST90274765	14	76855291	0.0616	1.83e-06	14_76855291_A_G	13422	C-C motif chemokine 19 levels	0.00169336	0.00203131	27.3157	42.6787	22.7634
rs138618048	A	G	A	G	-0.2066	-0.13719	0.0209	0.0209988	Bladder cancer	0.177918	0.440657	GCST90274765	14	100142541	0.046	7.08e-06	14_100142541_A_G	14247	C-C motif chemokine 19 levels	0.00141406	0.00174688	24.9279	42.6787	20.1718
rs1415763	C	G	C	G	0.0757	0.0371325	0.1687	0.152731	Bladder cancer	0.0718186	0.605134	GCST90274765	6	125027776	0.0157	1.42e-06	6_125027776_C_G	14731	C-C motif chemokine 19 levels	0.00157592	0.00160729	23.7119	42.6787	23.2484
rs147708384	T	C	T	C	-0.2707	-0.215046	0.0151	0.00921461	Bladder cancer	0.269029	0.424094	GCST90274765	17	14918425	0.0574	2.4e-06	17_14918425_T_C	13801	C-C motif chemokine 19 levels	0.00160918	0.00217959	30.1419	42.6787	22.2409
rs192686691	C	G	C	G	0.2648	0.320164	0.0195	0.0116582	Bladder cancer	0.241102	0.184204	GCST90274765	3	12700866	0.0589	6.93e-06	3_12700866_C_G	10795	C-C motif chemokine 19 levels	0.00186918	0.00268132	29.0173	42.6787	20.2118
rs2070746	T	G	T	G	-0.0575	0.0074621	0.307	0.284398	Bladder cancer	0.0570307	0.895899	GCST90274765	19	52249702	0.0128	7.05e-06	19_52249702_T_G	14288	C-C motif chemokine 19 levels	0.00141056	0.00140682	20.1261	42.6787	20.1797
rs34791102	A	G	A	G	0.1238	-0.068282	0.0534	0.05813	Bladder cancer	0.109671	0.533544	GCST90274765	9	35612978	0.0265	2.99e-06	9_35612978_A_G	14735	C-C motif chemokine 19 levels	0.00147916	0.00154945	22.8636	42.6787	21.8248
rs374784992	A	G	A	G	0.1335	0.145822	0.9401	0.94677	Bladder cancer	0.116764	0.211718	GCST90274765	4	119585039	0.0298	7.47e-06	4_119585039_A_G	11760	C-C motif chemokine 19 levels	0.00170395	0.00200721	23.6483	42.6787	20.0692
rs3792790	A	C	A	C	0.0551	-0.024437	0.4736	0.45631	Bladder cancer	0.0521576	0.639411	GCST90274765	5	150442171	0.012	4.4e-06	5_150442171_A_C	14288	C-C motif chemokine 19 levels	0.00147363	0.00151377	21.6585	42.6787	21.0834
rs4356912	T	C	T	C	-0.0592	0.00269389	0.6909	0.688482	Bladder cancer	0.0558259	0.961513	GCST90274765	4	7444846	0.0133	8.54e-06	4_7444846_T_C	14288	C-C motif chemokine 19 levels	0.00138493	0.00149688	21.4165	42.6787	19.8125
rs454265	A	G	A	G	-0.0561	0.00746713	0.6505	0.65274	Bladder cancer	0.0541781	0.890378	GCST90274765	8	81339142	0.0124	6.06e-06	8_81339142_A_G	14728	C-C motif chemokine 19 levels	0.00138802	0.00143103	21.1036	42.6787	20.4683
rs4554017	T	C	T	C	0.0596	0.0664142	0.3904	0.388758	Bladder cancer	0.0526474	0.207132	GCST90274765	4	145124024	0.0122	1.03e-06	4_145124024_T_C	14288	C-C motif chemokine 19 levels	0.00166777	0.00169074	24.1948	42.6787	23.8656
rs4907572	A	G	A	G	-0.0671	0.0595806	0.2653	0.267692	Bladder cancer	0.0582524	0.306402	GCST90274765	13	113647321	0.0137	9.69e-07	13_113647321_A_G	14722	C-C motif chemokine 19 levels	0.001627	0.00175518	25.8817	42.6787	23.9885
rs62292952	T	G	T	G	0.2346	0.151219	0.8822	0.887519	Bladder cancer	0.0811143	0.0622833	GCST90274765	3	132200719	0.0185	7.53e-37	3_132200719_T_G	14728	C-C motif chemokine 19 levels	0.0108022	0.0114393	170.404	42.6787	160.81
rs6486995	A	T	A	T	-0.0697	0.020858	0.2452	0.232608	Bladder cancer	0.0612021	0.73325	GCST90274765	12	19813981	0.0135	2.43e-07	12_19813981_A_T	14735	C-C motif chemokine 19 levels	0.00180602	0.00179824	26.5412	42.6787	26.6562
rs6535499	T	C	T	C	-0.1216	-0.0936942	0.0583	0.0576879	Bladder cancer	0.110051	0.394562	GCST90274765	4	76428761	0.0272	7.8e-06	4_76428761_T_C	14288	C-C motif chemokine 19 levels	0.00139705	0.0016236	23.2324	42.6787	19.9862
rs6870560	T	C	T	C	0.0863	-0.128529	0.8559	0.858878	Bladder cancer	0.0741581	0.0830644	GCST90274765	5	174187919	0.0169	3.28e-07	5_174187919_T_C	14732	C-C motif chemokine 19 levels	0.00176717	0.00183712	27.1106	42.6787	26.0764
rs7185085	T	C	T	C	-0.3558	0.13456	0.9931	0.993958	Bladder cancer	0.331422	0.684737	GCST90274765	16	82146285	0.0803	9.38e-06	16_82146285_T_C	12291	C-C motif chemokine 19 levels	0.00159504	0.00173494	21.3577	42.6787	19.6327
rs73257451	T	C	T	C	-0.3645	0.00532596	0.989	0.995429	Bladder cancer	0.379028	0.988789	GCST90274765	8	61418130	0.0756	1.43e-06	8_61418130_T_C	11337	C-C motif chemokine 19 levels	0.00204663	0.00289077	32.8619	42.6787	23.2462
rs74764632	A	T	A	T	0.1349	-0.0382666	0.9557	0.954747	Bladder cancer	0.123928	0.757488	GCST90274765	16	57300587	0.0294	4.47e-06	16_57300587_A_T	14734	C-C motif chemokine 19 levels	0.00142708	0.00154092	22.7358	42.6787	21.0537
rs7595241	C	G	C	G	0.0615	-0.0758577	0.6941	0.706332	Bladder cancer	0.057074	0.183811	GCST90274765	2	7425475	0.013	2.24e-06	2_7425475_C_G	14288	C-C motif chemokine 19 levels	0.00156413	0.00160613	22.9821	42.6787	22.3802
rs76295077	T	C	T	C	0.0928	-0.00816037	0.8962	0.885947	Bladder cancer	0.080806	0.919561	GCST90274765	13	23257952	0.0208	8.14e-06	13_23257952_T_C	14288	C-C motif chemokine 19 levels	0.00139141	0.00160224	22.9264	42.6787	19.9053
rs79086127	T	C	T	C	-0.2096	-0.259574	0.0195	0.017471	Bladder cancer	0.195008	0.183159	GCST90274765	4	123839263	0.045	3.2e-06	4_123839263_T_C	14247	C-C motif chemokine 19 levels	0.00152067	0.00167994	23.9711	42.6787	21.6949
rs9469127	C	G	C	G	-0.4884	-0.0621527	0.9365	0.975223	Bladder cancer	0.167177	0.710059	GCST90274765	6	32444093	0.0277	1.41e-69	6_32444093_C_G	14735	C-C motif chemokine 19 levels	0.0206648	0.0283702	430.183	42.6787	310.879
rs10207134	T	C	T	C	-0.0996	-0.0613226	0.326	0.334932	Bladder cancer	0.0544677	0.260228	GCST90274766	2	228661828	0.0128	7.18e-15	2_228661828_T_C	14287	C-C motif chemokine 20 levels	0.00422067	0.00435939	62.5466	42.6787	60.5479
rs1027232	A	C	A	C	0.1072	-0.118749	0.0762	0.0479802	Bladder cancer	0.120847	0.325788	GCST90274766	15	40077948	0.0238	6.66e-06	15_40077948_A_C	14730	C-C motif chemokine 20 levels	0.00137561	0.0016179	23.8671	42.6787	20.2878
rs10837780	T	C	T	C	0.1191	0.122841	0.9413	0.9427	Bladder cancer	0.111161	0.269129	GCST90274766	11	42142787	0.026	4.63e-06	11_42142787_T_C	14288	C-C motif chemokine 20 levels	0.00146666	0.00156754	22.4291	42.6787	20.9834
rs111674022	T	C	T	C	-0.0953	0.0719599	0.0967	0.0762125	Bladder cancer	0.0978184	0.461945	GCST90274766	1	238606022	0.0208	4.61e-06	1_238606022_T_C	14288	C-C motif chemokine 20 levels	0.00146727	0.00158662	22.7025	42.6787	20.9923
rs11242693	T	C	T	C	0.0637	-0.0658607	0.3674	0.35388	Bladder cancer	0.0559474	0.239119	GCST90274766	6	1448190	0.0135	2.38e-06	6_1448190_T_C	12404	C-C motif chemokine 20 levels	0.00179201	0.00188615	23.4363	42.6787	22.2644
rs1129474	T	C	T	C	0.0573	-0.015944	0.5396	0.527691	Bladder cancer	0.0514331	0.756565	GCST90274766	8	22584718	0.012	1.8e-06	8_22584718_T_C	14288	C-C motif chemokine 20 levels	0.00159347	0.00163135	23.3435	42.6787	22.8006
rs11582772	T	C	T	C	0.2585	-0.00800396	0.9859	0.988844	Bladder cancer	0.245795	0.974023	GCST90274766	1	32260562	0.0548	2.39e-06	1_32260562_T_C	14243	C-C motif chemokine 20 levels	0.00156006	0.00185782	26.5064	42.6787	22.2515
rs117753190	C	G	C	G	-0.185	-0.0822858	0.9688	0.965491	Bladder cancer	0.140439	0.557929	GCST90274766	17	67136325	0.0359	2.56e-07	17_67136325_C_G	14243	C-C motif chemokine 20 levels	0.00186125	0.00206901	29.5258	42.6787	26.5555
rs117900576	C	G	C	G	-0.2256	-0.151474	0.9694	0.965393	Bladder cancer	0.139739	0.278372	GCST90274766	17	72761195	0.0429	1.45e-07	17_72761195_C_G	13224	C-C motif chemokine 20 levels	0.00208718	0.00301948	40.0445	42.6787	27.6544
rs118164045	T	C	T	C	0.1297	-0.126365	0.9526	0.949513	Bladder cancer	0.117683	0.282926	GCST90274766	14	92792639	0.0289	7.19e-06	14_92792639_T_C	14288	C-C motif chemokine 20 levels	0.00140787	0.00151914	21.7355	42.6787	20.1412
rs13049624	A	G	A	G	-0.1315	0.0172418	0.9476	0.946741	Bladder cancer	0.114782	0.880596	GCST90274766	21	44005002	0.0276	1.89e-06	21_44005002_A_G	14288	C-C motif chemokine 20 levels	0.00158647	0.00171727	24.5751	42.6787	22.7004
rs13185268	T	C	T	C	0.1091	0.151579	0.9296	0.940836	Bladder cancer	0.108829	0.163676	GCST90274766	5	133019542	0.0239	5e-06	5_133019542_T_C	14724	C-C motif chemokine 20 levels	0.00141342	0.00155793	22.9717	42.6787	20.8379
rs151092565	T	C	T	C	-0.1512	0.231852	0.0376	0.0299988	Bladder cancer	0.151613	0.126207	GCST90274766	14	94625543	0.0328	4.03e-06	14_94625543_T_C	14728	C-C motif chemokine 20 levels	0.00144094	0.00165454	24.4051	42.6787	21.2499
rs2796032	T	C	T	C	0.0636	0.0071136	0.3159	0.308851	Bladder cancer	0.0555358	0.898077	GCST90274766	9	115519904	0.0127	5.5e-07	9_115519904_T_C	14718	C-C motif chemokine 20 levels	0.00170129	0.00174829	25.7729	42.6787	25.0788
rs34729167	T	C	T	C	0.0801	-0.208207	0.136	0.108462	Bladder cancer	0.0823814	0.0114926	GCST90274766	6	162943133	0.0179	7.65e-06	6_162943133_T_C	14288	C-C motif chemokine 20 levels	0.00139972	0.00150781	21.5732	42.6787	20.0244
rs348389	T	C	T	C	-0.055	0.0201214	0.3574	0.366894	Bladder cancer	0.053194	0.705234	GCST90274766	19	6535637	0.0124	9.19e-06	19_6535637_T_C	14288	C-C motif chemokine 20 levels	0.00137523	0.00138948	19.8777	42.6787	19.6735
rs35833676	T	C	T	C	0.0804	-0.0106024	0.1452	0.144402	Bladder cancer	0.0732556	0.884923	GCST90274766	21	32961256	0.0166	1.28e-06	21_32961256_T_C	14732	C-C motif chemokine 20 levels	0.00159002	0.00160462	23.6741	42.6787	23.4583
rs3798304	C	G	C	G	-0.0624	0.136631	0.7473	0.741243	Bladder cancer	0.0589183	0.0203952	GCST90274766	6	167363434	0.0138	6.13e-06	6_167363434_C_G	14287	C-C motif chemokine 20 levels	0.00142925	0.00147062	21.0387	42.6787	20.4461
rs41302923	A	G	A	G	0.1939	-0.00459772	0.9774	0.974005	Bladder cancer	0.161061	0.977226	GCST90274766	10	127693479	0.0414	2.82e-06	10_127693479_A_G	14726	C-C motif chemokine 20 levels	0.00148759	0.00166099	24.4971	42.6787	21.9359
rs4981022	A	G	A	G	0.0635	-0.031125	0.6933	0.683503	Bladder cancer	0.0563321	0.580587	GCST90274766	12	104149874	0.0128	7.02e-07	12_104149874_A_G	14721	C-C motif chemokine 20 levels	0.00166926	0.0017148	25.2834	42.6787	24.6109
rs55891514	T	C	T	C	0.0955	-0.0926663	0.9122	0.894649	Bladder cancer	0.0832777	0.265821	GCST90274766	5	40408939	0.0213	7.34e-06	5_40408939_T_C	14735	C-C motif chemokine 20 levels	0.00136259	0.0014609	21.555	42.6787	20.1024
rs5769672	T	G	T	G	-0.1184	-0.119029	0.9406	0.948182	Bladder cancer	0.11556	0.302997	GCST90274766	22	49877754	0.0257	4.09e-06	22_49877754_T_G	14732	C-C motif chemokine 20 levels	0.00143883	0.00156648	23.1105	42.6787	21.2245
rs61945278	T	C	T	C	-0.2	0.449065	0.028	0.0159038	Bladder cancer	0.206989	0.0300437	GCST90274766	13	24524337	0.0451	9.22e-06	13_24524337_T_C	13386	C-C motif chemokine 20 levels	0.00146718	0.00217728	29.2043	42.6787	19.6656
rs62456601	T	C	T	C	0.0611	-0.0568581	0.6697	0.682634	Bladder cancer	0.055667	0.307066	GCST90274766	7	55791153	0.0137	8.2e-06	7_55791153_T_C	12836	C-C motif chemokine 20 levels	0.00154741	0.00165159	21.2315	42.6787	19.8903
rs6420556	T	C	T	C	-0.0736	-0.123353	0.1755	0.161236	Bladder cancer	0.0704085	0.0797809	GCST90274766	18	56487606	0.0158	3.19e-06	18_56487606_T_C	14288	C-C motif chemokine 20 levels	0.0015166	0.00156767	22.4308	42.6787	21.6991
rs6498926	A	T	A	T	0.0616	-0.056921	0.3426	0.329273	Bladder cancer	0.0558272	0.307921	GCST90274766	16	63795822	0.0134	4.29e-06	16_63795822_A_T	12844	C-C motif chemokine 20 levels	0.00164288	0.00170926	21.9879	42.6787	21.1325
rs73072893	A	G	A	G	0.2057	0.0973794	0.9739	0.976658	Bladder cancer	0.170639	0.568221	GCST90274766	12	19657540	0.0422	1.09e-06	12_19657540_A_G	13230	C-C motif chemokine 20 levels	0.00179296	0.00215107	28.5156	42.6787	23.7598
rs742493	T	C	T	C	0.1459	-0.229985	0.883	0.887936	Bladder cancer	0.0816081	0.00482993	GCST90274766	6	40998167	0.0185	3.11e-15	6_40998167_T_C	14735	C-C motif chemokine 20 levels	0.00420384	0.00439832	65.0868	42.6787	62.1967
rs748503	T	C	T	C	-0.0722	-0.137082	0.1993	0.151463	Bladder cancer	0.073486	0.0621223	GCST90274766	10	73509465	0.0162	8.32e-06	10_73509465_T_C	14288	C-C motif chemokine 20 levels	0.00138845	0.00166373	23.8076	42.6787	19.863
rs7749768	T	G	T	G	-0.0622	-0.0765038	0.754	0.744624	Bladder cancer	0.0598203	0.200934	GCST90274766	6	107477601	0.0138	6.57e-06	6_107477601_T_G	14709	C-C motif chemokine 20 levels	0.00137943	0.00143522	21.1381	42.6787	20.3153
rs9274623	T	G	T	G	-0.076	-0.0597899	0.215	0.242631	Bladder cancer	0.0604353	0.322506	GCST90274766	6	32635998	0.0148	2.82e-07	6_32635998_T_G	14288	C-C motif chemokine 20 levels	0.00184243	0.00194969	27.9077	42.6787	26.3696
rs9357723	A	G	A	G	0.0522	0.0277787	0.4744	0.487235	Bladder cancer	0.0514729	0.58942	GCST90274766	6	51953097	0.0116	6.8e-06	6_51953097_A_G	14735	C-C motif chemokine 20 levels	0.00137258	0.00135885	20.0472	42.6787	20.25
rs1001495	T	C	T	C	0.0983	-0.101984	0.9113	0.915695	Bladder cancer	0.0920784	0.268043	GCST90274767	2	241647342	0.0215	4.83e-06	2_241647342_T_C	13650	C-C motif chemokine 23 levels	0.00152931	0.00156215	21.3535	42.6787	20.904
rs11017721	A	G	A	G	0.0971	0.0377257	0.1154	0.115872	Bladder cancer	0.0805528	0.639545	GCST90274767	10	132905425	0.0186	1.79e-07	10_132905425_A_G	14288	C-C motif chemokine 23 levels	0.00190403	0.00192496	27.553	42.6787	27.2529
rs112492	A	G	A	G	-0.0692	0.0238045	0.7293	0.745709	Bladder cancer	0.059023	0.686721	GCST90274767	11	1989274	0.014	7.7e-07	11_1989274_A_G	13224	C-C motif chemokine 23 levels	0.00184441	0.00189076	25.047	42.6787	24.4318
rs11285223	T	C	T	C	-0.0671	0.163215	0.6941	0.689835	Bladder cancer	0.0579526	0.0048571	GCST90274767	7	34711511	0.0149	6.69e-06	7_34711511_T_C	10894	C-C motif chemokine 23 levels	0.00185848	0.00191195	20.8649	42.6787	20.2802
rs113959305	T	C	T	C	-0.1397	0.1133	0.0559	0.0543692	Bladder cancer	0.115013	0.324573	GCST90274767	22	51076281	0.0285	9.5e-07	22_51076281_T_C	13224	C-C motif chemokine 23 levels	0.00181392	0.00205993	27.2926	42.6787	24.0272
rs117639761	A	C	A	C	-0.3246	-0.008987	0.9561	0.980989	Bladder cancer	0.188623	0.961999	GCST90274767	17	34195180	0.0413	3.85e-15	17_34195180_A_C	14736	C-C motif chemokine 23 levels	0.00417503	0.00884494	131.484	42.6787	61.7727
rs12103669	A	G	A	G	-0.1778	0.0126084	0.0234	0.0238852	Bladder cancer	0.167603	0.940034	GCST90274767	17	47298101	0.0402	9.74e-06	17_47298101_A_G	14734	C-C motif chemokine 23 levels	0.00132609	0.00144486	21.3165	42.6787	19.5619
rs12204524	C	G	C	G	0.1164	0.148578	0.9291	0.915969	Bladder cancer	0.0938579	0.113418	GCST90274767	6	86144743	0.0237	9.04e-07	6_86144743_C_G	14727	C-C motif chemokine 23 levels	0.00163547	0.00178503	26.3315	42.6787	24.1218
rs12949647	A	G	A	G	-0.0643	-0.0392736	0.7287	0.72572	Bladder cancer	0.0577887	0.496753	GCST90274767	17	21386459	0.0137	2.69e-06	17_21386459_A_G	14288	C-C motif chemokine 23 levels	0.00153958	0.00163475	23.3922	42.6787	22.0283
rs143910182	T	C	T	C	0.2157	-0.0224597	0.0255	0.0117586	Bladder cancer	0.242569	0.926229	GCST90274767	3	6127208	0.0449	1.56e-06	3_6127208_T_C	14730	C-C motif chemokine 23 levels	0.00156453	0.00231234	34.1351	42.6787	23.0785
rs146074782	A	G	A	G	-0.3061	0.0486429	0.0116	0.010749	Bladder cancer	0.250153	0.845821	GCST90274767	1	203441260	0.0626	1.01e-06	1_203441260_A_G	12935	C-C motif chemokine 23 levels	0.00184534	0.00214856	27.8472	42.6787	23.9099
rs17092563	C	G	C	G	-0.202	0.0320272	0.9774	0.990454	Bladder cancer	0.264715	0.903701	GCST90274767	10	116653091	0.0445	5.64e-06	10_116653091_C_G	14733	C-C motif chemokine 23 levels	0.00139683	0.00180266	26.6029	42.6787	20.6055
rs17735284	A	T	A	T	0.0927	0.0447807	0.0922	0.0942235	Bladder cancer	0.088261	0.611898	GCST90274767	11	84372512	0.0202	4.45e-06	11_84372512_A_T	14725	C-C motif chemokine 23 levels	0.00142837	0.0014385	21.2096	42.6787	21.0599
rs1926742	A	G	A	G	0.0574	-0.0988731	0.3093	0.30743	Bladder cancer	0.055892	0.0768934	GCST90274767	10	18295482	0.0125	4.39e-06	10_18295482_A_G	14725	C-C motif chemokine 23 levels	0.00143016	0.00140774	20.7554	42.6787	21.0865
rs2263318	A	G	A	G	-0.1027	0.0368326	0.0765	0.087918	Bladder cancer	0.0901688	0.682918	GCST90274767	6	31432006	0.0232	9.57e-06	6_31432006_A_G	14735	C-C motif chemokine 23 levels	0.0013283	0.00149029	21.9891	42.6787	19.5959
rs2870238	T	C	T	C	0.0574	-0.0196554	0.4869	0.502257	Bladder cancer	0.0514359	0.702362	GCST90274767	4	77373079	0.0114	4.78e-07	4_77373079_T_C	14736	C-C motif chemokine 23 levels	0.0017177	0.00164625	24.2958	42.6787	25.3521
rs2905095	T	C	T	C	0.0664	-0.0125727	0.3078	0.312131	Bladder cancer	0.0553213	0.820215	GCST90274767	9	135902793	0.0148	7.24e-06	9_135902793_T_C	11337	C-C motif chemokine 23 levels	0.00177264	0.00187874	21.3356	42.6787	20.1286
rs376974828	T	C	T	C	-0.1724	-0.00647697	0.0385	0.0236426	Bladder cancer	0.172881	0.970114	GCST90274767	19	11626019	0.039	9.85e-06	19_11626019_T_C	10696	C-C motif chemokine 23 levels	0.00182395	0.00220046	23.5837	42.6787	19.5409
rs4317138	T	C	T	C	0.0585	-0.0411715	0.6736	0.668253	Bladder cancer	0.0550735	0.454718	GCST90274767	3	46462144	0.0127	4.1e-06	3_46462144_T_C	14288	C-C motif chemokine 23 levels	0.00148303	0.00150485	21.5307	42.6787	21.218
rs438811	T	C	T	C	0.0669	-0.0571721	0.2405	0.235173	Bladder cancer	0.0608263	0.347256	GCST90274767	19	45416741	0.0138	1.25e-06	19_45416741_T_C	14720	C-C motif chemokine 23 levels	0.00159424	0.00163503	24.1037	42.6787	23.5014
rs4719850	T	C	T	C	-0.0548	-0.0602394	0.5907	0.57838	Bladder cancer	0.0523413	0.249775	GCST90274767	7	3238978	0.0118	3.42e-06	7_3238978_T_C	14726	C-C motif chemokine 23 levels	0.00146263	0.00145211	21.412	42.6787	21.5674
rs536720979	A	G	A	G	0.2618	0.120261	0.0138	0.0117475	Bladder cancer	0.23875	0.614463	GCST90274767	13	46239903	0.0591	9.43e-06	13_46239903_A_G	11760	C-C motif chemokine 23 levels	0.00166612	0.00186558	21.9765	42.6787	19.623
rs55755820	T	G	T	G	-0.1035	-0.00724086	0.899	0.913087	Bladder cancer	0.0942044	0.938732	GCST90274767	1	245606006	0.0228	5.64e-06	1_245606006_T_G	11538	C-C motif chemokine 23 levels	0.00178312	0.00194532	22.485	42.6787	20.6068
rs6497967	T	C	T	C	-0.0547	-0.00920644	0.3198	0.320423	Bladder cancer	0.0550893	0.867277	GCST90274767	16	26890471	0.0123	8.7e-06	16_26890471_T_C	14729	C-C motif chemokine 23 levels	0.00134112	0.00130173	19.1955	42.6787	19.7772
rs712048	A	C	A	C	-0.5147	-0.076497	0.1497	0.129747	Bladder cancer	0.076506	0.317368	GCST90274767	17	34326215	0.0158	8.99e-233	17_34326215_A_C	14723	C-C motif chemokine 23 levels	0.0672399	0.0674423	1064.62	42.6787	1061.19
rs7225405	T	G	T	G	-0.2256	-0.168895	0.0643	0.0356404	Bladder cancer	0.142345	0.235418	GCST90274767	17	34140999	0.0291	9e-15	17_34140999_T_G	11538	C-C motif chemokine 23 levels	0.00518299	0.00612429	71.0852	42.6787	60.1025
rs73071153	A	G	A	G	-0.1497	-0.0452502	0.0393	0.0314667	Bladder cancer	0.146965	0.75816	GCST90274767	7	17545964	0.0319	2.7e-06	7_17545964_A_G	14728	C-C motif chemokine 23 levels	0.00149324	0.00169221	24.9617	42.6787	22.0223
rs73114426	A	G	A	G	0.0948	-0.0274915	0.0846	0.080733	Bladder cancer	0.0945103	0.77114	GCST90274767	12	57405049	0.0207	4.66e-06	12_57405049_A_G	14731	C-C motif chemokine 23 levels	0.00142195	0.00139196	20.5308	42.6787	20.9737
rs74491711	A	G	A	G	0.1273	-0.137707	0.048	0.0393756	Bladder cancer	0.132484	0.298607	GCST90274767	3	40054358	0.0278	4.67e-06	3_40054358_A_G	14735	C-C motif chemokine 23 levels	0.00142121	0.00148103	21.8524	42.6787	20.9685
rs77083410	C	G	C	G	0.224	0.339152	0.0223	0.0114904	Bladder cancer	0.242616	0.162144	GCST90274767	11	115081786	0.0416	7.26e-08	11_115081786_C_G	14734	C-C motif chemokine 23 levels	0.00196424	0.00218795	32.3035	42.6787	28.9941
rs77354000	A	G	A	G	-0.2064	-0.0483747	0.9788	0.978562	Bladder cancer	0.178062	0.785873	GCST90274767	10	34433796	0.0437	2.32e-06	10_34433796_A_G	14735	C-C motif chemokine 23 levels	0.00151185	0.00176799	26.0939	42.6787	22.3078
rs77527696	T	C	T	C	-0.2538	0.3702	0.0298	0.0116194	Bladder cancer	0.240137	0.123166	GCST90274767	17	34816052	0.0465	4.81e-08	17_34816052_T_C	13829	C-C motif chemokine 23 levels	0.00214988	0.0037247	51.6939	42.6787	29.7905
rs79960240	T	G	T	G	-0.2384	0.0091331	0.0143	0.0174253	Bladder cancer	0.195098	0.962662	GCST90274767	14	94811056	0.0537	9.02e-06	14_94811056_T_G	14249	C-C motif chemokine 23 levels	0.00138147	0.00160222	22.8635	42.6787	19.709
rs80014265	T	C	T	C	0.1307	0.0803814	0.0514	0.0479897	Bladder cancer	0.119045	0.499538	GCST90274767	9	94180109	0.0289	6.11e-06	9_94180109_T_C	14736	C-C motif chemokine 23 levels	0.00138622	0.00166582	24.5851	42.6787	20.4529
rs10792444	T	C	T	C	-0.0865	-0.140615	0.8838	0.905313	Bladder cancer	0.0883344	0.111418	GCST90274768	11	64434151	0.0181	1.76e-06	11_64434151_T_C	14732	C-C motif chemokine 25 levels	0.0015481	0.00153682	22.6722	42.6787	22.8389
rs111437511	T	C	T	C	0.1437	-0.128298	0.0428	0.0449366	Bladder cancer	0.124075	0.301117	GCST90274768	8	10694001	0.0297	1.31e-06	8_10694001_T_C	14733	C-C motif chemokine 25 levels	0.00158664	0.00169196	24.9665	42.6787	23.41
rs113348389	T	C	T	C	-0.7068	0.0624098	0.9728	0.975784	Bladder cancer	0.168786	0.711563	GCST90274768	19	8158245	0.0379	1.28e-77	19_8158245_T_C	14721	C-C motif chemokine 25 levels	0.0230831	0.0264372	399.696	42.6787	347.788
rs116534774	T	C	T	C	0.3717	-0.384783	0.9916	0.992101	Bladder cancer	0.28673	0.179606	GCST90274768	9	125200862	0.0777	1.72e-06	9_125200862_T_C	11139	C-C motif chemokine 25 levels	0.00205061	0.00230161	25.6921	42.6787	22.8846
rs143132666	A	C	A	C	-0.1934	-0.0202099	0.0225	0.0190666	Bladder cancer	0.189177	0.914923	GCST90274768	1	160762078	0.0406	1.9e-06	1_160762078_A_C	14734	C-C motif chemokine 25 levels	0.00153791	0.00164529	24.2783	42.6787	22.6914
rs17683663	T	C	T	C	-0.1198	-0.0205538	0.0745	0.0719355	Bladder cancer	0.0991467	0.83577	GCST90274768	8	42081422	0.0226	1.15e-07	8_42081422_T_C	14730	C-C motif chemokine 25 levels	0.00190426	0.00197914	29.2066	42.6787	28.0994
rs184092631	A	C	A	C	0.2448	0.17223	0.9809	0.984747	Bladder cancer	0.211531	0.415527	GCST90274768	19	8276989	0.0466	1.49e-07	19_8276989_A_C	14736	C-C motif chemokine 25 levels	0.00186947	0.00224549	33.1595	42.6787	27.5963
rs2078037	A	C	A	C	0.0662	0.00494388	0.7599	0.757347	Bladder cancer	0.0603695	0.934731	GCST90274768	18	2519969	0.0136	1.13e-06	18_2519969_A_C	14712	C-C motif chemokine 25 levels	0.00160815	0.00159917	23.5615	42.6787	23.694
rs2287936	A	G	A	G	0.7276	0.121014	0.1067	0.085481	Bladder cancer	0.0916282	0.1866	GCST90274768	19	8127331	0.0191	1e-300	19_8127331_A_G	14288	C-C motif chemokine 25 levels	0.092213	0.10092	1603.58	42.6787	1451.17
rs485073	A	G	A	G	0.3098	0.115136	0.5286	0.46489	Bladder cancer	0.0513444	0.0249332	GCST90274768	19	49207255	0.0113	1.77e-165	19_49207255_A_G	14735	C-C motif chemokine 25 levels	0.0485406	0.047831	740.094	42.6787	751.633
rs549735081	T	C	T	C	-0.4672	0.0758137	0.9355	0.941743	Bladder cancer	0.111312	0.495814	GCST90274768	19	8123295	0.028	1.67e-62	19_8123295_T_C	11327	C-C motif chemokine 25 levels	0.0239941	0.0263414	306.387	42.6787	278.413
rs635634	T	C	T	C	-0.2482	0.0809805	0.1875	0.184394	Bladder cancer	0.0667465	0.225033	GCST90274768	9	136155000	0.0166	1.52e-50	9_136155000_T_C	11785	C-C motif chemokine 25 levels	0.0186195	0.0187697	225.394	42.6787	223.557
rs7137942	A	G	A	G	-0.0637	-0.0830971	0.6502	0.636844	Bladder cancer	0.0550501	0.131175	GCST90274768	12	81177765	0.0133	1.67e-06	12_81177765_A_G	12404	C-C motif chemokine 25 levels	0.00184621	0.00184576	22.9335	42.6787	22.9391
rs7296588	A	G	A	G	-0.1159	0.0306917	0.4365	0.432791	Bladder cancer	0.0518431	0.553843	GCST90274768	12	578100	0.0116	1.66e-23	12_578100_A_G	14725	C-C motif chemokine 25 levels	0.00673472	0.00660808	97.9379	42.6787	99.8277
rs72995492	A	T	A	T	0.2394	0.2566	0.0243	0.0150324	Bladder cancer	0.213617	0.229668	GCST90274768	19	8260355	0.042	1.2e-08	19_8260355_A_T	14716	C-C motif chemokine 25 levels	0.00220324	0.0027177	40.0971	42.6787	32.49
rs851850	A	G	A	G	-0.0777	0.00705525	0.846	0.861443	Bladder cancer	0.074755	0.924809	GCST90274768	6	67085077	0.0163	1.87e-06	6_67085077_A_G	14288	C-C motif chemokine 25 levels	0.00158806	0.00157313	22.5091	42.6787	22.7231
rs112641086	T	C	T	C	-0.1056	-0.11791	0.0895	0.0809841	Bladder cancer	0.0943232	0.211276	GCST90274769	2	207076122	0.0198	9.64e-08	2_207076122_T_C	14731	C-C motif chemokine 28 levels	0.00192746	0.00181744	26.8179	42.6787	28.4444
rs116782490	A	C	A	C	0.2298	-0.0634786	0.9815	0.987246	Bladder cancer	0.232007	0.784387	GCST90274769	5	84924989	0.0488	2.49e-06	5_84924989_A_C	12633	C-C motif chemokine 28 levels	0.00175251	0.00191775	24.2696	42.6787	22.1748
rs11754249	A	G	A	G	0.0934	-0.087359	0.1058	0.110915	Bladder cancer	0.0820176	0.28682	GCST90274769	6	145107700	0.0205	5.21e-06	6_145107700_A_G	11779	C-C motif chemokine 28 levels	0.00175949	0.00165061	19.4714	42.6787	20.758
rs118111688	A	T	A	T	0.1874	-0.102897	0.9776	0.982086	Bladder cancer	0.194328	0.596457	GCST90274769	7	12554637	0.0424	9.88e-06	7_12554637_A_T	13374	C-C motif chemokine 28 levels	0.00145874	0.00153808	20.5989	42.6787	19.5347
rs12589600	A	G	A	G	0.051	-0.0113441	0.5556	0.542391	Bladder cancer	0.0521206	0.827701	GCST90274769	14	86936828	0.0114	7.69e-06	14_86936828_A_G	14711	C-C motif chemokine 28 levels	0.00135881	0.00128442	18.9168	42.6787	20.0139
rs139902	A	C	A	C	0.0684	-0.0258558	0.3659	0.368215	Bladder cancer	0.0534674	0.628684	GCST90274769	22	38406782	0.0121	1.58e-08	22_38406782_A_C	14285	C-C motif chemokine 28 levels	0.00223229	0.00217101	31.076	42.6787	31.9552
rs140404587	T	G	T	G	-0.2617	-0.281377	0.0119	0.00935385	Bladder cancer	0.270706	0.298609	GCST90274769	12	106453419	0.0587	8.26e-06	12_106453419_T_G	14241	C-C motif chemokine 28 levels	0.00139395	0.00161059	22.9702	42.6787	19.8761
rs141430371	A	G	A	G	-0.4948	0.0427431	0.9936	0.994396	Bladder cancer	0.347507	0.902108	GCST90274769	6	29556379	0.112	9.97e-06	6_29556379_A_G	6941	C-C motif chemokine 28 levels	0.00280483	0.00311373	21.6737	42.6787	19.5175
rs143400203	T	C	T	C	0.1812	-0.0168772	0.0244	0.0175351	Bladder cancer	0.196338	0.931498	GCST90274769	7	115560778	0.0392	3.79e-06	7_115560778_T_C	14722	C-C motif chemokine 28 levels	0.00144946	0.00156318	23.046	42.6787	21.367
rs150193318	A	G	A	G	0.2249	-0.353327	0.0212	0.0100057	Bladder cancer	0.25768	0.170318	GCST90274769	19	31385455	0.0501	7.16e-06	19_31385455_A_G	14286	C-C motif chemokine 28 levels	0.00140877	0.00209913	30.047	42.6787	20.1513
rs1514964	T	C	T	C	-0.1263	-0.108546	0.9486	0.957355	Bladder cancer	0.127613	0.395	GCST90274769	1	64836646	0.0264	1.72e-06	1_64836646_T_C	14734	C-C motif chemokine 28 levels	0.00155118	0.00155555	22.952	42.6787	22.8875
rs17098842	A	G	A	G	0.1458	-0.0831708	0.9674	0.964337	Bladder cancer	0.137744	0.545973	GCST90274769	1	76835048	0.0321	5.57e-06	1_76835048_A_G	14732	C-C motif chemokine 28 levels	0.0013986	0.00134081	19.7767	42.6787	20.6303
rs2477954	T	C	T	C	-0.058	-0.0213185	0.6211	0.623667	Bladder cancer	0.0531757	0.688489	GCST90274769	10	90264140	0.012	1.34e-06	10_90264140_T_C	14286	C-C motif chemokine 28 levels	0.0016328	0.00158333	22.6522	42.6787	23.3611
rs2631360	A	G	A	G	0.0597	-0.0895994	0.5481	0.518933	Bladder cancer	0.0513701	0.081125	GCST90274769	5	131707429	0.0128	3.1e-06	5_131707429_A_G	11780	C-C motif chemokine 28 levels	0.00184355	0.00176555	20.8315	42.6787	21.7535
rs28384995	A	T	A	T	-0.0866	-0.133381	0.8668	0.876198	Bladder cancer	0.0818786	0.103312	GCST90274769	15	91295829	0.0194	8.05e-06	15_91295829_A_T	14286	C-C motif chemokine 28 levels	0.00139308	0.00173176	24.7794	42.6787	19.9266
rs2866626	C	G	C	G	-0.0597	0.0257288	0.6079	0.625502	Bladder cancer	0.054488	0.636789	GCST90274769	4	102569209	0.0121	8.06e-07	4_102569209_C_G	14285	C-C motif chemokine 28 levels	0.00170145	0.00169906	24.3089	42.6787	24.3432
rs3823797	A	G	A	G	-0.058	-0.00283843	0.7423	0.770854	Bladder cancer	0.0616427	0.963273	GCST90274769	7	77694740	0.0128	5.86e-06	7_77694740_A_G	14732	C-C motif chemokine 28 levels	0.00139196	0.001287	18.982	42.6787	20.5322
rs4346241	A	G	A	G	0.0907	-0.112935	0.9021	0.904165	Bladder cancer	0.0872674	0.195623	GCST90274769	17	8580609	0.0204	8.75e-06	17_8580609_A_G	14286	C-C motif chemokine 28 levels	0.00138199	0.00145305	20.7856	42.6787	19.7676
rs4866742	T	C	T	C	0.0702	-0.0150383	0.4126	0.395269	Bladder cancer	0.0534872	0.77859	GCST90274769	5	43405459	0.0122	8.71e-09	5_43405459_T_C	12829	C-C motif chemokine 28 levels	0.0025746	0.00238873	30.7136	42.6787	33.1096
rs546951873	A	G	A	G	0.3427	0.143597	0.0122	0.00973321	Bladder cancer	0.260914	0.582073	GCST90274769	12	55558442	0.0672	3.4e-07	12_55558442_A_G	11273	C-C motif chemokine 28 levels	0.00230211	0.00283066	31.9949	42.6787	26.007
rs6580980	A	G	A	G	-0.0688	-0.0626792	0.4015	0.43433	Bladder cancer	0.052086	0.22883	GCST90274769	12	54692061	0.0118	5.53e-09	12_54692061_A_G	14285	C-C motif chemokine 28 levels	0.00237444	0.00227487	32.5661	42.6787	33.9948
rs6671688	T	C	T	C	0.0534	-0.0155908	0.5411	0.580589	Bladder cancer	0.0525308	0.766625	GCST90274769	1	154994265	0.0116	4.16e-06	1_154994265_T_C	14286	C-C motif chemokine 28 levels	0.0014814	0.00141615	20.2569	42.6787	21.1917
rs71363004	C	G	C	G	0.2181	0.203003	0.9802	0.977936	Bladder cancer	0.175053	0.246187	GCST90274769	18	74179338	0.0466	2.87e-06	18_74179338_C_G	11982	C-C motif chemokine 28 levels	0.00182511	0.00184638	22.1606	42.6787	21.9048
rs73000929	A	G	A	G	-0.1935	-0.082967	0.0347	0.036997	Bladder cancer	0.135674	0.540856	GCST90274769	11	113953622	0.0355	5.02e-08	11_113953622_A_G	14734	C-C motif chemokine 28 levels	0.00201265	0.00250832	37.0456	42.6787	29.7102
rs74855027	T	C	T	C	0.1215	0.00233227	0.0639	0.0539391	Bladder cancer	0.113693	0.983633	GCST90274769	2	225265371	0.0271	7.35e-06	2_225265371_T_C	14286	C-C motif chemokine 28 levels	0.00140525	0.00176606	25.271	42.6787	20.1008
rs76291845	A	G	A	G	0.2696	0.126856	0.9859	0.986576	Bladder cancer	0.22239	0.568394	GCST90274769	2	111889358	0.0542	6.55e-07	2_111889358_A_G	14244	C-C motif chemokine 28 levels	0.00173427	0.00202079	28.8384	42.6787	24.7424
rs7661151	T	C	T	C	0.0531	-0.0159547	0.6323	0.631404	Bladder cancer	0.0532003	0.764254	GCST90274769	4	157065076	0.0116	4.7e-06	4_157065076_T_C	14730	C-C motif chemokine 28 levels	0.00142073	0.0013111	19.3352	42.6787	20.9543
rs77569365	T	G	T	G	0.129	-0.079296	0.9561	0.95732	Bladder cancer	0.127823	0.535022	GCST90274769	13	106647340	0.0282	4.77e-06	13_106647340_T_G	14734	C-C motif chemokine 28 levels	0.00141841	0.00139694	20.6085	42.6787	20.9258
rs78552613	T	C	T	C	-0.1844	0.0551091	0.0271	0.0299629	Bladder cancer	0.150634	0.714478	GCST90274769	10	105492625	0.0395	3.04e-06	10_105492625_T_C	14734	C-C motif chemokine 28 levels	0.00147715	0.00179304	26.4625	42.6787	21.7935
rs78843608	A	G	A	G	-0.1684	0.25769	0.0376	0.0390182	Bladder cancer	0.134188	0.0548107	GCST90274769	5	102824347	0.0323	1.85e-07	5_102824347_A_G	14725	C-C motif chemokine 28 levels	0.00184282	0.00205238	30.2793	42.6787	27.1819
rs79205279	A	G	A	G	0.1063	0.0830407	0.0645	0.0598246	Bladder cancer	0.107684	0.440618	GCST90274769	3	124901642	0.024	9.46e-06	3_124901642_A_G	13854	C-C motif chemokine 28 levels	0.00141422	0.00136364	18.9149	42.6787	19.6175
rs7958187	A	G	A	G	-0.055	0.0998026	0.3872	0.397113	Bladder cancer	0.0534836	0.0620357	GCST90274769	12	69466941	0.0122	6.54e-06	12_69466941_A_G	13420	C-C motif chemokine 28 levels	0.00151238	0.00143552	19.2895	42.6787	20.3238
rs79683119	A	C	A	C	0.159	-0.0741696	0.0266	0.0241373	Bladder cancer	0.167639	0.658174	GCST90274769	2	56679291	0.0358	8.94e-06	2_56679291_A_C	14734	C-C motif chemokine 28 levels	0.00133717	0.00130917	19.312	42.6787	19.7255
rs801520	A	C	A	C	0.0779	0.0314851	0.1364	0.0990533	Bladder cancer	0.0858002	0.71365	GCST90274769	7	18702222	0.0171	5.22e-06	7_18702222_A_C	14732	C-C motif chemokine 28 levels	0.00140692	0.00142966	21.089	42.6787	20.7531
rs10990301	A	T	A	T	0.085	-0.0459509	0.8839	0.898999	Bladder cancer	0.0859053	0.592717	GCST90274770	9	105528047	0.0186	4.88e-06	9_105528047_A_T	14296	C-C motif chemokine 4 levels	0.00145889	0.00148287	21.2276	42.6787	20.8839
rs111476793	A	G	A	G	0.0869	0.0877637	0.1344	0.1283	Bladder cancer	0.0777916	0.25924	GCST90274770	4	53951496	0.019	4.79e-06	4_53951496_A_G	12800	C-C motif chemokine 4 levels	0.00163185	0.00175706	22.5264	42.6787	20.9186
rs112315344	T	G	T	G	0.2123	0.0923295	0.0284	0.021683	Bladder cancer	0.176627	0.601157	GCST90274770	5	33775793	0.0455	3.07e-06	5_33775793_T_G	14255	C-C motif chemokine 4 levels	0.00152513	0.00248734	35.5405	42.6787	21.7709
rs112356872	T	C	T	C	-0.2165	-0.525739	0.9805	0.983262	Bladder cancer	0.200054	0.00858939	GCST90274770	7	22212109	0.0478	5.92e-06	7_22212109_T_C	14743	C-C motif chemokine 4 levels	0.00138973	0.00179237	26.4688	42.6787	20.5145
rs112846979	T	C	T	C	-0.188	-0.162366	0.0228	0.0218962	Bladder cancer	0.175602	0.355162	GCST90274770	3	190832842	0.0414	5.6e-06	3_190832842_T_C	14296	C-C motif chemokine 4 levels	0.00144057	0.00157494	22.5477	42.6787	20.6213
rs113010081	T	C	T	C	-0.5767	-0.0497896	0.8759	0.887282	Bladder cancer	0.0817958	0.542719	GCST90274770	3	46457412	0.0184	1.24e-215	3_46457412_T_C	14296	C-C motif chemokine 4 levels	0.064305	0.072303	1114.05	42.6787	982.345
rs1161092	A	G	A	G	-0.0635	-0.00263922	0.6742	0.686219	Bladder cancer	0.0554773	0.962057	GCST90274770	12	67722012	0.0125	3.77e-07	12_67722012_A_G	14296	C-C motif chemokine 4 levels	0.00180215	0.0017714	25.3654	42.6787	25.8064
rs116193969	A	T	A	T	0.2915	0.485176	0.0134	0.00946135	Bladder cancer	0.26707	0.0692687	GCST90274770	2	236974412	0.0617	2.31e-06	2_236974412_A_T	14296	C-C motif chemokine 4 levels	0.00155911	0.00224674	32.1872	42.6787	22.3206
rs11619402	A	G	A	G	0.0672	0.0732696	0.7907	0.784994	Bladder cancer	0.0637273	0.250252	GCST90274770	13	43555687	0.015	7.46e-06	13_43555687_A_G	14296	C-C motif chemokine 4 levels	0.00140215	0.00149468	21.397	42.6787	20.0704
rs116309267	C	G	C	G	0.1956	-0.0702799	0.0299	0.0305841	Bladder cancer	0.14826	0.635478	GCST90274770	3	756117	0.0405	1.37e-06	3_756117_C_G	14723	C-C motif chemokine 4 levels	0.00158199	0.0022195	32.746	42.6787	23.3253
rs13100427	A	G	A	G	0.0533	0.0758756	0.56	0.558737	Bladder cancer	0.0518248	0.143172	GCST90274770	3	22458640	0.012	8.93e-06	3_22458640_A_G	14296	C-C motif chemokine 4 levels	0.00137828	0.00139999	20.0395	42.6787	19.7284
rs137896358	T	C	T	C	0.2797	0.142094	0.0186	0.0170876	Bladder cancer	0.199793	0.476957	GCST90274770	19	18917908	0.0551	3.85e-07	19_18917908_T_C	12745	C-C motif chemokine 4 levels	0.00201805	0.0028561	36.4996	42.6787	25.7681
rs140505982	T	C	T	C	-0.2294	-0.0030819	0.0248	0.0244966	Bladder cancer	0.165898	0.985179	GCST90274770	3	46459749	0.0415	3.24e-08	3_46459749_T_C	13865	C-C motif chemokine 4 levels	0.00219926	0.00254544	35.3774	42.6787	30.5556
rs143922263	A	G	A	G	0.2198	-0.170662	0.0203	0.0215154	Bladder cancer	0.174624	0.328413	GCST90274770	2	162240222	0.0497	9.75e-06	2_162240222_A_G	14296	C-C motif chemokine 4 levels	0.00136645	0.00192165	27.521	42.6787	19.5588
rs143960014	A	G	A	G	0.1953	0.216779	0.0228	0.0277124	Bladder cancer	0.156921	0.167141	GCST90274770	12	52285090	0.0416	2.67e-06	12_52285090_A_G	14257	C-C motif chemokine 4 levels	0.00154376	0.00169962	24.2694	42.6787	22.0403
rs148518028	T	C	T	C	0.1989	-0.238099	0.0317	0.0112156	Bladder cancer	0.243883	0.328924	GCST90274770	2	79469060	0.044	6.17e-06	2_79469060_T_C	14296	C-C motif chemokine 4 levels	0.00142755	0.00242867	34.7999	42.6787	20.4345
rs1634503	A	G	A	G	-0.0745	-0.00175781	0.2416	0.234068	Bladder cancer	0.0609453	0.97699	GCST90274770	17	34421139	0.0138	6.72e-08	17_34421139_A_G	14295	C-C motif chemokine 4 levels	0.00203491	0.00203394	29.1303	42.6787	29.1443
rs17692864	T	C	T	C	0.2321	-0.0106764	0.9406	0.94318	Bladder cancer	0.111325	0.923598	GCST90274770	17	34945214	0.0283	2.38e-16	17_34945214_T_C	13662	C-C motif chemokine 4 levels	0.00489997	0.00601966	82.7265	42.6787	67.2632
rs17792183	T	C	T	C	0.0763	0.0710854	0.8565	0.865623	Bladder cancer	0.0757923	0.348297	GCST90274770	6	22899548	0.017	7.18e-06	6_22899548_T_C	14296	C-C motif chemokine 4 levels	0.0014073	0.00143106	20.4849	42.6787	20.1443
rs183450854	C	G	C	G	0.2133	-0.157673	0.9802	0.982548	Bladder cancer	0.195609	0.420206	GCST90274770	20	50372747	0.0475	7.1e-06	20_50372747_C_G	14737	C-C motif chemokine 4 levels	0.00136663	0.001766	26.0681	42.6787	20.1648
rs42279	T	C	T	C	0.0743	-0.10268	0.1598	0.146562	Bladder cancer	0.0728979	0.158969	GCST90274770	5	11317698	0.0162	4.51e-06	5_11317698_T_C	14738	C-C motif chemokine 4 levels	0.00142544	0.00148241	21.8772	42.6787	21.0352
rs56131468	A	G	A	G	0.0833	0.0427825	0.1323	0.119282	Bladder cancer	0.079908	0.592376	GCST90274770	10	132716137	0.0178	2.87e-06	10_132716137_A_G	14296	C-C motif chemokine 4 levels	0.00152979	0.00159312	22.8084	42.6787	21.9003
rs5743614	T	C	T	C	0.0728	-0.00712502	0.2565	0.202325	Bladder cancer	0.0641529	0.911566	GCST90274770	4	38798935	0.0143	3.56e-07	4_38798935_T_C	12859	C-C motif chemokine 4 levels	0.00201176	0.00202144	26.0423	42.6787	25.9174
rs6100282	A	G	A	G	-0.0715	0.0439079	0.198	0.181789	Bladder cancer	0.0670049	0.512279	GCST90274770	20	57507885	0.0159	6.9e-06	20_57507885_A_G	12799	C-C motif chemokine 4 levels	0.0015777	0.00162361	20.8111	42.6787	20.2217
rs66822987	T	C	T	C	0.0648	-0.0605326	0.2289	0.218491	Bladder cancer	0.0627426	0.334657	GCST90274770	3	63106417	0.0146	9.06e-06	3_63106417_T_C	14296	C-C motif chemokine 4 levels	0.00137623	0.0014823	21.2195	42.6787	19.699
rs72800563	T	G	T	G	-0.1765	0.165208	0.9693	0.974415	Bladder cancer	0.162354	0.308879	GCST90274770	16	79338459	0.0374	2.37e-06	16_79338459_T_G	14741	C-C motif chemokine 4 levels	0.00150877	0.00185403	27.3773	42.6787	22.2713
rs78044056	A	G	A	G	-0.2607	0.254348	0.0138	0.0134119	Bladder cancer	0.221267	0.250347	GCST90274770	4	157055604	0.0552	2.33e-06	4_157055604_A_G	13809	C-C motif chemokine 4 levels	0.00161289	0.00184993	25.5894	42.6787	22.3051
rs8064426	A	G	A	G	-0.4104	-0.0917474	0.1459	0.122559	Bladder cancer	0.078616	0.243197	GCST90274770	17	34819750	0.0173	2.11e-124	17_34819750_A_G	14295	C-C motif chemokine 4 levels	0.0378815	0.0419767	626.262	42.6787	562.759
rs9818901	A	T	A	T	-0.1185	0.0885266	0.9445	0.952363	Bladder cancer	0.121392	0.465843	GCST90274770	3	152777012	0.0265	7.76e-06	3_152777012_A_T	14742	C-C motif chemokine 4 levels	0.00135475	0.00147218	21.732	42.6787	19.9961
rs10903115	A	G	A	G	-0.0559	0.0180752	0.4429	0.419522	Bladder cancer	0.0524437	0.730351	GCST90274771	1	25261696	0.0122	4.61e-06	1_25261696_A_G	14286	Natural killer cell receptor 2B4 levels	0.00146763	0.00154203	22.0604	42.6787	20.9944
rs11020961	A	G	A	G	0.0768	-0.109278	0.8167	0.823088	Bladder cancer	0.0684274	0.110268	GCST90274771	11	94575608	0.0161	1.84e-06	11_94575608_A_G	14287	Natural killer cell receptor 2B4 levels	0.00159037	0.00176595	25.2712	42.6787	22.7547
rs11220506	A	G	A	G	-0.0702	-0.135992	0.1876	0.175312	Bladder cancer	0.0676577	0.0444313	GCST90274771	11	126335329	0.0147	1.79e-06	11_126335329_A_G	14729	Natural killer cell receptor 2B4 levels	0.00154616	0.00150213	22.1551	42.6787	22.8055
rs11265488	A	G	A	G	-0.0624	0.0160263	0.4675	0.482906	Bladder cancer	0.051505	0.755679	GCST90274771	1	160773957	0.0118	1.24e-07	1_160773957_A_G	14287	Natural killer cell receptor 2B4 levels	0.00195378	0.00193865	27.7475	42.6787	27.9644
rs11265493	A	G	A	G	0.2122	-0.00686758	0.4066	0.38754	Bladder cancer	0.0529329	0.896771	GCST90274771	1	160803802	0.0119	3.99e-71	1_160803802_A_G	14287	Natural killer cell receptor 2B4 levels	0.0217749	0.0217288	317.29	42.6787	317.978
rs113798825	T	C	T	C	-0.3154	0.219983	0.9868	0.991601	Bladder cancer	0.281239	0.434103	GCST90274771	1	233431752	0.0695	5.68e-06	1_233431752_T_C	11273	Natural killer cell receptor 2B4 levels	0.00182389	0.00259153	29.285	42.6787	20.5946
rs114344979	T	C	T	C	0.1066	0.000297902	0.0652	0.0689734	Bladder cancer	0.101394	0.997656	GCST90274771	2	49094515	0.024	8.93e-06	2_49094515_T_C	14724	Natural killer cell receptor 2B4 levels	0.00133827	0.00138519	20.4211	42.6787	19.7284
rs114758826	A	G	A	G	-0.1804	0.0613472	0.0393	0.0295972	Bladder cancer	0.151139	0.684816	GCST90274771	4	174530615	0.0337	8.65e-08	4_174530615_A_G	14728	Natural killer cell receptor 2B4 levels	0.00194216	0.00245744	36.2775	42.6787	28.6558
rs139924614	A	G	A	G	0.1618	0.0945195	0.9666	0.960034	Bladder cancer	0.130614	0.469277	GCST90274771	22	17214005	0.0348	3.33e-06	22_17214005_A_G	14725	Natural killer cell receptor 2B4 levels	0.00146611	0.00169036	24.9294	42.6787	21.6172
rs140189694	A	T	A	T	0.2783	-0.620052	0.9887	0.987521	Bladder cancer	0.23468	0.00823887	GCST90274771	5	113042679	0.0621	7.41e-06	5_113042679_A_T	12934	Natural killer cell receptor 2B4 levels	0.00155061	0.00173061	22.4191	42.6787	20.0837
rs1434219	T	C	T	C	-0.0589	-0.0282638	0.4388	0.442067	Bladder cancer	0.0536032	0.598001	GCST90274771	2	79554556	0.0123	1.68e-06	2_79554556_T_C	14287	Natural killer cell receptor 2B4 levels	0.00160267	0.00170862	24.4494	42.6787	22.9309
rs145111742	T	C	T	C	0.3046	-0.638046	0.0304	0.00541788	Bladder cancer	0.351943	0.0698438	GCST90274771	9	129557272	0.0689	9.83e-06	9_129557272_T_C	12304	Natural killer cell receptor 2B4 levels	0.00158619	0.0054696	67.6571	42.6787	19.5444
rs145175118	T	C	T	C	0.2308	-0.121068	0.9818	0.98654	Bladder cancer	0.222685	0.586667	GCST90274771	8	92927069	0.052	9.06e-06	8_92927069_T_C	14287	Natural killer cell receptor 2B4 levels	0.00137717	0.00190369	27.2461	42.6787	19.6999
rs147033439	A	G	A	G	0.2053	-0.0935987	0.0249	0.0246397	Bladder cancer	0.163547	0.567117	GCST90274771	1	88677329	0.0411	5.88e-07	1_88677329_A_G	14731	Natural killer cell receptor 2B4 levels	0.00169116	0.00204671	30.2078	42.6787	24.9514
rs148214660	A	G	A	G	-0.2705	-0.117025	0.0131	0.00909121	Bladder cancer	0.27259	0.667698	GCST90274771	3	112589458	0.0612	9.87e-06	3_112589458_A_G	14287	Natural killer cell receptor 2B4 levels	0.00136571	0.00189195	27.0777	42.6787	19.5358
rs149458216	A	C	A	C	-0.2146	0.124256	0.0182	0.0163706	Bladder cancer	0.201655	0.537775	GCST90274771	16	48902293	0.047	4.97e-06	16_48902293_A_C	14725	Natural killer cell receptor 2B4 levels	0.00141401	0.00164583	24.2714	42.6787	20.848
rs149826608	A	G	A	G	-0.3587	0.595387	0.007	0.0062676	Bladder cancer	0.327027	0.0686666	GCST90274771	7	109234908	0.0807	8.8e-06	7_109234908_A_G	13156	Natural killer cell receptor 2B4 levels	0.00149971	0.00178871	23.5709	42.6787	19.7568
rs1574847	C	G	C	G	-0.0637	0.10742	0.2366	0.232232	Bladder cancer	0.0610471	0.0784716	GCST90274771	4	27611759	0.0139	4.59e-06	4_27611759_C_G	14287	Natural killer cell receptor 2B4 levels	0.00146802	0.0014658	20.9697	42.6787	21.0014
rs2554697	A	G	A	G	0.0627	-0.0967263	0.6347	0.655744	Bladder cancer	0.0541669	0.0741466	GCST90274771	8	3921805	0.0134	2.88e-06	8_3921805_A_G	11782	Natural killer cell receptor 2B4 levels	0.00185513	0.00182299	21.514	42.6787	21.894
rs3184504	T	C	T	C	0.116	-0.0138586	0.4764	0.482616	Bladder cancer	0.0512994	0.787043	GCST90274771	12	111884608	0.0128	1.27e-19	12_111884608_T_C	11784	Natural killer cell receptor 2B4 levels	0.00692246	0.00671301	79.6272	42.6787	82.1289
rs34826779	T	G	T	G	0.063	0.0670274	0.248	0.266298	Bladder cancer	0.0580911	0.248568	GCST90274771	8	106570964	0.0138	4.99e-06	8_106570964_T_G	14287	Natural killer cell receptor 2B4 levels	0.00145683	0.0014804	21.1789	42.6787	20.8412
rs3828139	T	C	T	C	0.0744	-0.0445022	0.4677	0.475459	Bladder cancer	0.0516902	0.389271	GCST90274771	1	44253015	0.0119	4.05e-10	1_44253015_T_C	14286	Natural killer cell receptor 2B4 levels	0.00272907	0.00275613	39.4774	42.6787	39.0888
rs4672486	A	G	A	G	0.0661	-0.0187696	0.4329	0.428893	Bladder cancer	0.0522577	0.719466	GCST90274771	2	62495209	0.0117	1.61e-08	2_62495209_A_G	14720	Natural killer cell receptor 2B4 levels	0.00216392	0.00214526	31.6418	42.6787	31.9177
rs56272634	T	C	T	C	0.0704	-0.0260492	0.6994	0.687629	Bladder cancer	0.0554066	0.638251	GCST90274771	2	111846068	0.0126	2.31e-08	2_111846068_T_C	14729	Natural killer cell receptor 2B4 levels	0.00211529	0.00208396	30.7546	42.6787	31.2179
rs60006581	A	G	A	G	0.0905	-0.0642932	0.9052	0.910851	Bladder cancer	0.0904073	0.476991	GCST90274771	21	38144075	0.0203	8.27e-06	21_38144075_A_G	14724	Natural killer cell receptor 2B4 levels	0.00134819	0.00140566	20.7232	42.6787	19.8749
rs61865960	T	C	T	C	0.2604	0.292996	0.9697	0.997031	Bladder cancer	0.48769	0.547984	GCST90274771	10	95662408	0.0584	8.24e-06	10_95662408_T_C	11810	Natural killer cell receptor 2B4 levels	0.00168093	0.00398467	47.2392	42.6787	19.8818
rs6928352	A	G	A	G	-0.1074	-0.00468128	0.0794	0.0777741	Bladder cancer	0.096347	0.961248	GCST90274771	6	614064	0.0215	5.87e-07	6_614064_A_G	14731	Natural killer cell receptor 2B4 levels	0.00169131	0.00168628	24.8792	42.6787	24.9535
rs72756898	C	G	C	G	0.2056	-0.30292	0.0192	0.0178403	Bladder cancer	0.194207	0.118811	GCST90274771	5	64185695	0.0454	5.94e-06	5_64185695_C_G	14734	Natural killer cell receptor 2B4 levels	0.00139017	0.00159205	23.4915	42.6787	20.5085
rs72837690	T	C	T	C	-0.0776	0.0288483	0.6405	0.652999	Bladder cancer	0.0541626	0.594294	GCST90274771	17	7088423	0.0125	5.37e-10	17_7088423_T_C	14287	Natural killer cell receptor 2B4 levels	0.00269062	0.00277314	39.7244	42.6787	38.5393
rs73173072	A	T	A	T	0.1576	-0.112841	0.9675	0.975627	Bladder cancer	0.168794	0.503804	GCST90274771	3	167513752	0.0353	8.02e-06	3_167513752_A_T	14718	Natural killer cell receptor 2B4 levels	0.00135265	0.00156198	23.0221	42.6787	19.9326
rs78142752	T	C	T	C	0.2288	-0.0570232	0.0184	0.00942269	Bladder cancer	0.270904	0.833283	GCST90274771	5	96078542	0.0497	4.15e-06	5_96078542_T_C	14734	Natural killer cell receptor 2B4 levels	0.00143652	0.00189101	27.9112	42.6787	21.1933
rs1081489	A	G	A	G	-0.0789	-0.0274829	0.8552	0.872105	Bladder cancer	0.0771738	0.721753	GCST90274772	10	84407842	0.0176	7.36e-06	10_84407842_A_G	12196	CD40L receptor levels	0.00164538	0.00154177	18.8294	42.6787	20.0969
rs117191103	T	C	T	C	0.3553	-0.211835	0.0208	0.0206312	Bladder cancer	0.180065	0.23942	GCST90274772	20	44464356	0.0437	4.28e-16	20_44464356_T_C	14736	CD40L receptor levels	0.00446645	0.00514227	76.1579	42.6787	66.104
rs11755766	T	C	T	C	-0.0504	0.149339	0.5049	0.514432	Bladder cancer	0.052103	0.00415389	GCST90274772	6	10178951	0.0112	6.8e-06	6_10178951_T_C	14735	CD40L receptor levels	0.00137258	0.00126996	18.7341	42.6787	20.25
rs12152184	A	G	A	G	0.1085	0.0719713	0.8849	0.899195	Bladder cancer	0.0856507	0.400747	GCST90274772	22	45002809	0.0205	1.21e-07	22_45002809_A_G	12402	CD40L receptor levels	0.00225398	0.00239805	29.8074	42.6787	28.0125
rs12500563	T	G	T	G	0.3143	-0.086975	0.9875	0.992427	Bladder cancer	0.301712	0.773139	GCST90274772	4	7304426	0.0687	4.76e-06	4_7304426_T_G	10795	CD40L receptor levels	0.00193549	0.00243874	26.3857	42.6787	20.9303
rs138739860	T	G	T	G	0.1632	0.0847482	0.9648	0.968032	Bladder cancer	0.147079	0.564474	GCST90274772	21	18103398	0.0351	3.33e-06	21_18103398_T_G	11979	CD40L receptor levels	0.00180175	0.00180905	21.7062	42.6787	21.6185
rs138897138	A	G	A	G	0.109	-0.015163	0.914	0.907353	Bladder cancer	0.0889755	0.864682	GCST90274772	2	122731427	0.0216	4.5e-07	2_122731427_A_G	14288	CD40L receptor levels	0.00177935	0.00186779	26.7332	42.6787	25.4651
rs144949926	A	G	A	G	-0.2655	0.344181	0.9784	0.997886	Bladder cancer	0.577147	0.550942	GCST90274772	3	20921481	0.0591	7.04e-06	3_20921481_A_G	14288	CD40L receptor levels	0.00141069	0.0029794	42.6909	42.6787	20.1815
rs149900704	A	G	A	G	-0.1956	-0.125768	0.0203	0.0124025	Bladder cancer	0.229292	0.583346	GCST90274772	8	111799116	0.0442	9.63e-06	8_111799116_A_G	14732	CD40L receptor levels	0.00132774	0.0015218	22.4502	42.6787	19.5836
rs17372980	T	C	T	C	-0.0611	-0.0249102	0.7421	0.729205	Bladder cancer	0.0580915	0.668062	GCST90274772	1	59140291	0.0134	5.12e-06	1_59140291_T_C	14288	CD40L receptor levels	0.00145322	0.00142898	20.4436	42.6787	20.7909
rs187640246	T	C	T	C	-0.2717	0.407633	0.0134	0.00485692	Bladder cancer	0.376388	0.278803	GCST90274772	20	30007295	0.0604	6.85e-06	20_30007295_T_C	12792	CD40L receptor levels	0.0015796	0.00195189	25.0135	42.6787	20.2351
rs1883832	T	C	T	C	-0.4519	0.0468848	0.2575	0.246054	Bladder cancer	0.0596583	0.431932	GCST90274772	20	44746982	0.0126	1.07e-281	20_44746982_T_C	14736	CD40L receptor levels	0.0802921	0.0780887	1248.02	42.6787	1286.3
rs34755276	A	G	A	G	0.0587	-0.00495732	0.3475	0.337737	Bladder cancer	0.0543379	0.927309	GCST90274772	19	57755822	0.0131	7.43e-06	19_57755822_A_G	12403	CD40L receptor levels	0.00161649	0.00156258	19.4078	42.6787	20.0786
rs35864161	T	G	T	G	-0.1269	0.150297	0.9543	0.951812	Bladder cancer	0.119875	0.209924	GCST90274772	17	66365155	0.0284	7.88e-06	17_66365155_T_G	14735	CD40L receptor levels	0.00135334	0.0014046	20.7232	42.6787	19.9658
rs3967170	A	G	A	G	0.0789	0.079759	0.1353	0.118785	Bladder cancer	0.079793	0.317517	GCST90274772	3	3773438	0.017	3.46e-06	3_3773438_A_G	14721	CD40L receptor levels	0.00146131	0.00145662	21.4713	42.6787	21.5405
rs404842	A	G	A	G	-0.0599	-0.0221946	0.6433	0.660935	Bladder cancer	0.0549199	0.686119	GCST90274772	16	84304113	0.0123	1.12e-06	16_84304113_A_G	14287	CD40L receptor levels	0.00165746	0.00164665	23.5611	42.6787	23.7161
rs4278412	C	G	C	G	0.1978	-0.0133405	0.0203	0.0205492	Bladder cancer	0.180459	0.94107	GCST90274772	1	211450157	0.0413	1.67e-06	1_211450157_C_G	14725	CD40L receptor levels	0.00155554	0.00155622	22.948	42.6787	22.9378
rs4664334	T	C	T	C	0.0541	0.0388342	0.5003	0.51609	Bladder cancer	0.0530334	0.46401	GCST90274772	2	161368905	0.0118	4.55e-06	2_161368905_T_C	14288	CD40L receptor levels	0.0014692	0.0014634	20.9368	42.6787	21.0199
rs551896428	T	C	T	C	-0.3275	-0.557637	0.9887	0.995611	Bladder cancer	0.395984	0.159063	GCST90274772	6	141740384	0.0705	3.39e-06	6_141740384_T_C	12778	CD40L receptor levels	0.00168623	0.0023966	30.6925	42.6787	21.5796
rs7250371	T	C	T	C	0.0686	0.000802099	0.3648	0.355628	Bladder cancer	0.0539027	0.988128	GCST90274772	19	57861085	0.0116	3.34e-09	19_57861085_T_C	14722	CD40L receptor levels	0.00237025	0.00218094	32.1736	42.6787	34.9729
rs73128569	A	T	A	T	-0.1788	-0.27768	0.9406	0.956184	Bladder cancer	0.126982	0.0287596	GCST90274772	20	44606446	0.0268	2.53e-11	20_44606446_A_T	14288	CD40L receptor levels	0.00310602	0.00357237	51.2178	42.6787	44.5108
rs75626299	C	G	C	G	0.1458	0.0439606	0.9638	0.966557	Bladder cancer	0.144221	0.760508	GCST90274772	9	29426599	0.0316	3.95e-06	9_29426599_C_G	14728	CD40L receptor levels	0.00144354	0.00148334	21.8761	42.6787	21.2883
rs7798473	A	C	A	C	-0.1041	0.235111	0.0609	0.0633442	Bladder cancer	0.105214	0.025444	GCST90274772	7	108543387	0.0235	9.43e-06	7_108543387_A_C	14734	CD40L receptor levels	0.00133023	0.00123954	18.2836	42.6787	19.623
rs8024256	A	G	A	G	-0.0562	-0.185677	0.3092	0.291512	Bladder cancer	0.056746	0.00106763	GCST90274772	15	26829521	0.0121	3.41e-06	15_26829521_A_G	14736	CD40L receptor levels	0.001462	0.00134926	19.9068	42.6787	21.5726
rs9526031	A	C	A	C	0.064	-0.0433447	0.4882	0.485197	Bladder cancer	0.0513907	0.398985	GCST90274772	13	45595067	0.012	9.64e-08	13_45595067_A_C	14288	CD40L receptor levels	0.00198711	0.00204686	29.3014	42.6787	28.4444
rs9993874	A	G	A	G	-0.0582	-0.00232542	0.4883	0.497654	Bladder cancer	0.0515756	0.964037	GCST90274772	4	55046724	0.0125	3.22e-06	4_55046724_A_G	12403	CD40L receptor levels	0.00174506	0.00169269	21.0267	42.6787	21.6783
rs11622090	T	C	T	C	-0.0588	-0.0407213	0.3206	0.327964	Bladder cancer	0.055048	0.459457	GCST90274773	14	93329692	0.0128	4.35e-06	14_93329692_T_C	13236	T-cell surface glycoprotein CD5 levels	0.00159203	0.00150617	19.9627	42.6787	21.1025
rs117276991	A	G	A	G	-0.1261	0.24648	0.0751	0.0659485	Bladder cancer	0.104541	0.0183872	GCST90274773	10	6251691	0.0256	8.4e-07	10_6251691_A_G	14287	T-cell surface glycoprotein CD5 levels	0.00169564	0.002209	31.6254	42.6787	24.2633
rs117516652	A	G	A	G	0.2374	0.124306	0.9826	0.982688	Bladder cancer	0.197081	0.528212	GCST90274773	13	39003323	0.0476	6.12e-07	13_39003323_A_G	14248	T-cell surface glycoprotein CD5 levels	0.001743	0.00192716	27.5073	42.6787	24.8741
rs12416520	A	G	A	G	-0.0629	0.0214429	0.7492	0.744815	Bladder cancer	0.059087	0.716677	GCST90274773	10	71211945	0.0132	1.89e-06	10_71211945_A_G	14709	T-cell surface glycoprotein CD5 levels	0.00154156	0.00148681	21.8991	42.6787	22.7067
rs1259355	A	G	A	G	0.0569	0.0058372	0.4361	0.463452	Bladder cancer	0.0516879	0.910085	GCST90274773	12	31688535	0.0119	1.74e-06	12_31688535_A_G	14287	T-cell surface glycoprotein CD5 levels	0.00159792	0.00159237	22.7832	42.6787	22.8629
rs138861398	A	C	A	C	-0.0803	0.0117514	0.2321	0.246991	Bladder cancer	0.0604056	0.845751	GCST90274773	4	77211819	0.0151	1.05e-07	4_77211819_A_C	11967	T-cell surface glycoprotein CD5 levels	0.00235798	0.00229848	27.5647	42.6787	28.2799
rs16541	A	G	A	G	-0.0679	0.0602729	0.7871	0.775232	Bladder cancer	0.0619737	0.330774	GCST90274773	17	37365138	0.015	5.99e-06	17_37365138_A_G	14287	T-cell surface glycoprotein CD5 levels	0.00143237	0.00154517	22.1069	42.6787	20.4907
rs17345759	A	C	A	C	-0.1134	-0.0455355	0.9301	0.943772	Bladder cancer	0.112932	0.686793	GCST90274773	7	97499410	0.0245	3.68e-06	7_97499410_A_C	14287	T-cell surface glycoprotein CD5 levels	0.00149749	0.0016721	23.926	42.6787	21.4237
rs17769062	T	C	T	C	0.1638	0.135844	0.9589	0.958419	Bladder cancer	0.128997	0.292303	GCST90274773	9	27496604	0.0334	9.38e-07	9_27496604_T_C	14287	T-cell surface glycoprotein CD5 levels	0.00168083	0.00211482	30.2742	42.6787	24.0511
rs192582121	A	T	A	T	-0.4169	0.360307	0.9916	0.993916	Bladder cancer	0.327661	0.271492	GCST90274773	9	105614669	0.0806	2.31e-07	9_105614669_A_T	11438	T-cell surface glycoprotein CD5 levels	0.00233402	0.00289541	33.208	42.6787	26.7543
rs193245191	A	G	A	G	-0.3109	-0.369517	0.0109	0.00641309	Bladder cancer	0.326034	0.257059	GCST90274773	11	102724025	0.0696	7.93e-06	11_102724025_A_G	12290	T-cell surface glycoprotein CD5 levels	0.0016212	0.00208419	25.6641	42.6787	19.9537
rs2237450	T	C	T	C	0.0623	0.064033	0.6389	0.62595	Bladder cancer	0.0536741	0.232871	GCST90274773	7	50716017	0.0124	5.06e-07	7_50716017_T_C	14287	T-cell surface glycoprotein CD5 levels	0.00176395	0.00179088	25.6286	42.6787	25.2425
rs3104373	T	C	T	C	0.0973	0.105489	0.1469	0.146729	Bladder cancer	0.0718786	0.142213	GCST90274773	6	32600375	0.0165	3.7e-09	6_32600375_T_C	14735	T-cell surface glycoprotein CD5 levels	0.00235474	0.00237289	35.0429	42.6787	34.7743
rs3184504	T	C	T	C	0.1427	-0.0138586	0.4764	0.482616	Bladder cancer	0.0512994	0.787043	GCST90274773	12	111884608	0.0128	7.29e-29	12_111884608_T_C	11784	T-cell surface glycoprotein CD5 levels	0.0104388	0.010159	120.921	42.6787	124.288
rs4073745	A	G	A	G	-0.0683	-0.109804	0.7003	0.709554	Bladder cancer	0.0573566	0.0555672	GCST90274773	5	176733341	0.0131	1.85e-07	5_176733341_A_G	14287	T-cell surface glycoprotein CD5 levels	0.0018993	0.00195813	28.0268	42.6787	27.1831
rs4893	A	G	A	G	0.1471	-0.217208	0.9627	0.960183	Bladder cancer	0.131577	0.0987787	GCST90274773	19	48833608	0.0313	2.61e-06	19_48833608_A_G	14735	T-cell surface glycoprotein CD5 levels	0.00149691	0.00155401	22.9309	42.6787	22.087
rs4939490	C	G	C	G	0.1083	-0.0485747	0.6328	0.60631	Bladder cancer	0.0526047	0.355804	GCST90274773	11	60793651	0.012	1.8e-19	11_60793651_C_G	14735	T-cell surface glycoprotein CD5 levels	0.00549805	0.00545075	80.746	42.6787	81.4506
rs563284470	A	G	A	G	0.1833	0.114997	0.9694	0.966812	Bladder cancer	0.143503	0.422926	GCST90274773	3	47239457	0.0391	2.76e-06	3_47239457_A_G	11720	T-cell surface glycoprotein CD5 levels	0.00187199	0.00199333	23.4045	42.6787	21.9772
rs60562286	A	T	A	T	-0.1681	0.152334	0.0327	0.0267009	Bladder cancer	0.159995	0.341036	GCST90274773	10	114454187	0.0352	1.79e-06	10_114454187_A_T	14726	T-cell surface glycoprotein CD5 levels	0.00154651	0.00178762	26.368	42.6787	22.8061
rs61747728	T	C	T	C	0.1841	0.00691179	0.0399	0.0382055	Bladder cancer	0.133475	0.958701	GCST90274773	1	179526214	0.0313	4.06e-09	1_179526214_T_C	14287	T-cell surface glycoprotein CD5 levels	0.00241595	0.00259673	37.1909	42.6787	34.5954
rs6488973	A	G	A	G	-0.0613	0.0272338	0.2804	0.290914	Bladder cancer	0.0585172	0.641647	GCST90274773	12	125487245	0.0135	5.61e-06	12_125487245_A_G	14722	T-cell surface glycoprotein CD5 levels	0.00139874	0.00151642	22.3556	42.6787	20.6183
rs674379	C	G	C	G	0.1193	-0.0379985	0.6395	0.602327	Bladder cancer	0.0527371	0.471201	GCST90274773	11	60922561	0.0126	2.85e-21	11_60922561_C_G	12835	T-cell surface glycoprotein CD5 levels	0.00693726	0.00656231	84.7704	42.6787	89.6478
rs7012814	A	G	A	G	-0.0533	0.0198057	0.4819	0.473855	Bladder cancer	0.0519463	0.703001	GCST90274773	8	9173358	0.0119	7.5e-06	8_9173358_A_G	14287	T-cell surface glycoprotein CD5 levels	0.0014024	0.00141858	20.2933	42.6787	20.0614
rs7242462	A	G	A	G	-0.1199	0.0391098	0.8853	0.89472	Bladder cancer	0.0836953	0.640294	GCST90274773	18	45545720	0.0187	1.44e-10	18_45545720_A_G	14287	T-cell surface glycoprotein CD5 levels	0.00286964	0.00291959	41.8285	42.6787	41.1107
rs72821405	T	C	T	C	-0.1014	-0.0161045	0.0833	0.0827096	Bladder cancer	0.0947336	0.865012	GCST90274773	6	4714797	0.0217	2.97e-06	6_4714797_T_C	14727	T-cell surface glycoprotein CD5 levels	0.00148067	0.00157028	23.1588	42.6787	21.8352
rs7295476	A	T	A	T	-0.118	0.00958549	0.0501	0.0461671	Bladder cancer	0.123123	0.937945	GCST90274773	12	74680262	0.0265	8.47e-06	12_74680262_A_T	14735	T-cell surface glycoprotein CD5 levels	0.00134399	0.00132529	19.5514	42.6787	19.8277
rs7298384	A	G	A	G	-0.1418	0.0196507	0.9625	0.958102	Bladder cancer	0.128579	0.878533	GCST90274773	12	129141888	0.032	9.37e-06	12_129141888_A_G	14718	T-cell surface glycoprotein CD5 levels	0.00133255	0.00145149	21.3912	42.6787	19.636
rs74796205	A	G	A	G	0.2987	-0.0976515	0.9884	0.989316	Bladder cancer	0.24878	0.694673	GCST90274773	8	67386869	0.0657	5.46e-06	8_67386869_A_G	13800	T-cell surface glycoprotein CD5 levels	0.0014958	0.00204593	28.2876	42.6787	20.67
rs78808574	A	G	A	G	-0.118	-0.0860659	0.9449	0.958438	Bladder cancer	0.129149	0.505151	GCST90274773	11	127558155	0.0265	8.47e-06	11_127558155_A_G	14287	T-cell surface glycoprotein CD5 levels	0.00138608	0.00144988	20.7416	42.6787	19.8277
rs11230863	A	G	A	G	0.0647	0.0267473	0.7396	0.72477	Bladder cancer	0.0579085	0.64416	GCST90274774	11	61779047	0.0133	1.15e-06	11_61779047_A_G	14731	T-cell surface glycoprotein CD6 isoform levels	0.00160411	0.00161241	23.7876	42.6787	23.6649
rs13109330	T	C	T	C	-0.0685	-0.0929495	0.3846	0.410797	Bladder cancer	0.0521799	0.0748591	GCST90274774	4	83102052	0.0129	1.1e-07	4_83102052_T_C	12404	T-cell surface glycoprotein CD6 isoform levels	0.00226842	0.00222115	27.608	42.6787	28.1969
rs1483572	A	C	A	C	0.0602	-0.16464	0.3374	0.311062	Bladder cancer	0.05565	0.00309147	GCST90274774	8	79635243	0.0124	1.2e-06	8_79635243_A_C	14287	T-cell surface glycoprotein CD6 isoform levels	0.00164723	0.00162039	23.1848	42.6787	23.5695
rs4938993	C	G	C	G	-0.5114	-0.0190116	0.2252	0.209714	Bladder cancer	0.0636209	0.765072	GCST90274774	11	60813632	0.0138	1.34e-300	11_60813632_C_G	14287	T-cell surface glycoprotein CD6 isoform levels	0.0877039	0.0912661	1434.67	42.6787	1373.29
rs494417	A	C	A	C	0.1149	0.0738017	0.6353	0.631091	Bladder cancer	0.0539194	0.171081	GCST90274774	11	60626627	0.012	1.02e-21	11_60626627_A_C	14731	T-cell surface glycoprotein CD6 isoform levels	0.00618599	0.00611765	90.6615	42.6787	91.6806
rs653178	T	C	T	C	-0.1085	0.0217556	0.5224	0.516634	Bladder cancer	0.05131	0.671564	GCST90274774	12	112007756	0.0131	1.21e-16	12_112007756_T_C	11784	T-cell surface glycoprotein CD6 isoform levels	0.00578864	0.00587431	69.6201	42.6787	68.5989
rs72969761	A	T	A	T	-0.1796	-0.0294333	0.97	0.974551	Bladder cancer	0.162844	0.856568	GCST90274774	2	227938476	0.0376	1.78e-06	2_227938476_A_T	14710	T-cell surface glycoprotein CD6 isoform levels	0.00154885	0.00187731	27.6634	42.6787	22.8159
rs9691968	A	C	A	C	0.0646	-0.0390602	0.2505	0.247476	Bladder cancer	0.0598418	0.513934	GCST90274774	7	153635380	0.0134	1.43e-06	7_153635380_A_C	14735	T-cell surface glycoprotein CD6 isoform levels	0.001575	0.00156702	23.1231	42.6787	23.241
rs10044847	C	G	C	G	-0.0781	-0.0292848	0.8283	0.855051	Bladder cancer	0.0733289	0.689626	GCST90274775	5	2103391	0.0156	5.55e-07	5_2103391_C_G	14719	CUB domain-containing protein 1 levels	0.00170018	0.00173496	25.5778	42.6787	25.0641
rs10465082	T	C	T	C	-0.0504	-0.0496801	0.5023	0.497614	Bladder cancer	0.0513284	0.333101	GCST90274775	9	35993938	0.0112	6.8e-06	9_35993938_T_C	14733	CUB domain-containing protein 1 levels	0.00137276	0.00127005	18.7329	42.6787	20.25
rs111476793	A	G	A	G	0.0895	0.0877637	0.1339	0.1283	Bladder cancer	0.0777916	0.25924	GCST90274775	4	53951496	0.0182	8.76e-07	4_53951496_A_G	12790	CUB domain-containing protein 1 levels	0.00188747	0.00185791	23.8032	42.6787	24.1826
rs111984955	C	G	C	G	0.2058	-0.00674588	0.9817	0.982579	Bladder cancer	0.198519	0.972892	GCST90274775	12	15991375	0.0461	8.04e-06	12_15991375_C_G	14725	CUB domain-containing protein 1 levels	0.00135178	0.00152178	22.4392	42.6787	19.9292
rs115009171	A	G	A	G	0.4223	0.138987	0.0078	0.00295906	Bladder cancer	0.47924	0.771804	GCST90274775	6	622484	0.0932	5.87e-06	6_622484_A_G	10300	CUB domain-containing protein 1 levels	0.00198972	0.00276036	28.5049	42.6787	20.531
rs118116993	A	T	A	T	0.0957	-0.0253601	0.0969	0.0840105	Bladder cancer	0.0925163	0.783996	GCST90274775	6	162326838	0.0197	1.19e-06	6_162326838_A_T	14286	CUB domain-containing protein 1 levels	0.00164939	0.00160293	22.933	42.6787	23.5989
rs11864674	A	C	A	C	0.2029	0.240563	0.0186	0.0155714	Bladder cancer	0.208421	0.24841	GCST90274775	16	66391749	0.0458	9.42e-06	16_66391749_A_C	14246	CUB domain-containing protein 1 levels	0.00137595	0.00150298	21.4407	42.6787	19.6261
rs12290068	A	G	A	G	0.1221	0.0692554	0.3187	0.323084	Bladder cancer	0.0551467	0.209174	GCST90274775	11	126261564	0.0122	1.4e-23	11_126261564_A_G	14726	CUB domain-containing protein 1 levels	0.00675681	0.00647413	95.9463	42.6787	100.164
rs12928188	A	T	A	T	-0.0658	0.0689702	0.2312	0.219007	Bladder cancer	0.0621817	0.267355	GCST90274775	16	79183747	0.0134	9.09e-07	16_79183747_A_T	14715	CUB domain-containing protein 1 levels	0.00163617	0.00153916	22.6805	42.6787	24.1125
rs1463919	A	C	A	C	0.0507	0.0233387	0.4982	0.494238	Bladder cancer	0.0515732	0.650883	GCST90274775	8	91776995	0.0113	7.23e-06	8_91776995_A_C	14285	CUB domain-containing protein 1 levels	0.00140743	0.00128523	18.3805	42.6787	20.1307
rs17078000	A	G	A	G	0.0609	0.121794	0.7179	0.70007	Bladder cancer	0.0576753	0.03471	GCST90274775	13	84915900	0.0128	1.96e-06	13_84915900_A_G	14286	CUB domain-containing protein 1 levels	0.00158226	0.00150221	21.4899	42.6787	22.6368
rs17607930	A	G	A	G	0.1654	0.233186	0.9669	0.968368	Bladder cancer	0.147675	0.114324	GCST90274775	12	60829749	0.037	7.81e-06	12_60829749_A_G	14286	CUB domain-containing protein 1 levels	0.00139705	0.0017511	25.0566	42.6787	19.9833
rs2276862	C	G	C	G	0.303	-0.0182988	0.8212	0.830528	Bladder cancer	0.0684116	0.789099	GCST90274775	3	45187785	0.0146	1.14e-95	3_45187785_C_G	14730	CUB domain-containing protein 1 levels	0.028413	0.0269607	408.08	42.6787	430.705
rs2742145	A	G	A	G	0.2325	0.0651432	0.0213	0.016098	Bladder cancer	0.204892	0.750531	GCST90274775	21	37270018	0.051	5.14e-06	21_37270018_A_G	11538	CUB domain-containing protein 1 levels	0.00179833	0.00225375	26.0579	42.6787	20.7829
rs28535751	T	C	T	C	-0.0541	-0.0202394	0.6294	0.641135	Bladder cancer	0.053427	0.704819	GCST90274775	14	59010649	0.0118	4.55e-06	14_59010649_T_C	14733	CUB domain-containing protein 1 levels	0.00142488	0.00136539	20.1411	42.6787	21.0199
rs2990246	C	G	C	G	-0.0566	-0.0269548	0.4028	0.376451	Bladder cancer	0.0536438	0.615332	GCST90274775	1	155197602	0.012	2.4e-06	1_155197602_C_G	14286	CUB domain-containing protein 1 levels	0.00155505	0.00154125	22.0491	42.6787	22.2469
rs34027772	T	C	T	C	0.0757	-0.0338864	0.2607	0.255787	Bladder cancer	0.0595632	0.569414	GCST90274775	3	43423959	0.0143	1.2e-07	3_43423959_T_C	12403	CUB domain-containing protein 1 levels	0.00225467	0.00220894	27.4537	42.6787	28.0233
rs35176543	T	G	T	G	0.0894	0.00358816	0.0924	0.0817073	Bladder cancer	0.0939983	0.96955	GCST90274775	11	17556914	0.0201	8.68e-06	11_17556914_T_G	14286	CUB domain-containing protein 1 levels	0.00138303	0.00134051	19.1736	42.6787	19.7826
rs35478654	T	C	T	C	-0.148	0.0771681	0.0367	0.0343298	Bladder cancer	0.140973	0.584106	GCST90274775	3	58453757	0.0312	2.1e-06	3_58453757_T_C	14725	CUB domain-containing protein 1 levels	0.001526	0.00154875	22.8376	42.6787	22.5016
rs4804148	T	C	T	C	-0.0619	-0.0363283	0.7187	0.740244	Bladder cancer	0.0586054	0.535337	GCST90274775	19	11270867	0.0125	7.35e-07	19_11270867_T_C	14734	CUB domain-containing protein 1 levels	0.00166179	0.00154928	22.8593	42.6787	24.5223
rs544425471	C	G	C	G	0.3879	-0.300927	0.9894	0.998964	Bladder cancer	0.809152	0.709964	GCST90274775	16	46462357	0.084	3.88e-06	16_46462357_C_G	8827	CUB domain-containing protein 1 levels	0.00241056	0.00315607	27.9405	42.6787	21.3246
rs573808300	A	G	A	G	-0.2998	-0.487167	0.0121	0.0126486	Bladder cancer	0.22913	0.0334896	GCST90274775	7	89774204	0.0599	5.59e-07	7_89774204_A_G	11718	CUB domain-containing protein 1 levels	0.00213355	0.00214878	25.2293	42.6787	25.0501
rs59752567	T	G	T	G	-0.0923	0.0575029	0.0938	0.0829005	Bladder cancer	0.0941551	0.541381	GCST90274775	15	58791416	0.0204	6.05e-06	15_58791416_T_G	14730	CUB domain-containing protein 1 levels	0.00138802	0.00144831	21.3616	42.6787	20.4712
rs59872649	A	G	A	G	-0.1093	-0.00833191	0.0652	0.0562823	Bladder cancer	0.111516	0.940441	GCST90274775	2	148430383	0.0232	2.46e-06	2_148430383_A_G	14734	CUB domain-containing protein 1 levels	0.00150435	0.00145625	21.4848	42.6787	22.1955
rs61782461	T	C	T	C	-0.2176	-0.0292725	0.9829	0.98106	Bladder cancer	0.187544	0.875967	GCST90274775	1	101804329	0.0471	3.84e-06	1_101804329_T_C	14286	CUB domain-containing protein 1 levels	0.00149203	0.00159167	22.7717	42.6787	21.344
rs6452820	A	G	A	G	-0.0738	-0.0152191	0.8367	0.856248	Bladder cancer	0.073353	0.835637	GCST90274775	5	72411335	0.0159	3.46e-06	5_72411335_A_G	14286	CUB domain-containing protein 1 levels	0.00150596	0.00148833	21.291	42.6787	21.5436
rs672806	A	G	A	G	0.0816	-0.0799233	0.4097	0.410788	Bladder cancer	0.0526585	0.129073	GCST90274775	11	126188405	0.0116	2e-12	11_126188405_A_G	14286	CUB domain-containing protein 1 levels	0.00345233	0.00322069	46.153	42.6787	49.4839
rs6991332	T	C	T	C	-0.0579	-0.0199503	0.6455	0.660468	Bladder cancer	0.0543073	0.713352	GCST90274775	8	61937553	0.0119	1.14e-06	8_61937553_T_C	14286	CUB domain-containing protein 1 levels	0.0016546	0.00153426	21.9491	42.6787	23.6735
rs74811341	T	C	T	C	-0.1323	-0.0429488	0.0513	0.0473871	Bladder cancer	0.121044	0.722725	GCST90274775	17	38720826	0.0277	1.79e-06	17_38720826_T_C	14734	CUB domain-containing protein 1 levels	0.00154606	0.00170371	25.1419	42.6787	22.8118
rs7506429	A	C	A	C	0.0737	0.0520491	0.7965	0.786957	Bladder cancer	0.0632244	0.410369	GCST90274775	18	19991319	0.0144	3.09e-07	18_19991319_A_C	14286	CUB domain-containing protein 1 levels	0.00183048	0.00176082	25.1959	42.6787	26.1945
rs75892552	T	G	T	G	-0.1259	0.180784	0.0544	0.0453204	Bladder cancer	0.124265	0.145719	GCST90274775	17	36021431	0.0279	6.41e-06	17_36021431_T_G	14286	CUB domain-containing protein 1 levels	0.00142356	0.00163075	23.3317	42.6787	20.3631
rs7618923	T	C	T	C	-0.1738	-0.0860024	0.1811	0.183996	Bladder cancer	0.0674414	0.202233	GCST90274775	3	45130725	0.0151	1.18e-30	3_45130725_T_C	14286	CUB domain-containing protein 1 levels	0.00918938	0.0089594	129.133	42.6787	132.479
rs10042665	C	G	C	G	0.0583	0.103343	0.3043	0.274999	Bladder cancer	0.0579919	0.0747463	GCST90274776	5	78775099	0.0122	1.76e-06	5_78775099_C_G	14727	Macrophage colony-stimulating factor 1 levels	0.00154842	0.0014391	21.2213	42.6787	22.8359
rs115370595	A	G	A	G	-0.2277	0.185042	0.9815	0.98373	Bladder cancer	0.203876	0.364078	GCST90274776	2	140484970	0.0496	4.42e-06	2_140484970_A_G	13799	Macrophage colony-stimulating factor 1 levels	0.00152516	0.00188286	26.0268	42.6787	21.0748
rs116039112	A	G	A	G	0.2238	-0.208313	0.016	0.0125114	Bladder cancer	0.232289	0.369835	GCST90274776	4	154438727	0.0504	8.98e-06	4_154438727_A_G	14286	Macrophage colony-stimulating factor 1 levels	0.00137851	0.00157712	22.5632	42.6787	19.7178
rs116443177	T	C	T	C	0.0827	-0.0318255	0.1595	0.14038	Bladder cancer	0.0750947	0.671708	GCST90274776	2	27764122	0.0173	1.75e-06	2_27764122_T_C	12403	Macrophage colony-stimulating factor 1 levels	0.00183934	0.00183375	22.7821	42.6787	22.8517
rs11685487	T	C	T	C	0.0944	-0.0171812	0.1197	0.10049	Bladder cancer	0.0861569	0.841936	GCST90274776	2	8775320	0.0196	1.46e-06	2_8775320_T_C	14286	Macrophage colony-stimulating factor 1 levels	0.00162135	0.00187801	26.876	42.6787	23.197
rs117591817	C	G	C	G	-0.1989	-0.0557408	0.0348	0.018212	Bladder cancer	0.19293	0.772645	GCST90274776	19	58875573	0.0435	4.82e-06	19_58875573_C_G	14286	Macrophage colony-stimulating factor 1 levels	0.00146152	0.00265764	38.0629	42.6787	20.907
rs11806838	T	C	T	C	0.0674	0.0839965	0.185	0.188066	Bladder cancer	0.0662917	0.205128	GCST90274776	1	190519358	0.0152	9.24e-06	1_190519358_T_C	14286	Macrophage colony-stimulating factor 1 levels	0.00137463	0.00136987	19.5941	42.6787	19.6622
rs12549430	A	G	A	G	-0.061	-0.00173345	0.738	0.733142	Bladder cancer	0.0585651	0.976387	GCST90274776	8	80715263	0.0135	6.23e-06	8_80715263_A_G	14286	Macrophage colony-stimulating factor 1 levels	0.00142732	0.00143896	20.5837	42.6787	20.417
rs142421172	A	G	A	G	0.1439	0.0384214	0.044	0.0367818	Bladder cancer	0.137178	0.779413	GCST90274776	1	179682087	0.031	3.45e-06	1_179682087_A_G	12840	Macrophage colony-stimulating factor 1 levels	0.00167561	0.00174206	22.4035	42.6787	21.5476
rs1605333	C	G	C	G	-0.0601	0.0748248	0.6484	0.659277	Bladder cancer	0.0543177	0.168345	GCST90274776	12	58388232	0.0124	1.25e-06	12_58388232_C_G	13237	Macrophage colony-stimulating factor 1 levels	0.00177179	0.00164691	21.8329	42.6787	23.4912
rs17610659	T	C	T	C	0.1684	-0.0169864	0.4821	0.479151	Bladder cancer	0.0521483	0.744627	GCST90274776	1	110503296	0.0118	3.31e-46	1_110503296_T_C	14286	Macrophage colony-stimulating factor 1 levels	0.0140579	0.0141611	205.183	42.6787	203.667
rs17638424	A	T	A	T	0.1034	-0.0703695	0.9329	0.934123	Bladder cancer	0.103757	0.497636	GCST90274776	18	3048453	0.023	6.94e-06	18_3048453_A_T	14715	Macrophage colony-stimulating factor 1 levels	0.00137179	0.00133853	19.7202	42.6787	20.2109
rs17734417	T	C	T	C	-0.1225	0.0788565	0.9466	0.953558	Bladder cancer	0.121793	0.517332	GCST90274776	14	58461604	0.0265	3.79e-06	14_58461604_T_C	14723	Macrophage colony-stimulating factor 1 levels	0.00144948	0.00151709	22.3669	42.6787	21.3688
rs2523992	T	G	T	G	-0.075	0.0420242	0.8323	0.824818	Bladder cancer	0.0678258	0.535527	GCST90274776	6	30075103	0.0152	8.05e-07	6_30075103_T_G	14734	Macrophage colony-stimulating factor 1 levels	0.0016499	0.00157024	23.1691	42.6787	24.3464
rs28673875	A	T	A	T	-0.2096	-0.00766987	0.9801	0.982874	Bladder cancer	0.198774	0.969221	GCST90274776	15	45690795	0.046	5.2e-06	15_45690795_A_T	14236	Macrophage colony-stimulating factor 1 levels	0.00145649	0.00171371	24.4347	42.6787	20.7619
rs34674345	T	C	T	C	-0.2243	0.0510129	0.9814	0.987256	Bladder cancer	0.231786	0.825804	GCST90274776	15	63787216	0.0503	8.22e-06	15_63787216_T_C	14286	Macrophage colony-stimulating factor 1 levels	0.00139017	0.00183674	26.2843	42.6787	19.8849
rs3934571	T	C	T	C	-0.0802	0.274265	0.1143	0.101431	Bladder cancer	0.0861187	0.00144888	GCST90274776	5	174229899	0.018	8.37e-06	5_174229899_T_C	14732	Macrophage colony-stimulating factor 1 levels	0.00134591	0.0013023	19.2079	42.6787	19.852
rs563284470	A	G	A	G	0.2087	0.114997	0.9696	0.966812	Bladder cancer	0.143503	0.422926	GCST90274776	3	47239457	0.0385	5.93e-08	3_47239457_A_G	11720	Macrophage colony-stimulating factor 1 levels	0.0025014	0.00256768	30.1655	42.6787	29.3848
rs7227917	A	G	A	G	-0.0872	0.0279029	0.8823	0.894001	Bladder cancer	0.0834831	0.738203	GCST90274776	18	45546185	0.0185	2.43e-06	18_45546185_A_G	14286	Macrophage colony-stimulating factor 1 levels	0.00155298	0.00157927	22.5939	42.6787	22.2172
rs72783071	T	C	T	C	-0.199	0.0515993	0.0231	0.0218945	Bladder cancer	0.175586	0.768858	GCST90274776	16	60437963	0.0414	1.53e-06	16_60437963_T_C	14247	Macrophage colony-stimulating factor 1 levels	0.00161934	0.0017873	25.5057	42.6787	23.105
rs74849049	T	G	T	G	-0.0914	-0.115404	0.8992	0.905933	Bladder cancer	0.0885449	0.19246	GCST90274776	3	171430935	0.02	4.88e-06	3_171430935_T_G	14286	Macrophage colony-stimulating factor 1 levels	0.00145998	0.00151439	21.6644	42.6787	20.8849
rs75305583	T	C	T	C	-0.1493	0.151089	0.0382	0.0391826	Bladder cancer	0.133803	0.258817	GCST90274776	4	183461339	0.0329	5.68e-06	4_183461339_T_C	14286	Macrophage colony-stimulating factor 1 levels	0.00143964	0.00163794	23.4347	42.6787	20.5934
rs7538029	A	C	A	C	0.0775	0.0443797	0.2211	0.195888	Bladder cancer	0.0649387	0.494349	GCST90274776	1	110474695	0.0165	2.64e-06	1_110474695_A_C	11335	Macrophage colony-stimulating factor 1 levels	0.00194288	0.00206873	23.4935	42.6787	22.0615
rs75869070	A	G	A	G	0.1151	-0.106545	0.936	0.941205	Bladder cancer	0.109679	0.331339	GCST90274776	14	78693608	0.0239	1.47e-06	14_78693608_A_G	14715	Macrophage colony-stimulating factor 1 levels	0.00157387	0.00158722	23.3899	42.6787	23.1929
rs76421506	A	G	A	G	0.0778	-0.0723732	0.853	0.848219	Bladder cancer	0.0716734	0.312609	GCST90274776	3	115295680	0.0168	3.64e-06	3_115295680_A_G	14286	Macrophage colony-stimulating factor 1 levels	0.00149913	0.00151794	21.7153	42.6787	21.4457
rs7825914	A	G	A	G	0.054	-0.00220655	0.3028	0.309635	Bladder cancer	0.0557635	0.968436	GCST90274776	8	19590012	0.0122	9.59e-06	8_19590012_A_G	14732	Macrophage colony-stimulating factor 1 levels	0.00132828	0.00123121	18.158	42.6787	19.5915
rs78652121	C	G	C	G	-0.1189	-0.266292	0.0697	0.0507878	Bladder cancer	0.117625	0.0235794	GCST90274776	4	13713646	0.026	4.81e-06	4_13713646_C_G	12838	Macrophage colony-stimulating factor 1 levels	0.0016266	0.00183337	23.5763	42.6787	20.913
rs846654	T	C	T	C	-0.0519	0.0634006	0.5786	0.601466	Bladder cancer	0.052779	0.229656	GCST90274776	2	10646611	0.0114	5.3e-06	2_10646611_T_C	14707	Macrophage colony-stimulating factor 1 levels	0.0014075	0.00131352	19.3408	42.6787	20.7265
rs10479093	A	G	A	G	-0.0565	0.0653745	0.587	0.594467	Bladder cancer	0.0523443	0.21169	GCST90274777	5	134508559	0.0116	1.11e-06	5_134508559_A_G	14712	Cystatin D levels	0.00161016	0.0015478	22.8034	42.6787	23.7236
rs11054089	T	G	T	G	0.1707	-0.0781709	0.7422	0.745925	Bladder cancer	0.0589765	0.185019	GCST90274777	12	11116082	0.0133	1.05e-37	12_11116082_T_G	14288	Cystatin D levels	0.0113992	0.0111507	161.095	42.6787	164.727
rs112961631	T	C	T	C	0.5656	0.1928	0.0233	0.0106486	Bladder cancer	0.252738	0.445555	GCST90274777	20	23929099	0.0476	1.46e-32	20_23929099_T_C	12148	Cystatin D levels	0.0114909	0.0145602	179.461	42.6787	141.19
rs117068418	T	C	T	C	0.1632	0.0930368	0.961	0.967803	Bladder cancer	0.145067	0.521304	GCST90274777	20	24176153	0.0311	1.54e-07	20_24176153_T_C	14716	Cystatin D levels	0.001868	0.00199645	29.4345	42.6787	27.5372
rs141192864	T	C	T	C	0.1016	-0.206691	0.0812	0.0655685	Bladder cancer	0.104224	0.0473523	GCST90274777	12	31381343	0.0213	1.84e-06	12_31381343_T_C	14728	Cystatin D levels	0.00154267	0.00154026	22.7169	42.6787	22.7525
rs1509659	A	G	A	G	-0.0671	-0.0168213	0.6342	0.600885	Bladder cancer	0.0524576	0.748465	GCST90274777	11	34865133	0.0118	1.3e-08	11_34865133_A_G	14732	Cystatin D levels	0.00219041	0.00208903	30.8359	42.6787	32.3356
rs35106244	T	C	T	C	0.0831	-0.153402	0.4156	0.456756	Bladder cancer	0.0540825	0.00456189	GCST90274777	19	49203829	0.0123	1.42e-11	19_49203829_T_C	14288	Cystatin D levels	0.0031849	0.00335442	48.0826	42.6787	45.6449
rs470841	T	C	T	C	0.0568	0.0316461	0.6369	0.619849	Bladder cancer	0.0529296	0.549912	GCST90274777	18	24286681	0.0119	1.81e-06	18_24286681_T_C	14736	Cystatin D levels	0.00154387	0.00149219	22.0188	42.6787	22.7826
rs4950836	A	G	A	G	0.0585	-0.0504038	0.6022	0.584536	Bladder cancer	0.0523948	0.336049	GCST90274777	1	202192624	0.012	1.09e-06	1_202192624_A_G	14288	Cystatin D levels	0.0016608	0.00163963	23.4623	42.6787	23.7656
rs60586299	T	C	T	C	-0.0654	-0.0213658	0.3077	0.28917	Bladder cancer	0.0590688	0.717569	GCST90274777	18	3479423	0.0134	1.06e-06	18_3479423_T_C	14288	Cystatin D levels	0.00166461	0.00182225	26.0801	42.6787	23.8202
rs6106715	C	G	C	G	-0.3784	0.0229622	0.6593	0.673576	Bladder cancer	0.0546828	0.674546	GCST90274777	20	23770266	0.0118	1.24e-225	20_23770266_C_G	14726	Cystatin D levels	0.0652819	0.0643261	1012.25	42.6787	1028.34
rs72748935	T	C	T	C	0.0772	0.0327772	0.4618	0.446989	Bladder cancer	0.0516583	0.525754	GCST90274777	15	63639416	0.0114	1.27e-11	15_63639416_T_C	14722	Cystatin D levels	0.00310575	0.00296253	43.738	42.6787	45.859
rs7275493	T	C	T	C	-0.0572	-0.0802953	0.6243	0.65031	Bladder cancer	0.0539797	0.13688	GCST90274777	21	18049996	0.0119	1.53e-06	21_18049996_T_C	14727	Cystatin D levels	0.00156661	0.00153482	22.6349	42.6787	23.1046
rs72980022	A	G	A	G	0.0607	0.00893402	0.2813	0.279748	Bladder cancer	0.0572069	0.875899	GCST90274777	2	233853187	0.0126	1.45e-06	2_233853187_A_G	14721	Cystatin D levels	0.00157425	0.00148979	21.9609	42.6787	23.2079
rs77415137	A	G	A	G	-0.2494	0.0341401	0.9789	0.976438	Bladder cancer	0.16809	0.839052	GCST90274777	20	24084648	0.0438	1.24e-08	20_24084648_A_G	14736	Cystatin D levels	0.00219568	0.00256947	37.9561	42.6787	32.4224
rs7943316	A	T	A	T	-0.0639	-0.00607085	0.345	0.328545	Bladder cancer	0.0545718	0.911422	GCST90274777	11	34460472	0.012	1.01e-07	11_34460472_A_T	14731	Cystatin D levels	0.00192146	0.00184541	27.2312	42.6787	28.3556
rs10778675	A	C	A	C	0.0792	0.00726009	0.1687	0.167591	Bladder cancer	0.0688196	0.915983	GCST90274778	12	79905558	0.0158	5.37e-07	12_79905558_A_C	14295	Fractalkine levels	0.00175489	0.00175935	25.1908	42.6787	25.1267
rs111472651	C	G	C	G	-0.1191	0.0602914	0.9355	0.944783	Bladder cancer	0.113376	0.594877	GCST90274778	2	44117788	0.0248	1.57e-06	2_44117788_C_G	14728	Fractalkine levels	0.00156371	0.00171182	25.2514	42.6787	23.0632
rs114359340	A	G	A	G	-0.1881	0.258242	0.9747	0.975728	Bladder cancer	0.166678	0.121299	GCST90274778	1	6532317	0.0405	3.41e-06	1_6532317_A_G	13651	Fractalkine levels	0.00157791	0.00174501	23.8593	42.6787	21.5709
rs11682107	A	G	A	G	-0.0675	0.0176293	0.5568	0.562617	Bladder cancer	0.0527993	0.738461	GCST90274778	2	113835522	0.0126	8.45e-08	2_113835522_A_G	12412	Fractalkine levels	0.00230723	0.00224873	27.9696	42.6787	28.699
rs117698194	A	G	A	G	-0.1996	0.301338	0.0224	0.0218297	Bladder cancer	0.176032	0.0869268	GCST90274778	15	85657494	0.0432	3.83e-06	15_85657494_A_G	13859	Fractalkine levels	0.00153821	0.00174486	24.2208	42.6787	21.3478
rs12331618	A	G	A	G	-0.0582	0.0447061	0.4914	0.48777	Bladder cancer	0.051438	0.384778	GCST90274778	4	187139939	0.0114	3.3e-07	4_187139939_A_G	14729	Fractalkine levels	0.00176666	0.00169312	24.9769	42.6787	26.0637
rs13167439	T	C	T	C	-0.0903	0.0741775	0.89	0.906896	Bladder cancer	0.0889321	0.40423	GCST90274778	5	120396066	0.0193	2.89e-06	5_120396066_T_C	14295	Fractalkine levels	0.00152923	0.00159657	22.8563	42.6787	21.8908
rs16904321	A	G	A	G	-0.0867	0.0349613	0.8632	0.896626	Bladder cancer	0.0854923	0.682583	GCST90274778	8	131635787	0.0193	7.05e-06	8_131635787_A_G	14295	Fractalkine levels	0.0014099	0.00177527	25.4191	42.6787	20.1801
rs1976172	C	G	C	G	-0.0569	-0.0358985	0.3525	0.343844	Bladder cancer	0.054514	0.510205	GCST90274778	3	1260482	0.012	2.12e-06	3_1260482_C_G	14732	Fractalkine levels	0.00152404	0.00147793	21.8021	42.6787	22.4834
rs2442752	T	C	T	C	-0.0589	0.0593615	0.6177	0.576095	Bladder cancer	0.0519312	0.253005	GCST90274778	6	31351764	0.0117	4.8e-07	6_31351764_T_C	14743	Fractalkine levels	0.00171627	0.00163849	24.1925	42.6787	25.343
rs2731674	T	G	T	G	-0.0681	0.0757325	0.274	0.25424	Bladder cancer	0.0589542	0.198932	GCST90274778	5	176839890	0.0128	1.04e-07	5_176839890_T_G	14740	Fractalkine levels	0.00191691	0.00184506	27.2428	42.6787	28.3057
rs35026817	T	G	T	G	0.0633	-0.0296965	0.3327	0.325091	Bladder cancer	0.0551775	0.590439	GCST90274778	3	70136592	0.0122	2.12e-07	3_70136592_T_G	14740	Fractalkine levels	0.00182329	0.00177914	26.2678	42.6787	26.9208
rs36067349	T	C	T	C	0.0666	-0.0118234	0.8038	0.809865	Bladder cancer	0.0657498	0.857291	GCST90274778	15	23001299	0.015	9e-06	15_23001299_T_C	14294	Fractalkine levels	0.00137744	0.00139902	20.0229	42.6787	19.7136
rs3732378	A	G	A	G	0.0941	0.0122351	0.1671	0.173531	Bladder cancer	0.0676758	0.856532	GCST90274778	3	39307162	0.0154	9.94e-10	3_39307162_A_G	14740	Fractalkine levels	0.00252697	0.00246478	36.4157	42.6787	37.3369
rs4642601	A	G	A	G	0.0855	0.067709	0.8528	0.871529	Bladder cancer	0.0797849	0.396079	GCST90274778	8	11392732	0.0193	9.42e-06	8_11392732_A_G	10894	Fractalkine levels	0.00179857	0.00183534	20.0273	42.6787	19.6254
rs530057572	T	G	T	G	-0.2257	-0.0638686	0.979	0.990478	Bladder cancer	0.26783	0.811519	GCST90274778	14	85801666	0.0491	4.29e-06	14_85801666_T_G	12127	Fractalkine levels	0.00173965	0.00209457	25.45	42.6787	21.13
rs543554558	C	G	C	G	-0.2883	0.00733292	0.9837	0.993348	Bladder cancer	0.316838	0.981535	GCST90274778	19	19437687	0.0633	5.25e-06	19_19437687_C_G	11091	Fractalkine levels	0.00186714	0.00266544	29.6361	42.6787	20.7435
rs55896747	T	C	T	C	0.1129	0.0794298	0.9372	0.936622	Bladder cancer	0.105849	0.45301	GCST90274778	16	57508595	0.0244	3.71e-06	16_57508595_T_C	14734	Fractalkine levels	0.00145116	0.00150041	22.1372	42.6787	21.4096
rs56397903	A	G	A	G	0.1968	-0.487407	0.9744	0.982723	Bladder cancer	0.196807	0.0132651	GCST90274778	8	26741279	0.0424	3.46e-06	8_26741279_A_G	14743	Fractalkine levels	0.00145934	0.00193222	28.5381	42.6787	21.5436
rs56675723	T	C	T	C	0.0666	0.0180415	0.7791	0.772444	Bladder cancer	0.0613327	0.768638	GCST90274778	11	120941125	0.0149	7.83e-06	11_120941125_T_C	12412	Fractalkine levels	0.00160733	0.00152675	18.9759	42.6787	19.9791
rs571946532	A	C	A	C	-0.2404	-0.05892	0.981	0.983215	Bladder cancer	0.199962	0.768257	GCST90274778	9	88885541	0.0512	2.66e-06	9_88885541_A_C	11768	Fractalkine levels	0.0018702	0.00215438	25.4031	42.6787	22.046
rs635634	T	C	T	C	-0.1145	0.0809805	0.1884	0.184394	Bladder cancer	0.0667465	0.225033	GCST90274778	9	136155000	0.0166	5.29e-12	9_136155000_T_C	11792	Fractalkine levels	0.00401913	0.00400926	47.4594	42.6787	47.5768
rs6937696	T	C	T	C	-0.0811	0.0116626	0.651	0.659182	Bladder cancer	0.0538632	0.82858	GCST90274778	6	32418018	0.012	1.4e-11	6_32418018_T_C	14742	Fractalkine levels	0.00308914	0.00298867	44.1851	42.6787	45.6751
rs712137	A	C	A	C	0.0563	0.0416021	0.6601	0.643285	Bladder cancer	0.0538261	0.439583	GCST90274778	12	41381284	0.012	2.71e-06	12_41381284_A_C	14737	Fractalkine levels	0.00149161	0.00142235	20.9882	42.6787	22.0117
rs71451021	A	C	A	C	-0.165	-0.0382495	0.9728	0.975372	Bladder cancer	0.165596	0.81733	GCST90274778	2	19059082	0.0362	5.16e-06	2_19059082_A_C	14740	Fractalkine levels	0.00140767	0.00144076	21.2645	42.6787	20.7755
rs72704449	T	C	T	C	-0.1358	0.0344582	0.9547	0.959571	Bladder cancer	0.130262	0.791371	GCST90274778	1	179473273	0.0298	5.19e-06	1_179473273_T_C	14295	Fractalkine levels	0.00145082	0.00159512	22.8355	42.6787	20.7667
rs73007244	T	C	T	C	0.0813	-0.0762257	0.1321	0.118336	Bladder cancer	0.0801969	0.341868	GCST90274778	18	59374764	0.0179	5.57e-06	18_59374764_T_C	14295	Fractalkine levels	0.0014412	0.0015156	21.6953	42.6787	20.6289
rs73137770	C	G	C	G	0.2442	-0.468013	0.9812	0.99133	Bladder cancer	0.278751	0.0931595	GCST90274778	20	52569781	0.0529	3.91e-06	20_52569781_C_G	13808	Fractalkine levels	0.00154114	0.00220007	30.4412	42.6787	21.3098
rs77819349	C	G	C	G	0.1196	-0.153774	0.9371	0.939846	Bladder cancer	0.108769	0.157431	GCST90274778	9	81886673	0.0263	5.43e-06	9_81886673_C_G	14295	Fractalkine levels	0.00144477	0.00168628	24.1427	42.6787	20.68
rs77915710	A	G	A	G	-0.1436	0.0858645	0.0402	0.0408312	Bladder cancer	0.130206	0.509607	GCST90274778	1	172099857	0.0304	2.32e-06	1_172099857_A_G	14742	Fractalkine levels	0.0015115	0.00159128	23.4928	42.6787	22.3132
rs78751841	A	G	A	G	-0.1935	0.129348	0.9764	0.971105	Bladder cancer	0.152218	0.395461	GCST90274778	16	57183274	0.0433	7.87e-06	16_57183274_A_G	14723	Fractalkine levels	0.00135475	0.00172557	25.446	42.6787	19.9704
rs8052631	A	G	A	G	-0.1511	-0.231919	0.9463	0.953241	Bladder cancer	0.121799	0.0568963	GCST90274778	16	57167230	0.027	2.19e-08	16_57167230_A_G	14295	Fractalkine levels	0.00218639	0.0023204	33.2426	42.6787	31.3185
rs980364	A	G	A	G	0.1479	0.0991663	0.9343	0.944844	Bladder cancer	0.112433	0.377776	GCST90274778	4	179539497	0.0301	8.94e-07	4_179539497_A_G	9902	Fractalkine levels	0.00243282	0.00268546	26.6576	42.6787	24.1437
rs9981489	T	C	T	C	0.1127	0.0744685	0.0652	0.0516093	Bladder cancer	0.11698	0.52439	GCST90274778	21	25498266	0.0254	9.12e-06	21_25498266_T_C	14295	Fractalkine levels	0.0013755	0.00154826	22.1636	42.6787	19.687
rs10508556	T	C	T	C	0.0518	-0.116947	0.4633	0.456948	Bladder cancer	0.0515566	0.0233091	GCST90274779	10	18285342	0.0116	7.99e-06	10_18285342_T_C	14735	C-X-C motif chemokine 1 levels	0.00135165	0.00133439	19.6859	42.6787	19.9408
rs10734292	A	G	A	G	0.123	-0.00472245	0.067	0.0626937	Bladder cancer	0.106101	0.964499	GCST90274779	11	20486401	0.0267	4.09e-06	11_20486401_A_G	11776	C-X-C motif chemokine 1 levels	0.00179921	0.00189146	22.3122	42.6787	21.2221
rs118090102	T	G	T	G	-0.2573	-0.22691	0.0166	0.00860848	Bladder cancer	0.280631	0.418763	GCST90274779	12	28799395	0.0582	9.83e-06	12_28799395_T_G	12935	C-X-C motif chemokine 1 levels	0.00150896	0.00216146	28.0148	42.6787	19.5449
rs11880837	A	G	A	G	0.0583	0.0303901	0.3161	0.294874	Bladder cancer	0.0563879	0.589924	GCST90274779	19	14808453	0.0127	4.42e-06	19_14808453_A_G	14288	C-X-C motif chemokine 1 levels	0.00147292	0.00146955	21.0249	42.6787	21.0732
rs12770839	A	C	A	C	0.0648	-0.0532586	0.321	0.324373	Bladder cancer	0.055593	0.338058	GCST90274779	10	65297720	0.0126	2.71e-07	10_65297720_A_C	14724	C-X-C motif chemokine 1 levels	0.00179334	0.00183044	26.9971	42.6787	26.449
rs1366946	T	C	T	C	-0.3134	0.0934181	0.7638	0.786563	Bladder cancer	0.0629699	0.137932	GCST90274779	4	74738469	0.0134	5.65e-121	4_74738469_T_C	14730	C-X-C motif chemokine 1 levels	0.0358102	0.0354395	541.13	42.6787	547.001
rs141276323	C	G	C	G	0.1982	-0.0428836	0.0196	0.020281	Bladder cancer	0.184011	0.815724	GCST90274779	12	90180208	0.0444	8.05e-06	12_90180208_C_G	14728	C-X-C motif chemokine 1 levels	0.00135135	0.00150972	22.2658	42.6787	19.927
rs144620567	T	C	T	C	0.1891	0.267877	0.9761	0.978692	Bladder cancer	0.180354	0.137468	GCST90274779	7	115483444	0.0426	9.04e-06	7_115483444_T_C	14730	C-X-C motif chemokine 1 levels	0.0013361	0.00166842	24.6135	42.6787	19.7044
rs144747179	T	C	T	C	0.2626	-0.294997	0.0157	0.0122703	Bladder cancer	0.23391	0.207253	GCST90274779	5	159394723	0.0582	6.42e-06	5_159394723_T_C	12591	C-X-C motif chemokine 1 levels	0.00161455	0.00213131	26.8884	42.6787	20.3584
rs146204850	T	C	T	C	0.2706	0.0554651	0.0138	0.00705518	Bladder cancer	0.310684	0.85831	GCST90274779	10	13896867	0.0601	6.72e-06	10_13896867_T_C	13801	C-X-C motif chemokine 1 levels	0.00146697	0.0019931	27.5577	42.6787	20.2725
rs150441545	A	C	A	C	-0.0719	0.0687127	0.8268	0.820092	Bladder cancer	0.0668884	0.304291	GCST90274779	14	35091527	0.0158	5.35e-06	14_35091527_A_C	14288	C-X-C motif chemokine 1 levels	0.00144745	0.00148059	21.1831	42.6787	20.7083
rs2122155	A	G	A	G	-0.0538	0.00501706	0.5637	0.578896	Bladder cancer	0.0521009	0.923286	GCST90274779	4	59689961	0.0117	4.26e-06	4_59689961_A_G	14717	C-X-C motif chemokine 1 levels	0.00143486	0.00142373	20.9801	42.6787	21.1443
rs2280441	A	G	A	G	-0.1443	0.00721989	0.0405	0.0260682	Bladder cancer	0.161706	0.964388	GCST90274779	15	81240669	0.0312	3.75e-06	15_81240669_A_G	14735	C-X-C motif chemokine 1 levels	0.00144978	0.00161831	23.8813	42.6787	21.3906
rs2835916	C	G	C	G	-0.0564	0.078369	0.3876	0.396545	Bladder cancer	0.0529297	0.138706	GCST90274779	21	39102421	0.012	2.6e-06	21_39102421_C_G	14735	C-X-C motif chemokine 1 levels	0.00149711	0.00151011	22.282	42.6787	22.09
rs374636704	T	G	T	G	0.3935	0.0136744	0.009	0.0077622	Bladder cancer	0.292772	0.962747	GCST90274779	5	177372616	0.0869	5.95e-06	5_177372616_T_G	8911	C-X-C motif chemokine 1 levels	0.00229627	0.00276208	24.6755	42.6787	20.5045
rs4474574	T	C	T	C	-0.365	0.022697	0.0146	0.00585303	Bladder cancer	0.338936	0.946609	GCST90274779	13	37854253	0.0779	2.79e-06	13_37854253_T_C	9555	C-X-C motif chemokine 1 levels	0.00229284	0.00383337	36.7611	42.6787	21.9539
rs57228648	T	C	T	C	0.2036	-0.186447	0.9769	0.984207	Bladder cancer	0.208017	0.370089	GCST90274779	8	134581618	0.0452	6.66e-06	8_134581618_T_C	14735	C-X-C motif chemokine 1 levels	0.00137528	0.00187089	27.6154	42.6787	20.2898
rs573171230	A	G	A	G	0.1239	0.167649	0.0687	0.0491719	Bladder cancer	0.122688	0.171792	GCST90274779	11	117706871	0.0279	8.96e-06	11_117706871_A_G	11760	C-X-C motif chemokine 1 levels	0.00167445	0.00196435	23.1423	42.6787	19.7212
rs6700633	T	C	T	C	-0.1886	0.00956093	0.9791	0.979493	Bladder cancer	0.180677	0.957798	GCST90274779	1	211439817	0.042	7.11e-06	1_211439817_T_C	14726	C-X-C motif chemokine 1 levels	0.00136762	0.00145575	21.4657	42.6787	20.1644
rs6807587	A	G	A	G	0.0577	-0.012644	0.2947	0.284292	Bladder cancer	0.0574204	0.825715	GCST90274779	3	45270029	0.0128	6.55e-06	3_45270029_A_G	14733	C-X-C motif chemokine 1 levels	0.00137753	0.001384	20.4159	42.6787	20.3204
rs75883619	T	C	T	C	-0.2241	-0.0225867	0.9769	0.986707	Bladder cancer	0.227973	0.921078	GCST90274779	1	191712620	0.0502	8.04e-06	1_191712620_T_C	14736	C-X-C motif chemokine 1 levels	0.00135073	0.00226661	33.472	42.6787	19.9286
rs7700661	A	G	A	G	0.0556	0.0528477	0.3196	0.315421	Bladder cancer	0.0552627	0.338921	GCST90274779	5	122405522	0.0124	7.33e-06	5_122405522_A_G	14719	C-X-C motif chemokine 1 levels	0.00136425	0.00134447	19.8132	42.6787	20.1051
rs8136931	A	G	A	G	-0.1533	0.0900396	0.0337	0.0189753	Bladder cancer	0.189378	0.634467	GCST90274779	22	33031339	0.0344	8.33e-06	22_33031339_A_G	14736	C-X-C motif chemokine 1 levels	0.00134605	0.00153058	22.5861	42.6787	19.8595
rs863004	T	C	T	C	0.0661	-0.0601538	0.3809	0.393796	Bladder cancer	0.0532244	0.258395	GCST90274779	1	159176831	0.0119	2.78e-08	1_159176831_T_C	14722	C-X-C motif chemokine 1 levels	0.00209166	0.00206065	30.3954	42.6787	30.8538
rs937341	T	G	T	G	0.066	0.128386	0.7719	0.776776	Bladder cancer	0.0629985	0.0415582	GCST90274779	12	125093430	0.0146	6.17e-06	12_125093430_T_G	14288	C-X-C motif chemokine 1 levels	0.0014284	0.00153393	21.9473	42.6787	20.4354
rs10481754	T	C	T	C	-0.0548	-0.0310351	0.4567	0.454703	Bladder cancer	0.0518418	0.549407	GCST90274780	9	84196490	0.0119	4.12e-06	9_84196490_T_C	14296	C-X-C motif chemokine 10 levels	0.00148139	0.00149026	21.3336	42.6787	21.2064
rs1077965	A	G	A	G	-0.0546	0.0379858	0.5648	0.57528	Bladder cancer	0.0521876	0.466694	GCST90274780	15	80065337	0.0118	3.71e-06	15_80065337_A_G	14731	C-X-C motif chemokine 10 levels	0.0014515	0.00146554	21.6177	42.6787	21.4102
rs112202639	A	G	A	G	-0.1609	0.0637991	0.9671	0.976471	Bladder cancer	0.170793	0.708742	GCST90274780	1	44566391	0.0336	1.68e-06	1_44566391_A_G	14744	C-X-C motif chemokine 10 levels	0.00155311	0.00164744	24.3266	42.6787	22.9316
rs115140093	T	C	T	C	-0.5186	0.165602	0.9732	0.979054	Bladder cancer	0.18155	0.361685	GCST90274780	4	76910673	0.042	5.02e-35	4_76910673_T_C	14744	C-X-C motif chemokine 10 levels	0.0102363	0.0140292	209.761	42.6787	152.464
rs11645285	C	G	C	G	-0.1096	0.055896	0.9073	0.905088	Bladder cancer	0.089176	0.530787	GCST90274780	16	5063233	0.0242	5.93e-06	16_5063233_C_G	11345	C-X-C motif chemokine 10 levels	0.001805	0.00202061	22.9661	42.6787	20.5112
rs117298099	A	G	A	G	0.1456	0.165568	0.0363	0.0298604	Bladder cancer	0.150458	0.271147	GCST90274780	6	152726625	0.0325	7.46e-06	6_152726625_A_G	14725	C-X-C motif chemokine 10 levels	0.00136134	0.00148321	21.8697	42.6787	20.0704
rs11825923	T	C	T	C	0.1921	-0.0357673	0.0237	0.0152219	Bladder cancer	0.211333	0.865603	GCST90274780	11	116006514	0.0421	5.04e-06	11_116006514_T_C	14247	C-X-C motif chemokine 10 levels	0.00145947	0.00170772	24.3681	42.6787	20.8205
rs12155428	T	C	T	C	-0.1765	-0.363736	0.0284	0.0322199	Bladder cancer	0.144729	0.0119634	GCST90274780	7	3425301	0.0375	2.52e-06	7_3425301_T_C	14733	C-X-C motif chemokine 10 levels	0.00150156	0.00171919	25.3691	42.6787	22.1527
rs12174864	A	G	A	G	-0.0582	-0.0282927	0.6254	0.616155	Bladder cancer	0.0539444	0.599945	GCST90274780	6	88557407	0.0121	1.51e-06	6_88557407_A_G	14295	C-X-C motif chemokine 10 levels	0.00161603	0.00158709	22.7203	42.6787	23.1353
rs12476448	T	C	T	C	0.0536	9.64e-05	0.4864	0.485177	Bladder cancer	0.0514839	0.998507	GCST90274780	2	14400474	0.0115	3.15e-06	2_14400474_T_C	14737	C-X-C motif chemokine 10 levels	0.00147212	0.00143542	21.1813	42.6787	21.7237
rs12629593	T	G	T	G	-0.0879	-0.068769	0.1209	0.106087	Bladder cancer	0.0838222	0.41198	GCST90274780	3	54104178	0.0182	1.37e-06	3_54104178_T_G	14744	C-X-C motif chemokine 10 levels	0.00157976	0.00164237	24.2517	42.6787	23.3257
rs12646113	T	C	T	C	0.0977	-0.0177788	0.246	0.215121	Bladder cancer	0.0625811	0.77634	GCST90274780	4	77175245	0.0136	6.78e-13	4_77175245_T_C	14743	C-X-C motif chemokine 10 levels	0.00348872	0.003541	52.3833	42.6787	51.6073
rs143796249	C	G	C	G	-0.2858	0.326185	0.012	0.00708882	Bladder cancer	0.309177	0.29142	GCST90274780	9	4150061	0.062	4.03e-06	9_4150061_C_G	14296	C-X-C motif chemokine 10 levels	0.00148437	0.00193684	27.7388	42.6787	21.2491
rs150519056	T	C	T	C	-0.1841	-0.0464034	0.9688	0.982682	Bladder cancer	0.199238	0.815836	GCST90274780	22	50774821	0.0376	9.77e-07	22_50774821_T_C	13661	C-X-C motif chemokine 10 levels	0.00175207	0.00204893	28.0437	42.6787	23.9735
rs1563171	A	G	A	G	0.0592	0.0466645	0.7042	0.711987	Bladder cancer	0.0568029	0.411353	GCST90274780	2	3891773	0.0127	3.14e-06	2_3891773_A_G	14740	C-X-C motif chemokine 10 levels	0.00147217	0.00146005	21.5497	42.6787	21.7288
rs2164693	A	G	A	G	-0.1736	-0.152559	0.9625	0.986266	Bladder cancer	0.229527	0.506264	GCST90274780	2	139887164	0.0393	9.99e-06	2_139887164_A_G	14296	C-X-C motif chemokine 10 levels	0.00136323	0.00217551	31.1646	42.6787	19.5126
rs2523495	T	C	T	C	0.1095	-0.0434952	0.1048	0.141298	Bladder cancer	0.0732703	0.552762	GCST90274780	6	31377978	0.0196	2.31e-08	6_31377978_T_C	14743	C-X-C motif chemokine 10 levels	0.00211286	0.00224978	33.2388	42.6787	31.2116
rs3184504	T	C	T	C	0.1138	-0.0138586	0.4756	0.482616	Bladder cancer	0.0512994	0.787043	GCST90274780	12	111884608	0.0131	3.72e-18	12_111884608_T_C	11793	C-X-C motif chemokine 10 levels	0.00635946	0.0064598	76.6627	42.6787	75.4644
rs3846056	A	G	A	G	-0.0559	0.0712679	0.3248	0.326151	Bladder cancer	0.0548557	0.193879	GCST90274780	3	134227292	0.0124	6.54e-06	3_134227292_A_G	14296	C-X-C motif chemokine 10 levels	0.00141974	0.00137057	19.6179	42.6787	20.3226
rs4367871	T	C	T	C	-0.0567	-0.0243277	0.5587	0.586718	Bladder cancer	0.0528722	0.645428	GCST90274780	10	1845059	0.0119	1.89e-06	10_1845059_T_C	14296	C-X-C motif chemokine 10 levels	0.00158573	0.00158529	22.6961	42.6787	22.7024
rs4804148	T	C	T	C	-0.0629	-0.0363283	0.7227	0.740244	Bladder cancer	0.0586054	0.535337	GCST90274780	19	11270867	0.013	1.31e-06	19_11270867_T_C	14744	C-X-C motif chemokine 10 levels	0.00158551	0.00158577	23.4145	42.6787	23.4107
rs55732300	A	G	A	G	0.1175	-0.0296889	0.929	0.92682	Bladder cancer	0.0997033	0.765877	GCST90274780	11	73731422	0.025	2.6e-06	11_73731422_A_G	14730	C-X-C motif chemokine 10 levels	0.00149762	0.00182129	26.8729	42.6787	22.09
rs59465157	A	G	A	G	0.1295	0.0569343	0.0442	0.0437847	Bladder cancer	0.125198	0.649286	GCST90274780	5	115740808	0.0287	6.42e-06	5_115740808_A_G	14744	C-X-C motif chemokine 10 levels	0.00137918	0.00141696	20.9185	42.6787	20.3599
rs61811733	C	G	C	G	-0.1436	-0.0339566	0.9616	0.966294	Bladder cancer	0.143445	0.812872	GCST90274780	1	181143447	0.0324	9.33e-06	1_181143447_C_G	14738	C-X-C motif chemokine 10 levels	0.00133125	0.00152288	22.4753	42.6787	19.6435
rs62208309	T	C	T	C	-0.1371	0.117334	0.0542	0.0432834	Bladder cancer	0.128456	0.361022	GCST90274780	20	51942555	0.0309	9.13e-06	20_51942555_T_C	14296	C-X-C motif chemokine 10 levels	0.00137533	0.0019271	27.5991	42.6787	19.686
rs71534595	T	C	T	C	-0.2991	0.284667	0.9813	0.994468	Bladder cancer	0.347741	0.413005	GCST90274780	6	32516855	0.0606	7.99e-07	6_32516855_T_C	11719	C-X-C motif chemokine 10 levels	0.00207477	0.00328327	38.5968	42.6787	24.3606
rs72651343	T	C	T	C	-0.6096	-0.278623	0.9892	0.988131	Bladder cancer	0.237026	0.239796	GCST90274780	4	76808216	0.0619	6.98e-23	4_76808216_T_C	14257	C-X-C motif chemokine 10 levels	0.00675766	0.00794013	114.093	42.6787	96.9859
rs72682331	A	G	A	G	0.1089	0.0635549	0.0979	0.0818205	Bladder cancer	0.0942679	0.500188	GCST90274780	4	112904535	0.0209	1.88e-07	4_112904535_A_G	14731	C-X-C motif chemokine 10 levels	0.00183988	0.00209471	30.9177	42.6787	27.1496
rs741344	A	G	A	G	-0.06	-0.0602413	0.7036	0.711532	Bladder cancer	0.0579085	0.298208	GCST90274780	12	68597086	0.013	3.92e-06	12_68597086_A_G	14296	C-X-C motif chemokine 10 levels	0.00148804	0.00150154	21.4953	42.6787	21.3018
rs74956615	A	T	A	T	-0.1358	0.0348119	0.0495	0.0534332	Bladder cancer	0.115257	0.762623	GCST90274780	19	10427721	0.0294	3.86e-06	19_10427721_A_T	13671	C-X-C motif chemokine 10 levels	0.00155844	0.00173535	23.7617	42.6787	21.3356
rs76484468	T	C	T	C	-0.2168	-0.0828142	0.9792	0.976069	Bladder cancer	0.171175	0.628528	GCST90274780	2	227559824	0.0482	6.86e-06	2_227559824_T_C	14744	C-X-C motif chemokine 10 levels	0.00137048	0.00191462	28.2795	42.6787	20.2313
rs820963	C	G	C	G	-0.0539	-0.0963162	0.3617	0.393081	Bladder cancer	0.0531289	0.0698509	GCST90274780	2	57744868	0.0122	9.96e-06	2_57744868_C_G	14732	C-X-C motif chemokine 10 levels	0.00132337	0.00134147	19.7864	42.6787	19.519
rs10733789	T	C	T	C	-0.0815	0.0722374	0.6875	0.687068	Bladder cancer	0.0555687	0.193613	GCST90274781	10	64948684	0.0127	1.39e-10	10_64948684_T_C	14287	C-X-C motif chemokine 11 levels	0.0028746	0.00285409	40.8874	42.6787	41.182
rs10876335	C	G	C	G	0.0607	-0.032485	0.3069	0.286416	Bladder cancer	0.0570915	0.569357	GCST90274781	12	53150540	0.0133	5.02e-06	12_53150540_C_G	13240	C-X-C motif chemokine 11 levels	0.00157097	0.00156747	20.7828	42.6787	20.8293
rs10898158	A	G	A	G	0.0609	-0.0666559	0.6028	0.582101	Bladder cancer	0.0520909	0.200684	GCST90274781	11	83554112	0.0121	4.83e-07	11_83554112_A_G	14288	C-X-C motif chemokine 11 levels	0.00177004	0.00177602	25.4173	42.6787	25.3317
rs111787182	A	C	A	C	-0.1445	0.0933262	0.951	0.957889	Bladder cancer	0.128467	0.467556	GCST90274781	7	157911633	0.0314	4.19e-06	7_157911633_A_C	13224	C-X-C motif chemokine 11 levels	0.00159913	0.001946	25.7801	42.6787	21.1776
rs112884138	T	C	T	C	-0.0976	0.166322	0.0892	0.0964629	Bladder cancer	0.0869053	0.0556417	GCST90274781	4	134362360	0.0209	3.01e-06	4_134362360_T_C	14728	C-X-C motif chemokine 11 levels	0.0014787	0.00154781	22.8284	42.6787	21.8076
rs115344667	T	C	T	C	-0.1344	-0.00400769	0.9568	0.949267	Bladder cancer	0.1167	0.972605	GCST90274781	2	78400313	0.0302	8.57e-06	2_78400313_T_C	14736	C-X-C motif chemokine 11 levels	0.0013424	0.00149325	22.0345	42.6787	19.8054
rs116470923	T	C	T	C	-0.1975	-0.203005	0.0216	0.0252833	Bladder cancer	0.16348	0.21432	GCST90274781	4	77374393	0.0427	3.74e-06	4_77374393_T_C	14736	C-X-C motif chemokine 11 levels	0.00144987	0.00164867	24.3317	42.6787	21.3933
rs11754031	T	C	T	C	0.0542	0.0583078	0.357	0.365023	Bladder cancer	0.0542111	0.28212	GCST90274781	6	88567494	0.0122	8.89e-06	6_88567494_T_C	14288	C-X-C motif chemokine 11 levels	0.00137965	0.00134868	19.2932	42.6787	19.7369
rs12433317	A	G	A	G	0.0571	-0.0489744	0.4282	0.413935	Bladder cancer	0.0521431	0.347613	GCST90274781	14	50775476	0.012	1.95e-06	14_50775476_A_G	14288	C-X-C motif chemokine 11 levels	0.00158238	0.00159659	22.8453	42.6787	22.6417
rs12998222	T	C	T	C	0.2339	0.221252	0.9855	0.984064	Bladder cancer	0.205441	0.281498	GCST90274781	2	153497193	0.0528	9.43e-06	2_153497193_T_C	13801	C-X-C motif chemokine 11 levels	0.00142013	0.00156356	21.6094	42.6787	19.6242
rs144908342	A	G	A	G	-0.1763	0.0528594	0.0292	0.0296297	Bladder cancer	0.152314	0.72856	GCST90274781	17	71105507	0.0394	7.65e-06	17_71105507_A_G	14727	C-X-C motif chemokine 11 levels	0.0013579	0.00176217	25.9937	42.6787	20.0222
rs148828177	T	C	T	C	-0.1509	-0.28531	0.0385	0.0335227	Bladder cancer	0.142727	0.0456092	GCST90274781	2	240244812	0.034	9.07e-06	2_240244812_T_C	14732	C-X-C motif chemokine 11 levels	0.00133548	0.00168585	24.8745	42.6787	19.6979
rs17466177	T	C	T	C	-0.1822	0.0714754	0.9741	0.97325	Bladder cancer	0.159144	0.653341	GCST90274781	1	222852472	0.0409	8.4e-06	1_222852472_T_C	14723	C-X-C motif chemokine 11 levels	0.00134626	0.00167506	24.6999	42.6787	19.845
rs17824652	T	C	T	C	0.1168	0.0206309	0.9406	0.933132	Bladder cancer	0.102482	0.840455	GCST90274781	20	41987913	0.0258	5.98e-06	20_41987913_T_C	14288	C-X-C motif chemokine 11 levels	0.00143256	0.00152443	21.8112	42.6787	20.4949
rs185516256	T	C	T	C	0.1566	-0.256293	0.9575	0.975558	Bladder cancer	0.167263	0.125455	GCST90274781	1	51541675	0.0349	7.22e-06	1_51541675_T_C	14288	C-X-C motif chemokine 11 levels	0.00140738	0.00199591	28.5706	42.6787	20.1341
rs191536201	A	G	A	G	-0.3323	-0.239668	0.0117	0.00876703	Bladder cancer	0.277254	0.387349	GCST90274781	20	17839484	0.0684	1.18e-06	20_17839484_A_G	11194	C-X-C motif chemokine 11 levels	0.00210439	0.00255367	28.6539	42.6787	23.602
rs2013836	A	C	A	C	0.1383	0.110719	0.0402	0.038246	Bladder cancer	0.134046	0.40882	GCST90274781	1	181142796	0.0309	7.62e-06	1_181142796_A_C	14732	C-X-C motif chemokine 11 levels	0.00135811	0.00147598	21.7734	42.6787	20.0321
rs2245786	A	G	A	G	-0.0599	-0.0271944	0.6525	0.647163	Bladder cancer	0.0538242	0.613388	GCST90274781	20	4795382	0.0131	4.82e-06	20_4795382_A_G	14721	C-X-C motif chemokine 11 levels	0.00141846	0.00162712	23.9886	42.6787	20.9079
rs2678131	T	C	T	C	-0.1497	-0.0470958	0.0348	0.042953	Bladder cancer	0.127055	0.710882	GCST90274781	12	43091649	0.033	5.72e-06	12_43091649_T_C	14720	C-X-C motif chemokine 11 levels	0.00139624	0.00150546	22.1908	42.6787	20.5786
rs3184504	T	C	T	C	0.1236	-0.0138586	0.4764	0.482616	Bladder cancer	0.0512994	0.787043	GCST90274781	12	111884608	0.0132	7.7e-21	12_111884608_T_C	11785	C-X-C motif chemokine 11 levels	0.00738607	0.00762146	90.4934	42.6787	87.6777
rs371789589	A	G	A	G	0.154	0.0814455	0.0398	0.0356292	Bladder cancer	0.139117	0.558249	GCST90274781	13	53082648	0.034	5.91e-06	13_53082648_A_G	12189	C-X-C motif chemokine 11 levels	0.00168057	0.00181266	22.131	42.6787	20.5156
rs374784992	A	G	A	G	0.1349	0.145822	0.9402	0.94677	Bladder cancer	0.116764	0.211718	GCST90274781	4	119585039	0.0297	5.57e-06	4_119585039_A_G	11760	C-X-C motif chemokine 11 levels	0.00175152	0.00204633	24.1101	42.6787	20.6306
rs4748380	T	C	T	C	0.0901	-0.101206	0.1188	0.107863	Bladder cancer	0.0842204	0.229486	GCST90274781	10	17590681	0.019	2.12e-06	10_17590681_T_C	14732	C-X-C motif chemokine 11 levels	0.00152432	0.00169969	25.0791	42.6787	22.4876
rs59148364	A	G	A	G	0.1821	0.0498911	0.0278	0.023795	Bladder cancer	0.16833	0.766933	GCST90274781	4	77130802	0.0378	1.45e-06	4_77130802_A_G	14721	C-X-C motif chemokine 11 levels	0.00157425	0.00179246	26.4306	42.6787	23.2079
rs60141220	A	G	A	G	-0.0777	0.0802728	0.1703	0.178129	Bladder cancer	0.0671916	0.23221	GCST90274781	1	26395741	0.0165	2.49e-06	1_26395741_A_G	13221	C-X-C motif chemokine 11 levels	0.00167474	0.00170611	22.5917	42.6787	22.1755
rs6827617	A	G	A	G	-0.1724	-0.0477259	0.6041	0.592101	Bladder cancer	0.0524267	0.362645	GCST90274781	4	76916146	0.0118	2.42e-48	4_76916146_A_G	14718	C-X-C motif chemokine 11 levels	0.0142977	0.0142167	212.23	42.6787	213.457
rs7009937	T	C	T	C	0.1175	-0.0334993	0.9321	0.926418	Bladder cancer	0.0987841	0.734522	GCST90274781	8	96176796	0.025	2.6e-06	8_96176796_T_C	14288	C-X-C motif chemokine 11 levels	0.00154388	0.00174758	25.0097	42.6787	22.09
rs7222922	T	C	T	C	-0.0882	0.0730905	0.1205	0.106485	Bladder cancer	0.0837275	0.382687	GCST90274781	17	34335694	0.0182	1.26e-06	17_34335694_T_C	14726	C-X-C motif chemokine 11 levels	0.00159249	0.00164888	24.3183	42.6787	23.4852
rs72925566	A	G	A	G	-0.0973	0.00220542	0.1651	0.15303	Bladder cancer	0.0718497	0.975513	GCST90274781	6	89498971	0.0185	1.44e-07	6_89498971_A_G	11337	C-X-C motif chemokine 11 levels	0.00243446	0.00260998	29.6615	42.6787	27.6619
rs7475335	A	C	A	C	-0.0646	0.00415045	0.3172	0.339552	Bladder cancer	0.0542572	0.939025	GCST90274781	10	104343428	0.0124	1.89e-07	10_104343428_A_C	14735	C-X-C motif chemokine 11 levels	0.00183879	0.00180768	26.6808	42.6787	27.1407
rs75612655	T	C	T	C	0.5352	-0.150975	0.0084	0.00837798	Bladder cancer	0.279656	0.589293	GCST90274781	7	101594247	0.0705	3.16e-14	7_101594247_T_C	12935	C-X-C motif chemokine 11 levels	0.00443633	0.00477175	62.009	42.6787	57.6307
rs7750544	T	C	T	C	-0.0773	-0.0829986	0.165	0.170202	Bladder cancer	0.0684957	0.225614	GCST90274781	6	154177484	0.0164	2.44e-06	6_154177484_T_C	13644	C-X-C motif chemokine 11 levels	0.00162587	0.00164649	22.4985	42.6787	22.2163
rs77516076	C	G	C	G	0.1915	-0.240196	0.0233	0.0156546	Bladder cancer	0.20798	0.248132	GCST90274781	10	50895131	0.0432	9.3e-06	10_50895131_C_G	14730	C-X-C motif chemokine 11 levels	0.00133244	0.00166911	24.6237	42.6787	19.6503
rs78632565	T	C	T	C	0.1082	0.17725	0.9152	0.932554	Bladder cancer	0.10346	0.0866716	GCST90274781	8	70982905	0.0214	4.28e-07	8_70982905_T_C	14722	C-X-C motif chemokine 11 levels	0.00173367	0.00181717	26.7975	42.6787	25.5639
rs79378014	A	T	A	T	-0.1549	0.0820625	0.0325	0.0293335	Bladder cancer	0.15251	0.590523	GCST90274781	3	114380762	0.0341	5.56e-06	3_114380762_A_T	14734	C-X-C motif chemokine 11 levels	0.0013987	0.00150892	22.2631	42.6787	20.6345
rs10403201	A	G	A	G	-0.0601	-0.032275	0.2925	0.302145	Bladder cancer	0.0560411	0.564671	GCST90274782	19	14764810	0.0127	2.22e-06	19_14764810_A_G	14730	C-X-C motif chemokine 5 levels	0.00151823	0.00149497	22.0508	42.6787	22.3945
rs10821552	A	C	A	C	-0.1132	-0.10909	0.3353	0.329526	Bladder cancer	0.0547763	0.0464192	GCST90274782	9	136939992	0.0156	3.97e-13	9_136939992_A_C	9841	C-X-C motif chemokine 5 levels	0.00532322	0.00571192	56.5224	42.6787	52.6555
rs11734099	A	G	A	G	0.0769	-0.130017	0.1845	0.175471	Bladder cancer	0.067494	0.0540599	GCST90274782	4	6891435	0.0153	5e-07	4_6891435_A_G	14731	C-X-C motif chemokine 5 levels	0.00171219	0.00177952	26.2573	42.6787	25.2621
rs11779495	A	G	A	G	0.1153	0.0382552	0.0709	0.0652501	Bladder cancer	0.105788	0.717634	GCST90274782	8	81858024	0.0253	5.18e-06	8_81858024_A_G	14288	C-X-C motif chemokine 5 levels	0.0014517	0.00175145	25.0651	42.6787	20.7691
rs140828666	A	G	A	G	-0.1474	-0.0314406	0.9544	0.962	Bladder cancer	0.135667	0.816733	GCST90274782	13	53109423	0.0322	4.7e-06	13_53109423_A_G	12401	C-X-C motif chemokine 5 levels	0.00168719	0.00189113	23.4925	42.6787	20.9548
rs146553494	A	G	A	G	0.1844	-0.145754	0.0265	0.0252715	Bladder cancer	0.163525	0.372755	GCST90274782	3	183850210	0.0377	1e-06	3_183850210_A_G	14733	C-X-C motif chemokine 5 levels	0.00162145	0.00175442	25.8898	42.6787	23.9243
rs2004100	T	C	T	C	0.0675	0.0667396	0.2492	0.237871	Bladder cancer	0.0617624	0.279881	GCST90274782	8	144554731	0.0147	4.39e-06	8_144554731_T_C	13224	C-X-C motif chemokine 5 levels	0.00159215	0.00170494	22.5813	42.6787	21.085
rs2647400	C	G	C	G	0.0631	0.0479497	0.2784	0.265662	Bladder cancer	0.0582057	0.410054	GCST90274782	6	76351999	0.013	1.21e-06	6_76351999_C_G	14734	C-X-C motif chemokine 5 levels	0.00159667	0.00159976	23.6054	42.6787	23.5598
rs28750249	T	G	T	G	-0.118	-0.0835517	0.945	0.944543	Bladder cancer	0.112485	0.457613	GCST90274782	4	23807061	0.0266	9.16e-06	4_23807061_T_G	14735	C-X-C motif chemokine 5 levels	0.00133392	0.0014474	21.3555	42.6787	19.6789
rs3183927	A	G	A	G	-0.0619	0.00375644	0.6436	0.636739	Bladder cancer	0.053375	0.943893	GCST90274782	9	100684757	0.0121	3.13e-07	9_100684757_A_G	14725	C-X-C motif chemokine 5 levels	0.00177436	0.00175778	25.9254	42.6787	26.1704
rs425535	T	C	T	C	0.5063	0.171425	0.1127	0.117795	Bladder cancer	0.0793065	0.0306531	GCST90274782	4	74863997	0.0181	3.52e-172	4_74863997_T_C	14731	C-X-C motif chemokine 5 levels	0.0504436	0.0512673	795.92	42.6787	782.454
rs4279906	T	C	T	C	0.2082	-0.0136529	0.0209	0.0205582	Bladder cancer	0.18044	0.939686	GCST90274782	1	211477063	0.042	7.15e-07	1_211477063_T_C	14717	C-X-C motif chemokine 5 levels	0.00166716	0.00177405	26.1515	42.6787	24.5733
rs571211418	A	G	A	G	0.078	-0.0800491	0.1827	0.179392	Bladder cancer	0.0683578	0.241587	GCST90274782	1	162778011	0.0172	5.76e-06	1_162778011_A_G	11760	C-X-C motif chemokine 5 levels	0.00174598	0.00181693	21.4024	42.6787	20.5652
rs59312158	A	G	A	G	-0.19	-0.229836	0.0309	0.0181649	Bladder cancer	0.194188	0.23658	GCST90274782	16	88582345	0.0385	8.01e-07	16_88582345_A_G	13672	C-X-C motif chemokine 5 levels	0.00177846	0.00216204	29.6192	42.6787	24.3549
rs6993770	A	T	A	T	-0.1058	-0.0423598	0.7312	0.713395	Bladder cancer	0.0567075	0.455071	GCST90274782	8	106581528	0.0135	4.61e-15	8_106581528_A_T	14288	C-X-C motif chemokine 5 levels	0.00428085	0.00440014	63.1383	42.6787	61.4191
rs7090111	C	G	C	G	-0.1734	0.0218227	0.5834	0.583275	Bladder cancer	0.0521353	0.675525	GCST90274782	10	65077994	0.0117	1.08e-49	10_65077994_C_G	14735	C-X-C motif chemokine 5 levels	0.0146895	0.0146155	218.524	42.6787	219.648
rs7197943	A	C	A	C	0.0552	0.00149052	0.6522	0.635596	Bladder cancer	0.0532909	0.977687	GCST90274782	16	64226202	0.0123	7.2e-06	16_64226202_A_C	14719	C-X-C motif chemokine 5 levels	0.00136664	0.00138235	20.3722	42.6787	20.1404
rs7636889	A	G	A	G	-0.0768	-0.172977	0.7593	0.765355	Bladder cancer	0.0613457	0.00480669	GCST90274782	3	56874033	0.0137	2.07e-08	3_56874033_A_G	14733	C-X-C motif chemokine 5 levels	0.00212875	0.00215597	31.8282	42.6787	31.4254
rs7781261	A	G	A	G	-0.0675	-0.0631989	0.8155	0.806845	Bladder cancer	0.0651412	0.331956	GCST90274782	7	111992684	0.0151	7.81e-06	7_111992684_A_G	14728	C-X-C motif chemokine 5 levels	0.00135513	0.00137106	20.218	42.6787	19.9827
rs79649467	T	G	T	G	-0.1721	0.174349	0.0605	0.045381	Bladder cancer	0.125404	0.164439	GCST90274782	4	74880852	0.0276	4.5e-10	4_74880852_T_G	14288	C-X-C motif chemokine 5 levels	0.00271427	0.00336701	48.2636	42.6787	38.8816
rs916776	T	G	T	G	0.0546	0.0890991	0.3883	0.376625	Bladder cancer	0.0528895	0.0920605	GCST90274782	16	26812516	0.0122	7.63e-06	16_26812516_T_G	14287	C-X-C motif chemokine 5 levels	0.00140016	0.00141619	20.2589	42.6787	20.0293
rs9429422	T	C	T	C	0.0601	0.0283783	0.2633	0.2383	Bladder cancer	0.0607861	0.640604	GCST90274782	1	112467126	0.0135	8.51e-06	1_112467126_T_C	14288	C-X-C motif chemokine 5 levels	0.00138538	0.00140127	20.0466	42.6787	19.819
rs12075	A	G	A	G	0.0816	-0.0188169	0.5554	0.579642	Bladder cancer	0.0520685	0.71781	GCST90274783	1	159175354	0.0115	1.29e-12	1_159175354_A_G	14741	C-X-C motif chemokine 6 levels	0.00340436	0.00328841	48.6277	42.6787	50.3483
rs13148728	T	C	T	C	-0.4178	-0.0253616	0.5539	0.550978	Bladder cancer	0.0521004	0.626412	GCST90274783	4	74711126	0.0118	1.34e-274	4_74711126_T_C	14296	C-X-C motif chemokine 6 levels	0.0806322	0.0862642	1349.47	42.6787	1253.64
rs182381042	A	G	A	G	-0.3831	-0.119107	0.0074	0.00303157	Bladder cancer	0.470855	0.800301	GCST90274783	8	93838957	0.0799	1.63e-06	8_93838957_A_G	12935	C-X-C motif chemokine 6 levels	0.00177443	0.00215606	27.9445	42.6787	22.9896
rs597808	A	G	A	G	0.0655	-0.0245113	0.4781	0.483941	Bladder cancer	0.0515248	0.634275	GCST90274783	12	111973358	0.0135	1.22e-06	12_111973358_A_G	11344	C-X-C motif chemokine 6 levels	0.00207121	0.00214101	24.3354	42.6787	23.5405
rs74361503	T	C	T	C	-0.2873	0.143433	0.0558	0.0501728	Bladder cancer	0.117768	0.223252	GCST90274783	4	74667328	0.027	1.93e-26	4_74667328_T_C	14739	C-X-C motif chemokine 6 levels	0.00762449	0.0086976	129.301	42.6787	113.225
rs9371716	T	C	T	C	-0.0919	-0.136458	0.1328	0.129283	Bladder cancer	0.0779802	0.0801355	GCST90274783	6	154000019	0.0193	1.92e-06	6_154000019_T_C	12412	C-X-C motif chemokine 6 levels	0.00182369	0.00194526	24.1878	42.6787	22.6734
rs11130569	A	G	A	G	-0.051	-0.0305826	0.4547	0.475123	Bladder cancer	0.0516633	0.553877	GCST90274784	3	57075894	0.0114	7.69e-06	3_57075894_A_G	14727	C-X-C motif chemokine 9 levels	0.00135733	0.00128983	19.0172	42.6787	20.0139
rs113504136	T	G	T	G	-0.1494	-0.207136	0.0325	0.0258538	Bladder cancer	0.163466	0.2051	GCST90274784	10	13400390	0.0338	9.86e-06	10_13400390_T_G	14723	C-X-C motif chemokine 9 levels	0.00132542	0.00140367	20.6925	42.6787	19.5374
rs114033894	T	G	T	G	-0.2245	-0.169612	0.981	0.983688	Bladder cancer	0.203011	0.403448	GCST90274784	2	86977227	0.0488	4.22e-06	2_86977227_T_G	14287	C-X-C motif chemokine 9 levels	0.00147935	0.00187882	26.8895	42.6787	21.1638
rs12191307	A	G	A	G	-0.1452	0.0402966	0.098	0.109538	Bladder cancer	0.0827684	0.626358	GCST90274784	6	161256529	0.0197	1.7e-13	6_161256529_A_G	14287	C-X-C motif chemokine 9 levels	0.00378854	0.00372731	53.4439	42.6787	54.3251
rs142119726	T	C	T	C	0.2705	0.107398	0.9851	0.989641	Bladder cancer	0.254843	0.673443	GCST90274784	7	48859798	0.0551	9.14e-07	7_48859798_T_C	13800	C-X-C motif chemokine 9 levels	0.00174364	0.00214798	29.7017	42.6787	24.1008
rs145607633	T	C	T	C	0.0728	0.127032	0.1625	0.163236	Bladder cancer	0.0694714	0.0674663	GCST90274784	5	19287867	0.0154	2.28e-06	5_19287867_T_C	14287	C-X-C motif chemokine 9 levels	0.00156193	0.00144255	20.6366	42.6787	22.3471
rs1758695	T	G	T	G	0.0511	-0.0206016	0.5681	0.588771	Bladder cancer	0.0521842	0.693001	GCST90274784	9	94165889	0.0115	8.85e-06	9_94165889_T_G	14732	C-X-C motif chemokine 9 levels	0.00133863	0.00128138	18.899	42.6787	19.7445
rs181816009	A	G	A	G	-0.1603	0.106958	0.0378	0.0225681	Bladder cancer	0.174918	0.540884	GCST90274784	6	31423412	0.0342	2.77e-06	6_31423412_A_G	11985	C-X-C motif chemokine 9 levels	0.00183001	0.00186919	22.4405	42.6787	21.9692
rs182152471	T	C	T	C	0.1861	0.0773295	0.028	0.0199215	Bladder cancer	0.18253	0.671819	GCST90274784	16	1803589	0.0385	1.34e-06	16_1803589_T_C	13667	C-X-C motif chemokine 9 levels	0.00170695	0.00188515	25.8093	42.6787	23.3653
rs192488790	T	C	T	C	0.2369	0.19826	0.0168	0.0130454	Bladder cancer	0.224843	0.377902	GCST90274784	11	7767109	0.0532	8.47e-06	11_7767109_T_C	13421	C-X-C motif chemokine 9 levels	0.00147552	0.00185401	24.9251	42.6787	19.8293
rs2535260	C	G	C	G	0.0642	-0.116208	0.8128	0.81418	Bladder cancer	0.0661861	0.079127	GCST90274784	6	29628883	0.0144	8.26e-06	6_29628883_C_G	14735	C-X-C motif chemokine 9 levels	0.00134731	0.00125427	18.5023	42.6787	19.8767
rs3184504	T	C	T	C	0.1008	-0.0138586	0.4744	0.482616	Bladder cancer	0.0512994	0.787043	GCST90274784	12	111884608	0.013	8.92e-15	12_111884608_T_C	11784	C-X-C motif chemokine 9 levels	0.00507697	0.005067	60.0035	42.6787	60.1221
rs35435997	A	G	A	G	0.0915	-0.0689032	0.1125	0.0962546	Bladder cancer	0.0898505	0.443162	GCST90274784	2	242665455	0.02	4.76e-06	2_242665455_A_G	12791	C-X-C motif chemokine 9 levels	0.00163394	0.00167183	21.4169	42.6787	20.9306
rs368022534	A	G	A	G	0.1686	-0.166463	0.9563	0.961723	Bladder cancer	0.134505	0.215864	GCST90274784	11	102612924	0.0371	5.51e-06	11_102612924_A_G	9256	C-X-C motif chemokine 9 levels	0.00222674	0.00237586	22.0386	42.6787	20.6522
rs4241577	A	C	A	C	-0.1419	-0.0808633	0.2629	0.242426	Bladder cancer	0.0602707	0.179703	GCST90274784	4	76930776	0.0128	1.47e-28	4_76930776_A_C	14724	C-X-C motif chemokine 9 levels	0.00827881	0.0078039	115.793	42.6787	122.898
rs4888966	C	G	C	G	-0.157	-0.0240846	0.9683	0.985178	Bladder cancer	0.217612	0.911872	GCST90274784	16	79431853	0.0343	4.71e-06	16_79431853_C_G	14287	C-X-C motif chemokine 9 levels	0.00146452	0.00151321	21.6489	42.6787	20.9513
rs58524610	T	G	T	G	0.223	-0.0230414	0.0204	0.00992773	Bladder cancer	0.256386	0.928391	GCST90274784	12	11768143	0.0491	5.58e-06	12_11768143_T_G	14287	C-X-C motif chemokine 9 levels	0.00144192	0.00198755	28.4487	42.6787	20.6275
rs61875680	A	G	A	G	-0.0758	-0.0164075	0.1611	0.146517	Bladder cancer	0.0734808	0.82331	GCST90274784	10	107966626	0.0158	1.61e-06	10_107966626_A_G	14287	C-X-C motif chemokine 9 levels	0.00160859	0.00155301	22.2192	42.6787	23.0157
rs62200304	A	C	A	C	-0.115	-0.0476865	0.9336	0.934274	Bladder cancer	0.105515	0.651313	GCST90274784	20	20119931	0.0244	2.44e-06	20_20119931_A_C	14287	C-X-C motif chemokine 9 levels	0.00155261	0.00163966	23.4611	42.6787	22.2135
rs6548432	A	G	A	G	-0.0514	-0.0157041	0.4276	0.434121	Bladder cancer	0.0522419	0.763717	GCST90274784	3	76525063	0.0114	6.52e-06	3_76525063_A_G	14724	C-X-C motif chemokine 9 levels	0.00137896	0.00129328	19.0644	42.6787	20.329
rs656739	A	G	A	G	0.0562	-0.0771174	0.6566	0.672547	Bladder cancer	0.0548455	0.159699	GCST90274784	7	29049949	0.0119	2.33e-06	7_29049949_A_G	14735	C-X-C motif chemokine 9 levels	0.00151158	0.00142431	21.0143	42.6787	22.3038
rs6586167	T	G	T	G	-0.052	0.0356475	0.5056	0.500008	Bladder cancer	0.0515892	0.489573	GCST90274784	10	90756146	0.0114	5.08e-06	10_90756146_T_G	14735	C-X-C motif chemokine 9 levels	0.00141024	0.00135183	19.9435	42.6787	20.8064
rs72991127	C	G	C	G	-0.0583	0.00656529	0.264	0.23968	Bladder cancer	0.0609482	0.914219	GCST90274784	2	236906094	0.0131	8.57e-06	2_236906094_C_G	14287	C-X-C motif chemokine 9 levels	0.00138456	0.00132084	18.8931	42.6787	19.8059
rs73194812	A	G	A	G	0.1821	0.0119151	0.9758	0.975731	Bladder cancer	0.165901	0.942745	GCST90274784	21	18734554	0.0391	3.2e-06	21_18734554_A_G	14730	C-X-C motif chemokine 9 levels	0.00147056	0.00156612	23.1021	42.6787	21.6903
rs73367822	T	C	T	C	-0.0588	-0.0800832	0.5804	0.552503	Bladder cancer	0.0517801	0.121959	GCST90274784	21	45024252	0.0126	3.06e-06	21_45024252_T_C	11760	C-X-C motif chemokine 9 levels	0.00184874	0.00168402	19.8341	42.6787	21.7778
rs73606147	A	C	A	C	0.2792	-0.060912	0.0133	0.0062547	Bladder cancer	0.324202	0.850968	GCST90274784	20	2538467	0.059	2.22e-06	20_2538467_A_C	13379	C-X-C motif chemokine 9 levels	0.00167125	0.00204596	27.4249	42.6787	22.3937
rs74956615	A	T	A	T	-0.1309	0.0348119	0.049	0.0534332	Bladder cancer	0.115257	0.762623	GCST90274784	19	10427721	0.0286	4.72e-06	19_10427721_A_T	13662	C-X-C motif chemokine 9 levels	0.0015312	0.00159693	21.849	42.6787	20.9482
rs75525140	C	G	C	G	-0.2062	-0.222853	0.9819	0.985309	Bladder cancer	0.214671	0.299218	GCST90274784	18	28624793	0.0465	9.23e-06	18_28624793_C_G	14725	C-X-C motif chemokine 9 levels	0.00133381	0.00151131	22.2847	42.6787	19.664
rs7600322	T	C	T	C	0.057	0.0120282	0.5214	0.507767	Bladder cancer	0.0514535	0.815165	GCST90274784	2	204754353	0.0118	1.36e-06	2_204754353_T_C	13849	C-X-C motif chemokine 9 levels	0.00168228	0.00162152	22.4897	42.6787	23.3338
rs783149	A	C	A	C	-0.0805	-0.134635	0.1958	0.165101	Bladder cancer	0.0695498	0.0528905	GCST90274784	6	161088918	0.0144	2.27e-08	6_161088918_A_C	14287	C-X-C motif chemokine 9 levels	0.00218292	0.00204079	29.2123	42.6787	31.2512
rs79551873	T	C	T	C	0.0533	0.00293366	0.3563	0.353451	Bladder cancer	0.0537266	0.956454	GCST90274784	2	231423737	0.0119	7.5e-06	2_231423737_T_C	14287	C-X-C motif chemokine 9 levels	0.0014024	0.00130312	18.6393	42.6787	20.0614
rs80348644	T	C	T	C	0.1546	0.0377983	0.0336	0.0276395	Bladder cancer	0.15757	0.810421	GCST90274784	4	160574480	0.0332	3.21e-06	4_160574480_T_C	14734	C-X-C motif chemokine 9 levels	0.00146975	0.00155219	22.9024	42.6787	21.6842
rs9366778	A	G	A	G	-0.0605	-0.071563	0.4075	0.359438	Bladder cancer	0.0535663	0.181559	GCST90274784	6	31269173	0.0115	1.43e-07	6_31269173_A_G	14735	C-X-C motif chemokine 9 levels	0.00187503	0.00176749	26.0865	42.6787	27.6767
rs10191831	T	C	T	C	-0.0591	0.0245698	0.4361	0.433682	Bladder cancer	0.0531196	0.643696	GCST90274785	2	41864408	0.0125	2.27e-06	2_41864408_T_C	12403	Delta and Notch-like epidermal growth factor-related receptor levels	0.00179935	0.00171788	21.3401	42.6787	22.354
rs10892466	C	G	C	G	0.0808	0.0320881	0.1236	0.110613	Bladder cancer	0.0824497	0.69714	GCST90274785	11	119661317	0.0175	3.89e-06	11_119661317_C_G	14732	Delta and Notch-like epidermal growth factor-related receptor levels	0.00144516	0.0014144	20.8637	42.6787	21.318
rs116179073	T	C	T	C	-0.2481	-0.104982	0.0138	0.0151499	Bladder cancer	0.20833	0.614316	GCST90274785	12	31458615	0.0537	3.84e-06	12_31458615_T_C	13800	Delta and Notch-like epidermal growth factor-related receptor levels	0.0015446	0.00167544	23.1565	42.6787	21.3454
rs116540722	A	G	A	G	-0.1726	0.0488862	0.0313	0.027994	Bladder cancer	0.154833	0.752204	GCST90274785	2	168312525	0.0381	5.89e-06	2_168312525_A_G	14735	Delta and Notch-like epidermal growth factor-related receptor levels	0.00139103	0.00180653	26.6638	42.6787	20.5226
rs116794986	A	G	A	G	0.2476	0.361499	0.9884	0.988953	Bladder cancer	0.2439	0.138298	GCST90274785	3	99306038	0.0554	7.85e-06	3_99306038_A_G	14735	Delta and Notch-like epidermal growth factor-related receptor levels	0.00135395	0.0014058	20.7407	42.6787	19.9748
rs116927267	A	G	A	G	-0.1742	-0.0455011	0.0257	0.0262168	Bladder cancer	0.161426	0.778043	GCST90274785	20	4054373	0.0389	7.53e-06	20_4054373_A_G	14734	Delta and Notch-like epidermal growth factor-related receptor levels	0.00135939	0.00151968	22.422	42.6787	20.0538
rs11725578	C	G	C	G	-0.0584	0.046376	0.697	0.685146	Bladder cancer	0.0562019	0.409277	GCST90274785	4	160466825	0.0128	5.05e-06	4_160466825_C_G	14287	Delta and Notch-like epidermal growth factor-related receptor levels	0.0014551	0.00144056	20.6081	42.6787	20.8164
rs117343254	C	G	C	G	-0.1281	0.0821848	0.942	0.963114	Bladder cancer	0.137216	0.549211	GCST90274785	7	152385669	0.0274	2.94e-06	7_152385669_C_G	14287	Delta and Notch-like epidermal growth factor-related receptor levels	0.00152775	0.00179311	25.6606	42.6787	21.8573
rs13107325	T	C	T	C	0.1066	0.00474949	0.0697	0.0747741	Bladder cancer	0.0970369	0.960963	GCST90274785	4	103188709	0.0233	4.76e-06	4_103188709_T_C	14732	Delta and Notch-like epidermal growth factor-related receptor levels	0.001419	0.00147367	21.7392	42.6787	20.9316
rs194746	T	C	T	C	0.0528	-0.021386	0.4849	0.489422	Bladder cancer	0.0515674	0.678347	GCST90274785	14	69282887	0.0112	2.43e-06	14_69282887_T_C	14723	Delta and Notch-like epidermal growth factor-related receptor levels	0.00150744	0.00139265	20.5298	42.6787	22.2245
rs207671	A	G	A	G	0.1016	-0.0182533	0.5359	0.558856	Bladder cancer	0.0519239	0.725184	GCST90274785	2	230256586	0.0117	3.83e-18	2_230256586_A_G	14287	Delta and Notch-like epidermal growth factor-related receptor levels	0.00525108	0.00513467	73.7274	42.6787	75.4077
rs2837988	A	C	A	C	0.0576	0.0609977	0.3578	0.359961	Bladder cancer	0.0540999	0.259531	GCST90274785	21	42619544	0.0118	1.05e-06	21_42619544_A_C	14733	Delta and Notch-like epidermal growth factor-related receptor levels	0.0016149	0.0015247	22.4947	42.6787	23.8276
rs28689968	T	C	T	C	0.0918	-0.0740322	0.1074	0.103016	Bladder cancer	0.0844702	0.380797	GCST90274785	17	47247257	0.0184	6.07e-07	17_47247257_T_C	14733	Delta and Notch-like epidermal growth factor-related receptor levels	0.00168688	0.00161576	23.8403	42.6787	24.8914
rs35032874	T	G	T	G	0.132	0.0355145	0.7027	0.707708	Bladder cancer	0.0586295	0.544684	GCST90274785	2	230309360	0.0132	1.52e-23	2_230309360_T_G	14287	Delta and Notch-like epidermal growth factor-related receptor levels	0.00695169	0.00728019	104.76	42.6787	100
rs35107184	T	G	T	G	0.0586	-0.0148404	0.4047	0.390496	Bladder cancer	0.05397	0.783335	GCST90274785	2	113834459	0.013	6.55e-06	2_113834459_T_G	11759	Delta and Notch-like epidermal growth factor-related receptor levels	0.00172529	0.0016546	19.4854	42.6787	20.3193
rs62193248	A	T	A	T	0.213	-0.0595092	0.6507	0.662517	Bladder cancer	0.0552062	0.281059	GCST90274785	2	230596917	0.0123	3.5e-67	2_230596917_A_T	14287	Delta and Notch-like epidermal growth factor-related receptor levels	0.0205611	0.0206238	300.815	42.6787	299.881
rs62253189	A	G	A	G	-0.108	0.164618	0.9404	0.94469	Bladder cancer	0.112415	0.14309	GCST90274785	3	69959680	0.0244	9.59e-06	3_69959680_A_G	14718	Delta and Notch-like epidermal growth factor-related receptor levels	0.00132954	0.00130748	19.2661	42.6787	19.5915
rs6517655	C	G	C	G	0.0757	0.0751338	0.289	0.272508	Bladder cancer	0.058082	0.19581	GCST90274785	21	42536246	0.0129	4.41e-09	21_42536246_C_G	14287	Delta and Notch-like epidermal growth factor-related receptor levels	0.00240484	0.00235499	33.7205	42.6787	34.436
rs7123587	A	C	A	C	-0.0552	0.0651219	0.6266	0.646298	Bladder cancer	0.0539104	0.22706	GCST90274785	11	1681922	0.0124	8.52e-06	11_1681922_A_C	13222	Delta and Notch-like epidermal growth factor-related receptor levels	0.00149676	0.00142585	18.8766	42.6787	19.8169
rs74890918	A	G	A	G	0.2266	0.0390723	0.0157	0.0127784	Bladder cancer	0.230402	0.865338	GCST90274785	6	32953148	0.0502	6.36e-06	6_32953148_A_G	14287	Delta and Notch-like epidermal growth factor-related receptor levels	0.00142434	0.001587	22.7063	42.6787	20.3757
rs75685422	T	C	T	C	0.0879	-0.00154054	0.1139	0.115286	Bladder cancer	0.0804566	0.984723	GCST90274785	14	95752666	0.0186	2.29e-06	14_95752666_T_C	14287	Delta and Notch-like epidermal growth factor-related receptor levels	0.00156097	0.0015596	22.3137	42.6787	22.3332
rs773112	T	C	T	C	0.0566	-0.0861028	0.3128	0.334836	Bladder cancer	0.054449	0.113798	GCST90274785	12	56375881	0.0125	5.95e-06	12_56375881_T_C	14287	Delta and Notch-like epidermal growth factor-related receptor levels	0.00143321	0.00137725	19.7011	42.6787	20.5028
rs7809355	A	C	A	C	-0.0734	0.025113	0.1553	0.153184	Bladder cancer	0.0720459	0.727413	GCST90274785	7	25386238	0.0164	7.62e-06	7_25386238_A_C	14287	Delta and Notch-like epidermal growth factor-related receptor levels	0.00140028	0.0014135	20.2204	42.6787	20.0311
rs79707450	A	C	A	C	-0.1295	-0.0217809	0.0417	0.0452279	Bladder cancer	0.123702	0.860235	GCST90274785	9	113309819	0.0287	6.42e-06	9_113309819_A_C	14733	Delta and Notch-like epidermal growth factor-related receptor levels	0.00138021	0.00134032	19.7707	42.6787	20.3599
rs9597690	A	G	A	G	-0.0531	0.00568935	0.646	0.61209	Bladder cancer	0.0532669	0.914941	GCST90274785	13	58788135	0.0118	6.8e-06	13_58788135_A_G	14720	Delta and Notch-like epidermal growth factor-related receptor levels	0.00137398	0.0012896	19.0048	42.6787	20.25
rs9967959	T	G	T	G	0.0718	-0.0487029	0.1718	0.159031	Bladder cancer	0.0712256	0.494112	GCST90274785	21	28101979	0.0152	2.32e-06	21_28101979_T_G	14731	Delta and Notch-like epidermal growth factor-related receptor levels	0.00151262	0.00146702	21.6395	42.6787	22.3132
rs112956934	T	C	T	C	0.1884	0.0869076	0.0246	0.0171541	Bladder cancer	0.199078	0.662437	GCST90274786	12	96571503	0.0407	3.67e-06	12_96571503_T_C	14737	Protein S100-A12 levels	0.00145208	0.00170337	25.142	42.6787	21.4276
rs112988802	T	C	T	C	-0.1396	-0.0512703	0.9492	0.949227	Bladder cancer	0.117585	0.662817	GCST90274786	14	59990514	0.0293	1.89e-06	14_59990514_T_C	12851	Protein S100-A12 levels	0.0017636	0.00187941	24.1941	42.6787	22.7005
rs117923478	T	C	T	C	0.1795	-0.410242	0.9721	0.981871	Bladder cancer	0.1935	0.0339962	GCST90274786	7	81211709	0.0395	5.51e-06	7_81211709_T_C	14295	Protein S100-A12 levels	0.00144273	0.00174773	25.024	42.6787	20.6507
rs13384799	T	C	T	C	-0.0622	0.0597485	0.7266	0.729833	Bladder cancer	0.0582812	0.305279	GCST90274786	2	125135589	0.0133	2.92e-06	2_125135589_T_C	14295	Protein S100-A12 levels	0.00152788	0.00153711	22.0037	42.6787	21.8714
rs140298956	A	C	A	C	-0.2114	0.199932	0.0217	0.0214176	Bladder cancer	0.17749	0.259977	GCST90274786	5	39597187	0.0467	5.99e-06	5_39597187_A_C	14295	Protein S100-A12 levels	0.00143163	0.00189746	27.1719	42.6787	20.4916
rs147302029	A	G	A	G	0.1806	-0.394974	0.0379	0.0301914	Bladder cancer	0.151306	0.00904279	GCST90274786	16	4602209	0.0345	1.65e-07	16_4602209_A_G	13649	Protein S100-A12 levels	0.00200396	0.00237862	32.5384	42.6787	27.4029
rs150015576	A	C	A	C	0.194	0.0624339	0.0217	0.0142589	Bladder cancer	0.216487	0.773044	GCST90274786	3	174824333	0.0423	4.51e-06	3_174824333_A_C	14740	Protein S100-A12 levels	0.00142516	0.00159796	23.5884	42.6787	21.034
rs150886675	A	G	A	G	-0.411	-0.054135	0.0085	0.00426286	Bladder cancer	0.398362	0.891905	GCST90274786	2	227300526	0.0911	6.44e-06	2_227300526_A_G	9876	Protein S100-A12 levels	0.00205712	0.00284725	28.194	42.6787	20.3539
rs17325940	T	C	T	C	-0.0784	-0.115521	0.8611	0.87637	Bladder cancer	0.0788865	0.143086	GCST90274786	3	60071129	0.0174	6.61e-06	3_60071129_T_C	14735	Protein S100-A12 levels	0.00137608	0.00147034	21.6944	42.6787	20.3018
rs174344	A	G	A	G	0.0617	-0.00456717	0.6296	0.627594	Bladder cancer	0.054574	0.933305	GCST90274786	22	18032226	0.0125	7.97e-07	22_18032226_A_G	14295	Protein S100-A12 levels	0.00170172	0.00177556	25.4233	42.6787	24.3641
rs1846881	A	G	A	G	-0.0737	-0.0122637	0.1925	0.191866	Bladder cancer	0.0657426	0.85202	GCST90274786	4	16409999	0.0165	7.94e-06	4_16409999_A_G	12212	Protein S100-A12 levels	0.00163133	0.00168864	20.6532	42.6787	19.9511
rs191808657	A	C	A	C	0.3059	-0.0799996	0.983	0.988972	Bladder cancer	0.246846	0.745872	GCST90274786	7	75133433	0.0665	4.22e-06	7_75133433_A_C	12412	Protein S100-A12 levels	0.00170217	0.00312746	38.9335	42.6787	21.16
rs2056031	T	C	T	C	-0.0604	-0.0421589	0.613	0.593943	Bladder cancer	0.0523497	0.420627	GCST90274786	4	12920594	0.0119	3.86e-07	4_12920594_T_C	14739	Protein S100-A12 levels	0.00174507	0.00173091	25.5527	42.6787	25.762
rs2425640	A	G	A	G	-0.0583	0.0401792	0.3511	0.356903	Bladder cancer	0.0539511	0.456433	GCST90274786	20	43028037	0.0123	2.14e-06	20_43028037_A_G	14741	Protein S100-A12 levels	0.00152194	0.00154873	22.8621	42.6787	22.4661
rs2742666	T	C	T	C	0.0629	-0.0488512	0.4364	0.407989	Bladder cancer	0.053987	0.365534	GCST90274786	1	3058233	0.0138	5.17e-06	1_3058233_T_C	11348	Protein S100-A12 levels	0.0018277	0.0019462	22.1246	42.6787	20.7751
rs2946493	T	C	T	C	0.0664	0.025253	0.7902	0.818259	Bladder cancer	0.0680006	0.710366	GCST90274786	8	12823671	0.0148	7.24e-06	8_12823671_T_C	14295	Protein S100-A12 levels	0.0014063	0.00146187	20.9251	42.6787	20.1286
rs3014874	A	G	A	G	-0.1726	0.0256217	0.2623	0.265992	Bladder cancer	0.0581366	0.659419	GCST90274786	1	153337943	0.0137	2.15e-36	1_153337943_A_G	14294	Protein S100-A12 levels	0.0109838	0.0115289	166.694	42.6787	158.723
rs369132765	A	C	A	C	0.1301	-0.126799	0.0558	0.0546443	Bladder cancer	0.114107	0.266468	GCST90274786	9	27275548	0.0294	9.64e-06	9_27275548_A_C	12194	Protein S100-A12 levels	0.00160357	0.00178354	21.7838	42.6787	19.5821
rs3802266	A	G	A	G	0.0555	-0.0798517	0.5633	0.557766	Bladder cancer	0.0518101	0.123259	GCST90274786	8	123985708	0.0118	2.56e-06	8_123985708_A_G	14740	Protein S100-A12 levels	0.00149876	0.00151544	22.3685	42.6787	22.1219
rs55783131	T	C	T	C	0.2064	-0.0429842	0.0239	0.0256329	Bladder cancer	0.16166	0.790322	GCST90274786	22	17406250	0.0425	1.19e-06	22_17406250_T_C	14728	Protein S100-A12 levels	0.00159905	0.00198766	29.3285	42.6787	23.5853
rs56268787	T	C	T	C	-0.0936	0.0169153	0.0955	0.0976396	Bladder cancer	0.086601	0.845139	GCST90274786	3	152573197	0.0203	4.01e-06	3_152573197_T_C	14737	Protein S100-A12 levels	0.00144073	0.00151354	22.3358	42.6787	21.2598
rs59538998	C	G	C	G	-0.1188	-0.160067	0.0622	0.0559634	Bladder cancer	0.112417	0.154482	GCST90274786	1	245480237	0.0258	4.13e-06	1_245480237_C_G	14295	Protein S100-A12 levels	0.00148124	0.00164651	23.5723	42.6787	21.2028
rs61742155	A	C	A	C	0.0805	0.181013	0.129	0.120553	Bladder cancer	0.0785558	0.0212078	GCST90274786	18	3896518	0.018	7.74e-06	18_3896518_A_C	14729	Protein S100-A12 levels	0.00135626	0.00145623	21.4772	42.6787	20.0008
rs61803119	T	G	T	G	0.1501	0.0186147	0.1069	0.107779	Bladder cancer	0.0837997	0.82421	GCST90274786	1	153390202	0.0194	1.02e-14	1_153390202_T_G	14295	Protein S100-A12 levels	0.0041708	0.00430199	61.754	42.6787	59.8629
rs78800546	A	G	A	G	-0.2529	0.0563939	0.0156	0.0123366	Bladder cancer	0.231504	0.807542	GCST90274786	11	31879143	0.0534	2.18e-06	11_31879143_A_G	14295	Protein S100-A12 levels	0.00156679	0.00196437	28.132	42.6787	22.4293
rs10777251	A	G	A	G	-0.0767	0.109441	0.1923	0.182186	Bladder cancer	0.0688697	0.112039	GCST90274787	12	91080475	0.0166	3.83e-06	12_91080475_A_G	12411	Fibroblast growth factor 19 levels	0.00171748	0.00182747	22.7186	42.6787	21.3489
rs111914842	T	C	T	C	-0.1634	-0.191791	0.0368	0.036825	Bladder cancer	0.136142	0.158907	GCST90274787	22	46332463	0.0362	6.37e-06	22_46332463_T_C	13667	Fibroblast growth factor 19 levels	0.00148878	0.00189277	25.9138	42.6787	20.3745
rs112126444	A	G	A	G	-0.0927	-0.157063	0.1012	0.100064	Bladder cancer	0.0853179	0.0656345	GCST90274787	3	132162249	0.0199	3.19e-06	3_132162249_A_G	14735	Fibroblast growth factor 19 levels	0.0014707	0.00156327	23.0677	42.6787	21.6997
rs11244038	C	G	C	G	0.1199	0.0279357	0.0898	0.0517757	Bladder cancer	0.11606	0.809787	GCST90274787	9	136095770	0.0247	1.21e-06	9_136095770_C_G	11786	Fibroblast growth factor 19 levels	0.00199565	0.00235007	27.7585	42.6787	23.5638
rs117398067	T	C	T	C	0.2583	0.601069	0.0178	0.00657283	Bladder cancer	0.317461	0.0583093	GCST90274787	15	59188192	0.0564	4.65e-06	15_59188192_T_C	14744	Fibroblast growth factor 19 levels	0.00142075	0.00233291	34.4722	42.6787	20.9745
rs117438391	T	C	T	C	-0.2079	-0.227749	0.0225	0.0197377	Bladder cancer	0.186371	0.2217	GCST90274787	14	38084604	0.0466	8.14e-06	14_38084604_T_C	13868	Fibroblast growth factor 19 levels	0.00143338	0.00190125	26.4129	42.6787	19.9039
rs12110436	T	C	T	C	-0.136	0.0334651	0.0418	0.0418807	Bladder cancer	0.128099	0.793904	GCST90274787	6	168606201	0.0297	4.67e-06	6_168606201_T_C	14743	Fibroblast growth factor 19 levels	0.00142043	0.00148163	21.8731	42.6787	20.9684
rs12342925	A	T	A	T	-0.1352	0.115903	0.0429	0.0357121	Bladder cancer	0.139273	0.405297	GCST90274787	9	82082569	0.0299	6.13e-06	9_82082569_A_T	14744	Fibroblast growth factor 19 levels	0.00138501	0.00150106	22.1619	42.6787	20.4461
rs12407505	A	G	A	G	-0.1614	-0.00431331	0.9664	0.971075	Bladder cancer	0.153406	0.977569	GCST90274787	1	85295202	0.0352	4.53e-06	1_85295202_A_G	14735	Fibroblast growth factor 19 levels	0.00142499	0.00169174	24.9666	42.6787	21.0243
rs12520287	T	C	T	C	-0.1014	0.0171092	0.9175	0.923616	Bladder cancer	0.097069	0.860091	GCST90274787	5	54847098	0.0221	4.47e-06	5_54847098_T_C	14296	Fibroblast growth factor 19 levels	0.00147061	0.00155656	22.2842	42.6787	21.0519
rs13103023	A	G	A	G	0.0837	-0.041756	0.3415	0.325589	Bladder cancer	0.0547409	0.445586	GCST90274787	4	39457617	0.0124	1.48e-11	4_39457617_A_G	14296	Fibroblast growth factor 19 levels	0.0031774	0.00315085	45.1806	42.6787	45.5625
rs141140791	T	C	T	C	-0.1293	0.0517962	0.0497	0.0475764	Bladder cancer	0.120838	0.668183	GCST90274787	10	61186227	0.0286	6.16e-06	10_61186227_T_C	14733	Fibroblast growth factor 19 levels	0.00138558	0.00157923	23.3004	42.6787	20.4393
rs142067135	A	G	A	G	-0.2295	-0.132626	0.0198	0.0197672	Bladder cancer	0.184804	0.472969	GCST90274787	12	76644195	0.0492	3.09e-06	12_76644195_A_G	13809	Fibroblast growth factor 19 levels	0.00157345	0.00204444	28.2855	42.6787	21.7588
rs142585344	A	G	A	G	0.2133	0.134721	0.0218	0.0218339	Bladder cancer	0.176601	0.44555	GCST90274787	2	32584586	0.0482	9.63e-06	2_32584586_A_G	13809	Fibroblast growth factor 19 levels	0.00141636	0.00194042	26.8435	42.6787	19.5834
rs145274424	T	C	T	C	0.1992	-0.105218	0.9777	0.982378	Bladder cancer	0.193901	0.587378	GCST90274787	7	17445553	0.0421	2.23e-06	7_17445553_T_C	14735	Fibroblast growth factor 19 levels	0.00151727	0.00173029	25.5366	42.6787	22.388
rs145434248	A	G	A	G	-0.1442	0.0483236	0.0425	0.0316861	Bladder cancer	0.150773	0.748585	GCST90274787	14	64892172	0.0323	8.03e-06	14_64892172_A_G	14296	Fibroblast growth factor 19 levels	0.00139241	0.00169234	24.2313	42.6787	19.9308
rs1671812	T	C	T	C	0.0621	-0.0542664	0.6316	0.609427	Bladder cancer	0.0550868	0.324571	GCST90274787	11	114495920	0.0132	2.54e-06	11_114495920_T_C	12412	Fibroblast growth factor 19 levels	0.00178029	0.00179463	22.3114	42.6787	22.1327
rs17326790	T	C	T	C	0.2161	-0.300452	0.0209	0.0155083	Bladder cancer	0.206465	0.145608	GCST90274787	13	85357827	0.0471	4.47e-06	13_85357827_T_C	14741	Fibroblast growth factor 19 levels	0.0014262	0.00191123	28.2236	42.6787	21.0508
rs191522330	T	C	T	C	0.2325	0.170329	0.9812	0.985764	Bladder cancer	0.217575	0.433714	GCST90274787	11	5610048	0.0488	1.89e-06	11_5610048_T_C	14738	Fibroblast growth factor 19 levels	0.00153801	0.0019943	29.4468	42.6787	22.699
rs2906655	T	C	T	C	-0.0623	0.0825307	0.2503	0.239895	Bladder cancer	0.0606769	0.173778	GCST90274787	7	101569302	0.0135	3.93e-06	7_101569302_T_C	14743	Fibroblast growth factor 19 levels	0.00144263	0.00145665	21.5038	42.6787	21.2965
rs35836706	A	G	A	G	0.2151	-0.054418	0.0203	0.0196191	Bladder cancer	0.186114	0.769987	GCST90274787	9	84435749	0.0456	2.39e-06	9_84435749_A_G	14734	Fibroblast growth factor 19 levels	0.00150811	0.00184035	27.162	42.6787	22.2511
rs3846346	T	G	T	G	0.1372	0.0358592	0.0459	0.0388546	Bladder cancer	0.134632	0.78997	GCST90274787	4	27730465	0.0305	6.85e-06	4_27730465_T_G	14729	Fibroblast growth factor 19 levels	0.00137214	0.00164871	24.3207	42.6787	20.2352
rs4483036	A	C	A	C	-0.0675	-0.00804299	0.2516	0.25944	Bladder cancer	0.0585945	0.890821	GCST90274787	6	8777463	0.0148	5.1e-06	6_8777463_A_C	12412	Fibroblast growth factor 19 levels	0.00167334	0.00171586	21.3304	42.6787	20.801
rs516246	T	C	T	C	-0.1661	-0.097435	0.445	0.508604	Bladder cancer	0.0512578	0.0573174	GCST90274787	19	49206172	0.0118	5.31e-45	19_49206172_T_C	14744	Fibroblast growth factor 19 levels	0.0132624	0.0136277	203.675	42.6787	198.141
rs574352299	A	G	A	G	0.2371	-0.0318867	0.9755	0.978085	Bladder cancer	0.176289	0.856464	GCST90274787	3	74674996	0.0482	8.69e-07	3_74674996_A_G	10894	Fibroblast growth factor 19 levels	0.00221665	0.00268712	29.3469	42.6787	24.1974
rs7005978	A	G	A	G	-0.1055	0.0426836	0.3458	0.336766	Bladder cancer	0.054328	0.432064	GCST90274787	8	59382715	0.0123	9.72e-18	8_59382715_A_G	14744	Fibroblast growth factor 19 levels	0.00496565	0.00503582	74.6138	42.6787	73.569
rs73775566	A	T	A	T	0.107	0.0747691	0.0677	0.0573787	Bladder cancer	0.110831	0.499916	GCST90274787	6	139960701	0.024	8.26e-06	6_139960701_A_T	14737	Fibroblast growth factor 19 levels	0.00134713	0.00144525	21.3265	42.6787	19.8767
rs75715636	A	G	A	G	0.0838	-0.0244242	0.1237	0.111833	Bladder cancer	0.0823732	0.766844	GCST90274787	3	7913293	0.0187	7.42e-06	3_7913293_A_G	14296	Fibroblast growth factor 19 levels	0.00140295	0.00152244	21.795	42.6787	20.0819
rs76708593	T	C	T	C	0.1024	0.135494	0.9158	0.922266	Bladder cancer	0.0961396	0.158734	GCST90274787	12	108147245	0.0222	3.98e-06	12_108147245_T_C	14296	Fibroblast growth factor 19 levels	0.00148626	0.00161712	23.1526	42.6787	21.2762
rs79110990	A	G	A	G	0.073	-0.11424	0.1762	0.158153	Bladder cancer	0.0706339	0.105803	GCST90274787	9	18148302	0.0156	2.88e-06	9_18148302_A_G	14295	Fibroblast growth factor 19 levels	0.00152971	0.00154705	22.1462	42.6787	21.8976
rs80023023	A	G	A	G	-0.2706	0.217536	0.0119	0.00850659	Bladder cancer	0.277092	0.432414	GCST90274787	12	20656675	0.0607	8.27e-06	12_20656675_A_G	12935	Fibroblast growth factor 19 levels	0.00153431	0.001722	22.3091	42.6787	19.8737
rs834971	A	G	A	G	-0.0614	-0.0141929	0.3002	0.28885	Bladder cancer	0.0569776	0.803286	GCST90274787	1	100098055	0.0128	1.61e-06	1_100098055_A_G	14728	Fibroblast growth factor 19 levels	0.0015601	0.00158399	23.3628	42.6787	23.01
rs10495032	T	G	T	G	-0.1557	-0.0514907	0.0383	0.0365576	Bladder cancer	0.13694	0.706909	GCST90274788	1	216837226	0.0318	9.77e-07	1_216837226_T_G	14720	Fibroblast growth factor 21 levels	0.00162618	0.00178585	26.3312	42.6787	23.973
rs12290350	T	C	T	C	-0.0689	-0.0150133	0.2168	0.208373	Bladder cancer	0.0642542	0.815253	GCST90274788	11	76480255	0.0145	2.02e-06	11_76480255_T_C	14295	Fibroblast growth factor 21 levels	0.00157723	0.00161213	23.0794	42.6787	22.5789
rs12532101	T	C	T	C	0.0659	-0.0534738	0.203	0.195981	Bladder cancer	0.0647741	0.409063	GCST90274788	7	1194526	0.0149	9.74e-06	7_1194526_T_C	14295	Fibroblast growth factor 21 levels	0.00136672	0.00140526	20.1136	42.6787	19.5613
rs1260326	T	C	T	C	0.1323	0.00528992	0.3977	0.394766	Bladder cancer	0.0524832	0.919715	GCST90274788	2	27730940	0.0119	1.03e-28	2_27730940_T_C	14730	Fibroblast growth factor 21 levels	0.00832247	0.00838529	124.543	42.6787	123.602
rs12691469	T	C	T	C	-0.0541	0.08941	0.6149	0.633794	Bladder cancer	0.0532275	0.0930018	GCST90274788	1	188409389	0.0122	9.23e-06	1_188409389_T_C	14295	Fibroblast growth factor 21 levels	0.0013739	0.00138612	19.8394	42.6787	19.6641
rs13062487	A	G	A	G	0.0571	0.0568784	0.3387	0.328231	Bladder cancer	0.0551182	0.302102	GCST90274788	3	71944243	0.0126	5.85e-06	3_71944243_A_G	14295	Fibroblast growth factor 21 levels	0.00143478	0.00146055	20.9062	42.6787	20.5367
rs13229619	A	G	A	G	-0.1609	0.0104906	0.1297	0.128756	Bladder cancer	0.0764472	0.890852	GCST90274788	7	73030175	0.0176	6.13e-20	7_73030175_A_G	14743	Fibroblast growth factor 21 levels	0.00563773	0.00584455	86.661	42.6787	83.577
rs142603673	T	C	T	C	-0.2352	0.256186	0.0232	0.0167427	Bladder cancer	0.20076	0.201926	GCST90274788	21	33860969	0.0455	2.35e-07	21_33860969_T_C	14252	Fibroblast growth factor 21 levels	0.00187164	0.00250725	35.8182	42.6787	26.7209
rs145127946	A	G	A	G	-0.1747	-0.167051	0.037	0.0281361	Bladder cancer	0.15733	0.288331	GCST90274788	1	203746507	0.036	1.22e-06	1_203746507_A_G	14295	Fibroblast growth factor 21 levels	0.00164491	0.00217492	31.1539	42.6787	23.5495
rs149561599	T	G	T	G	0.1978	-0.0941546	0.9786	0.979242	Bladder cancer	0.181346	0.603623	GCST90274788	22	20883740	0.0444	8.39e-06	22_20883740_T_G	13869	Fibroblast growth factor 21 levels	0.00142917	0.00163871	22.7613	42.6787	19.8466
rs17284047	T	C	T	C	-0.2149	-0.271953	0.9794	0.982202	Bladder cancer	0.195139	0.163427	GCST90274788	3	100519020	0.0479	7.24e-06	3_100519020_T_C	14743	Fibroblast growth factor 21 levels	0.00136359	0.0018635	27.5212	42.6787	20.1281
rs188758663	A	G	A	G	-0.3801	0.0160554	0.0104	0.00523913	Bladder cancer	0.358067	0.964236	GCST90274788	10	127847758	0.0749	3.88e-07	10_127847758_A_G	11668	Fibroblast growth factor 21 levels	0.00220268	0.00297385	34.7964	42.6787	25.7533
rs2429473	A	C	A	C	-0.0812	0.0116741	0.795	0.810857	Bladder cancer	0.0657061	0.858981	GCST90274788	12	47198899	0.0147	3.32e-08	12_47198899_A_C	14295	Fibroblast growth factor 21 levels	0.00213024	0.00214913	30.7837	42.6787	30.5125
rs35852631	C	G	C	G	-0.0608	0.10364	0.2555	0.26308	Bladder cancer	0.0583836	0.0758724	GCST90274788	5	107955452	0.0135	6.68e-06	5_107955452_C_G	14730	Fibroblast growth factor 21 levels	0.0013753	0.00140635	20.7419	42.6787	20.2833
rs374354803	A	G	A	G	0.1208	-0.00861844	0.9316	0.933194	Bladder cancer	0.103044	0.933344	GCST90274788	9	132338678	0.0266	5.59e-06	9_132338678_A_G	12198	Fibroblast growth factor 21 levels	0.00168818	0.00185973	22.7235	42.6787	20.6239
rs4700382	T	C	T	C	-0.063	-0.055014	0.2698	0.258825	Bladder cancer	0.0613824	0.370119	GCST90274788	5	55882435	0.0136	3.62e-06	5_55882435_T_C	14295	Fibroblast growth factor 21 levels	0.00149909	0.00156385	22.3871	42.6787	21.4587
rs60277384	T	C	T	C	-0.0881	0.0472768	0.8922	0.900938	Bladder cancer	0.0864157	0.584319	GCST90274788	5	84356011	0.019	3.54e-06	5_84356011_T_C	14742	Fibroblast growth factor 21 levels	0.00145651	0.00149301	22.0399	42.6787	21.5003
rs7012637	A	G	A	G	-0.0605	0.0173903	0.4812	0.473722	Bladder cancer	0.0519529	0.737828	GCST90274788	8	9173209	0.012	4.61e-07	8_9173209_A_G	14295	Fibroblast growth factor 21 levels	0.00177522	0.00182754	26.1688	42.6787	25.4184
rs72965996	A	G	A	G	-0.2215	0.057155	0.031	0.0177132	Bladder cancer	0.19635	0.770984	GCST90274788	18	72826607	0.0444	6.08e-07	18_72826607_A_G	13808	Fibroblast growth factor 21 levels	0.00179942	0.00294756	40.8143	42.6787	24.8875
rs7442192	A	G	A	G	0.0619	0.108093	0.7357	0.754054	Bladder cancer	0.0600253	0.0717364	GCST90274788	4	45023201	0.0138	7.27e-06	4_45023201_A_G	14295	Fibroblast growth factor 21 levels	0.00140569	0.00149008	21.3295	42.6787	20.1198
rs7610704	T	C	T	C	-0.0568	-0.022127	0.4644	0.453036	Bladder cancer	0.0516448	0.668327	GCST90274788	3	11689679	0.012	2.21e-06	3_11689679_T_C	14295	Fibroblast growth factor 21 levels	0.00156506	0.00160494	22.9763	42.6787	22.4044
rs7834283	A	G	A	G	-0.3467	0.172542	0.01	0.00525991	Bladder cancer	0.362088	0.633703	GCST90274788	8	135756557	0.0784	9.77e-06	8_135756557_A_G	9555	Fibroblast growth factor 21 levels	0.0020429	0.00237998	22.7902	42.6787	19.5558
rs79789860	T	C	T	C	-0.2003	-0.00705484	0.0209	0.0172975	Bladder cancer	0.197802	0.971549	GCST90274788	7	114309511	0.0448	7.79e-06	7_114309511_T_C	14729	Fibroblast growth factor 21 levels	0.00135551	0.00164197	24.2211	42.6787	19.9897
rs8191009	A	G	A	G	0.0678	0.0325793	0.1998	0.196222	Bladder cancer	0.0654048	0.618401	GCST90274788	8	30545827	0.0151	7.12e-06	8_30545827_A_G	14295	Fibroblast growth factor 21 levels	0.00140854	0.00146988	21.04	42.6787	20.1607
rs838131	A	C	A	C	0.1627	-0.118639	0.501	0.546019	Bladder cancer	0.0541659	0.028503	GCST90274788	19	49260677	0.013	6.15e-36	19_49260677_A_C	14294	Fibroblast growth factor 21 levels	0.0108408	0.0132356	191.7	42.6787	156.635
rs9974115	A	C	A	C	0.0758	-0.0739308	0.8308	0.855052	Bladder cancer	0.0751882	0.325471	GCST90274788	21	37867322	0.0169	7.28e-06	21_37867322_A_C	14295	Fibroblast growth factor 21 levels	0.0014055	0.00161535	23.1255	42.6787	20.1171
rs10737349	A	G	A	G	0.0746	-0.0266604	0.1462	0.14474	Bladder cancer	0.0730606	0.71518	GCST90274789	1	180583036	0.0167	7.93e-06	1_180583036_A_G	14286	Fibroblast growth factor 23 levels	0.00139505	0.00138935	19.8731	42.6787	19.9547
rs11150539	T	C	T	C	-0.056	-0.0386793	0.4938	0.483886	Bladder cancer	0.0532248	0.467401	GCST90274789	16	83137317	0.0119	2.53e-06	16_83137317_T_C	14287	Fibroblast growth factor 23 levels	0.00154785	0.00156776	22.4306	42.6787	22.1453
rs117963256	A	T	A	T	-0.291	-0.0585318	0.0117	0.0104051	Bladder cancer	0.252555	0.816726	GCST90274789	8	19386357	0.0653	8.34e-06	8_19386357_A_T	12304	Fibroblast growth factor 23 levels	0.0016117	0.00195835	24.1389	42.6787	19.8591
rs118177380	A	G	A	G	0.2362	0.0930814	0.0187	0.0145913	Bladder cancer	0.215399	0.665643	GCST90274789	11	106531034	0.0507	3.18e-06	11_106531034_A_G	14287	Fibroblast growth factor 23 levels	0.00151706	0.00204754	29.3092	42.6787	21.7042
rs11930290	A	T	A	T	-0.1845	-0.150958	0.9748	0.976784	Bladder cancer	0.171887	0.379812	GCST90274789	4	124325226	0.0389	2.11e-06	4_124325226_A_T	12848	Fibroblast growth factor 23 levels	0.0017481	0.00167239	21.5196	42.6787	22.4954
rs12195292	A	G	A	G	-0.0768	0.127622	0.8634	0.862615	Bladder cancer	0.0751518	0.0894718	GCST90274789	6	81343345	0.0166	3.72e-06	6_81343345_A_G	14710	Fibroblast growth factor 23 levels	0.00145319	0.00139128	20.4915	42.6787	21.4046
rs138865481	A	G	A	G	-0.2386	-0.186729	0.0154	0.0146503	Bladder cancer	0.21533	0.385847	GCST90274789	1	205812500	0.0534	7.89e-06	1_205812500_A_G	13800	Fibroblast growth factor 23 levels	0.00144482	0.00172644	23.8626	42.6787	19.9645
rs145628723	A	G	A	G	0.1957	-0.051251	0.022	0.0186205	Bladder cancer	0.19359	0.79121	GCST90274789	13	103962376	0.0437	7.53e-06	13_103962376_A_G	14238	Fibroblast growth factor 23 levels	0.00140676	0.00164806	23.5005	42.6787	20.0548
rs181409232	A	C	A	C	-0.2224	0.0183669	0.0191	0.0111746	Bladder cancer	0.245923	0.940465	GCST90274789	6	31175118	0.0479	3.43e-06	6_31175118_A_C	12846	Fibroblast growth factor 23 levels	0.0016756	0.00185335	23.8486	42.6787	21.5575
rs2825747	A	G	A	G	0.0693	0.0552243	0.8386	0.836421	Bladder cancer	0.0694311	0.426391	GCST90274789	21	21059864	0.0153	5.91e-06	21_21059864_A_G	14735	Fibroblast growth factor 23 levels	0.00139055	0.00130003	19.1783	42.6787	20.5156
rs33921462	A	G	A	G	-0.0653	0.0935256	0.2766	0.259492	Bladder cancer	0.0594197	0.115491	GCST90274789	5	176814656	0.0135	1.32e-06	5_176814656_A_G	14287	Fibroblast growth factor 23 levels	0.00163519	0.00170642	24.4179	42.6787	23.3969
rs34551523	A	G	A	G	0.1704	0.0201888	0.0295	0.0282845	Bladder cancer	0.155152	0.896469	GCST90274789	5	146629145	0.0348	9.75e-07	5_146629145_A_G	14730	Fibroblast growth factor 23 levels	0.00162529	0.0016626	24.5275	42.6787	23.9762
rs35590112	T	C	T	C	0.0803	0.0209375	0.1851	0.170988	Bladder cancer	0.0697063	0.763897	GCST90274789	22	22238107	0.0166	1.32e-06	22_22238107_T_C	12386	Fibroblast growth factor 23 levels	0.00188597	0.00194523	24.1367	42.6787	23.3999
rs368215473	A	G	A	G	0.1228	-0.0318868	0.0941	0.0898931	Bladder cancer	0.0907593	0.725338	GCST90274789	22	18002038	0.0257	1.77e-06	22_18002038_A_G	9397	Fibroblast growth factor 23 levels	0.00242426	0.00257097	24.2165	42.6787	22.8313
rs370203222	C	G	C	G	0.1059	-0.16477	0.1002	0.0889126	Bladder cancer	0.0932545	0.077247	GCST90274789	7	12540548	0.0222	1.84e-06	7_12540548_C_G	11759	Fibroblast growth factor 23 levels	0.00193174	0.00202225	23.8238	42.6787	22.7555
rs3811621	C	G	C	G	0.1163	-0.0104447	0.2897	0.268509	Bladder cancer	0.0589973	0.85948	GCST90274789	2	190446541	0.0131	6.82e-19	2_190446541_C_G	14286	Fibroblast growth factor 23 levels	0.00548753	0.00556647	79.9565	42.6787	78.8164
rs4730018	A	C	A	C	0.0936	0.180079	0.9039	0.906564	Bladder cancer	0.0882057	0.0411934	GCST90274789	7	104141309	0.0206	5.53e-06	7_104141309_A_C	14287	Fibroblast growth factor 23 levels	0.00144314	0.00152204	21.7755	42.6787	20.6451
rs4958089	T	C	T	C	0.0513	-0.0132925	0.4217	0.439753	Bladder cancer	0.0523216	0.799455	GCST90274789	5	132484429	0.0115	8.16e-06	5_132484429_T_C	14735	Fibroblast growth factor 23 levels	0.00134884	0.00128358	18.9352	42.6787	19.8994
rs57479285	T	C	T	C	0.4343	-0.478963	0.0113	0.00495599	Bladder cancer	0.36562	0.190195	GCST90274789	11	111082782	0.0981	9.55e-06	11_111082782_T_C	7424	Fibroblast growth factor 23 levels	0.00263376	0.00421456	31.4129	42.6787	19.5993
rs6127099	A	T	A	T	0.0907	-0.0346932	0.706	0.729509	Bladder cancer	0.0601392	0.564019	GCST90274789	20	52731402	0.0134	1.3e-11	20_52731402_A_T	14287	Fibroblast growth factor 23 levels	0.00319694	0.00341505	48.9511	42.6787	45.8147
rs62307586	T	G	T	G	-0.0552	-0.0508029	0.2859	0.281961	Bladder cancer	0.0572565	0.374925	GCST90274789	4	61224008	0.0124	8.52e-06	4_61224008_T_G	14735	Fibroblast growth factor 23 levels	0.00134326	0.00124417	18.3533	42.6787	19.8169
rs671205	T	C	T	C	0.0708	-0.0105321	0.7502	0.76494	Bladder cancer	0.0603724	0.86151	GCST90274789	1	146522722	0.0136	1.93e-07	1_146522722_T_C	14287	Fibroblast growth factor 23 levels	0.00189359	0.00187874	26.8883	42.6787	27.1012
rs6753743	T	G	T	G	0.0941	-0.0131851	0.8733	0.894563	Bladder cancer	0.0836269	0.87472	GCST90274789	2	121962947	0.0185	3.65e-07	2_121962947_T_G	14287	Fibroblast growth factor 23 levels	0.00180788	0.00195952	28.0467	42.6787	25.8723
rs72720704	T	C	T	C	0.0725	0.0651855	0.8402	0.844599	Bladder cancer	0.0713144	0.360687	GCST90274789	1	176974037	0.0161	6.7e-06	1_176974037_T_C	14287	Fibroblast growth factor 23 levels	0.00141752	0.00141145	20.1911	42.6787	20.278
rs794007	T	C	T	C	0.0685	-0.0365488	0.2406	0.24355	Bladder cancer	0.0598762	0.541593	GCST90274789	4	40142535	0.0144	1.97e-06	4_40142535_T_C	12844	Fibroblast growth factor 23 levels	0.00175897	0.00171466	22.0575	42.6787	22.6285
rs7955866	A	G	A	G	-0.0959	-0.18513	0.1141	0.118035	Bladder cancer	0.079464	0.0198202	GCST90274789	12	4479549	0.0178	7.14e-08	12_4479549_A_G	14719	Fibroblast growth factor 23 levels	0.00196844	0.00185925	27.4135	42.6787	29.0267
rs9859317	A	G	A	G	-0.0549	-0.0944646	0.3489	0.33927	Bladder cancer	0.0545664	0.0834184	GCST90274789	3	64683150	0.0124	9.54e-06	3_64683150_A_G	14287	Fibroblast growth factor 23 levels	0.00137033	0.00136938	19.5884	42.6787	19.602
rs9950230	C	G	C	G	-0.0559	0.00280112	0.7034	0.722091	Bladder cancer	0.057383	0.961067	GCST90274789	18	56254394	0.0123	5.5e-06	18_56254394_C_G	14726	Fibroblast growth factor 23 levels	0.00140081	0.00130385	19.2229	42.6787	20.6544
rs112790107	A	G	A	G	0.509	-0.284127	0.006	0.0029131	Bladder cancer	0.49007	0.562071	GCST90274790	12	48680454	0.1062	1.64e-06	12_48680454_A_G	9845	Fibroblast growth factor 5 levels	0.00232834	0.00309032	30.5123	42.6787	22.9714
rs305897	T	C	T	C	0.1185	0.0592069	0.0828	0.079308	Bladder cancer	0.0953969	0.534838	GCST90274790	6	39710570	0.0249	1.95e-06	6_39710570_T_C	11341	Fibroblast growth factor 5 levels	0.00199341	0.00213285	24.2361	42.6787	22.6484
rs36034102	T	G	T	G	0.497	-0.0105319	0.273	0.266764	Bladder cancer	0.0584417	0.856986	GCST90274790	4	81202048	0.0143	1.15e-264	4_81202048_T_G	11341	Fibroblast growth factor 5 levels	0.0962727	0.0980482	1232.63	42.6787	1207.93
rs4326078	A	C	A	C	-0.0728	0.0472269	0.2193	0.224581	Bladder cancer	0.061398	0.441779	GCST90274790	4	70058335	0.015	1.21e-06	4_70058335_A_C	11789	Fibroblast growth factor 5 levels	0.00199439	0.00181474	21.4293	42.6787	23.5548
rs56391958	A	G	A	G	-0.1197	0.127783	0.0816	0.0791925	Bladder cancer	0.0953463	0.180181	GCST90274790	16	62005709	0.0249	1.53e-06	16_62005709_A_G	11341	Fibroblast growth factor 5 levels	0.0020339	0.00214753	24.4033	42.6787	23.1094
rs73212350	A	G	A	G	0.0826	-0.0718158	0.8353	0.842516	Bladder cancer	0.0706538	0.309417	GCST90274790	13	62081113	0.0169	1.02e-06	13_62081113_A_G	11787	Fibroblast growth factor 5 levels	0.00202292	0.00187727	22.1652	42.6787	23.8884
rs75936934	A	G	A	G	-0.3522	0.129803	0.0174	0.0185363	Bladder cancer	0.189988	0.49447	GCST90274790	4	81544248	0.0524	1.8e-11	4_81544248_A_G	11302	Fibroblast growth factor 5 levels	0.00398203	0.00424165	48.1348	42.6787	45.1769
rs10164255	T	G	T	G	0.0556	-0.0167573	0.408	0.400519	Bladder cancer	0.0524527	0.749367	GCST90274791	18	70532840	0.0121	4.33e-06	18_70532840_T_G	14729	Fms-related tyrosine kinase 3 ligand levels	0.00143167	0.00149335	22.0254	42.6787	21.1144
rs11212636	A	G	A	G	-0.0772	0.0548617	0.4171	0.40978	Bladder cancer	0.0521686	0.292972	GCST90274791	11	108311965	0.0117	4.16e-11	11_108311965_A_G	14723	Fms-related tyrosine kinase 3 ligand levels	0.00294878	0.002898	42.7855	42.6787	43.5374
rs112538528	A	C	A	C	-0.2426	0.586867	0.9835	0.993487	Bladder cancer	0.326618	0.0723674	GCST90274791	1	236377861	0.0547	9.2e-06	1_236377861_A_C	13305	Fms-related tyrosine kinase 3 ligand levels	0.00147644	0.00191016	25.4595	42.6787	19.6701
rs113877570	A	G	A	G	-0.1207	-0.080538	0.0513	0.0536639	Bladder cancer	0.114424	0.481524	GCST90274791	2	36270546	0.0266	5.69e-06	2_36270546_A_G	14729	Fms-related tyrosine kinase 3 ligand levels	0.00139614	0.00141805	20.9132	42.6787	20.5898
rs117040659	T	C	T	C	0.3667	-0.527786	0.0086	0.00283511	Bladder cancer	0.486211	0.277697	GCST90274791	8	29348124	0.0815	6.81e-06	8_29348124_T_C	14286	Fms-related tyrosine kinase 3 ligand levels	0.00141528	0.00229297	32.8281	42.6787	20.2445
rs11961049	A	G	A	G	0.1031	-0.0945056	0.0686	0.0642808	Bladder cancer	0.105373	0.369789	GCST90274791	6	155496339	0.0232	8.83e-06	6_155496339_A_G	14724	Fms-related tyrosine kinase 3 ligand levels	0.00133965	0.00135834	20.0246	42.6787	19.7488
rs12338549	T	C	T	C	-0.0851	-0.0573976	0.1096	0.09885	Bladder cancer	0.0862664	0.505824	GCST90274791	9	94348687	0.0186	4.76e-06	9_94348687_T_C	14719	Fms-related tyrosine kinase 3 ligand levels	0.00142035	0.00141346	20.8314	42.6787	20.9331
rs1379304	T	C	T	C	0.0603	-0.0382752	0.3741	0.358085	Bladder cancer	0.0562259	0.496037	GCST90274791	5	6289394	0.0127	2.05e-06	5_6289394_T_C	14286	Fms-related tyrosine kinase 3 ligand levels	0.00157577	0.00170277	24.3639	42.6787	22.5438
rs141117375	T	C	T	C	-0.1519	-0.340844	0.0364	0.0361237	Bladder cancer	0.137997	0.0135135	GCST90274791	11	62294309	0.0331	4.45e-06	11_62294309_T_C	14286	Fms-related tyrosine kinase 3 ligand levels	0.00147221	0.00161862	23.1578	42.6787	21.0601
rs144317085	A	T	A	T	0.2206	-0.0157776	0.9647	0.967203	Bladder cancer	0.145245	0.913498	GCST90274791	4	105806108	0.0324	9.85e-12	4_105806108_A_T	14722	Fms-related tyrosine kinase 3 ligand levels	0.00313941	0.00331442	48.9506	42.6787	46.3576
rs17272847	A	G	A	G	0.1179	-0.141126	0.0907	0.0861294	Bladder cancer	0.0912136	0.121813	GCST90274791	19	49979398	0.022	8.36e-08	19_49979398_A_G	13222	Fms-related tyrosine kinase 3 ligand levels	0.00216775	0.00229283	30.3809	42.6787	28.7199
rs184038883	A	C	A	C	-0.2276	-0.38775	0.0242	0.0131042	Bladder cancer	0.228363	0.0895165	GCST90274791	4	185989605	0.0504	6.31e-06	4_185989605_A_C	12790	Fms-related tyrosine kinase 3 ligand levels	0.00159217	0.00244653	31.363	42.6787	20.3931
rs185979634	T	C	T	C	0.1483	-0.0129223	0.9513	0.95143	Bladder cancer	0.120104	0.914319	GCST90274791	10	101403323	0.0306	1.26e-06	10_101403323_T_C	12847	Fms-related tyrosine kinase 3 ligand levels	0.00182521	0.00203779	26.2288	42.6787	23.4876
rs1866051	T	C	T	C	-0.0746	-0.0207753	0.4771	0.50689	Bladder cancer	0.0513244	0.685636	GCST90274791	2	65602149	0.0115	8.76e-11	2_65602149_T_C	14732	Fms-related tyrosine kinase 3 ligand levels	0.00284866	0.00277674	41.0153	42.6787	42.0806
rs186975	C	G	C	G	0.0554	0.0133109	0.382	0.393838	Bladder cancer	0.0526555	0.800429	GCST90274791	2	8442736	0.0119	3.23e-06	2_8442736_C_G	14703	Fms-related tyrosine kinase 3 ligand levels	0.00147211	0.00144911	21.3343	42.6787	21.6733
rs192857133	T	C	T	C	0.1812	0.0641256	0.026	0.0241085	Bladder cancer	0.169046	0.704436	GCST90274791	9	243950	0.0386	2.68e-06	9_243950_T_C	14727	Fms-related tyrosine kinase 3 ligand levels	0.0014943	0.00166295	24.5277	42.6787	22.0365
rs218265	T	C	T	C	0.0833	0.0330346	0.8361	0.848956	Bladder cancer	0.0722662	0.647581	GCST90274791	4	55408999	0.016	1.93e-07	4_55408999_T_C	14731	Fms-related tyrosine kinase 3 ligand levels	0.00183687	0.00190177	28.0645	42.6787	27.105
rs2325555	A	G	A	G	-0.0653	0.00950537	0.8002	0.80132	Bladder cancer	0.0647472	0.883284	GCST90274791	13	74312013	0.0146	7.73e-06	13_74312013_A_G	14720	Fms-related tyrosine kinase 3 ligand levels	0.00135732	0.00136349	20.0952	42.6787	20.0042
rs28533776	A	G	A	G	-0.0749	-0.115298	0.1924	0.194073	Bladder cancer	0.0649744	0.0759781	GCST90274791	7	3914756	0.0147	3.48e-07	7_3914756_A_G	14731	Fms-related tyrosine kinase 3 ligand levels	0.00175951	0.00174339	25.7233	42.6787	25.9615
rs35340580	A	G	A	G	-0.1383	0.179431	0.0449	0.0503462	Bladder cancer	0.117184	0.125722	GCST90274791	16	1526820	0.0303	5.01e-06	16_1526820_A_G	13653	Fms-related tyrosine kinase 3 ligand levels	0.00152381	0.00164047	22.4309	42.6787	20.8333
rs35977476	C	G	C	G	0.1102	0.120263	0.0668	0.0731748	Bladder cancer	0.098876	0.223872	GCST90274791	9	9191493	0.0244	6.29e-06	9_9191493_C_G	14725	Fms-related tyrosine kinase 3 ligand levels	0.00138352	0.00151406	22.3254	42.6787	20.3978
rs374309	A	G	A	G	0.0786	-0.0465418	0.8629	0.872037	Bladder cancer	0.0770919	0.546031	GCST90274791	19	22332298	0.0174	6.27e-06	19_22332298_A_G	14286	Fms-related tyrosine kinase 3 ligand levels	0.00142652	0.00146175	20.9102	42.6787	20.4055
rs4919613	A	G	A	G	-0.0662	0.0252919	0.1973	0.181653	Bladder cancer	0.0666641	0.704396	GCST90274791	10	103905779	0.0148	7.71e-06	10_103905779_A_G	14286	Fms-related tyrosine kinase 3 ligand levels	0.00139873	0.00138812	19.8554	42.6787	20.0075
rs55633025	A	G	A	G	0.0725	0.0330009	0.4738	0.490837	Bladder cancer	0.0517936	0.52402	GCST90274791	1	159890969	0.0129	1.91e-08	1_159890969_A_G	12404	Fms-related tyrosine kinase 3 ligand levels	0.00254039	0.00262091	32.5899	42.6787	31.5861
rs55646869	A	G	A	G	0.0529	0.101483	0.4437	0.39984	Bladder cancer	0.0525293	0.053367	GCST90274791	9	129753010	0.0116	5.11e-06	9_129753010_A_G	14703	Fms-related tyrosine kinase 3 ligand levels	0.00141265	0.00138146	20.337	42.6787	20.7967
rs57191857	A	G	A	G	-0.1429	-0.142031	0.9571	0.958335	Bladder cancer	0.128235	0.26804	GCST90274791	9	10640144	0.0299	1.76e-06	9_10640144_A_G	14734	Fms-related tyrosine kinase 3 ligand levels	0.00154806	0.00167691	24.7457	42.6787	22.8414
rs575588389	A	G	A	G	-0.0904	-0.123102	0.8501	0.851738	Bladder cancer	0.0725554	0.0897614	GCST90274791	4	20519864	0.0192	2.5e-06	4_20519864_A_G	12129	Fms-related tyrosine kinase 3 ligand levels	0.00182468	0.00208276	25.3103	42.6787	22.1684
rs61792394	A	G	A	G	-0.1569	0.102878	0.9624	0.956038	Bladder cancer	0.124858	0.40996	GCST90274791	3	170851052	0.0338	3.45e-06	3_170851052_A_G	14286	Fms-related tyrosine kinase 3 ligand levels	0.00150629	0.00178164	25.4943	42.6787	21.5483
rs6453962	T	C	T	C	-0.0559	-0.00904508	0.4699	0.469345	Bladder cancer	0.051504	0.860593	GCST90274791	6	77907355	0.0117	1.77e-06	6_77907355_T_C	14732	Fms-related tyrosine kinase 3 ligand levels	0.00154731	0.00155674	22.9666	42.6787	22.8272
rs67811337	A	C	A	C	0.1083	-0.0127486	0.081	0.0680438	Bladder cancer	0.104688	0.903075	GCST90274791	1	6546418	0.024	6.41e-06	1_6546418_A_C	13222	Fms-related tyrosine kinase 3 ligand levels	0.00153792	0.00174617	23.1248	42.6787	20.3627
rs6925032	A	C	A	C	0.0676	0.0245402	0.326	0.348888	Bladder cancer	0.0541672	0.650516	GCST90274791	6	91008027	0.0128	1.28e-07	6_91008027_A_C	14286	Fms-related tyrosine kinase 3 ligand levels	0.00194884	0.00200817	28.7424	42.6787	27.8916
rs72681653	A	G	A	G	0.1302	-0.194154	0.9447	0.95699	Bladder cancer	0.126061	0.12352	GCST90274791	14	51156734	0.0266	9.84e-07	14_51156734_A_G	14734	Fms-related tyrosine kinase 3 ligand levels	0.00162365	0.00177121	26.1398	42.6787	23.9584
rs73000965	A	T	A	T	0.0588	0.0312652	0.3111	0.316878	Bladder cancer	0.055476	0.57304	GCST90274791	11	113982321	0.0125	2.55e-06	11_113982321_A_T	14731	Fms-related tyrosine kinase 3 ligand levels	0.00150006	0.00148197	21.8604	42.6787	22.1276
rs74722523	T	C	T	C	0.3529	0.142473	0.9914	0.992121	Bladder cancer	0.294153	0.628137	GCST90274791	10	105351013	0.076	3.43e-06	10_105351013_T_C	11437	Fms-related tyrosine kinase 3 ligand levels	0.00188201	0.00212364	24.3355	42.6787	21.5614
rs7624160	T	G	T	G	-0.1061	-0.100561	0.6093	0.618072	Bladder cancer	0.052868	0.0571567	GCST90274791	3	128381886	0.0119	4.84e-19	3_128381886_T_G	14719	Fms-related tyrosine kinase 3 ligand levels	0.00537252	0.00535964	79.3028	42.6787	79.4945
rs7625643	A	G	A	G	0.0611	-0.0669778	0.5605	0.556104	Bladder cancer	0.0531828	0.20789	GCST90274791	3	141150026	0.0129	2.18e-06	3_141150026_A_G	12404	Fms-related tyrosine kinase 3 ligand levels	0.00180562	0.00183928	22.8527	42.6787	22.4338
rs76428106	T	C	T	C	-1.1019	0.452524	0.9832	0.989317	Bladder cancer	0.250501	0.0708444	GCST90274791	13	28604007	0.0524	3.59e-98	13_28604007_T_C	13799	Fms-related tyrosine kinase 3 ligand levels	0.0310553	0.0401112	576.54	42.6787	442.203
rs7726159	A	C	A	C	-0.1191	0.13276	0.3326	0.326839	Bladder cancer	0.0547171	0.0152539	GCST90274791	5	1282319	0.0128	1.34e-20	5_1282319_A_C	14733	Fms-related tyrosine kinase 3 ligand levels	0.00584287	0.00629741	93.355	42.6787	86.5772
rs77584520	A	T	A	T	0.1313	-0.111424	0.9568	0.962106	Bladder cancer	0.135344	0.410356	GCST90274791	1	78494817	0.0293	7.42e-06	1_78494817_A_T	14731	Fms-related tyrosine kinase 3 ligand levels	0.00136154	0.00142516	21.0212	42.6787	20.0814
rs78154669	T	G	T	G	0.0923	0.123948	0.0938	0.0788223	Bladder cancer	0.0957966	0.195712	GCST90274791	16	81591243	0.0207	8.24e-06	16_81591243_T_G	14721	Fms-related tyrosine kinase 3 ligand levels	0.00134896	0.00144831	21.3485	42.6787	19.8821
rs78429945	T	G	T	G	0.0884	-0.0331192	0.1818	0.174888	Bladder cancer	0.0691115	0.631787	GCST90274791	20	30439298	0.016	3.29e-08	20_30439298_T_G	14286	Fms-related tyrosine kinase 3 ligand levels	0.00213249	0.00232481	33.285	42.6787	30.5256
rs78723322	T	C	T	C	-0.1487	0.0124564	0.0403	0.0358663	Bladder cancer	0.138275	0.92822	GCST90274791	14	87871738	0.0329	6.19e-06	14_87871738_T_C	14734	Fms-related tyrosine kinase 3 ligand levels	0.00138474	0.00171038	25.2405	42.6787	20.4282
rs871051	T	G	T	G	0.1342	0.0153426	0.0401	0.036344	Bladder cancer	0.137516	0.911165	GCST90274791	13	95950210	0.0301	8.25e-06	13_95950210_T_G	14726	Fms-related tyrosine kinase 3 ligand levels	0.00134822	0.00138645	20.4425	42.6787	19.878
rs9381118	T	C	T	C	0.0643	-0.077379	0.2577	0.260268	Bladder cancer	0.0586212	0.186841	GCST90274791	6	41985436	0.0136	2.27e-06	6_41985436_T_C	14285	Fms-related tyrosine kinase 3 ligand levels	0.00156259	0.00158178	22.6283	42.6787	22.3534
rs9554186	A	T	A	T	0.0821	-0.0159899	0.3602	0.337707	Bladder cancer	0.0557839	0.774387	GCST90274791	13	28455266	0.0128	1.42e-10	13_28455266_A_T	14286	Fms-related tyrosine kinase 3 ligand levels	0.00287189	0.00310673	44.5149	42.6787	41.1402
rs10982156	A	T	A	T	-0.1073	-0.0794937	0.0803	0.0594851	Bladder cancer	0.110818	0.473168	GCST90274792	9	117088064	0.0236	5.45e-06	9_117088064_A_T	14288	Glial cell line-derived neurotrophic factor levels	0.0014449	0.00170056	24.3355	42.6787	20.6717
rs112594435	T	C	T	C	0.1531	0.0999571	0.0371	0.031531	Bladder cancer	0.147655	0.498429	GCST90274792	6	134688249	0.0333	4.27e-06	6_134688249_T_C	14721	Glial cell line-derived neurotrophic factor levels	0.00143404	0.00167469	24.6912	42.6787	21.1379
rs116928328	T	C	T	C	0.3727	-0.0786819	0.9927	0.993843	Bladder cancer	0.329785	0.811427	GCST90274792	21	38984857	0.0821	5.64e-06	21_38984857_T_C	13801	Glial cell line-derived neurotrophic factor levels	0.0014912	0.00201321	27.8364	42.6787	20.6078
rs117195704	A	G	A	G	-0.1377	0.188288	0.0386	0.0386066	Bladder cancer	0.132786	0.156196	GCST90274792	10	61379709	0.0309	8.34e-06	10_61379709_A_G	14723	Glial cell line-derived neurotrophic factor levels	0.00134719	0.00140731	20.7462	42.6787	19.8587
rs11740708	A	G	A	G	-0.3888	-0.0406378	0.0906	0.0955525	Bladder cancer	0.0873403	0.64173	GCST90274792	5	37868088	0.0198	7.56e-86	5_37868088_A_G	14710	Glial cell line-derived neurotrophic factor levels	0.0255464	0.0249095	375.729	42.6787	385.587
rs138691533	A	G	A	G	0.2584	0.0622855	0.0148	0.0126431	Bladder cancer	0.231527	0.787914	GCST90274792	12	98629454	0.0539	1.63e-06	12_98629454_A_G	14731	Glial cell line-derived neurotrophic factor levels	0.00155796	0.00194716	28.7356	42.6787	22.983
rs144181640	A	T	A	T	0.3366	0.122894	0.9898	0.993077	Bladder cancer	0.31444	0.695919	GCST90274792	2	208746333	0.0697	1.37e-06	2_208746333_A_T	13988	Glial cell line-derived neurotrophic factor levels	0.00166474	0.00228774	32.0696	42.6787	23.3218
rs147483239	T	C	T	C	-0.2148	-0.295352	0.019	0.0150082	Bladder cancer	0.213616	0.166778	GCST90274792	3	11787496	0.0485	9.47e-06	3_11787496_T_C	14726	Glial cell line-derived neurotrophic factor levels	0.0013304	0.00171997	25.3685	42.6787	19.6149
rs150807191	A	G	A	G	-0.1719	-0.0238804	0.9717	0.975879	Bladder cancer	0.16864	0.887392	GCST90274792	8	34985123	0.0387	8.92e-06	8_34985123_A_G	14725	Glial cell line-derived neurotrophic factor levels	0.00133829	0.00162518	23.9664	42.6787	19.7301
rs16945776	A	G	A	G	0.0871	0.0831832	0.9042	0.900531	Bladder cancer	0.0854919	0.330556	GCST90274792	17	12160288	0.0196	8.84e-06	17_12160288_A_G	14731	Glial cell line-derived neurotrophic factor levels	0.00133896	0.0013143	19.3839	42.6787	19.748
rs17353853	A	G	A	G	0.1022	-0.114214	0.9255	0.929157	Bladder cancer	0.100193	0.254313	GCST90274792	2	165822047	0.0229	8.09e-06	2_165822047_A_G	14288	Glial cell line-derived neurotrophic factor levels	0.00139224	0.00144034	20.6064	42.6787	19.9173
rs199503547	A	T	A	T	0.1128	0.0042818	0.8739	0.887498	Bladder cancer	0.0846804	0.959673	GCST90274792	1	199872965	0.0219	2.6e-07	1_199872965_A_T	10894	Glial cell line-derived neurotrophic factor levels	0.00242977	0.0028043	30.6304	42.6787	26.5296
rs2093446	C	G	C	G	0.0606	-0.0155422	0.3	0.286649	Bladder cancer	0.0575769	0.787208	GCST90274792	9	5230371	0.0129	2.63e-06	9_5230371_C_G	14288	Glial cell line-derived neurotrophic factor levels	0.00154236	0.00154239	22.0686	42.6787	22.0681
rs2194229	A	T	A	T	-0.1683	-0.0425681	0.1296	0.133939	Bladder cancer	0.0762238	0.576529	GCST90274792	5	37918839	0.0179	5.34e-21	5_37918839_A_T	14288	Glial cell line-derived neurotrophic factor levels	0.00614996	0.00639031	91.8791	42.6787	88.402
rs2453338	A	T	A	T	0.0829	0.058126	0.352	0.337591	Bladder cancer	0.0557775	0.297364	GCST90274792	5	38094871	0.0124	2.3e-11	5_38094871_A_T	14734	Glial cell line-derived neurotrophic factor levels	0.00302474	0.00313514	46.3321	42.6787	44.6957
rs35740453	A	G	A	G	-0.0718	-0.0506988	0.7373	0.76022	Bladder cancer	0.0624278	0.416723	GCST90274792	17	1490782	0.0154	3.13e-06	17_1490782_A_G	13224	Glial cell line-derived neurotrophic factor levels	0.00164133	0.00199702	26.4575	42.6787	21.7374
rs540456481	T	G	T	G	-0.2941	-0.0985269	0.0124	0.010192	Bladder cancer	0.256088	0.700431	GCST90274792	8	107706686	0.0616	1.8e-06	8_107706686_T_G	10894	Glial cell line-derived neurotrophic factor levels	0.0020884	0.00211847	23.1234	42.6787	22.7944
rs55850217	T	C	T	C	0.0816	0.0139116	0.3119	0.290091	Bladder cancer	0.0566944	0.806164	GCST90274792	19	14805280	0.014	5.59e-09	19_14805280_T_C	11755	Glial cell line-derived neurotrophic factor levels	0.00288219	0.0028581	33.6875	42.6787	33.9722
rs57104839	A	G	A	G	0.0915	0.0852804	0.903	0.908531	Bladder cancer	0.0893383	0.339792	GCST90274792	13	28147359	0.0196	3.04e-06	13_28147359_A_G	14736	Glial cell line-derived neurotrophic factor levels	0.00147696	0.00146667	21.6416	42.6787	21.7937
rs62243355	T	C	T	C	-0.0981	-0.0436209	0.0997	0.103443	Bladder cancer	0.084641	0.606299	GCST90274792	3	36072052	0.0196	5.58e-07	3_36072052_T_C	14731	Glial cell line-derived neurotrophic factor levels	0.00169791	0.00172763	25.4903	42.6787	25.051
rs72743928	T	C	T	C	0.0871	-0.136852	0.1091	0.107285	Bladder cancer	0.0829894	0.0991409	GCST90274792	9	98815653	0.0192	5.72e-06	9_98815653_T_C	14288	Glial cell line-derived neurotrophic factor levels	0.00143846	0.00147475	21.0995	42.6787	20.5795
rs77124379	T	C	T	C	-0.1117	-0.0224309	0.9259	0.921688	Bladder cancer	0.094947	0.813241	GCST90274792	16	48955894	0.0245	5.14e-06	16_48955894_T_C	14288	Glial cell line-derived neurotrophic factor levels	0.00145289	0.00171206	24.5004	42.6787	20.7862
rs77671113	A	C	A	C	-0.1194	0.171568	0.0859	0.0824893	Bladder cancer	0.0939177	0.0677304	GCST90274792	10	87694408	0.0208	9.45e-09	10_87694408_A_C	14725	Glial cell line-derived neurotrophic factor levels	0.00223313	0.00223885	33.0366	42.6787	32.952
rs79953230	T	C	T	C	0.1918	-0.217734	0.0254	0.0136687	Bladder cancer	0.224052	0.33115	GCST90274792	13	67293674	0.042	4.96e-06	13_67293674_T_C	14719	Glial cell line-derived neurotrophic factor levels	0.00141503	0.00182132	26.8533	42.6787	20.8544
rs9303102	T	G	T	G	0.2096	-0.0432184	0.0231	0.018937	Bladder cancer	0.190344	0.820382	GCST90274792	17	14221290	0.0453	3.71e-06	17_14221290_T_G	12935	Glial cell line-derived neurotrophic factor levels	0.0016526	0.00198278	25.6942	42.6787	21.4085
rs9409461	A	G	A	G	0.0528	-0.0299946	0.4811	0.478128	Bladder cancer	0.0526042	0.568547	GCST90274792	9	94530989	0.0119	9.12e-06	9_94530989_A_G	14288	Glial cell line-derived neurotrophic factor levels	0.00137615	0.00139193	19.9128	42.6787	19.6867
rs111239033	A	G	A	G	0.1021	-0.0160713	0.0699	0.0744304	Bladder cancer	0.0986584	0.870598	GCST90274793	2	43842712	0.0228	7.53e-06	2_43842712_A_G	14732	Hepatocyte growth factor levels	0.00135953	0.00135546	19.9931	42.6787	20.0531
rs113903858	A	G	A	G	0.3666	0.142067	0.014	0.00747359	Bladder cancer	0.297222	0.632662	GCST90274793	8	72362254	0.0747	9.22e-07	8_72362254_A_G	11137	Hepatocyte growth factor levels	0.00215832	0.00371039	41.4691	42.6787	24.0848
rs115009171	A	G	A	G	0.4297	0.138987	0.0078	0.00295906	Bladder cancer	0.47924	0.771804	GCST90274793	6	622484	0.0934	4.21e-06	6_622484_A_G	10300	Hepatocyte growth factor levels	0.00205113	0.00285795	29.5155	42.6787	21.1659
rs11631440	A	T	A	T	-0.0638	0.00777178	0.6021	0.632447	Bladder cancer	0.055319	0.888273	GCST90274793	15	101649383	0.012	1.06e-07	15_101649383_A_T	14709	Hepatocyte growth factor levels	0.00191832	0.00195036	28.7399	42.6787	28.2669
rs150498795	A	T	A	T	0.1566	0.104525	0.9642	0.964332	Bladder cancer	0.137877	0.448388	GCST90274793	18	76506666	0.0327	1.68e-06	18_76506666_A_T	14732	Hepatocyte growth factor levels	0.00155457	0.00169303	24.9806	42.6787	22.9344
rs1963492	T	C	T	C	-0.0749	0.0654976	0.1917	0.182392	Bladder cancer	0.066825	0.327019	GCST90274793	8	2653987	0.0168	8.26e-06	8_2653987_T_C	11335	Hepatocyte growth factor levels	0.00175081	0.00173855	19.7374	42.6787	19.8767
rs1986719	T	C	T	C	-0.1954	-0.0259687	0.9572	0.988331	Bladder cancer	0.240336	0.913955	GCST90274793	17	45959996	0.039	5.44e-07	17_45959996_T_C	14718	Hepatocyte growth factor levels	0.0017029	0.00312842	46.1824	42.6787	25.1027
rs2281532	T	C	T	C	-0.0698	0.0421462	0.7983	0.808112	Bladder cancer	0.0665361	0.526451	GCST90274793	20	6103587	0.0151	3.79e-06	20_6103587_T_C	14286	Hepatocyte growth factor levels	0.00149368	0.00156896	22.4463	42.6787	21.3677
rs2737756	A	G	A	G	0.2047	0.104733	0.0276	0.0281209	Bladder cancer	0.15383	0.495974	GCST90274793	3	128064791	0.0391	1.65e-07	3_128064791_A_G	14718	Hepatocyte growth factor levels	0.00185902	0.00224916	33.1732	42.6787	27.4083
rs34219417	T	C	T	C	0.0992	0.204587	0.8959	0.938405	Bladder cancer	0.110934	0.0651505	GCST90274793	1	38949303	0.0217	4.84e-06	1_38949303_T_C	14286	Hepatocyte growth factor levels	0.0014609	0.00183554	26.2671	42.6787	20.898
rs4290523	T	C	T	C	-0.0992	-0.0512424	0.0942	0.0916418	Bladder cancer	0.0905031	0.571261	GCST90274793	17	7014969	0.0217	4.84e-06	17_7014969_T_C	12846	Hepatocyte growth factor levels	0.00162442	0.00167933	21.6056	42.6787	20.898
rs4963955	T	C	T	C	0.1359	-0.0421154	0.9623	0.964376	Bladder cancer	0.138652	0.761319	GCST90274793	12	26274153	0.0307	9.57e-06	12_26274153_T_C	14722	Hepatocyte growth factor levels	0.00132946	0.00134005	19.752	42.6787	19.5958
rs5007364	T	C	T	C	0.0769	-0.00569072	0.7969	0.81054	Bladder cancer	0.0682641	0.933563	GCST90274793	9	107570130	0.0164	2.75e-06	9_107570130_T_C	11760	Hepatocyte growth factor levels	0.00186647	0.00191424	22.5508	42.6787	21.9869
rs57193877	T	C	T	C	0.1572	0.174921	0.9611	0.96382	Bladder cancer	0.138102	0.205297	GCST90274793	14	65654346	0.0311	4.31e-07	14_65654346_T_C	14725	Hepatocyte growth factor levels	0.00173235	0.00184779	27.2554	42.6787	25.5496
rs5745687	T	C	T	C	-0.1943	-0.0817544	0.0608	0.0655344	Bladder cancer	0.104018	0.431887	GCST90274793	7	81359051	0.0242	9.83e-16	7_81359051_T_C	14733	Hepatocyte growth factor levels	0.00435699	0.00431159	63.789	42.6787	64.4636
rs5745692	C	G	C	G	-0.1545	-0.0160116	0.964	0.968313	Bladder cancer	0.146317	0.912861	GCST90274793	7	81358266	0.0332	3.26e-06	7_81358266_C_G	14716	Hepatocyte growth factor levels	0.00146964	0.00165679	24.4184	42.6787	21.6561
rs59950280	A	G	A	G	0.1219	-0.0128942	0.328	0.326937	Bladder cancer	0.0561076	0.818238	GCST90274793	4	3452345	0.0131	1.34e-20	4_3452345_A_G	13222	Hepatocyte growth factor levels	0.00650726	0.00655059	87.1698	42.6787	86.5894
rs61897389	T	G	T	G	-0.0761	-0.0581512	0.1322	0.1328	Bladder cancer	0.0757073	0.442424	GCST90274793	11	47380087	0.0171	8.58e-06	11_47380087_T_G	14723	Hepatocyte growth factor levels	0.00134356	0.00132877	19.5869	42.6787	19.8051
rs6709159	A	G	A	G	0.0564	0.051523	0.4434	0.459134	Bladder cancer	0.0517361	0.319308	GCST90274793	2	108946178	0.0114	7.52e-07	2_108946178_A_G	14734	Hepatocyte growth factor levels	0.00165869	0.0015701	23.1671	42.6787	24.4765
rs72778371	A	G	A	G	-0.0717	-0.00277487	0.2021	0.200964	Bladder cancer	0.0662579	0.966595	GCST90274793	16	57045498	0.0161	8.45e-06	16_57045498_A_G	12789	Hepatocyte growth factor levels	0.00154862	0.00165799	21.236	42.6787	19.8329
rs73012713	A	G	A	G	-0.222	0.423313	0.0162	0.020354	Bladder cancer	0.181522	0.0196999	GCST90274793	6	146855017	0.0501	9.37e-06	6_146855017_A_G	14286	Hepatocyte growth factor levels	0.00137273	0.00157093	22.4745	42.6787	19.635
rs739269	T	C	T	C	-0.0556	0.0795305	0.6561	0.659282	Bladder cancer	0.054511	0.14457	GCST90274793	22	38212068	0.0125	8.67e-06	22_38212068_T_C	14286	Hepatocyte growth factor levels	0.00138318	0.00139502	19.9544	42.6787	19.7847
rs74130123	T	C	T	C	-0.2429	-0.70225	0.9809	0.996325	Bladder cancer	0.435893	0.107167	GCST90274793	10	30042437	0.0489	6.79e-07	10_30042437_T_C	14734	Hepatocyte growth factor levels	0.00167205	0.00221077	32.6412	42.6787	24.6739
rs7620568	A	G	A	G	-0.0856	0.0179303	0.1397	0.112985	Bladder cancer	0.0814291	0.825719	GCST90274793	3	171934440	0.0179	1.73e-06	3_171934440_A_G	12846	Hepatocyte growth factor levels	0.00177733	0.00176126	22.6616	42.6787	22.8687
rs79246709	T	G	T	G	0.1375	-0.16791	0.0427	0.0354289	Bladder cancer	0.139249	0.227883	GCST90274793	7	19933976	0.0305	6.54e-06	7_19933976_T_G	14719	Hepatocyte growth factor levels	0.00137907	0.00154565	22.7826	42.6787	20.3238
rs80308275	T	C	T	C	-0.1177	-0.0390209	0.0698	0.0465391	Bladder cancer	0.124439	0.753844	GCST90274793	4	153539149	0.026	5.98e-06	4_153539149_T_C	14731	Hepatocyte growth factor levels	0.00138941	0.00179893	26.5442	42.6787	20.493
rs8106345	A	G	A	G	0.0592	-0.00308113	0.5179	0.506576	Bladder cancer	0.0515321	0.952323	GCST90274793	19	58888317	0.0127	3.14e-06	19_58888317_A_G	12404	Hepatocyte growth factor levels	0.00174898	0.00175007	21.7425	42.6787	21.7288
rs851612	A	G	A	G	-0.1182	-0.0308655	0.9405	0.950996	Bladder cancer	0.119455	0.79611	GCST90274793	19	42769693	0.0257	4.24e-06	19_42769693_A_G	14286	Hepatocyte growth factor levels	0.00147869	0.00156365	22.3702	42.6787	21.1528
rs12408527	T	C	T	C	-0.0663	-0.0152336	0.6507	0.650098	Bladder cancer	0.0545456	0.780029	GCST90274794	1	6305053	0.015	9.87e-06	1_6305053_T_C	10279	Interferon gamma levels	0.00189738	0.00199819	20.5765	42.6787	19.5364
rs1392570	A	G	A	G	-0.0627	-0.0246311	0.6157	0.612617	Bladder cancer	0.0532515	0.643692	GCST90274794	3	20774445	0.0139	6.46e-06	3_20774445_A_G	11345	Interferon gamma levels	0.0017906	0.00186039	21.1418	42.6787	20.3472
rs140562194	T	C	T	C	0.4666	-0.332582	0.0122	0.00869189	Bladder cancer	0.275534	0.227415	GCST90274794	11	110972327	0.0897	1.97e-07	11_110972327_T_C	7396	Interferon gamma levels	0.00364619	0.00524745	39.0043	42.6787	27.0586
rs146527076	C	G	C	G	0.1935	0.0963108	0.9683	0.968628	Bladder cancer	0.14749	0.513756	GCST90274794	13	90334795	0.0384	4.68e-07	13_90334795_C_G	11781	Interferon gamma levels	0.00215108	0.00229859	27.1374	42.6787	25.3922
rs1953463	A	G	A	G	-0.0801	-0.146978	0.8282	0.83017	Bladder cancer	0.0684875	0.0318684	GCST90274794	14	44797800	0.0176	5.34e-06	14_44797800_A_G	11345	Interferon gamma levels	0.00182272	0.0018258	20.7479	42.6787	20.7128
rs34658335	T	C	T	C	0.1163	0.110808	0.0793	0.0572404	Bladder cancer	0.111907	0.322086	GCST90274794	7	10535996	0.0261	8.35e-06	7_10535996_T_C	11345	Interferon gamma levels	0.00174739	0.00197506	22.4475	42.6787	19.8554
rs4810686	T	C	T	C	0.0671	0.0508594	0.5585	0.55465	Bladder cancer	0.0521971	0.329872	GCST90274794	20	46408844	0.0137	9.69e-07	20_46408844_T_C	11344	Interferon gamma levels	0.00211056	0.00222039	25.2397	42.6787	23.9885
rs539956329	T	C	T	C	-0.1448	-0.000634821	0.9424	0.938864	Bladder cancer	0.108133	0.995316	GCST90274794	11	91764263	0.0325	8.37e-06	11_91764263_T_C	8383	Interferon gamma levels	0.00236291	0.00227628	19.121	42.6787	19.8505
rs58508092	T	G	T	G	0.2431	0.0367571	0.0213	0.0147875	Bladder cancer	0.214285	0.863804	GCST90274794	11	44064200	0.0536	5.75e-06	11_44064200_T_G	8389	Interferon gamma levels	0.00244664	0.00246393	20.7161	42.6787	20.5703
rs61863416	A	G	A	G	0.136	-0.0926752	0.9427	0.942202	Bladder cancer	0.110431	0.401348	GCST90274794	10	130545142	0.0283	1.54e-06	10_130545142_A_G	11774	Interferon gamma levels	0.00195796	0.00199819	23.5697	42.6787	23.0943
rs61904946	T	G	T	G	0.1257	0.000829829	0.0613	0.0623252	Bladder cancer	0.10629	0.993771	GCST90274794	11	116241126	0.0282	8.29e-06	11_116241126_T_G	11792	Interferon gamma levels	0.00168239	0.00181839	21.4779	42.6787	19.8688
rs62230781	A	G	A	G	0.2184	-0.238086	0.0412	0.03148	Bladder cancer	0.150932	0.114693	GCST90274794	21	37335521	0.0403	5.98e-08	21_37335521_A_G	11345	Interferon gamma levels	0.00258252	0.00376843	42.907	42.6787	29.3694
rs6442763	A	C	A	C	0.0648	0.0256691	0.4253	0.414279	Bladder cancer	0.0548878	0.640025	GCST90274794	3	2921515	0.014	3.68e-06	3_2921515_A_C	11345	Interferon gamma levels	0.00188515	0.00205266	23.3312	42.6787	21.4237
rs67101138	T	G	T	G	0.1461	-0.051899	0.9482	0.967053	Bladder cancer	0.146118	0.722451	GCST90274794	2	19234534	0.0307	1.95e-06	2_19234534_T_G	11793	Interferon gamma levels	0.00191708	0.00209682	24.7755	42.6787	22.6477
rs704	A	G	A	G	-0.0635	0.0179573	0.4705	0.475313	Bladder cancer	0.0513548	0.726585	GCST90274794	17	26694861	0.0127	5.73e-07	17_26694861_A_G	11793	Interferon gamma levels	0.00211577	0.00200911	23.7371	42.6787	25
rs74245341	A	C	A	C	0.2414	0.0538535	0.0232	0.00956945	Bladder cancer	0.266619	0.839927	GCST90274794	15	93585096	0.0533	5.92e-06	15_93585096_A_C	10720	Interferon gamma levels	0.00191019	0.00264118	28.3831	42.6787	20.5126
rs74903999	T	C	T	C	0.3485	-0.11742	0.9882	0.992312	Bladder cancer	0.294639	0.690247	GCST90274794	13	27473585	0.0708	8.55e-07	13_27473585_T_C	10558	Interferon gamma levels	0.00229005	0.00283245	29.9843	42.6787	24.2292
rs78042482	A	G	A	G	0.2688	0.195342	0.0145	0.013356	Bladder cancer	0.225148	0.385604	GCST90274794	15	58694863	0.0606	9.18e-06	15_58694863_A_G	10890	Interferon gamma levels	0.00180377	0.00206497	22.5299	42.6787	19.6749
rs7909512	A	G	A	G	0.0567	-0.0192984	0.5207	0.518996	Bladder cancer	0.0518108	0.709537	GCST90274794	10	3683786	0.0128	9.44e-06	10_3683786_A_G	11775	Interferon gamma levels	0.00166393	0.00160469	18.9224	42.6787	19.6221
rs80064136	A	G	A	G	0.2305	-0.21632	0.9818	0.986949	Bladder cancer	0.226752	0.340089	GCST90274794	1	46963687	0.0521	9.68e-06	1_46963687_A_G	11791	Interferon gamma levels	0.00165756	0.00189874	22.4269	42.6787	19.5734
rs10067443	T	C	T	C	-0.0753	-0.128335	0.8011	0.80475	Bladder cancer	0.0650332	0.0484525	GCST90274795	5	19244332	0.0149	4.33e-07	5_19244332_T_C	14296	Interleukin-10 levels	0.00178356	0.00180693	25.875	42.6787	25.5398
rs116018601	T	C	T	C	0.1763	0.41681	0.9715	0.977193	Bladder cancer	0.17398	0.016587	GCST90274795	5	132022975	0.0398	9.44e-06	5_132022975_T_C	14727	Interleukin-10 levels	0.00133078	0.00172116	25.3878	42.6787	19.6218
rs12123181	A	G	A	G	-0.0996	0.039357	0.2042	0.2018	Bladder cancer	0.0659286	0.550531	GCST90274795	1	206954566	0.0151	4.22e-11	1_206954566_A_G	14296	Interleukin-10 levels	0.00303453	0.0032241	46.2343	42.6787	43.5076
rs1370717	A	G	A	G	-0.0534	-0.00738194	0.4388	0.435748	Bladder cancer	0.0517499	0.886569	GCST90274795	3	32354387	0.0118	6.03e-06	3_32354387_A_G	14730	Interleukin-10 levels	0.00138858	0.00140442	20.7134	42.6787	20.4795
rs138203589	T	G	T	G	0.1937	-0.227358	0.0455	0.0179984	Bladder cancer	0.194368	0.242108	GCST90274795	2	125939274	0.0418	3.59e-06	2_125939274_T_G	14730	Interleukin-10 levels	0.0014559	0.00325894	48.1546	42.6787	21.4737
rs147027610	T	C	T	C	0.1876	0.0769172	0.9747	0.971342	Bladder cancer	0.154807	0.619289	GCST90274795	13	52566577	0.0416	6.49e-06	13_52566577_T_C	14250	Interleukin-10 levels	0.0014253	0.00173575	24.774	42.6787	20.3366
rs148332061	C	G	C	G	0.1112	-0.101398	0.1005	0.0682688	Bladder cancer	0.106798	0.3424	GCST90274795	7	590757	0.0239	3.28e-06	7_590757_C_G	13232	Interleukin-10 levels	0.00163359	0.00223566	29.6441	42.6787	21.6478
rs150408090	A	G	A	G	0.3666	0.0343521	0.9898	0.995906	Bladder cancer	0.40285	0.932044	GCST90274795	6	122709508	0.0761	1.45e-06	6_122709508_A_G	12313	Interleukin-10 levels	0.0018815	0.0027137	33.4993	42.6787	23.2068
rs17632797	A	G	A	G	-0.0772	0.0497033	0.8561	0.856357	Bladder cancer	0.0734036	0.498327	GCST90274795	15	95207832	0.0173	8.1e-06	15_95207832_A_G	14296	Interleukin-10 levels	0.00139118	0.00146842	21.0204	42.6787	19.9133
rs17654493	T	C	T	C	0.2951	-0.057014	0.014	0.0138062	Bladder cancer	0.219619	0.79517	GCST90274795	6	18825879	0.0626	2.43e-06	6_18825879_T_C	12313	Interleukin-10 levels	0.00180183	0.00240421	29.6696	42.6787	22.2223
rs17747934	A	G	A	G	-0.1551	0.0792033	0.9375	0.959306	Bladder cancer	0.130353	0.543448	GCST90274795	20	60272196	0.0342	5.76e-06	20_60272196_A_G	13232	Interleukin-10 levels	0.00155216	0.00281906	37.4017	42.6787	20.567
rs188535859	T	C	T	C	-0.2351	-0.0126042	0.0174	0.0175765	Bladder cancer	0.19729	0.949061	GCST90274795	2	201728383	0.0486	1.32e-06	2_201728383_T_C	14741	Interleukin-10 levels	0.00158517	0.00189	27.9094	42.6787	23.4009
rs28419759	A	C	A	C	-0.0542	0.0292534	0.5556	0.537909	Bladder cancer	0.0517982	0.572239	GCST90274795	4	78929167	0.0121	7.49e-06	4_78929167_A_C	13851	Interleukin-10 levels	0.00144671	0.00145066	20.1193	42.6787	20.0645
rs28651780	T	C	T	C	-0.0746	0.042567	0.8437	0.86801	Bladder cancer	0.0769128	0.579959	GCST90274795	4	68058232	0.0167	7.93e-06	4_68058232_T_C	14296	Interleukin-10 levels	0.00139407	0.00146776	21.011	42.6787	19.9547
rs28929474	T	C	T	C	0.2027	0.35175	0.0203	0.01993	Bladder cancer	0.183437	0.0551684	GCST90274795	14	94844947	0.0451	6.97e-06	14_94844947_T_C	14744	Interleukin-10 levels	0.00136837	0.00163428	24.132	42.6787	20.2001
rs3135932	A	G	A	G	-0.1597	0.0302149	0.823	0.834731	Bladder cancer	0.0688913	0.66096	GCST90274795	11	117864063	0.0154	3.39e-25	11_117864063_A_G	14744	Interleukin-10 levels	0.00724195	0.00743041	110.359	42.6787	107.54
rs34059323	A	G	A	G	-0.1789	-0.208565	0.0275	0.0214409	Bladder cancer	0.177189	0.239167	GCST90274795	7	148496619	0.0401	8.14e-06	7_148496619_A_G	14744	Interleukin-10 levels	0.00134831	0.00171188	25.2798	42.6787	19.9036
rs3769274	A	G	A	G	0.0771	-0.0394211	0.8403	0.842189	Bladder cancer	0.0707041	0.577152	GCST90274795	2	173757986	0.0162	1.94e-06	2_173757986_A_G	14742	Interleukin-10 levels	0.00153431	0.00159543	23.5542	42.6787	22.6505
rs385697	T	C	T	C	0.0555	-0.139404	0.6126	0.618942	Bladder cancer	0.0534848	0.00914943	GCST90274795	6	7880027	0.0119	3.1e-06	6_7880027_T_C	14727	Interleukin-10 levels	0.00147501	0.00146202	21.5597	42.6787	21.7516
rs389239	A	G	A	G	-0.0574	0.0131035	0.6162	0.628612	Bladder cancer	0.0530292	0.80483	GCST90274795	6	169465075	0.0125	4.39e-06	6_169465075_A_G	14296	Interleukin-10 levels	0.00147302	0.0015584	22.3106	42.6787	21.0865
rs398518	A	G	A	G	-0.1293	-0.00958281	0.9146	0.911134	Bladder cancer	0.0901153	0.915313	GCST90274795	3	8954959	0.0218	3.01e-09	3_8954959_A_G	14296	Interleukin-10 levels	0.00245506	0.00261166	37.4288	42.6787	35.179
rs4655953	A	G	A	G	0.0565	-0.0791096	0.3683	0.387484	Bladder cancer	0.0527966	0.134033	GCST90274795	1	87832695	0.0121	3.02e-06	1_87832695_A_G	14722	Interleukin-10 levels	0.00147902	0.00148539	21.8974	42.6787	21.8035
rs549056348	A	C	A	C	0.1647	-0.221551	0.0539	0.0422779	Bladder cancer	0.132979	0.0957002	GCST90274795	2	87296860	0.0338	1.1e-06	2_87296860_A_C	11768	Interleukin-10 levels	0.00201395	0.00276658	32.6419	42.6787	23.744
rs66624860	T	C	T	C	0.0681	-0.0208088	0.2791	0.257024	Bladder cancer	0.0601847	0.729531	GCST90274795	8	61861039	0.0143	1.91e-06	8_61861039_T_C	12799	Interleukin-10 levels	0.00176907	0.0018662	23.9265	42.6787	22.6789
rs67037615	T	C	T	C	-0.1528	0.179744	0.8893	0.88335	Bladder cancer	0.0800899	0.0248149	GCST90274795	6	32453163	0.0196	6.39e-15	6_32453163_T_C	14296	Interleukin-10 levels	0.00423388	0.00459698	66.0127	42.6787	60.7763
rs72661933	A	C	A	C	-0.2388	0.207558	0.9811	0.990817	Bladder cancer	0.269469	0.441151	GCST90274795	13	113612154	0.0535	8.06e-06	13_113612154_A_C	13809	Interleukin-10 levels	0.00144091	0.00211482	29.2612	42.6787	19.9233
rs72701782	A	G	A	G	0.0981	-0.00274164	0.0999	0.0945517	Bladder cancer	0.08794	0.975129	GCST90274795	4	185304872	0.0211	3.33e-06	4_185304872_A_G	14296	Interleukin-10 levels	0.00150995	0.00173071	24.7817	42.6787	21.6159
rs73226323	T	C	T	C	0.1847	-0.0256101	0.9755	0.98041	Bladder cancer	0.187465	0.891337	GCST90274795	3	111531258	0.0415	8.56e-06	3_111531258_T_C	14738	Interleukin-10 levels	0.00134238	0.00163064	24.0683	42.6787	19.8079
rs7500869	A	C	A	C	-0.0714	0.0232393	0.1848	0.170845	Bladder cancer	0.0687431	0.735317	GCST90274795	16	11009587	0.0159	7.1e-06	16_11009587_A_C	14743	Interleukin-10 levels	0.0013661	0.00153601	22.6771	42.6787	20.1652
rs79438518	A	T	A	T	-0.2845	-0.33134	0.0122	0.00904201	Bladder cancer	0.275281	0.228727	GCST90274795	9	18625666	0.0618	4.15e-06	9_18625666_A_T	13809	Interleukin-10 levels	0.00153258	0.00195085	26.988	42.6787	21.1928
rs9266257	C	G	C	G	-0.065	0.0186767	0.6959	0.66695	Bladder cancer	0.0560036	0.738764	GCST90274795	6	31325886	0.0129	4.69e-07	6_31325886_C_G	14728	Interleukin-10 levels	0.00172113	0.00178822	26.3804	42.6787	25.3891
rs9975090	A	G	A	G	0.0551	0.0244141	0.5972	0.577732	Bladder cancer	0.0525905	0.642483	GCST90274795	21	43024340	0.0123	7.48e-06	21_43024340_A_G	14296	Interleukin-10 levels	0.00140194	0.00146064	20.9089	42.6787	20.0675
rs10091841	T	G	T	G	0.064	0.0443169	0.4945	0.503136	Bladder cancer	0.0515395	0.389864	GCST90274796	8	9104264	0.0135	2.13e-06	8_9104264_T_G	11345	Interleukin-10 receptor subunit alpha levels	0.00197745	0.00204775	23.2753	42.6787	22.4746
rs12026492	T	C	T	C	0.0709	-0.0392237	0.2527	0.244798	Bladder cancer	0.0607206	0.518299	GCST90274796	1	226676794	0.0156	5.5e-06	1_226676794_T_C	11345	Interleukin-10 receptor subunit alpha levels	0.00181771	0.00189855	21.5762	42.6787	20.6559
rs1377036	A	G	A	G	-0.0791	-0.0397625	0.8076	0.810758	Bladder cancer	0.0654984	0.5438	GCST90274796	20	12662915	0.0179	9.92e-06	20_12662915_A_G	9907	Interleukin-10 receptor subunit alpha levels	0.0019676	0.00194439	19.2967	42.6787	19.5275
rs143313574	T	C	T	C	-0.3868	0.259587	0.0107	0.00521701	Bladder cancer	0.356631	0.466683	GCST90274796	16	5247086	0.0841	4.24e-06	16_5247086_T_C	9956	Interleukin-10 receptor subunit alpha levels	0.00212061	0.00316749	31.6293	42.6787	21.1534
rs17832137	A	G	A	G	0.1676	0.00213232	0.0481	0.0470616	Bladder cancer	0.120991	0.985939	GCST90274796	14	55005535	0.0343	1.03e-06	14_55005535_A_G	10289	Interleukin-10 receptor subunit alpha levels	0.0023156	0.00257226	26.5291	42.6787	23.8759
rs180893431	A	C	A	C	0.4057	0.0651933	0.9896	0.991598	Bladder cancer	0.280273	0.816067	GCST90274796	6	78703747	0.0865	2.73e-06	6_78703747_A_C	9340	Interleukin-10 receptor subunit alpha levels	0.00235018	0.00338792	31.7439	42.6787	21.9977
rs28408877	C	G	C	G	-0.069	-0.0507947	0.7429	0.745851	Bladder cancer	0.0592528	0.391305	GCST90274796	1	247347252	0.0153	6.49e-06	1_247347252_C_G	11345	Interleukin-10 receptor subunit alpha levels	0.00178982	0.0018187	20.6671	42.6787	20.3383
rs286605	T	G	T	G	0.0623	0.0120874	0.5891	0.581287	Bladder cancer	0.0523161	0.81728	GCST90274796	5	154443639	0.0131	1.98e-06	5_154443639_T_G	11793	Interleukin-10 receptor subunit alpha levels	0.00191448	0.00187902	22.1972	42.6787	22.6169
rs3135932	A	G	A	G	-0.0844	0.0302149	0.8171	0.834731	Bladder cancer	0.0688913	0.66096	GCST90274796	11	117864063	0.0168	5.07e-07	11_117864063_A_G	11793	Interleukin-10 receptor subunit alpha levels	0.00213593	0.00212914	25.1582	42.6787	25.2387
rs3777726	T	C	T	C	-0.075	-0.0980674	0.2995	0.30189	Bladder cancer	0.0574994	0.0880939	GCST90274796	6	167359279	0.0165	5.48e-06	6_167359279_T_C	9461	Interleukin-10 receptor subunit alpha levels	0.00217952	0.00236025	22.3784	42.6787	20.6612
rs41272625	T	G	T	G	0.082	0.100284	0.1526	0.156344	Bladder cancer	0.0707288	0.156229	GCST90274796	3	158540291	0.0179	4.63e-06	3_158540291_T_G	11784	Interleukin-10 receptor subunit alpha levels	0.00177799	0.001739	20.5246	42.6787	20.9856
rs492616	A	G	A	G	-0.0835	-0.176621	0.8497	0.863847	Bladder cancer	0.0749234	0.0184057	GCST90274796	6	116712455	0.0189	9.96e-06	6_116712455_A_G	11344	Interleukin-10 receptor subunit alpha levels	0.00171796	0.00178085	20.2344	42.6787	19.5186
rs62262707	A	C	A	C	0.2156	0.0240642	0.0253	0.02567	Bladder cancer	0.162972	0.882613	GCST90274796	3	83110489	0.0483	8.05e-06	3_83110489_A_C	11345	Interleukin-10 receptor subunit alpha levels	0.00175353	0.00229255	26.0642	42.6787	19.9252
rs6670799	A	G	A	G	-0.1247	-0.105567	0.0839	0.0774952	Bladder cancer	0.096693	0.274932	GCST90274796	1	56566352	0.0252	7.48e-07	1_56566352_A_G	11345	Interleukin-10 receptor subunit alpha levels	0.00215411	0.00239038	27.1791	42.6787	24.4868
rs74719858	A	G	A	G	0.3915	-0.645368	0.9853	0.996887	Bladder cancer	0.454629	0.155739	GCST90274796	14	66407688	0.0823	1.97e-06	14_66407688_A_G	10858	Interleukin-10 receptor subunit alpha levels	0.00208013	0.00443996	48.4152	42.6787	22.6289
rs79202194	T	C	T	C	-0.0993	0.0941235	0.1001	0.0904681	Bladder cancer	0.0905182	0.298419	GCST90274796	8	27864161	0.0224	9.29e-06	8_27864161_T_C	11792	Interleukin-10 receptor subunit alpha levels	0.00166405	0.00177647	20.9818	42.6787	19.6518
rs80137559	T	C	T	C	0.2347	-0.0719113	0.9822	0.983917	Bladder cancer	0.205025	0.72578	GCST90274796	10	18335103	0.0511	4.37e-06	10_18335103_T_C	11791	Interleukin-10 receptor subunit alpha levels	0.0017862	0.00192609	22.7505	42.6787	21.0952
rs9472032	A	C	A	C	0.0968	-0.0374821	0.1006	0.0993109	Bladder cancer	0.085653	0.661673	GCST90274796	6	43294041	0.0214	6.09e-06	6_43294041_A_C	11793	Interleukin-10 receptor subunit alpha levels	0.00173229	0.00169563	20.0272	42.6787	20.4608
rs9548767	T	G	T	G	-0.0686	0.012787	0.2251	0.228163	Bladder cancer	0.061256	0.834646	GCST90274796	13	31511360	0.0155	9.61e-06	13_31511360_T_G	11781	Interleukin-10 receptor subunit alpha levels	0.00166018	0.00164172	19.3696	42.6787	19.5878
rs958402	T	C	T	C	0.06	-0.0158891	0.4233	0.40768	Bladder cancer	0.0528847	0.763836	GCST90274796	8	97437587	0.0134	7.55e-06	8_97437587_T_C	11345	Interleukin-10 receptor subunit alpha levels	0.0017644	0.00175764	19.9721	42.6787	20.049
rs111850948	A	G	A	G	-0.0843	-0.108352	0.1348	0.144141	Bladder cancer	0.0733656	0.13971	GCST90274797	7	25740142	0.0181	3.2e-06	7_25740142_A_G	14286	Interleukin-10 receptor subunit beta levels	0.00151631	0.00165764	23.7171	42.6787	21.6919
rs112798338	T	C	T	C	0.1926	-0.0651034	0.026	0.0171996	Bladder cancer	0.201319	0.746404	GCST90274797	1	228433772	0.0411	2.78e-06	1_228433772_T_C	14286	Interleukin-10 receptor subunit beta levels	0.00153501	0.00187878	26.8869	42.6787	21.9598
rs114288486	T	C	T	C	0.1449	0.0121275	0.0363	0.0333711	Bladder cancer	0.144977	0.933334	GCST90274797	1	212796908	0.0311	3.17e-06	1_212796908_T_C	14730	Interleukin-10 receptor subunit beta levels	0.00147174	0.00146898	21.6669	42.6787	21.7078
rs115242284	T	C	T	C	-0.1662	0.135557	0.027	0.0264101	Bladder cancer	0.160855	0.399381	GCST90274797	4	183615376	0.0373	8.36e-06	4_183615376_T_C	14724	Interleukin-10 receptor subunit beta levels	0.00134677	0.00145134	21.3977	42.6787	19.8538
rs1153572	T	C	T	C	-0.0548	0.0196488	0.5866	0.579711	Bladder cancer	0.0519834	0.705444	GCST90274797	3	4275803	0.0119	4.12e-06	3_4275803_T_C	14286	Interleukin-10 receptor subunit beta levels	0.00148243	0.00145648	20.8347	42.6787	21.2064
rs116315732	T	C	T	C	0.1988	0.0906925	0.0212	0.0193939	Bladder cancer	0.183945	0.621984	GCST90274797	2	176630651	0.0402	7.6e-07	2_176630651_T_C	14734	Interleukin-10 receptor subunit beta levels	0.00165729	0.00164018	24.2029	42.6787	24.4557
rs116898411	A	G	A	G	-0.1593	-0.0780365	0.96	0.976029	Bladder cancer	0.168525	0.643324	GCST90274797	8	128868102	0.0349	5.01e-06	8_128868102_A_G	14286	Interleukin-10 receptor subunit beta levels	0.00145646	0.00194891	27.8927	42.6787	20.8344
rs117092856	A	G	A	G	-0.3461	0.491339	0.0088	0.00508249	Bladder cancer	0.368477	0.18239	GCST90274797	6	150298636	0.0783	9.86e-06	6_150298636_A_G	13420	Interleukin-10 receptor subunit beta levels	0.00145399	0.00208967	28.0979	42.6787	19.538
rs11731108	C	G	C	G	-0.0592	-0.0465413	0.7134	0.68604	Bladder cancer	0.0555897	0.402464	GCST90274797	4	185140403	0.0132	7.3e-06	4_185140403_C_G	14286	Interleukin-10 receptor subunit beta levels	0.00140616	0.00143312	20.5001	42.6787	20.1139
rs117883662	C	G	C	G	-0.4295	0.0265481	0.9904	0.995962	Bladder cancer	0.405043	0.947741	GCST90274797	19	49553051	0.0907	2.19e-06	19_49553051_C_G	8938	Interleukin-10 receptor subunit beta levels	0.00250311	0.00350783	31.4563	42.6787	22.4239
rs12087642	A	G	A	G	-0.0533	0.105582	0.3491	0.357208	Bladder cancer	0.053682	0.0492049	GCST90274797	1	216769382	0.0118	6.27e-06	1_216769382_A_G	14719	Interleukin-10 receptor subunit beta levels	0.00138442	0.00129107	19.0252	42.6787	20.4028
rs142421172	A	G	A	G	0.208	0.0384214	0.0438	0.0367818	Bladder cancer	0.137178	0.779413	GCST90274797	1	179682087	0.031	1.95e-11	1_179682087_A_G	12840	Interleukin-10 receptor subunit beta levels	0.00349451	0.00362393	46.6932	42.6787	45.0198
rs149156511	A	G	A	G	0.2066	0.203531	0.0323	0.0156227	Bladder cancer	0.210544	0.3337	GCST90274797	20	39437913	0.0444	3.27e-06	20_39437913_A_G	14286	Interleukin-10 receptor subunit beta levels	0.00151352	0.0026683	38.2159	42.6787	21.6518
rs1605333	C	G	C	G	-0.0601	0.0748248	0.6484	0.659277	Bladder cancer	0.0543177	0.168345	GCST90274797	12	58388232	0.0124	1.25e-06	12_58388232_C_G	13237	Interleukin-10 receptor subunit beta levels	0.00177179	0.00164691	21.8329	42.6787	23.4912
rs192325200	A	G	A	G	-0.2327	-0.167534	0.9827	0.982307	Bladder cancer	0.195827	0.392263	GCST90274797	10	71477178	0.0505	4.07e-06	10_71477178_A_G	13867	Interleukin-10 receptor subunit beta levels	0.00152906	0.00184115	25.5747	42.6787	21.2329
rs2266590	A	G	A	G	-0.4105	-0.0692182	0.5426	0.549108	Bladder cancer	0.0517014	0.180633	GCST90274797	21	34659396	0.0108	1e-300	21_34659396_A_G	14714	Interleukin-10 receptor subunit beta levels	0.0894182	0.0836435	1342.89	42.6787	1444.7
rs34361138	A	G	A	G	0.0532	-0.010139	0.5488	0.564396	Bladder cancer	0.052163	0.845886	GCST90274797	6	41174158	0.0113	2.5e-06	6_41174158_A_G	14732	Interleukin-10 receptor subunit beta levels	0.00150249	0.00140164	20.6751	42.6787	22.1649
rs4686528	A	G	A	G	-0.1435	-0.0322293	0.9488	0.963257	Bladder cancer	0.136325	0.813111	GCST90274797	3	189486023	0.0317	5.99e-06	3_189486023_A_G	14286	Interleukin-10 receptor subunit beta levels	0.00143256	0.00200068	28.6351	42.6787	20.492
rs55780441	T	C	T	C	0.1783	-0.0499863	0.9674	0.981323	Bladder cancer	0.191953	0.794548	GCST90274797	16	13209083	0.0348	3e-07	16_13209083_T_C	14734	Interleukin-10 receptor subunit beta levels	0.00177873	0.00200519	29.5999	42.6787	26.2509
rs6517157	T	C	T	C	0.1509	0.15628	0.9258	0.933821	Bladder cancer	0.104313	0.134085	GCST90274797	21	34634808	0.0251	1.83e-09	21_34634808_T_C	14286	Interleukin-10 receptor subunit beta levels	0.00252397	0.00312845	44.8271	42.6787	36.1436
rs6584485	T	C	T	C	0.0743	0.0268442	0.8362	0.850014	Bladder cancer	0.0724695	0.711069	GCST90274797	10	103937244	0.0161	3.93e-06	10_103937244_T_C	14286	Interleukin-10 receptor subunit beta levels	0.00148877	0.00151228	21.6341	42.6787	21.2974
rs75710908	A	G	A	G	0.1586	0.0661035	0.9665	0.974894	Bladder cancer	0.165618	0.689796	GCST90274797	21	34510084	0.0341	3.3e-06	21_34510084_A_G	14708	Interleukin-10 receptor subunit beta levels	0.00146881	0.00162886	23.9931	42.6787	21.632
rs7574167	A	G	A	G	0.0637	0.0648851	0.2684	0.249471	Bladder cancer	0.0609683	0.287219	GCST90274797	2	43150924	0.0135	2.38e-06	2_43150924_A_G	12832	Interleukin-10 receptor subunit beta levels	0.00173233	0.00159355	20.4778	42.6787	22.2644
rs7815666	T	C	T	C	0.0512	-0.0602159	0.5351	0.536872	Bladder cancer	0.0517146	0.244266	GCST90274797	8	18274205	0.0113	5.87e-06	8_18274205_T_C	14732	Interleukin-10 receptor subunit beta levels	0.00139179	0.00130426	19.2369	42.6787	20.5297
rs7855466	T	C	T	C	0.0861	0.00339199	0.1723	0.127492	Bladder cancer	0.0780825	0.96535	GCST90274797	9	136121303	0.0169	3.49e-07	9_136121303_T_C	11783	Interleukin-10 receptor subunit beta levels	0.00219834	0.00211444	24.963	42.6787	25.9557
rs8064909	T	C	T	C	-0.0608	-0.0805228	0.4413	0.447196	Bladder cancer	0.051613	0.11873	GCST90274797	17	74093726	0.0135	6.68e-06	17_74093726_T_C	10281	Interleukin-10 receptor subunit beta levels	0.00196939	0.00182285	18.7712	42.6787	20.2833
rs9685374	A	G	A	G	-0.0618	0.00547114	0.2721	0.260221	Bladder cancer	0.0594344	0.926656	GCST90274797	4	119751261	0.0134	3.99e-06	4_119751261_A_G	14286	Interleukin-10 receptor subunit beta levels	0.00148686	0.00151289	21.6429	42.6787	21.27
rs10043720	A	G	A	G	-0.4981	-0.00772821	0.3025	0.318766	Bladder cancer	0.055837	0.889919	GCST90274798	5	158767333	0.0132	1e-300	5_158767333_A_G	12402	Interleukin-12 subunit beta levels	0.103004	0.104697	1450.05	42.6787	1423.92
rs10769256	T	C	T	C	0.0585	-0.000639364	0.4	0.403123	Bladder cancer	0.0527453	0.990328	GCST90274798	11	47378396	0.0123	1.97e-06	11_47378396_T_C	14091	Interleukin-12 subunit beta levels	0.00160297	0.00164268	23.1818	42.6787	22.6205
rs10774625	A	G	A	G	0.131	-0.018678	0.49	0.496236	Bladder cancer	0.0513067	0.715824	GCST90274798	12	111910219	0.0131	1.52e-23	12_111910219_A_G	11784	Interleukin-12 subunit beta levels	0.00841609	0.00857707	101.929	42.6787	100
rs1110261	A	G	A	G	0.0843	-0.115927	0.2045	0.198844	Bladder cancer	0.0648836	0.0739875	GCST90274798	3	5019936	0.0148	1.23e-08	3_5019936_A_G	14287	Interleukin-12 subunit beta levels	0.00226603	0.00231216	33.1058	42.6787	32.4438
rs12588969	C	G	C	G	-0.1297	0.0692336	0.6875	0.684712	Bladder cancer	0.0553889	0.211316	GCST90274798	14	103230758	0.0127	1.74e-24	14_103230758_C_G	14287	Interleukin-12 subunit beta levels	0.00724825	0.00722824	104.007	42.6787	104.297
rs12639588	A	G	A	G	-0.2517	-0.0159438	0.5635	0.548245	Bladder cancer	0.0518061	0.758265	GCST90274798	3	188121263	0.0117	1.18e-102	3_188121263_A_G	14287	Interleukin-12 subunit beta levels	0.031381	0.0311655	459.521	42.6787	462.801
rs12766137	C	G	C	G	0.0709	-0.0225042	0.8109	0.822111	Bladder cancer	0.06731	0.738125	GCST90274798	10	94525783	0.0149	1.95e-06	10_94525783_C_G	14726	Interleukin-12 subunit beta levels	0.00153542	0.00154163	22.7341	42.6787	22.6423
rs142057772	A	G	A	G	-0.1893	-0.282311	0.03	0.0319454	Bladder cancer	0.146505	0.0539829	GCST90274798	12	17251217	0.0363	1.84e-07	12_17251217_A_G	14728	Interleukin-12 subunit beta levels	0.00184333	0.00208557	30.7763	42.6787	27.1949
rs148549227	T	C	T	C	0.1088	0.0909112	0.0889	0.0830886	Bladder cancer	0.093456	0.330668	GCST90274798	3	171348710	0.0228	1.82e-06	3_171348710_T_C	12403	Interleukin-12 subunit beta levels	0.00183288	0.00191759	23.8257	42.6787	22.7713
rs2249989	C	G	C	G	-0.0669	-0.038662	0.2514	0.244113	Bladder cancer	0.0599338	0.518877	GCST90274798	10	73105421	0.0138	1.25e-06	10_73105421_C_G	14286	Interleukin-12 subunit beta levels	0.00164259	0.0016846	24.1035	42.6787	23.5014
rs3130510	A	G	A	G	0.1155	-0.022106	0.2275	0.255178	Bladder cancer	0.0586894	0.706426	GCST90274798	6	31154493	0.014	1.58e-16	6_31154493_A_G	14735	Interleukin-12 subunit beta levels	0.00459849	0.00468893	69.4075	42.6787	68.0625
rs539598	T	C	T	C	-0.0672	0.0376011	0.2822	0.295992	Bladder cancer	0.056251	0.503845	GCST90274798	11	96026074	0.0129	1.9e-07	11_96026074_T_C	14731	Interleukin-12 subunit beta levels	0.00183902	0.00182949	26.9959	42.6787	27.1368
rs568297	T	C	T	C	-0.0699	-0.00442211	0.6522	0.641112	Bladder cancer	0.0534428	0.934055	GCST90274798	12	121221763	0.0122	1.01e-08	12_121221763_T_C	14725	Interleukin-12 subunit beta levels	0.0022247	0.00221664	32.7081	42.6787	32.8273
rs61938962	T	C	T	C	0.0713	-0.0923744	0.3226	0.34135	Bladder cancer	0.0543289	0.0890782	GCST90274798	12	56446766	0.0125	1.17e-08	12_56446766_T_C	14732	Interleukin-12 subunit beta levels	0.00220393	0.00222187	32.801	42.6787	32.5356
rs6870256	T	C	T	C	0.0725	0.00278361	0.5786	0.590165	Bladder cancer	0.0527853	0.957943	GCST90274798	5	158847071	0.0119	1.11e-09	5_158847071_T_C	14716	Interleukin-12 subunit beta levels	0.00251627	0.00256318	37.8115	42.6787	37.1178
rs6968201	T	G	T	G	-0.0622	0.109923	0.5425	0.52838	Bladder cancer	0.051549	0.0329742	GCST90274798	7	6408796	0.0119	1.72e-07	7_6408796_T_G	14287	Interleukin-12 subunit beta levels	0.00190887	0.00192044	27.4863	42.6787	27.3204
rs73416208	A	G	A	G	-0.1477	0.00627043	0.0654	0.0559202	Bladder cancer	0.11239	0.955508	GCST90274798	22	37881211	0.0246	1.92e-09	22_37881211_A_G	14729	Interleukin-12 subunit beta levels	0.00244183	0.00266682	39.3793	42.6787	36.0488
rs76428106	T	C	T	C	-0.3406	0.452524	0.9832	0.989317	Bladder cancer	0.250501	0.0708444	GCST90274798	13	28604007	0.0535	1.94e-10	13_28604007_T_C	13800	Interleukin-12 subunit beta levels	0.00292881	0.0038324	53.0828	42.6787	40.5305
rs8026767	A	G	A	G	-0.0743	0.0543227	0.2595	0.258172	Bladder cancer	0.0586607	0.354421	GCST90274798	15	80260554	0.0132	1.81e-08	15_80260554_A_G	14734	Interleukin-12 subunit beta levels	0.00214603	0.00212163	31.3223	42.6787	31.6833
rs911263	T	C	T	C	0.0781	0.100277	0.7185	0.716655	Bladder cancer	0.0569722	0.0783904	GCST90274798	14	68753593	0.0128	1.05e-09	14_68753593_T_C	14735	Interleukin-12 subunit beta levels	0.00252055	0.00246739	36.4419	42.6787	37.2291
rs10446322	A	G	A	G	0.064	-0.0625712	0.3961	0.42185	Bladder cancer	0.0525304	0.233597	GCST90274799	3	143068250	0.0132	1.24e-06	3_143068250_A_G	11777	Interleukin-13 levels	0.00199244	0.00195957	23.1192	42.6787	23.5078
rs10752781	T	G	T	G	0.0595	-0.0832147	0.4904	0.48632	Bladder cancer	0.0515908	0.10675	GCST90274799	1	234425332	0.0134	8.98e-06	1_234425332_T_G	11344	Interleukin-13 levels	0.00173532	0.00176947	20.1049	42.6787	19.7163
rs10893042	C	G	C	G	-0.0702	-0.146419	0.6744	0.663828	Bladder cancer	0.0550657	0.00783748	GCST90274799	11	123332970	0.015	2.87e-06	11_123332970_C_G	11344	Interleukin-13 levels	0.00192737	0.00216424	24.6001	42.6787	21.9024
rs10917637	A	G	A	G	0.0692	-0.0343967	0.3447	0.370717	Bladder cancer	0.0539904	0.524067	GCST90274799	1	162878651	0.0136	3.61e-07	1_162878651_A_G	11772	Interleukin-13 levels	0.00219484	0.00216333	25.5176	42.6787	25.8901
rs11251952	A	G	A	G	-0.1845	-0.173925	0.0751	0.0175382	Bladder cancer	0.195975	0.374819	GCST90274799	10	3623961	0.0397	3.36e-06	10_3623961_A_G	11344	Interleukin-13 levels	0.00190062	0.00472887	53.8897	42.6787	21.5979
rs117322078	T	C	T	C	0.2081	0.216304	0.9743	0.983516	Bladder cancer	0.20634	0.294504	GCST90274799	22	37976432	0.046	6.07e-06	22_37976432_T_C	11781	Interleukin-13 levels	0.00173447	0.0021687	25.6007	42.6787	20.4658
rs11757926	C	G	C	G	0.1458	0.0224947	0.9259	0.928261	Bladder cancer	0.0994727	0.821093	GCST90274799	6	41584211	0.0327	8.25e-06	6_41584211_C_G	7943	Interleukin-13 levels	0.00249723	0.00291694	23.2312	42.6787	19.8801
rs12146346	T	G	T	G	0.0734	-0.0108346	0.3902	0.397019	Bladder cancer	0.052543	0.836631	GCST90274799	10	53942324	0.0155	2.19e-06	10_53942324_T_G	8388	Interleukin-13 levels	0.00266694	0.00256388	21.5559	42.6787	22.4248
rs13021250	C	G	C	G	0.1112	-0.00638825	0.9154	0.92492	Bladder cancer	0.098522	0.948301	GCST90274799	2	8361137	0.0248	7.33e-06	2_8361137_C_G	10915	Interleukin-13 levels	0.00183892	0.00191523	20.941	42.6787	20.1051
rs13119159	A	G	A	G	0.0739	0.00135658	0.4958	0.495216	Bladder cancer	0.0513724	0.978933	GCST90274799	4	40938582	0.0132	2.16e-08	4_40938582_A_G	11344	Interleukin-13 levels	0.00275583	0.00273041	31.0531	42.6787	31.343
rs13297881	T	G	T	G	0.1562	0.067716	0.9494	0.964537	Bladder cancer	0.1411	0.631287	GCST90274799	9	4934758	0.035	8.09e-06	9_4934758_T_G	11344	Interleukin-13 levels	0.00175297	0.00234418	26.6502	42.6787	19.9171
rs141726773	T	C	T	C	0.2093	-0.247767	0.9682	0.982326	Bladder cancer	0.199249	0.213682	GCST90274799	13	41810092	0.0446	2.69e-06	13_41810092_T_C	11344	Interleukin-13 levels	0.00193792	0.00269749	30.6777	42.6787	22.0226
rs1472639	A	C	A	C	0.0677	-0.00399637	0.2405	0.21549	Bladder cancer	0.0626453	0.949135	GCST90274799	6	55271616	0.015	6.38e-06	6_55271616_A_C	11790	Interleukin-13 levels	0.00172506	0.00167436	19.7705	42.6787	20.3702
rs181829077	A	C	A	C	0.448	0.527882	0.9937	0.994463	Bladder cancer	0.345855	0.126932	GCST90274799	1	210429399	0.0997	7.01e-06	1_210429399_A_C	9956	Interleukin-13 levels	0.00202436	0.00251294	25.0768	42.6787	20.1914
rs183684201	C	G	C	G	-0.2968	0.425889	0.9858	0.99295	Bladder cancer	0.312684	0.173185	GCST90274799	5	9974643	0.0628	2.29e-06	5_9974643_C_G	11782	Interleukin-13 levels	0.00189252	0.00246624	29.1241	42.6787	22.3362
rs2073696	A	G	A	G	-0.0992	0.0457192	0.112	0.0826222	Bladder cancer	0.0959263	0.633641	GCST90274799	8	17271300	0.0219	5.91e-06	8_17271300_A_G	11782	Interleukin-13 levels	0.00173874	0.00195742	23.1036	42.6787	20.518
rs2485365	A	G	A	G	0.0579	-0.0409953	0.4703	0.462037	Bladder cancer	0.051515	0.426152	GCST90274799	6	159512373	0.0129	7.18e-06	6_159512373_A_G	11776	Interleukin-13 levels	0.00170809	0.00167029	19.6989	42.6787	20.1455
rs3119485	A	T	A	T	-0.1308	-0.0489426	0.094	0.0888772	Bladder cancer	0.0904736	0.588536	GCST90274799	21	14817382	0.0293	8.04e-06	21_14817382_A_T	7523	Interleukin-13 levels	0.00264275	0.00291408	21.9809	42.6787	19.9288
rs36038515	A	G	A	G	0.0892	0.0197449	0.1389	0.135304	Bladder cancer	0.0761822	0.795496	GCST90274799	3	8912627	0.0197	5.96e-06	3_8912627_A_G	11344	Interleukin-13 levels	0.00180436	0.00190334	21.6288	42.6787	20.502
rs36107074	T	C	T	C	-0.0706	0.0531674	0.2438	0.231303	Bladder cancer	0.0617621	0.389325	GCST90274799	11	11427220	0.0159	8.99e-06	11_11427220_T_C	11343	Interleukin-13 levels	0.00173544	0.00183785	20.8814	42.6787	19.7158
rs4260678	A	G	A	G	0.0713	0.0705435	0.7649	0.781481	Bladder cancer	0.0620578	0.255648	GCST90274799	5	33630839	0.016	8.34e-06	5_33630839_A_G	11786	Interleukin-13 levels	0.00168235	0.00182838	21.5851	42.6787	19.8582
rs4535095	T	C	T	C	0.0594	-0.0363508	0.5305	0.5364	Bladder cancer	0.052078	0.485173	GCST90274799	2	98857893	0.0134	9.3e-06	2_98857893_T_C	11344	Interleukin-13 levels	0.00172951	0.00175761	19.97	42.6787	19.65
rs55924857	T	C	T	C	-0.0934	-0.064434	0.8535	0.857462	Bladder cancer	0.0735843	0.381221	GCST90274799	15	57830694	0.0183	3.33e-07	15_57830694_T_C	11792	Interleukin-13 levels	0.00220455	0.00218155	25.7767	42.6787	26.049
rs5756680	T	C	T	C	0.0848	0.0635614	0.177	0.165499	Bladder cancer	0.0696122	0.361201	GCST90274799	22	37842933	0.0186	5.14e-06	22_37842933_T_C	9905	Interleukin-13 levels	0.00209454	0.00209505	20.7909	42.6787	20.7858
rs59235092	A	G	A	G	0.2122	0.000612219	0.0274	0.0209142	Bladder cancer	0.178925	0.99727	GCST90274799	16	79977921	0.0439	1.34e-06	16_79977921_A_G	11784	Interleukin-13 levels	0.00197917	0.00239997	28.3445	42.6787	23.3648
rs74647203	A	G	A	G	-0.2845	-0.489769	0.0136	0.0101019	Bladder cancer	0.256031	0.0557574	GCST90274799	6	16610802	0.0629	6.1e-06	6_16610802_A_G	11792	Interleukin-13 levels	0.00173219	0.00217163	25.6593	42.6787	20.458
rs76219628	A	G	A	G	0.169	0.200454	0.0397	0.0393449	Bladder cancer	0.132391	0.129998	GCST90274799	7	154418309	0.0357	2.2e-06	7_154418309_A_G	11344	Interleukin-13 levels	0.00197192	0.00217771	24.7535	42.6787	22.4097
rs909357	A	G	A	G	-0.1099	-0.187234	0.0772	0.0757613	Bladder cancer	0.0972222	0.0541246	GCST90274799	8	133902602	0.0247	8.61e-06	8_133902602_A_G	11777	Interleukin-13 levels	0.00167846	0.00172088	20.2983	42.6787	19.7971
rs9881117	A	G	A	G	-0.0656	0.177446	0.3094	0.286734	Bladder cancer	0.0575049	0.00203038	GCST90274799	3	123702960	0.0141	3.28e-06	3_123702960_A_G	11791	Interleukin-13 levels	0.00183272	0.00183901	21.7201	42.6787	21.6456
rs1004308	T	C	T	C	0.0727	-0.0380382	0.1931	0.192682	Bladder cancer	0.0654553	0.561151	GCST90274800	9	124977274	0.0162	7.2e-06	9_124977274_T_C	11783	Interleukin-15 receptor subunit alpha levels	0.00170653	0.00164703	19.4356	42.6787	20.139
rs117428573	A	C	A	C	-0.3132	0.111864	0.0119	0.0125883	Bladder cancer	0.226669	0.621651	GCST90274800	8	27696981	0.0684	4.67e-06	8_27696981_A_C	10857	Interleukin-15 receptor subunit alpha levels	0.00192781	0.00230686	25.0989	42.6787	20.9668
rs117484888	A	G	A	G	0.3794	0.309849	0.0158	0.00931032	Bladder cancer	0.270714	0.252389	GCST90274800	21	15303777	0.0799	2.05e-06	21_15303777_A_G	7423	Interleukin-15 receptor subunit alpha levels	0.00302915	0.00447677	33.3715	42.6787	22.5476
rs12570881	A	T	A	T	-0.0867	0.0373637	0.8028	0.82131	Bladder cancer	0.0694962	0.590828	GCST90274800	10	5815194	0.0174	6.27e-07	10_5815194_A_T	11344	Interleukin-15 receptor subunit alpha levels	0.00218424	0.00238003	27.0587	42.6787	24.8279
rs140982443	T	C	T	C	0.1794	-0.115415	0.963	0.978428	Bladder cancer	0.178526	0.517961	GCST90274800	19	14884642	0.0395	5.58e-06	19_14884642_T_C	9906	Interleukin-15 receptor subunit alpha levels	0.00207844	0.00229352	22.7673	42.6787	20.6277
rs142180961	T	C	T	C	0.2488	0.253049	0.0166	0.00893701	Bladder cancer	0.273512	0.35487	GCST90274800	12	38055500	0.0553	6.82e-06	12_38055500_T_C	10724	Interleukin-15 receptor subunit alpha levels	0.00188432	0.00202101	21.7132	42.6787	20.2419
rs145793996	A	G	A	G	-0.2278	0.211774	0.9801	0.982291	Bladder cancer	0.195326	0.278272	GCST90274800	11	37594094	0.0492	3.66e-06	11_37594094_A_G	11779	Interleukin-15 receptor subunit alpha levels	0.00181699	0.00202424	23.8878	42.6787	21.4377
rs17129907	A	G	A	G	-0.1381	-0.00127478	0.9503	0.95311	Bladder cancer	0.122044	0.991666	GCST90274800	11	97047987	0.0303	5.17e-06	11_97047987_A_G	11790	Interleukin-15 receptor subunit alpha levels	0.00175913	0.0018015	21.2744	42.6787	20.7731
rs17635883	A	G	A	G	0.0937	-0.130815	0.122	0.09742	Bladder cancer	0.0868861	0.132172	GCST90274800	7	51409710	0.0211	8.96e-06	7_51409710_A_G	11344	Interleukin-15 receptor subunit alpha levels	0.00173568	0.00188089	21.3733	42.6787	19.7203
rs2228059	T	G	T	G	0.3692	-0.0317727	0.5146	0.503184	Bladder cancer	0.0513465	0.536055	GCST90274800	10	6002368	0.0127	8.39e-186	10_6002368_T_G	11344	Interleukin-15 receptor subunit alpha levels	0.069345	0.0680962	828.784	42.6787	845.115
rs2836464	A	G	A	G	0.0796	-0.0213281	0.8384	0.829378	Bladder cancer	0.068097	0.754127	GCST90274800	21	39896592	0.0169	2.48e-06	21_39896592_A_G	11791	Interleukin-15 receptor subunit alpha levels	0.00187827	0.00171692	20.2755	42.6787	22.1847
rs4459616	T	C	T	C	0.14	-0.0443629	0.0658	0.0604555	Bladder cancer	0.107357	0.679441	GCST90274800	18	12175379	0.0294	1.92e-06	18_12175379_T_C	9899	Interleukin-15 receptor subunit alpha levels	0.00228593	0.00240964	23.9058	42.6787	22.6757
rs4772056	C	G	C	G	0.0894	-0.067196	0.8608	0.864566	Bladder cancer	0.07579	0.37529	GCST90274800	13	98893318	0.0197	5.68e-06	13_98893318_C_G	11344	Interleukin-15 receptor subunit alpha levels	0.00181245	0.00191534	21.7655	42.6787	20.5941
rs56240706	A	T	A	T	0.0919	0.0206413	0.8082	0.843023	Bladder cancer	0.0705291	0.769779	GCST90274800	4	20169693	0.0193	1.92e-06	4_20169693_A_T	8861	Interleukin-15 receptor subunit alpha levels	0.00255283	0.00261836	23.2569	42.6787	22.6734
rs62144964	A	G	A	G	0.0852	0.0554156	0.1223	0.123785	Bladder cancer	0.077754	0.476029	GCST90274800	2	31652761	0.019	7.32e-06	2_31652761_A_G	11782	Interleukin-15 receptor subunit alpha levels	0.00170406	0.00155841	18.3867	42.6787	20.1081
rs649129	T	C	T	C	-0.0726	0.0737786	0.2166	0.206839	Bladder cancer	0.0635724	0.245827	GCST90274800	9	136154304	0.0158	4.33e-06	9_136154304_T_C	10918	Interleukin-15 receptor subunit alpha levels	0.00193044	0.00178873	19.5608	42.6787	21.1134
rs6751509	T	C	T	C	0.0577	-0.00400374	0.3704	0.370334	Bladder cancer	0.0540566	0.940958	GCST90274800	2	52233445	0.0128	6.55e-06	2_52233445_T_C	11782	Interleukin-15 receptor subunit alpha levels	0.00172202	0.00155281	18.3205	42.6787	20.3204
rs679874	A	G	A	G	0.0629	-0.00920304	0.7114	0.731104	Bladder cancer	0.0580606	0.874057	GCST90274800	6	153065996	0.0139	6.03e-06	6_153065996_A_G	11779	Interleukin-15 receptor subunit alpha levels	0.00173573	0.00162458	19.1638	42.6787	20.4773
rs6845172	C	G	C	G	0.0778	-0.0165118	0.8203	0.81909	Bladder cancer	0.0671899	0.805878	GCST90274800	4	140657353	0.0162	1.57e-06	4_140657353_C_G	11772	Interleukin-15 receptor subunit alpha levels	0.0019557	0.00178447	21.0408	42.6787	23.0637
rs7137828	T	C	T	C	-0.0748	0.02098	0.5243	0.516302	Bladder cancer	0.0513661	0.68295	GCST90274800	12	111932800	0.0133	1.87e-08	12_111932800_T_C	11344	Interleukin-15 receptor subunit alpha levels	0.002781	0.00279091	31.7431	42.6787	31.6301
rs7898286	T	G	T	G	-0.1967	-0.0142469	0.3975	0.416176	Bladder cancer	0.0523725	0.785599	GCST90274800	10	6009462	0.0135	4.34e-48	10_6009462_T_G	11344	Interleukin-15 receptor subunit alpha levels	0.0183737	0.0185325	214.164	42.6787	212.296
rs79638163	T	G	T	G	0.176	0.0579063	0.9701	0.968384	Bladder cancer	0.145794	0.691236	GCST90274800	1	235799305	0.0398	9.77e-06	1_235799305_T_G	11792	Interleukin-15 receptor subunit alpha levels	0.00165587	0.00179698	21.2245	42.6787	19.5551
rs9270551	A	G	A	G	0.0749	-9.15e-06	0.7077	0.634369	Bladder cancer	0.0557459	0.999869	GCST90274800	6	32560501	0.0153	9.81e-07	6_32560501_A_G	11344	Interleukin-15 receptor subunit alpha levels	0.0021085	0.00232098	26.3858	42.6787	23.9652
rs115193412	T	C	T	C	0.1688	0.109993	0.0418	0.0312663	Bladder cancer	0.14731	0.45526	GCST90274801	3	63484616	0.0349	1.32e-06	3_63484616_T_C	11778	Interleukin-17A levels	0.0019826	0.00228248	26.94	42.6787	23.3934
rs12599620	T	C	T	C	-0.0726	-0.0395319	0.7391	0.759238	Bladder cancer	0.0602717	0.511892	GCST90274801	16	8011846	0.0153	2.08e-06	16_8011846_T_C	11336	Interleukin-17A levels	0.00198265	0.00203273	23.0859	42.6787	22.516
rs13092332	T	C	T	C	0.1668	0.218929	0.0383	0.0267663	Bladder cancer	0.162122	0.176887	GCST90274801	3	163713211	0.0373	7.75e-06	3_163713211_T_C	11776	Interleukin-17A levels	0.00169556	0.00204956	24.1811	42.6787	19.9974
rs145734140	A	G	A	G	-0.3662	-0.178854	0.985	0.99325	Bladder cancer	0.315355	0.570611	GCST90274801	8	82998811	0.0815	7.01e-06	8_82998811_A_G	8187	Interleukin-17A levels	0.00246055	0.00396273	32.564	42.6787	20.1893
rs1462017	C	G	C	G	-0.0893	0.0677633	0.1776	0.186912	Bladder cancer	0.0660875	0.305195	GCST90274801	8	70106392	0.017	1.5e-07	8_70106392_C_G	11774	Interleukin-17A levels	0.0023385	0.00232948	27.4867	42.6787	27.5934
rs17448036	A	G	A	G	-0.0585	-0.0826041	0.5609	0.568062	Bladder cancer	0.051898	0.11146	GCST90274801	3	189579511	0.0128	4.87e-06	3_189579511_A_G	11783	Interleukin-17A levels	0.00176987	0.00168574	19.8932	42.6787	20.8878
rs2429911	T	C	T	C	0.2309	0.0841712	0.0251	0.0208665	Bladder cancer	0.180681	0.641319	GCST90274801	17	2272057	0.0486	2.02e-06	17_2272057_T_C	11294	Interleukin-17A levels	0.00199497	0.00260923	29.5405	42.6787	22.5723
rs2731803	T	C	T	C	-0.0713	-0.0231836	0.3974	0.256303	Bladder cancer	0.0607069	0.70254	GCST90274801	5	17221637	0.0161	9.49e-06	5_17221637_T_C	11782	Interleukin-17A levels	0.00166211	0.00243481	28.7521	42.6787	19.6122
rs28852438	A	G	A	G	-0.068	-0.0688582	0.2897	0.282618	Bladder cancer	0.0578879	0.234239	GCST90274801	7	6380998	0.0148	4.34e-06	7_6380998_A_G	11336	Interleukin-17A levels	0.0018591	0.001903	21.6097	42.6787	21.1103
rs33998516	A	C	A	C	-0.0802	0.141018	0.7781	0.795832	Bladder cancer	0.0645477	0.02891	GCST90274801	1	96622380	0.0164	1.01e-06	1_96622380_A_C	11336	Interleukin-17A levels	0.00210553	0.00222112	25.2302	42.6787	23.9145
rs34557923	T	G	T	G	0.2446	-0.21729	0.9819	0.984059	Bladder cancer	0.203643	0.285965	GCST90274801	10	67955765	0.0517	2.23e-06	10_67955765_T_G	10913	Interleukin-17A levels	0.00204728	0.00212661	23.2529	42.6787	22.3837
rs3895928	T	C	T	C	-0.1893	-0.335506	0.9682	0.970583	Bladder cancer	0.152078	0.027374	GCST90274801	12	89686567	0.0418	5.93e-06	12_89686567_T_C	11783	Interleukin-17A levels	0.00173785	0.0022066	26.0534	42.6787	20.5092
rs41270871	A	T	A	T	0.0923	0.0249017	0.221	0.21731	Bladder cancer	0.0624482	0.690071	GCST90274801	6	32628224	0.0189	1.04e-06	6_32628224_A_T	8742	Interleukin-17A levels	0.00272135	0.00293334	25.7129	42.6787	23.8495
rs4877075	A	G	A	G	0.0908	-0.0956856	0.1411	0.14056	Bladder cancer	0.0738926	0.195345	GCST90274801	9	91976386	0.0192	2.25e-06	9_91976386_A_G	11336	Interleukin-17A levels	0.00196938	0.00199835	22.6946	42.6787	22.365
rs4985487	T	G	T	G	-0.0615	-0.0506307	0.6045	0.615538	Bladder cancer	0.0527465	0.337111	GCST90274801	16	70109850	0.0138	8.33e-06	16_70109850_T_G	11336	Interleukin-17A levels	0.00174924	0.00180852	20.5349	42.6787	19.8606
rs56702825	A	G	A	G	0.1383	-0.183995	0.9451	0.956001	Bladder cancer	0.125049	0.141189	GCST90274801	8	504034	0.0303	5.01e-06	8_504034_A_G	11766	Interleukin-17A levels	0.00176781	0.00198483	23.396	42.6787	20.8333
rs57876893	T	G	T	G	0.1915	-0.00735914	0.0279	0.019252	Bladder cancer	0.187403	0.968676	GCST90274801	14	23580861	0.043	8.45e-06	14_23580861_T_G	11776	Interleukin-17A levels	0.00168169	0.00198922	23.4678	42.6787	19.8336
rs75788494	T	C	T	C	-0.2432	-0.000457325	0.021	0.0213335	Bladder cancer	0.178727	0.997958	GCST90274801	2	13468626	0.0525	3.61e-06	2_13468626_T_C	10574	Interleukin-17A levels	0.00202568	0.00243197	25.7735	42.6787	21.459
rs77529534	T	C	T	C	-0.1279	-0.246249	0.9323	0.94691	Bladder cancer	0.114721	0.0318322	GCST90274801	9	27215497	0.0272	2.57e-06	9_27215497_T_C	11775	Interleukin-17A levels	0.00187457	0.00206498	24.3613	42.6787	22.1107
rs77595989	T	G	T	G	0.1696	-0.18738	0.9648	0.971186	Bladder cancer	0.154693	0.225781	GCST90274801	12	118130693	0.0371	4.84e-06	12_118130693_T_G	11767	Interleukin-17A levels	0.00177313	0.00195372	23.0305	42.6787	20.898
rs79982350	C	G	C	G	-0.1467	-0.0269183	0.0555	0.0466111	Bladder cancer	0.122774	0.826454	GCST90274801	9	31560030	0.0295	6.6e-07	9_31560030_C_G	11336	Interleukin-17A levels	0.00217714	0.00225624	25.63	42.6787	24.7295
rs10870773	A	G	A	G	-0.0816	-0.0385636	0.8025	0.839456	Bladder cancer	0.0701416	0.582459	GCST90274802	13	44396409	0.0171	1.82e-06	13_44396409_A_G	11345	Interleukin-17C levels	0.0020035	0.00211068	23.9921	42.6787	22.7713
rs113334480	T	C	T	C	-0.0962	0.0293513	0.8992	0.910246	Bladder cancer	0.0901632	0.744776	GCST90274802	3	184205438	0.0217	9.29e-06	3_184205438_T_C	11788	Interleukin-17C levels	0.00166472	0.00167763	19.8058	42.6787	19.6531
rs113702571	T	C	T	C	-0.2558	-0.359268	0.9848	0.985326	Bladder cancer	0.214379	0.0937663	GCST90274802	8	118629302	0.0564	5.75e-06	8_118629302_T_C	11786	Interleukin-17C levels	0.00174258	0.00195895	23.1295	42.6787	20.5704
rs114882743	A	T	A	T	-0.3259	0.165786	0.9804	0.985095	Bladder cancer	0.211939	0.434076	GCST90274802	1	176930254	0.0548	2.73e-09	1_176930254_A_T	11345	Interleukin-17C levels	0.00310833	0.00408186	46.4903	42.6787	35.3678
rs11931996	T	C	T	C	-0.1219	-0.0987609	0.9068	0.942843	Bladder cancer	0.116	0.394556	GCST90274802	4	152291909	0.0262	3.28e-06	4_152291909_T_C	11345	Interleukin-17C levels	0.0019048	0.00251168	28.5618	42.6787	21.6474
rs12092228	T	G	T	G	0.1508	-0.0546027	0.0512	0.0492882	Bladder cancer	0.118713	0.645548	GCST90274802	1	242536005	0.0327	4e-06	1_242536005_T_G	9892	Interleukin-17C levels	0.00214574	0.00220942	21.8995	42.6787	21.267
rs12445031	C	G	C	G	-0.09	0.0132042	0.1382	0.14559	Bladder cancer	0.072828	0.856127	GCST90274802	16	76626873	0.0195	3.92e-06	16_76626873_C_G	11339	Interleukin-17C levels	0.00187544	0.00192943	21.9163	42.6787	21.3018
rs12863903	T	C	T	C	-0.0857	0.040117	0.1597	0.156583	Bladder cancer	0.0706027	0.569894	GCST90274802	13	96638651	0.018	1.93e-06	13_96638651_T_C	11345	Interleukin-17C levels	0.00199444	0.0019712	22.4035	42.6787	22.6682
rs12895022	T	C	T	C	0.1091	-0.118514	0.0906	0.0851948	Bladder cancer	0.0922415	0.198855	GCST90274802	14	102333234	0.0236	3.78e-06	14_102333234_T_C	11774	Interleukin-17C levels	0.00181212	0.00196138	23.1348	42.6787	21.371
rs139152046	T	G	T	G	-0.2421	-0.159011	0.0211	0.0269938	Bladder cancer	0.155697	0.307121	GCST90274802	12	23245149	0.0536	6.28e-06	12_23245149_T_G	9422	Interleukin-17C levels	0.00216107	0.00242125	22.8636	42.6787	20.4014
rs139637682	T	C	T	C	-0.3301	-0.148752	0.9817	0.990785	Bladder cancer	0.26944	0.580894	GCST90274802	2	111999407	0.0737	7.5e-06	2_111999407_T_C	8488	Interleukin-17C levels	0.00235846	0.00391517	33.3547	42.6787	20.0612
rs149756404	A	C	A	C	-0.2749	0.161147	0.9809	0.978785	Bladder cancer	0.17871	0.367206	GCST90274802	2	239715033	0.0524	1.55e-07	2_239715033_A_C	11302	Interleukin-17C levels	0.0024297	0.00283164	32.0884	42.6787	27.5224
rs17700884	T	G	T	G	-0.105	0.0840836	0.3783	0.359241	Bladder cancer	0.0538307	0.118288	GCST90274802	16	88684495	0.0136	1.16e-14	16_88684495_T_G	11775	Interleukin-17C levels	0.00503756	0.00518592	61.3721	42.6787	59.6075
rs1920106	T	C	T	C	0.0633	-0.00343799	0.3948	0.401352	Bladder cancer	0.0528141	0.948098	GCST90274802	7	21240100	0.0132	1.62e-06	7_21240100_T_C	11792	Interleukin-17C levels	0.0019467	0.00191476	22.6183	42.6787	22.9964
rs2584966	T	C	T	C	0.0625	-0.0771822	0.4639	0.460663	Bladder cancer	0.0515401	0.134258	GCST90274802	2	117363487	0.0139	6.91e-06	2_117363487_T_C	9906	Interleukin-17C levels	0.0020372	0.00194294	19.2804	42.6787	20.2176
rs2770113	A	G	A	G	0.0604	0.0537947	0.4998	0.495993	Bladder cancer	0.051432	0.29559	GCST90274802	6	158194819	0.0135	7.67e-06	6_158194819_A_G	11345	Interleukin-17C levels	0.00176162	0.00182408	20.7283	42.6787	20.0173
rs2814092	C	G	C	G	0.0624	0.105022	0.6437	0.651519	Bladder cancer	0.0542074	0.0526963	GCST90274802	6	66547346	0.0135	3.8e-06	6_66547346_C_G	11792	Interleukin-17C levels	0.00180885	0.00178607	21.0954	42.6787	21.3649
rs28552890	A	T	A	T	-0.096	0.0689794	0.8859	0.890886	Bladder cancer	0.0829365	0.405571	GCST90274802	8	23691952	0.0215	8e-06	8_23691952_A_T	11345	Interleukin-17C levels	0.00175459	0.00186313	21.1729	42.6787	19.9373
rs39779	C	G	C	G	0.1077	-0.0890607	0.1032	0.0838144	Bladder cancer	0.0929095	0.337773	GCST90274802	16	8393906	0.0227	2.09e-06	16_8393906_C_G	11345	Interleukin-17C levels	0.00198057	0.00214702	24.4061	42.6787	22.5102
rs4593271	A	G	A	G	-0.0793	-0.0409096	0.6301	0.642366	Bladder cancer	0.0552025	0.458644	GCST90274802	5	19253845	0.0167	2.05e-06	5_19253845_A_G	7943	Interleukin-17C levels	0.00283144	0.00293137	23.3464	42.6787	22.5483
rs541607428	A	G	A	G	0.3402	-0.0876937	0.0121	0.00961211	Bladder cancer	0.266773	0.742368	GCST90274802	1	86710244	0.0755	6.61e-06	1_86710244_A_G	7902	Interleukin-17C levels	0.0025635	0.00276692	21.9193	42.6787	20.3037
rs554604740	A	G	A	G	0.1926	-0.0454258	0.0286	0.0272203	Bladder cancer	0.159374	0.775624	GCST90274802	12	52750252	0.0401	1.56e-06	12_52750252_A_G	11149	Interleukin-17C levels	0.00206523	0.00206114	23.0229	42.6787	23.0687
rs59356989	A	G	A	G	-0.0882	0.0961332	0.8432	0.841773	Bladder cancer	0.0705637	0.173084	GCST90274802	5	107423766	0.0177	6.26e-07	5_107423766_A_G	11790	Interleukin-17C levels	0.00210202	0.00205704	24.2984	42.6787	24.8308
rs6874610	T	G	T	G	-0.0649	0.0121638	0.2795	0.295999	Bladder cancer	0.0563271	0.829027	GCST90274802	5	39436460	0.0144	6.58e-06	5_39436460_T_G	11783	Interleukin-17C levels	0.00172121	0.00169643	20.0196	42.6787	20.3125
rs72815428	T	C	T	C	-0.1673	-0.12871	0.0423	0.0390893	Bladder cancer	0.132545	0.331516	GCST90274802	5	174836306	0.0366	4.85e-06	5_174836306_T_C	11775	Interleukin-17C levels	0.00177163	0.00226773	26.7587	42.6787	20.8944
rs73181003	A	G	A	G	-0.1122	0.050039	0.093	0.0903791	Bladder cancer	0.0901612	0.578898	GCST90274802	22	46922217	0.0246	5.09e-06	22_46922217_A_G	11345	Interleukin-17C levels	0.00183059	0.00212376	24.1411	42.6787	20.8025
rs7324443	C	G	C	G	0.0637	0.077811	0.3575	0.357958	Bladder cancer	0.0539544	0.149257	GCST90274802	13	30065064	0.014	5.36e-06	13_30065064_C_G	11345	Interleukin-17C levels	0.00182181	0.00186405	21.1834	42.6787	20.7025
rs75246422	T	C	T	C	-0.0951	0.118566	0.1233	0.117065	Bladder cancer	0.080752	0.142028	GCST90274802	5	174179760	0.0201	2.23e-06	5_174179760_T_C	11793	Interleukin-17C levels	0.00189494	0.00195526	23.0997	42.6787	22.3856
rs75360344	A	G	A	G	-0.1414	0.122068	0.0498	0.0436782	Bladder cancer	0.125718	0.331566	GCST90274802	7	35414652	0.031	5.08e-06	7_35414652_A_G	11774	Interleukin-17C levels	0.00176424	0.00189223	22.3175	42.6787	20.8054
rs7559734	T	C	T	C	-0.0915	-0.139331	0.8803	0.889978	Bladder cancer	0.0825448	0.0914219	GCST90274802	2	212465664	0.0206	8.92e-06	2_212465664_T_C	11345	Interleukin-17C levels	0.0017363	0.0017644	20.049	42.6787	19.7291
rs77223587	T	G	T	G	-0.3175	-0.0195937	0.9893	0.991002	Bladder cancer	0.271568	0.942482	GCST90274802	15	46123423	0.0705	6.68e-06	15_46123423_T_G	10324	Interleukin-17C levels	0.00196107	0.00213417	22.076	42.6787	20.2819
rs77654242	T	G	T	G	-0.2174	0.0341382	0.9707	0.980961	Bladder cancer	0.191402	0.858442	GCST90274802	2	136675328	0.0469	3.56e-06	2_136675328_T_G	10294	Interleukin-17C levels	0.00208338	0.00268845	27.7441	42.6787	21.4869
rs78289993	A	G	A	G	0.1577	-0.142814	0.961	0.964865	Bladder cancer	0.139671	0.306543	GCST90274802	8	14156196	0.0351	7.03e-06	8_14156196_A_G	11785	Interleukin-17C levels	0.00171021	0.00186415	22.0063	42.6787	20.1859
rs79340054	T	C	T	C	0.138	-0.0736748	0.9508	0.956154	Bladder cancer	0.125789	0.558076	GCST90274802	10	19368604	0.0309	7.97e-06	10_19368604_T_C	11780	Interleukin-17C levels	0.00169058	0.00178173	21.0227	42.6787	19.9453
rs79599491	T	C	T	C	-0.1905	0.173077	0.9711	0.970171	Bladder cancer	0.150847	0.25123	GCST90274802	15	42484321	0.0419	5.45e-06	15_42484321_T_C	11306	Interleukin-17C levels	0.00182531	0.00203696	23.0728	42.6787	20.671
rs8015296	C	G	C	G	-0.1162	-0.070399	0.0991	0.0836551	Bladder cancer	0.0958989	0.46289	GCST90274802	14	92763907	0.0253	4.37e-06	14_92763907_C_G	9461	Interleukin-17C levels	0.00222515	0.00241097	22.8605	42.6787	21.0946
rs112338272	A	C	A	C	-0.1954	-0.134168	0.0236	0.0228297	Bladder cancer	0.172435	0.436521	GCST90274803	9	20069041	0.0425	4.27e-06	9_20069041_A_C	14721	Interleukin-18 levels	0.00143407	0.00175962	25.9455	42.6787	21.1384
rs113552426	C	G	C	G	-0.278	0.282197	0.9792	0.989862	Bladder cancer	0.258689	0.275328	GCST90274803	16	84730435	0.0581	1.71e-06	16_84730435_C_G	11249	Interleukin-18 levels	0.0020315	0.00314814	35.519	42.6787	22.8948
rs113841145	A	G	A	G	0.2866	0.0385298	0.9893	0.989975	Bladder cancer	0.25511	0.87995	GCST90274803	11	116331456	0.0629	5.2e-06	11_116331456_A_G	13809	Interleukin-18 levels	0.00150141	0.00173898	24.0519	42.6787	20.7611
rs115120333	T	C	T	C	-0.1967	-0.0924259	0.9795	0.980314	Bladder cancer	0.183864	0.615186	GCST90274803	1	78975194	0.0443	8.99e-06	1_78975194_T_C	14743	Interleukin-18 levels	0.00133565	0.00155381	22.9403	42.6787	19.7152
rs11605127	C	G	C	G	-0.0629	-0.0147544	0.7543	0.755989	Bladder cancer	0.0598386	0.805241	GCST90274803	11	268430	0.0137	4.41e-06	11_268430_C_G	14730	Interleukin-18 levels	0.00142921	0.00146649	21.6303	42.6787	21.0795
rs11918804	A	C	A	C	-0.1184	0.106286	0.9337	0.939071	Bladder cancer	0.107805	0.324177	GCST90274803	3	196038580	0.0266	8.54e-06	3_196038580_A_C	11791	Interleukin-18 levels	0.00167778	0.00173562	20.4968	42.6787	19.8125
rs12201187	A	T	A	T	0.0676	0.0149444	0.2767	0.241252	Bladder cancer	0.0602978	0.804256	GCST90274803	6	162785078	0.0138	9.65e-07	6_162785078_A_T	13245	Interleukin-18 levels	0.00180868	0.00182916	24.2679	42.6787	23.9958
rs12648080	A	G	A	G	0.072	-0.0869299	0.8077	0.809921	Bladder cancer	0.0656754	0.185626	GCST90274803	4	121893301	0.0146	8.16e-07	4_121893301_A_G	14743	Interleukin-18 levels	0.00164709	0.00161037	23.7767	42.6787	24.3198
rs12681624	C	G	C	G	-0.0935	0.0386989	0.8179	0.845081	Bladder cancer	0.0710421	0.585938	GCST90274803	8	144606172	0.0157	2.59e-09	8_144606172_C_G	13657	Interleukin-18 levels	0.00259063	0.00260413	35.6523	42.6787	35.467
rs12711729	T	C	T	C	-0.0702	-0.0123519	0.7336	0.765839	Bladder cancer	0.0612931	0.84029	GCST90274803	2	126751021	0.0153	4.47e-06	2_126751021_T_C	11345	Interleukin-18 levels	0.0018525	0.00192618	21.8909	42.6787	21.0519
rs139760701	A	T	A	T	-0.3049	0.011004	0.989	0.98864	Bladder cancer	0.242977	0.963877	GCST90274803	3	115001900	0.0604	4.46e-07	3_115001900_A_T	13809	Interleukin-18 levels	0.00184222	0.00202271	27.9842	42.6787	25.4824
rs1403742	A	T	A	T	-0.0567	0.0187787	0.371	0.35515	Bladder cancer	0.0546607	0.731185	GCST90274803	20	51289816	0.0124	4.82e-06	20_51289816_A_T	14296	Interleukin-18 levels	0.00146061	0.00150045	21.4796	42.6787	20.9085
rs144626837	T	C	T	C	0.2026	-0.0754307	0.9792	0.976356	Bladder cancer	0.169975	0.657205	GCST90274803	2	125030834	0.0458	9.71e-06	2_125030834_T_C	14741	Interleukin-18 levels	0.00132588	0.00167203	24.6853	42.6787	19.5681
rs148504635	A	C	A	C	0.2532	-0.0896495	0.9857	0.990502	Bladder cancer	0.263491	0.733678	GCST90274803	16	54161464	0.0525	1.42e-06	16_54161464_A_C	14737	Interleukin-18 levels	0.00157606	0.00180733	26.6793	42.6787	23.26
rs17229943	A	C	A	C	-0.16	-0.0256884	0.9351	0.949117	Bladder cancer	0.116983	0.82619	GCST90274803	5	68682536	0.0267	2.07e-09	5_68682536_A_C	14744	Interleukin-18 levels	0.00242999	0.00310722	45.9495	42.6787	35.9102
rs2108621	T	C	T	C	0.0581	0.0906537	0.3565	0.359179	Bladder cancer	0.0540319	0.0933897	GCST90274803	19	5344989	0.0126	4.01e-06	19_5344989_T_C	14296	Interleukin-18 levels	0.00148529	0.00154878	22.1726	42.6787	21.2623
rs35495214	T	C	T	C	0.1374	0.149028	0.0465	0.0488481	Bladder cancer	0.118955	0.210274	GCST90274803	11	112433719	0.0291	2.34e-06	11_112433719_T_C	14735	Interleukin-18 levels	0.00151091	0.00167408	24.7056	42.6787	22.294
rs35656694	A	C	A	C	0.0746	-0.125035	0.851	0.852125	Bladder cancer	0.0723914	0.0841289	GCST90274803	16	52032393	0.0165	6.15e-06	16_52032393_A_C	14744	Interleukin-18 levels	0.00138469	0.00141131	20.835	42.6787	20.4414
rs385076	T	C	T	C	-0.1857	0.046671	0.3734	0.354402	Bladder cancer	0.054122	0.388506	GCST90274803	2	32489851	0.0123	1.68e-51	2_32489851_T_C	14296	Interleukin-18 levels	0.015696	0.0161368	234.443	42.6787	227.936
rs4140444	A	G	A	G	0.2157	-0.210518	0.0204	0.0125214	Bladder cancer	0.232653	0.36554	GCST90274803	6	38300402	0.0461	2.88e-06	6_38300402_A_G	14741	Interleukin-18 levels	0.00148315	0.00185956	27.4591	42.6787	21.8927
rs4612182	A	G	A	G	-0.0547	0.0697541	0.5914	0.600247	Bladder cancer	0.0532316	0.190065	GCST90274803	6	138336137	0.0123	8.7e-06	6_138336137_A_G	14743	Interleukin-18 levels	0.00133985	0.00144605	21.3471	42.6787	19.7772
rs56266057	T	G	T	G	0.0796	-0.0491503	0.8662	0.851876	Bladder cancer	0.0724247	0.497366	GCST90274803	10	17082153	0.018	9.77e-06	10_17082153_T_G	14295	Interleukin-18 levels	0.00136636	0.00146869	21.0229	42.6787	19.556
rs56836641	T	C	T	C	-0.163	0.0353472	0.0477	0.0369751	Bladder cancer	0.136318	0.795404	GCST90274803	7	155637974	0.0301	6.12e-08	7_155637974_T_C	14743	Interleukin-18 levels	0.00198542	0.00241378	35.6676	42.6787	29.3253
rs5744249	A	C	A	C	0.2039	-0.0875134	0.7618	0.743145	Bladder cancer	0.0587228	0.136151	GCST90274803	11	112025306	0.0135	1.53e-51	11_112025306_A_C	14742	Interleukin-18 levels	0.0152405	0.0150885	225.812	42.6787	228.122
rs57954386	C	G	C	G	-0.1248	-0.00791544	0.0665	0.0711806	Bladder cancer	0.100083	0.936962	GCST90274803	11	86686181	0.0259	1.45e-06	11_86686181_C_G	12201	Interleukin-18 levels	0.00189968	0.00193373	23.6352	42.6787	23.2183
rs60235102	T	C	T	C	0.1154	0.03702	0.9237	0.933351	Bladder cancer	0.102998	0.719279	GCST90274803	11	105060888	0.0225	2.91e-07	11_105060888_T_C	14722	Interleukin-18 levels	0.00178387	0.00187714	27.6835	42.6787	26.3055
rs62351325	T	C	T	C	0.1557	0.150241	0.9627	0.954964	Bladder cancer	0.123716	0.224596	GCST90274803	5	19698240	0.0344	6.01e-06	5_19698240_T_C	14744	Interleukin-18 levels	0.00138772	0.00174103	25.7111	42.6787	20.4861
rs72766437	T	C	T	C	0.0637	-0.0595399	0.2088	0.202516	Bladder cancer	0.0639363	0.351731	GCST90274803	5	83710370	0.0143	8.41e-06	5_83710370_T_C	14734	Interleukin-18 levels	0.00134512	0.00134068	19.7774	42.6787	19.843
rs77994606	A	G	A	G	-0.2314	-0.264048	0.9814	0.983573	Bladder cancer	0.203618	0.194706	GCST90274803	18	28763724	0.0472	9.46e-07	18_28763724_A_G	14743	Interleukin-18 levels	0.00162783	0.00195486	28.873	42.6787	24.0349
rs7990672	T	G	T	G	-0.0568	0.0351438	0.69	0.684382	Bladder cancer	0.0553224	0.525263	GCST90274803	13	90838056	0.0128	9.1e-06	13_90838056_T_G	14295	Interleukin-18 levels	0.0013758	0.00138018	19.7543	42.6787	19.6914
rs10171395	A	C	A	C	0.0912	0.0803559	0.1155	0.0867357	Bladder cancer	0.0914425	0.379532	GCST90274804	2	104750692	0.019	1.59e-06	2_104750692_A_C	14295	interleukin-18 receptor 1 levels	0.00160938	0.00169941	24.3311	42.6787	23.04
rs117195704	A	G	A	G	-0.1505	0.188288	0.0389	0.0386066	Bladder cancer	0.132786	0.156196	GCST90274804	10	61379709	0.0313	1.52e-06	10_61379709_A_G	14730	interleukin-18 receptor 1 levels	0.00156733	0.00169364	24.9863	42.6787	23.1198
rs117524772	A	C	A	C	0.2911	0.0350823	0.0232	0.0265138	Bladder cancer	0.159441	0.825846	GCST90274804	17	64361924	0.0451	1.09e-10	17_64361924_A_C	14295	interleukin-18 receptor 1 levels	0.00290632	0.00384068	55.1065	42.6787	41.6612
rs1812326	T	C	T	C	0.2401	0.0907684	0.3831	0.366405	Bladder cancer	0.0533848	0.0890809	GCST90274804	2	102860411	0.0117	1.39e-93	2_102860411_T_C	14737	interleukin-18 receptor 1 levels	0.0277859	0.0272484	412.752	42.6787	421.127
rs35021151	A	G	A	G	-0.1646	0.113016	0.0317	0.0302361	Bladder cancer	0.150179	0.451725	GCST90274804	3	58414784	0.0342	1.49e-06	3_58414784_A_G	14735	interleukin-18 receptor 1 levels	0.00156976	0.00166325	24.5456	42.6787	23.1637
rs35679975	T	C	T	C	0.0726	0.0925433	0.8161	0.808989	Bladder cancer	0.0654823	0.15758	GCST90274804	20	51194941	0.0149	1.1e-06	20_51194941_T_C	14726	interleukin-18 receptor 1 levels	0.00160981	0.00158208	23.3315	42.6787	23.7411
rs62257659	A	G	A	G	-0.2015	0.0286561	0.9745	0.970594	Bladder cancer	0.151659	0.850131	GCST90274804	3	79589418	0.042	1.61e-06	3_79589418_A_G	14727	interleukin-18 receptor 1 levels	0.00156069	0.00201791	29.7738	42.6787	23.0171
rs7149605	A	G	A	G	0.1075	0.14498	0.0957	0.0899142	Bladder cancer	0.0905914	0.109516	GCST90274804	14	94854041	0.0203	1.19e-07	14_94854041_A_G	14731	interleukin-18 receptor 1 levels	0.00190032	0.00200019	29.5199	42.6787	28.043
rs78199195	A	G	A	G	-0.0956	0.123658	0.8928	0.892255	Bladder cancer	0.0830581	0.136538	GCST90274804	3	146882115	0.0196	1.07e-06	3_146882115_A_G	14295	interleukin-18 receptor 1 levels	0.00166172	0.00174942	25.0483	42.6787	23.7905
rs10063171	T	G	T	G	0.0775	-0.0459778	0.1932	0.183807	Bladder cancer	0.0672141	0.493943	GCST90274805	5	67352803	0.0175	9.49e-06	5_67352803_T_G	11340	Interleukin-1-alpha levels	0.00172679	0.00187243	21.2695	42.6787	19.6122
rs10233998	T	G	T	G	0.131	0.102437	0.0604	0.0594492	Bladder cancer	0.108978	0.347229	GCST90274805	7	89060931	0.0286	4.64e-06	7_89060931_T_G	11785	Interleukin-1-alpha levels	0.00177739	0.00194784	22.9962	42.6787	20.9802
rs115494443	A	G	A	G	0.2658	-0.400245	0.0186	0.0121603	Bladder cancer	0.236598	0.0907097	GCST90274805	1	116784131	0.0565	2.55e-06	1_116784131_A_G	10853	Interleukin-1-alpha levels	0.00203544	0.00257928	28.0602	42.6787	22.1316
rs115602471	T	C	T	C	0.2215	-0.262261	0.0311	0.0237406	Bladder cancer	0.168799	0.120259	GCST90274805	2	170964850	0.0469	2.33e-06	2_170964850_T_C	11340	Interleukin-1-alpha levels	0.00196341	0.00295677	33.6232	42.6787	22.305
rs117537822	T	C	T	C	0.2176	-0.050868	0.9755	0.97741	Bladder cancer	0.172867	0.768558	GCST90274805	17	32073614	0.0439	7.17e-07	17_32073614_T_C	11788	Interleukin-1-alpha levels	0.00208026	0.00226329	26.7357	42.6787	24.5691
rs11759846	A	G	A	G	-0.3263	-0.0753472	0.0799	0.0452377	Bladder cancer	0.124648	0.545525	GCST90274805	6	32586222	0.0266	1.36e-34	6_32586222_A_G	11788	Interleukin-1-alpha levels	0.0126065	0.0156547	187.441	42.6787	150.477
rs11878153	A	G	A	G	0.1116	-0.111533	0.9015	0.914151	Bladder cancer	0.0913678	0.2222	GCST90274805	18	308555	0.0221	4.42e-07	18_308555_A_G	11787	Interleukin-1-alpha levels	0.00215911	0.00221187	26.1247	42.6787	25.5002
rs12047801	T	C	T	C	0.0783	-0.0422488	0.174	0.169157	Bladder cancer	0.068618	0.538086	GCST90274805	1	105113404	0.0171	4.67e-06	1_105113404_T_C	11785	Interleukin-1-alpha levels	0.00177625	0.00176231	20.802	42.6787	20.9668
rs12529944	T	C	T	C	-0.0845	0.0552189	0.178	0.181106	Bladder cancer	0.0687948	0.422171	GCST90274805	6	84066908	0.0189	7.79e-06	6_84066908_T_C	11340	Interleukin-1-alpha levels	0.0017599	0.00208947	23.74	42.6787	19.9889
rs16886503	A	T	A	T	0.2438	-0.0280744	0.9824	0.983459	Bladder cancer	0.200608	0.888702	GCST90274805	8	89744017	0.0524	3.28e-06	8_89744017_A_T	11786	Interleukin-1-alpha levels	0.00183364	0.00205541	24.2708	42.6787	21.6474
rs190042298	A	G	A	G	0.1502	-0.058956	0.0497	0.0497453	Bladder cancer	0.118671	0.619328	GCST90274805	3	147628690	0.0339	9.39e-06	3_147628690_A_G	9897	Interleukin-1-alpha levels	0.00197999	0.00213102	21.1314	42.6787	19.6309
rs2426634	A	G	A	G	-0.0896	-0.0583559	0.1376	0.143867	Bladder cancer	0.0740291	0.430531	GCST90274805	20	55282711	0.0198	6.03e-06	20_55282711_A_G	11787	Interleukin-1-alpha levels	0.00173461	0.00190534	22.4973	42.6787	20.4779
rs4767214	T	C	T	C	0.062	-0.0876468	0.5326	0.513383	Bladder cancer	0.0515596	0.0891475	GCST90274805	12	114539621	0.013	1.85e-06	12_114539621_T_C	11772	Interleukin-1-alpha levels	0.00192878	0.00191383	22.569	42.6787	22.7456
rs523604	A	G	A	G	0.0754	0.00119287	0.5264	0.526557	Bladder cancer	0.0522208	0.981776	GCST90274805	11	118755738	0.0142	1.1e-07	11_118755738_A_G	10290	Interleukin-1-alpha levels	0.00273304	0.00283466	29.2458	42.6787	28.1946
rs547199103	A	T	A	T	-0.3452	0.020724	0.0283	0.0112245	Bladder cancer	0.246223	0.932923	GCST90274805	6	32606006	0.0647	9.53e-08	6_32606006_A_T	7943	Interleukin-1-alpha levels	0.00357194	0.00655375	52.3867	42.6787	28.4664
rs61098036	A	G	A	G	-0.0856	0.0290345	0.8232	0.836243	Bladder cancer	0.0713876	0.684216	GCST90274805	17	53509585	0.0187	4.7e-06	17_53509585_A_G	9891	Interleukin-1-alpha levels	0.00211443	0.00213287	21.1371	42.6787	20.9539
rs6702801	C	G	C	G	-0.077	-0.0128073	0.6598	0.669997	Bladder cancer	0.0568876	0.821876	GCST90274805	1	89516076	0.0171	6.7e-06	1_89516076_C_G	7943	Interleukin-1-alpha levels	0.00254687	0.00266169	21.1929	42.6787	20.2763
rs7138836	A	T	A	T	-0.0982	0.0958334	0.1141	0.0961854	Bladder cancer	0.0875463	0.273666	GCST90274805	12	103893601	0.0207	2.1e-06	12_103893601_A_T	11775	Interleukin-1-alpha levels	0.00190795	0.0019495	22.9963	42.6787	22.5052
rs72937918	T	C	T	C	-0.2056	0.105203	0.0233	0.0249404	Bladder cancer	0.164526	0.522545	GCST90274805	11	80672314	0.0452	5.4e-06	11_80672314_T_C	11772	Interleukin-1-alpha levels	0.00175481	0.00192395	22.6885	42.6787	20.6904
rs76012752	A	G	A	G	0.1568	-0.0654422	0.9527	0.967304	Bladder cancer	0.146254	0.654545	GCST90274805	12	28953348	0.0352	8.41e-06	12_28953348_A_G	11340	Interleukin-1-alpha levels	0.00174707	0.00221585	25.179	42.6787	19.843
rs76544453	T	C	T	C	-0.1609	-0.153989	0.9585	0.959689	Bladder cancer	0.129981	0.236134	GCST90274805	14	81651382	0.0361	8.31e-06	14_81651382_T_C	11788	Interleukin-1-alpha levels	0.00168267	0.0020596	24.3245	42.6787	19.8654
rs78267257	A	G	A	G	-0.1825	0.0686906	0.0323	0.033511	Bladder cancer	0.144661	0.634902	GCST90274805	14	83490781	0.0406	6.95e-06	14_83490781_A_G	10903	Interleukin-1-alpha levels	0.00185013	0.00208209	22.7442	42.6787	20.2057
rs10996419	T	C	T	C	-0.1222	-0.0557889	0.9188	0.945326	Bladder cancer	0.113151	0.621978	GCST90274806	10	67202938	0.0259	2.38e-06	10_67202938_T_C	11784	Interleukin-2 levels	0.00188584	0.00222818	26.311	42.6787	22.2609
rs111783480	A	G	A	G	-0.1462	-0.0967399	0.1075	0.0145517	Bladder cancer	0.214439	0.651897	GCST90274806	4	14756774	0.0329	8.84e-06	4_14756774_A_G	9265	Interleukin-2 levels	0.00212729	0.00410149	38.1485	42.6787	19.7471
rs142641125	T	C	T	C	0.2095	-0.114129	0.0287	0.0201443	Bladder cancer	0.183367	0.533675	GCST90274806	3	12396234	0.0419	5.73e-07	3_12396234_T_C	11789	Interleukin-2 levels	0.00211649	0.002447	28.9135	42.6787	25
rs1657222	A	G	A	G	-0.0621	-0.0396776	0.4037	0.395155	Bladder cancer	0.0528105	0.45246	GCST90274806	10	34837139	0.0137	5.82e-06	10_34837139_A_G	11340	Interleukin-2 levels	0.00180892	0.00185668	21.0902	42.6787	20.5467
rs1671226	C	G	C	G	-0.0849	-0.0391671	0.2053	0.216096	Bladder cancer	0.0630464	0.53444	GCST90274806	19	55502846	0.017	5.91e-07	19_55502846_C_G	11341	Interleukin-2 levels	0.00219477	0.002352	26.7322	42.6787	24.9412
rs1943222	A	G	A	G	-0.0622	0.0230814	0.6878	0.688244	Bladder cancer	0.0562997	0.681825	GCST90274806	18	58028057	0.0138	6.57e-06	18_58028057_A_G	11789	Interleukin-2 levels	0.00172057	0.00166152	19.6169	42.6787	20.3153
rs201229721	A	C	A	C	-0.1468	0.00527648	0.9396	0.943474	Bladder cancer	0.111565	0.962278	GCST90274806	9	88775115	0.0309	2.03e-06	9_88775115_A_C	9257	Interleukin-2 levels	0.00243277	0.00244603	22.6935	42.6787	22.5702
rs28515912	A	C	A	C	-0.0723	-0.0584503	0.6969	0.707678	Bladder cancer	0.0573493	0.308109	GCST90274806	17	103299	0.0149	1.22e-06	17_103299_A_C	10723	Interleukin-2 levels	0.00219137	0.00220833	23.7279	42.6787	23.5453
rs36006983	T	C	T	C	-0.0728	-0.00875501	0.7384	0.722589	Bladder cancer	0.0572798	0.878519	GCST90274806	16	77431739	0.0153	1.95e-06	16_77431739_T_C	11341	Interleukin-2 levels	0.00199269	0.00204749	23.2641	42.6787	22.6402
rs4703508	T	C	T	C	-0.1216	-0.066356	0.9334	0.926938	Bladder cancer	0.0989939	0.502665	GCST90274806	5	35188802	0.026	2.91e-06	5_35188802_T_C	11789	Interleukin-2 levels	0.0018523	0.0018384	21.7091	42.6787	21.8736
rs6535212	T	G	T	G	-0.0646	0.05413	0.6861	0.685887	Bladder cancer	0.0552595	0.327303	GCST90274806	4	138235156	0.0139	3.36e-06	4_138235156_T_G	11784	Interleukin-2 levels	0.00182987	0.00179752	21.2165	42.6787	21.5991
rs72659067	A	G	A	G	0.3327	0.306649	0.0111	0.00742161	Bladder cancer	0.296079	0.300342	GCST90274806	8	62639773	0.0736	6.17e-06	8_62639773_A_G	9980	Interleukin-2 levels	0.0020437	0.00243003	24.3059	42.6787	20.4338
rs74852566	T	G	T	G	-0.1999	-0.069277	0.0244	0.0195191	Bladder cancer	0.187582	0.711893	GCST90274806	10	2293803	0.0431	3.52e-06	10_2293803_T_G	11789	Interleukin-2 levels	0.0018217	0.00190247	22.4671	42.6787	21.5115
rs75739108	T	C	T	C	0.1737	-0.186087	0.039	0.0277398	Bladder cancer	0.158231	0.239575	GCST90274806	3	137247468	0.038	4.85e-06	3_137247468_T_C	11341	Interleukin-2 levels	0.00183932	0.00226161	25.7025	42.6787	20.8945
rs7638939	A	T	A	T	0.0854	0.00668872	0.8293	0.827344	Bladder cancer	0.0693174	0.923128	GCST90274806	3	125991040	0.0174	9.2e-07	3_125991040_A_T	11769	Interleukin-2 levels	0.00204298	0.00206486	24.3475	42.6787	24.0889
rs77832761	A	G	A	G	0.1922	-0.059321	0.0318	0.0251582	Bladder cancer	0.164581	0.71852	GCST90274806	13	85868678	0.0414	3.44e-06	13_85868678_A_G	11785	Interleukin-2 levels	0.00182581	0.00227473	26.8642	42.6787	21.5529
rs77853517	T	C	T	C	-0.1048	-0.0731408	0.8961	0.911239	Bladder cancer	0.0903083	0.417997	GCST90274806	3	64865615	0.0217	1.37e-06	3_64865615_T_C	11787	Interleukin-2 levels	0.00197522	0.00204515	24.1515	42.6787	23.324
rs77880908	T	C	T	C	-0.0886	-0.0400411	0.1258	0.101661	Bladder cancer	0.0853432	0.638943	GCST90274806	4	47700645	0.0196	6.17e-06	4_47700645_T_C	11770	Interleukin-2 levels	0.0017334	0.00172659	20.3536	42.6787	20.4341
rs79419497	A	G	A	G	0.2016	-0.305106	0.9733	0.973084	Bladder cancer	0.158901	0.0548454	GCST90274806	2	192579384	0.0424	1.99e-06	2_192579384_A_G	11789	Interleukin-2 levels	0.00191432	0.00211237	24.9512	42.6787	22.6073
rs79925007	T	G	T	G	0.1176	-0.0680683	0.9036	0.905067	Bladder cancer	0.0877696	0.438024	GCST90274806	4	34713434	0.0255	3.99e-06	4_34713434_T_G	11341	Interleukin-2 levels	0.00187217	0.00240934	27.3855	42.6787	21.2684
rs112421516	A	G	A	G	0.1935	-0.17369	0.9708	0.973013	Bladder cancer	0.16019	0.278243	GCST90274807	1	67400701	0.0435	8.66e-06	1_67400701_A_G	11336	Interleukin-20 levels	0.00174278	0.00212278	24.1107	42.6787	19.7872
rs114209791	A	G	A	G	-0.2134	0.116903	0.9756	0.976483	Bladder cancer	0.169443	0.49024	GCST90274807	2	52215130	0.046	3.5e-06	2_52215130_A_G	11784	Interleukin-20 levels	0.00182331	0.00216811	25.6001	42.6787	21.5215
rs114363239	T	C	T	C	-0.2372	0.400433	0.0189	0.0185465	Bladder cancer	0.190587	0.0356366	GCST90274807	1	41433965	0.0487	1.11e-06	1_41433965_T_C	11782	Interleukin-20 levels	0.0020098	0.00208658	24.6313	42.6787	23.7231
rs115191082	T	G	T	G	-0.2543	-0.465518	0.0149	0.0111074	Bladder cancer	0.246482	0.0589384	GCST90274807	1	104640701	0.0561	5.82e-06	1_104640701_T_G	11294	Interleukin-20 levels	0.00181638	0.00189841	21.4776	42.6787	20.5479
rs117977288	T	G	T	G	-0.1546	0.209251	0.9553	0.949707	Bladder cancer	0.116942	0.0735583	GCST90274807	16	80689313	0.0316	9.96e-07	16_80689313_T_G	11784	Interleukin-20 levels	0.00202742	0.00204125	24.0992	42.6787	23.9356
rs12498781	A	G	A	G	0.0635	0.0919315	0.3202	0.331642	Bladder cancer	0.0546424	0.0924874	GCST90274807	4	133183457	0.0137	3.57e-06	4_133183457_A_G	11763	Interleukin-20 levels	0.00182335	0.00175542	20.6817	42.6787	21.4836
rs12969831	A	G	A	G	0.1474	0.191096	0.9399	0.951573	Bladder cancer	0.12266	0.11925	GCST90274807	18	74247282	0.0331	8.46e-06	18_74247282_A_G	11336	Interleukin-20 levels	0.00174661	0.0024546	27.8889	42.6787	19.8307
rs13421547	T	C	T	C	0.147	-0.189749	0.044	0.029953	Bladder cancer	0.151133	0.209292	GCST90274807	2	13940522	0.0325	6.09e-06	2_13940522_T_C	11784	Interleukin-20 levels	0.00173339	0.00181792	21.4578	42.6787	20.4582
rs138771212	A	G	A	G	-0.3596	-0.410467	0.9909	0.991544	Bladder cancer	0.280603	0.143521	GCST90274807	8	68839107	0.0778	3.8e-06	8_68839107_A_G	11336	Interleukin-20 levels	0.00188139	0.00233206	26.4934	42.6787	21.3639
rs143181662	T	C	T	C	0.0719	-0.0217272	0.5043	0.498717	Bladder cancer	0.052974	0.681697	GCST90274807	7	17753237	0.0156	4.05e-06	7_17753237_T_C	8587	Interleukin-20 levels	0.00246828	0.00258461	22.2464	42.6787	21.2426
rs143409618	T	C	T	C	-0.2247	-0.340115	0.0541	0.00701951	Bladder cancer	0.310123	0.272767	GCST90274807	13	112575760	0.0504	8.26e-06	13_112575760_T_C	11784	Interleukin-20 levels	0.0016842	0.00516748	61.1995	42.6787	19.8767
rs146918864	T	C	T	C	-0.2551	0.124571	0.0228	0.0112138	Bladder cancer	0.244943	0.611052	GCST90274807	2	141913966	0.0515	7.29e-07	2_141913966_T_C	11438	Interleukin-20 levels	0.00214093	0.00289981	33.2586	42.6787	24.5362
rs188205021	T	C	T	C	-0.222	0.183541	0.0255	0.0256386	Bladder cancer	0.162589	0.258954	GCST90274807	11	100596026	0.0427	2e-07	11_100596026_T_C	11774	Interleukin-20 levels	0.00229089	0.00244939	28.905	42.6787	27.0303
rs2285212	T	C	T	C	-0.1112	0.0473972	0.9158	0.927219	Bladder cancer	0.0995028	0.633832	GCST90274807	1	169461481	0.0248	7.33e-06	1_169461481_T_C	11336	Interleukin-20 levels	0.00177073	0.00190701	21.6553	42.6787	20.1051
rs28542561	T	C	T	C	-0.1753	-0.0612076	0.965	0.96734	Bladder cancer	0.145193	0.673345	GCST90274807	15	23769949	0.0372	2.45e-06	15_23769949_T_C	11774	Interleukin-20 levels	0.00188282	0.00207582	24.4874	42.6787	22.2064
rs34172193	A	G	A	G	-0.2175	0.0388933	0.02	0.0207177	Bladder cancer	0.182514	0.831251	GCST90274807	6	112451601	0.0488	8.31e-06	6_112451601_A_G	10918	Interleukin-20 levels	0.00181646	0.0018544	20.2803	42.6787	19.8646
rs34691354	C	G	C	G	0.0651	0.0771645	0.6659	0.669729	Bladder cancer	0.0546846	0.15822	GCST90274807	18	75094435	0.0143	5.3e-06	18_75094435_C_G	11336	Interleukin-20 levels	0.00182521	0.00188572	21.4131	42.6787	20.7248
rs35508685	T	C	T	C	0.1688	0.107411	0.9672	0.962974	Bladder cancer	0.13528	0.427202	GCST90274807	2	213241261	0.0373	6.03e-06	2_213241261_T_C	11782	Interleukin-20 levels	0.00173551	0.00180786	21.3352	42.6787	20.4799
rs383039	A	G	A	G	-0.0698	0.0386759	0.2136	0.230645	Bladder cancer	0.0611718	0.527223	GCST90274807	1	242399370	0.0156	7.66e-06	1_242399370_A_G	11783	Interleukin-20 levels	0.00169645	0.00163676	19.3143	42.6787	20.0199
rs61992201	T	G	T	G	0.0888	-0.0171647	0.1397	0.132124	Bladder cancer	0.0763392	0.822098	GCST90274807	14	48507353	0.0201	9.97e-06	14_48507353_T_G	10267	Interleukin-20 levels	0.0018978	0.00189541	19.4933	42.6787	19.5179
rs72633862	T	G	T	G	-0.1722	0.278389	0.0444	0.0290626	Bladder cancer	0.151887	0.0668226	GCST90274807	1	9746065	0.0376	4.65e-06	1_9746065_T_G	11774	Interleukin-20 levels	0.00177856	0.00251626	29.6961	42.6787	20.9745
rs72659995	T	C	T	C	-0.1232	-0.0640845	0.9142	0.935711	Bladder cancer	0.108236	0.553796	GCST90274807	14	21169862	0.0267	3.95e-06	14_21169862_T_C	11336	Interleukin-20 levels	0.001875	0.00238111	27.0519	42.6787	21.2911
rs73192044	A	G	A	G	-0.1066	-0.112047	0.9032	0.904039	Bladder cancer	0.0877663	0.201724	GCST90274807	3	119431497	0.0237	6.86e-06	3_119431497_A_G	11336	Interleukin-20 levels	0.0017818	0.00198703	22.5658	42.6787	20.231
rs113105910	A	G	A	G	-0.2425	-0.13614	0.0165	0.0126278	Bladder cancer	0.228069	0.55056	GCST90274808	11	5315973	0.0538	6.56e-06	11_5315973_A_G	11786	Interleukin-20 receptor subunit alpha levels	0.00172115	0.00190859	22.5338	42.6787	20.317
rs113153423	A	G	A	G	0.1913	-0.105517	0.972	0.968077	Bladder cancer	0.146787	0.472237	GCST90274808	8	139987300	0.0407	2.6e-06	8_139987300_A_G	11792	Interleukin-20 receptor subunit alpha levels	0.00187031	0.00199198	23.5323	42.6787	22.0923
rs113563938	A	T	A	T	0.3176	0.318254	0.9871	0.99038	Bladder cancer	0.264101	0.228185	GCST90274808	7	12560554	0.0676	2.62e-06	7_12560554_A_T	11344	Interleukin-20 receptor subunit alpha levels	0.00194238	0.00256887	29.2111	42.6787	22.0733
rs115680168	T	C	T	C	-0.3364	0.0636067	0.0177	0.00813752	Bladder cancer	0.286857	0.824519	GCST90274808	4	164735206	0.0757	8.84e-06	4_164735206_T_C	7586	Interleukin-20 receptor subunit alpha levels	0.00259712	0.00393513	29.962	42.6787	19.7479
rs11987533	A	G	A	G	0.1171	0.000382721	0.1374	0.133287	Bladder cancer	0.0758437	0.995974	GCST90274808	8	35154239	0.0198	3.34e-09	8_35154239_A_G	11344	Interleukin-20 receptor subunit alpha levels	0.00307437	0.00325042	36.9865	42.6787	34.9771
rs12056343	T	G	T	G	-0.0761	0.0662204	0.7494	0.752956	Bladder cancer	0.0612457	0.279597	GCST90274808	8	79840734	0.0166	4.55e-06	8_79840734_T_G	9894	Interleukin-20 receptor subunit alpha levels	0.00212006	0.00217517	21.5637	42.6787	21.0161
rs12138611	C	G	C	G	0.119	0.144878	0.1039	0.0752397	Bladder cancer	0.101157	0.152082	GCST90274808	1	168180874	0.0256	3.34e-06	1_168180874_C_G	11344	Interleukin-20 receptor subunit alpha levels	0.00190151	0.00263691	29.987	42.6787	21.608
rs143067549	T	C	T	C	-0.4166	-0.0501661	0.0114	0.00688637	Bladder cancer	0.309909	0.871405	GCST90274808	5	46131995	0.091	4.69e-06	5_46131995_T_C	7315	Interleukin-20 receptor subunit alpha levels	0.0028577	0.00391196	28.7205	42.6787	20.9583
rs145607970	A	C	A	C	-0.2162	0.33138	0.0367	0.0251035	Bladder cancer	0.166334	0.0463429	GCST90274808	6	32624017	0.048	6.66e-06	6_32624017_A_C	7523	Interleukin-20 receptor subunit alpha levels	0.00269019	0.00330498	24.9392	42.6787	20.2875
rs149111746	A	G	A	G	0.2357	-0.248095	0.0208	0.0148107	Bladder cancer	0.212915	0.243925	GCST90274808	17	59389022	0.0511	3.98e-06	17_59389022_A_G	11783	Interleukin-20 receptor subunit alpha levels	0.00180265	0.002263	26.7208	42.6787	21.2754
rs188200783	T	C	T	C	-0.2004	-0.0868766	0.0429	0.0263431	Bladder cancer	0.164042	0.59639	GCST90274808	5	22203180	0.0449	8.07e-06	5_22203180_T_C	8974	Interleukin-20 receptor subunit alpha levels	0.00221539	0.00329792	29.6868	42.6787	19.9206
rs2064077	T	C	T	C	0.1072	0.101399	0.083	0.0728445	Bladder cancer	0.0989284	0.305374	GCST90274808	1	171216897	0.0241	8.66e-06	1_171216897_T_C	11790	Interleukin-20 receptor subunit alpha levels	0.00167566	0.00174931	20.657	42.6787	19.7859
rs2883991	T	C	T	C	0.08	-0.00589478	0.8477	0.860295	Bladder cancer	0.0743416	0.936799	GCST90274808	2	53038599	0.0181	9.88e-06	2_53038599_T_C	11789	Interleukin-20 receptor subunit alpha levels	0.00165463	0.00165254	19.5107	42.6787	19.5354
rs4667792	T	C	T	C	-0.0606	0.0264206	0.5471	0.540002	Bladder cancer	0.0525092	0.61485	GCST90274808	2	166018354	0.0135	7.16e-06	2_166018354_T_C	11344	Interleukin-20 receptor subunit alpha levels	0.00177344	0.00181989	20.6788	42.6787	20.1501
rs540645152	A	C	A	C	-0.0817	0.0406481	0.4221	0.425665	Bladder cancer	0.052965	0.442812	GCST90274808	1	153082377	0.0155	1.36e-07	1_153082377_A_C	8814	Interleukin-20 receptor subunit alpha levels	0.00314296	0.00325643	28.7894	42.6787	27.7831
rs544388667	A	G	A	G	0.3626	0.451842	0.0114	0.00709049	Bladder cancer	0.302437	0.135175	GCST90274808	3	113013852	0.075	1.33e-06	3_113013852_A_G	9261	Interleukin-20 receptor subunit alpha levels	0.00251811	0.00296354	27.521	42.6787	23.374
rs59446445	A	G	A	G	0.1741	0.117047	0.0321	0.0298752	Bladder cancer	0.151774	0.440594	GCST90274808	5	154577444	0.038	4.61e-06	5_154577444_A_G	11790	Interleukin-20 receptor subunit alpha levels	0.00177753	0.00188349	22.2445	42.6787	20.9909
rs6920753	A	G	A	G	-0.0664	0.0767144	0.704	0.697589	Bladder cancer	0.0560377	0.171006	GCST90274808	6	158071161	0.0144	4.01e-06	6_158071161_A_G	11762	Interleukin-20 receptor subunit alpha levels	0.00180476	0.00183751	21.6489	42.6787	21.2623
rs72785422	T	C	T	C	0.0897	-0.0722418	0.8313	0.86363	Bladder cancer	0.077488	0.351183	GCST90274808	16	14288564	0.0195	4.22e-06	16_14288564_T_C	11343	Interleukin-20 receptor subunit alpha levels	0.00186232	0.00225677	25.6519	42.6787	21.16
rs74032581	A	T	A	T	-0.1343	-0.246376	0.9366	0.941674	Bladder cancer	0.110011	0.0251191	GCST90274808	16	83519341	0.0298	6.58e-06	16_83519341_A_T	11344	Interleukin-20 receptor subunit alpha levels	0.00178753	0.00214203	24.347	42.6787	20.3104
rs9817113	T	C	T	C	0.1541	0.132036	0.0446	0.0404428	Bladder cancer	0.129638	0.308443	GCST90274808	3	151178393	0.0346	8.44e-06	3_151178393_T_C	11790	Interleukin-20 receptor subunit alpha levels	0.0016799	0.00202374	23.9043	42.6787	19.836
rs114416525	A	G	A	G	0.2819	0.106425	0.0142	0.0128882	Bladder cancer	0.225813	0.63743	GCST90274809	3	99744651	0.0619	5.26e-06	3_99744651_A_G	11345	Interleukin-22 receptor subunit alpha-1 levels	0.0018251	0.00222483	25.2925	42.6787	20.74
rs11607326	A	T	A	T	-0.0919	0.0534608	0.1246	0.126119	Bladder cancer	0.0776832	0.491333	GCST90274809	11	83564435	0.0206	8.15e-06	11_83564435_A_T	11345	Interleukin-22 receptor subunit alpha-1 levels	0.00175149	0.00184241	20.937	42.6787	19.902
rs117263973	A	G	A	G	0.3467	-0.311481	0.0109	0.00746279	Bladder cancer	0.296251	0.293071	GCST90274809	21	42295154	0.0752	4.02e-06	21_42295154_A_G	10858	Interleukin-22 receptor subunit alpha-1 levels	0.00195413	0.00259182	28.2099	42.6787	21.2555
rs117636462	A	G	A	G	0.3671	-0.0840764	0.9915	0.992484	Bladder cancer	0.301802	0.780566	GCST90274809	20	16761823	0.0828	9.27e-06	20_16761823_A_G	10858	Interleukin-22 receptor subunit alpha-1 levels	0.00180739	0.00227149	24.7154	42.6787	19.6566
rs11777386	A	G	A	G	-0.1003	-0.0659887	0.0953	0.0915682	Bladder cancer	0.0894476	0.460675	GCST90274809	8	52767675	0.0224	7.55e-06	8_52767675_A_G	11779	Interleukin-22 receptor subunit alpha-1 levels	0.00169954	0.00173472	20.4653	42.6787	20.0496
rs12240324	A	G	A	G	0.2203	-0.125761	0.9713	0.988103	Bladder cancer	0.238821	0.598477	GCST90274809	10	44669337	0.047	2.77e-06	10_44669337_A_G	11793	Interleukin-22 receptor subunit alpha-1 levels	0.00185983	0.00270579	31.9905	42.6787	21.9702
rs13169282	A	G	A	G	-0.0709	0.0379315	0.2216	0.210557	Bladder cancer	0.0632553	0.548735	GCST90274809	5	144256718	0.0158	7.21e-06	5_144256718_A_G	11783	Interleukin-22 receptor subunit alpha-1 levels	0.0017063	0.00173418	20.4659	42.6787	20.1362
rs13257574	T	C	T	C	0.2714	-0.0952894	0.0167	0.0144732	Bladder cancer	0.215285	0.658041	GCST90274809	8	87485765	0.0584	3.36e-06	8_87485765_T_C	11306	Interleukin-22 receptor subunit alpha-1 levels	0.00190692	0.00241909	27.4117	42.6787	21.597
rs143949731	T	C	T	C	0.1655	0.36902	0.0384	0.0311454	Bladder cancer	0.148393	0.0128907	GCST90274809	18	22333712	0.0366	6.13e-06	18_22333712_T_C	11782	Interleukin-22 receptor subunit alpha-1 levels	0.00173275	0.00202279	23.8768	42.6787	20.4472
rs1473089	A	C	A	C	0.2679	0.84693	0.0253	0.0110537	Bladder cancer	0.258819	0.00106679	GCST90274809	4	26143082	0.0561	1.79e-06	4_26143082_A_C	10916	Interleukin-22 receptor subunit alpha-1 levels	0.00208511	0.0035397	38.7696	42.6787	22.8045
rs17256492	T	C	T	C	-0.0751	0.0359759	0.7694	0.773131	Bladder cancer	0.06177	0.560286	GCST90274809	14	62394907	0.0162	3.56e-06	14_62394907_T_C	11345	Interleukin-22 receptor subunit alpha-1 levels	0.00189104	0.00200134	22.7467	42.6787	21.4907
rs187651556	T	C	T	C	-0.3827	-0.082457	0.9838	0.993384	Bladder cancer	0.315889	0.794068	GCST90274809	1	29484787	0.0859	8.38e-06	1_29484787_T_C	6752	Interleukin-22 receptor subunit alpha-1 levels	0.00293192	0.00466841	31.6595	42.6787	19.8486
rs3181361	T	C	T	C	0.27	-0.050814	0.0163	0.0153764	Bladder cancer	0.2097	0.808534	GCST90274809	9	117667449	0.0582	3.5e-06	9_117667449_T_C	11345	Interleukin-22 receptor subunit alpha-1 levels	0.00189378	0.0023378	26.5798	42.6787	21.5219
rs369913010	T	C	T	C	-0.2141	-0.13349	0.0264	0.0196898	Bladder cancer	0.18771	0.476991	GCST90274809	12	131925456	0.0484	9.71e-06	12_131925456_T_C	9246	Interleukin-22 receptor subunit alpha-1 levels	0.00211234	0.00235639	21.834	42.6787	19.5678
rs4466	A	G	A	G	0.0906	0.0890654	0.1324	0.125253	Bladder cancer	0.0779864	0.253428	GCST90274809	22	35723831	0.0203	8.08e-06	22_35723831_A_G	11792	Interleukin-22 receptor subunit alpha-1 levels	0.00168662	0.00188579	22.2755	42.6787	19.9189
rs4811167	T	C	T	C	0.0632	-0.0752899	0.5504	0.545416	Bladder cancer	0.0515968	0.144511	GCST90274809	20	50001752	0.0134	2.4e-06	20_50001752_T_C	11793	Interleukin-22 receptor subunit alpha-1 levels	0.00188302	0.00197683	23.3549	42.6787	22.2446
rs56282088	A	G	A	G	0.2815	0.134833	0.0165	0.0163066	Bladder cancer	0.203207	0.506995	GCST90274809	8	81502336	0.0571	8.23e-07	8_81502336_A_G	10919	Interleukin-22 receptor subunit alpha-1 levels	0.00222134	0.00257185	28.1492	42.6787	24.3044
rs7158900	A	G	A	G	-0.0674	-0.0682679	0.6092	0.611713	Bladder cancer	0.0527892	0.195935	GCST90274809	14	94197473	0.0138	1.04e-06	14_94197473_A_G	11344	Interleukin-22 receptor subunit alpha-1 levels	0.00209874	0.00216304	24.5864	42.6787	23.854
rs75590335	A	G	A	G	0.1722	-0.0356778	0.0376	0.0371887	Bladder cancer	0.135284	0.791992	GCST90274809	4	157031745	0.037	3.25e-06	4_157031745_A_G	11345	Interleukin-22 receptor subunit alpha-1 levels	0.00190593	0.00214605	24.395	42.6787	21.6602
rs78594373	T	C	T	C	-0.1271	0.109344	0.0671	0.0710596	Bladder cancer	0.100421	0.276215	GCST90274809	2	85320044	0.0273	3.23e-06	2_85320044_T_C	11767	Interleukin-22 receptor subunit alpha-1 levels	0.00183897	0.00202245	23.8424	42.6787	21.6753
rs79229049	A	T	A	T	-0.2102	0.0200215	0.9695	0.970765	Bladder cancer	0.153827	0.896443	GCST90274809	7	81154741	0.0412	3.36e-07	7_81154741_A_T	11781	Interleukin-22 receptor subunit alpha-1 levels	0.00220498	0.00261302	30.8594	42.6787	26.0298
rs11066309	A	G	A	G	0.0655	0.00316812	0.4172	0.408084	Bladder cancer	0.0523268	0.951722	GCST90274810	12	112883476	0.0137	1.74e-06	12_112883476_A_G	11336	Interleukin-24 levels	0.00201272	0.0020863	23.6955	42.6787	22.8582
rs11256610	A	G	A	G	0.3005	0.162096	0.0145	0.0102349	Bladder cancer	0.255425	0.525682	GCST90274810	10	6122343	0.0641	2.76e-06	10_6122343_A_G	10850	Interleukin-24 levels	0.00202183	0.00258074	28.0683	42.6787	21.9772
rs117613902	A	G	A	G	-0.3	0.269672	0.9862	0.989262	Bladder cancer	0.248798	0.278408	GCST90274810	14	97741799	0.0657	4.97e-06	14_97741799_A_G	10850	Interleukin-24 levels	0.00191835	0.00244972	26.6398	42.6787	20.8503
rs12275648	T	C	T	C	-0.0696	-0.0512348	0.3114	0.334915	Bladder cancer	0.05452	0.34735	GCST90274810	11	129057999	0.0155	7.11e-06	11_129057999_T_C	10277	Interleukin-24 levels	0.00195849	0.00207747	21.3904	42.6787	20.163
rs12588414	A	G	A	G	0.0753	0.0513836	0.2361	0.237593	Bladder cancer	0.0603908	0.394851	GCST90274810	14	104576816	0.0169	8.37e-06	14_104576816_A_G	10273	Interleukin-24 levels	0.00192915	0.00204528	21.0501	42.6787	19.8526
rs143986178	A	G	A	G	0.2969	0.091815	0.0144	0.011363	Bladder cancer	0.241346	0.703627	GCST90274810	21	26067535	0.0644	4.02e-06	21_26067535_A_G	10850	Interleukin-24 levels	0.00195546	0.00250215	27.2114	42.6787	21.2544
rs145295031	A	T	A	T	0.3063	0.191729	0.014	0.0154102	Bladder cancer	0.208266	0.357261	GCST90274810	7	9959098	0.0647	2.2e-06	7_9959098_A_T	11287	Interleukin-24 levels	0.00198209	0.00259017	29.306	42.6787	22.4122
rs145450029	T	G	T	G	-0.2153	0.20739	0.0246	0.0152117	Bladder cancer	0.213159	0.330584	GCST90274810	11	76932037	0.0484	8.65e-06	11_76932037_T_G	11784	Interleukin-24 levels	0.00167668	0.00222452	26.2677	42.6787	19.7878
rs145660089	T	C	T	C	0.2004	0.119024	0.0274	0.0270953	Bladder cancer	0.159356	0.455118	GCST90274810	11	94477313	0.0446	7.01e-06	11_94477313_T_C	11779	Interleukin-24 levels	0.00171138	0.00214048	25.2625	42.6787	20.1895
rs145891540	T	G	T	G	0.1913	0.166236	0.0315	0.0276889	Bladder cancer	0.157768	0.292032	GCST90274810	12	93849398	0.0422	5.81e-06	12_93849398_T_G	11772	Interleukin-24 levels	0.00174289	0.0022329	26.3401	42.6787	20.5497
rs167018	A	G	A	G	0.0657	-0.0875767	0.4443	0.42905	Bladder cancer	0.0526805	0.09643	GCST90274810	7	155623090	0.0136	1.36e-06	7_155623090_A_G	11336	Interleukin-24 levels	0.00205483	0.00213146	24.2096	42.6787	23.3374
rs2165910	A	G	A	G	0.0674	-0.0367458	0.7371	0.73654	Bladder cancer	0.0584568	0.529612	GCST90274810	18	7919506	0.015	7.01e-06	18_7919506_A_G	11768	Interleukin-24 levels	0.00171303	0.00176063	20.752	42.6787	20.19
rs2341294	A	G	A	G	-0.1318	0.201505	0.0716	0.0687447	Bladder cancer	0.101617	0.0473691	GCST90274810	5	149232308	0.028	2.51e-06	5_149232308_A_G	9900	Interleukin-24 levels	0.00223355	0.00230945	22.9119	42.6787	22.1572
rs60306270	A	G	A	G	-0.0886	0.109426	0.1398	0.136554	Bladder cancer	0.0753109	0.146228	GCST90274810	16	49575164	0.0191	3.51e-06	16_49575164_A_G	11781	Interleukin-24 levels	0.00182347	0.00188801	22.2809	42.6787	21.5179
rs61760504	C	G	C	G	0.12	-0.0482779	0.9234	0.933255	Bladder cancer	0.103357	0.640428	GCST90274810	4	47684375	0.0265	5.95e-06	4_47684375_C_G	11337	Interleukin-24 levels	0.00180578	0.00203709	23.1376	42.6787	20.5055
rs61997688	T	C	T	C	-0.0757	-0.0506705	0.8019	0.793208	Bladder cancer	0.0631504	0.422334	GCST90274810	14	57398908	0.017	8.47e-06	14_57398908_T_C	11772	Interleukin-24 levels	0.00168185	0.00182065	21.4681	42.6787	19.8287
rs73169406	A	G	A	G	0.111	0.134719	0.1327	0.124236	Bladder cancer	0.0790554	0.08836	GCST90274810	22	48661109	0.0207	8.22e-08	22_48661109_A_G	11337	Interleukin-24 levels	0.00253037	0.00283607	32.2382	42.6787	28.7545
rs76088721	T	C	T	C	0.1847	-0.0516157	0.9596	0.963806	Bladder cancer	0.138548	0.709485	GCST90274810	9	23373327	0.0417	9.46e-06	9_23373327_T_C	8587	Interleukin-24 levels	0.00227998	0.00264506	22.7681	42.6787	19.6183
rs11153066	T	C	T	C	0.0615	-0.0166849	0.5833	0.607186	Bladder cancer	0.0528312	0.752143	GCST90274811	6	107846644	0.0137	7.15e-06	6_107846644_T_C	11343	Interleukin-2 receptor subunit beta levels	0.00177373	0.00183864	20.8904	42.6787	20.1516
rs111805691	A	G	A	G	-0.1278	-0.0470343	0.0648	0.0635275	Bladder cancer	0.105243	0.65494	GCST90274811	4	13099601	0.0286	7.88e-06	4_13099601_A_G	11344	Interleukin-2 receptor subunit beta levels	0.00175742	0.00197957	22.4968	42.6787	19.9678
rs115890206	A	G	A	G	0.232	0.0286808	0.9786	0.977377	Bladder cancer	0.171084	0.866865	GCST90274811	2	171243489	0.0502	3.81e-06	2_171243489_A_G	10403	Interleukin-2 receptor subunit beta levels	0.00204929	0.00225437	23.5007	42.6787	21.3584
rs116007066	A	G	A	G	-0.2101	0.0354673	0.025	0.0218671	Bladder cancer	0.176825	0.841028	GCST90274811	4	136755243	0.0441	1.9e-06	4_136755243_A_G	10295	Interleukin-2 receptor subunit beta levels	0.00220027	0.00215192	22.1975	42.6787	22.6973
rs116068903	T	C	T	C	0.2831	-0.0707515	0.0151	0.0148485	Bladder cancer	0.21229	0.738925	GCST90274811	1	67498721	0.0636	8.54e-06	1_67498721_T_C	10470	Interleukin-2 receptor subunit beta levels	0.00188921	0.00238385	25.0138	42.6787	19.8137
rs11630708	T	C	T	C	-0.2102	-0.298955	0.9766	0.980131	Bladder cancer	0.184	0.104215	GCST90274811	15	84665328	0.0443	2.09e-06	15_84665328_T_C	11788	Interleukin-2 receptor subunit beta levels	0.00190661	0.00201943	23.8491	42.6787	22.5143
rs116381951	T	C	T	C	0.2794	0.140329	0.9817	0.988087	Bladder cancer	0.233772	0.548317	GCST90274811	1	177439129	0.063	9.21e-06	1_177439129_T_C	9983	Interleukin-2 receptor subunit beta levels	0.00196672	0.00280487	28.0741	42.6787	19.6685
rs117538197	T	C	T	C	0.1213	0.108114	0.0695	0.0642541	Bladder cancer	0.105003	0.303184	GCST90274811	17	4507431	0.0261	3.36e-06	17_4507431_T_C	11774	Interleukin-2 receptor subunit beta levels	0.00183145	0.00190306	22.4456	42.6787	21.5993
rs13001788	T	C	T	C	0.2769	-0.234354	0.9745	0.986166	Bladder cancer	0.224154	0.29579	GCST90274811	2	31896839	0.0557	6.65e-07	2_31896839_T_C	8243	Interleukin-2 receptor subunit beta levels	0.00298989	0.00381064	31.5236	42.6787	24.7136
rs141460846	T	C	T	C	-0.2471	0.0162019	0.9783	0.980568	Bladder cancer	0.186377	0.930727	GCST90274811	11	40470032	0.0535	3.86e-06	11_40470032_T_C	11304	Interleukin-2 receptor subunit beta levels	0.00188393	0.00259243	29.3758	42.6787	21.3323
rs1472270	C	G	C	G	0.0704	0.00120016	0.346	0.348587	Bladder cancer	0.0548852	0.982554	GCST90274811	7	98121843	0.0144	1.01e-06	7_98121843_C_G	11344	Interleukin-2 receptor subunit beta levels	0.00210289	0.002243	25.4973	42.6787	23.9012
rs147955591	A	C	A	C	-0.0739	-0.038359	0.2186	0.184434	Bladder cancer	0.0666627	0.565007	GCST90274811	8	120536724	0.0166	8.52e-06	8_120536724_A_C	11344	Interleukin-2 receptor subunit beta levels	0.00174431	0.0018657	21.2004	42.6787	19.8186
rs17549820	T	C	T	C	0.0631	-4.59e-05	0.5622	0.566549	Bladder cancer	0.0534057	0.999314	GCST90274811	4	108118301	0.0129	1e-06	4_108118301_T_C	11791	Interleukin-2 receptor subunit beta levels	0.00202545	0.00196	23.1518	42.6787	23.9265
rs2157876	T	G	T	G	-0.1133	0.140528	0.0879	0.0795181	Bladder cancer	0.0950569	0.139312	GCST90274811	12	111592380	0.0239	2.13e-06	12_111592380_T_G	11343	Interleukin-2 receptor subunit beta levels	0.00197767	0.00205836	23.392	42.6787	22.4732
rs2281533	C	G	C	G	-0.1844	0.0610691	0.0481	0.0180094	Bladder cancer	0.193104	0.751813	GCST90274811	20	6103768	0.0404	5.01e-06	20_6103768_C_G	11776	Interleukin-2 receptor subunit beta levels	0.00176631	0.00311378	36.7762	42.6787	20.8333
rs301439	C	G	C	G	-0.0643	0.0507266	0.6412	0.63302	Bladder cancer	0.054017	0.347687	GCST90274811	9	4589802	0.0144	8e-06	9_4589802_C_G	11344	Interleukin-2 receptor subunit beta levels	0.00175487	0.00190238	21.618	42.6787	19.9387
rs34246740	T	C	T	C	-0.0721	0.00775028	0.2619	0.243542	Bladder cancer	0.0614891	0.899698	GCST90274811	11	36198233	0.0156	3.8e-06	11_36198233_T_C	11344	Interleukin-2 receptor subunit beta levels	0.00187981	0.00200979	22.841	42.6787	21.361
rs55757846	A	G	A	G	-0.1021	-0.0369472	0.8947	0.902758	Bladder cancer	0.0878704	0.674139	GCST90274811	14	25692351	0.0231	9.87e-06	14_25692351_A_G	11344	Interleukin-2 receptor subunit beta levels	0.00171945	0.00196421	22.3219	42.6787	19.5356
rs55987136	T	C	T	C	-0.1967	0.318573	0.9753	0.977729	Bladder cancer	0.175758	0.069899	GCST90274811	16	12220199	0.0443	8.99e-06	16_12220199_T_C	11781	Interleukin-2 receptor subunit beta levels	0.00167096	0.00186412	21.9985	42.6787	19.7152
rs71476282	T	C	T	C	-0.1842	-0.133557	0.0363	0.024006	Bladder cancer	0.170182	0.432578	GCST90274811	11	115220909	0.0412	7.79e-06	11_115220909_T_C	11344	Interleukin-2 receptor subunit beta levels	0.00175926	0.00237387	26.9886	42.6787	19.9887
rs9321271	A	C	A	C	-0.157	0.109734	0.9549	0.955125	Bladder cancer	0.124753	0.379072	GCST90274811	6	131393771	0.0325	1.36e-06	6_131393771_A_C	11779	Interleukin-2 receptor subunit beta levels	0.0019776	0.00212307	25.0566	42.6787	23.3363
rs9921181	A	G	A	G	-0.0606	-0.0113729	0.4465	0.455988	Bladder cancer	0.051514	0.825269	GCST90274811	16	80775714	0.0128	2.2e-06	16_80775714_A_G	11786	Interleukin-2 receptor subunit beta levels	0.00189849	0.00181516	21.4287	42.6787	22.4143
rs1013434	T	C	T	C	-0.0732	-0.0701465	0.2201	0.21119	Bladder cancer	0.0630674	0.266033	GCST90274812	21	40484010	0.0158	3.61e-06	21_40484010_T_C	11783	Interleukin-33 levels	0.00181859	0.00183955	21.7117	42.6787	21.4639
rs10415966	A	C	A	C	-0.1184	0.0886391	0.1177	0.107069	Bladder cancer	0.0840719	0.291734	GCST90274812	19	14299739	0.0233	3.74e-07	19_14299739_A_C	10281	Interleukin-33 levels	0.00250583	0.00291156	30.0153	42.6787	25.8221
rs10941408	T	C	T	C	-0.0666	0.0590016	0.2923	0.310142	Bladder cancer	0.0557124	0.289582	GCST90274812	5	38788544	0.0148	6.8e-06	5_38788544_T_C	11345	Interleukin-33 levels	0.00178206	0.00183509	20.8537	42.6787	20.25
rs10944013	T	G	T	G	0.174	-0.220717	0.9427	0.976128	Bladder cancer	0.168937	0.191381	GCST90274812	6	85296041	0.0389	7.71e-06	6_85296041_T_G	9257	Interleukin-33 levels	0.00215717	0.00327082	30.3708	42.6787	20.0078
rs112495884	A	G	A	G	0.3432	-0.0759388	0.0112	0.00900512	Bladder cancer	0.268379	0.777212	GCST90274812	18	73359115	0.0748	4.47e-06	18_73359115_A_G	10858	Interleukin-33 levels	0.00193544	0.00260886	28.3959	42.6787	21.0519
rs12453636	A	G	A	G	-0.1028	0.0361431	0.1006	0.0899619	Bladder cancer	0.0902481	0.688798	GCST90274812	17	64288475	0.0231	8.58e-06	17_64288475_A_G	9892	Interleukin-33 levels	0.00199847	0.00191235	18.9494	42.6787	19.8044
rs1273797	A	G	A	G	-0.0652	0.0160285	0.4698	0.484714	Bladder cancer	0.0513757	0.755051	GCST90274812	2	227438887	0.0144	5.96e-06	2_227438887_A_G	9252	Interleukin-33 levels	0.0022114	0.00211777	19.6309	42.6787	20.5008
rs13336496	A	C	A	C	0.0936	0.0113452	0.8755	0.86426	Bladder cancer	0.075016	0.879789	GCST90274812	16	79491576	0.0203	4.01e-06	16_79491576_A_C	11780	Interleukin-33 levels	0.00180179	0.00190989	22.5377	42.6787	21.2598
rs1427438	T	C	T	C	0.3362	0.00319392	0.0144	0.00278187	Bladder cancer	0.502695	0.994931	GCST90274812	3	69721499	0.0761	9.97e-06	3_69721499_T_C	10891	Interleukin-33 levels	0.00178921	0.0032084	35.0487	42.6787	19.5176
rs17147023	T	C	T	C	0.0689	-0.113967	0.7409	0.762921	Bladder cancer	0.0607068	0.060471	GCST90274812	9	133361010	0.0154	7.68e-06	9_133361010_T_C	11344	Interleukin-33 levels	0.00176174	0.00182262	20.7099	42.6787	20.0169
rs17149396	C	G	C	G	0.1833	-0.236655	0.0307	0.0231217	Bladder cancer	0.171095	0.16661	GCST90274812	7	24423445	0.04	4.59e-06	7_24423445_C_G	11789	Interleukin-33 levels	0.0017784	0.00199964	23.617	42.6787	20.9993
rs28658099	A	T	A	T	0.0848	-0.115622	0.8568	0.855411	Bladder cancer	0.07358	0.116095	GCST90274812	4	45839898	0.0188	6.46e-06	4_45839898_A_T	11773	Interleukin-33 levels	0.00172549	0.00176459	20.8077	42.6787	20.3459
rs35370544	T	G	T	G	0.1741	0.0993557	0.047	0.0374131	Bladder cancer	0.135391	0.463045	GCST90274812	4	189492967	0.0364	1.73e-06	4_189492967_T_G	8385	Interleukin-33 levels	0.00272152	0.0027153	22.8244	42.6787	22.8768
rs6099755	A	G	A	G	0.095	-0.0760055	0.1263	0.106674	Bladder cancer	0.0849173	0.370759	GCST90274812	20	56364589	0.0212	7.42e-06	20_56364589_A_G	11345	Interleukin-33 levels	0.00176717	0.00199179	22.6379	42.6787	20.0805
rs62556318	C	G	C	G	0.1308	0.0570047	0.9172	0.952536	Bladder cancer	0.126038	0.651067	GCST90274812	9	21663051	0.0277	2.34e-06	9_21663051_C_G	11345	Interleukin-33 levels	0.00196189	0.0025986	29.5527	42.6787	22.2975
rs66755903	A	G	A	G	-0.0752	-0.0841135	0.2321	0.228124	Bladder cancer	0.0620641	0.175332	GCST90274812	8	87995921	0.0162	3.45e-06	8_87995921_A_G	11345	Interleukin-33 levels	0.00189607	0.00201579	22.9113	42.6787	21.5479
rs75671803	A	G	A	G	0.2055	-0.0351014	0.9763	0.977931	Bladder cancer	0.176948	0.842755	GCST90274812	7	83421169	0.0451	5.2e-06	7_83421169_A_G	11785	Interleukin-33 levels	0.00175894	0.00195427	23.0723	42.6787	20.7621
rs77248338	T	G	T	G	0.2314	-0.156603	0.9759	0.972143	Bladder cancer	0.157354	0.319626	GCST90274812	15	98506292	0.0518	7.93e-06	15_98506292_T_G	10471	Interleukin-33 levels	0.00190255	0.00251871	26.435	42.6787	19.9557
rs7742625	C	G	C	G	0.0691	0.00278113	0.6997	0.712807	Bladder cancer	0.0565407	0.960769	GCST90274812	6	38719850	0.0148	3.03e-06	6_38719850_C_G	11345	Interleukin-33 levels	0.0019181	0.00200657	22.8062	42.6787	21.7988
rs77792454	T	C	T	C	-0.1166	0.00456679	0.1064	0.110698	Bladder cancer	0.0828224	0.956027	GCST90274812	6	156872261	0.0255	4.82e-06	6_156872261_T_C	8817	Interleukin-33 levels	0.00236628	0.00258531	22.8485	42.6787	20.9082
rs78455659	A	G	A	G	0.1259	-0.0350833	0.9273	0.950037	Bladder cancer	0.119762	0.769567	GCST90274812	12	96439814	0.0273	3.99e-06	12_96439814_A_G	11345	Interleukin-33 levels	0.00187148	0.00213716	24.2937	42.6787	21.268
rs79106704	T	C	T	C	-0.1015	0.125749	0.1034	0.09518	Bladder cancer	0.0876181	0.151231	GCST90274812	16	82628079	0.0227	7.77e-06	16_82628079_T_C	9909	Interleukin-33 levels	0.00201402	0.00191021	18.9607	42.6787	19.9931
rs79417946	T	C	T	C	-0.1259	0.0822841	0.0665	0.0682363	Bladder cancer	0.101477	0.417442	GCST90274812	9	31779365	0.0285	9.98e-06	9_31779365_T_C	11345	Interleukin-33 levels	0.00171746	0.00196796	22.3666	42.6787	19.5147
rs8042883	T	C	T	C	-0.0681	0.0150422	0.5496	0.551357	Bladder cancer	0.0521776	0.773126	GCST90274812	15	66970271	0.0135	4.55e-07	15_66970271_T_C	11345	Interleukin-33 levels	0.00223834	0.00229599	26.1033	42.6787	25.4464
rs10910814	C	G	C	G	0.1919	-0.32407	0.0407	0.0305681	Bladder cancer	0.148232	0.0287977	GCST90274813	1	145427960	0.0417	4.19e-06	1_145427960_C_G	7953	Interleukin-4 levels	0.00265644	0.0028756	22.9298	42.6787	21.1777
rs116963481	A	G	A	G	0.2805	-0.046564	0.9846	0.987393	Bladder cancer	0.230505	0.83991	GCST90274813	10	34284406	0.0592	2.16e-06	10_34284406_A_G	11793	Interleukin-4 levels	0.0019004	0.00238603	28.201	42.6787	22.4503
rs11989681	A	G	A	G	0.0678	-0.0290029	0.5982	0.5909	Bladder cancer	0.0523133	0.579299	GCST90274813	8	22649912	0.0136	6.19e-07	8_22649912_A_G	11345	Interleukin-4 levels	0.00218627	0.00220976	25.1209	42.6787	24.8532
rs12481726	T	C	T	C	-0.313	0.385051	0.0162	0.00597539	Bladder cancer	0.340858	0.258622	GCST90274813	20	51651490	0.0706	9.27e-06	20_51651490_T_C	9849	Interleukin-4 levels	0.00199209	0.00312277	30.8463	42.6787	19.6553
rs12641440	C	G	C	G	-0.1181	-0.0814541	0.9065	0.93124	Bladder cancer	0.101697	0.42316	GCST90274813	4	185529634	0.025	2.31e-06	4_185529634_C_G	11345	Interleukin-4 levels	0.00196353	0.00236434	26.8822	42.6787	22.3162
rs13130198	A	G	A	G	-0.0773	-0.0162723	0.2374	0.22966	Bladder cancer	0.0615251	0.791408	GCST90274813	4	40156881	0.0159	1.16e-06	4_40156881_A_G	11345	Interleukin-4 levels	0.00207938	0.00216355	24.5943	42.6787	23.6355
rs13418255	A	G	A	G	0.0701	-0.0296713	0.7233	0.741961	Bladder cancer	0.0586445	0.61289	GCST90274813	2	107668175	0.0153	4.61e-06	2_107668175_A_G	11345	Interleukin-4 levels	0.00184724	0.00196695	22.3551	42.6787	20.992
rs1490743	T	G	T	G	-0.1338	-0.022696	0.0752	0.0669373	Bladder cancer	0.103525	0.82647	GCST90274813	9	117036047	0.0278	1.49e-06	9_117036047_T_G	10281	Interleukin-4 levels	0.00224851	0.00249005	25.6591	42.6787	23.1645
rs2502347	T	C	T	C	-0.077	0.030411	0.2195	0.231099	Bladder cancer	0.0613677	0.620209	GCST90274813	1	243071390	0.0167	4.01e-06	1_243071390_T_C	11345	Interleukin-4 levels	0.00187071	0.00203151	23.0903	42.6787	21.2593
rs371539	T	G	T	G	0.0797	-0.00317924	0.8324	0.832922	Bladder cancer	0.06899	0.963244	GCST90274813	11	131406108	0.0177	6.71e-06	11_131406108_T_G	11775	Interleukin-4 levels	0.00171924	0.00177236	20.9031	42.6787	20.2754
rs4876407	T	G	T	G	-0.1391	0.0661107	0.9451	0.952313	Bladder cancer	0.121425	0.586127	GCST90274813	8	119274249	0.0299	3.28e-06	8_119274249_T_G	11788	Interleukin-4 levels	0.00183294	0.00200786	23.7123	42.6787	21.6427
rs61984458	T	C	T	C	-0.1955	0.035331	0.0285	0.0257589	Bladder cancer	0.162827	0.82822	GCST90274813	14	64861479	0.043	5.45e-06	14_64861479_T_C	11345	Interleukin-4 levels	0.00181902	0.00211647	24.058	42.6787	20.6708
rs669029	A	G	A	G	-0.0699	0.0598146	0.7524	0.755151	Bladder cancer	0.0601513	0.320027	GCST90274813	18	10579314	0.0158	9.69e-06	18_10579314_A_G	11345	Interleukin-4 levels	0.00172252	0.00182047	20.6873	42.6787	19.5722
rs6712163	T	C	T	C	0.0609	-2.05e-05	0.546	0.561311	Bladder cancer	0.0522377	0.999686	GCST90274813	2	43501970	0.0136	7.54e-06	2_43501970_T_C	11344	Interleukin-4 levels	0.00176482	0.00183871	20.8931	42.6787	20.052
rs75610895	T	C	T	C	-0.2354	-0.023653	0.0253	0.0265576	Bladder cancer	0.158938	0.881696	GCST90274813	10	6800809	0.045	1.68e-07	10_6800809_T_C	11787	Interleukin-4 levels	0.0023166	0.00273297	32.2963	42.6787	27.3645
rs7587695	A	C	A	C	0.0598	0.0927071	0.6086	0.606156	Bladder cancer	0.0525255	0.0775652	GCST90274813	2	172513639	0.0134	8.09e-06	2_172513639_A_C	11793	Interleukin-4 levels	0.0016862	0.00170367	20.1222	42.6787	19.9156
rs76678067	T	G	T	G	0.1045	0.0149347	0.9046	0.910472	Bladder cancer	0.0901165	0.868372	GCST90274813	15	79597917	0.0231	6.07e-06	15_79597917_T_G	11345	Interleukin-4 levels	0.00180093	0.00188481	21.4198	42.6787	20.4649
rs79359966	A	C	A	C	-0.1552	0.00720343	0.9596	0.962487	Bladder cancer	0.136078	0.957783	GCST90274813	8	71370392	0.0345	6.84e-06	8_71370392_A_C	11775	Interleukin-4 levels	0.00171598	0.00186761	22.0285	42.6787	20.237
rs802281	T	G	T	G	-0.1305	0.0608296	0.9368	0.938647	Bladder cancer	0.107578	0.57177	GCST90274813	6	124516990	0.0294	9.05e-06	6_124516990_T_G	11786	Interleukin-4 levels	0.0016692	0.00201658	23.8114	42.6787	19.7027
rs9270229	T	C	T	C	0.1212	0.122976	0.1501	0.149952	Bladder cancer	0.0712348	0.0842843	GCST90274813	6	32556783	0.0255	2e-06	6_32556783_T_C	6252	Interleukin-4 levels	0.00360145	0.00374786	23.5123	42.6787	22.5904
rs9425728	T	G	T	G	0.0664	0.0124345	0.2727	0.282322	Bladder cancer	0.0572405	0.828028	GCST90274813	1	173492229	0.015	9.57e-06	1_173492229_T_G	11345	Interleukin-4 levels	0.00172455	0.0017489	19.8725	42.6787	19.5954
rs10182644	T	C	T	C	-0.0828	-0.0237531	0.1671	0.165311	Bladder cancer	0.0696903	0.733225	GCST90274814	2	46461654	0.0186	8.52e-06	2_46461654_T_C	11344	Interleukin-5 levels	0.00174416	0.00190836	21.686	42.6787	19.8169
rs10988407	A	G	A	G	0.0777	0.0438581	0.2002	0.204069	Bladder cancer	0.0637083	0.491188	GCST90274814	9	132281601	0.0167	3.28e-06	9_132281601_A_G	11791	Interleukin-5 levels	0.00183289	0.00193338	22.8368	42.6787	21.6476
rs112289272	T	C	T	C	-0.213	0.232319	0.9743	0.979491	Bladder cancer	0.182705	0.203533	GCST90274814	3	126910721	0.0471	6.12e-06	3_126910721_T_C	10905	Interleukin-5 levels	0.00187222	0.00227203	24.8284	42.6787	20.4511
rs114829303	T	C	T	C	0.1661	-0.0511108	0.0436	0.0303703	Bladder cancer	0.151224	0.735378	GCST90274814	1	37473314	0.0361	4.2e-06	1_37473314_T_C	11344	Interleukin-5 levels	0.00186305	0.00230089	26.1568	42.6787	21.1702
rs12592185	T	C	T	C	0.0838	-0.0361557	0.8068	0.813523	Bladder cancer	0.0664473	0.586355	GCST90274814	15	70546132	0.0173	1.27e-06	15_70546132_T_C	11344	Interleukin-5 levels	0.00206447	0.00218923	24.8847	42.6787	23.4637
rs132210	T	C	T	C	-0.0686	-0.00555923	0.3408	0.339795	Bladder cancer	0.0548979	0.91934	GCST90274814	22	48143913	0.0141	1.14e-06	22_48143913_T_C	11344	Interleukin-5 levels	0.00208264	0.00211444	24.0328	42.6787	23.6706
rs139303816	A	G	A	G	0.1942	0.109973	0.0315	0.0296997	Bladder cancer	0.152357	0.470407	GCST90274814	1	62157502	0.0435	8.03e-06	1_62157502_A_G	9895	Interleukin-5 levels	0.00201056	0.00230112	22.8175	42.6787	19.9306
rs144124166	T	G	T	G	0.211	0.315932	0.0271	0.0234971	Bladder cancer	0.171126	0.0648632	GCST90274814	15	56343222	0.0465	5.69e-06	15_56343222_T_G	11768	Interleukin-5 levels	0.00174691	0.00234765	27.6874	42.6787	20.5901
rs17009223	A	G	A	G	-0.1169	-0.0321891	0.0881	0.0843082	Bladder cancer	0.0927771	0.728628	GCST90274814	1	208050360	0.0236	7.29e-07	1_208050360_A_G	11789	Interleukin-5 levels	0.0020773	0.00219575	25.9382	42.6787	24.5361
rs2212484	T	G	T	G	-0.0732	-0.0242504	0.2044	0.199784	Bladder cancer	0.0648184	0.708309	GCST90274814	11	132275295	0.0162	6.23e-06	11_132275295_T_G	11792	Interleukin-5 levels	0.00172873	0.00174272	20.5825	42.6787	20.417
rs2995998	T	C	T	C	-0.0623	-0.0283643	0.3561	0.362107	Bladder cancer	0.0534605	0.59572	GCST90274814	9	96094846	0.0137	5.43e-06	9_96094846_T_C	11792	Interleukin-5 levels	0.00175089	0.0017799	21.0225	42.6787	20.6793
rs34639000	A	G	A	G	0.0765	0.145871	0.7289	0.756389	Bladder cancer	0.0603021	0.0155628	GCST90274814	5	95530542	0.0147	1.95e-07	5_95530542_A_G	11773	Interleukin-5 levels	0.0022955	0.00231286	27.2879	42.6787	27.0825
rs41264833	A	G	A	G	-0.2117	-0.210634	0.0254	0.0199317	Bladder cancer	0.184158	0.25272	GCST90274814	1	159897328	0.0468	6.08e-06	1_159897328_A_G	11790	Interleukin-5 levels	0.00173283	0.00221887	26.2142	42.6787	20.4621
rs4277106	A	G	A	G	-0.2747	0.00202307	0.9858	0.984192	Bladder cancer	0.205647	0.992151	GCST90274814	11	10380223	0.0592	3.48e-06	11_10380223_A_G	11790	Interleukin-5 levels	0.00182323	0.00211263	24.9565	42.6787	21.5315
rs4815018	A	G	A	G	0.0615	-0.00395316	0.363	0.349514	Bladder cancer	0.0542841	0.941947	GCST90274814	20	2159791	0.0139	9.67e-06	20_2159791_A_G	11344	Interleukin-5 levels	0.00172299	0.00174915	19.8736	42.6787	19.5759
rs62069649	A	G	A	G	0.2206	0.0922619	0.0267	0.0254882	Bladder cancer	0.163688	0.572996	GCST90274814	17	59402478	0.0482	4.72e-06	17_59402478_A_G	10431	Interleukin-5 levels	0.00200448	0.00252929	26.4449	42.6787	20.9468
rs67927317	T	C	T	C	-0.114	-0.00559678	0.0784	0.0783777	Bladder cancer	0.0955752	0.953303	GCST90274814	16	6155800	0.0255	7.8e-06	16_6155800_T_C	11344	Interleukin-5 levels	0.00175904	0.00187801	21.3405	42.6787	19.9862
rs706716	T	C	T	C	-0.0708	0.0365177	0.2459	0.249382	Bladder cancer	0.059964	0.542529	GCST90274814	5	67548442	0.0158	7.43e-06	5_67548442_T_C	11344	Interleukin-5 levels	0.00176724	0.00185902	21.1243	42.6787	20.0795
rs7142197	A	G	A	G	-0.0924	0.00978777	0.1442	0.150821	Bladder cancer	0.0721184	0.892044	GCST90274814	14	93316119	0.0188	8.88e-07	14_93316119_A_G	11773	Interleukin-5 levels	0.00204798	0.00210723	24.8566	42.6787	24.1562
rs72873944	T	C	T	C	-0.1649	-0.107126	0.9609	0.976592	Bladder cancer	0.171159	0.531392	GCST90274814	2	139572732	0.0368	7.43e-06	2_139572732_T_C	11792	Interleukin-5 levels	0.00170017	0.00204327	24.1395	42.6787	20.0792
rs9457226	A	G	A	G	0.1911	0.0144979	0.0282	0.0195169	Bladder cancer	0.185996	0.93787	GCST90274814	6	167250912	0.0429	8.41e-06	6_167250912_A_G	11786	Interleukin-5 levels	0.00168106	0.0020016	23.6342	42.6787	19.843
rs10234370	T	C	T	C	0.0582	-0.0756543	0.6371	0.638253	Bladder cancer	0.0546776	0.166468	GCST90274815	7	28486167	0.0127	4.59e-06	7_28486167_T_C	14295	Interleukin-6 levels	0.00146716	0.00156628	22.422	42.6787	21.0009
rs10977774	A	C	A	C	-0.3418	0.30668	0.9865	0.99537	Bladder cancer	0.376183	0.414934	GCST90274815	9	954741	0.0701	1.08e-06	9_954741_A_C	12312	Interleukin-6 levels	0.00192758	0.00311175	38.4252	42.6787	23.7743
rs112669397	T	C	T	C	-0.3592	-0.179747	0.0119	0.00714642	Bladder cancer	0.304245	0.554656	GCST90274815	4	7449788	0.0787	5.01e-06	4_7449788_T_C	10217	Interleukin-6 levels	0.00203517	0.00303424	31.0891	42.6787	20.8316
rs12433894	C	G	C	G	0.063	-0.120404	0.2257	0.201563	Bladder cancer	0.064278	0.061044	GCST90274815	14	85619189	0.0139	5.83e-06	14_85619189_C_G	14726	Interleukin-6 levels	0.00139322	0.00138724	20.4541	42.6787	20.5424
rs1346147	A	G	A	G	-0.0659	0.0356158	0.7459	0.751676	Bladder cancer	0.0597764	0.551298	GCST90274815	8	21260780	0.0135	1.05e-06	8_21260780_A_G	14295	Interleukin-6 levels	0.00166439	0.00164621	23.5681	42.6787	23.8289
rs17486819	T	G	T	G	0.0975	-0.127368	0.9152	0.922954	Bladder cancer	0.0967304	0.187927	GCST90274815	2	113871806	0.0211	3.82e-06	2_113871806_T_G	14739	Interleukin-6 levels	0.00144679	0.00147554	21.7772	42.6787	21.3523
rs185969953	T	G	T	G	-0.3427	0.288067	0.0105	0.00819889	Bladder cancer	0.285585	0.313124	GCST90274815	13	68942611	0.0682	5.04e-07	13_68942611_T_G	12934	Interleukin-6 levels	0.00194871	0.00244041	31.6366	42.6787	25.2499
rs187416244	T	C	T	C	-0.2244	0.244627	0.0182	0.0154759	Bladder cancer	0.208541	0.24078	GCST90274815	7	76792340	0.0469	1.71e-06	7_76792340_T_C	14726	Interleukin-6 levels	0.00155239	0.00179958	26.5447	42.6787	22.8929
rs2228145	A	C	A	C	-0.1684	0.0314204	0.6128	0.59033	Bladder cancer	0.0519605	0.54538	GCST90274815	1	154426970	0.0119	1.83e-45	1_154426970_A_C	14742	Interleukin-6 levels	0.0134039	0.0134576	201.071	42.6787	200.258
rs248536	T	G	T	G	-0.0671	-0.00614857	0.2276	0.212825	Bladder cancer	0.063123	0.922404	GCST90274815	5	141146747	0.0143	2.7e-06	5_141146747_T_G	14295	Interleukin-6 levels	0.00153809	0.00158303	22.6621	42.6787	22.0178
rs35441559	A	C	A	C	-0.2484	-0.221706	0.9868	0.988637	Bladder cancer	0.24297	0.361514	GCST90274815	18	73432128	0.0553	7.06e-06	18_73432128_A_C	14740	Interleukin-6 levels	0.00136716	0.00160745	23.7287	42.6787	20.1768
rs76203502	A	G	A	G	-0.2492	0.28715	0.017	0.0104223	Bladder cancer	0.249357	0.249501	GCST90274815	10	127845552	0.0557	7.68e-06	10_127845552_A_G	12634	Interleukin-6 levels	0.00158207	0.00207553	26.2726	42.6787	20.0164
rs79254378	A	C	A	C	0.1173	-0.0783779	0.0664	0.0652254	Bladder cancer	0.103928	0.450756	GCST90274815	19	58504085	0.0262	7.57e-06	19_58504085_A_C	14295	Interleukin-6 levels	0.00140043	0.0017059	24.4242	42.6787	20.0444
rs10403201	A	G	A	G	-0.0584	-0.032275	0.2923	0.302145	Bladder cancer	0.0560411	0.564671	GCST90274816	19	14764810	0.0127	4.26e-06	19_14764810_A_G	14730	Interleukin-7 levels	0.00143368	0.00141102	20.8109	42.6787	21.1455
rs1050152	T	C	T	C	-0.0651	0.0553525	0.4122	0.432588	Bladder cancer	0.0517229	0.284542	GCST90274816	5	131676320	0.0133	9.84e-07	5_131676320_T_C	11785	Interleukin-7 levels	0.00202918	0.00205367	24.2481	42.6787	23.9584
rs10734292	A	G	A	G	0.1208	-0.00472245	0.067	0.0626937	Bladder cancer	0.106101	0.964499	GCST90274816	11	20486401	0.0267	6.06e-06	11_20486401_A_G	11776	Interleukin-7 levels	0.00173553	0.0018244	21.5198	42.6787	20.4697
rs111066336	T	C	T	C	0.0745	-0.0574123	0.3642	0.354067	Bladder cancer	0.0558777	0.304203	GCST90274816	8	106546447	0.014	1.03e-07	8_106546447_T_C	11538	Interleukin-7 levels	0.0024487	0.00257041	29.7287	42.6787	28.3176
rs11158239	T	G	T	G	0.0965	0.00182737	0.0814	0.0835335	Bladder cancer	0.0921516	0.984179	GCST90274816	14	59452945	0.0217	8.71e-06	14_59452945_T_G	14288	Interleukin-7 levels	0.00138237	0.00139263	19.9228	42.6787	19.7758
rs11171132	T	C	T	C	-0.0724	0.0176787	0.8342	0.838292	Bladder cancer	0.0698034	0.800064	GCST90274816	12	55251385	0.0163	8.92e-06	12_55251385_T_C	14288	Interleukin-7 levels	0.00137909	0.00144998	20.7445	42.6787	19.7289
rs112359206	A	G	A	G	0.1691	0.138745	0.9	0.90705	Bladder cancer	0.0883594	0.116361	GCST90274816	8	79713766	0.0225	5.67e-14	8_79713766_A_G	10894	Interleukin-7 levels	0.00515903	0.00514707	56.3519	42.6787	56.4836
rs116415547	T	G	T	G	0.2093	-0.257452	0.0198	0.0177948	Bladder cancer	0.196475	0.190076	GCST90274816	4	110732727	0.046	5.36e-06	4_110732727_T_G	13870	Interleukin-7 levels	0.0014906	0.00170039	23.6212	42.6787	20.7025
rs11742240	T	G	T	G	-0.0647	0.0088313	0.2796	0.273565	Bladder cancer	0.0575333	0.878005	GCST90274816	5	35881376	0.0131	7.86e-07	5_35881376_T_G	14736	Interleukin-7 levels	0.00165282	0.00168636	24.8888	42.6787	24.393
rs12217463	T	C	T	C	-0.1374	0.0865963	0.9572	0.969398	Bladder cancer	0.15026	0.564407	GCST90274816	10	16318694	0.031	9.33e-06	10_16318694_T_C	14736	Interleukin-7 levels	0.00133153	0.00154686	22.8267	42.6787	19.6449
rs12321566	A	G	A	G	0.0698	-0.0389738	0.237	0.241431	Bladder cancer	0.0603387	0.518333	GCST90274816	12	97807415	0.0139	5.12e-07	12_97807415_A_G	14287	Interleukin-7 levels	0.00176212	0.00176203	25.2151	42.6787	25.2163
rs12699881	A	G	A	G	0.068	-0.0145331	0.2517	0.241443	Bladder cancer	0.0602035	0.809245	GCST90274816	7	2401569	0.0138	8.33e-07	7_2401569_A_G	14288	Interleukin-7 levels	0.00169673	0.00174183	24.9273	42.6787	24.2806
rs144728120	T	C	T	C	0.1495	0.104468	0.0436	0.038978	Bladder cancer	0.134615	0.437719	GCST90274816	3	35502404	0.0316	2.23e-06	3_35502404_T_C	14717	Interleukin-7 levels	0.00151876	0.00186397	27.4795	42.6787	22.3825
rs17161952	T	C	T	C	0.0929	-0.110306	0.9031	0.92141	Bladder cancer	0.0966531	0.253765	GCST90274816	1	223649878	0.0204	5.27e-06	1_223649878_T_C	14734	Interleukin-7 levels	0.00140572	0.0015105	22.2864	42.6787	20.7382
rs570880779	T	C	T	C	-0.2336	-0.116237	0.0215	0.0140974	Bladder cancer	0.217307	0.592721	GCST90274816	15	73960703	0.0505	3.73e-06	15_73960703_T_C	13605	Interleukin-7 levels	0.00157053	0.00229602	31.3046	42.6787	21.3975
rs576004227	A	T	A	T	0.1597	0.016322	0.9615	0.955849	Bladder cancer	0.124815	0.895958	GCST90274816	4	147865967	0.0345	3.67e-06	4_147865967_A_T	12045	Interleukin-7 levels	0.00177609	0.00188821	22.7827	42.6787	21.4275
rs62338232	A	G	A	G	-0.0813	0.020583	0.1357	0.128465	Bladder cancer	0.0767134	0.78846	GCST90274816	4	185760185	0.018	6.28e-06	4_185760185_A_G	14288	Interleukin-7 levels	0.00142596	0.00155044	22.184	42.6787	20.4003
rs62387962	T	G	T	G	-0.078	0.0312626	0.1347	0.142438	Bladder cancer	0.0736853	0.671368	GCST90274816	5	157298830	0.0176	9.34e-06	5_157298830_T_G	14288	Interleukin-7 levels	0.00137296	0.00141825	20.2899	42.6787	19.641
rs74131483	A	G	A	G	0.1372	0.0445806	0.9451	0.936504	Bladder cancer	0.105131	0.67153	GCST90274816	1	194276216	0.0274	5.52e-07	1_194276216_A_G	13240	Interleukin-7 levels	0.00189044	0.00195339	25.9096	42.6787	25.073
rs76213792	T	G	T	G	-0.2791	-0.228826	0.0113	0.00951731	Bladder cancer	0.266797	0.391072	GCST90274816	12	17798114	0.0616	5.87e-06	12_17798114_T_G	14288	Interleukin-7 levels	0.00143491	0.00174058	24.9092	42.6787	20.5285
rs77336315	A	C	A	C	0.2512	-0.0172445	0.9836	0.988176	Bladder cancer	0.23965	0.942636	GCST90274816	1	97287518	0.0531	2.24e-06	1_97287518_A_C	13801	Interleukin-7 levels	0.00161919	0.00203578	28.1491	42.6787	22.3795
rs78939185	C	G	C	G	0.2134	0.330904	0.0211	0.0214669	Bladder cancer	0.177642	0.062497	GCST90274816	7	129478199	0.0481	9.14e-06	7_129478199_C_G	11775	Interleukin-7 levels	0.00166911	0.00188122	22.1893	42.6787	19.6833
rs79072837	T	C	T	C	-0.136	-0.0156149	0.0497	0.0410069	Bladder cancer	0.130314	0.904622	GCST90274816	15	81321256	0.028	1.19e-06	15_81321256_T_C	14715	Interleukin-7 levels	0.0016009	0.00174713	25.7505	42.6787	23.5918
rs11712240	T	C	T	C	0.0932	0.122463	0.1151	0.104075	Bladder cancer	0.0842647	0.146137	GCST90274817	3	132203683	0.0206	6.06e-06	3_132203683_T_C	11777	Interleukin-8 levels	0.00173533	0.00176942	20.8719	42.6787	20.469
rs12075	A	G	A	G	0.0667	-0.0188169	0.5552	0.579642	Bladder cancer	0.0520685	0.71781	GCST90274817	1	159175354	0.0116	8.92e-09	1_159175354_A_G	14741	Interleukin-8 levels	0.00223818	0.00219733	32.4578	42.6787	33.0625
rs12188297	A	T	A	T	-0.0755	-0.00416254	0.2006	0.191861	Bladder cancer	0.0660345	0.949738	GCST90274817	5	120608739	0.0147	2.81e-07	5_120608739_A_T	14740	Interleukin-8 levels	0.00178667	0.00182818	26.9931	42.6787	26.3791
rs12217463	T	C	T	C	-0.1365	0.0865963	0.9559	0.969398	Bladder cancer	0.15026	0.564407	GCST90274817	10	16318694	0.0308	9.34e-06	10_16318694_T_C	14744	Interleukin-8 levels	0.00133054	0.00157089	23.1945	42.6787	19.641
rs13064825	T	C	T	C	0.056	0.0704557	0.4104	0.387027	Bladder cancer	0.053785	0.190213	GCST90274817	3	16705058	0.012	3.06e-06	3_16705058_T_C	14296	Interleukin-8 levels	0.00152124	0.00151765	21.7262	42.6787	21.7778
rs141384565	A	G	A	G	-0.3943	0.356071	0.0095	0.00204207	Bladder cancer	0.58351	0.541715	GCST90274817	6	2140801	0.0886	8.57e-06	6_2140801_A_G	11331	Interleukin-8 levels	0.00174516	0.00292591	33.245	42.6787	19.8055
rs141979722	T	C	T	C	0.2829	0.0213543	0.0146	0.0129113	Bladder cancer	0.227992	0.925377	GCST90274817	3	172877373	0.0608	3.27e-06	3_172877373_T_C	11669	Interleukin-8 levels	0.00185223	0.00230283	26.9291	42.6787	21.65
rs144815207	T	C	T	C	0.3186	-0.578422	0.9879	0.991337	Bladder cancer	0.274121	0.03485	GCST90274817	1	233542010	0.0622	3.02e-07	1_233542010_T_C	13394	Interleukin-8 levels	0.00195531	0.00242672	32.5777	42.6787	26.2368
rs145125644	A	G	A	G	0.2687	0.28613	0.9866	0.989906	Bladder cancer	0.257564	0.266608	GCST90274817	7	17688229	0.0555	1.29e-06	7_17688229_A_G	14733	Interleukin-8 levels	0.00158864	0.00190902	28.1756	42.6787	23.4396
rs1516478	T	C	T	C	0.1479	0.0418401	0.0386	0.0294575	Bladder cancer	0.151311	0.782151	GCST90274817	3	76218188	0.0322	4.37e-06	3_76218188_T_C	14741	Interleukin-8 levels	0.00142934	0.00162352	23.968	42.6787	21.0972
rs1582581	A	G	A	G	-0.0541	0.0358098	0.393	0.390577	Bladder cancer	0.0529136	0.498558	GCST90274817	16	60551242	0.0119	5.46e-06	16_60551242_A_G	14730	Interleukin-8 levels	0.00140135	0.00139639	20.5947	42.6787	20.6681
rs1988503	T	C	T	C	0.0548	-0.0192262	0.5814	0.576409	Bladder cancer	0.0530433	0.717007	GCST90274817	17	11189278	0.0121	5.93e-06	17_11189278_T_C	14296	Interleukin-8 levels	0.00143289	0.00146172	20.9245	42.6787	20.5112
rs2466352	C	G	C	G	-0.0957	-0.066325	0.9125	0.933635	Bladder cancer	0.103204	0.520446	GCST90274817	8	133415401	0.0212	6.36e-06	8_133415401_C_G	14730	Interleukin-8 levels	0.00138168	0.0014625	21.5712	42.6787	20.3776
rs2612387	T	G	T	G	0.2945	0.0319452	0.0101	0.00907371	Bladder cancer	0.273256	0.906935	GCST90274817	18	73584415	0.0651	6.07e-06	18_73584415_T_G	12935	Interleukin-8 levels	0.00157987	0.00173426	22.4681	42.6787	20.4649
rs34519991	T	C	T	C	0.0555	0.0101152	0.5073	0.52121	Bladder cancer	0.0521069	0.846079	GCST90274817	18	12258051	0.012	3.75e-06	18_12258051_T_C	14296	Interleukin-8 levels	0.00149424	0.0015398	22.0438	42.6787	21.3906
rs4769882	T	C	T	C	-0.1103	-0.0680006	0.94	0.941467	Bladder cancer	0.109742	0.535495	GCST90274817	13	31352538	0.0249	9.44e-06	13_31352538_T_C	14744	Interleukin-8 levels	0.00132928	0.00137233	20.2588	42.6787	19.6224
rs6446951	A	G	A	G	-0.1894	0.122028	0.0665	0.0560509	Bladder cancer	0.111856	0.275297	GCST90274817	4	74574265	0.0241	3.87e-15	4_74574265_A_G	14729	Interleukin-8 levels	0.00417632	0.00445375	65.8838	42.6787	61.7626
rs6585420	T	C	T	C	0.1545	-0.0171686	0.9598	0.973958	Bladder cancer	0.162032	0.915615	GCST90274817	10	118629449	0.0325	2e-06	10_118629449_T_C	14744	Interleukin-8 levels	0.00153062	0.00184202	27.2051	42.6787	22.5991
rs6709159	A	G	A	G	0.0562	0.051523	0.4424	0.459134	Bladder cancer	0.0517361	0.319308	GCST90274817	2	108946178	0.0117	1.56e-06	2_108946178_A_G	14744	Interleukin-8 levels	0.00156266	0.00155826	23.0078	42.6787	23.0728
rs71337505	A	G	A	G	0.0948	0.155047	0.1019	0.104576	Bladder cancer	0.0844297	0.0662985	GCST90274817	19	34248514	0.0209	5.74e-06	19_34248514_A_G	14563	Interleukin-8 levels	0.00141098	0.00164492	23.9912	42.6787	20.5743
rs7216538	A	G	A	G	-0.1324	0.0743963	0.0541	0.0541473	Bladder cancer	0.113692	0.512876	GCST90274817	17	73572798	0.0279	2.08e-06	17_73572798_A_G	13672	Interleukin-8 levels	0.00164469	0.00179411	24.5695	42.6787	22.52
rs72633250	A	C	A	C	0.0574	-0.0283788	0.4025	0.374036	Bladder cancer	0.0548092	0.604616	GCST90274817	15	101649801	0.0124	3.67e-06	15_101649801_A_C	14296	Interleukin-8 levels	0.00149684	0.00158474	22.6882	42.6787	21.4279
rs72710634	T	C	T	C	0.1432	0.117362	0.0447	0.0290086	Bladder cancer	0.153109	0.443365	GCST90274817	5	2106405	0.0322	8.7e-06	5_2106405_T_C	14744	Interleukin-8 levels	0.00133979	0.00175131	25.8631	42.6787	19.7776
rs72886502	T	G	T	G	-0.3895	0.60207	0.0095	0.00850598	Bladder cancer	0.275842	0.029061	GCST90274817	18	36692976	0.076	2.98e-07	18_36692976_T_G	12291	Interleukin-8 levels	0.00213277	0.00285511	35.1869	42.6787	26.2656
rs75579654	A	G	A	G	0.1025	0.037937	0.0739	0.0600004	Bladder cancer	0.107539	0.724257	GCST90274817	1	46373240	0.0231	9.11e-06	1_46373240_A_G	14728	Interleukin-8 levels	0.00133524	0.00143807	21.2075	42.6787	19.689
rs76149515	T	C	T	C	-0.1546	0.136349	0.9689	0.967047	Bladder cancer	0.142923	0.340081	GCST90274817	16	4804879	0.0348	8.89e-06	16_4804879_T_C	14741	Interleukin-8 levels	0.00133725	0.00144042	21.2609	42.6787	19.7361
rs8069322	A	G	A	G	0.0668	0.00817596	0.7222	0.727323	Bladder cancer	0.0576692	0.887259	GCST90274817	17	54450134	0.0131	3.41e-07	17_54450134_A_G	14726	Interleukin-8 levels	0.00176286	0.00179049	26.4105	42.6787	26.0022
rs906401	T	C	T	C	0.0941	0.0339076	0.9034	0.901361	Bladder cancer	0.0859864	0.693332	GCST90274817	18	73700336	0.02	2.54e-06	18_73700336_T_C	14729	Interleukin-8 levels	0.0015009	0.00154549	22.7957	42.6787	22.137
rs972492	A	C	A	C	-0.0936	-0.0053166	0.1404	0.123655	Bladder cancer	0.0789578	0.946315	GCST90274817	5	37903927	0.0184	3.64e-07	5_37903927_A_C	12412	Interleukin-8 levels	0.00208085	0.00211468	26.2988	42.6787	25.8771
rs10403201	A	G	A	G	-0.0597	-0.032275	0.292	0.302145	Bladder cancer	0.0560411	0.564671	GCST90274818	19	14764810	0.0125	1.79e-06	19_14764810_A_G	14730	Latency-associated peptide transforming growth factor beta 1 levels	0.00154637	0.00147365	21.736	42.6787	22.8102
rs10508556	T	C	T	C	0.0523	-0.116947	0.4627	0.456948	Bladder cancer	0.0515566	0.0233091	GCST90274818	10	18285342	0.0114	4.48e-06	10_18285342_T_C	14735	Latency-associated peptide transforming growth factor beta 1 levels	0.00142654	0.00136003	20.0647	42.6787	21.0472
rs114152855	T	C	T	C	-0.299	-0.493985	0.0112	0.0113258	Bladder cancer	0.239355	0.039035	GCST90274818	4	175537640	0.0613	1.07e-06	4_175537640_T_C	14249	Latency-associated peptide transforming growth factor beta 1 levels	0.00166715	0.00198015	28.2672	42.6787	23.7915
rs143420877	T	C	T	C	0.1447	0.138229	0.0388	0.0342024	Bladder cancer	0.141563	0.328841	GCST90274818	8	51696312	0.0303	1.79e-06	8_51696312_T_C	14729	Latency-associated peptide transforming growth factor beta 1 levels	0.0015462	0.00156175	23.0359	42.6787	22.8061
rs144834546	T	C	T	C	-0.2662	-0.0877918	0.0227	0.0204096	Bladder cancer	0.18307	0.631545	GCST90274818	12	24809427	0.0526	4.17e-07	12_24809427_T_C	12935	Latency-associated peptide transforming growth factor beta 1 levels	0.00197645	0.00314412	40.7912	42.6787	25.6121
rs149458216	A	C	A	C	-0.2301	0.124256	0.0182	0.0163706	Bladder cancer	0.201655	0.537775	GCST90274818	16	48902293	0.0472	1.09e-06	16_48902293_A_C	14726	Latency-associated peptide transforming growth factor beta 1 levels	0.00161147	0.00189216	27.913	42.6787	23.7656
rs1800472	A	G	A	G	-0.4623	-0.241397	0.0345	0.0209051	Bladder cancer	0.180611	0.181366	GCST90274818	19	41847860	0.0335	2.55e-43	19_41847860_A_G	14736	Latency-associated peptide transforming growth factor beta 1 levels	0.0127603	0.014238	212.813	42.6787	190.44
rs183319799	T	G	T	G	0.2185	-0.154243	0.0182	0.0171321	Bladder cancer	0.197974	0.435919	GCST90274818	9	87111083	0.0461	2.14e-06	9_87111083_T_G	14733	Latency-associated peptide transforming growth factor beta 1 levels	0.00152267	0.00170619	25.1768	42.6787	22.4647
rs1921885	A	C	A	C	0.1265	0.110081	0.9391	0.944156	Bladder cancer	0.112214	0.326597	GCST90274818	4	84952443	0.0263	1.51e-06	4_84952443_A_C	14288	Latency-associated peptide transforming growth factor beta 1 levels	0.0016168	0.00183037	26.1967	42.6787	23.135
rs201799031	C	G	C	G	0.1918	-0.0269338	0.9725	0.981274	Bladder cancer	0.190233	0.887409	GCST90274818	7	113796203	0.0427	7.06e-06	7_113796203_C_G	11760	Latency-associated peptide transforming growth factor beta 1 levels	0.00171302	0.00196766	23.1813	42.6787	20.1763
rs2281119	T	C	T	C	-0.0873	-0.0432076	0.1204	0.102361	Bladder cancer	0.0848104	0.610429	GCST90274818	22	45002724	0.019	4.33e-06	22_45002724_T_C	14284	Latency-associated peptide transforming growth factor beta 1 levels	0.00147602	0.00161425	23.092	42.6787	21.1116
rs2365502	A	G	A	G	0.1321	-0.0348272	0.9369	0.959169	Bladder cancer	0.130885	0.79017	GCST90274818	7	156395495	0.029	5.23e-06	7_156395495_A_G	11777	Latency-associated peptide transforming growth factor beta 1 levels	0.00175907	0.00206328	24.3454	42.6787	20.7496
rs2525703	T	C	T	C	0.0668	-0.0682043	0.1815	0.181667	Bladder cancer	0.0668939	0.307924	GCST90274818	7	144100595	0.0151	9.7e-06	7_144100595_T_C	14723	Latency-associated peptide transforming growth factor beta 1 levels	0.00132765	0.0013258	19.543	42.6787	19.5704
rs34536806	T	G	T	G	0.0989	0.00527749	0.9023	0.920644	Bladder cancer	0.0970555	0.956636	GCST90274818	11	95274487	0.021	2.48e-06	11_95274487_T_G	14288	Latency-associated peptide transforming growth factor beta 1 levels	0.00155014	0.00172452	24.679	42.6787	22.1796
rs34992551	T	C	T	C	-0.0931	-0.0150602	0.1103	0.0665465	Bladder cancer	0.106185	0.887214	GCST90274818	7	16406570	0.0199	2.89e-06	7_16406570_T_C	14734	Latency-associated peptide transforming growth factor beta 1 levels	0.0014835	0.00170117	25.1044	42.6787	21.8874
rs371119188	T	C	T	C	0.1588	0.125283	0.0406	0.0367676	Bladder cancer	0.138169	0.364545	GCST90274818	13	112876202	0.0358	9.18e-06	13_112876202_T_C	12189	Latency-associated peptide transforming growth factor beta 1 levels	0.0016119	0.00196452	23.9887	42.6787	19.6759
rs4659810	A	G	A	G	-0.0551	-0.0825394	0.3438	0.34027	Bladder cancer	0.0546918	0.131254	GCST90274818	1	237983229	0.0121	5.27e-06	1_237983229_A_G	14710	Latency-associated peptide transforming growth factor beta 1 levels	0.00140788	0.00136986	20.1755	42.6787	20.7364
rs4911055	T	C	T	C	-0.0607	-0.0373098	0.6556	0.660589	Bladder cancer	0.0543417	0.492349	GCST90274818	13	85826913	0.0137	9.39e-06	13_85826913_T_C	11783	Latency-associated peptide transforming growth factor beta 1 levels	0.00166353	0.00166383	19.6343	42.6787	19.6307
rs4919925	T	C	T	C	0.0561	0.0539786	0.3696	0.360533	Bladder cancer	0.0542048	0.319335	GCST90274818	21	43119625	0.0124	6.06e-06	21_43119625_T_C	14287	Latency-associated peptide transforming growth factor beta 1 levels	0.0014308	0.00146657	20.9808	42.6787	20.4683
rs56025355	T	C	T	C	0.3006	-0.104864	0.0106	0.0103791	Bladder cancer	0.254571	0.680394	GCST90274818	17	62499163	0.0666	6.38e-06	17_62499163_T_C	12968	Latency-associated peptide transforming growth factor beta 1 levels	0.00156871	0.00189533	24.6216	42.6787	20.3718
rs560709031	A	G	A	G	-0.2819	0.0373678	0.0141	0.0127748	Bladder cancer	0.229667	0.870751	GCST90274818	2	121864864	0.0626	6.69e-06	2_121864864_A_G	10407	Latency-associated peptide transforming growth factor beta 1 levels	0.00194515	0.00220939	23.0396	42.6787	20.2788
rs58801460	A	G	A	G	0.0964	-0.0669862	0.081	0.0566523	Bladder cancer	0.111472	0.54789	GCST90274818	5	11362066	0.0216	8.08e-06	5_11362066_A_G	14736	Latency-associated peptide transforming growth factor beta 1 levels	0.00135002	0.00138352	20.413	42.6787	19.918
rs60821320	A	C	A	C	-0.1083	-0.144321	0.0779	0.0834872	Bladder cancer	0.0928022	0.11991	GCST90274818	12	95312882	0.0232	3.04e-06	12_95312882_A_C	12852	Latency-associated peptide transforming growth factor beta 1 levels	0.00169294	0.00168501	21.6889	42.6787	21.7912
rs6827317	A	G	A	G	0.2159	0.101691	0.0172	0.01544	Bladder cancer	0.207726	0.624457	GCST90274818	4	10683051	0.048	6.86e-06	4_10683051_A_G	14736	Latency-associated peptide transforming growth factor beta 1 levels	0.00137122	0.0015759	23.256	42.6787	20.2313
rs7013321	A	G	A	G	-0.0608	0.0756657	0.4469	0.451879	Bladder cancer	0.0532292	0.15517	GCST90274818	8	106593558	0.0121	5.04e-07	8_106593558_A_G	14288	Latency-associated peptide transforming growth factor beta 1 levels	0.00176425	0.00182747	26.1551	42.6787	25.2485
rs7247630	T	C	T	C	0.1378	0.0265614	0.0525	0.0421216	Bladder cancer	0.129324	0.83727	GCST90274818	19	41981195	0.0271	3.68e-07	19_41981195_T_C	14729	Latency-associated peptide transforming growth factor beta 1 levels	0.0017526	0.00188915	27.8742	42.6787	25.8559
rs73045256	A	G	A	G	-0.1921	0.073081	0.9378	0.944722	Bladder cancer	0.112521	0.516022	GCST90274818	19	41811072	0.0276	3.4e-12	19_41811072_A_G	14288	Latency-associated peptide transforming growth factor beta 1 levels	0.00337952	0.00430512	61.7689	42.6787	48.4436
rs73112514	C	G	C	G	0.2053	0.0443245	0.9689	0.976157	Bladder cancer	0.17252	0.797238	GCST90274818	4	26142254	0.0433	2.12e-06	4_26142254_C_G	12393	Latency-associated peptide transforming growth factor beta 1 levels	0.00181096	0.00254008	31.5543	42.6787	22.4803
rs734515	A	G	A	G	-0.0594	-0.0906025	0.7486	0.719952	Bladder cancer	0.0570613	0.112329	GCST90274818	17	9112300	0.0133	7.96e-06	17_9112300_A_G	14715	Latency-associated peptide transforming growth factor beta 1 levels	0.00135388	0.00132806	19.5657	42.6787	19.9466
rs7570818	A	G	A	G	-0.0849	0.0606215	0.8857	0.890681	Bladder cancer	0.0824332	0.462095	GCST90274818	2	107310081	0.0183	3.5e-06	2_107310081_A_G	14729	Latency-associated peptide transforming growth factor beta 1 levels	0.00145937	0.00145941	21.5242	42.6787	21.5235
rs7656674	A	T	A	T	0.0626	0.0984011	0.5957	0.609959	Bladder cancer	0.0529111	0.062922	GCST90274818	4	5793052	0.0121	2.3e-07	4_5793052_A_T	14288	Latency-associated peptide transforming growth factor beta 1 levels	0.00187006	0.0018876	27.0173	42.6787	26.7657
rs7820135	T	C	T	C	-0.0747	-0.010303	0.8321	0.849599	Bladder cancer	0.0718272	0.885941	GCST90274818	8	68719454	0.0155	1.44e-06	8_68719454_T_C	14730	Latency-associated peptide transforming growth factor beta 1 levels	0.00157453	0.00155918	22.9995	42.6787	23.2262
rs10152968	A	G	A	G	0.0678	0.0208637	0.7664	0.767881	Bladder cancer	0.0610132	0.732386	GCST90274819	15	60604436	0.0153	9.36e-06	15_60604436_A_G	11792	Leukemia inhibitory factor levels	0.0016628	0.00164595	19.4378	42.6787	19.6371
rs11127419	T	C	T	C	0.0707	-0.0934125	0.3559	0.370826	Bladder cancer	0.0539128	0.0831565	GCST90274819	2	3091471	0.0153	3.82e-06	2_3091471_T_C	9252	Leukemia inhibitory factor levels	0.0023031	0.00229166	21.2465	42.6787	21.3529
rs111417524	T	C	T	C	0.3026	-0.102422	0.0139	0.00783566	Bladder cancer	0.288715	0.722777	GCST90274819	7	52054682	0.0674	7.14e-06	7_52054682_T_C	10701	Leukemia inhibitory factor levels	0.00188043	0.00251017	26.9239	42.6787	20.1566
rs11608349	A	T	A	T	-0.3084	0.455297	0.0168	0.0112199	Bladder cancer	0.246756	0.0650185	GCST90274819	12	68026044	0.0661	3.08e-06	12_68026044_A_T	9362	Leukemia inhibitory factor levels	0.00232028	0.00314203	29.5021	42.6787	21.7684
rs116794364	C	G	C	G	-0.3015	-0.415116	0.9851	0.990165	Bladder cancer	0.26092	0.111616	GCST90274819	2	224292526	0.0631	1.77e-06	2_224292526_C_G	10858	Leukemia inhibitory factor levels	0.00209862	0.00266853	29.047	42.6787	22.8305
rs117675814	T	C	T	C	-0.2448	0.0756977	0.018	0.0140441	Bladder cancer	0.21832	0.728795	GCST90274819	7	67523386	0.0544	6.8e-06	7_67523386_T_C	11345	Leukemia inhibitory factor levels	0.00178206	0.00211854	24.0816	42.6787	20.25
rs117844161	A	G	A	G	0.1842	-0.175994	0.9695	0.976214	Bladder cancer	0.169328	0.298634	GCST90274819	13	88387973	0.0408	6.34e-06	13_88387973_A_G	11781	Leukemia inhibitory factor levels	0.00172743	0.00200658	23.6831	42.6787	20.3826
rs11883375	A	G	A	G	-0.1011	0.00890086	0.1385	0.144882	Bladder cancer	0.0734904	0.903599	GCST90274819	19	54851842	0.0197	2.87e-07	19_54851842_A_G	11776	Leukemia inhibitory factor levels	0.0022319	0.00243914	28.7887	42.6787	26.3372
rs12595568	T	G	T	G	-0.0652	-0.0625463	0.2544	0.253459	Bladder cancer	0.0590958	0.289878	GCST90274819	15	38990803	0.0146	7.98e-06	15_38990803_T_G	11792	Leukemia inhibitory factor levels	0.00168866	0.00161268	19.0442	42.6787	19.943
rs13105239	A	C	A	C	0.0575	0.0827852	0.5333	0.506909	Bladder cancer	0.0518008	0.110011	GCST90274819	4	23472007	0.013	9.73e-06	4_23472007_A_C	11766	Leukemia inhibitory factor levels	0.00166025	0.00164579	19.393	42.6787	19.5636
rs13264315	A	T	A	T	0.0757	-0.0215031	0.6575	0.673166	Bladder cancer	0.0572519	0.707224	GCST90274819	8	109432178	0.0158	1.66e-06	8_109432178_A_T	9460	Leukemia inhibitory factor levels	0.00242117	0.00258094	24.4737	42.6787	22.955
rs1348602	T	G	T	G	-0.0782	0.0890696	0.2297	0.224382	Bladder cancer	0.0619227	0.15032	GCST90274819	13	35704767	0.0173	6.18e-06	13_35704767_T_G	9023	Leukemia inhibitory factor levels	0.00225987	0.00216404	19.5641	42.6787	20.4325
rs142330159	A	T	A	T	0.1155	0.00511737	0.0986	0.0806998	Bladder cancer	0.0957431	0.957374	GCST90274819	5	171514639	0.0258	7.58e-06	5_171514639_A_T	9436	Leukemia inhibitory factor levels	0.00211986	0.00237131	22.4241	42.6787	20.0412
rs145344087	C	G	C	G	0.2548	0.112794	0.021	0.0201691	Bladder cancer	0.185213	0.542527	GCST90274819	3	58954742	0.0556	4.59e-06	3_58954742_C_G	10281	Leukemia inhibitory factor levels	0.00203898	0.00266951	27.5133	42.6787	21.0014
rs147461732	A	G	A	G	0.2606	-0.0994984	0.0179	0.0124412	Bladder cancer	0.232461	0.668635	GCST90274819	15	80114266	0.0583	7.82e-06	15_80114266_A_G	11345	Leukemia inhibitory factor levels	0.00175841	0.00238774	27.149	42.6787	19.9807
rs150843753	T	G	T	G	0.1742	-0.0649768	0.9676	0.972619	Bladder cancer	0.158974	0.68274	GCST90274819	16	78805709	0.0385	6.05e-06	16_78805709_T_G	11779	Leukemia inhibitory factor levels	0.00173534	0.00190269	22.4507	42.6787	20.4727
rs1534627	T	C	T	C	0.06	0.0308615	0.5978	0.619291	Bladder cancer	0.0533515	0.562957	GCST90274819	10	13969539	0.0132	5.48e-06	10_13969539_T_C	11791	Leukemia inhibitory factor levels	0.00174951	0.00173113	20.4437	42.6787	20.6612
rs190222173	A	C	A	C	-0.3456	0.208866	0.9882	0.994339	Bladder cancer	0.338993	0.537804	GCST90274819	3	121028150	0.0781	9.64e-06	3_121028150_A_C	9984	Leukemia inhibitory factor levels	0.00195784	0.00278551	27.8826	42.6787	19.5815
rs234592	A	G	A	G	-0.0635	-0.0145176	0.5456	0.543706	Bladder cancer	0.0519858	0.780045	GCST90274819	14	97087097	0.0136	3.02e-06	14_97087097_A_G	11345	Leukemia inhibitory factor levels	0.00191826	0.00199936	22.7241	42.6787	21.8007
rs332426	A	G	A	G	0.112	0.0889427	0.0899	0.100284	Bladder cancer	0.0856482	0.299054	GCST90274819	19	6801966	0.0238	2.53e-06	19_6801966_A_G	11789	Leukemia inhibitory factor levels	0.00187527	0.00205265	24.2443	42.6787	22.1453
rs4326609	A	T	A	T	-0.0707	-0.0479851	0.7435	0.743053	Bladder cancer	0.059471	0.419744	GCST90274819	1	244347370	0.0155	5.08e-06	1_244347370_A_T	11345	Leukemia inhibitory factor levels	0.00183084	0.0019065	21.6668	42.6787	20.8054
rs4699986	T	G	T	G	0.0629	0.0517824	0.6927	0.693643	Bladder cancer	0.0562636	0.357389	GCST90274819	5	61150440	0.0139	6.03e-06	5_61150440_T_G	11792	Leukemia inhibitory factor levels	0.00173382	0.00168438	19.8923	42.6787	20.4773
rs62213023	T	C	T	C	-0.1676	-0.132856	0.0399	0.0392683	Bladder cancer	0.132774	0.317009	GCST90274819	21	43995327	0.0374	7.42e-06	21_43995327_T_C	11345	Leukemia inhibitory factor levels	0.00176729	0.00215212	24.4642	42.6787	20.0819
rs7225483	T	G	T	G	0.0671	-0.000239271	0.486	0.478598	Bladder cancer	0.0513468	0.996282	GCST90274819	17	28341679	0.0143	2.7e-06	17_28341679_T_G	9849	Leukemia inhibitory factor levels	0.002231	0.00224944	22.2002	42.6787	22.0178
rs74992559	A	G	A	G	0.1725	-0.0509231	0.0351	0.0294456	Bladder cancer	0.153035	0.73932	GCST90274819	10	31490202	0.0367	2.6e-06	10_31490202_A_G	11784	Leukemia inhibitory factor levels	0.0018716	0.00201557	23.7954	42.6787	22.0926
rs80092539	A	T	A	T	0.0993	-0.08216	0.8758	0.868085	Bladder cancer	0.0769578	0.285702	GCST90274819	2	46125903	0.0213	3.13e-06	2_46125903_A_T	11345	Leukemia inhibitory factor levels	0.00191241	0.00214514	24.3846	42.6787	21.734
rs825264	A	G	A	G	-0.2119	0.128522	0.0321	0.0164782	Bladder cancer	0.20285	0.526353	GCST90274819	2	222585468	0.0453	2.9e-06	2_222585468_A_G	10291	Leukemia inhibitory factor levels	0.00212212	0.00279015	28.7882	42.6787	21.8809
rs9482537	C	G	C	G	0.1084	-0.12543	0.9095	0.922149	Bladder cancer	0.098331	0.202101	GCST90274819	6	124651086	0.0243	8.16e-06	6_124651086_C_G	11345	Leukemia inhibitory factor levels	0.00175128	0.00193437	21.9841	42.6787	19.8997
rs9648464	T	C	T	C	0.0606	0.0633133	0.4384	0.437516	Bladder cancer	0.0528054	0.230531	GCST90274819	7	4467714	0.0135	7.16e-06	7_4467714_T_C	11345	Leukemia inhibitory factor levels	0.00177329	0.00180831	20.5488	42.6787	20.1501
rs112883732	A	G	A	G	0.0639	0.0056578	0.2266	0.225729	Bladder cancer	0.061478	0.926675	GCST90274820	2	174802976	0.0144	9.1e-06	2_174802976_A_G	11784	Leukemia inhibitory factor receptor levels	0.00166852	0.00143118	16.8864	42.6787	19.6914
rs115938660	T	C	T	C	-0.2181	0.11549	0.0215	0.011261	Bladder cancer	0.243779	0.635678	GCST90274820	5	110784241	0.0467	3.01e-06	5_110784241_T_C	11770	Leukemia inhibitory factor receptor levels	0.00185	0.00200143	23.6001	42.6787	21.8111
rs117117000	A	G	A	G	0.1586	-0.138443	0.961	0.964516	Bladder cancer	0.138829	0.318659	GCST90274820	8	119917062	0.0333	1.91e-06	8_119917062_A_G	11784	Leukemia inhibitory factor receptor levels	0.0019216	0.00188549	22.2568	42.6787	22.6839
rs1275374	A	G	A	G	-0.0611	-0.0640129	0.4056	0.402353	Bladder cancer	0.0538972	0.234957	GCST90274820	8	118638630	0.0137	8.2e-06	8_118638630_A_G	11336	Leukemia inhibitory factor receptor levels	0.00175185	0.00180007	20.4388	42.6787	19.8903
rs12754806	A	G	A	G	0.0563	-0.00356702	0.4817	0.480964	Bladder cancer	0.0513615	0.944632	GCST90274820	1	238821453	0.0122	3.94e-06	1_238821453_A_G	11768	Leukemia inhibitory factor receptor levels	0.00180669	0.00158272	18.6518	42.6787	21.296
rs141933232	A	G	A	G	-0.2724	-0.0958266	0.0169	0.0140823	Bladder cancer	0.220242	0.663492	GCST90274820	17	36964094	0.0546	6.07e-07	17_36964094_A_G	11724	Leukemia inhibitory factor receptor levels	0.00211888	0.00246563	28.9736	42.6787	24.8902
rs143212977	A	G	A	G	0.2467	0.37858	0.0184	0.0125857	Bladder cancer	0.231442	0.101893	GCST90274820	12	115088443	0.0558	9.82e-06	12_115088443_A_G	11336	Leukemia inhibitory factor receptor levels	0.00172162	0.00219847	24.9724	42.6787	19.5465
rs147006060	A	G	A	G	-0.2602	-0.184321	0.0179	0.00648803	Bladder cancer	0.322336	0.567437	GCST90274820	21	43780807	0.0566	4.28e-06	21_43780807_A_G	11775	Leukemia inhibitory factor receptor levels	0.00179191	0.00238042	28.0915	42.6787	21.134
rs1604713	A	C	A	C	-0.1451	-0.060044	0.9399	0.958313	Bladder cancer	0.129292	0.642356	GCST90274820	8	107256388	0.0322	6.6e-06	8_107256388_A_C	11336	Leukemia inhibitory factor receptor levels	0.00178839	0.0023786	27.0233	42.6787	20.3059
rs1690678	A	C	A	C	0.0904	-0.0439228	0.1109	0.108009	Bladder cancer	0.082618	0.594977	GCST90274820	10	27930818	0.0192	2.5e-06	10_27930818_A_C	11784	Leukemia inhibitory factor receptor levels	0.00187802	0.00161157	19.0182	42.6787	22.1684
rs2289779	T	G	T	G	0.0788	0.0300557	0.5419	0.565607	Bladder cancer	0.0520195	0.563415	GCST90274820	5	38527228	0.0134	4.09e-09	5_38527228_T_G	11336	Leukemia inhibitory factor receptor levels	0.00304184	0.00308292	35.0498	42.6787	34.5814
rs2569006	T	G	T	G	-0.0553	0.0342996	0.4142	0.424422	Bladder cancer	0.0519368	0.508991	GCST90274820	5	145246085	0.0125	9.69e-06	5_145246085_T_G	11780	Leukemia inhibitory factor receptor levels	0.00165897	0.00148402	17.5048	42.6787	19.5718
rs41307428	T	C	T	C	0.2027	0.264723	0.067	0.0179714	Bladder cancer	0.196639	0.178226	GCST90274820	9	136336804	0.0299	1.21e-11	9_136336804_T_C	11774	Leukemia inhibitory factor receptor levels	0.00388886	0.00513682	60.7828	42.6787	45.9584
rs452976	T	C	T	C	0.0692	-0.0139927	0.8025	0.803728	Bladder cancer	0.0648151	0.829076	GCST90274820	5	84611579	0.0153	6.1e-06	5_84611579_T_C	11770	Leukemia inhibitory factor receptor levels	0.00173529	0.00151794	17.8903	42.6787	20.4564
rs4689540	T	C	T	C	0.0611	0.00370177	0.5834	0.56953	Bladder cancer	0.0519696	0.943215	GCST90274820	4	6753471	0.0138	9.53e-06	4_6753471_T_C	11336	Leukemia inhibitory factor receptor levels	0.0017266	0.00181467	20.6049	42.6787	19.6031
rs4937122	T	G	T	G	0.1262	0.016625	0.9129	0.925937	Bladder cancer	0.0976483	0.86481	GCST90274820	11	126228659	0.0248	3.61e-07	11_126228659_T_G	11336	Leukemia inhibitory factor receptor levels	0.00227951	0.00253274	28.7789	42.6787	25.895
rs6002001	A	G	A	G	0.6489	-0.439645	0.0043	0.00240764	Bladder cancer	0.53207	0.408639	GCST90274820	22	41054967	0.1417	4.66e-06	22_41054967_A_G	6861	Leukemia inhibitory factor receptor levels	0.0030481	0.00360564	24.8206	42.6787	20.9708
rs62258077	T	C	T	C	-0.063	0.00211187	0.6603	0.627715	Bladder cancer	0.0530885	0.968268	GCST90274820	3	58363371	0.013	1.26e-06	3_58363371_T_C	11762	Leukemia inhibitory factor receptor levels	0.00199306	0.00178052	20.9763	42.6787	23.4852
rs635634	T	C	T	C	-0.2885	0.0809805	0.1918	0.184394	Bladder cancer	0.0667465	0.225033	GCST90274820	9	136155000	0.0153	2.61e-79	9_136155000_T_C	11784	Leukemia inhibitory factor receptor levels	0.0292939	0.0258041	312.077	42.6787	355.557
rs6671847	A	G	A	G	-0.0604	-0.066205	0.4812	0.509843	Bladder cancer	0.0517443	0.200734	GCST90274820	1	161478810	0.0135	7.67e-06	1_161478810_A_G	11336	Leukemia inhibitory factor receptor levels	0.00176302	0.0018215	20.6826	42.6787	20.0173
rs7047277	T	C	T	C	0.0558	-0.067109	0.6218	0.624178	Bladder cancer	0.0533915	0.208782	GCST90274820	9	14698077	0.0126	9.49e-06	9_14698077_T_C	11774	Leukemia inhibitory factor receptor levels	0.00166324	0.00146444	17.2646	42.6787	19.6122
rs72730728	A	T	A	T	0.1414	-0.231766	0.9403	0.957348	Bladder cancer	0.129344	0.0731543	GCST90274820	5	36424241	0.0302	2.84e-06	5_36424241_A_T	11336	Leukemia inhibitory factor receptor levels	0.00193047	0.00224476	25.4993	42.6787	21.9222
rs72837682	T	C	T	C	-0.08	-0.0236116	0.7807	0.803089	Bladder cancer	0.0658264	0.719823	GCST90274820	17	7063650	0.0172	3.3e-06	17_7063650_T_C	11336	Leukemia inhibitory factor receptor levels	0.00190507	0.00219146	24.8925	42.6787	21.6333
rs73157388	T	C	T	C	-0.1306	-0.164716	0.9229	0.944554	Bladder cancer	0.113585	0.147016	GCST90274820	7	79349730	0.0285	4.6e-06	7_79349730_T_C	11336	Leukemia inhibitory factor receptor levels	0.00184931	0.00242731	27.5781	42.6787	20.9989
rs778016	A	G	A	G	-0.0681	-0.0841738	0.2875	0.282989	Bladder cancer	0.0577568	0.145011	GCST90274820	6	68918580	0.0145	2.65e-06	6_68918580_A_G	9883	Leukemia inhibitory factor receptor levels	0.00222735	0.00189997	18.8093	42.6787	22.0576
rs78981063	A	G	A	G	-0.1377	-0.0206856	0.9558	0.959864	Bladder cancer	0.129725	0.873308	GCST90274820	2	84195883	0.0302	5.13e-06	2_84195883_A_G	11784	Leukemia inhibitory factor receptor levels	0.00176145	0.00160209	18.9061	42.6787	20.79
rs8059299	A	G	A	G	0.1051	-0.088004	0.8941	0.910653	Bladder cancer	0.0901011	0.328705	GCST90274820	16	9246057	0.0232	5.89e-06	16_9246057_A_G	11336	Leukemia inhibitory factor receptor levels	0.00180743	0.00209179	23.758	42.6787	20.5225
rs9313148	C	G	C	G	-0.0824	0.0938468	0.1414	0.143497	Bladder cancer	0.073158	0.199563	GCST90274820	5	6378192	0.0173	1.91e-06	5_6378192_C_G	11777	Leukemia inhibitory factor receptor levels	0.00192294	0.00164864	19.4447	42.6787	22.6862
rs11214549	A	G	A	G	-0.1673	-0.158055	0.0305	0.0244024	Bladder cancer	0.165223	0.338764	GCST90274821	11	113108311	0.0376	8.61e-06	11_113108311_A_G	14732	Monocyte chemoattractant protein-1 levels	0.00134224	0.00165527	24.4226	42.6787	19.7978
rs117265389	C	G	C	G	0.1734	-0.0167267	0.0256	0.0239706	Bladder cancer	0.167745	0.920571	GCST90274821	16	4938452	0.0377	4.24e-06	16_4938452_C_G	14733	Monocyte chemoattractant protein-1 levels	0.00143404	0.00150005	22.1304	42.6787	21.1551
rs117317477	T	G	T	G	-0.3227	-0.299796	0.0125	0.00647216	Bladder cancer	0.319589	0.34821	GCST90274821	22	21921920	0.0704	4.57e-06	22_21921920_T_G	11725	Monocyte chemoattractant protein-1 levels	0.00178911	0.00257084	30.2156	42.6787	21.0113
rs117510656	T	C	T	C	-0.2587	0.317066	0.9806	0.995178	Bladder cancer	0.371876	0.393874	GCST90274821	11	87277670	0.0562	4.16e-06	11_87277670_T_C	14285	Monocyte chemoattractant protein-1 levels	0.00148135	0.00254634	36.4622	42.6787	21.1895
rs11870164	T	C	T	C	0.0751	0.0479708	0.2772	0.272385	Bladder cancer	0.0580553	0.408637	GCST90274821	17	32567679	0.013	7.61e-09	17_32567679_T_C	14733	Monocyte chemoattractant protein-1 levels	0.00226036	0.00226007	33.3685	42.6787	33.3728
rs12075	A	G	A	G	0.1694	-0.0188169	0.5552	0.579642	Bladder cancer	0.0520685	0.71781	GCST90274821	1	159175354	0.0113	8.39e-51	1_159175354_A_G	14730	Monocyte chemoattractant protein-1 levels	0.0150297	0.0141733	211.746	42.6787	224.735
rs12133241	T	G	T	G	0.0728	-0.125376	0.8345	0.841017	Bladder cancer	0.0707884	0.0765377	GCST90274821	1	14260220	0.0157	3.54e-06	1_14260220_T_G	14713	Monocyte chemoattractant protein-1 levels	0.00145944	0.00146392	21.5673	42.6787	21.5012
rs12367122	A	G	A	G	0.0739	-0.101824	0.1756	0.176596	Bladder cancer	0.06865	0.138013	GCST90274821	12	30998369	0.0159	3.35e-06	12_30998369_A_G	14284	Monocyte chemoattractant protein-1 levels	0.00151025	0.00158118	22.6182	42.6787	21.602
rs142018247	T	C	T	C	0.1966	0.101355	0.02	0.0194571	Bladder cancer	0.187195	0.588205	GCST90274821	2	114120803	0.0442	8.67e-06	2_114120803_T_C	14726	Monocyte chemoattractant protein-1 levels	0.00134188	0.00151514	22.3428	42.6787	19.7844
rs146186562	T	G	T	G	-0.2293	-0.156084	0.9789	0.987175	Bladder cancer	0.230741	0.498756	GCST90274821	6	20408729	0.0497	3.96e-06	6_20408729_T_G	14285	Monocyte chemoattractant protein-1 levels	0.00148809	0.00217199	31.0901	42.6787	21.2861
rs148307902	A	G	A	G	0.2553	0.181981	0.0243	0.00970578	Bladder cancer	0.264328	0.49116	GCST90274821	5	2885014	0.0538	2.08e-06	5_2885014_A_G	13798	Monocyte chemoattractant protein-1 levels	0.00162958	0.00309068	42.7712	42.6787	22.5184
rs149604038	C	G	C	G	-0.2813	0.0753873	0.9851	0.988811	Bladder cancer	0.241922	0.755331	GCST90274821	3	185463545	0.0556	4.21e-07	3_185463545_C_G	13798	Monocyte chemoattractant protein-1 levels	0.00185196	0.00232293	32.1218	42.6787	25.597
rs1788443	T	C	T	C	-0.0537	-0.0146611	0.5055	0.525935	Bladder cancer	0.0520358	0.778135	GCST90274821	21	43981957	0.0119	6.4e-06	21_43981957_T_C	14285	Monocyte chemoattractant protein-1 levels	0.00142369	0.00144167	20.6211	42.6787	20.3636
rs182599222	A	T	A	T	-0.4028	-0.730754	0.991	0.995451	Bladder cancer	0.380298	0.0546652	GCST90274821	8	115072929	0.0864	3.13e-06	8_115072929_A_T	11334	Monocyte chemoattractant protein-1 levels	0.00191431	0.00289418	32.892	42.6787	21.7346
rs1846616	A	T	A	T	0.0856	-0.0181513	0.362	0.365157	Bladder cancer	0.0534245	0.73404	GCST90274821	3	46032441	0.0119	6.33e-13	3_46032441_A_T	14719	Monocyte chemoattractant protein-1 levels	0.00350356	0.0033846	49.9803	42.6787	51.7432
rs190108694	A	G	A	G	-0.2084	-0.0736784	0.0286	0.0233563	Bladder cancer	0.172392	0.669096	GCST90274821	18	75133468	0.0455	4.64e-06	18_75133468_A_G	11325	Monocyte chemoattractant protein-1 levels	0.0018493	0.00241318	27.3905	42.6787	20.9784
rs207311	T	C	T	C	0.0579	-0.0289644	0.6697	0.677177	Bladder cancer	0.0550242	0.598615	GCST90274821	4	19075878	0.0126	4.32e-06	4_19075878_T_C	14285	Monocyte chemoattractant protein-1 levels	0.00147623	0.00148312	21.2149	42.6787	21.1162
rs2544916	A	T	A	T	0.1653	-0.160949	0.9698	0.978134	Bladder cancer	0.174654	0.356773	GCST90274821	5	100158495	0.0366	6.29e-06	5_100158495_A_T	14720	Monocyte chemoattractant protein-1 levels	0.00138399	0.00160053	23.5944	42.6787	20.3978
rs34292320	T	C	T	C	-0.0684	-0.032538	0.2742	0.282939	Bladder cancer	0.0581676	0.575899	GCST90274821	13	43553825	0.0134	3.32e-07	13_43553825_T_C	14285	Monocyte chemoattractant protein-1 levels	0.00182092	0.0018622	26.6474	42.6787	26.0557
rs352082	C	G	C	G	0.0788	-0.092746	0.1269	0.122947	Bladder cancer	0.0789881	0.240324	GCST90274821	6	114180646	0.0178	9.56e-06	6_114180646_C_G	14284	Monocyte chemoattractant protein-1 levels	0.00137034	0.00137597	19.6786	42.6787	19.598
rs35728689	A	G	A	G	0.3004	-0.0604873	0.0959	0.0740241	Bladder cancer	0.098971	0.541093	GCST90274821	3	46390228	0.0198	5.44e-52	3_46390228_A_G	14732	Monocyte chemoattractant protein-1 levels	0.0153862	0.0156482	234.162	42.6787	230.181
rs4682862	A	G	A	G	0.0576	-0.0296968	0.6154	0.593238	Bladder cancer	0.0523619	0.570615	GCST90274821	3	42877413	0.0122	2.34e-06	3_42877413_A_G	14285	Monocyte chemoattractant protein-1 levels	0.00155822	0.00157051	22.4669	42.6787	22.2908
rs72730728	A	T	A	T	0.1238	-0.231766	0.9416	0.957348	Bladder cancer	0.129344	0.0731543	GCST90274821	5	36424241	0.0272	5.33e-06	5_36424241_A_T	14285	Monocyte chemoattractant protein-1 levels	0.00144829	0.00168559	24.1159	42.6787	20.7159
rs7619350	A	G	A	G	0.0986	0.11444	0.118	0.105348	Bladder cancer	0.0839912	0.173031	GCST90274821	3	132269435	0.0201	9.32e-07	3_132269435_A_G	11764	Monocyte chemoattractant protein-1 levels	0.0020417	0.00202365	23.8504	42.6787	24.0637
rs77128226	T	C	T	C	-0.1063	-0.0612313	0.0875	0.0785492	Bladder cancer	0.0961544	0.524254	GCST90274821	20	15213518	0.0218	1.08e-06	20_15213518_T_C	14285	Monocyte chemoattractant protein-1 levels	0.00166193	0.00180442	25.8191	42.6787	23.7768
rs77344300	T	C	T	C	-0.1381	-0.114438	0.0491	0.0436531	Bladder cancer	0.125956	0.363583	GCST90274821	9	78838039	0.0293	2.44e-06	9_78838039_T_C	14733	Monocyte chemoattractant protein-1 levels	0.00150579	0.00178088	26.2809	42.6787	22.2153
rs79697698	T	C	T	C	-0.348	0.341357	0.0136	0.00404102	Bladder cancer	0.410508	0.405664	GCST90274821	20	9086080	0.0653	9.86e-08	20_9086080_T_C	13752	Monocyte chemoattractant protein-1 levels	0.00206126	0.00324923	44.8226	42.6787	28.4009
rs9324105	T	C	T	C	-0.0775	-0.00741191	0.1395	0.139702	Bladder cancer	0.0746746	0.920935	GCST90274821	14	29273195	0.0175	9.49e-06	14_29273195_T_C	14285	Monocyte chemoattractant protein-1 levels	0.00137123	0.00144198	20.6255	42.6787	19.6122
rs9942602	T	C	T	C	0.0618	-0.0265656	0.4922	0.487055	Bladder cancer	0.0517909	0.607993	GCST90274821	7	17977054	0.0117	1.28e-07	7_17977054_T_C	14728	Monocyte chemoattractant protein-1 levels	0.00189103	0.00190916	28.168	42.6787	27.9001
rs12523126	A	T	A	T	0.1121	-0.0599698	0.0746	0.0742863	Bladder cancer	0.0986493	0.543248	GCST90274822	5	165649355	0.0232	1.35e-06	5_165649355_A_T	14288	Monocyte chemoattractant protein 2 levels	0.00163161	0.00173504	24.8299	42.6787	23.3472
rs2005792	A	G	A	G	0.1744	0.0464805	0.7531	0.767965	Bladder cancer	0.0613521	0.448689	GCST90274822	17	32565404	0.0136	1.21e-37	17_32565404_A_G	14729	Monocyte chemoattractant protein 2 levels	0.0110428	0.0113109	168.481	42.6787	164.443
rs3136674	T	C	T	C	-0.1803	-0.161574	0.9455	0.947179	Bladder cancer	0.11475	0.159116	GCST90274822	17	32682616	0.0267	1.45e-11	17_32682616_T_C	14736	Monocyte chemoattractant protein 2 levels	0.00308536	0.00335027	49.5288	42.6787	45.6004
rs553846395	T	G	T	G	0.8974	-0.00193106	0.8999	0.915005	Bladder cancer	0.0961763	0.983981	GCST90274822	17	32668781	0.0241	1e-300	17_32668781_T_G	10894	Monocyte chemoattractant protein 2 levels	0.112925	0.145088	1848.49	42.6787	1386.56
rs744156	A	C	A	C	-0.1588	0.0614502	0.9594	0.966477	Bladder cancer	0.143022	0.667446	GCST90274822	16	4700056	0.0325	1.03e-06	16_4700056_A_C	13663	Monocyte chemoattractant protein 2 levels	0.00174459	0.00196452	26.8902	42.6787	23.8745
rs7550207	T	C	T	C	0.0672	0.0235535	0.769	0.76347	Bladder cancer	0.0604882	0.696987	GCST90274822	1	159174885	0.0139	1.33e-06	1_159174885_T_C	14736	Monocyte chemoattractant protein 2 levels	0.0015838	0.00160438	23.6769	42.6787	23.3727
rs75580960	T	C	T	C	-0.0904	0.0916363	0.8703	0.870741	Bladder cancer	0.0763048	0.22978	GCST90274822	19	2151761	0.0188	1.52e-06	19_2151761_T_C	13224	Monocyte chemoattractant protein 2 levels	0.00174568	0.00184491	24.4385	42.6787	23.1218
rs116170440	A	G	A	G	-0.257	-0.16456	0.0167	0.0177925	Bladder cancer	0.193642	0.395426	GCST90274823	4	36138371	0.0579	9.05e-06	4_36138371_A_G	10848	Monocyte chemoattractant protein-3 levels	0.00181322	0.0021692	23.5782	42.6787	19.7019
rs117550373	T	G	T	G	-0.1405	0.195167	0.0501	0.0439667	Bladder cancer	0.125418	0.119676	GCST90274823	14	76638061	0.0314	7.66e-06	14_76638061_T_G	11762	Monocyte chemoattractant protein-3 levels	0.0016996	0.00187888	22.1372	42.6787	20.0213
rs12075	A	G	A	G	-0.0899	-0.0188169	0.5624	0.579642	Bladder cancer	0.0520685	0.71781	GCST90274823	1	159175354	0.013	4.67e-12	1_159175354_A_G	11780	Monocyte chemoattractant protein-3 levels	0.00404391	0.00397807	47.0408	42.6787	47.8225
rs12661848	T	G	T	G	0.0655	-0.0477802	0.5602	0.538775	Bladder cancer	0.0524885	0.362665	GCST90274823	6	123906471	0.0147	8.36e-06	6_123906471_T_G	9889	Monocyte chemoattractant protein-3 levels	0.00200407	0.00211403	20.9457	42.6787	19.854
rs139796674	A	G	A	G	0.2334	0.0590941	0.0249	0.0141246	Bladder cancer	0.221201	0.789352	GCST90274823	9	110584352	0.0492	2.1e-06	9_110584352_A_G	11335	Monocyte chemoattractant protein-3 levels	0.00198182	0.00264533	30.0591	42.6787	22.5046
rs146174820	A	G	A	G	0.2663	-0.0236297	0.0247	0.0158706	Bladder cancer	0.207994	0.909549	GCST90274823	2	68614232	0.0547	1.13e-06	2_68614232_A_G	10469	Monocyte chemoattractant protein-3 levels	0.00225924	0.0034167	35.8853	42.6787	23.7011
rs147793446	A	G	A	G	0.1941	-0.0227743	0.0345	0.0164603	Bladder cancer	0.203014	0.91068	GCST90274823	1	201769310	0.0413	2.6e-06	1_201769310_A_G	11770	Monocyte chemoattractant protein-3 levels	0.00187342	0.00250988	29.6106	42.6787	22.0877
rs148859911	A	G	A	G	0.1507	-0.0739493	0.05	0.0477348	Bladder cancer	0.121559	0.542962	GCST90274823	11	42245173	0.0328	4.34e-06	11_42245173_A_G	11771	Monocyte chemoattractant protein-3 levels	0.00179045	0.0021575	25.4465	42.6787	21.1095
rs16947053	A	G	A	G	0.2264	0.0118982	0.9779	0.979734	Bladder cancer	0.183846	0.948398	GCST90274823	15	93092575	0.0487	3.34e-06	15_93092575_A_G	11783	Monocyte chemoattractant protein-3 levels	0.00183112	0.00221549	26.1586	42.6787	21.612
rs182239847	T	G	T	G	-0.1716	0.00299685	0.9096	0.974302	Bladder cancer	0.16639	0.98563	GCST90274823	4	144892144	0.0359	1.75e-06	4_144892144_T_G	9453	Monocyte chemoattractant protein-3 levels	0.00241168	0.00484265	45.9906	42.6787	22.8479
rs187435509	T	G	T	G	0.171	-0.00401321	0.0356	0.0320616	Bladder cancer	0.145141	0.977941	GCST90274823	16	4844729	0.0381	7.18e-06	16_4844729_T_G	11780	Monocyte chemoattractant protein-3 levels	0.00170737	0.00200784	23.6959	42.6787	20.1438
rs2228467	T	C	T	C	-0.3169	-0.0924073	0.9268	0.938641	Bladder cancer	0.107081	0.388158	GCST90274823	3	42906116	0.0252	2.88e-36	3_42906116_T_C	11782	Monocyte chemoattractant protein-3 levels	0.0132467	0.0136261	162.733	42.6787	158.141
rs28571854	T	C	T	C	-0.1098	0.248944	0.0785	0.0786308	Bladder cancer	0.0954874	0.0091315	GCST90274823	9	16472947	0.0247	8.78e-06	9_16472947_T_C	11775	Monocyte chemoattractant protein-3 levels	0.0016757	0.00174421	20.5705	42.6787	19.7611
rs28667091	T	G	T	G	-0.0613	0.0103769	0.4117	0.397954	Bladder cancer	0.0525427	0.84344	GCST90274823	4	47682997	0.0133	4.05e-06	4_47682997_T_G	11782	Monocyte chemoattractant protein-3 levels	0.00180007	0.00182025	21.4816	42.6787	21.2431
rs4146770	T	C	T	C	-0.0933	0.00104313	0.7978	0.790886	Bladder cancer	0.063089	0.986808	GCST90274823	3	151048544	0.0165	1.56e-08	3_151048544_T_C	11760	Monocyte chemoattractant protein-3 levels	0.00271195	0.00280846	33.1149	42.6787	31.9739
rs481267	A	G	A	G	-0.0754	-0.0771409	0.3263	0.326476	Bladder cancer	0.0546788	0.158304	GCST90274823	1	108717820	0.015	4.99e-07	1_108717820_A_G	9889	Monocyte chemoattractant protein-3 levels	0.0025491	0.00249952	24.7747	42.6787	25.2674
rs7116054	T	C	T	C	-0.0998	0.0845632	0.1822	0.196305	Bladder cancer	0.0647122	0.191295	GCST90274823	11	68891695	0.0179	2.47e-08	11_68891695_T_C	11335	Monocyte chemoattractant protein-3 levels	0.0027354	0.00296816	33.7382	42.6787	31.0853
rs7213460	A	G	A	G	0.0942	0.0654376	0.4161	0.420425	Bladder cancer	0.0519491	0.207796	GCST90274823	17	32522613	0.0132	9.58e-13	17_32522613_A_G	11780	Monocyte chemoattractant protein-3 levels	0.00430535	0.00431189	51.0054	42.6787	50.9277
rs72689930	T	G	T	G	0.1624	0.410357	0.9529	0.973983	Bladder cancer	0.160677	0.0106514	GCST90274823	4	158925763	0.0363	7.68e-06	4_158925763_T_G	11783	Monocyte chemoattractant protein-3 levels	0.00169605	0.00236739	27.9564	42.6787	20.0151
rs72793575	A	G	A	G	0.1043	-0.0551432	0.1037	0.0887186	Bladder cancer	0.0912685	0.54572	GCST90274823	2	23771966	0.0235	9.07e-06	2_23771966_A_G	11335	Monocyte chemoattractant protein-3 levels	0.00173514	0.00202223	22.9644	42.6787	19.6985
rs72939501	A	G	A	G	-0.1014	0.183271	0.1082	0.0964759	Bladder cancer	0.0879151	0.0371021	GCST90274823	18	60781974	0.0226	7.23e-06	18_60781974_A_G	11335	Monocyte chemoattractant protein-3 levels	0.00177314	0.00198427	22.5324	42.6787	20.1307
rs7327202	C	G	C	G	-0.0969	-0.0186086	0.1497	0.146481	Bladder cancer	0.0727815	0.7982	GCST90274823	13	58931726	0.0194	5.89e-07	13_58931726_C_G	10903	Monocyte chemoattractant protein-3 levels	0.00228342	0.0023904	26.1202	42.6787	24.9485
rs74157668	T	C	T	C	0.1574	0.0286218	0.0404	0.0312813	Bladder cancer	0.14926	0.847932	GCST90274823	10	121143312	0.0343	4.46e-06	10_121143312_T_C	11781	Monocyte chemoattractant protein-3 levels	0.00178458	0.00192093	22.6702	42.6787	21.0582
rs78848134	T	C	T	C	0.2441	0.25989	0.0198	0.0156923	Bladder cancer	0.203305	0.201134	GCST90274823	20	41126657	0.0514	2.04e-06	20_41126657_T_C	11296	Monocyte chemoattractant protein-3 levels	0.00199294	0.00231284	26.1818	42.6787	22.5533
rs8129542	A	T	A	T	-0.1022	-0.0124974	0.1218	0.108019	Bladder cancer	0.0844747	0.882388	GCST90274823	21	45846823	0.0228	7.38e-06	21_45846823_A_T	10271	Monocyte chemoattractant protein-3 levels	0.00195279	0.00223446	22.9971	42.6787	20.0924
rs9968876	T	G	T	G	-0.1046	0.0290637	0.8991	0.897118	Bladder cancer	0.0843617	0.73046	GCST90274823	6	100087282	0.0221	2.21e-06	6_100087282_T_G	11774	Monocyte chemoattractant protein-3 levels	0.00189934	0.00198515	23.4156	42.6787	22.4016
rs10140592	A	G	A	G	0.2704	0.143289	0.0209	0.00758329	Bladder cancer	0.297778	0.630378	GCST90274824	14	70451473	0.0553	1.01e-06	14_70451473_A_G	13753	Monocyte chemoattractant protein-4 levels	0.0017357	0.00299238	41.2717	42.6787	23.9091
rs113911480	T	G	T	G	-0.1502	0.0651365	0.9632	0.964092	Bladder cancer	0.138672	0.638559	GCST90274824	14	29113167	0.0333	6.47e-06	14_29113167_T_G	14709	Monocyte chemoattractant protein-4 levels	0.00138142	0.00159932	23.5588	42.6787	20.3447
rs114438927	A	G	A	G	0.2261	0.0992139	0.0163	0.0181272	Bladder cancer	0.190215	0.601958	GCST90274824	15	30072182	0.05	6.13e-06	15_30072182_A_G	12852	Monocyte chemoattractant protein-4 levels	0.00158879	0.00163939	21.1007	42.6787	20.4485
rs115511138	A	G	A	G	0.1956	0.263979	0.9694	0.968482	Bladder cancer	0.147081	0.0726878	GCST90274824	4	115566991	0.042	3.21e-06	4_115566991_A_G	13944	Monocyte chemoattractant protein-4 levels	0.00155324	0.00226982	31.7179	42.6787	21.689
rs12075	A	G	A	G	0.189	-0.0188169	0.5553	0.579642	Bladder cancer	0.0520685	0.71781	GCST90274824	1	159175354	0.0114	9.89e-62	1_159175354_A_G	14733	Monocyte chemoattractant protein-4 levels	0.0183169	0.017642	264.552	42.6787	274.861
rs144118870	A	G	A	G	0.1749	0.127306	0.963	0.97831	Bladder cancer	0.176469	0.470657	GCST90274824	6	31214807	0.0368	2.01e-06	6_31214807_A_G	14735	Monocyte chemoattractant protein-4 levels	0.00153083	0.00217991	32.1867	42.6787	22.5883
rs144982290	T	C	T	C	0.2271	-0.243234	0.025	0.0210768	Bladder cancer	0.180659	0.178182	GCST90274824	4	153541434	0.05	5.57e-06	4_153541434_T_C	13801	Monocyte chemoattractant protein-4 levels	0.00149279	0.00251425	34.7816	42.6787	20.6298
rs148945704	C	G	C	G	-0.2016	0.0400519	0.0179	0.0162754	Bladder cancer	0.201667	0.842573	GCST90274824	2	160090389	0.0456	9.82e-06	2_160090389_C_G	14232	Monocyte chemoattractant protein-4 levels	0.00137167	0.00142896	20.3632	42.6787	19.5457
rs181250	T	C	T	C	-0.1032	0.0485015	0.8805	0.879127	Bladder cancer	0.0810852	0.549737	GCST90274824	17	56210459	0.0208	6.99e-07	17_56210459_T_C	11538	Monocyte chemoattractant protein-4 levels	0.00212937	0.00224123	25.9129	42.6787	24.6169
rs2192410	C	G	C	G	0.072	-0.0352086	0.1934	0.195955	Bladder cancer	0.0650266	0.588198	GCST90274824	3	172370658	0.0158	5.19e-06	3_172370658_C_G	12836	Monocyte chemoattractant protein-4 levels	0.00161542	0.00161737	20.791	42.6787	20.7659
rs2497351	T	C	T	C	0.0668	-0.0148904	0.2018	0.188736	Bladder cancer	0.0656952	0.820689	GCST90274824	10	94520346	0.0145	4.09e-06	10_94520346_T_C	14736	Monocyte chemoattractant protein-4 levels	0.00143837	0.00143753	21.211	42.6787	21.2235
rs2631360	A	G	A	G	0.0609	-0.0895994	0.5448	0.518933	Bladder cancer	0.0513701	0.081125	GCST90274824	5	131707429	0.0131	3.34e-06	5_131707429_A_G	11782	Monocyte chemoattractant protein-4 levels	0.00183126	0.00183952	21.7095	42.6787	21.6119
rs2721961	T	G	T	G	-0.1201	0.0535574	0.7293	0.719091	Bladder cancer	0.0574383	0.351112	GCST90274824	8	116657911	0.0133	1.72e-19	8_116657911_T_G	14288	Monocyte chemoattractant protein-4 levels	0.00567545	0.00569522	81.8279	42.6787	81.5423
rs3136676	A	G	A	G	0.3903	-0.162088	0.9384	0.941443	Bladder cancer	0.109726	0.139619	GCST90274824	17	32683289	0.0251	1.6e-54	17_32683289_A_G	14728	Monocyte chemoattractant protein-4 levels	0.0161544	0.0176115	263.996	42.6787	241.796
rs34202150	T	C	T	C	0.08	0.0806193	0.8698	0.886311	Bladder cancer	0.0828068	0.330263	GCST90274824	16	24019294	0.0181	9.88e-06	16_24019294_T_C	14288	Monocyte chemoattractant protein-4 levels	0.00136559	0.00144957	20.7387	42.6787	19.5354
rs3917900	A	G	A	G	0.1557	-0.00581886	0.6401	0.622466	Bladder cancer	0.053342	0.913134	GCST90274824	17	32587314	0.012	1.7e-38	17_32587314_A_G	14730	Monocyte chemoattractant protein-4 levels	0.0113015	0.0111696	166.364	42.6787	168.351
rs438824	A	G	A	G	-0.0548	0.0459728	0.4985	0.488419	Bladder cancer	0.051041	0.367746	GCST90274824	9	102016891	0.0121	5.93e-06	9_102016891_A_G	14287	Monocyte chemoattractant protein-4 levels	0.0014338	0.00150151	21.4813	42.6787	20.5112
rs4980395	T	C	T	C	0.0748	-0.172406	0.184	0.175143	Bladder cancer	0.0696362	0.0132933	GCST90274824	11	1876594	0.0164	5.09e-06	11_1876594_T_C	14288	Monocyte chemoattractant protein-4 levels	0.00145403	0.00168012	24.0426	42.6787	20.8025
rs55842014	A	G	A	G	-0.0638	-0.0212476	0.3598	0.377888	Bladder cancer	0.0535434	0.691492	GCST90274824	3	46289113	0.0131	1.11e-06	3_46289113_A_G	12404	Monocyte chemoattractant protein-4 levels	0.00190887	0.0018752	23.3	42.6787	23.7191
rs56003568	C	G	C	G	0.0569	-0.032645	0.2956	0.296332	Bladder cancer	0.0562574	0.561726	GCST90274824	2	203491699	0.0126	6.31e-06	2_203491699_C_G	14734	Monocyte chemoattractant protein-4 levels	0.00138236	0.00134827	19.8896	42.6787	20.3931
rs62201455	A	C	A	C	-0.2136	0.235389	0.9807	0.987849	Bladder cancer	0.236385	0.319355	GCST90274824	20	12689462	0.0451	2.18e-06	20_12689462_A_C	14722	Monocyte chemoattractant protein-4 levels	0.00152153	0.00172713	25.4674	42.6787	22.431
rs62336911	T	C	T	C	0.1569	-0.0167897	0.0417	0.0287317	Bladder cancer	0.155602	0.914074	GCST90274824	4	176433708	0.0332	2.29e-06	4_176433708_T_C	14288	Monocyte chemoattractant protein-4 levels	0.00156092	0.00196749	28.163	42.6787	22.3342
rs72825017	T	G	T	G	-0.1997	-0.115893	0.0594	0.0514552	Bladder cancer	0.116311	0.319053	GCST90274824	17	32529710	0.0251	1.77e-15	17_32529710_T_G	14730	Monocyte chemoattractant protein-4 levels	0.00427959	0.00445633	65.9266	42.6787	63.3007
rs72832833	A	G	A	G	-0.0635	0.0668707	0.7811	0.787401	Bladder cancer	0.0630103	0.288569	GCST90274824	10	117669867	0.0143	8.97e-06	10_117669867_A_G	14734	Monocyte chemoattractant protein-4 levels	0.0013367	0.00137889	20.3419	42.6787	19.7186
rs7612912	T	C	T	C	0.1281	-0.0506243	0.6276	0.614078	Bladder cancer	0.0527346	0.337065	GCST90274824	3	42910621	0.012	1.33e-26	3_42910621_T_C	14714	Monocyte chemoattractant protein-4 levels	0.00768622	0.00767045	113.72	42.6787	113.956
rs77609620	C	G	C	G	-0.1093	-0.0537681	0.0716	0.065723	Bladder cancer	0.104718	0.607633	GCST90274824	19	18452787	0.0243	6.86e-06	19_18452787_C_G	14288	Monocyte chemoattractant protein-4 levels	0.00141417	0.00158825	22.7258	42.6787	20.2315
rs8112014	A	G	A	G	-0.0578	-0.037441	0.2923	0.299672	Bladder cancer	0.0561671	0.505027	GCST90274824	19	14773077	0.0126	4.49e-06	19_14773077_A_G	14724	Monocyte chemoattractant protein-4 levels	0.00142734	0.00138218	20.3766	42.6787	21.0433
rs847767	A	G	A	G	0.077	0.0547705	0.8533	0.874531	Bladder cancer	0.0774071	0.479216	GCST90274824	6	40051588	0.0168	4.58e-06	6_40051588_A_G	14733	Monocyte chemoattractant protein-4 levels	0.00142401	0.00148437	21.8988	42.6787	21.0069
rs926646	T	C	T	C	0.1432	0.0217007	0.9545	0.963888	Bladder cancer	0.13809	0.875127	GCST90274824	20	20023326	0.0304	2.47e-06	20_20023326_T_C	14732	Monocyte chemoattractant protein-4 levels	0.00150412	0.00178116	26.2833	42.6787	22.1891
rs1125560	T	C	T	C	-0.0644	0.0576668	0.632	0.64895	Bladder cancer	0.0548207	0.292838	GCST90274825	12	67790676	0.0124	2.06e-07	12_67790676_T_C	13863	Macrophage inflammatory protein 1a levels	0.00194218	0.00192915	26.7917	42.6787	26.9729
rs113448118	A	G	A	G	0.0818	0.184877	0.1528	0.145592	Bladder cancer	0.0733205	0.011686	GCST90274825	7	1108954	0.0179	4.88e-06	7_1108954_A_G	11793	Macrophage inflammatory protein 1a levels	0.001768	0.00173239	20.4621	42.6787	20.8834
rs1143687	T	C	T	C	-0.1229	-0.137794	0.0627	0.0655936	Bladder cancer	0.103597	0.183484	GCST90274825	16	81922813	0.024	3.04e-07	16_81922813_T_C	14743	Macrophage inflammatory protein 1a levels	0.00177575	0.00177533	26.2167	42.6787	26.2229
rs1295911	A	G	A	G	-0.087	0.0362923	0.8805	0.887665	Bladder cancer	0.0815196	0.656177	GCST90274825	10	12075632	0.0193	6.55e-06	10_12075632_A_G	12799	Macrophage inflammatory protein 1a levels	0.00158536	0.00159282	20.4158	42.6787	20.32
rs147065959	A	C	A	C	0.302	0.0515054	0.985	0.992224	Bladder cancer	0.295908	0.861819	GCST90274825	15	28291907	0.068	8.95e-06	15_28291907_A_C	11438	Macrophage inflammatory protein 1a levels	0.00172176	0.00269508	30.9042	42.6787	19.724
rs2847249	T	C	T	C	-0.0621	-0.0245921	0.2605	0.246359	Bladder cancer	0.0605304	0.684539	GCST90274825	18	12747235	0.0136	4.97e-06	18_12747235_T_C	14294	Macrophage inflammatory protein 1a levels	0.00145673	0.0014858	21.2666	42.6787	20.85
rs2853926	A	G	A	G	-0.0608	-0.102078	0.7392	0.723743	Bladder cancer	0.0572345	0.0745047	GCST90274825	6	31263051	0.0133	4.84e-06	6_31263051_A_G	14743	Macrophage inflammatory protein 1a levels	0.00141567	0.0014253	21.0404	42.6787	20.898
rs4861445	A	G	A	G	0.0588	0.11091	0.3744	0.38065	Bladder cancer	0.0552768	0.0448076	GCST90274825	4	181734829	0.013	6.09e-06	4_181734829_A_G	14295	Macrophage inflammatory protein 1a levels	0.0014293	0.00161963	23.187	42.6787	20.4582
rs56675286	A	C	A	C	-0.1806	0.121026	0.0383	0.033578	Bladder cancer	0.143803	0.400003	GCST90274825	17	34358060	0.0325	2.75e-08	17_34358060_A_C	14743	Macrophage inflammatory protein 1a levels	0.00209042	0.00240272	35.5039	42.6787	30.8794
rs5743604	A	G	A	G	-0.0736	0.00922884	0.7503	0.800325	Bladder cancer	0.0645933	0.886388	GCST90274825	4	38801285	0.0135	4.98e-08	4_38801285_A_G	14737	Macrophage inflammatory protein 1a levels	0.00201309	0.00202973	29.969	42.6787	29.7227
rs574716857	T	C	T	C	-0.1761	0.0905933	0.0346	0.0217869	Bladder cancer	0.178591	0.611968	GCST90274825	14	81471588	0.0396	8.71e-06	14_81471588_T_C	11768	Macrophage inflammatory protein 1a levels	0.00167792	0.00207172	24.4265	42.6787	19.7755
rs66822987	T	C	T	C	0.0653	-0.0605326	0.2284	0.218491	Bladder cancer	0.0627426	0.334657	GCST90274825	3	63106417	0.0144	5.77e-06	3_63106417_T_C	14295	Macrophage inflammatory protein 1a levels	0.00143666	0.00150295	21.514	42.6787	20.5637
rs677925	T	C	T	C	-0.0668	0.0943158	0.7284	0.71614	Bladder cancer	0.0571953	0.099145	GCST90274825	17	15741465	0.0143	2.99e-06	17_15741465_T_C	12411	Macrophage inflammatory protein 1a levels	0.00175542	0.00176556	21.9476	42.6787	21.8213
rs7137828	T	C	T	C	-0.0837	0.02098	0.5247	0.516302	Bladder cancer	0.0513661	0.68295	GCST90274825	12	111932800	0.0133	3.11e-10	12_111932800_T_C	11344	Macrophage inflammatory protein 1a levels	0.00347972	0.0034943	39.7713	42.6787	39.6048
rs7537266	T	C	T	C	0.0615	-0.041161	0.2426	0.25705	Bladder cancer	0.0593046	0.487644	GCST90274825	1	238391155	0.0137	7.15e-06	1_238391155_T_C	14294	Macrophage inflammatory protein 1a levels	0.001408	0.00138994	19.8927	42.6787	20.1516
rs78871521	T	C	T	C	0.1812	-0.125862	0.0304	0.0316716	Bladder cancer	0.145359	0.386563	GCST90274825	16	4774017	0.0371	1.04e-06	16_4774017_T_C	13246	Macrophage inflammatory protein 1a levels	0.00179791	0.00193559	25.6846	42.6787	23.8544
rs7917198	T	G	T	G	-0.0706	0.0927017	0.8397	0.843791	Bladder cancer	0.0710182	0.191783	GCST90274825	10	93675891	0.0159	8.99e-06	10_93675891_T_G	14731	Macrophage inflammatory protein 1a levels	0.00133678	0.00134183	19.7904	42.6787	19.7158
rs8951	T	C	T	C	-0.4102	-0.0337336	0.7695	0.779315	Bladder cancer	0.0621777	0.58745	GCST90274825	17	34415720	0.0135	8.62e-203	17_34415720_T_C	14295	Macrophage inflammatory protein 1a levels	0.0606759	0.0596899	907.305	42.6787	923.259
rs9540456	A	G	A	G	0.0926	0.0590188	0.8776	0.875844	Bladder cancer	0.077766	0.447896	GCST90274825	13	66085374	0.0181	3.12e-07	13_66085374_A_G	14295	Macrophage inflammatory protein 1a levels	0.00182788	0.00184217	26.3787	42.6787	26.1737
rs9911791	A	G	A	G	0.176	0.0271308	0.8208	0.851191	Bladder cancer	0.0726061	0.708649	GCST90274825	17	34820996	0.0162	1.71e-27	17_34820996_A_G	14295	Macrophage inflammatory protein 1a levels	0.00819031	0.00911236	131.441	42.6787	118.031
rs10732827	A	G	A	G	0.0558	-0.0418625	0.3498	0.361419	Bladder cancer	0.0534763	0.433731	GCST90274826	10	85891907	0.0124	6.8e-06	10_85891907_A_G	14742	Matrix metalloproteinase-1 levels	0.00137193	0.00141633	20.9063	42.6787	20.25
rs10978641	A	T	A	T	0.0649	0.0800543	0.7462	0.742076	Bladder cancer	0.0603067	0.184359	GCST90274826	9	109554196	0.014	3.56e-06	9_109554196_A_T	14296	Matrix metalloproteinase-1 levels	0.00150116	0.00159539	22.8409	42.6787	21.4898
rs10990535	T	C	T	C	0.0703	0.0327273	0.253	0.23557	Bladder cancer	0.0606054	0.589192	GCST90274826	9	99091009	0.0135	1.91e-07	9_99091009_T_C	14734	Matrix metalloproteinase-1 levels	0.00183731	0.00186802	27.5712	42.6787	27.1171
rs116350236	A	T	A	T	0.0639	0.0112983	0.3845	0.379751	Bladder cancer	0.0529199	0.830938	GCST90274826	12	124668322	0.0142	6.8e-06	12_124668322_A_T	10717	Matrix metalloproteinase-1 levels	0.00188631	0.00193266	20.7486	42.6787	20.25
rs11673125	T	C	T	C	-0.0585	-0.00905488	0.296	0.304618	Bladder cancer	0.0558344	0.871169	GCST90274826	19	14763748	0.0127	4.1e-06	19_14763748_T_C	14741	Matrix metalloproteinase-1 levels	0.00143751	0.00142628	21.052	42.6787	21.218
rs116889819	A	G	A	G	-0.176	0.0701869	0.0455	0.0465096	Bladder cancer	0.121724	0.564205	GCST90274826	11	102806398	0.03	4.45e-09	11_102806398_A_G	14744	Matrix metalloproteinase-1 levels	0.00232924	0.00269056	39.7712	42.6787	34.4178
rs12122036	A	T	A	T	-0.1077	-0.0531119	0.0741	0.0689383	Bladder cancer	0.102412	0.604032	GCST90274826	1	109101434	0.024	7.21e-06	1_109101434_A_T	14296	Matrix metalloproteinase-1 levels	0.00140684	0.00159164	22.7871	42.6787	20.1377
rs12141791	A	G	A	G	0.0859	0.110256	0.6981	0.705375	Bladder cancer	0.056302	0.0501949	GCST90274826	1	156419786	0.013	3.9e-11	1_156419786_A_G	14296	Matrix metalloproteinase-1 levels	0.00304524	0.00311026	44.5968	42.6787	43.6616
rs12367368	T	G	T	G	0.0861	-0.0788141	0.1146	0.103418	Bladder cancer	0.0846318	0.35172	GCST90274826	12	83594043	0.0186	3.67e-06	12_83594043_T_G	14744	Matrix metalloproteinase-1 levels	0.00145142	0.00150439	22.2111	42.6787	21.4279
rs12380451	T	C	T	C	-0.0593	0.0791615	0.7098	0.703159	Bladder cancer	0.0561408	0.158524	GCST90274826	9	9191014	0.0133	8.25e-06	9_9191014_T_C	14296	Matrix metalloproteinase-1 levels	0.00138883	0.00144868	20.7375	42.6787	19.8795
rs141782294	A	G	A	G	0.3767	-0.0984121	0.9777	0.988851	Bladder cancer	0.248658	0.692272	GCST90274826	11	102354473	0.0445	2.56e-17	11_102354473_A_G	14731	Matrix metalloproteinase-1 levels	0.00484161	0.00618773	91.7066	42.6787	71.6591
rs148908824	A	G	A	G	-0.2306	-0.0881853	0.0214	0.0204114	Bladder cancer	0.182905	0.629708	GCST90274826	12	24806965	0.0517	8.18e-06	12_24806965_A_G	12935	Matrix metalloproteinase-1 levels	0.00153593	0.00222724	28.8692	42.6787	19.8947
rs149819211	A	G	A	G	-0.1601	0.0907267	0.0417	0.0197686	Bladder cancer	0.183502	0.621012	GCST90274826	1	21336393	0.0351	5.08e-06	1_21336393_A_G	14744	Matrix metalloproteinase-1 levels	0.00140929	0.00204857	30.262	42.6787	20.805
rs188626385	T	C	T	C	-0.2509	-0.0490895	0.0177	0.0186875	Bladder cancer	0.189891	0.79601	GCST90274826	7	120591120	0.053	2.2e-06	7_120591120_T_C	12935	Matrix metalloproteinase-1 levels	0.00172981	0.00218901	28.3726	42.6787	22.4104
rs2155053	T	C	T	C	-0.3212	0.0876713	0.9461	0.942187	Bladder cancer	0.109709	0.424216	GCST90274826	11	102604607	0.0264	4.68e-34	11_102604607_T_C	14741	Matrix metalloproteinase-1 levels	0.00994341	0.0105222	156.736	42.6787	148.028
rs2229629	A	G	A	G	-0.3153	-0.344624	0.0135	0.0119377	Bladder cancer	0.235756	0.1438	GCST90274826	2	75116527	0.0673	2.8e-06	2_75116527_A_G	10887	Matrix metalloproteinase-1 levels	0.0020124	0.00264794	28.8994	42.6787	21.9492
rs2926741	T	C	T	C	-0.0704	0.120714	0.3436	0.367377	Bladder cancer	0.0534298	0.0238646	GCST90274826	12	57098597	0.0126	2.31e-08	12_57098597_T_C	14296	Matrix metalloproteinase-1 levels	0.00217923	0.00223561	32.0275	42.6787	31.2179
rs372555709	T	C	T	C	0.2514	0.0512724	0.0194	0.0103517	Bladder cancer	0.257535	0.842193	GCST90274826	9	87142351	0.0566	8.93e-06	9_87142351_T_C	11282	Matrix metalloproteinase-1 levels	0.00174594	0.00240466	27.19	42.6787	19.7287
rs4734879	A	G	A	G	0.1136	-0.058246	0.7422	0.725028	Bladder cancer	0.0574447	0.310607	GCST90274826	8	106583124	0.0137	1.11e-16	8_106583124_A_G	14296	Matrix metalloproteinase-1 levels	0.00478716	0.00493845	70.9405	42.6787	68.7568
rs58811245	T	C	T	C	-0.1051	-0.0815614	0.9266	0.937229	Bladder cancer	0.10567	0.440202	GCST90274826	20	60732102	0.0234	7.07e-06	20_60732102_T_C	14723	Matrix metalloproteinase-1 levels	0.00136849	0.00150253	22.1521	42.6787	20.1731
rs6717478	A	T	A	T	0.1548	-0.251624	0.966	0.966001	Bladder cancer	0.143085	0.0786514	GCST90274826	2	63657053	0.0338	4.65e-06	2_63657053_A_T	14742	Matrix metalloproteinase-1 levels	0.001421	0.00157408	23.2386	42.6787	20.9753
rs7219205	A	G	A	G	0.0569	-0.000214387	0.5023	0.482054	Bladder cancer	0.0523286	0.996731	GCST90274826	17	4351312	0.0121	2.57e-06	17_4351312_A_G	14296	Matrix metalloproteinase-1 levels	0.00154465	0.00161877	23.1762	42.6787	22.1133
rs72777396	A	G	A	G	0.1657	0.0789584	0.9671	0.968961	Bladder cancer	0.147472	0.592364	GCST90274826	2	10923106	0.0364	5.31e-06	2_10923106_A_G	14744	Matrix metalloproteinase-1 levels	0.00140371	0.0017472	25.8023	42.6787	20.7225
rs77095316	T	G	T	G	-0.1416	-0.031241	0.0705	0.0704813	Bladder cancer	0.100171	0.755134	GCST90274826	11	102572180	0.0238	2.69e-09	11_102572180_T_G	14744	Matrix metalloproteinase-1 levels	0.00239538	0.00262782	38.8413	42.6787	35.3975
rs873675	T	C	T	C	0.1234	0.0459946	0.0684	0.06284	Bladder cancer	0.106376	0.665468	GCST90274826	3	64991445	0.0234	1.34e-07	3_64991445_T_C	14742	Matrix metalloproteinase-1 levels	0.00188314	0.00194064	28.6607	42.6787	27.8098
rs9524612	T	C	T	C	-0.072	0.00176626	0.177	0.184564	Bladder cancer	0.0674406	0.979106	GCST90274826	13	95429892	0.0162	8.81e-06	13_95429892_T_C	14296	Matrix metalloproteinase-1 levels	0.00138001	0.00151032	21.6211	42.6787	19.7531
rs10971521	A	G	A	G	-0.0585	0.0975699	0.2739	0.269676	Bladder cancer	0.0580757	0.0929485	GCST90274827	9	33470408	0.0132	9.34e-06	9_33470408_A_G	14725	Matrix metalloproteinase-10 levels	0.00133226	0.00136123	20.0686	42.6787	19.641
rs112062276	T	G	T	G	0.1203	-0.22249	0.0601	0.0541397	Bladder cancer	0.113446	0.0498559	GCST90274827	6	134160498	0.0249	1.36e-06	6_134160498_T_G	14733	Matrix metalloproteinase-10 levels	0.00158202	0.001635	24.1246	42.6787	23.3417
rs11225354	T	C	T	C	0.2957	0.0344264	0.879	0.87785	Bladder cancer	0.0785755	0.661291	GCST90274827	11	102510046	0.0181	5.38e-60	11_102510046_T_C	14296	Matrix metalloproteinase-10 levels	0.0183298	0.0185997	270.903	42.6787	266.898
rs112327130	C	G	C	G	-0.2862	-0.0442069	0.0153	0.00974905	Bladder cancer	0.26316	0.866595	GCST90274827	8	77953661	0.0608	2.51e-06	8_77953661_C_G	12456	Matrix metalloproteinase-10 levels	0.00177603	0.00246811	30.8139	42.6787	22.1581
rs112966738	T	C	T	C	0.2201	-0.033691	0.9801	0.983749	Bladder cancer	0.20554	0.869798	GCST90274827	9	81249363	0.0486	5.93e-06	9_81249363_T_C	14296	Matrix metalloproteinase-10 levels	0.00143282	0.0018897	27.0626	42.6787	20.5101
rs113958571	A	G	A	G	-0.2315	0.26894	0.0188	0.0189718	Bladder cancer	0.187176	0.150766	GCST90274827	20	20711695	0.0503	4.18e-06	20_20711695_A_G	14296	Matrix metalloproteinase-10 levels	0.00147968	0.00197718	28.3179	42.6787	21.182
rs11771706	A	C	A	C	0.2157	0.319371	0.9813	0.984844	Bladder cancer	0.208925	0.126353	GCST90274827	7	13720685	0.0482	7.64e-06	7_13720685_A_C	14744	Matrix metalloproteinase-10 levels	0.00135663	0.00170755	25.2158	42.6787	20.0266
rs12567824	A	C	A	C	0.07	0.0225706	0.822	0.823143	Bladder cancer	0.0671094	0.736625	GCST90274827	1	159990022	0.0153	4.76e-06	1_159990022_A_C	14296	Matrix metalloproteinase-10 levels	0.00146226	0.0014339	20.5256	42.6787	20.9321
rs1356799	T	G	T	G	-0.069	0.0215972	0.7974	0.808665	Bladder cancer	0.0660724	0.743764	GCST90274827	2	140567666	0.015	4.22e-06	2_140567666_T_G	13869	Matrix metalloproteinase-10 levels	0.0015236	0.00153831	21.3646	42.6787	21.16
rs139747874	T	C	T	C	-0.2523	-0.0458966	0.9867	0.986815	Bladder cancer	0.224967	0.838341	GCST90274827	20	37234290	0.0567	8.6e-06	20_37234290_T_C	13422	Matrix metalloproteinase-10 levels	0.00147325	0.00167071	22.4585	42.6787	19.8001
rs142915220	A	G	A	G	-0.3256	-0.259803	0.9794	0.984068	Bladder cancer	0.203408	0.201513	GCST90274827	11	102881952	0.0494	4.37e-11	11_102881952_A_G	13809	Matrix metalloproteinase-10 levels	0.00313654	0.00427785	59.3181	42.6787	43.4425
rs17099622	A	G	A	G	-0.2064	0.111544	0.9296	0.929222	Bladder cancer	0.100404	0.26659	GCST90274827	11	102700352	0.0233	8.12e-19	11_102700352_A_G	14296	Matrix metalloproteinase-10 levels	0.00545979	0.00557594	80.1494	42.6787	78.4707
rs17860955	T	C	T	C	1.1371	0.163098	0.983	0.979094	Bladder cancer	0.178709	0.361427	GCST90274827	11	102649482	0.047	2.6e-129	11_102649482_T_C	14256	Matrix metalloproteinase-10 levels	0.0394446	0.0432145	643.801	42.6787	585.331
rs181816009	A	G	A	G	-0.1769	0.106958	0.0368	0.0225681	Bladder cancer	0.174918	0.540884	GCST90274827	6	31423412	0.0358	7.76e-07	6_31423412_A_G	11985	Matrix metalloproteinase-10 levels	0.00203348	0.00221845	26.6428	42.6787	24.4168
rs192820441	A	G	A	G	0.2701	-0.48735	0.9874	0.991266	Bladder cancer	0.280767	0.0826022	GCST90274827	12	117560675	0.0603	7.49e-06	12_117560675_A_G	13394	Matrix metalloproteinase-10 levels	0.00149596	0.00181528	24.3544	42.6787	20.0639
rs2584662	A	C	A	C	-0.0597	0.0497213	0.585	0.578092	Bladder cancer	0.0524032	0.342712	GCST90274827	17	47470487	0.0122	9.91e-07	17_47470487_A_C	14296	Matrix metalloproteinase-10 levels	0.00167243	0.00173054	24.7793	42.6787	23.9458
rs34387740	A	G	A	G	0.0845	0.0228139	0.1751	0.17061	Bladder cancer	0.0691978	0.741633	GCST90274827	9	136375396	0.019	8.69e-06	9_136375396_A_G	11345	Matrix metalloproteinase-10 levels	0.00174069	0.00206267	23.4453	42.6787	19.7791
rs3742926	T	C	T	C	-0.0912	0.0227742	0.0978	0.0903083	Bladder cancer	0.0898602	0.799928	GCST90274827	14	33014869	0.0196	3.27e-06	14_33014869_T_C	14744	Matrix metalloproteinase-10 levels	0.00146651	0.00146778	21.6698	42.6787	21.651
rs55804377	A	G	A	G	-0.2185	-0.0791752	0.0185	0.014242	Bladder cancer	0.21748	0.715814	GCST90274827	10	1063892	0.0469	3.18e-06	10_1063892_A_G	14741	Matrix metalloproteinase-10 levels	0.00147045	0.00173378	25.5986	42.6787	21.7049
rs55942631	T	G	T	G	0.1032	0.0798723	0.9147	0.917778	Bladder cancer	0.0951936	0.401441	GCST90274827	8	99434029	0.023	7.22e-06	8_99434029_T_G	14296	Matrix metalloproteinase-10 levels	0.0014065	0.00166195	23.7954	42.6787	20.1328
rs72699188	C	G	C	G	-0.0931	-0.0262606	0.8507	0.838398	Bladder cancer	0.0698198	0.706828	GCST90274827	9	6176871	0.0166	2.04e-08	9_6176871_C_G	14744	Matrix metalloproteinase-10 levels	0.00212912	0.00220174	32.5296	42.6787	31.4545
rs7683424	A	G	A	G	0.054	0.0830864	0.4046	0.419713	Bladder cancer	0.0519397	0.109671	GCST90274827	4	187115945	0.0121	8.09e-06	4_187115945_A_G	14296	Matrix metalloproteinase-10 levels	0.00139142	0.00140492	20.1102	42.6787	19.9167
rs7966257	C	G	C	G	-0.0819	0.0851501	0.1335	0.135243	Bladder cancer	0.0750017	0.256246	GCST90274827	12	111251437	0.0178	4.2e-06	12_111251437_C_G	14295	Matrix metalloproteinase-10 levels	0.00147898	0.00155184	22.215	42.6787	21.1703
rs10412462	A	C	A	C	-0.1731	-0.211682	0.0363	0.0314659	Bladder cancer	0.147349	0.150831	GCST90274828	19	14691684	0.0366	2.25e-06	19_14691684_A_C	11790	Neurturin levels	0.00189395	0.00209639	24.7642	42.6787	22.3682
rs113580784	A	G	A	G	-0.2288	-0.145091	0.0208	0.0155908	Bladder cancer	0.209536	0.488662	GCST90274828	20	55469957	0.0495	3.8e-06	20_55469957_A_G	11768	Neurturin levels	0.00181253	0.00213244	25.1439	42.6787	21.3649
rs117216753	T	C	T	C	0.2114	0.0578412	0.0291	0.0280028	Bladder cancer	0.155859	0.710554	GCST90274828	15	28183982	0.0475	8.57e-06	15_28183982_T_C	9339	Neurturin levels	0.00211687	0.00252527	23.6381	42.6787	19.8072
rs11766761	T	C	T	C	0.0729	0.00176637	0.8184	0.833959	Bladder cancer	0.0688936	0.979545	GCST90274828	7	41670710	0.0165	9.95e-06	7_41670710_T_C	11783	Neurturin levels	0.00165419	0.00157967	18.6395	42.6787	19.5203
rs143131035	T	C	T	C	-0.4361	0.0878031	0.0118	0.010134	Bladder cancer	0.253643	0.729217	GCST90274828	4	43313220	0.0867	4.91e-07	4_43313220_T_C	7585	Neurturin levels	0.00332542	0.00443536	33.7832	42.6787	25.3008
rs148658700	A	T	A	T	-0.3205	-0.215716	0.0145	0.0103067	Bladder cancer	0.258186	0.403432	GCST90274828	9	138510992	0.0713	6.95e-06	9_138510992_A_T	11343	Neurturin levels	0.00177849	0.00293569	33.3917	42.6787	20.2058
rs182274799	A	G	A	G	0.1565	0.0730273	0.0646	0.0625079	Bladder cancer	0.1063	0.492087	GCST90274828	11	10358788	0.031	4.46e-07	11_10358788_A_G	9461	Neurturin levels	0.00268715	0.00295998	28.0816	42.6787	25.4862
rs192427410	T	G	T	G	0.3743	-0.188955	0.0252	0.00497941	Bladder cancer	0.369262	0.608855	GCST90274828	8	43185781	0.0786	1.92e-06	8_43185781_T_G	8783	Neurturin levels	0.00257591	0.00688313	60.8596	42.6787	22.6775
rs28572049	A	G	A	G	0.0707	0.0706333	0.2983	0.289293	Bladder cancer	0.0581816	0.224743	GCST90274828	15	95039717	0.016	9.93e-06	15_95039717_A_G	9461	Neurturin levels	0.00205996	0.00209254	19.8348	42.6787	19.5254
rs28759830	T	C	T	C	-0.1778	-0.242038	0.9507	0.96191	Bladder cancer	0.136566	0.0763432	GCST90274828	16	21786236	0.037	1.54e-06	16_21786236_T_C	9461	Neurturin levels	0.00243532	0.00296336	28.1137	42.6787	23.0919
rs29630	T	C	T	C	-0.074	0.0494097	0.2493	0.263028	Bladder cancer	0.0583024	0.396731	GCST90274828	5	171026588	0.0159	3.25e-06	5_171026588_T_C	11343	Neurturin levels	0.00190629	0.00204966	23.293	42.6787	21.6605
rs4360502	A	G	A	G	-0.0652	0.101496	0.3445	0.335121	Bladder cancer	0.0548576	0.0642885	GCST90274828	1	214886642	0.0141	3.76e-06	1_214886642_A_G	11342	Neurturin levels	0.00188203	0.00191994	21.814	42.6787	21.3824
rs4723879	A	G	A	G	-0.0722	-0.104197	0.2241	0.207975	Bladder cancer	0.0638516	0.102708	GCST90274828	7	4596494	0.0163	9.45e-06	7_4596494_A_G	11343	Neurturin levels	0.00172702	0.00181281	20.5964	42.6787	19.62
rs48221	T	C	T	C	-0.0596	-0.0657765	0.3995	0.422008	Bladder cancer	0.0542236	0.225106	GCST90274828	3	8648067	0.0134	8.68e-06	3_8648067_T_C	11784	Neurturin levels	0.00167624	0.00170433	20.1146	42.6787	19.7826
rs61589891	A	G	A	G	-0.1563	0.0178859	0.0545	0.0445947	Bladder cancer	0.127926	0.888806	GCST90274828	6	73859555	0.0348	7.08e-06	6_73859555_A_G	9021	Neurturin levels	0.00223167	0.00251771	22.7646	42.6787	20.1725
rs62120726	A	G	A	G	0.0786	-0.0740336	0.8077	0.793734	Bladder cancer	0.063414	0.243023	GCST90274828	2	15734798	0.0172	4.88e-06	2_15734798_A_G	11343	Neurturin levels	0.00183797	0.00191913	21.8067	42.6787	20.8828
rs7202385	A	T	A	T	0.0746	-0.0677824	0.6725	0.691304	Bladder cancer	0.0567614	0.232414	GCST90274828	16	26080883	0.0157	2.02e-06	16_26080883_A_T	9460	Neurturin levels	0.00238146	0.00245138	23.2422	42.6787	22.5776
rs75066660	A	G	A	G	0.2148	0.0236078	0.0197	0.0156864	Bladder cancer	0.208787	0.909974	GCST90274828	5	92157390	0.0476	6.4e-06	5_92157390_A_G	11789	Neurturin levels	0.00172465	0.00178207	21.0427	42.6787	20.3636
rs76777800	T	C	T	C	0.3387	0.171244	0.0176	0.0104251	Bladder cancer	0.256872	0.504995	GCST90274828	3	73067086	0.0738	4.44e-06	3_73067086_T_C	6941	Neurturin levels	0.00302625	0.00396699	27.6366	42.6787	21.0629
rs76807861	A	G	A	G	-0.2154	0.107591	0.023	0.0179505	Bladder cancer	0.194568	0.580281	GCST90274828	6	153460965	0.0486	9.33e-06	6_153460965_A_G	10901	Neurturin levels	0.00179908	0.00208518	22.7739	42.6787	19.6435
rs77216559	T	C	T	C	0.1667	3.48e-05	0.958	0.961263	Bladder cancer	0.132901	0.999791	GCST90274828	11	4475910	0.034	9.44e-07	11_4475910_T_C	11791	Neurturin levels	0.00203494	0.00223623	26.422	42.6787	24.0388
rs8033310	T	C	T	C	0.1332	0.103656	0.9133	0.950599	Bladder cancer	0.123938	0.402956	GCST90274828	15	24046105	0.0286	3.2e-06	15_24046105_T_C	11343	Neurturin levels	0.00190895	0.00280977	31.9554	42.6787	21.6908
rs908372	C	G	C	G	-0.0622	-0.0411213	0.3324	0.327255	Bladder cancer	0.0554433	0.45828	GCST90274828	2	172434373	0.0136	4.8e-06	2_172434373_C_G	11773	Neurturin levels	0.00177386	0.00171707	20.2464	42.6787	20.9172
rs1009409	T	G	T	G	0.0552	-0.0844246	0.3857	0.377932	Bladder cancer	0.0540728	0.118449	GCST90274829	13	69789253	0.0121	5.07e-06	13_69789253_T_G	14295	Neurotrophin-3 levels	0.00145396	0.0014439	20.6676	42.6787	20.8117
rs10121142	A	T	A	T	-0.0633	-0.00293134	0.263	0.240296	Bladder cancer	0.0605669	0.961399	GCST90274829	9	32900305	0.0139	5.26e-06	9_32900305_A_T	12844	Neurotrophin-3 levels	0.00161229	0.00155332	19.9788	42.6787	20.7385
rs1017982	A	G	A	G	0.0623	0.156358	0.2606	0.254351	Bladder cancer	0.0614478	0.0109413	GCST90274829	1	238095957	0.014	8.59e-06	1_238095957_A_G	14296	Neurotrophin-3 levels	0.00138346	0.00149575	21.4123	42.6787	19.8025
rs10780690	T	G	T	G	0.0557	-0.00989309	0.5265	0.522903	Bladder cancer	0.0517563	0.84841	GCST90274829	9	87478172	0.012	3.46e-06	9_87478172_T_G	14296	Neurotrophin-3 levels	0.00150501	0.00154689	22.1455	42.6787	21.5451
rs11225042	A	C	A	C	-0.0973	0.0294668	0.8737	0.907197	Bladder cancer	0.0908806	0.745759	GCST90274829	11	101727684	0.0203	1.64e-06	11_101727684_A_C	12412	Neurotrophin-3 levels	0.00184782	0.0020894	25.9837	42.6787	22.9738
rs112418830	T	C	T	C	0.1366	0.0409137	0.0567	0.0540281	Bladder cancer	0.113838	0.719294	GCST90274829	6	151293888	0.0263	2.06e-07	6_151293888_T_C	14296	Neurotrophin-3 levels	0.00188372	0.00199602	28.5881	42.6787	26.9768
rs116906009	T	C	T	C	-0.1839	-0.0522768	0.9745	0.975163	Bladder cancer	0.164152	0.750132	GCST90274829	12	118360925	0.041	7.28e-06	12_118360925_T_C	14727	Neurotrophin-3 levels	0.00136442	0.0016808	24.7914	42.6787	20.1185
rs11756802	A	T	A	T	-0.1414	-0.17932	0.0444	0.0430067	Bladder cancer	0.127204	0.158627	GCST90274829	6	7170084	0.0319	9.31e-06	6_7170084_A_T	14296	Neurotrophin-3 levels	0.00137267	0.00169663	24.2929	42.6787	19.648
rs12517801	A	G	A	G	-0.0555	-0.0130317	0.3609	0.3476	Bladder cancer	0.0540279	0.809398	GCST90274829	5	1731054	0.0121	4.5e-06	5_1731054_A_G	14726	Neurotrophin-3 levels	0.00142682	0.00142093	20.9515	42.6787	21.0385
rs145686993	C	G	C	G	-0.2464	-0.14091	0.0161	0.00819929	Bladder cancer	0.281769	0.617011	GCST90274829	2	46306174	0.0539	4.84e-06	2_46306174_C_G	14257	Neurotrophin-3 levels	0.00146386	0.00192348	27.4721	42.6787	20.898
rs146532158	T	C	T	C	-0.1859	-0.185104	0.0249	0.0220642	Bladder cancer	0.175921	0.292707	GCST90274829	10	115833862	0.0386	1.46e-06	10_115833862_T_C	14741	Neurotrophin-3 levels	0.00157121	0.00167818	24.7762	42.6787	23.1945
rs17537796	A	C	A	C	-0.2571	-0.147712	0.9866	0.987321	Bladder cancer	0.230043	0.520805	GCST90274829	7	40026172	0.0553	3.33e-06	7_40026172_A_C	14254	Neurotrophin-3 levels	0.00151433	0.00174775	24.9526	42.6787	21.6149
[truncated: 611 more rows]
