# Supplementary material for: Genetically predicted 91 circulating inflammatory proteins in relation to risk of urological malignancies: a Mendelian randomization study
Source: Aging (Albany NY). 2024 Jun 13;16(12):10366–79. doi: 10.18632/aging.205934 (PMC11236305; doi:10.18632/aging.205934)
Supplement: Supplementary Table 3 [file aging-16-205934-s004.xlsx]

## Sheet: 前列腺癌SNP
Supplementary Table 3. Detailed information of genetic instruments of 91 plasma proteins for effect on prostate cancer.
SNP	effect_allele.exposure	other_allele.exposure	effect_allele.outcome	other_allele.outcome	beta.exposure	beta.outcome	eaf.exposure	eaf.outcome	outcome	chr.outcome	pos.outcome	se.outcome	pval.outcome	id.exposure	chr.exposure	pos.exposure	se.exposure	pval.exposure	exposure	rsq.exposure	rsq.outcome	steiger_pval	R2	F	FMean	F_pow_beta_se
rs1034059	A	G	A	G	0.066	0.0078	0.6982	0.706	Prostate cancer	6	158193698	0.0109	0.4771	GCST90274758	6	158193698	0.0146	6.17e-06	Eukaryotic translation initiation factor 4E-binding protein 1 levels	0.0014284	3.65e-06	4.35e-05	0.00183576	26.274	40.9189	20.4354
rs10513018	A	G	A	G	-0.0875	0.0009	0.8986	0.8953	Prostate cancer	3	136674468	0.0134	0.9493	GCST90274758	3	136674468	0.0197	8.93e-06	Eukaryotic translation initiation factor 4E-binding protein 1 levels	0.00137903	3.22e-08	2.56e-05	0.00139525	19.9603	40.9189	19.728
rs10926313	A	G	A	G	-0.0884	0.0161	0.8334	0.8463	Prostate cancer	1	240804510	0.0144	0.2623	GCST90274758	1	240804510	0.0175	4.39e-07	Eukaryotic translation initiation factor 4E-binding protein 1 levels	0.00178297	8.91e-06	7.79e-06	0.00217002	31.0683	40.9189	25.5169
rs112020430	T	C	T	C	0.1784	-0.0046	0.0251	0.0227	Prostate cancer	4	117584424	0.0302	0.8782	GCST90274758	4	117584424	0.0403	9.56e-06	Eukaryotic translation initiation factor 4E-binding protein 1 levels	0.00132835	1.65e-07	3.14e-05	0.00155759	22.9838	40.9189	19.5965
rs115454951	A	C	A	C	-0.1537	-0.0101	0.0384	0.0398	Prostate cancer	1	108736338	0.0209	0.6281	GCST90274758	1	108736338	0.0344	7.89e-06	Eukaryotic translation initiation factor 4E-binding protein 1 levels	0.00166361	1.67e-06	3.3e-05	0.00174463	20.9372	40.9189	19.9632
rs137887001	C	G	C	G	0.2235	0.0485	0.9827	0.9845	Prostate cancer	20	44566861	0.0346	0.1605	GCST90274758	20	44566861	0.0486	4.25e-06	Eukaryotic translation initiation factor 4E-binding protein 1 levels	0.00147819	1.4e-05	7.7e-05	0.00169845	24.3053	40.9189	21.1486
rs139951113	T	C	T	C	0.3201	-0.0535	0.0087	0.0075	Prostate cancer	3	6066466	0.052	0.3039	GCST90274758	3	6066466	0.0722	9.27e-06	Eukaryotic translation initiation factor 4E-binding protein 1 levels	0.00151753	7.55e-06	8.08e-05	0.00176736	22.8978	40.9189	19.6561
rs181095999	T	C	T	C	-0.2226	0.0493	0.0227	0.0171	Prostate cancer	12	23923166	0.0389	0.2051	GCST90274758	12	23923166	0.0474	2.65e-06	Eukaryotic translation initiation factor 4E-binding protein 1 levels	0.0014946	1.15e-05	4.59e-05	0.00219854	32.4646	40.9189	22.0543
rs2731672	T	C	T	C	0.0926	0.0033	0.2679	0.2513	Prostate cancer	5	176842474	0.0095	0.728799	GCST90274758	5	176842474	0.0152	1.11e-09	Eukaryotic translation initiation factor 4E-binding protein 1 levels	0.00314041	8.6e-07	8.86e-09	0.00336353	39.7595	40.9189	37.1137
rs2856226	T	C	T	C	-0.0995	0.0116	0.8975	0.9028	Prostate cancer	17	15470414	0.014	0.4083	GCST90274758	17	15470414	0.0214	3.33e-06	Eukaryotic translation initiation factor 4E-binding protein 1 levels	0.00174008	4.89e-06	2.45e-05	0.00182152	22.6317	40.9189	21.6182
rs356283	T	G	T	G	0.0588	-0.0126	0.6475	0.6428	Prostate cancer	1	80975190	0.0084	0.1368	GCST90274758	1	80975190	0.0123	1.75e-06	Eukaryotic translation initiation factor 4E-binding protein 1 levels	0.00154927	1.6e-05	4.43e-05	0.00157828	23.2816	40.9189	22.8531
rs3733402	A	G	A	G	-0.1305	0.0068	0.5102	0.5164	Prostate cancer	4	187158034	0.0081	0.4017	GCST90274758	4	187158034	0.0116	2.32e-29	Eukaryotic translation initiation factor 4E-binding protein 1 levels	0.00851667	5.03e-06	1.86e-25	0.00851158	126.486	40.9189	126.562
rs5030072	T	C	T	C	0.0594	0.0168	0.5711	0.5628	Prostate cancer	3	186455546	0.0084	0.0469505	GCST90274758	3	186455546	0.0119	5.99e-07	Eukaryotic translation initiation factor 4E-binding protein 1 levels	0.00169049	2.85e-05	3.61e-05	0.00172851	25.4773	40.9189	24.916
rs6963617	T	C	T	C	0.0754	-0.0006	0.2938	0.2898	Prostate cancer	7	17594314	0.0113	0.9555	GCST90274758	7	17594314	0.0142	1.1e-07	Eukaryotic translation initiation factor 4E-binding protein 1 levels	0.0019697	2.01e-08	4.64e-07	0.00235913	33.7823	40.9189	28.1946
rs7490744	T	G	T	G	0.0705	0.0043	0.2217	0.2396	Prostate cancer	13	84976969	0.01	0.666801	GCST90274758	13	84976969	0.0159	9.25e-06	Eukaryotic translation initiation factor 4E-binding protein 1 levels	0.00166601	1.32e-06	3.51e-05	0.00171522	20.2418	40.9189	19.66
rs76686678	T	G	T	G	0.2607	-0.0256	0.015	0.0171	Prostate cancer	2	38198906	0.0322	0.4264	GCST90274758	2	38198906	0.0521	5.62e-07	Eukaryotic translation initiation factor 4E-binding protein 1 levels	0.00169717	4.51e-06	6.37e-06	0.00200835	29.6385	40.9189	25.0384
rs78948504	C	G	C	G	-0.1269	0.0179	0.9352	0.9406	Prostate cancer	8	3936170	0.0173	0.303	GCST90274758	8	3936170	0.0281	6.3e-06	Eukaryotic translation initiation factor 4E-binding protein 1 levels	0.00172843	7.63e-06	5.16e-05	0.00195179	23.0351	40.9189	20.3944
rs112351694	C	G	C	G	0.8874	0.0125	0.0514	0.0498	Prostate cancer	20	43250424	0.0188	0.5046	GCST90274759	20	43250424	0.0253	1.62e-269	Adenosine Deaminase levels	0.0770973	3.15e-06	1.02e-234	0.0767918	1224.98	40.9189	1230.26
rs62319742	A	G	A	G	-0.1228	0.0001	0.055	0.0538	Prostate cancer	4	124581262	0.0181	0.9963	GCST90274759	4	124581262	0.0257	1.77e-06	Adenosine Deaminase levels	0.0015478	2.18e-10	5.56e-06	0.00156755	23.1231	40.9189	22.8313
rs7793526	A	G	A	G	-0.0592	-0.015	0.3435	0.3441	Prostate cancer	7	22805608	0.0084	0.0745693	GCST90274759	7	22805608	0.0122	1.22e-06	Adenosine Deaminase levels	0.00159598	2.27e-05	4.82e-05	0.00158065	23.3198	40.9189	23.5464
rs80212763	T	C	T	C	0.9687	-0.0201	0.0189	0.0168	Prostate cancer	20	43223930	0.0327	0.5384	GCST90274759	20	43223930	0.0448	1.1e-103	Adenosine Deaminase levels	0.0317743	2.69e-06	1.2e-91	0.0348004	513.677	40.9189	467.544
rs10799609	T	C	T	C	-0.1321	0.0147	0.0561	0.0555	Prostate cancer	1	20418323	0.0184	0.4248	GCST90274760	1	20418323	0.0293	6.53e-06	Artemin levels	0.00172315	4.55e-06	4.01e-05	0.0018481	21.8035	40.9189	20.3269
rs114907684	T	C	T	C	-0.3648	-0.0649	0.9881	0.9892	Prostate cancer	16	81582982	0.0441	0.1411	GCST90274760	16	81582982	0.0818	8.21e-06	Artemin levels	0.00239595	1.54e-05	6.77e-05	0.00312959	25.9975	40.9189	19.8885
rs118087756	A	G	A	G	-0.4237	-0.0715	0.0108	0.008	Prostate cancer	6	94484664	0.0564	0.2048	GCST90274760	6	94484664	0.094	6.56e-06	Artemin levels	0.00252627	1.15e-05	4.37e-05	0.00383579	30.8892	40.9189	20.3171
rs118115625	T	C	T	C	0.1703	-0.0015	0.0344	0.0322	Prostate cancer	12	81724190	0.0239	0.9487	GCST90274760	12	81724190	0.0362	2.55e-06	Artemin levels	0.00187585	2.81e-08	6.81e-06	0.0019267	22.7327	40.9189	22.1316
rs12699544	A	G	A	G	0.0803	-0.013	0.1536	0.1629	Prostate cancer	7	13780997	0.0119	0.2728	GCST90274760	7	13780997	0.0181	9.14e-06	Artemin levels	0.00166874	8.51e-06	7.63e-05	0.00167659	19.7751	40.9189	19.6822
rs1329733	A	G	A	G	-0.0674	0.0082	0.5323	0.5222	Prostate cancer	9	92208227	0.0081	0.3067	GCST90274760	9	92208227	0.0136	7.2e-07	Artemin levels	0.00216346	7.31e-06	7.17e-06	0.0022619	25.6809	40.9189	24.5608
rs13303278	A	C	A	C	-0.0664	0.0161	0.5539	0.5543	Prostate cancer	1	921716	0.0094	0.0884504	GCST90274760	1	921716	0.0144	4.01e-06	Artemin levels	0.00206746	2.09e-05	6.28e-05	0.00217886	22.4105	40.9189	21.2623
rs1370215	T	C	T	C	-0.07	-0.0101	0.7417	0.7532	Prostate cancer	18	54688939	0.0094	0.2822	GCST90274760	18	54688939	0.0153	4.76e-06	Artemin levels	0.00184441	8.23e-06	4.03e-05	0.0018775	21.3083	40.9189	20.9321
rs138311590	A	G	A	G	-0.0811	-0.0074	0.84	0.8443	Prostate cancer	4	4424044	0.0114	0.5158	GCST90274760	4	4424044	0.0176	4.07e-06	Artemin levels	0.00180291	3e-06	2.19e-05	0.00176795	20.8209	40.9189	21.2332
rs141429639	A	G	A	G	-0.293	0.0428	0.0147	0.0131	Prostate cancer	8	53903686	0.0396	0.2803	GCST90274760	8	53903686	0.0644	5.37e-06	Artemin levels	0.00182397	8.33e-06	4.51e-05	0.00248686	28.2414	40.9189	20.6997
rs141625055	A	G	A	G	0.1852	0.0314	0.0327	0.0216	Prostate cancer	2	142183922	0.0297	0.2915	GCST90274760	2	142183922	0.0418	9.4e-06	Artemin levels	0.00166605	7.97e-06	7.49e-05	0.00216981	25.5789	40.9189	19.6304
rs142585779	T	C	T	C	0.2119	0.0221	0.038	0.0258	Prostate cancer	9	140239588	0.0306	0.4694	GCST90274760	9	140239588	0.0435	1.11e-06	Artemin levels	0.00230656	3.72e-06	6.43e-06	0.00328285	33.8061	40.9189	23.7292
rs142970662	A	G	A	G	0.311	-0.0372	0.0191	0.0125	Prostate cancer	7	106961661	0.0416	0.3709	GCST90274760	7	106961661	0.0639	1.13e-06	Artemin levels	0.00240343	5.7e-06	7.68e-06	0.00362417	35.7625	40.9189	23.6875
rs148226005	A	G	A	G	0.2112	0.0009	0.9758	0.9777	Prostate cancer	12	130004146	0.0303	0.9756	GCST90274760	12	130004146	0.0451	2.83e-06	Artemin levels	0.00186083	6.29e-09	7.18e-06	0.00210666	24.8329	40.9189	21.9298
rs17340161	A	G	A	G	-0.0873	0.0162	0.8494	0.8591	Prostate cancer	5	103466564	0.0121	0.1821	GCST90274760	5	103466564	0.0189	3.86e-06	Artemin levels	0.0018799	1.28e-05	4.59e-05	0.00194983	22.1308	40.9189	21.3356
rs17491469	A	G	A	G	-0.0897	0.0238	0.1327	0.1314	Prostate cancer	3	189164574	0.012	0.0476398	GCST90274760	3	189164574	0.0197	5.28e-06	Artemin levels	0.00175763	2.8e-05	0.000133446	0.00185206	21.8485	40.9189	20.7325
rs3003450	T	G	T	G	0.0632	-0.0051	0.6627	0.6695	Prostate cancer	1	17628383	0.009	0.5716	GCST90274760	1	17628383	0.0137	3.97e-06	Artemin levels	0.00180634	2.29e-06	1.94e-05	0.00178565	21.0369	40.9189	21.281
rs4561132	A	G	A	G	-0.0716	-0.0051	0.2386	0.2367	Prostate cancer	10	97678022	0.0098	0.601999	GCST90274760	10	97678022	0.0159	6.7e-06	Artemin levels	0.00178706	1.93e-06	2.82e-05	0.00186268	21.138	40.9189	20.2783
rs55885546	A	G	A	G	-0.2047	-0.0074	0.0245	0.0275	Prostate cancer	8	19493177	0.0266	0.781601	GCST90274760	8	19493177	0.044	3.28e-06	Artemin levels	0.00183457	5.52e-07	1.14e-05	0.0020029	23.6335	40.9189	21.6436
rs569463048	T	G	T	G	-0.2687	0.0322	0.028	0.0263	Prostate cancer	11	112934470	0.0302	0.2859	GCST90274760	11	112934470	0.0588	4.88e-06	Artemin levels	0.0026228	8.11e-06	2.71e-05	0.00392997	31.331	40.9189	20.8824
rs59142746	A	G	A	G	-0.1495	-0.0161	0.0532	0.0535	Prostate cancer	3	93510228	0.0184	0.3821	GCST90274760	3	93510228	0.0335	8.09e-06	Artemin levels	0.00210281	5.46e-06	4.17e-05	0.00225155	21.3275	40.9189	19.9156
rs62277657	A	G	A	G	0.0833	-0.0054	0.1972	0.199	Prostate cancer	3	111720183	0.01	0.5924	GCST90274760	3	111720183	0.0166	5.22e-07	Artemin levels	0.00213395	2.08e-06	3.05e-06	0.00219702	25.9269	40.9189	25.181
rs74383279	C	G	C	G	-0.1899	-0.0269	0.9634	0.9776	Prostate cancer	8	112086697	0.0316	0.3936	GCST90274760	8	112086697	0.0421	6.46e-06	Artemin levels	0.00172729	5.17e-06	4.23e-05	0.00254312	29.9808	40.9189	20.3463
rs76672219	A	C	A	C	-0.3226	-0.0071	0.9882	0.989	Prostate cancer	1	225057589	0.0436	0.8708	GCST90274760	1	225057589	0.0682	2.24e-06	Artemin levels	0.00197808	1.89e-07	6.65e-06	0.00242709	27.4661	40.9189	22.3748
rs77502336	C	G	C	G	0.0679	0.0128	0.318	0.3243	Prostate cancer	11	123394636	0.0091	0.1588	GCST90274760	11	123394636	0.0141	1.47e-06	Artemin levels	0.00196589	1.41e-05	2.31e-05	0.00199978	23.5905	40.9189	23.19
rs79259958	T	C	T	C	-0.3099	0.0363	0.0147	0.0167	Prostate cancer	4	40380879	0.0379	0.338	GCST90274760	4	40380879	0.0697	8.74e-06	Artemin levels	0.00198425	6.54e-06	5.16e-05	0.00278201	27.7387	40.9189	19.7687
rs79664530	C	G	C	G	-0.3211	0.0391	0.0125	0.0087	Prostate cancer	1	197189391	0.0469	0.4039	GCST90274760	1	197189391	0.0718	7.74e-06	Artemin levels	0.00184146	4.96e-06	4.43e-05	0.00254541	27.6652	40.9189	20.0001
rs9496445	T	C	T	C	0.0853	-0.0096	0.1545	0.1527	Prostate cancer	6	143047898	0.0116	0.4056	GCST90274760	6	143047898	0.0181	2.44e-06	Artemin levels	0.00188405	4.88e-06	1.75e-05	0.00190095	22.4091	40.9189	22.2096
rs9684768	C	G	C	G	0.0692	0.0013	0.626	0.6349	Prostate cancer	4	156930775	0.0085	0.8823	GCST90274760	4	156930775	0.014	7.7e-07	Artemin levels	0.00215212	1.67e-07	2.47e-06	0.00224227	25.4575	40.9189	24.4318
rs9941952	T	C	T	C	0.0765	-0.0197	0.7151	0.7285	Prostate cancer	22	25646493	0.0116	0.0881292	GCST90274760	22	25646493	0.0167	4.63e-06	Artemin levels	0.00177937	2.06e-05	8.64e-05	0.00238458	28.1384	40.9189	20.9841
rs10860902	C	G	C	G	0.0659	0.0087	0.7403	0.7381	Prostate cancer	12	103075047	0.0091	0.337	GCST90274761	12	103075047	0.0149	9.74e-06	Axin-1 levels	0.00165836	6.52e-06	6.87e-05	0.00166986	19.6972	40.9189	19.5613
rs11202576	A	G	A	G	-0.0767	0.0159	0.7946	0.8027	Prostate cancer	10	89584284	0.011	0.1468	GCST90274761	10	89584284	0.0172	8.22e-06	Axin-1 levels	0.00175003	1.49e-05	9.92e-05	0.0019203	21.8239	40.9189	19.8854
rs115455827	A	G	A	G	0.1447	0.0111	0.9489	0.955	Prostate cancer	5	78787853	0.0204	0.5873	GCST90274761	5	78787853	0.0305	2.09e-06	Axin-1 levels	0.00190544	2.11e-06	1.07e-05	0.00203053	23.9886	40.9189	22.508
rs117097664	A	C	A	C	0.2444	-0.1149	0.0197	0.0161	Prostate cancer	6	151334530	0.0372	0.00201298	GCST90274761	6	151334530	0.0522	2.84e-06	Axin-1 levels	0.00192884	6.8e-05	0.000255237	0.00230705	26.2294	40.9189	21.9211
rs148317708	A	G	A	G	-0.212	-0.0036	0.0295	0.0264	Prostate cancer	18	50513818	0.0252	0.8867	GCST90274761	18	50513818	0.042	4.47e-07	Axin-1 levels	0.0023284	1.46e-07	1.43e-06	0.00257347	28.1671	40.9189	25.4785
rs2470622	A	G	A	G	-0.1229	-0.0224	0.9127	0.9087	Prostate cancer	8	102489704	0.0158	0.1568	GCST90274761	8	102489704	0.0242	3.8e-07	Axin-1 levels	0.0022686	1.43e-05	6.96e-06	0.002407	27.3685	40.9189	25.7913
rs2691530	T	C	T	C	-0.067	-0.0044	0.5969	0.5991	Prostate cancer	7	77960243	0.0083	0.592899	GCST90274761	7	77960243	0.0133	4.71e-07	Axin-1 levels	0.00214764	2e-06	2.75e-06	0.0021602	25.5261	40.9189	25.3774
rs2712427	A	G	A	G	0.0626	-0.0012	0.4935	0.496	Prostate cancer	3	128431622	0.0081	0.8814	GCST90274761	3	128431622	0.0134	2.99e-06	Axin-1 levels	0.00192033	1.56e-07	8.53e-06	0.00195905	22.2651	40.9189	21.8242
rs428324	T	C	T	C	0.0692	0.0029	0.6047	0.5966	Prostate cancer	18	77253338	0.009	0.7472	GCST90274761	18	77253338	0.0148	2.93e-06	Axin-1 levels	0.00212234	7.4e-07	9.55e-06	0.00228933	23.5861	40.9189	21.8619
rs7171268	T	C	T	C	0.1554	-0.0286	0.9514	0.954	Prostate cancer	15	81221771	0.02	0.1533	GCST90274761	15	81221771	0.0329	2.32e-06	Axin-1 levels	0.00196304	1.46e-05	3.32e-05	0.00223322	25.3881	40.9189	22.3105
rs72984228	A	G	A	G	-0.1557	0.0289	0.9611	0.9651	Prostate cancer	11	101331132	0.0226	0.2007	GCST90274761	11	101331132	0.035	8.64e-06	Axin-1 levels	0.00167571	1.17e-05	9.03e-05	0.0018127	21.4105	40.9189	19.7898
rs9962377	T	C	T	C	-0.0843	-0.0076	0.1481	0.1453	Prostate cancer	18	70105531	0.0115	0.5101	GCST90274761	18	70105531	0.0186	5.84e-06	Axin-1 levels	0.00173909	3.11e-06	3.08e-05	0.0017932	21.1816	40.9189	20.5414
rs11025264	T	C	T	C	0.1739	0.0329	0.9748	0.9762	Prostate cancer	11	19837758	0.0336	0.3274	GCST90274762	11	19837758	0.0384	5.94e-06	beta-nerve growth factor levels	0.00138933	6.84e-06	6.21e-05	0.00148575	21.934	40.9189	20.5086
rs117164089	T	C	T	C	-0.271	-0.0079	0.014	0.011	Prostate cancer	19	43780396	0.0447	0.86	GCST90274762	19	43780396	0.0565	1.61e-06	beta-nerve growth factor levels	0.0017115	2.23e-07	5.94e-06	0.00202756	27.2631	40.9189	23.006
rs11778834	T	C	T	C	-0.2284	-0.0091	0.0226	0.0206	Prostate cancer	8	62908374	0.0319	0.774499	GCST90274762	8	62908374	0.0503	5.61e-06	beta-nerve growth factor levels	0.00160335	5.8e-07	2.02e-05	0.00230464	29.6576	40.9189	20.6185
rs12188775	T	G	T	G	0.1213	-0.0003	0.9435	0.9505	Prostate cancer	5	132971762	0.0191	0.988	GCST90274762	5	132971762	0.0247	9.06e-07	beta-nerve growth factor levels	0.00163406	1.76e-09	3.08e-06	0.00156871	23.1512	40.9189	24.1172
rs12259196	A	G	A	G	-0.075	-0.0114	0.1928	0.2027	Prostate cancer	10	89839430	0.0105	0.2783	GCST90274762	10	89839430	0.0148	4.03e-07	beta-nerve growth factor levels	0.00193555	8.4e-06	6.08e-06	0.00175082	23.225	40.9189	25.6802
rs12533747	A	G	A	G	0.1389	-0.0303	0.0802	0.0574	Prostate cancer	7	30944899	0.0231	0.1905	GCST90274762	7	30944899	0.0276	4.84e-07	beta-nerve growth factor levels	0.00176886	1.23e-05	1.11e-05	0.00284644	40.8003	40.9189	25.3272
rs12539643	C	G	C	G	0.1867	0.03	0.966	0.9631	Prostate cancer	7	151019021	0.0227	0.1866	GCST90274762	7	151019021	0.0408	4.74e-06	beta-nerve growth factor levels	0.0018428	1.25e-05	5.38e-05	0.00228968	26.0291	40.9189	20.9396
rs13058191	C	G	C	G	-0.2164	0.0177	0.0256	0.0218	Prostate cancer	22	49775973	0.0354	0.6159	GCST90274762	22	49775973	0.0467	3.59e-06	beta-nerve growth factor levels	0.00150005	1.78e-06	2.03e-05	0.00233626	33.4704	40.9189	21.4724
rs140072192	A	G	A	G	0.2773	0.0404	0.0196	0.0154	Prostate cancer	16	3327943	0.0433	0.35	GCST90274762	16	3327943	0.0602	4.1e-06	beta-nerve growth factor levels	0.00177643	6.21e-06	3.19e-05	0.00295522	35.3395	40.9189	21.2181
rs140882208	T	C	T	C	-0.1722	0.0204	0.0258	0.0243	Prostate cancer	17	47365286	0.0283	0.4719	GCST90274762	17	47365286	0.0388	9.07e-06	beta-nerve growth factor levels	0.00133552	3.7e-06	6.37e-05	0.00149061	21.988	40.9189	19.6971
rs148834134	T	C	T	C	0.2541	-0.0394	0.0235	0.0157	Prostate cancer	21	43942626	0.0426	0.3545	GCST90274762	21	43942626	0.0556	4.87e-06	beta-nerve growth factor levels	0.00155405	6.1e-06	4.29e-05	0.00296333	39.8831	40.9189	20.8862
rs17647697	A	C	A	C	-0.1617	-0.0082	0.9727	0.9759	Prostate cancer	7	130302087	0.0278	0.767901	GCST90274762	7	130302087	0.0352	4.35e-06	beta-nerve growth factor levels	0.0014297	6.2e-07	1.89e-05	0.00138865	20.4957	40.9189	21.1025
rs17689534	A	G	A	G	0.2208	0.0413	0.0229	0.0197	Prostate cancer	4	166807640	0.0337	0.2207	GCST90274762	4	166807640	0.0462	1.76e-06	beta-nerve growth factor levels	0.00169924	1.07e-05	2.64e-05	0.00218174	29.3408	40.9189	22.841
rs183185212	A	C	A	C	-0.2977	0.0096	0.9883	0.9887	Prostate cancer	11	9434918	0.0459	0.8336	GCST90274762	11	9434918	0.0657	5.86e-06	beta-nerve growth factor levels	0.00148496	3.12e-07	2.05e-05	0.00204957	28.3544	40.9189	20.5318
rs1878359	A	G	A	G	0.0626	-0.0072	0.719	0.7285	Prostate cancer	8	122948812	0.0101	0.4772	GCST90274762	8	122948812	0.0126	6.76e-07	beta-nerve growth factor levels	0.00167202	3.62e-06	6.64e-06	0.00158348	23.3744	40.9189	24.6835
rs2237172	A	G	A	G	0.0619	-0.0021	0.7375	0.7395	Prostate cancer	6	16601587	0.0093	0.8206	GCST90274762	6	16601587	0.0136	5.33e-06	beta-nerve growth factor levels	0.00144728	3.64e-07	1.99e-05	0.00148355	21.2359	40.9189	20.7159
rs3128517	T	C	T	C	-0.0775	-0.0056	0.4965	0.4988	Prostate cancer	9	90362040	0.0082	0.4951	GCST90274762	9	90362040	0.0118	5.11e-11	beta-nerve growth factor levels	0.0030089	3.33e-06	1.49e-09	0.00300298	43.0508	40.9189	43.136
rs34559191	T	C	T	C	0.0607	-0.0072	0.3088	0.3129	Prostate cancer	19	16434937	0.0096	0.4533	GCST90274762	19	16434937	0.0124	9.82e-07	beta-nerve growth factor levels	0.00174948	4.01e-06	8.68e-06	0.00157285	21.5395	40.9189	23.9626
rs397081	T	C	T	C	0.1203	0.0273	0.9514	0.9506	Prostate cancer	6	32192617	0.0186	0.1419	GCST90274762	6	32192617	0.0262	4.4e-06	beta-nerve growth factor levels	0.00142817	1.54e-05	9.08e-05	0.00133832	19.7546	40.9189	21.0828
rs4017	T	C	T	C	-0.1187	0.0216	0.9491	0.9519	Prostate cancer	4	164064099	0.0188	0.2515	GCST90274762	4	164064099	0.0258	4.21e-06	beta-nerve growth factor levels	0.00143397	9.41e-06	5.79e-05	0.00136132	20.0933	40.9189	21.1671
rs4087847	T	G	T	G	-0.1546	-0.0416	0.0301	0.0262	Prostate cancer	18	2455418	0.0263	0.1135	GCST90274762	18	2455418	0.0343	6.57e-06	beta-nerve growth factor levels	0.00137628	1.78e-05	0.000145462	0.00139554	20.6004	40.9189	20.3157
rs4980184	T	C	T	C	0.2352	-0.0292	0.9836	0.9849	Prostate cancer	10	125058869	0.0375	0.4358	GCST90274762	10	125058869	0.0521	6.35e-06	beta-nerve growth factor levels	0.00142383	4.32e-06	4.85e-05	0.00178471	25.5544	40.9189	20.3798
rs62092633	T	C	T	C	-0.1249	-0.0142	0.1005	0.1359	Prostate cancer	18	55441626	0.0155	0.3607	GCST90274762	18	55441626	0.0259	1.42e-06	beta-nerve growth factor levels	0.00204619	5.98e-06	1.15e-05	0.00282047	32.0803	40.9189	23.2555
rs62494116	T	C	T	C	0.0578	-0.0005	0.6636	0.6675	Prostate cancer	8	13332042	0.0085	0.9574	GCST90274762	8	13332042	0.0117	7.81e-07	beta-nerve growth factor levels	0.00165444	2.47e-08	2.87e-06	0.00149158	21.9994	40.9189	24.4053
rs6328	A	C	A	C	-0.0797	-0.0029	0.3498	0.3428	Prostate cancer	1	115829943	0.0085	0.7278	GCST90274762	1	115829943	0.0122	6.46e-11	beta-nerve growth factor levels	0.00321736	8.3e-07	8.18e-10	0.00288944	38.3149	40.9189	42.6773
rs7149605	A	G	A	G	0.0862	-0.0371	0.0949	0.093	Prostate cancer	14	94854041	0.0146	0.0108901	GCST90274762	14	94854041	0.0195	9.85e-06	beta-nerve growth factor levels	0.00132494	4.6e-05	0.000624349	0.00127646	18.825	40.9189	19.5409
rs73782207	A	G	A	G	0.0925	0.0133	0.0825	0.081	Prostate cancer	6	150452471	0.0155	0.3894	GCST90274762	6	150452471	0.0205	6.42e-06	beta-nerve growth factor levels	0.00138011	5.25e-06	5.66e-05	0.00129531	19.1072	40.9189	20.3599
rs74639669	A	T	A	T	-0.1748	0.066	0.0281	0.0159	Prostate cancer	18	5679360	0.0339	0.0513795	GCST90274762	18	5679360	0.0386	5.94e-06	beta-nerve growth factor levels	0.00139018	2.7e-05	0.000210087	0.00166894	24.6263	40.9189	20.5073
rs77493302	T	C	T	C	0.0853	0.0196	0.8904	0.8933	Prostate cancer	6	838092	0.0144	0.1731	GCST90274762	6	838092	0.0185	4.01e-06	beta-nerve growth factor levels	0.00144013	1.32e-05	7.34e-05	0.00142012	20.9637	40.9189	21.2596
rs78167655	T	C	T	C	-0.1646	0.0057	0.0262	0.0224	Prostate cancer	4	119266088	0.028	0.8388	GCST90274762	4	119266088	0.0365	6.5e-06	beta-nerve growth factor levels	0.00137768	2.95e-07	2.38e-05	0.00138249	20.4074	40.9189	20.3364
rs9479501	T	G	T	G	0.0629	0.0284	0.2135	0.2215	Prostate cancer	6	153400418	0.0096	0.00299502	GCST90274762	6	153400418	0.0137	4.41e-06	beta-nerve growth factor levels	0.0014293	6.24e-05	0.000551169	0.0013287	19.5938	40.9189	21.0795
rs9599159	T	C	T	C	-0.175	-0.0033	0.9756	0.9766	Prostate cancer	13	67428046	0.0278	0.906	GCST90274762	13	67428046	0.0387	6.13e-06	beta-nerve growth factor levels	0.00138646	1e-07	2.01e-05	0.00145803	21.5053	40.9189	20.4482
rs10024203	A	C	A	C	0.0922	-0.0207	0.094	0.1014	Prostate cancer	4	5786594	0.0148	0.1617	GCST90274763	4	5786594	0.0203	5.58e-06	Caspase 8 levels	0.00139821	1.39e-05	0.000100971	0.00144793	21.3633	40.9189	20.6286
rs1032417	C	G	C	G	-0.0858	-0.0016	0.1545	0.1553	Prostate cancer	12	62645486	0.0112	0.8885	GCST90274763	12	62645486	0.0165	1.99e-07	Caspase 8 levels	0.00188813	1.46e-07	9.18e-07	0.0019233	27.5446	40.9189	27.04
rs1034059	A	G	A	G	0.0681	0.0078	0.6981	0.706	Prostate cancer	6	158193698	0.0109	0.4771	GCST90274763	6	158193698	0.0145	2.65e-06	Caspase 8 levels	0.00154076	3.65e-06	2.09e-05	0.00195481	27.9968	40.9189	22.0576
rs111764025	C	G	C	G	0.1095	0.0286	0.9304	0.9335	Prostate cancer	8	5557775	0.0164	0.0820408	GCST90274763	8	5557775	0.0238	4.21e-06	Caspase 8 levels	0.00143508	2.17e-05	0.000124051	0.00155288	22.9079	40.9189	21.1677
rs11216018	A	G	A	G	-0.0539	0.0061	0.3708	0.3632	Prostate cancer	11	98455719	0.0083	0.465799	GCST90274763	11	98455719	0.0121	8.41e-06	Caspase 8 levels	0.00138628	3.85e-06	5.85e-05	0.00135561	19.4034	40.9189	19.843
rs11695193	A	T	A	T	-0.0806	0.0013	0.1582	0.1474	Prostate cancer	2	231090015	0.0114	0.9112	GCST90274763	2	231090015	0.0162	6.51e-07	Caspase 8 levels	0.00167643	9.27e-08	2.65e-06	0.00173028	25.5502	40.9189	24.7537
rs11709039	T	C	T	C	0.0781	-0.0382	0.856	0.8642	Prostate cancer	3	152332673	0.0119	0.001295	GCST90274763	3	152332673	0.0168	3.34e-06	Caspase 8 levels	0.00146393	7.35e-05	0.000601204	0.00150373	22.1998	40.9189	21.6114
rs12073499	A	C	A	C	-0.0812	0.0049	0.8466	0.8561	Prostate cancer	1	157270515	0.0116	0.6726	GCST90274763	1	157270515	0.0167	1.16e-06	Caspase 8 levels	0.00165135	1.27e-06	6.73e-06	0.00171256	24.5196	40.9189	23.6417
rs13188908	T	C	T	C	0.0668	-0.013	0.1902	0.1904	Prostate cancer	5	179923576	0.0105	0.2153	GCST90274763	5	179923576	0.015	8.45e-06	Caspase 8 levels	0.00134421	1.09e-05	0.000116414	0.00137458	20.281	40.9189	19.8322
rs137887001	C	G	C	G	0.2318	0.0485	0.9827	0.9845	Prostate cancer	20	44566861	0.0346	0.1605	GCST90274763	20	44566861	0.0486	1.85e-06	Caspase 8 levels	0.00158895	1.4e-05	3.86e-05	0.00182694	26.1621	40.9189	22.7486
rs140844269	C	G	C	G	-0.3615	0.0439	0.0099	0.0078	Prostate cancer	11	63817395	0.0571	0.4416	GCST90274763	11	63817395	0.0776	3.19e-06	Caspase 8 levels	0.00175726	4.21e-06	2.17e-05	0.00256189	31.6641	40.9189	21.7017
rs1467702	A	G	A	G	-0.0962	-0.0008	0.0863	0.0803	Prostate cancer	10	129961901	0.0161	0.9593	GCST90274763	10	129961901	0.0215	7.66e-06	Caspase 8 levels	0.0013563	1.76e-08	2.24e-05	0.00145947	21.5455	40.9189	20.0204
rs148608719	A	G	A	G	0.3474	-0.0513	0.0145	0.0123	Prostate cancer	5	180339648	0.0533	0.3355	GCST90274763	5	180339648	0.0683	3.65e-07	Caspase 8 levels	0.00202612	6.6e-06	4.42e-06	0.00344917	44.1049	40.9189	25.8713
rs187405204	T	C	T	C	0.4195	0.1614	0.9851	0.9895	Prostate cancer	7	61833768	0.0774	0.0370297	GCST90274763	7	61833768	0.0912	4.23e-06	Caspase 8 levels	0.00337117	3.1e-05	4.77e-05	0.00516607	32.4816	40.9189	21.158
rs2411067	A	G	A	G	-0.0706	0.0095	0.685	0.6984	Prostate cancer	17	75033876	0.0101	0.3488	GCST90274763	17	75033876	0.0157	6.9e-06	Caspase 8 levels	0.00177954	6.31e-06	4.77e-05	0.002151	24.4514	40.9189	20.2213
rs56097553	A	G	A	G	0.1384	0.0085	0.0405	0.0379	Prostate cancer	12	82467039	0.0223	0.704601	GCST90274763	12	82467039	0.0312	9.17e-06	Caspase 8 levels	0.00133299	1.04e-06	4.11e-05	0.00148868	21.9789	40.9189	19.6772
rs56328050	C	G	C	G	-0.1987	-0.0158	0.8696	0.8766	Prostate cancer	2	202164805	0.012	0.19	GCST90274763	2	202164805	0.0173	1.56e-30	Caspase 8 levels	0.00886967	1.24e-05	8.36e-26	0.00895412	133.185	40.9189	131.918
rs7146962	T	C	T	C	-0.0613	-0.003	0.7483	0.7576	Prostate cancer	14	54145317	0.0093	0.7509	GCST90274763	14	54145317	0.0135	5.61e-06	Caspase 8 levels	0.00144047	7.42e-07	2.37e-05	0.0014155	20.2604	40.9189	20.6183
rs7287303	T	C	T	C	0.0985	-0.01	0.1249	0.1337	Prostate cancer	22	48714112	0.0151	0.5087	GCST90274763	22	48714112	0.0222	9.12e-06	Caspase 8 levels	0.00166711	3.13e-06	4.59e-05	0.00212091	25.0566	40.9189	19.6864
rs73306603	T	C	T	C	0.2044	0.022	0.978	0.9808	Prostate cancer	10	84027526	0.0327	0.5014	GCST90274763	10	84027526	0.0412	7.01e-07	Caspase 8 levels	0.00166715	3.23e-06	6.47e-06	0.00179785	26.5462	40.9189	24.6132
rs7418913	A	G	A	G	-0.0614	-0.0035	0.2714	0.2886	Prostate cancer	1	203643268	0.0104	0.737199	GCST90274763	1	203643268	0.0138	8.62e-06	Caspase 8 levels	0.00138301	8.08e-07	3.55e-05	0.00149096	21.3436	40.9189	19.7961
rs78449258	A	G	A	G	-0.2001	0.0206	0.9804	0.9807	Prostate cancer	9	22742536	0.0293	0.4818	GCST90274763	9	22742536	0.0428	2.94e-06	Caspase 8 levels	0.00148049	3.52e-06	2.34e-05	0.00153881	22.72	40.9189	21.8578
rs114744647	T	C	T	C	0.2107	-0.0247	0.9774	0.9847	Prostate cancer	16	24006879	0.0363	0.4953	GCST90274764	16	24006879	0.0451	2.99e-06	Eotaxin levels	0.00147975	3.3e-06	2.3e-05	0.00196128	28.9425	40.9189	21.8261
rs12075	A	G	A	G	0.0749	0.0063	0.5547	0.5736	Prostate cancer	1	159175354	0.0082	0.4433	GCST90274764	1	159175354	0.0114	5.03e-11	Eotaxin levels	0.0029222	4.21e-06	1.85e-09	0.00277143	40.9339	40.9189	43.1672
rs12453306	C	G	C	G	-0.1089	0.0008	0.9022	0.8971	Prostate cancer	17	77253324	0.0159	0.96	GCST90274764	17	77253324	0.0244	8.08e-06	Eotaxin levels	0.00175456	1.8e-08	1.89e-05	0.0020928	23.7674	40.9189	19.9194
rs139476527	T	G	T	G	0.2826	-0.013	0.0125	0.0129	Prostate cancer	20	49033630	0.0381	0.7322	GCST90274764	20	49033630	0.0606	3.11e-06	Eotaxin levels	0.00167895	8.3e-07	1.29e-05	0.00197161	25.5453	40.9189	21.747
rs139597204	A	C	A	C	-0.3374	-0.0023	0.0128	0.011	Prostate cancer	4	104507060	0.0512	0.9645	GCST90274764	4	104507060	0.0714	2.3e-06	Eotaxin levels	0.00181203	1.44e-08	6.28e-06	0.00287697	35.4917	40.9189	22.3303
rs140965534	T	C	T	C	-0.2283	-0.0855	0.0172	0.0133	Prostate cancer	8	49300287	0.0668	0.2003	GCST90274764	8	49300287	0.0514	8.93e-06	Eotaxin levels	0.00138387	1.17e-05	0.000121836	0.00176212	25.1298	40.9189	19.7281
rs148554043	T	C	T	C	0.4043	0.0213	0.0083	0.01	Prostate cancer	3	175964549	0.0499	0.6693	GCST90274764	3	175964549	0.0898	6.72e-06	Eotaxin levels	0.00172595	1.3e-06	2.61e-05	0.00269089	31.6331	40.9189	20.27
rs151240414	A	G	A	G	0.2299	-0.0108	0.0222	0.0196	Prostate cancer	5	130672061	0.0308	0.724599	GCST90274764	5	130672061	0.0508	6.02e-06	Eotaxin levels	0.00180394	8.77e-07	2.08e-05	0.00229462	26.0647	40.9189	20.481
rs1564995	A	G	A	G	-0.0609	0.0023	0.6155	0.6266	Prostate cancer	11	24773107	0.0104	0.8245	GCST90274764	11	24773107	0.0131	3.34e-06	Eotaxin levels	0.00151073	3.49e-07	1.3e-05	0.00175545	25.119	40.9189	21.6119
rs170520	A	G	A	G	0.0554	-0.0017	0.3264	0.3294	Prostate cancer	18	38337850	0.0086	0.8414	GCST90274764	18	38337850	0.0125	9.34e-06	Eotaxin levels	0.00137336	2.79e-07	3.17e-05	0.00134959	19.3022	40.9189	19.6426
rs2112920	C	G	C	G	0.0817	-0.0348	0.8362	0.8289	Prostate cancer	19	37955248	0.0106	0.001017	GCST90274764	19	37955248	0.016	3.29e-07	Eotaxin levels	0.00182206	7.68e-05	0.000111167	0.00182851	26.1663	40.9189	26.0738
rs2201150	T	C	T	C	0.0785	0.003	0.3561	0.3657	Prostate cancer	3	46258902	0.0085	0.7209	GCST90274764	3	46258902	0.0123	1.75e-10	Eotaxin levels	0.00284343	8.88e-07	2.38e-09	0.00282592	40.4798	40.9189	40.7314
rs2228467	T	C	T	C	-0.3316	-0.0002	0.9289	0.9335	Prostate cancer	3	42906116	0.0166	0.9915	GCST90274764	3	42906116	0.0225	3.69e-49	Eotaxin levels	0.0145303	1.03e-09	2.02e-44	0.0145244	217.112	40.9189	217.202
rs34536806	T	G	T	G	0.1017	-0.0071	0.9023	0.909	Prostate cancer	11	95274487	0.0153	0.644401	GCST90274764	11	95274487	0.0208	1.01e-06	Eotaxin levels	0.00167086	1.54e-06	6.32e-06	0.00182355	26.0952	40.9189	23.9065
rs35543857	A	G	A	G	-0.1138	-0.0043	0.9282	0.934	Prostate cancer	12	105757994	0.0172	0.8045	GCST90274764	12	105757994	0.0244	3.1e-06	Eotaxin levels	0.00152053	4.46e-07	1.27e-05	0.00172616	24.6991	40.9189	21.7523
rs6894241	A	C	A	C	-0.0656	-0.0029	0.2333	0.2309	Prostate cancer	5	118058126	0.0096	0.759899	GCST90274764	5	118058126	0.0137	1.68e-06	Eotaxin levels	0.00155593	6.51e-07	8.16e-06	0.00153949	22.6855	40.9189	22.928
rs73171545	A	G	A	G	-0.0861	-0.0099	0.1199	0.1191	Prostate cancer	22	45003109	0.0134	0.461	GCST90274764	22	45003109	0.0187	4.14e-06	Eotaxin levels	0.00148193	3.89e-06	3.18e-05	0.00156454	22.383	40.9189	21.1994
rs74796877	A	G	A	G	0.2955	0.0371	0.0105	0.0082	Prostate cancer	3	1768047	0.0555	0.5033	GCST90274764	3	1768047	0.0664	8.57e-06	Eotaxin levels	0.00150749	3.19e-06	4.93e-05	0.00181447	23.8455	40.9189	19.8052
rs757973	A	G	A	G	0.2002	-0.0168	0.09	0.0888	Prostate cancer	7	75495667	0.0149	0.2602	GCST90274764	7	75495667	0.0205	1.58e-22	Eotaxin levels	0.00644127	9.06e-06	4.14e-19	0.00656511	97.2176	40.9189	95.3719
rs79432525	T	G	T	G	0.1929	-0.0756	0.9754	0.9763	Prostate cancer	10	128183195	0.0322	0.01874	GCST90274764	10	128183195	0.0422	4.85e-06	Eotaxin levels	0.00146467	3.93e-05	0.0002714	0.00178572	25.483	40.9189	20.8949
rs79684468	T	C	T	C	0.1502	0.0083	0.0433	0.0392	Prostate cancer	3	43179320	0.0226	0.712801	GCST90274764	3	43179320	0.0303	7.16e-07	Eotaxin levels	0.00171735	9.62e-07	4.04e-06	0.0018691	26.7483	40.9189	24.5728
rs9303380	A	G	A	G	0.1213	0.0278	0.0494	0.0437	Prostate cancer	17	54117492	0.022	0.2056	GCST90274764	17	54117492	0.0272	8.21e-06	Eotaxin levels	0.00139037	1.14e-05	0.000111923	0.0013819	19.7664	40.9189	19.8877
rs9940390	T	C	T	C	-0.0818	-0.0223	0.7358	0.7299	Prostate cancer	16	80051931	0.0091	0.01461	GCST90274764	16	80051931	0.0133	7.73e-10	Eotaxin levels	0.00264122	4.28e-05	3.2e-07	0.00260153	37.2572	40.9189	37.8271
rs9976282	A	G	A	G	-0.1678	-0.0019	0.0333	0.0285	Prostate cancer	21	39593226	0.0243	0.9389	GCST90274764	21	39593226	0.0345	1.15e-06	Eotaxin levels	0.0016045	4.36e-08	4.19e-06	0.0018128	26.7329	40.9189	23.6562
rs10242459	A	G	A	G	0.0729	-0.0154	0.8219	0.8182	Prostate cancer	7	3911280	0.0104	0.1387	GCST90274765	7	3911280	0.0154	2.2e-06	C-C motif chemokine 19 levels	0.00151928	1.56e-05	5.22e-05	0.00155585	22.9487	40.9189	22.4085
rs10496135	C	G	C	G	0.1856	-0.1006	0.9689	0.9741	Prostate cancer	2	66640363	0.0259	0.000106001	GCST90274765	2	66640363	0.0384	1.34e-06	C-C motif chemokine 19 levels	0.00163258	0.000107557	0.000621148	0.00207599	29.7193	40.9189	23.3611
rs111317412	A	C	A	C	-0.1236	-0.0046	0.9429	0.9429	Prostate cancer	14	48619204	0.0184	0.8034	GCST90274765	14	48619204	0.0274	6.45e-06	C-C motif chemokine 19 levels	0.00142235	4.46e-07	2.44e-05	0.00164501	23.5393	40.9189	20.3487
rs11174279	A	T	A	T	-0.0694	-0.0014	0.1741	0.1733	Prostate cancer	12	62401393	0.0106	0.8984	GCST90274765	12	62401393	0.0156	8.64e-06	C-C motif chemokine 19 levels	0.00134197	1.24e-07	2.79e-05	0.00138508	20.4278	40.9189	19.7911
rs113539352	C	G	C	G	0.4485	-0.1203	0.992	0.9918	Prostate cancer	3	58516854	0.0558	0.0311	GCST90274765	3	58516854	0.0922	1.15e-06	C-C motif chemokine 19 levels	0.00206468	3.31e-05	4.43e-05	0.00319269	36.6317	40.9189	23.6626
rs115109204	T	C	T	C	0.3784	-0.0339	0.0116	0.0063	Prostate cancer	5	23807519	0.0611	0.579599	GCST90274765	5	23807519	0.0842	6.99e-06	C-C motif chemokine 19 levels	0.00186777	2.19e-06	2.91e-05	0.00328339	35.5544	40.9189	20.1966
rs11574915	A	C	A	C	-0.1464	-0.0022	0.8639	0.8661	Prostate cancer	9	34710084	0.0119	0.8548	GCST90274765	9	34710084	0.017	7.19e-18	C-C motif chemokine 19 levels	0.00500923	2.44e-07	4.36e-16	0.00504004	74.6209	40.9189	74.1625
rs11877886	A	G	A	G	-0.1065	-0.001	0.0669	0.0683	Prostate cancer	18	69226577	0.0162	0.953	GCST90274765	18	69226577	0.0239	8.35e-06	C-C motif chemokine 19 levels	0.00134713	2.72e-08	2.45e-05	0.00141607	20.8741	40.9189	19.8565
rs11961362	T	C	T	C	-0.1185	0.0217	0.0713	0.071	Prostate cancer	6	81004579	0.0155	0.1615	GCST90274765	6	81004579	0.0264	7.17e-06	C-C motif chemokine 19 levels	0.00156559	1.4e-05	0.000100527	0.00185965	23.9392	40.9189	20.1479
rs12521515	A	T	A	T	0.086	-0.0044	0.861	0.8502	Prostate cancer	5	123121314	0.0113	0.6977	GCST90274765	5	123121314	0.0192	7.49e-06	C-C motif chemokine 19 levels	0.00170053	1.08e-06	2.76e-05	0.00177029	20.8875	40.9189	20.0629
rs13212719	A	G	A	G	0.0671	-0.0107	0.8005	0.825	Prostate cancer	6	133835436	0.0113	0.3436	GCST90274765	6	133835436	0.015	7.7e-06	C-C motif chemokine 19 levels	0.00139876	6.39e-06	7.11e-05	0.00143807	20.5738	40.9189	20.0107
rs1328133	A	T	A	T	0.3112	0.0396	0.01	0.0076	Prostate cancer	6	9710127	0.0505	0.4326	GCST90274765	6	9710127	0.0695	7.55e-06	C-C motif chemokine 19 levels	0.00149179	4.38e-06	5.24e-05	0.00191754	25.7828	40.9189	20.0498
rs138108512	A	G	A	G	-0.2939	0.027	0.0119	0.0091	Prostate cancer	14	76855291	0.049	0.5815	GCST90274765	14	76855291	0.0616	1.83e-06	C-C motif chemokine 19 levels	0.00169336	2.16e-06	1.11e-05	0.00203131	27.3157	40.9189	22.7634
rs138440733	A	G	A	G	-0.1724	0.0387	0.0585	0.0477	Prostate cancer	22	17731243	0.0273	0.1565	GCST90274765	22	17731243	0.036	1.68e-06	C-C motif chemokine 19 levels	0.00184576	1.43e-05	2.86e-05	0.00327401	40.7377	40.9189	22.9335
rs138618048	A	G	A	G	-0.2066	-0.0004	0.0209	0.0159	Prostate cancer	14	100142541	0.0364	0.9923	GCST90274765	14	100142541	0.046	7.08e-06	C-C motif chemokine 19 levels	0.00141406	8.61e-10	1.91e-05	0.00174688	24.9279	40.9189	20.1718
rs1415763	C	G	C	G	0.0757	-0.0016	0.1687	0.1682	Prostate cancer	6	125027776	0.0113	0.8876	GCST90274765	6	125027776	0.0157	1.42e-06	C-C motif chemokine 19 levels	0.00157592	1.43e-07	5.58e-06	0.00160729	23.7119	40.9189	23.2484
rs147708384	T	C	T	C	-0.2707	0.0375	0.0151	0.0119	Prostate cancer	17	14918425	0.0443	0.3979	GCST90274765	17	14918425	0.0574	2.4e-06	C-C motif chemokine 19 levels	0.00160918	5.11e-06	2.18e-05	0.00217959	30.1419	40.9189	22.2409
rs192686691	C	G	C	G	0.2648	0.0546	0.0195	0.008	Prostate cancer	3	12700866	0.0536	0.3081	GCST90274765	3	12700866	0.0589	6.93e-06	C-C motif chemokine 19 levels	0.00186918	7.4e-06	4.94e-05	0.00268132	29.0173	40.9189	20.2118
rs2070746	T	G	T	G	-0.0575	-0.0166	0.307	0.292	Prostate cancer	19	52249702	0.0092	0.0709807	GCST90274765	19	52249702	0.0128	7.05e-06	C-C motif chemokine 19 levels	0.00141056	2.32e-05	0.000191639	0.00140682	20.1261	40.9189	20.1797
rs28635588	A	G	A	G	-0.1775	-0.0223	0.8408	0.8594	Prostate cancer	6	32519041	0.0121	0.0658203	GCST90274765	6	32519041	0.0206	6.9e-18	C-C motif chemokine 19 levels	0.00802271	2.42e-05	3.29e-15	0.00843456	78.0879	40.9189	74.2442
rs34791102	A	G	A	G	0.1238	-0.0326	0.0534	0.054	Prostate cancer	9	35612978	0.0182	0.0726708	GCST90274765	9	35612978	0.0265	2.99e-06	C-C motif chemokine 19 levels	0.00147916	2.29e-05	0.0001	0.00154945	22.8636	40.9189	21.8248
rs374784992	A	G	A	G	0.1335	0.0283	0.9401	0.9432	Prostate cancer	4	119585039	0.0192	0.139	GCST90274765	4	119585039	0.0298	7.47e-06	C-C motif chemokine 19 levels	0.00170395	1.55e-05	9.95e-05	0.00200721	23.6483	40.9189	20.0692
rs3792790	A	C	A	C	0.0551	-0.0068	0.4736	0.4633	Prostate cancer	5	150442171	0.0081	0.401	GCST90274765	5	150442171	0.012	4.4e-06	C-C motif chemokine 19 levels	0.00147363	5.03e-06	3.82e-05	0.00151377	21.6585	40.9189	21.0834
rs4356912	T	C	T	C	-0.0592	-0.0003	0.6909	0.6997	Prostate cancer	4	7444846	0.0094	0.9713	GCST90274765	4	7444846	0.0133	8.54e-06	C-C motif chemokine 19 levels	0.00138493	7.26e-09	2.34e-05	0.00149688	21.4165	40.9189	19.8125
rs454265	A	G	A	G	-0.0561	-0.0039	0.6505	0.6499	Prostate cancer	8	81339142	0.0091	0.667599	GCST90274765	8	81339142	0.0124	6.06e-06	C-C motif chemokine 19 levels	0.00138802	1.31e-06	3.04e-05	0.00143103	21.1036	40.9189	20.4683
rs4554017	T	C	T	C	0.0596	-0.0251	0.3904	0.3994	Prostate cancer	4	145124024	0.0082	0.00230298	GCST90274765	4	145124024	0.0122	1.03e-06	C-C motif chemokine 19 levels	0.00166777	6.68e-05	0.000197738	0.00169074	24.1948	40.9189	23.8656
rs4907572	A	G	A	G	-0.0671	0.0022	0.2653	0.2684	Prostate cancer	13	113647321	0.0091	0.8128	GCST90274765	13	113647321	0.0137	9.69e-07	C-C motif chemokine 19 levels	0.001627	4.17e-07	4.57e-06	0.00175518	25.8817	40.9189	23.9885
rs62292952	T	G	T	G	0.2346	-0.0274	0.8822	0.8872	Prostate cancer	3	132200719	0.0127	0.0305197	GCST90274765	3	132200719	0.0185	7.53e-37	C-C motif chemokine 19 levels	0.0108022	3.32e-05	5.49e-30	0.0114393	170.404	40.9189	160.81
rs6486995	A	T	A	T	-0.0697	-0.0204	0.2452	0.2369	Prostate cancer	12	19813981	0.0097	0.0363999	GCST90274765	12	19813981	0.0135	2.43e-07	C-C motif chemokine 19 levels	0.00180602	3.15e-05	2.03e-05	0.00179824	26.5412	40.9189	26.6562
rs6535499	T	C	T	C	-0.1216	-0.0079	0.0583	0.0478	Prostate cancer	4	76428761	0.0208	0.7039	GCST90274765	4	76428761	0.0272	7.8e-06	C-C motif chemokine 19 levels	0.00139705	1.03e-06	3.44e-05	0.0016236	23.2324	40.9189	19.9862
rs6870560	T	C	T	C	0.0863	0.0127	0.8559	0.8573	Prostate cancer	5	174187919	0.0116	0.2734	GCST90274765	5	174187919	0.0169	3.28e-07	C-C motif chemokine 19 levels	0.00176717	8.55e-06	6.22e-06	0.00183712	27.1106	40.9189	26.0764
rs7185085	T	C	T	C	-0.3558	-0.0038	0.9931	0.9941	Prostate cancer	16	82146285	0.0559	0.9463	GCST90274765	16	82146285	0.0803	9.38e-06	C-C motif chemokine 19 levels	0.00159504	3.29e-08	2.36e-05	0.00173494	21.3577	40.9189	19.6327
rs73257451	T	C	T	C	-0.3645	-0.0045	0.989	0.9923	Prostate cancer	8	61418130	0.0471	0.924	GCST90274765	8	61418130	0.0756	1.43e-06	C-C motif chemokine 19 levels	0.00204663	6.51e-08	4.03e-06	0.00289077	32.8619	40.9189	23.2462
rs74764632	A	T	A	T	0.1349	-0.0024	0.9557	0.9534	Prostate cancer	16	57300587	0.0201	0.905	GCST90274765	16	57300587	0.0294	4.47e-06	C-C motif chemokine 19 levels	0.00142708	1.02e-07	1.51e-05	0.00154092	22.7358	40.9189	21.0537
rs7595241	C	G	C	G	0.0615	-0.0081	0.6941	0.6946	Prostate cancer	2	7425475	0.0095	0.3952	GCST90274765	2	7425475	0.013	2.24e-06	C-C motif chemokine 19 levels	0.00156413	5.18e-06	2.17e-05	0.00160613	22.9821	40.9189	22.3802
rs76295077	T	C	T	C	0.0928	0.0091	0.8962	0.8952	Prostate cancer	13	23257952	0.0153	0.5518	GCST90274765	13	23257952	0.0208	8.14e-06	C-C motif chemokine 19 levels	0.00139141	2.52e-06	4.73e-05	0.00160224	22.9264	40.9189	19.9053
rs79086127	T	C	T	C	-0.2096	-0.0094	0.0195	0.0186	Prostate cancer	4	123839263	0.0307	0.760001	GCST90274765	4	123839263	0.045	3.2e-06	C-C motif chemokine 19 levels	0.00152067	6.68e-07	1.4e-05	0.00167994	23.9711	40.9189	21.6949
rs9469127	C	G	C	G	-0.4884	0.0015	0.9365	0.9579	Prostate cancer	6	32444093	0.0203	0.9416	GCST90274765	6	32444093	0.0277	1.41e-69	C-C motif chemokine 19 levels	0.0206648	3.89e-08	1.52e-62	0.0283702	430.183	40.9189	310.879
rs10207134	T	C	T	C	-0.0996	-0.0193	0.326	0.3269	Prostate cancer	2	228661828	0.0092	0.0356	GCST90274766	2	228661828	0.0128	7.18e-15	C-C motif chemokine 20 levels	0.00422067	3.14e-05	1.29e-11	0.00435939	62.5466	40.9189	60.5479
rs1027232	A	C	A	C	0.1072	0.0186	0.0762	0.0643	Prostate cancer	15	40077948	0.0173	0.2846	GCST90274766	15	40077948	0.0238	6.66e-06	C-C motif chemokine 20 levels	0.00137561	8.24e-06	7.74e-05	0.0016179	23.8671	40.9189	20.2878
rs10837780	T	C	T	C	0.1191	0.0166	0.9413	0.9426	Prostate cancer	11	42142787	0.0179	0.3526	GCST90274766	11	42142787	0.026	4.63e-06	C-C motif chemokine 20 levels	0.00146666	6.13e-06	4.49e-05	0.00156754	22.4291	40.9189	20.9834
rs111674022	T	C	T	C	-0.0953	0.013	0.0967	0.0947	Prostate cancer	1	238606022	0.0149	0.3835	GCST90274766	1	238606022	0.0208	4.61e-06	C-C motif chemokine 20 levels	0.00146727	5.43e-06	4.16e-05	0.00158662	22.7025	40.9189	20.9923
rs11242693	T	C	T	C	0.0637	-0.0086	0.3674	0.3825	Prostate cancer	6	1448190	0.0087	0.3226	GCST90274766	6	1448190	0.0135	2.38e-06	C-C motif chemokine 20 levels	0.00179201	6.97e-06	2.24e-05	0.00188615	23.4363	40.9189	22.2644
rs1129474	T	C	T	C	0.0573	-0.0026	0.5396	0.5291	Prostate cancer	8	22584718	0.0091	0.7738	GCST90274766	8	22584718	0.012	1.8e-06	C-C motif chemokine 20 levels	0.00159347	5.82e-07	8.17e-06	0.00163135	23.3435	40.9189	22.8006
rs11582772	T	C	T	C	0.2585	-0.047	0.9859	0.9879	Prostate cancer	1	32260562	0.0397	0.236	GCST90274766	1	32260562	0.0548	2.39e-06	C-C motif chemokine 20 levels	0.00156006	9.99e-06	3.57e-05	0.00185782	26.5064	40.9189	22.2515
rs117753190	C	G	C	G	-0.185	0.0045	0.9688	0.9732	Prostate cancer	17	67136325	0.026	0.8627	GCST90274766	17	67136325	0.0359	2.56e-07	C-C motif chemokine 20 levels	0.00186125	2.14e-07	1.2e-06	0.00206901	29.5258	40.9189	26.5555
rs117900576	C	G	C	G	-0.2256	0.0191	0.9694	0.9775	Prostate cancer	17	72761195	0.0358	0.5932	GCST90274766	17	72761195	0.0429	1.45e-07	C-C motif chemokine 20 levels	0.00208718	2.03e-06	1.12e-06	0.00301948	40.0445	40.9189	27.6544
rs118164045	T	C	T	C	0.1297	0.0544	0.9526	0.952	Prostate cancer	14	92792639	0.0206	0.00826209	GCST90274766	14	92792639	0.0289	7.19e-06	C-C motif chemokine 20 levels	0.00140787	4.97e-05	0.000517754	0.00151914	21.7355	40.9189	20.1412
rs13049624	A	G	A	G	-0.1315	0.0246	0.9476	0.9467	Prostate cancer	21	44005002	0.019	0.1963	GCST90274766	21	44005002	0.0276	1.89e-06	C-C motif chemokine 20 levels	0.00158647	1.2e-05	3.41e-05	0.00171727	24.5751	40.9189	22.7004
rs13185268	T	C	T	C	0.1091	0.0064	0.9296	0.9386	Prostate cancer	5	133019542	0.0173	0.712	GCST90274766	5	133019542	0.0239	5e-06	C-C motif chemokine 20 levels	0.00141342	9.76e-07	2.36e-05	0.00155793	22.9717	40.9189	20.8379
rs151092565	T	C	T	C	-0.1512	0.0034	0.0376	0.034	Prostate cancer	14	94625543	0.0233	0.8849	GCST90274766	14	94625543	0.0328	4.03e-06	C-C motif chemokine 20 levels	0.00144094	1.52e-07	1.43e-05	0.00165454	24.4051	40.9189	21.2499
rs2003431	A	T	A	T	-0.1602	0.0259	0.0632	0.0821	Prostate cancer	14	106782532	0.029	0.3725	GCST90274766	14	106782532	0.0344	3.21e-06	C-C motif chemokine 20 levels	0.00221172	5.69e-06	1.93e-05	0.00303892	29.8234	40.9189	21.6874
rs2796032	T	C	T	C	0.0636	-0.0023	0.3159	0.3139	Prostate cancer	9	115519904	0.0086	0.7894	GCST90274766	9	115519904	0.0127	5.5e-07	C-C motif chemokine 20 levels	0.00170129	5.1e-07	2.87e-06	0.00174829	25.7729	40.9189	25.0788
rs34729167	T	C	T	C	0.0801	0.0158	0.136	0.1198	Prostate cancer	6	162943133	0.0126	0.2107	GCST90274766	6	162943133	0.0179	7.65e-06	C-C motif chemokine 20 levels	0.00139972	1.12e-05	0.000104187	0.00150781	21.5732	40.9189	20.0244
rs35833676	T	C	T	C	0.0804	-0.0062	0.1452	0.1468	Prostate cancer	21	32961256	0.0115	0.5861	GCST90274766	21	32961256	0.0166	1.28e-06	C-C motif chemokine 20 levels	0.00159002	2.07e-06	9e-06	0.00160462	23.6741	40.9189	23.4583
rs41302923	A	G	A	G	0.1939	-0.0107	0.9774	0.9781	Prostate cancer	10	127693479	0.0286	0.7085	GCST90274766	10	127693479	0.0414	2.82e-06	C-C motif chemokine 20 levels	0.00148759	9.98e-07	1.43e-05	0.00166099	24.4971	40.9189	21.9359
rs55891514	T	C	T	C	0.0955	0.008	0.9122	0.916	Prostate cancer	5	40408939	0.0145	0.5811	GCST90274766	5	40408939	0.0213	7.34e-06	C-C motif chemokine 20 levels	0.00136259	2.17e-06	4.24e-05	0.0014609	21.555	40.9189	20.1024
rs564398411	T	C	T	C	0.3494	0.0118	0.9856	0.9865	Prostate cancer	12	76655980	0.0466	0.8007	GCST90274766	12	76655980	0.0713	9.56e-07	C-C motif chemokine 20 levels	0.00230263	4.57e-07	3.17e-06	0.00346528	36.1817	40.9189	24.0141
rs5769672	T	G	T	G	-0.1184	-0.0099	0.9406	0.95	Prostate cancer	22	49877754	0.0204	0.6273	GCST90274766	22	49877754	0.0257	4.09e-06	C-C motif chemokine 20 levels	0.00143883	1.68e-06	2.32e-05	0.00156648	23.1105	40.9189	21.2245
rs73072893	A	G	A	G	0.2057	0.0132	0.9739	0.9714	Prostate cancer	12	19657540	0.0254	0.6048	GCST90274766	12	19657540	0.0422	1.09e-06	C-C motif chemokine 20 levels	0.00179296	1.93e-06	6.62e-06	0.00215107	28.5156	40.9189	23.7598
rs742493	T	C	T	C	0.1459	-0.0153	0.883	0.8893	Prostate cancer	6	40998167	0.0134	0.2559	GCST90274766	6	40998167	0.0185	3.11e-15	C-C motif chemokine 20 levels	0.00420384	9.3e-06	9.02e-13	0.00439832	65.0868	40.9189	62.1967
rs748503	T	C	T	C	-0.0722	0.0003	0.1993	0.187	Prostate cancer	10	73509465	0.0124	0.9794	GCST90274766	10	73509465	0.0162	8.32e-06	C-C motif chemokine 20 levels	0.00138845	4.17e-09	2.26e-05	0.00166373	23.8076	40.9189	19.863
rs7749768	T	G	T	G	-0.0622	-0.0015	0.754	0.7577	Prostate cancer	6	107477601	0.01	0.881	GCST90274766	6	107477601	0.0138	6.57e-06	C-C motif chemokine 20 levels	0.00137943	1.6e-07	2.23e-05	0.00143522	21.1381	40.9189	20.3153
rs9357723	A	G	A	G	0.0522	0.0053	0.4744	0.4714	Prostate cancer	6	51953097	0.0081	0.5092	GCST90274766	6	51953097	0.0116	6.8e-06	C-C motif chemokine 20 levels	0.00137258	3.05e-06	4.54e-05	0.00135885	20.0472	40.9189	20.25
rs1001495	T	C	T	C	0.0983	0.0165	0.9113	0.9133	Prostate cancer	2	241647342	0.0146	0.2594	GCST90274767	2	241647342	0.0215	4.83e-06	C-C motif chemokine 23 levels	0.00152931	9.11e-06	5.65e-05	0.00156215	21.3535	40.9189	20.904
rs11017721	A	G	A	G	0.0971	0.002	0.1154	0.1111	Prostate cancer	10	132905425	0.0138	0.8878	GCST90274767	10	132905425	0.0186	1.79e-07	C-C motif chemokine 23 levels	0.00190403	1.5e-07	8.33e-07	0.00192496	27.553	40.9189	27.2529
rs112492	A	G	A	G	-0.0692	-0.0133	0.7293	0.7393	Prostate cancer	11	1989274	0.0094	0.1561	GCST90274767	11	1989274	0.014	7.7e-07	C-C motif chemokine 23 levels	0.00184441	1.43e-05	1.65e-05	0.00189076	25.047	40.9189	24.4318
rs113959305	T	C	T	C	-0.1397	-0.0136	0.0559	0.0569	Prostate cancer	22	51076281	0.0199	0.4929	GCST90274767	22	51076281	0.0285	9.5e-07	C-C motif chemokine 23 levels	0.00181392	3.33e-06	7.34e-06	0.00205993	27.2926	40.9189	24.0272
rs116683909	A	G	A	G	-0.21	-0.0574	0.0278	0.0215	Prostate cancer	3	14445911	0.0341	0.0918396	GCST90274767	3	14445911	0.0426	8.24e-07	C-C motif chemokine 23 levels	0.00164792	2.02e-05	3.05e-05	0.0023838	35.1781	40.9189	24.3007
rs117639761	A	C	A	C	-0.3246	-0.0299	0.9561	0.9835	Prostate cancer	17	34195180	0.036	0.4064	GCST90274767	17	34195180	0.0413	3.85e-15	C-C motif chemokine 23 levels	0.00417503	4.92e-06	5.39e-13	0.00884494	131.484	40.9189	61.7727
rs12103669	A	G	A	G	-0.1778	-0.0333	0.0234	0.0219	Prostate cancer	17	47298101	0.0302	0.2712	GCST90274767	17	47298101	0.0402	9.74e-06	C-C motif chemokine 23 levels	0.00132609	8.67e-06	0.000110444	0.00144486	21.3165	40.9189	19.5619
rs12204524	C	G	C	G	0.1164	0.0083	0.9291	0.9253	Prostate cancer	6	86144743	0.0156	0.595	GCST90274767	6	86144743	0.0237	9.04e-07	C-C motif chemokine 23 levels	0.00163547	2.02e-06	6.58e-06	0.00178503	26.3315	40.9189	24.1218
rs143910182	T	C	T	C	0.2157	-0.0104	0.0255	0.0177	Prostate cancer	3	6127208	0.0343	0.7619	GCST90274767	3	6127208	0.0449	1.56e-06	C-C motif chemokine 23 levels	0.00156453	6.55e-07	7.63e-06	0.00231234	34.1351	40.9189	23.0785
rs146074782	A	G	A	G	-0.3061	-0.0129	0.0116	0.0112	Prostate cancer	1	203441260	0.0435	0.7665	GCST90274767	1	203441260	0.0626	1.01e-06	C-C motif chemokine 23 levels	0.00184534	6.27e-07	4.41e-06	0.00214856	27.8472	40.9189	23.9099
rs16971993	T	C	T	C	-0.1285	-0.031	0.0956	0.0954	Prostate cancer	17	34445397	0.0189	0.1007	GCST90274767	17	34445397	0.025	2.75e-07	C-C motif chemokine 23 levels	0.00184592	1.92e-05	1.1e-05	0.00285532	40.9079	40.9189	26.4196
rs17092563	C	G	C	G	-0.202	0.0023	0.9774	0.9877	Prostate cancer	10	116653091	0.0387	0.9528	GCST90274767	10	116653091	0.0445	5.64e-06	C-C motif chemokine 23 levels	0.00139683	2.52e-08	1.72e-05	0.00180266	26.6029	40.9189	20.6055
rs17735284	A	T	A	T	0.0927	0.0118	0.0922	0.0893	Prostate cancer	11	84372512	0.014	0.3988	GCST90274767	11	84372512	0.0202	4.45e-06	C-C motif chemokine 23 levels	0.00142837	5.07e-06	4.05e-05	0.0014385	21.2096	40.9189	21.0599
rs1926742	A	G	A	G	0.0574	-0.0029	0.3093	0.3001	Prostate cancer	10	18295482	0.0089	0.7467	GCST90274767	10	18295482	0.0125	4.39e-06	C-C motif chemokine 23 levels	0.00143016	7.57e-07	1.98e-05	0.00140774	20.7554	40.9189	21.0865
rs2263318	A	G	A	G	-0.1027	-0.0312	0.0765	0.0722	Prostate cancer	6	31432006	0.0156	0.0446704	GCST90274767	6	31432006	0.0232	9.57e-06	C-C motif chemokine 23 levels	0.0013283	2.85e-05	0.000326408	0.00149029	21.9891	40.9189	19.5959
rs2870238	T	C	T	C	0.0574	0.0076	0.4869	0.4905	Prostate cancer	4	77373079	0.0082	0.3558	GCST90274767	4	77373079	0.0114	4.78e-07	C-C motif chemokine 23 levels	0.0017177	6.12e-06	6.72e-06	0.00164625	24.2958	40.9189	25.3521
rs2905095	T	C	T	C	0.0664	0.0068	0.3078	0.3087	Prostate cancer	9	135902793	0.0094	0.465799	GCST90274767	9	135902793	0.0148	7.24e-06	C-C motif chemokine 23 levels	0.00177264	3.73e-06	3.85e-05	0.00187874	21.3356	40.9189	20.1286
rs376974828	T	C	T	C	-0.1724	0.0327	0.0385	0.0342	Prostate cancer	19	11626019	0.0284	0.2503	GCST90274767	19	11626019	0.039	9.85e-06	C-C motif chemokine 23 levels	0.00182395	9.45e-06	7.71e-05	0.00220046	23.5837	40.9189	19.5409
rs4317138	T	C	T	C	0.0585	-0.0071	0.6736	0.6648	Prostate cancer	3	46462144	0.009	0.425	GCST90274767	3	46462144	0.0127	4.1e-06	C-C motif chemokine 23 levels	0.00148303	4.44e-06	3.37e-05	0.00150485	21.5307	40.9189	21.218
rs438811	T	C	T	C	0.0669	-0.0224	0.2405	0.2312	Prostate cancer	19	45416741	0.0098	0.0224502	GCST90274767	19	45416741	0.0138	1.25e-06	C-C motif chemokine 23 levels	0.00159424	3.72e-05	9.38e-05	0.00163503	24.1037	40.9189	23.5014
rs4719850	T	C	T	C	-0.0548	-0.0071	0.5907	0.5863	Prostate cancer	7	3238978	0.0084	0.3978	GCST90274767	7	3238978	0.0118	3.42e-06	C-C motif chemokine 23 levels	0.00146263	5.09e-06	3.24e-05	0.00145211	21.412	40.9189	21.5674
rs536720979	A	G	A	G	0.2618	-0.0257	0.0138	0.0135	Prostate cancer	13	46239903	0.0377	0.4966	GCST90274767	13	46239903	0.0591	9.43e-06	C-C motif chemokine 23 levels	0.00166612	3.31e-06	4.82e-05	0.00186558	21.9765	40.9189	19.623
rs55755820	T	G	T	G	-0.1035	0.022	0.899	0.8949	Prostate cancer	1	245606006	0.0151	0.145	GCST90274767	1	245606006	0.0228	5.64e-06	C-C motif chemokine 23 levels	0.00178312	1.51e-05	7.48e-05	0.00194532	22.485	40.9189	20.6068
rs6497967	T	C	T	C	-0.0547	0.0041	0.3198	0.3365	Prostate cancer	16	26890471	0.009	0.6498	GCST90274767	16	26890471	0.0123	8.7e-06	C-C motif chemokine 23 levels	0.00134112	1.48e-06	4.33e-05	0.00130173	19.1955	40.9189	19.7772
rs712048	A	C	A	C	-0.5147	-0.0133	0.1497	0.1365	Prostate cancer	17	34326215	0.0129	0.3052	GCST90274767	17	34326215	0.0158	8.99e-233	C-C motif chemokine 23 levels	0.0672399	7.58e-06	8.29e-202	0.0674423	1064.62	40.9189	1061.19
rs73071153	A	G	A	G	-0.1497	-0.0158	0.0393	0.036	Prostate cancer	7	17545964	0.0241	0.5133	GCST90274767	7	17545964	0.0319	2.7e-06	C-C motif chemokine 23 levels	0.00149324	3.06e-06	2.04e-05	0.00169221	24.9617	40.9189	22.0223
rs73114426	A	G	A	G	0.0948	-0.0281	0.0846	0.0886	Prostate cancer	12	57405049	0.0141	0.0466595	GCST90274767	12	57405049	0.0207	4.66e-06	C-C motif chemokine 23 levels	0.00142195	2.83e-05	0.000183192	0.00139196	20.5308	40.9189	20.9737
rs74127049	C	G	C	G	0.0603	0.0038	0.608	0.6235	Prostate cancer	1	161582200	0.0095	0.6868	GCST90274767	1	161582200	0.0132	4.92e-06	C-C motif chemokine 23 levels	0.0015526	1.14e-06	2.19e-05	0.00173322	23.3002	40.9189	20.8683
rs74491711	A	G	A	G	0.1273	-0.0043	0.048	0.0448	Prostate cancer	3	40054358	0.0197	0.8262	GCST90274767	3	40054358	0.0278	4.67e-06	C-C motif chemokine 23 levels	0.00142121	3.4e-07	1.81e-05	0.00148103	21.8524	40.9189	20.9685
rs77083410	C	G	C	G	0.224	0.007	0.0223	0.02	Prostate cancer	11	115081786	0.0321	0.8279	GCST90274767	11	115081786	0.0416	7.26e-08	C-C motif chemokine 23 levels	0.00196424	3.39e-07	4.34e-07	0.00218795	32.3035	40.9189	28.9941
rs77354000	A	G	A	G	-0.2064	-0.0342	0.9788	0.9807	Prostate cancer	10	34433796	0.034	0.3148	GCST90274767	10	34433796	0.0437	2.32e-06	C-C motif chemokine 23 levels	0.00151185	7.21e-06	2.89e-05	0.00176799	26.0939	40.9189	22.3078
rs77527696	T	C	T	C	-0.2538	-0.038	0.0298	0.0423	Prostate cancer	17	34816052	0.0309	0.2175	GCST90274767	17	34816052	0.0465	4.81e-08	C-C motif chemokine 23 levels	0.00214988	1.08e-05	1.32e-06	0.0037247	51.6939	40.9189	29.7905
rs79960240	T	G	T	G	-0.2384	0.0083	0.0143	0.0124	Prostate cancer	14	94811056	0.0394	0.8323	GCST90274767	14	94811056	0.0537	9.02e-06	C-C motif chemokine 23 levels	0.00138147	3.16e-07	3.12e-05	0.00160222	22.8635	40.9189	19.709
rs80014265	T	C	T	C	0.1307	0.0072	0.0514	0.0372	Prostate cancer	9	94180109	0.0246	0.7689	GCST90274767	9	94180109	0.0289	6.11e-06	C-C motif chemokine 23 levels	0.00138622	6.11e-07	2.54e-05	0.00166582	24.5851	40.9189	20.4529
rs10792444	T	C	T	C	-0.0865	0.0218	0.8838	0.8982	Prostate cancer	11	64434151	0.0133	0.1013	GCST90274768	11	64434151	0.0181	1.76e-06	C-C motif chemokine 25 levels	0.0015481	1.92e-05	5.35e-05	0.00153682	22.6722	40.9189	22.8389
rs111437511	T	C	T	C	0.1437	-0.0065	0.0428	0.0438	Prostate cancer	8	10694001	0.0195	0.7395	GCST90274768	8	10694001	0.0297	1.31e-06	C-C motif chemokine 25 levels	0.00158664	7.92e-07	6.84e-06	0.00169196	24.9665	40.9189	23.41
rs113348389	T	C	T	C	-0.7068	-0.024	0.9728	0.9738	Prostate cancer	19	8158245	0.0273	0.3796	GCST90274768	19	8158245	0.0379	1.28e-77	C-C motif chemokine 25 levels	0.0230831	5.51e-06	8.14e-68	0.0264372	399.696	40.9189	347.788
rs116534774	T	C	T	C	0.3717	-0.0386	0.9916	0.9926	Prostate cancer	9	125200862	0.0512	0.4512	GCST90274768	9	125200862	0.0777	1.72e-06	C-C motif chemokine 25 levels	0.00205061	4.05e-06	1.09e-05	0.00230161	25.6921	40.9189	22.8846
rs143132666	A	C	A	C	-0.1934	0.0217	0.0225	0.0213	Prostate cancer	1	160762078	0.0287	0.450001	GCST90274768	1	160762078	0.0406	1.9e-06	C-C motif chemokine 25 levels	0.00153791	4.08e-06	1.73e-05	0.00164529	24.2783	40.9189	22.6914
rs17683663	T	C	T	C	-0.1198	-0.0171	0.0745	0.0712	Prostate cancer	8	42081422	0.016	0.2869	GCST90274768	8	42081422	0.0226	1.15e-07	C-C motif chemokine 25 levels	0.00190426	8.14e-06	2.46e-06	0.00197914	29.2066	40.9189	28.0994
rs184092631	A	C	A	C	0.2448	-0.0386	0.9809	0.9831	Prostate cancer	19	8276989	0.0362	0.2861	GCST90274768	19	8276989	0.0466	1.49e-07	C-C motif chemokine 25 levels	0.00186947	8.11e-06	3.06e-06	0.00224549	33.1595	40.9189	27.5963
rs2078037	A	C	A	C	0.0662	0.0133	0.7599	0.751	Prostate cancer	18	2519969	0.0093	0.1553	GCST90274768	18	2519969	0.0136	1.13e-06	C-C motif chemokine 25 levels	0.00160815	1.46e-05	2.8e-05	0.00159917	23.5615	40.9189	23.694
rs2287936	A	G	A	G	0.7276	0.0385	0.1067	0.0884	Prostate cancer	19	8127331	0.015	0.0105599	GCST90274768	19	8127331	0.0191	1e-300	C-C motif chemokine 25 levels	0.092213	4.7e-05	3.52e-267	0.10092	1603.58	40.9189	1451.17
rs485073	A	G	A	G	0.3098	-0.0094	0.5286	0.514	Prostate cancer	19	49207255	0.0081	0.249	GCST90274768	19	49207255	0.0113	1.77e-165	C-C motif chemokine 25 levels	0.0485406	9.6e-06	1.74e-143	0.047831	740.094	40.9189	751.633
rs635634	T	C	T	C	-0.2482	0.0057	0.1875	0.2011	Prostate cancer	9	136155000	0.0102	0.5797	GCST90274768	9	136155000	0.0166	1.52e-50	C-C motif chemokine 25 levels	0.0186195	2.23e-06	1.63e-45	0.0187697	225.394	40.9189	223.557
rs7137942	A	G	A	G	-0.0637	0.0048	0.6502	0.645	Prostate cancer	12	81177765	0.0088	0.5905	GCST90274768	12	81177765	0.0133	1.67e-06	C-C motif chemokine 25 levels	0.00184621	2.12e-06	9.26e-06	0.00184576	22.9335	40.9189	22.9391
rs7296588	A	G	A	G	-0.1159	-0.0034	0.4365	0.4334	Prostate cancer	12	578100	0.0081	0.6725	GCST90274768	12	578100	0.0116	1.66e-23	C-C motif chemokine 25 levels	0.00673472	1.26e-06	7.64e-21	0.00660808	97.9379	40.9189	99.8277
rs72995492	A	T	A	T	0.2394	0.0045	0.0243	0.0191	Prostate cancer	19	8260355	0.037	0.904	GCST90274768	19	8260355	0.042	1.2e-08	C-C motif chemokine 25 levels	0.00220324	1.05e-07	7.33e-08	0.0027177	40.0971	40.9189	32.49
rs851850	A	G	A	G	-0.0777	0.0171	0.846	0.8527	Prostate cancer	6	67085077	0.0122	0.1611	GCST90274768	6	67085077	0.0163	1.87e-06	C-C motif chemokine 25 levels	0.00158806	1.4e-05	3.89e-05	0.00157313	22.5091	40.9189	22.7231
rs112641086	T	C	T	C	-0.1056	0.0015	0.0895	0.0929	Prostate cancer	2	207076122	0.0146	0.918	GCST90274769	2	207076122	0.0198	9.64e-08	C-C motif chemokine 28 levels	0.00192746	7.53e-08	4.65e-07	0.00181744	26.8179	40.9189	28.4444
rs113582651	T	G	T	G	0.242	0.141	0.0489	0.0109	Prostate cancer	19	55238516	0.0512	0.00585706	GCST90274769	19	55238516	0.0523	3.71e-06	C-C motif chemokine 28 levels	0.00239748	5.41e-05	0.000137949	0.00544748	48.7974	40.9189	21.4105
rs116782490	A	C	A	C	0.2298	-0.0032	0.9815	0.9842	Prostate cancer	5	84924989	0.0355	0.9289	GCST90274769	5	84924989	0.0488	2.49e-06	C-C motif chemokine 28 levels	0.00175251	5.79e-08	7.36e-06	0.00191775	24.2696	40.9189	22.1748
rs11754249	A	G	A	G	0.0934	0.0095	0.1058	0.1136	Prostate cancer	6	145107700	0.0128	0.4563	GCST90274769	6	145107700	0.0205	5.21e-06	C-C motif chemokine 28 levels	0.00175949	3.93e-06	3.07e-05	0.00165061	19.4714	40.9189	20.758
rs118111688	A	T	A	T	0.1874	-0.0333	0.9776	0.9812	Prostate cancer	7	12554637	0.0305	0.2753	GCST90274769	7	12554637	0.0424	9.88e-06	C-C motif chemokine 28 levels	0.00145874	8.5e-06	9.63e-05	0.00153808	20.5989	40.9189	19.5347
rs12589600	A	G	A	G	0.051	0.0063	0.5556	0.5443	Prostate cancer	14	86936828	0.0084	0.4562	GCST90274769	14	86936828	0.0114	7.69e-06	C-C motif chemokine 28 levels	0.00135881	4.01e-06	5.72e-05	0.00128442	18.9168	40.9189	20.0139
rs139902	A	C	A	C	0.0684	-0.002	0.3659	0.3683	Prostate cancer	22	38406782	0.0084	0.8099	GCST90274769	22	38406782	0.0121	1.58e-08	C-C motif chemokine 28 levels	0.00223229	4.04e-07	1.09e-07	0.00217101	31.076	40.9189	31.9552
rs140404587	T	G	T	G	-0.2617	-0.0251	0.0119	0.012	Prostate cancer	12	106453419	0.0399	0.5296	GCST90274769	12	106453419	0.0587	8.26e-06	C-C motif chemokine 28 levels	0.00139395	2.82e-06	5e-05	0.00161059	22.9702	40.9189	19.8761
rs141430371	A	G	A	G	-0.4948	0.0054	0.9936	0.9957	Prostate cancer	6	29556379	0.0682	0.9369	GCST90274769	6	29556379	0.112	9.97e-06	C-C motif chemokine 28 levels	0.00280483	4.47e-08	1.76e-05	0.00311373	21.6737	40.9189	19.5175
rs143400203	T	C	T	C	0.1812	-0.0355	0.0244	0.0192	Prostate cancer	7	115560778	0.0308	0.2494	GCST90274769	7	115560778	0.0392	3.79e-06	C-C motif chemokine 28 levels	0.00144946	9.47e-06	5.32e-05	0.00156318	23.046	40.9189	21.367
rs150193318	A	G	A	G	0.2249	-0.0021	0.0212	0.0139	Prostate cancer	19	31385455	0.04	0.9579	GCST90274769	19	31385455	0.0501	7.16e-06	C-C motif chemokine 28 levels	0.00140877	1.97e-08	2.05e-05	0.00209913	30.047	40.9189	20.1513
rs1514964	T	C	T	C	-0.1263	0.0292	0.9486	0.9526	Prostate cancer	1	64836646	0.0202	0.1495	GCST90274769	1	64836646	0.0264	1.72e-06	C-C motif chemokine 28 levels	0.00155118	1.49e-05	4.06e-05	0.00155555	22.952	40.9189	22.8875
rs17098842	A	G	A	G	0.1458	-0.0065	0.9674	0.9689	Prostate cancer	1	76835048	0.023	0.777	GCST90274769	1	76835048	0.0321	5.57e-06	C-C motif chemokine 28 levels	0.0013986	5.69e-07	2.31e-05	0.00134081	19.7767	40.9189	20.6303
rs2631360	A	G	A	G	0.0597	-0.0079	0.5481	0.541	Prostate cancer	5	131707429	0.008	0.3247	GCST90274769	5	131707429	0.0128	3.1e-06	C-C motif chemokine 28 levels	0.00184355	6.95e-06	2.63e-05	0.00176555	20.8315	40.9189	21.7535
rs28384995	A	T	A	T	-0.0866	-0.0131	0.8668	0.8653	Prostate cancer	15	91295829	0.0138	0.3439	GCST90274769	15	91295829	0.0194	8.05e-06	C-C motif chemokine 28 levels	0.00139308	6.42e-06	7.4e-05	0.00173176	24.7794	40.9189	19.9266
rs371663005	A	G	A	G	-0.0959	0.0082	0.8571	0.866	Prostate cancer	11	25452442	0.0146	0.5749	GCST90274769	11	25452442	0.0208	4.02e-06	C-C motif chemokine 28 levels	0.00194785	2.25e-06	1.8e-05	0.00225284	24.5934	40.9189	21.2574
rs374794081	A	C	A	C	0.1182	-0.026	0.9197	0.9202	Prostate cancer	4	138284908	0.0179	0.1454	GCST90274769	4	138284908	0.0263	6.98e-06	C-C motif chemokine 28 levels	0.00177849	1.5e-05	8.7e-05	0.00206361	23.4435	40.9189	20.1987
rs3823797	A	G	A	G	-0.058	0.008	0.7423	0.7426	Prostate cancer	7	77694740	0.0092	0.3846	GCST90274769	7	77694740	0.0128	5.86e-06	C-C motif chemokine 28 levels	0.00139196	5.39e-06	5.31e-05	0.001287	18.982	40.9189	20.5322
rs4346241	A	G	A	G	0.0907	0.0159	0.9021	0.9058	Prostate cancer	17	8580609	0.0155	0.3046	GCST90274769	17	8580609	0.0204	8.75e-06	C-C motif chemokine 28 levels	0.00138199	7.5e-06	8.76e-05	0.00145305	20.7856	40.9189	19.7676
rs4866742	T	C	T	C	0.0702	-0.0199	0.4126	0.4021	Prostate cancer	5	43405459	0.0086	0.0204301	GCST90274769	5	43405459	0.0122	8.71e-09	C-C motif chemokine 28 levels	0.0025746	3.82e-05	1.33e-06	0.00238873	30.7136	40.9189	33.1096
rs546951873	A	G	A	G	0.3427	-0.0224	0.0122	0.0123	Prostate cancer	12	55558442	0.0433	0.6045	GCST90274769	12	55558442	0.0672	3.4e-07	C-C motif chemokine 28 levels	0.00230211	1.91e-06	1.91e-06	0.00283066	31.9949	40.9189	26.007
rs6580980	A	G	A	G	-0.0688	-0.0024	0.4015	0.41	Prostate cancer	12	54692061	0.0085	0.776401	GCST90274769	12	54692061	0.0118	5.53e-09	C-C motif chemokine 28 levels	0.00237444	5.68e-07	4.59e-08	0.00227487	32.5661	40.9189	33.9948
rs73000929	A	G	A	G	-0.1935	0.1019	0.0347	0.0226	Prostate cancer	11	113953622	0.0303	0.000783809	GCST90274769	11	113953622	0.0355	5.02e-08	C-C motif chemokine 28 levels	0.00201265	8.06e-05	3.38e-05	0.00250832	37.0456	40.9189	29.7102
rs74855027	T	C	T	C	0.1215	0.0104	0.0639	0.0542	Prostate cancer	2	225265371	0.0213	0.623499	GCST90274769	2	225265371	0.0271	7.35e-06	C-C motif chemokine 28 levels	0.00140525	1.7e-06	3.76e-05	0.00176606	25.271	40.9189	20.1008
rs76291845	A	G	A	G	0.2696	0.039	0.9859	0.9866	Prostate cancer	2	111889358	0.0389	0.3158	GCST90274769	2	111889358	0.0542	6.55e-07	C-C motif chemokine 28 levels	0.00173427	7.17e-06	9.27e-06	0.00202079	28.8384	40.9189	24.7424
rs7661151	T	C	T	C	0.0531	0.0078	0.6323	0.6277	Prostate cancer	4	157065076	0.0083	0.3514	GCST90274769	4	157065076	0.0116	4.7e-06	C-C motif chemokine 28 levels	0.00142073	6.3e-06	4.83e-05	0.0013111	19.3352	40.9189	20.9543
rs76669782	A	C	A	C	-0.2853	-0.0263	0.0176	0.0139	Prostate cancer	9	90419900	0.0396	0.5068	GCST90274769	9	90419900	0.0513	2.68e-08	C-C motif chemokine 28 levels	0.00238616	3.14e-06	2.96e-07	0.00281472	36.4998	40.9189	30.9292
rs76679915	T	C	T	C	0.0624	0.0126	0.7035	0.6868	Prostate cancer	4	125828318	0.0087	0.1453	GCST90274769	4	125828318	0.0137	5.24e-06	C-C motif chemokine 28 levels	0.00173159	1.5e-05	7.35e-05	0.00162438	19.4592	40.9189	20.7457
rs77569365	T	G	T	G	0.129	0.0136	0.9561	0.9564	Prostate cancer	13	106647340	0.02	0.494	GCST90274769	13	106647340	0.0282	4.77e-06	C-C motif chemokine 28 levels	0.00141841	3.3e-06	3.46e-05	0.00139694	20.6085	40.9189	20.9258
rs78552613	T	C	T	C	-0.1844	0.0077	0.0271	0.0208	Prostate cancer	10	105492625	0.033	0.8147	GCST90274769	10	105492625	0.0395	3.04e-06	C-C motif chemokine 28 levels	0.00147715	3.88e-07	1.26e-05	0.00179304	26.4625	40.9189	21.7935
rs78843608	A	G	A	G	-0.1684	0.0052	0.0376	0.0397	Prostate cancer	5	102824347	0.0217	0.8094	GCST90274769	5	102824347	0.0323	1.85e-07	C-C motif chemokine 28 levels	0.00184282	4.09e-07	1.04e-06	0.00205238	30.2793	40.9189	27.1819
rs79205279	A	G	A	G	0.1063	-0.0007	0.0645	0.0668	Prostate cancer	3	124901642	0.0172	0.9673	GCST90274769	3	124901642	0.024	9.46e-06	C-C motif chemokine 28 levels	0.00141422	1.18e-08	2.53e-05	0.00136364	18.9149	40.9189	19.6175
rs7958187	A	G	A	G	-0.055	0.0025	0.3872	0.3815	Prostate cancer	12	69466941	0.0089	0.779701	GCST90274769	12	69466941	0.0122	6.54e-06	C-C motif chemokine 28 levels	0.00151238	5.63e-07	2.41e-05	0.00143552	19.2895	40.9189	20.3238
rs79683119	A	C	A	C	0.159	0.0069	0.0266	0.0271	Prostate cancer	2	56679291	0.0275	0.803	GCST90274769	2	56679291	0.0358	8.94e-06	C-C motif chemokine 28 levels	0.00133717	4.49e-07	3.38e-05	0.00130917	19.312	40.9189	19.7255
rs801520	A	C	A	C	0.0779	-0.0022	0.1364	0.1075	Prostate cancer	7	18702222	0.013	0.8637	GCST90274769	7	18702222	0.0171	5.22e-06	C-C motif chemokine 28 levels	0.00140692	2.04e-07	1.87e-05	0.00142966	21.089	40.9189	20.7531
rs10990301	A	T	A	T	0.085	-0.0056	0.8839	0.8894	Prostate cancer	9	105528047	0.0129	0.6675	GCST90274770	9	105528047	0.0186	4.88e-06	C-C motif chemokine 4 levels	0.00145889	1.34e-06	2.44e-05	0.00148287	21.2276	40.9189	20.8839
rs111476793	A	G	A	G	0.0869	0.0044	0.1344	0.1239	Prostate cancer	4	53951496	0.0131	0.737901	GCST90274770	4	53951496	0.019	4.79e-06	C-C motif chemokine 4 levels	0.00163185	8.04e-07	1.87e-05	0.00175706	22.5264	40.9189	20.9186
rs112315344	T	G	T	G	0.2123	-0.0033	0.0284	0.0161	Prostate cancer	5	33775793	0.0417	0.9365	GCST90274770	5	33775793	0.0455	3.07e-06	C-C motif chemokine 4 levels	0.00152513	4.47e-08	9.86e-06	0.00248734	35.5405	40.9189	21.7709
rs112356872	T	C	T	C	-0.2165	-0.0018	0.9805	0.9835	Prostate cancer	7	22212109	0.0344	0.9589	GCST90274770	7	22212109	0.0478	5.92e-06	C-C motif chemokine 4 levels	0.00138973	1.95e-08	1.78e-05	0.00179237	26.4688	40.9189	20.5145
rs112846979	T	C	T	C	-0.188	-0.0434	0.0228	0.0203	Prostate cancer	3	190832842	0.0314	0.1661	GCST90274770	3	190832842	0.0414	5.6e-06	C-C motif chemokine 4 levels	0.00144057	1.36e-05	9.44e-05	0.00157494	22.5477	40.9189	20.6213
rs113010081	T	C	T	C	-0.5767	0.0049	0.8759	0.8922	Prostate cancer	3	46457412	0.0137	0.720701	GCST90274770	3	46457412	0.0184	1.24e-215	C-C motif chemokine 4 levels	0.064305	9.12e-07	3.4e-190	0.072303	1114.05	40.9189	982.345
rs1161092	A	G	A	G	-0.0635	-0.015	0.6742	0.68	Prostate cancer	12	67722012	0.0085	0.0797407	GCST90274770	12	67722012	0.0125	3.77e-07	C-C motif chemokine 4 levels	0.00180215	2.22e-05	1.7e-05	0.0017714	25.3654	40.9189	25.8064
rs116193969	A	T	A	T	0.2915	-0.0436	0.0134	0.0142	Prostate cancer	2	236974412	0.0451	0.3343	GCST90274770	2	236974412	0.0617	2.31e-06	C-C motif chemokine 4 levels	0.00155911	6.66e-06	2.61e-05	0.00224674	32.1872	40.9189	22.3206
rs116309267	C	G	C	G	0.1956	-0.0164	0.0299	0.0224	Prostate cancer	3	756117	0.0333	0.6237	GCST90274770	3	756117	0.0405	1.37e-06	C-C motif chemokine 4 levels	0.00158199	1.73e-06	8.94e-06	0.0022195	32.746	40.9189	23.3253
rs13100427	A	G	A	G	0.0533	0.011	0.56	0.5524	Prostate cancer	3	22458640	0.008	0.1697	GCST90274770	3	22458640	0.012	8.93e-06	C-C motif chemokine 4 levels	0.00137828	1.35e-05	0.000137838	0.00139999	20.0395	40.9189	19.7284
rs137896358	T	C	T	C	0.2797	0.0197	0.0186	0.017	Prostate cancer	19	18917908	0.0366	0.589899	GCST90274770	19	18917908	0.0551	3.85e-07	C-C motif chemokine 4 levels	0.00201805	2.07e-06	2.56e-06	0.0028561	36.4996	40.9189	25.7681
rs140505982	T	C	T	C	-0.2294	0.0072	0.0248	0.0214	Prostate cancer	3	46459749	0.0298	0.8099	GCST90274770	3	46459749	0.0415	3.24e-08	C-C motif chemokine 4 levels	0.00219926	4.16e-07	2.01e-07	0.00254544	35.3774	40.9189	30.5556
rs143922263	A	G	A	G	0.2198	-0.0315	0.0203	0.0162	Prostate cancer	2	162240222	0.0351	0.3693	GCST90274770	2	162240222	0.0497	9.75e-06	C-C motif chemokine 4 levels	0.00136645	5.74e-06	8.18e-05	0.00192165	27.521	40.9189	19.5588
rs143960014	A	G	A	G	0.1953	-0.0503	0.0228	0.0227	Prostate cancer	12	52285090	0.029	0.0824195	GCST90274770	12	52285090	0.0416	2.67e-06	C-C motif chemokine 4 levels	0.00154376	2.14e-05	7.99e-05	0.00169962	24.2694	40.9189	22.0403
rs148518028	T	C	T	C	0.1989	0.0838	0.0317	0.0199	Prostate cancer	2	79469060	0.0344	0.0147901	GCST90274770	2	79469060	0.044	6.17e-06	C-C motif chemokine 4 levels	0.00142755	4.23e-05	0.000364767	0.00242867	34.7999	40.9189	20.4345
rs1634503	A	G	A	G	-0.0745	0.0204	0.2416	0.2336	Prostate cancer	17	34421139	0.0094	0.0290102	GCST90274770	17	34421139	0.0138	6.72e-08	C-C motif chemokine 4 levels	0.00203491	3.36e-05	7.43e-06	0.00203394	29.1303	40.9189	29.1443
rs17692864	T	C	T	C	0.2321	-0.0186	0.9406	0.9606	Prostate cancer	17	34945214	0.0265	0.4815	GCST90274770	17	34945214	0.0283	2.38e-16	C-C motif chemokine 4 levels	0.00489997	3.51e-06	2.67e-14	0.00601966	82.7265	40.9189	67.2632
rs17792183	T	C	T	C	0.0763	-0.0115	0.8565	0.8622	Prostate cancer	6	22899548	0.0119	0.3358	GCST90274770	6	22899548	0.017	7.18e-06	C-C motif chemokine 4 levels	0.0014073	6.66e-06	6.87e-05	0.00143106	20.4849	40.9189	20.1443
rs183450854	C	G	C	G	0.2133	0.065	0.9802	0.9841	Prostate cancer	20	50372747	0.035	0.0631801	GCST90274770	20	50372747	0.0475	7.1e-06	C-C motif chemokine 4 levels	0.00136663	2.46e-05	0.000217289	0.001766	26.0681	40.9189	20.1648
rs3860989	A	C	A	C	-0.0631	0.0193	0.6988	0.6881	Prostate cancer	9	33460141	0.0091	0.0339899	GCST90274770	9	33460141	0.0142	8.84e-06	C-C motif chemokine 4 levels	0.00164527	3.21e-05	0.000243613	0.00167609	20.1166	40.9189	19.7461
rs42279	T	C	T	C	0.0743	0.0054	0.1598	0.1566	Prostate cancer	5	11317698	0.0117	0.645	GCST90274770	5	11317698	0.0162	4.51e-06	C-C motif chemokine 4 levels	0.00142544	1.52e-06	2.45e-05	0.00148241	21.8772	40.9189	21.0352
rs56131468	A	G	A	G	0.0833	0.0016	0.1323	0.136	Prostate cancer	10	132716137	0.0118	0.8945	GCST90274770	10	132716137	0.0178	2.87e-06	C-C motif chemokine 4 levels	0.00152979	1.31e-07	1.01e-05	0.00159312	22.8084	40.9189	21.9003
rs5743614	T	C	T	C	0.0728	-0.0097	0.2565	0.2382	Prostate cancer	4	38798935	0.0096	0.3125	GCST90274770	4	38798935	0.0143	3.56e-07	C-C motif chemokine 4 levels	0.00201176	7.28e-06	4.7e-06	0.00202144	26.0423	40.9189	25.9174
rs66822987	T	C	T	C	0.0648	-0.003	0.2289	0.2254	Prostate cancer	3	63106417	0.0101	0.7659	GCST90274770	3	63106417	0.0146	9.06e-06	C-C motif chemokine 4 levels	0.00137623	6.29e-07	3.52e-05	0.0014823	21.2195	40.9189	19.699
rs72800563	T	G	T	G	-0.1765	0.0139	0.9693	0.9743	Prostate cancer	16	79338459	0.026	0.593	GCST90274770	16	79338459	0.0374	2.37e-06	C-C motif chemokine 4 levels	0.00150877	2.04e-06	1.54e-05	0.00185403	27.3773	40.9189	22.2713
rs78044056	A	G	A	G	-0.2607	-0.0097	0.0138	0.0124	Prostate cancer	4	157055604	0.0409	0.8127	GCST90274770	4	157055604	0.0552	2.33e-06	C-C motif chemokine 4 levels	0.00161289	4.01e-07	9.26e-06	0.00184993	25.5894	40.9189	22.3051
rs8064426	A	G	A	G	-0.4104	-0.0186	0.1459	0.1556	Prostate cancer	17	34819750	0.0125	0.1357	GCST90274770	17	34819750	0.0173	2.11e-124	C-C motif chemokine 4 levels	0.0378815	1.58e-05	2.88e-107	0.0419767	626.262	40.9189	562.759
rs9818901	A	T	A	T	-0.1185	0.0255	0.9445	0.9502	Prostate cancer	3	152777012	0.0188	0.1753	GCST90274770	3	152777012	0.0265	7.76e-06	C-C motif chemokine 4 levels	0.00135475	1.31e-05	0.000125878	0.00147218	21.732	40.9189	19.9961
rs10903115	A	G	A	G	-0.0559	0.014	0.4429	0.4385	Prostate cancer	1	25261696	0.0082	0.0862005	GCST90274771	1	25261696	0.0122	4.61e-06	Natural killer cell receptor 2B4 levels	0.00146763	2.08e-05	0.000120643	0.00154203	22.0604	40.9189	20.9944
rs10992054	T	C	T	C	-0.3705	-0.0541	0.9873	0.9892	Prostate cancer	9	92856642	0.053	0.3074	GCST90274771	9	92856642	0.0763	1.2e-06	Natural killer cell receptor 2B4 levels	0.00191302	7.43e-06	1.27e-05	0.00344238	42.4945	40.9189	23.5791
rs11020961	A	G	A	G	0.0768	-0.0077	0.8167	0.8203	Prostate cancer	11	94575608	0.0125	0.539499	GCST90274771	11	94575608	0.0161	1.84e-06	Natural killer cell receptor 2B4 levels	0.00159037	2.71e-06	1.33e-05	0.00176595	25.2712	40.9189	22.7547
rs11220506	A	G	A	G	-0.0702	0.0048	0.1876	0.1879	Prostate cancer	11	126335329	0.0104	0.6438	GCST90274771	11	126335329	0.0147	1.79e-06	Natural killer cell receptor 2B4 levels	0.00154616	1.52e-06	1.09e-05	0.00150213	22.1551	40.9189	22.8055
rs11265488	A	G	A	G	-0.0624	0.0011	0.4675	0.4598	Prostate cancer	1	160773957	0.0087	0.8989	GCST90274771	1	160773957	0.0118	1.24e-07	Natural killer cell receptor 2B4 levels	0.00195378	1.14e-07	5.81e-07	0.00193865	27.7475	40.9189	27.9644
rs11265493	A	G	A	G	0.2122	-0.0004	0.4066	0.3947	Prostate cancer	1	160803802	0.0088	0.9641	GCST90274771	1	160803802	0.0119	3.99e-71	Natural killer cell receptor 2B4 levels	0.0217749	1.47e-08	3.73e-64	0.0217288	317.29	40.9189	317.978
rs114344979	T	C	T	C	0.1066	-0.0084	0.0652	0.064	Prostate cancer	2	49094515	0.0169	0.618399	GCST90274771	2	49094515	0.024	8.93e-06	Natural killer cell receptor 2B4 levels	0.00133827	1.76e-06	4.68e-05	0.00138519	20.4211	40.9189	19.7284
rs114758826	A	G	A	G	-0.1804	0.0142	0.0393	0.0289	Prostate cancer	4	174530615	0.0258	0.5833	GCST90274771	4	174530615	0.0337	8.65e-08	Natural killer cell receptor 2B4 levels	0.00194216	2.16e-06	8.61e-07	0.00245744	36.2775	40.9189	28.6558
rs139924614	A	G	A	G	0.1618	-0.07	0.9666	0.9735	Prostate cancer	22	17214005	0.0286	0.0142001	GCST90274771	22	17214005	0.0348	3.33e-06	Natural killer cell receptor 2B4 levels	0.00146611	4.27e-05	0.000244957	0.00169036	24.9294	40.9189	21.6172
rs140189694	A	T	A	T	0.2783	-0.054	0.9887	0.9894	Prostate cancer	5	113042679	0.0393	0.1688	GCST90274771	5	113042679	0.0621	7.41e-06	Natural killer cell receptor 2B4 levels	0.00155061	1.35e-05	0.000101214	0.00173061	22.4191	40.9189	20.0837
rs145111742	T	C	T	C	0.3046	0.0592	0.0304	0.0073	Prostate cancer	9	129557272	0.0608	0.3303	GCST90274771	9	129557272	0.0689	9.83e-06	Natural killer cell receptor 2B4 levels	0.00158619	6.76e-06	7.46e-05	0.0054696	67.6571	40.9189	19.5444
rs145175118	T	C	T	C	0.2308	-0.0029	0.9818	0.9838	Prostate cancer	8	92927069	0.037	0.9374	GCST90274771	8	92927069	0.052	9.06e-06	Natural killer cell receptor 2B4 levels	0.00137717	4.38e-08	2.63e-05	0.00190369	27.2461	40.9189	19.6999
rs147033439	A	G	A	G	0.2053	0.03	0.0249	0.0198	Prostate cancer	1	88677329	0.031	0.3322	GCST90274771	1	88677329	0.0411	5.88e-07	Natural killer cell receptor 2B4 levels	0.00169116	6.68e-06	8.51e-06	0.00204671	30.2078	40.9189	24.9514
rs148214660	A	G	A	G	-0.2705	0.0394	0.0131	0.0128	Prostate cancer	3	112589458	0.0414	0.342	GCST90274771	3	112589458	0.0612	9.87e-06	Natural killer cell receptor 2B4 levels	0.00136571	6.46e-06	8.85e-05	0.00189195	27.0777	40.9189	19.5358
rs149212182	T	C	T	C	0.2642	-0.0171	0.0173	0.0135	Prostate cancer	20	60283624	0.0455	0.706999	GCST90274771	20	60283624	0.059	7.54e-06	Natural killer cell receptor 2B4 levels	0.0016251	1.01e-06	2.85e-05	0.00237336	29.3069	40.9189	20.0522
rs149458216	A	C	A	C	-0.2146	-0.0183	0.0182	0.0203	Prostate cancer	16	48902293	0.0329	0.577801	GCST90274771	16	48902293	0.047	4.97e-06	Natural killer cell receptor 2B4 levels	0.00141401	2.21e-06	3.03e-05	0.00164583	24.2714	40.9189	20.848
rs149826608	A	G	A	G	-0.3587	0.0677	0.007	0.0081	Prostate cancer	7	109234908	0.0548	0.2166	GCST90274771	7	109234908	0.0807	8.8e-06	Natural killer cell receptor 2B4 levels	0.00149971	1.09e-05	0.000101463	0.00178871	23.5709	40.9189	19.7568
rs1574847	C	G	C	G	-0.0637	0.0124	0.2366	0.2372	Prostate cancer	4	27611759	0.0098	0.2047	GCST90274771	4	27611759	0.0139	4.59e-06	Natural killer cell receptor 2B4 levels	0.00146802	1.14e-05	6.89e-05	0.0014658	20.9697	40.9189	21.0014
rs2554697	A	G	A	G	0.0627	0.0026	0.6347	0.6462	Prostate cancer	8	3921805	0.0086	0.761001	GCST90274771	8	3921805	0.0134	2.88e-06	Natural killer cell receptor 2B4 levels	0.00185513	6.52e-07	1.04e-05	0.00182299	21.514	40.9189	21.894
rs3184504	T	C	T	C	0.116	-0.0187	0.4764	0.4811	Prostate cancer	12	111884608	0.0082	0.0218102	GCST90274771	12	111884608	0.0128	1.27e-19	Natural killer cell receptor 2B4 levels	0.00692246	3.71e-05	7.69e-16	0.00671301	79.6272	40.9189	82.1289
rs34826779	T	G	T	G	0.063	0.0143	0.248	0.2536	Prostate cancer	8	106570964	0.0095	0.1294	GCST90274771	8	106570964	0.0138	4.99e-06	Natural killer cell receptor 2B4 levels	0.00145683	1.62e-05	0.000100133	0.0014804	21.1789	40.9189	20.8412
rs3828139	T	C	T	C	0.0744	0.0039	0.4677	0.4702	Prostate cancer	1	44253015	0.008	0.6285	GCST90274771	1	44253015	0.0119	4.05e-10	Natural killer cell receptor 2B4 levels	0.00272907	1.69e-06	6.44e-09	0.00275613	39.4774	40.9189	39.0888
rs4672486	A	G	A	G	0.0661	0.0217	0.4329	0.4218	Prostate cancer	2	62495209	0.0086	0.01167	GCST90274771	2	62495209	0.0117	1.61e-08	Natural killer cell receptor 2B4 levels	0.00216392	4.54e-05	4.33e-06	0.00214526	31.6418	40.9189	31.9177
rs56272634	T	C	T	C	0.0704	-0.0089	0.6994	0.7072	Prostate cancer	2	111846068	0.0088	0.3114	GCST90274771	2	111846068	0.0126	2.31e-08	Natural killer cell receptor 2B4 levels	0.00211529	7.29e-06	5.69e-07	0.00208396	30.7546	40.9189	31.2179
rs60006581	A	G	A	G	0.0905	0.0039	0.9052	0.9078	Prostate cancer	21	38144075	0.0161	0.806	GCST90274771	21	38144075	0.0203	8.27e-06	Natural killer cell receptor 2B4 levels	0.00134819	4.18e-07	3.11e-05	0.00140566	20.7232	40.9189	19.8749
rs61865960	T	C	T	C	0.2604	0.0285	0.9697	0.9864	Prostate cancer	10	95662408	0.0422	0.4997	GCST90274771	10	95662408	0.0584	8.24e-06	Natural killer cell receptor 2B4 levels	0.00168093	3.25e-06	4.26e-05	0.00398467	47.2392	40.9189	19.8818
rs6928352	A	G	A	G	-0.1074	-0.0227	0.0794	0.0802	Prostate cancer	6	614064	0.0147	0.122	GCST90274771	6	614064	0.0215	5.87e-07	Natural killer cell receptor 2B4 levels	0.00169131	1.7e-05	1.92e-05	0.00168628	24.8792	40.9189	24.9535
rs72837690	T	C	T	C	-0.0776	-0.0177	0.6405	0.6471	Prostate cancer	17	7088423	0.0085	0.0381496	GCST90274771	17	7088423	0.0125	5.37e-10	Natural killer cell receptor 2B4 levels	0.00269062	3.09e-05	1.3e-07	0.00277314	39.7244	40.9189	38.5393
rs73173072	A	T	A	T	0.1576	0.0275	0.9675	0.9672	Prostate cancer	3	167513752	0.0262	0.2929	GCST90274771	3	167513752	0.0353	8.02e-06	Natural killer cell receptor 2B4 levels	0.00135265	7.86e-06	8.75e-05	0.00156198	23.0221	40.9189	19.9326
rs78142752	T	C	T	C	0.2288	0.0132	0.0184	0.0153	Prostate cancer	5	96078542	0.0374	0.724499	GCST90274771	5	96078542	0.0497	4.15e-06	Natural killer cell receptor 2B4 levels	0.00143652	8.88e-07	1.96e-05	0.00189101	27.9112	40.9189	21.1933
rs1081489	A	G	A	G	-0.0789	0.0321	0.8552	0.8592	Prostate cancer	10	84407842	0.0118	0.00653597	GCST90274772	10	84407842	0.0176	7.36e-06	CD40L receptor levels	0.00164538	5.28e-05	0.000416752	0.00154177	18.8294	40.9189	20.0969
rs117191103	T	C	T	C	0.3553	0.0036	0.0208	0.0201	Prostate cancer	20	44464356	0.0314	0.908	GCST90274772	20	44464356	0.0437	4.28e-16	CD40L receptor levels	0.00446645	9.37e-08	1.44e-14	0.00514227	76.1579	40.9189	66.104
rs11755766	T	C	T	C	-0.0504	-0.0055	0.5049	0.5003	Prostate cancer	6	10178951	0.0082	0.4987	GCST90274772	6	10178951	0.0112	6.8e-06	CD40L receptor levels	0.00137258	3.21e-06	4.64e-05	0.00126996	18.7341	40.9189	20.25
rs12500563	T	G	T	G	0.3143	-0.0001	0.9875	0.9896	Prostate cancer	4	7304426	0.042	0.9984	GCST90274772	4	7304426	0.0687	4.76e-06	CD40L receptor levels	0.00193549	4.04e-11	1.05e-05	0.00243874	26.3857	40.9189	20.9303
rs138739860	T	G	T	G	0.1632	0.0336	0.9648	0.9621	Prostate cancer	21	18103398	0.0241	0.163	GCST90274772	21	18103398	0.0351	3.33e-06	CD40L receptor levels	0.00180175	1.39e-05	4.69e-05	0.00180905	21.7062	40.9189	21.6185
rs138897138	A	G	A	G	0.109	0.0282	0.914	0.9149	Prostate cancer	2	122731427	0.0156	0.0701294	GCST90274772	2	122731427	0.0216	4.5e-07	CD40L receptor levels	0.00177935	2.33e-05	2.08e-05	0.00186779	26.7332	40.9189	25.4651
rs144949926	A	G	A	G	-0.2655	-0.0337	0.9784	0.9903	Prostate cancer	3	20921481	0.0493	0.4939	GCST90274772	3	20921481	0.0591	7.04e-06	CD40L receptor levels	0.00141069	3.33e-06	4.69e-05	0.0029794	42.6909	40.9189	20.1815
rs149900704	A	G	A	G	-0.1956	0.0096	0.0203	0.019	Prostate cancer	8	111799116	0.0305	0.751799	GCST90274772	8	111799116	0.0442	9.63e-06	CD40L receptor levels	0.00132774	7.06e-07	3.93e-05	0.0015218	22.4502	40.9189	19.5836
rs17372980	T	C	T	C	-0.0611	-0.0086	0.7421	0.7407	Prostate cancer	1	59140291	0.0095	0.365	GCST90274772	1	59140291	0.0134	5.12e-06	CD40L receptor levels	0.00145322	5.84e-06	4.75e-05	0.00142898	20.4436	40.9189	20.7909
rs187640246	T	C	T	C	-0.2717	0.0244	0.0134	0.0082	Prostate cancer	20	30007295	0.052	0.6385	GCST90274772	20	30007295	0.0604	6.85e-06	CD40L receptor levels	0.0015796	1.57e-06	3.05e-05	0.00195189	25.0135	40.9189	20.2351
rs1883832	T	C	T	C	-0.4519	0.001	0.2575	0.257	Prostate cancer	20	44746982	0.0093	0.9127	GCST90274772	20	44746982	0.0126	1.07e-281	CD40L receptor levels	0.0802921	8.24e-08	1.39e-247	0.0780887	1248.02	40.9189	1286.3
rs34755276	A	G	A	G	0.0587	-0.0033	0.3475	0.3443	Prostate cancer	19	57755822	0.0085	0.6998	GCST90274772	19	57755822	0.0131	7.43e-06	CD40L receptor levels	0.00161649	1.07e-06	2.88e-05	0.00156258	19.4078	40.9189	20.0786
rs35864161	T	G	T	G	-0.1269	-0.005	0.9543	0.9594	Prostate cancer	17	66365155	0.0238	0.8347	GCST90274772	17	66365155	0.0284	7.88e-06	CD40L receptor levels	0.00135334	3.15e-07	2.85e-05	0.0014046	20.7232	40.9189	19.9658
rs3967170	A	G	A	G	0.0789	0.0165	0.1353	0.1256	Prostate cancer	3	3773438	0.0122	0.1786	GCST90274772	3	3773438	0.017	3.46e-06	CD40L receptor levels	0.00146131	1.3e-05	6.41e-05	0.00145662	21.4713	40.9189	21.5405
rs404842	A	G	A	G	-0.0599	-0.0042	0.6433	0.6502	Prostate cancer	16	84304113	0.0084	0.617999	GCST90274772	16	84304113	0.0123	1.12e-06	CD40L receptor levels	0.00165746	1.78e-06	7.26e-06	0.00164665	23.5611	40.9189	23.7161
rs4278412	C	G	C	G	0.1978	0.0289	0.0203	0.0217	Prostate cancer	1	211450157	0.0279	0.2996	GCST90274772	1	211450157	0.0413	1.67e-06	CD40L receptor levels	0.00155554	7.65e-06	2.28e-05	0.00155622	22.948	40.9189	22.9378
rs4664334	T	C	T	C	0.0541	-0.0125	0.5003	0.5092	Prostate cancer	2	161368905	0.0083	0.1306	GCST90274772	2	161368905	0.0118	4.55e-06	CD40L receptor levels	0.0014692	1.62e-05	9.28e-05	0.0014634	20.9368	40.9189	21.0199
rs7250371	T	C	T	C	0.0686	0.0093	0.3648	0.3555	Prostate cancer	19	57861085	0.0083	0.2661	GCST90274772	19	57861085	0.0116	3.34e-09	CD40L receptor levels	0.00237025	8.95e-06	1.3e-07	0.00218094	32.1736	40.9189	34.9729
rs73128569	A	T	A	T	-0.1788	0.0147	0.9406	0.9436	Prostate cancer	20	44606446	0.0187	0.4322	GCST90274772	20	44606446	0.0268	2.53e-11	CD40L receptor levels	0.00310602	4.41e-06	9.76e-10	0.00357237	51.2178	40.9189	44.5108
rs75626299	C	G	C	G	0.1458	0.0092	0.9638	0.9641	Prostate cancer	9	29426599	0.0232	0.6899	GCST90274772	9	29426599	0.0316	3.95e-06	CD40L receptor levels	0.00144354	1.12e-06	1.99e-05	0.00148334	21.8761	40.9189	21.2883
rs7798473	A	C	A	C	-0.1041	0.0063	0.0609	0.0611	Prostate cancer	7	108543387	0.0168	0.708401	GCST90274772	7	108543387	0.0235	9.43e-06	CD40L receptor levels	0.00133023	1e-06	4.18e-05	0.00123954	18.2836	40.9189	19.623
rs8024256	A	G	A	G	-0.0562	0.0061	0.3092	0.2935	Prostate cancer	15	26829521	0.0091	0.506499	GCST90274772	15	26829521	0.0121	3.41e-06	CD40L receptor levels	0.001462	3.2e-06	2.55e-05	0.00134926	19.9068	40.9189	21.5726
rs9526031	A	C	A	C	0.064	0.0016	0.4882	0.4851	Prostate cancer	13	45595067	0.0084	0.853	GCST90274772	13	45595067	0.012	9.64e-08	CD40L receptor levels	0.00198711	2.59e-07	5.14e-07	0.00204686	29.3014	40.9189	28.4444
rs9993874	A	G	A	G	-0.0582	-0.006	0.4883	0.49	Prostate cancer	4	55046724	0.0083	0.4706	GCST90274772	4	55046724	0.0125	3.22e-06	CD40L receptor levels	0.00174506	3.73e-06	2.09e-05	0.00169269	21.0267	40.9189	21.6783
rs11622090	T	C	T	C	-0.0588	-0.0022	0.3206	0.3129	Prostate cancer	14	93329692	0.0088	0.8038	GCST90274773	14	93329692	0.0128	4.35e-06	T-cell surface glycoprotein CD5 levels	0.00159203	4.46e-07	1.59e-05	0.00150617	19.9627	40.9189	21.1025
rs117276991	A	G	A	G	-0.1261	0.0347	0.0751	0.0629	Prostate cancer	10	6251691	0.0187	0.0631902	GCST90274773	10	6251691	0.0256	8.4e-07	T-cell surface glycoprotein CD5 levels	0.00169564	2.46e-05	3.68e-05	0.002209	31.6254	40.9189	24.2633
rs117516652	A	G	A	G	0.2374	-0.0364	0.9826	0.983	Prostate cancer	13	39003323	0.0345	0.2923	GCST90274773	13	39003323	0.0476	6.12e-07	T-cell surface glycoprotein CD5 levels	0.001743	7.94e-06	9.42e-06	0.00192716	27.5073	40.9189	24.8741
rs12416520	A	G	A	G	-0.0629	-0.0119	0.7492	0.7498	Prostate cancer	10	71211945	0.0093	0.202	GCST90274773	10	71211945	0.0132	1.89e-06	T-cell surface glycoprotein CD5 levels	0.00154156	1.17e-05	3.51e-05	0.00148681	21.8991	40.9189	22.7067
rs1259355	A	G	A	G	0.0569	-0.0044	0.4361	0.4473	Prostate cancer	12	31688535	0.008	0.580899	GCST90274773	12	31688535	0.0119	1.74e-06	T-cell surface glycoprotein CD5 levels	0.00159792	2.16e-06	1.15e-05	0.00159237	22.7832	40.9189	22.8629
rs138861398	A	C	A	C	-0.0803	-0.0031	0.2321	0.2363	Prostate cancer	4	77211819	0.0096	0.744501	GCST90274773	4	77211819	0.0151	1.05e-07	T-cell surface glycoprotein CD5 levels	0.00235798	7.43e-07	5.39e-07	0.00229848	27.5647	40.9189	28.2799
rs16541	A	G	A	G	-0.0679	0.0055	0.7871	0.7999	Prostate cancer	17	37365138	0.0106	0.5999	GCST90274773	17	37365138	0.015	5.99e-06	T-cell surface glycoprotein CD5 levels	0.00143237	1.92e-06	3.27e-05	0.00154517	22.1069	40.9189	20.4907
rs17345759	A	C	A	C	-0.1134	0.01	0.9301	0.9332	Prostate cancer	7	97499410	0.0173	0.5659	GCST90274773	7	97499410	0.0245	3.68e-06	T-cell surface glycoprotein CD5 levels	0.00149749	2.38e-06	2.31e-05	0.0016721	23.926	40.9189	21.4237
rs17769062	T	C	T	C	0.1638	-0.0126	0.9589	0.963	Prostate cancer	9	27496604	0.0249	0.6127	GCST90274773	9	27496604	0.0334	9.38e-07	T-cell surface glycoprotein CD5 levels	0.00168083	1.83e-06	6.28e-06	0.00211482	30.2742	40.9189	24.0511
rs192582121	A	T	A	T	-0.4169	0.1221	0.9916	0.9928	Prostate cancer	9	105614669	0.0532	0.0216401	GCST90274773	9	105614669	0.0806	2.31e-07	T-cell surface glycoprotein CD5 levels	0.00233402	3.76e-05	1.42e-05	0.00289541	33.208	40.9189	26.7543
rs193245191	A	G	A	G	-0.3109	0.008	0.0109	0.0076	Prostate cancer	11	102724025	0.0514	0.8759	GCST90274773	11	102724025	0.0696	7.93e-06	T-cell surface glycoprotein CD5 levels	0.0016212	1.73e-07	2.26e-05	0.00208419	25.6641	40.9189	19.9537
rs2237450	T	C	T	C	0.0623	0.0259	0.6389	0.6322	Prostate cancer	7	50716017	0.0088	0.00314499	GCST90274773	7	50716017	0.0124	5.06e-07	T-cell surface glycoprotein CD5 levels	0.00176395	6.18e-05	0.000100245	0.00179088	25.6286	40.9189	25.2425
rs3104373	T	C	T	C	0.0973	0.0242	0.1469	0.1366	Prostate cancer	6	32600375	0.0115	0.0349197	GCST90274773	6	32600375	0.0165	3.7e-09	T-cell surface glycoprotein CD5 levels	0.00235474	3.16e-05	7.1e-07	0.00237289	35.0429	40.9189	34.7743
rs3184504	T	C	T	C	0.1427	-0.0187	0.4764	0.4811	Prostate cancer	12	111884608	0.0082	0.0218102	GCST90274773	12	111884608	0.0128	7.29e-29	T-cell surface glycoprotein CD5 levels	0.0104388	3.71e-05	8.84e-24	0.010159	120.921	40.9189	124.288
rs4073745	A	G	A	G	-0.0683	-0.0103	0.7003	0.6883	Prostate cancer	5	176733341	0.0091	0.2569	GCST90274773	5	176733341	0.0131	1.85e-07	T-cell surface glycoprotein CD5 levels	0.0018993	9.13e-06	3.82e-06	0.00195813	28.0268	40.9189	27.1831
rs4893	A	G	A	G	0.1471	0.0427	0.9627	0.9595	Prostate cancer	19	48833608	0.0237	0.0717398	GCST90274773	19	48833608	0.0313	2.61e-06	T-cell surface glycoprotein CD5 levels	0.00149691	2.31e-05	9.08e-05	0.00155401	22.9309	40.9189	22.087
rs4910962	A	C	A	C	0.1465	-0.02	0.9341	0.9394	Prostate cancer	11	4281522	0.021	0.3412	GCST90274773	11	4281522	0.0312	2.66e-06	T-cell surface glycoprotein CD5 levels	0.00187163	6.47e-06	2.2e-05	0.00264231	31.1506	40.9189	22.0478
rs4939490	C	G	C	G	0.1083	0.0019	0.6328	0.6182	Prostate cancer	11	60793651	0.0085	0.82	GCST90274773	11	60793651	0.012	1.8e-19	T-cell surface glycoprotein CD5 levels	0.00549805	3.56e-07	1.77e-17	0.00545075	80.746	40.9189	81.4506
rs60562286	A	T	A	T	-0.1681	-0.0103	0.0327	0.028	Prostate cancer	10	114454187	0.0265	0.6987	GCST90274773	10	114454187	0.0352	1.79e-06	T-cell surface glycoprotein CD5 levels	0.00154651	1.08e-06	9.78e-06	0.00178762	26.368	40.9189	22.8061
rs61747728	T	C	T	C	0.1841	-0.008	0.0399	0.0421	Prostate cancer	1	179526214	0.0209	0.7011	GCST90274773	1	179526214	0.0313	4.06e-09	T-cell surface glycoprotein CD5 levels	0.00241595	1.04e-06	4.15e-08	0.00259673	37.1909	40.9189	34.5954
rs61768480	A	G	A	G	0.0695	-0.0087	0.2776	0.267	Prostate cancer	1	1103150	0.0111	0.4341	GCST90274773	1	1103150	0.0147	2.27e-06	T-cell surface glycoprotein CD5 levels	0.00163275	4.38e-06	1.88e-05	0.0019373	26.5304	40.9189	22.353
rs6488973	A	G	A	G	-0.0613	0.0003	0.2804	0.278	Prostate cancer	12	125487245	0.01	0.9768	GCST90274773	12	125487245	0.0135	5.61e-06	T-cell surface glycoprotein CD5 levels	0.00139874	6.42e-09	1.64e-05	0.00151642	22.3556	40.9189	20.6183
rs674379	C	G	C	G	0.1193	0.0102	0.6395	0.6283	Prostate cancer	11	60922561	0.0083	0.2209	GCST90274773	11	60922561	0.0126	2.85e-21	T-cell surface glycoprotein CD5 levels	0.00693726	1.08e-05	3.44e-18	0.00656231	84.7704	40.9189	89.6478
rs7012814	A	G	A	G	-0.0533	0.0211	0.4819	0.4707	Prostate cancer	8	9173358	0.0083	0.01065	GCST90274773	8	9173358	0.0119	7.5e-06	T-cell surface glycoprotein CD5 levels	0.0014024	4.61e-05	0.000477722	0.00141858	20.2933	40.9189	20.0614
rs7242462	A	G	A	G	-0.1199	-0.0193	0.8853	0.8894	Prostate cancer	18	45545720	0.014	0.1684	GCST90274773	18	45545720	0.0187	1.44e-10	T-cell surface glycoprotein CD5 levels	0.00286964	1.36e-05	1.3e-08	0.00291959	41.8285	40.9189	41.1107
rs72821405	T	C	T	C	-0.1014	-0.0167	0.0833	0.0834	Prostate cancer	6	4714797	0.0166	0.3147	GCST90274773	6	4714797	0.0217	2.97e-06	T-cell surface glycoprotein CD5 levels	0.00148067	7.22e-06	3.57e-05	0.00157028	23.1588	40.9189	21.8352
rs7295476	A	T	A	T	-0.118	-0.0008	0.0501	0.0476	Prostate cancer	12	74680262	0.0191	0.967	GCST90274773	12	74680262	0.0265	8.47e-06	T-cell surface glycoprotein CD5 levels	0.00134399	1.25e-08	2.42e-05	0.00132529	19.5514	40.9189	19.8277
rs7298384	A	G	A	G	-0.1418	-0.02	0.9625	0.9658	Prostate cancer	12	129141888	0.0242	0.4082	GCST90274773	12	129141888	0.032	9.37e-06	T-cell surface glycoprotein CD5 levels	0.00133255	4.87e-06	7.5e-05	0.00145149	21.3912	40.9189	19.636
rs74796205	A	G	A	G	0.2987	-0.0537	0.9884	0.989	Prostate cancer	8	67386869	0.0475	0.2582	GCST90274773	8	67386869	0.0657	5.46e-06	T-cell surface glycoprotein CD5 levels	0.0014958	9.11e-06	6.38e-05	0.00204593	28.2876	40.9189	20.67
rs11230863	A	G	A	G	0.0647	0.0069	0.7396	0.7297	Prostate cancer	11	61779047	0.0091	0.4458	GCST90274774	11	61779047	0.0133	1.15e-06	T-cell surface glycoprotein CD6 isoform levels	0.00160411	4.1e-06	1.12e-05	0.00161241	23.7876	40.9189	23.6649
rs13109330	T	C	T	C	-0.0685	0.0076	0.3846	0.3829	Prostate cancer	4	83102052	0.0084	0.3643	GCST90274774	4	83102052	0.0129	1.1e-07	T-cell surface glycoprotein CD6 isoform levels	0.00226842	5.84e-06	1.37e-06	0.00222115	27.608	40.9189	28.1969
rs1483572	A	C	A	C	0.0602	0.0072	0.3374	0.3313	Prostate cancer	8	79635243	0.0086	0.4012	GCST90274774	8	79635243	0.0124	1.2e-06	T-cell surface glycoprotein CD6 isoform levels	0.00164723	5e-06	1.25e-05	0.00162039	23.1848	40.9189	23.5695
rs4938993	C	G	C	G	-0.5114	0.012	0.2252	0.2103	Prostate cancer	11	60813632	0.01	0.2324	GCST90274774	11	60813632	0.0138	1.34e-300	T-cell surface glycoprotein CD6 isoform levels	0.0877039	1.03e-05	2.97e-259	0.0912661	1434.67	40.9189	1373.29
rs653178	T	C	T	C	-0.1085	0.019	0.5224	0.5179	Prostate cancer	12	112007756	0.0082	0.0203601	GCST90274774	12	112007756	0.0131	1.21e-16	T-cell surface glycoprotein CD6 isoform levels	0.00578864	3.83e-05	2.83e-13	0.00587431	69.6201	40.9189	68.5989
rs72969761	A	T	A	T	-0.1796	-0.0005	0.97	0.9718	Prostate cancer	2	227938476	0.0257	0.9856	GCST90274774	2	227938476	0.0376	1.78e-06	T-cell surface glycoprotein CD6 isoform levels	0.00154885	2.7e-09	5.71e-06	0.00187731	27.6634	40.9189	22.8159
rs9691968	A	C	A	C	0.0646	-0.0031	0.2505	0.2389	Prostate cancer	7	153635380	0.0102	0.7604	GCST90274774	7	153635380	0.0134	1.43e-06	T-cell surface glycoprotein CD6 isoform levels	0.001575	6.59e-07	7.09e-06	0.00156702	23.1231	40.9189	23.241
rs10044847	C	G	C	G	-0.0781	-0.0055	0.8283	0.8534	Prostate cancer	5	2103391	0.0123	0.6582	GCST90274775	5	2103391	0.0156	5.55e-07	CUB domain-containing protein 1 levels	0.00170018	1.43e-06	3.77e-06	0.00173496	25.5778	40.9189	25.0641
rs10465082	T	C	T	C	-0.0504	-0.0048	0.5023	0.5076	Prostate cancer	9	35993938	0.0085	0.5675	GCST90274775	9	35993938	0.0112	6.8e-06	CUB domain-containing protein 1 levels	0.00137276	2.27e-06	4.03e-05	0.00127005	18.7329	40.9189	20.25
rs10964983	C	G	C	G	-0.0616	0.0131	0.5862	0.5848	Prostate cancer	9	21413803	0.0083	0.1174	GCST90274775	9	21413803	0.0114	6.53e-08	CUB domain-containing protein 1 levels	0.00197936	1.78e-05	3.28e-06	0.00184089	27.1516	40.9189	29.1979
rs111476793	A	G	A	G	0.0895	0.0044	0.1339	0.1239	Prostate cancer	4	53951496	0.0131	0.737901	GCST90274775	4	53951496	0.0182	8.76e-07	CUB domain-containing protein 1 levels	0.00188747	8.04e-07	4.05e-06	0.00185791	23.8032	40.9189	24.1826
rs111984955	C	G	C	G	0.2058	-0.0001	0.9817	0.9826	Prostate cancer	12	15991375	0.0355	0.9982	GCST90274775	12	15991375	0.0461	8.04e-06	CUB domain-containing protein 1 levels	0.00135178	5.66e-11	2.19e-05	0.00152178	22.4392	40.9189	19.9292
rs115009171	A	G	A	G	0.4223	-0.0821	0.0078	0.0063	Prostate cancer	6	622484	0.0618	0.1845	GCST90274775	6	622484	0.0932	5.87e-06	CUB domain-containing protein 1 levels	0.00198972	1.26e-05	5.71e-05	0.00276036	28.5049	40.9189	20.531
rs118116993	A	T	A	T	0.0957	0.0158	0.0969	0.0916	Prostate cancer	6	162326838	0.0142	0.2667	GCST90274775	6	162326838	0.0197	1.19e-06	CUB domain-containing protein 1 levels	0.00164939	8.83e-06	1.8e-05	0.00160293	22.933	40.9189	23.5989
rs11864674	A	C	A	C	0.2029	0.0361	0.0186	0.0174	Prostate cancer	16	66391749	0.0337	0.2847	GCST90274775	16	66391749	0.0458	9.42e-06	CUB domain-containing protein 1 levels	0.00137595	8.18e-06	9.84e-05	0.00150298	21.4407	40.9189	19.6261
rs12290068	A	G	A	G	0.1221	-0.0035	0.3187	0.3152	Prostate cancer	11	126261564	0.0091	0.7021	GCST90274775	11	126261564	0.0122	1.4e-23	CUB domain-containing protein 1 levels	0.00675681	1.05e-06	5.93e-21	0.00647413	95.9463	40.9189	100.164
rs12928188	A	T	A	T	-0.0658	-0.01	0.2312	0.2233	Prostate cancer	16	79183747	0.0098	0.3077	GCST90274775	16	79183747	0.0134	9.09e-07	CUB domain-containing protein 1 levels	0.00163617	7.42e-06	1.33e-05	0.00153916	22.6805	40.9189	24.1125
rs1463919	A	C	A	C	0.0507	0.0014	0.4982	0.499	Prostate cancer	8	91776995	0.0084	0.8677	GCST90274775	8	91776995	0.0113	7.23e-06	CUB domain-containing protein 1 levels	0.00140743	1.98e-07	2.42e-05	0.00128523	18.3805	40.9189	20.1307
rs146583535	A	G	A	G	0.4557	0.0342	0.0265	0.0058	Prostate cancer	20	18761853	0.0631	0.5877	GCST90274775	20	18761853	0.0968	2.51e-06	CUB domain-containing protein 1 levels	0.00264079	2.09e-06	8.9e-06	0.0107145	90.6512	40.9189	22.1619
rs17078000	A	G	A	G	0.0609	-0.0064	0.7179	0.7106	Prostate cancer	13	84915900	0.009	0.4773	GCST90274775	13	84915900	0.0128	1.96e-06	CUB domain-containing protein 1 levels	0.00158226	3.61e-06	1.6e-05	0.00150221	21.4899	40.9189	22.6368
rs17607930	A	G	A	G	0.1654	-0.0209	0.9669	0.9727	Prostate cancer	12	60829749	0.0281	0.4574	GCST90274775	12	60829749	0.037	7.81e-06	CUB domain-containing protein 1 levels	0.00139705	3.94e-06	5.54e-05	0.0017511	25.0566	40.9189	19.9833
rs191929998	A	G	A	G	-0.1938	0.0032	0.9581	0.9606	Prostate cancer	22	31852311	0.0259	0.9023	GCST90274775	22	31852311	0.0409	2.15e-06	CUB domain-containing protein 1 levels	0.00227608	1.09e-07	5.45e-06	0.00301552	29.7685	40.9189	22.4523
rs2276862	C	G	C	G	0.303	-0.0234	0.8212	0.824	Prostate cancer	3	45187785	0.0114	0.0392103	GCST90274775	3	45187785	0.0146	1.14e-95	CUB domain-containing protein 1 levels	0.028413	3e-05	1.3e-80	0.0269607	408.08	40.9189	430.705
rs28535751	T	C	T	C	-0.0541	0.0179	0.6294	0.6313	Prostate cancer	14	59010649	0.0086	0.0369003	GCST90274775	14	59010649	0.0118	4.55e-06	CUB domain-containing protein 1 levels	0.00142488	3.09e-05	0.00020035	0.00136539	20.1411	40.9189	21.0199
rs2990246	C	G	C	G	-0.0566	0.017	0.4028	0.3948	Prostate cancer	1	155197602	0.0084	0.0415298	GCST90274775	1	155197602	0.012	2.4e-06	CUB domain-containing protein 1 levels	0.00155505	2.92e-05	0.00010583	0.00154125	22.0491	40.9189	22.2469
rs34027772	T	C	T	C	0.0757	-0.0203	0.2607	0.2602	Prostate cancer	3	43423959	0.0101	0.0443905	GCST90274775	3	43423959	0.0143	1.2e-07	CUB domain-containing protein 1 levels	0.00225467	2.88e-05	6.82e-06	0.00220894	27.4537	40.9189	28.0233
rs35176543	T	G	T	G	0.0894	-0.0038	0.0924	0.097	Prostate cancer	11	17556914	0.0143	0.791701	GCST90274775	11	17556914	0.0201	8.68e-06	CUB domain-containing protein 1 levels	0.00138303	5.03e-07	3.25e-05	0.00134051	19.1736	40.9189	19.7826
rs35478654	T	C	T	C	-0.148	0.0267	0.0367	0.0383	Prostate cancer	3	58453757	0.0213	0.2111	GCST90274775	3	58453757	0.0312	2.1e-06	CUB domain-containing protein 1 levels	0.001526	1.12e-05	3.71e-05	0.00154875	22.8376	40.9189	22.5016
rs4804148	T	C	T	C	-0.0619	-0.014	0.7187	0.7336	Prostate cancer	19	11270867	0.0096	0.1439	GCST90274775	19	11270867	0.0125	7.35e-07	CUB domain-containing protein 1 levels	0.00166179	1.52e-05	2.05e-05	0.00154928	22.8593	40.9189	24.5223
rs573808300	A	G	A	G	-0.2998	-0.0309	0.0121	0.0136	Prostate cancer	7	89774204	0.0364	0.3957	GCST90274775	7	89774204	0.0599	5.59e-07	CUB domain-containing protein 1 levels	0.00213355	5.14e-06	4.86e-06	0.00214878	25.2293	40.9189	25.0501
rs59752567	T	G	T	G	-0.0923	0.0143	0.0938	0.0964	Prostate cancer	15	58791416	0.0157	0.3646	GCST90274775	15	58791416	0.0204	6.05e-06	CUB domain-containing protein 1 levels	0.00138802	5.92e-06	5.76e-05	0.00144831	21.3616	40.9189	20.4712
rs59872649	A	G	A	G	-0.1093	-0.0198	0.0652	0.0605	Prostate cancer	2	148430383	0.0172	0.2505	GCST90274775	2	148430383	0.0232	2.46e-06	CUB domain-containing protein 1 levels	0.00150435	9.45e-06	3.7e-05	0.00145625	21.4848	40.9189	22.1955
rs61782461	T	C	T	C	-0.2176	0.0261	0.9829	0.9852	Prostate cancer	1	101804329	0.0356	0.4632	GCST90274775	1	101804329	0.0471	3.84e-06	CUB domain-containing protein 1 levels	0.00149203	3.83e-06	2.95e-05	0.00159167	22.7717	40.9189	21.344
rs6452820	A	G	A	G	-0.0738	0.0127	0.8367	0.8439	Prostate cancer	5	72411335	0.0113	0.2647	GCST90274775	5	72411335	0.0159	3.46e-06	CUB domain-containing protein 1 levels	0.00150596	9.01e-06	4.53e-05	0.00148833	21.291	40.9189	21.5436
rs672806	A	G	A	G	0.0816	-0.0036	0.4097	0.414	Prostate cancer	11	126188405	0.0082	0.6633	GCST90274775	11	126188405	0.0116	2e-12	CUB domain-containing protein 1 levels	0.00345233	1.37e-06	5.24e-11	0.00322069	46.153	40.9189	49.4839
rs6991332	T	C	T	C	-0.0579	0.0051	0.6455	0.648	Prostate cancer	8	61937553	0.0085	0.5461	GCST90274775	8	61937553	0.0119	1.14e-06	CUB domain-containing protein 1 levels	0.0016546	2.57e-06	8.53e-06	0.00153426	21.9491	40.9189	23.6735
rs74811341	T	C	T	C	-0.1323	0.0247	0.0513	0.0484	Prostate cancer	17	38720826	0.0221	0.2643	GCST90274775	17	38720826	0.0277	1.79e-06	CUB domain-containing protein 1 levels	0.00154606	8.91e-06	2.7e-05	0.00170371	25.1419	40.9189	22.8118
rs7506429	A	C	A	C	0.0737	-0.0082	0.7965	0.8026	Prostate cancer	18	19991319	0.0117	0.484299	GCST90274775	18	19991319	0.0144	3.09e-07	CUB domain-containing protein 1 levels	0.00183048	3.5e-06	3.15e-06	0.00176082	25.1959	40.9189	26.1945
rs75892552	T	G	T	G	-0.1259	0.0377	0.0544	0.0483	Prostate cancer	17	36021431	0.0193	0.0506396	GCST90274775	17	36021431	0.0279	6.41e-06	CUB domain-containing protein 1 levels	0.00142356	2.72e-05	0.000212287	0.00163075	23.3317	40.9189	20.3631
rs7618923	T	C	T	C	-0.1738	-0.0065	0.1811	0.1825	Prostate cancer	3	45130725	0.0118	0.5805	GCST90274775	3	45130725	0.0151	1.18e-30	CUB domain-containing protein 1 levels	0.00918938	2.16e-06	4.26e-27	0.0089594	129.133	40.9189	132.479
rs10042665	C	G	C	G	0.0583	-0.0022	0.3043	0.2986	Prostate cancer	5	78775099	0.009	0.8104	GCST90274776	5	78775099	0.0122	1.76e-06	Macrophage colony-stimulating factor 1 levels	0.00154842	4.26e-07	7.85e-06	0.0014391	21.2213	40.9189	22.8359
rs115370595	A	G	A	G	-0.2277	0.0185	0.9815	0.984	Prostate cancer	2	140484970	0.0365	0.6128	GCST90274776	2	140484970	0.0496	4.42e-06	Macrophage colony-stimulating factor 1 levels	0.00152516	1.83e-06	2.36e-05	0.00188286	26.0268	40.9189	21.0748
rs116039112	A	G	A	G	0.2238	0.0193	0.016	0.0163	Prostate cancer	4	154438727	0.0342	0.572	GCST90274776	4	154438727	0.0504	8.98e-06	Macrophage colony-stimulating factor 1 levels	0.00137851	2.27e-06	4.96e-05	0.00157712	22.5632	40.9189	19.7178
rs116443177	T	C	T	C	0.0827	-0.0182	0.1595	0.156	Prostate cancer	2	27764122	0.0111	0.1016	GCST90274776	2	27764122	0.0173	1.75e-06	Macrophage colony-stimulating factor 1 levels	0.00183934	1.92e-05	3.9e-05	0.00183375	22.7821	40.9189	22.8517
rs11685487	T	C	T	C	0.0944	-0.0021	0.1197	0.1198	Prostate cancer	2	8775320	0.0168	0.8995	GCST90274776	2	8775320	0.0196	1.46e-06	Macrophage colony-stimulating factor 1 levels	0.00162135	1.11e-07	5.39e-06	0.00187801	26.876	40.9189	23.197
rs117591817	C	G	C	G	-0.1989	-0.0128	0.0348	0.0164	Prostate cancer	19	58875573	0.0404	0.7516	GCST90274776	19	58875573	0.0435	4.82e-06	Macrophage colony-stimulating factor 1 levels	0.00146152	7.16e-07	2.06e-05	0.00265764	38.0629	40.9189	20.907
rs11806838	T	C	T	C	0.0674	-0.0054	0.185	0.1893	Prostate cancer	1	190519358	0.0107	0.6155	GCST90274776	1	190519358	0.0152	9.24e-06	Macrophage colony-stimulating factor 1 levels	0.00137463	1.82e-06	4.71e-05	0.00136987	19.5941	40.9189	19.6622
rs12549430	A	G	A	G	-0.061	0.0045	0.738	0.745	Prostate cancer	8	80715263	0.0098	0.6422	GCST90274776	8	80715263	0.0135	6.23e-06	Macrophage colony-stimulating factor 1 levels	0.00142732	1.5e-06	3.13e-05	0.00143896	20.5837	40.9189	20.417
rs142421172	A	G	A	G	0.1439	-0.0018	0.044	0.0474	Prostate cancer	1	179682087	0.0204	0.9297	GCST90274776	1	179682087	0.031	3.45e-06	Macrophage colony-stimulating factor 1 levels	0.00167561	5.55e-08	1.01e-05	0.00174206	22.4035	40.9189	21.5476
rs142902162	T	C	T	C	0.3234	0.0494	0.0106	0.0128	Prostate cancer	13	75660663	0.0448	0.2697	GCST90274776	13	75660663	0.0723	7.71e-06	Macrophage colony-stimulating factor 1 levels	0.00154908	8.67e-06	7.52e-05	0.00219375	28.3528	40.9189	20.008
rs1605333	C	G	C	G	-0.0601	0.0057	0.6484	0.6516	Prostate cancer	12	58388232	0.0089	0.5213	GCST90274776	12	58388232	0.0124	1.25e-06	Macrophage colony-stimulating factor 1 levels	0.00177179	2.92e-06	8.85e-06	0.00164691	21.8329	40.9189	23.4912
rs17610659	T	C	T	C	0.1684	-0.0093	0.4821	0.4946	Prostate cancer	1	110503296	0.0085	0.2711	GCST90274776	1	110503296	0.0118	3.31e-46	Macrophage colony-stimulating factor 1 levels	0.0140579	8.54e-06	5.85e-40	0.0141611	205.183	40.9189	203.667
rs17638424	A	T	A	T	0.1034	-0.0011	0.9329	0.9368	Prostate cancer	18	3048453	0.0181	0.9516	GCST90274776	18	3048453	0.023	6.94e-06	Macrophage colony-stimulating factor 1 levels	0.00137179	2.63e-08	2.07e-05	0.00133853	19.7202	40.9189	20.2109
rs17734417	T	C	T	C	-0.1225	0.0324	0.9466	0.9469	Prostate cancer	14	58461604	0.0187	0.0835199	GCST90274776	14	58461604	0.0265	3.79e-06	Macrophage colony-stimulating factor 1 levels	0.00144948	2.14e-05	0.000112267	0.00151709	22.3669	40.9189	21.3688
rs2523992	T	G	T	G	-0.075	0.0261	0.8323	0.8454	Prostate cancer	6	30075103	0.011	0.0180601	GCST90274776	6	30075103	0.0152	8.05e-07	Macrophage colony-stimulating factor 1 levels	0.0016499	4.01e-05	7.47e-05	0.00157024	23.1691	40.9189	24.3464
rs28673875	A	T	A	T	-0.2096	0.0383	0.9801	0.9826	Prostate cancer	15	45690795	0.0334	0.2514	GCST90274776	15	45690795	0.046	5.2e-06	Macrophage colony-stimulating factor 1 levels	0.00145649	9.38e-06	6.54e-05	0.00171371	24.4347	40.9189	20.7619
rs34674345	T	C	T	C	-0.2243	-0.0222	0.9814	0.9879	Prostate cancer	15	63787216	0.0433	0.6077	GCST90274776	15	63787216	0.0503	8.22e-06	Macrophage colony-stimulating factor 1 levels	0.00139017	1.87e-06	4.29e-05	0.00183674	26.2843	40.9189	19.8849
rs3934571	T	C	T	C	-0.0802	-0.022	0.1143	0.1128	Prostate cancer	5	174229899	0.0131	0.092289	GCST90274776	5	174229899	0.018	8.37e-06	Macrophage colony-stimulating factor 1 levels	0.00134591	2.01e-05	0.000199437	0.0013023	19.2079	40.9189	19.852
rs552035687	T	C	T	C	0.1792	-0.02	0.045	0.0417	Prostate cancer	15	86425591	0.0268	0.4555	GCST90274776	15	86425591	0.0395	5.71e-06	Macrophage colony-stimulating factor 1 levels	0.00188605	3.97e-06	3.07e-05	0.00276008	30.146	40.9189	20.5817
rs7227917	A	G	A	G	-0.0872	-0.0199	0.8823	0.8889	Prostate cancer	18	45546185	0.014	0.1547	GCST90274776	18	45546185	0.0185	2.43e-06	Macrophage colony-stimulating factor 1 levels	0.00155298	1.44e-05	4.97e-05	0.00157927	22.5939	40.9189	22.2172
rs72783071	T	C	T	C	-0.199	0.0236	0.0231	0.0226	Prostate cancer	16	60437963	0.0296	0.4255	GCST90274776	16	60437963	0.0414	1.53e-06	Macrophage colony-stimulating factor 1 levels	0.00161934	4.53e-06	1.45e-05	0.0017873	25.5057	40.9189	23.105
rs74849049	T	G	T	G	-0.0914	0.0246	0.8992	0.8972	Prostate cancer	3	171430935	0.0139	0.0774604	GCST90274776	3	171430935	0.02	4.88e-06	Macrophage colony-stimulating factor 1 levels	0.00145998	2.23e-05	0.000136496	0.00151439	21.6644	40.9189	20.8849
rs75305583	T	C	T	C	-0.1493	-0.0258	0.0382	0.0347	Prostate cancer	4	183461339	0.0266	0.3336	GCST90274776	4	183461339	0.0329	5.68e-06	Macrophage colony-stimulating factor 1 levels	0.00143964	6.71e-06	5.65e-05	0.00163794	23.4347	40.9189	20.5934
rs7538029	A	C	A	C	0.0775	-0.0028	0.2211	0.2083	Prostate cancer	1	110474695	0.0101	0.7787	GCST90274776	1	110474695	0.0165	2.64e-06	Macrophage colony-stimulating factor 1 levels	0.00194288	5.48e-07	8.97e-06	0.00206873	23.4935	40.9189	22.0615
rs75869070	A	G	A	G	0.1151	0.0011	0.936	0.9428	Prostate cancer	14	78693608	0.0179	0.9491	GCST90274776	14	78693608	0.0239	1.47e-06	Macrophage colony-stimulating factor 1 levels	0.00157387	2.69e-08	5.08e-06	0.00158722	23.3899	40.9189	23.1929
rs76421506	A	G	A	G	0.0778	0.0222	0.853	0.8597	Prostate cancer	3	115295680	0.013	0.089	GCST90274776	3	115295680	0.0168	3.64e-06	Macrophage colony-stimulating factor 1 levels	0.00149913	2.08e-05	9.97e-05	0.00151794	21.7153	40.9189	21.4457
rs7825914	A	G	A	G	0.054	-0.0175	0.3028	0.3061	Prostate cancer	8	19590012	0.0087	0.0454904	GCST90274776	8	19590012	0.0122	9.59e-06	Macrophage colony-stimulating factor 1 levels	0.00132828	2.88e-05	0.00033135	0.00123121	18.158	40.9189	19.5915
rs78652121	C	G	C	G	-0.1189	0.0122	0.0697	0.0533	Prostate cancer	4	13713646	0.0192	0.5265	GCST90274776	4	13713646	0.026	4.81e-06	Macrophage colony-stimulating factor 1 levels	0.0016266	2.88e-06	2.77e-05	0.00183337	23.5763	40.9189	20.913
rs846654	T	C	T	C	-0.0519	0.0027	0.5786	0.5905	Prostate cancer	2	10646611	0.0083	0.7428	GCST90274776	2	10646611	0.0114	5.3e-06	Macrophage colony-stimulating factor 1 levels	0.0014075	7.55e-07	2.34e-05	0.00131352	19.3408	40.9189	20.7265
rs10479093	A	G	A	G	-0.0565	0.0077	0.587	0.5859	Prostate cancer	5	134508559	0.0082	0.3431	GCST90274777	5	134508559	0.0116	1.11e-06	Cystatin D levels	0.00161016	6.29e-06	1.41e-05	0.0015478	22.8034	40.9189	23.7236
rs11054089	T	G	T	G	0.1707	-0.0075	0.7422	0.7473	Prostate cancer	12	11116082	0.0091	0.4116	GCST90274777	12	11116082	0.0133	1.05e-37	Cystatin D levels	0.0113992	4.84e-06	6.29e-33	0.0111507	161.095	40.9189	164.727
rs112961631	T	C	T	C	0.5656	0.0389	0.0233	0.0155	Prostate cancer	20	23929099	0.0384	0.3112	GCST90274777	20	23929099	0.0476	1.46e-32	Cystatin D levels	0.0114909	7.32e-06	1.39e-28	0.0145602	179.461	40.9189	141.19
rs117068418	T	C	T	C	0.1632	-0.0109	0.961	0.9695	Prostate cancer	20	24176153	0.0267	0.682801	GCST90274777	20	24176153	0.0311	1.54e-07	Cystatin D levels	0.001868	1.19e-06	1.15e-06	0.00199645	29.4345	40.9189	27.5372
rs141192864	T	C	T	C	0.1016	-0.0205	0.0812	0.0718	Prostate cancer	12	31381343	0.016	0.2019	GCST90274777	12	31381343	0.0213	1.84e-06	Cystatin D levels	0.00154267	1.17e-05	3.45e-05	0.00154026	22.7169	40.9189	22.7525
rs1509659	A	G	A	G	-0.0671	0.0134	0.6342	0.6205	Prostate cancer	11	34865133	0.0085	0.1147	GCST90274777	11	34865133	0.0118	1.3e-08	Cystatin D levels	0.00219041	1.77e-05	8.6e-07	0.00208903	30.8359	40.9189	32.3356
rs35106244	T	C	T	C	0.0831	0.015	0.4156	0.4215	Prostate cancer	19	49203829	0.0086	0.0807904	GCST90274777	19	49203829	0.0123	1.42e-11	Cystatin D levels	0.0031849	2.17e-05	3.58e-09	0.00335442	48.0826	40.9189	45.6449
rs470841	T	C	T	C	0.0568	-0.0032	0.6369	0.6345	Prostate cancer	18	24286681	0.0084	0.704001	GCST90274777	18	24286681	0.0119	1.81e-06	Cystatin D levels	0.00154387	1.03e-06	9.79e-06	0.00149219	22.0188	40.9189	22.7826
rs4950836	A	G	A	G	0.0585	0.0117	0.6022	0.5841	Prostate cancer	1	202192624	0.0081	0.1514	GCST90274777	1	202192624	0.012	1.09e-06	Cystatin D levels	0.0016608	1.49e-05	2.63e-05	0.00163963	23.4623	40.9189	23.7656
rs60586299	T	C	T	C	-0.0654	-0.0014	0.3077	0.3028	Prostate cancer	18	3479423	0.0094	0.8825	GCST90274777	18	3479423	0.0134	1.06e-06	Cystatin D levels	0.00166461	1.58e-07	4.17e-06	0.00182225	26.0801	40.9189	23.8202
rs6106715	C	G	C	G	-0.3784	-0.0113	0.6593	0.6658	Prostate cancer	20	23770266	0.0089	0.2068	GCST90274777	20	23770266	0.0118	1.24e-225	Cystatin D levels	0.0652819	1.15e-05	9.62e-195	0.0643261	1012.25	40.9189	1028.34
rs72748935	T	C	T	C	0.0772	0.0121	0.4618	0.4362	Prostate cancer	15	63639416	0.0082	0.1415	GCST90274777	15	63639416	0.0114	1.27e-11	Cystatin D levels	0.00310575	1.55e-05	2.18e-09	0.00296253	43.738	40.9189	45.859
rs7275493	T	C	T	C	-0.0572	-0.0009	0.6243	0.6436	Prostate cancer	21	18049996	0.0091	0.9229	GCST90274777	21	18049996	0.0119	1.53e-06	Cystatin D levels	0.00156661	6.97e-08	5.6e-06	0.00153482	22.6349	40.9189	23.1046
rs72980022	A	G	A	G	0.0607	0.0248	0.2813	0.2816	Prostate cancer	2	233853187	0.0091	0.006574	GCST90274777	2	233853187	0.0126	1.45e-06	Cystatin D levels	0.00157425	5.3e-05	0.00018273	0.00148979	21.9609	40.9189	23.2079
rs77415137	A	G	A	G	-0.2494	0.0015	0.9789	0.9805	Prostate cancer	20	24084648	0.0321	0.962	GCST90274777	20	24084648	0.0438	1.24e-08	Cystatin D levels	0.00219568	1.56e-08	6.66e-08	0.00256947	37.9561	40.9189	32.4224
rs7943316	A	T	A	T	-0.0639	-0.0235	0.345	0.3387	Prostate cancer	11	34460472	0.0086	0.00598798	GCST90274777	11	34460472	0.012	1.01e-07	Cystatin D levels	0.00192146	5.32e-05	2.43e-05	0.00184541	27.2312	40.9189	28.3556
rs10778675	A	C	A	C	0.0792	-0.0023	0.1687	0.1723	Prostate cancer	12	79905558	0.0115	0.8383	GCST90274778	12	79905558	0.0158	5.37e-07	Fractalkine levels	0.00175489	2.85e-07	2.44e-06	0.00175935	25.1908	40.9189	25.1267
rs111472651	C	G	C	G	-0.1191	0.0013	0.9355	0.9454	Prostate cancer	2	44117788	0.0181	0.944	GCST90274778	2	44117788	0.0248	1.57e-06	Fractalkine levels	0.00156371	3.68e-08	5.49e-06	0.00171182	25.2514	40.9189	23.0632
rs114359340	A	G	A	G	-0.1881	0.0088	0.9747	0.9733	Prostate cancer	1	6532317	0.0273	0.7471	GCST90274778	1	6532317	0.0405	3.41e-06	Fractalkine levels	0.00157791	7.41e-07	1.45e-05	0.00174501	23.8593	40.9189	21.5709
rs117698194	A	G	A	G	-0.1996	0.0263	0.0224	0.0203	Prostate cancer	15	85657494	0.0316	0.4042	GCST90274778	15	85657494	0.0432	3.83e-06	Fractalkine levels	0.00153821	4.94e-06	3.23e-05	0.00174486	24.2208	40.9189	21.3478
rs12331618	A	G	A	G	-0.0582	-0.0091	0.4914	0.4843	Prostate cancer	4	187139939	0.0081	0.2638	GCST90274778	4	187139939	0.0114	3.3e-07	Fractalkine levels	0.00176666	9e-06	6.52e-06	0.00169312	24.9769	40.9189	26.0637
rs13167439	T	C	T	C	-0.0903	-0.0095	0.89	0.8983	Prostate cancer	5	120396066	0.0142	0.5069	GCST90274778	5	120396066	0.0193	2.89e-06	Fractalkine levels	0.00152923	3.19e-06	2.11e-05	0.00159657	22.8563	40.9189	21.8908
rs16904321	A	G	A	G	-0.0867	0.0087	0.8632	0.868	Prostate cancer	8	131635787	0.015	0.5592	GCST90274778	8	131635787	0.0193	7.05e-06	Fractalkine levels	0.0014099	2.4e-06	4.1e-05	0.00177527	25.4191	40.9189	20.1801
rs1976172	C	G	C	G	-0.0569	0.006	0.3525	0.3553	Prostate cancer	3	1260482	0.0083	0.47	GCST90274778	3	1260482	0.012	2.12e-06	Fractalkine levels	0.00152404	3.73e-06	1.81e-05	0.00147793	21.8021	40.9189	22.4834
rs2731674	T	G	T	G	-0.0681	0.0027	0.274	0.2494	Prostate cancer	5	176839890	0.0094	0.771999	GCST90274778	5	176839890	0.0128	1.04e-07	Fractalkine levels	0.00191691	5.88e-07	6.67e-07	0.00184506	27.2428	40.9189	28.3057
rs35026817	T	G	T	G	0.0633	0.0073	0.3327	0.325	Prostate cancer	3	70136592	0.0088	0.4025	GCST90274778	3	70136592	0.0122	2.12e-07	Fractalkine levels	0.00182329	4.91e-06	2.89e-06	0.00177914	26.2678	40.9189	26.9208
rs36067349	T	C	T	C	0.0666	0.0004	0.8038	0.7985	Prostate cancer	15	23001299	0.0109	0.9721	GCST90274778	15	23001299	0.015	9e-06	Fractalkine levels	0.00137744	9.6e-09	2.47e-05	0.00139902	20.0229	40.9189	19.7136
rs3732378	A	G	A	G	0.0941	-0.0055	0.1671	0.1691	Prostate cancer	3	39307162	0.0109	0.613999	GCST90274778	3	39307162	0.0154	9.94e-10	Fractalkine levels	0.00252697	1.82e-06	1.56e-08	0.00246478	36.4157	40.9189	37.3369
rs4047522	T	C	T	C	-0.0639	-0.0091	0.4952	0.4814	Prostate cancer	1	161608256	0.0096	0.3414	GCST90274778	1	161608256	0.0142	6.8e-06	Fractalkine levels	0.0017181	6.41e-06	4.97e-05	0.00204142	24.0684	40.9189	20.25
rs543554558	C	G	C	G	-0.2883	0.1373	0.9837	0.9919	Prostate cancer	19	19437687	0.0592	0.0203601	GCST90274778	19	19437687	0.0633	5.25e-06	Fractalkine levels	0.00186714	3.84e-05	0.000173232	0.00266544	29.6361	40.9189	20.7435
rs55896747	T	C	T	C	0.1129	-0.0141	0.9372	0.9451	Prostate cancer	16	57508595	0.0178	0.4276	GCST90274778	16	57508595	0.0244	3.71e-06	Fractalkine levels	0.00145116	4.47e-06	3.24e-05	0.00150041	22.1372	40.9189	21.4096
rs56397903	A	G	A	G	0.1968	0.0134	0.9744	0.9822	Prostate cancer	8	26741279	0.0336	0.6912	GCST90274778	8	26741279	0.0424	3.46e-06	Fractalkine levels	0.00145934	1.13e-06	1.78e-05	0.00193222	28.5381	40.9189	21.5436
rs56675723	T	C	T	C	0.0666	0.0045	0.7791	0.7759	Prostate cancer	11	120941125	0.0095	0.636999	GCST90274778	11	120941125	0.0149	7.83e-06	Fractalkine levels	0.00160733	1.6e-06	3.36e-05	0.00152675	18.9759	40.9189	19.9791
rs571946532	A	C	A	C	-0.2404	-0.0198	0.981	0.9781	Prostate cancer	9	88885541	0.0318	0.533801	GCST90274778	9	88885541	0.0512	2.66e-06	Fractalkine levels	0.0018702	2.76e-06	1.46e-05	0.00215438	25.4031	40.9189	22.046
rs635634	T	C	T	C	-0.1145	0.0057	0.1884	0.2011	Prostate cancer	9	136155000	0.0102	0.5797	GCST90274778	9	136155000	0.0166	5.29e-12	Fractalkine levels	0.00401913	2.23e-06	1.02e-10	0.00400926	47.4594	40.9189	47.5768
rs6937696	T	C	T	C	-0.0811	0.019	0.651	0.6626	Prostate cancer	6	32418018	0.0084	0.0239999	GCST90274778	6	32418018	0.012	1.4e-11	Fractalkine levels	0.00308914	3.65e-05	1.02e-08	0.00298867	44.1851	40.9189	45.6751
rs712137	A	C	A	C	0.0563	-0.0092	0.6601	0.6622	Prostate cancer	12	41381284	0.0088	0.2927	GCST90274778	12	41381284	0.012	2.71e-06	Fractalkine levels	0.00149161	7.79e-06	3.48e-05	0.00142235	20.9882	40.9189	22.0117
rs71451021	A	C	A	C	-0.165	0.0101	0.9728	0.9744	Prostate cancer	2	19059082	0.0254	0.6898	GCST90274778	2	19059082	0.0362	5.16e-06	Fractalkine levels	0.00140767	1.13e-06	2.53e-05	0.00144076	21.2645	40.9189	20.7755
rs72704449	T	C	T	C	-0.1358	0.0154	0.9547	0.953	Prostate cancer	1	179473273	0.0205	0.454	GCST90274778	1	179473273	0.0298	5.19e-06	Fractalkine levels	0.00145082	4.02e-06	3.93e-05	0.00159512	22.8355	40.9189	20.7667
rs73007244	T	C	T	C	0.0813	0.0222	0.1321	0.1224	Prostate cancer	18	59374764	0.0123	0.0709104	GCST90274778	18	59374764	0.0179	5.57e-06	Fractalkine levels	0.0014412	2.32e-05	0.000158899	0.0015156	21.6953	40.9189	20.6289
rs73137770	C	G	C	G	0.2442	-0.0021	0.9812	0.9877	Prostate cancer	20	52569781	0.0428	0.9615	GCST90274778	20	52569781	0.0529	3.91e-06	Fractalkine levels	0.00154114	1.72e-08	1.14e-05	0.00220007	30.4412	40.9189	21.3098
rs77819349	C	G	C	G	0.1196	-0.0244	0.9371	0.9357	Prostate cancer	9	81886673	0.0193	0.2059	GCST90274778	9	81886673	0.0263	5.43e-06	Fractalkine levels	0.00144477	1.14e-05	7.93e-05	0.00168628	24.1427	40.9189	20.68
rs77915710	A	G	A	G	-0.1436	0.0169	0.0402	0.0382	Prostate cancer	1	172099857	0.0213	0.4266	GCST90274778	1	172099857	0.0304	2.32e-06	Fractalkine levels	0.0015115	4.49e-06	2.16e-05	0.00159128	23.4928	40.9189	22.3132
rs78751841	A	G	A	G	-0.1935	-0.0119	0.9764	0.9787	Prostate cancer	16	57183274	0.0338	0.724599	GCST90274778	16	57183274	0.0433	7.87e-06	Fractalkine levels	0.00135475	8.84e-07	3.45e-05	0.00172557	25.446	40.9189	19.9704
rs8052631	A	G	A	G	-0.1511	0.0167	0.9463	0.9509	Prostate cancer	16	57167230	0.0198	0.4007	GCST90274778	16	57167230	0.027	2.19e-08	Fractalkine levels	0.00218639	5.07e-06	3.92e-07	0.0023204	33.2426	40.9189	31.3185
rs9981489	T	C	T	C	0.1127	-0.0045	0.0652	0.0651	Prostate cancer	21	25498266	0.0179	0.8012	GCST90274778	21	25498266	0.0254	9.12e-06	Fractalkine levels	0.0013755	4.51e-07	3.33e-05	0.00154826	22.1636	40.9189	19.687
rs10508556	T	C	T	C	0.0518	0.0061	0.4633	0.4565	Prostate cancer	10	18285342	0.0081	0.4519	GCST90274779	10	18285342	0.0116	7.99e-06	C-X-C motif chemokine 1 levels	0.00135165	4.04e-06	5.95e-05	0.00133439	19.6859	40.9189	19.9408
rs10734292	A	G	A	G	0.123	0.0103	0.067	0.0729	Prostate cancer	11	20486401	0.0166	0.5349	GCST90274779	11	20486401	0.0267	4.09e-06	C-X-C motif chemokine 1 levels	0.00179921	2.75e-06	2.13e-05	0.00189146	22.3122	40.9189	21.2221
rs118090102	T	G	T	G	-0.2573	-0.0254	0.0166	0.0119	Prostate cancer	12	28799395	0.0436	0.5596	GCST90274779	12	28799395	0.0582	9.83e-06	C-X-C motif chemokine 1 levels	0.00150896	2.42e-06	4.91e-05	0.00216146	28.0148	40.9189	19.5449
rs11880837	A	G	A	G	0.0583	0.0137	0.3161	0.318	Prostate cancer	19	14808453	0.009	0.1256	GCST90274779	19	14808453	0.0127	4.42e-06	C-X-C motif chemokine 1 levels	0.00147292	1.65e-05	9.26e-05	0.00146955	21.0249	40.9189	21.0732
rs12770839	A	C	A	C	0.0648	-0.0014	0.321	0.3133	Prostate cancer	10	65297720	0.0089	0.8723	GCST90274779	10	65297720	0.0126	2.71e-07	C-X-C motif chemokine 1 levels	0.00179334	1.76e-07	1.28e-06	0.00183044	26.9971	40.9189	26.449
rs1366946	T	C	T	C	-0.3134	0.0034	0.7638	0.7733	Prostate cancer	4	74738469	0.0097	0.7286	GCST90274779	4	74738469	0.0134	5.65e-121	C-X-C motif chemokine 1 levels	0.0358102	8.76e-07	2.59e-107	0.0354395	541.13	40.9189	547.001
rs141276323	C	G	C	G	0.1982	0.028	0.0196	0.0199	Prostate cancer	12	90180208	0.0297	0.347	GCST90274779	12	90180208	0.0444	8.05e-06	C-X-C motif chemokine 1 levels	0.00135135	6.34e-06	7.66e-05	0.00150972	22.2658	40.9189	19.927
rs144620567	T	C	T	C	0.1891	-0.0403	0.9761	0.978	Prostate cancer	7	115483444	0.0298	0.1769	GCST90274779	7	115483444	0.0426	9.04e-06	C-X-C motif chemokine 1 levels	0.0013361	1.3e-05	0.0001419	0.00166842	24.6135	40.9189	19.7044
rs144747179	T	C	T	C	0.2626	-0.0617	0.0157	0.0116	Prostate cancer	5	159394723	0.0442	0.1626	GCST90274779	5	159394723	0.0582	6.42e-06	C-X-C motif chemokine 1 levels	0.00161455	1.39e-05	8.84e-05	0.00213131	26.8884	40.9189	20.3584
rs146204850	T	C	T	C	0.2706	0.0421	0.0138	0.0107	Prostate cancer	10	13896867	0.0413	0.3077	GCST90274779	10	13896867	0.0601	6.72e-06	C-X-C motif chemokine 1 levels	0.00146697	7.41e-06	6.61e-05	0.0019931	27.5577	40.9189	20.2725
rs150441545	A	C	A	C	-0.0719	0.0163	0.8268	0.8161	Prostate cancer	14	35091527	0.0106	0.1245	GCST90274779	14	35091527	0.0158	5.35e-06	C-X-C motif chemokine 1 levels	0.00144745	1.69e-05	0.000110415	0.00148059	21.1831	40.9189	20.7083
rs188111670	A	G	A	G	0.0976	-0.0033	0.3429	0.3976	Prostate cancer	22	16564036	0.012	0.7835	GCST90274779	22	16564036	0.0208	2.7e-06	C-X-C motif chemokine 1 levels	0.00283624	5.39e-07	6.71e-06	0.00429268	33.3729	40.9189	22.0178
rs2122155	A	G	A	G	-0.0538	-0.0029	0.5637	0.5686	Prostate cancer	4	59689961	0.0081	0.723701	GCST90274779	4	59689961	0.0117	4.26e-06	C-X-C motif chemokine 1 levels	0.00143486	9.14e-07	2.02e-05	0.00142373	20.9801	40.9189	21.1443
rs2280441	A	G	A	G	-0.1443	0.0306	0.0405	0.0508	Prostate cancer	15	81240669	0.0224	0.1709	GCST90274779	15	81240669	0.0312	3.75e-06	C-X-C motif chemokine 1 levels	0.00144978	1.33e-05	6.97e-05	0.00161831	23.8813	40.9189	21.3906
rs2835916	C	G	C	G	-0.0564	0.0019	0.3876	0.3924	Prostate cancer	21	39102421	0.0083	0.8213	GCST90274779	21	39102421	0.012	2.6e-06	C-X-C motif chemokine 1 levels	0.00149711	3.74e-07	1.09e-05	0.00151011	22.282	40.9189	22.09
rs374636704	T	G	T	G	0.3935	-0.0926	0.009	0.0089	Prostate cancer	5	177372616	0.0534	0.0829106	GCST90274779	5	177372616	0.0869	5.95e-06	C-X-C motif chemokine 1 levels	0.00229627	2.14e-05	7.33e-05	0.00276208	24.6755	40.9189	20.5045
rs4474574	T	C	T	C	-0.365	0.0071	0.0146	0.0075	Prostate cancer	13	37854253	0.0506	0.8879	GCST90274779	13	37854253	0.0779	2.79e-06	C-X-C motif chemokine 1 levels	0.00229284	1.4e-07	6.92e-06	0.00383337	36.7611	40.9189	21.9539
rs62311721	T	C	T	C	-0.186	0.0276	0.9588	0.9689	Prostate cancer	4	84005961	0.0303	0.3628	GCST90274779	4	84005961	0.0407	4.88e-06	C-X-C motif chemokine 1 levels	0.0014598	5.92e-06	4.59e-05	0.00273326	39.1544	40.9189	20.8851
rs67797811	C	G	C	G	0.0822	-0.001	0.1691	0.1607	Prostate cancer	9	4396102	0.0133	0.9387	GCST90274779	9	4396102	0.0179	4.39e-06	C-X-C motif chemokine 1 levels	0.00147396	4.03e-08	1.36e-05	0.00189874	27.177	40.9189	21.0881
rs6807587	A	G	A	G	0.0577	-0.0075	0.2947	0.2992	Prostate cancer	3	45270029	0.0089	0.4014	GCST90274779	3	45270029	0.0128	6.55e-06	C-X-C motif chemokine 1 levels	0.00137753	5.06e-06	5.64e-05	0.001384	20.4159	40.9189	20.3204
rs75883619	T	C	T	C	-0.2241	0.0358	0.9769	0.9805	Prostate cancer	1	191712620	0.0321	0.2643	GCST90274779	1	191712620	0.0502	8.04e-06	C-X-C motif chemokine 1 levels	0.00135073	8.87e-06	9.55e-05	0.00226661	33.472	40.9189	19.9286
rs7700661	A	G	A	G	0.0556	0.0002	0.3196	0.3227	Prostate cancer	5	122405522	0.0086	0.9839	GCST90274779	5	122405522	0.0124	7.33e-06	C-X-C motif chemokine 1 levels	0.00136425	3.86e-09	2.07e-05	0.00134447	19.8132	40.9189	20.1051
rs8136931	A	G	A	G	-0.1533	0.0361	0.0337	0.025	Prostate cancer	22	33031339	0.0264	0.1706	GCST90274779	22	33031339	0.0344	8.33e-06	C-X-C motif chemokine 1 levels	0.00134605	1.33e-05	0.000135307	0.00153058	22.5861	40.9189	19.8595
rs937341	T	G	T	G	0.066	-0.0119	0.7719	0.7715	Prostate cancer	12	125093430	0.0103	0.2496	GCST90274779	12	125093430	0.0146	6.17e-06	C-X-C motif chemokine 1 levels	0.0014284	9.52e-06	7.68e-05	0.00153393	21.9473	40.9189	20.4354
rs1077965	A	G	A	G	-0.0546	0.0104	0.5648	0.5668	Prostate cancer	15	80065337	0.0082	0.2073	GCST90274780	15	80065337	0.0118	3.71e-06	C-X-C motif chemokine 10 levels	0.0014515	1.15e-05	6.08e-05	0.00146554	21.6177	40.9189	21.4102
rs112202639	A	G	A	G	-0.1609	0.0612	0.9671	0.9691	Prostate cancer	1	44566391	0.0239	0.0106001	GCST90274780	1	44566391	0.0336	1.68e-06	C-X-C motif chemokine 10 levels	0.00155311	4.67e-05	0.000167047	0.00164744	24.3266	40.9189	22.9316
rs115140093	T	C	T	C	-0.5186	0.0234	0.9732	0.9791	Prostate cancer	4	76910673	0.0332	0.4809	GCST90274780	4	76910673	0.042	5.02e-35	C-X-C motif chemokine 10 levels	0.0102363	3.54e-06	1.2e-30	0.0140292	209.761	40.9189	152.464
rs11645285	C	G	C	G	-0.1096	0.0017	0.9073	0.9033	Prostate cancer	16	5063233	0.014	0.903	GCST90274780	16	5063233	0.0242	5.93e-06	C-X-C motif chemokine 10 levels	0.001805	1.05e-07	1.55e-05	0.00202061	22.9661	40.9189	20.5112
rs117298099	A	G	A	G	0.1456	0.0219	0.0363	0.0291	Prostate cancer	6	152726625	0.0248	0.3763	GCST90274780	6	152726625	0.0325	7.46e-06	C-X-C motif chemokine 10 levels	0.00136134	5.56e-06	6.65e-05	0.00148321	21.8697	40.9189	20.0704
rs11825923	T	C	T	C	0.1921	-0.0498	0.0237	0.0185	Prostate cancer	11	116006514	0.031	0.1081	GCST90274780	11	116006514	0.0421	5.04e-06	C-X-C motif chemokine 10 levels	0.00145947	1.84e-05	0.000114074	0.00170772	24.3681	40.9189	20.8205
rs12155428	T	C	T	C	-0.1765	-0.0912	0.0284	0.0286	Prostate cancer	7	3425301	0.026	0.000460204	GCST90274780	7	3425301	0.0375	2.52e-06	C-X-C motif chemokine 10 levels	0.00150156	8.77e-05	0.000686872	0.00171919	25.3691	40.9189	22.1527
rs12174864	A	G	A	G	-0.0582	0.0035	0.6254	0.6208	Prostate cancer	6	88557407	0.0084	0.6811	GCST90274780	6	88557407	0.0121	1.51e-06	C-X-C motif chemokine 10 levels	0.00161603	1.24e-06	8.43e-06	0.00158709	22.7203	40.9189	23.1353
rs12629593	T	G	T	G	-0.0879	-0.0032	0.1209	0.1133	Prostate cancer	3	54104178	0.0139	0.8202	GCST90274780	3	54104178	0.0182	1.37e-06	C-X-C motif chemokine 10 levels	0.00157976	3.78e-07	6.13e-06	0.00164237	24.2517	40.9189	23.3257
rs150519056	T	C	T	C	-0.1841	-0.0192	0.9688	0.9699	Prostate cancer	22	50774821	0.0261	0.4617	GCST90274780	22	50774821	0.0376	9.77e-07	C-X-C motif chemokine 10 levels	0.00175207	3.86e-06	8.46e-06	0.00204893	28.0437	40.9189	23.9735
rs1563171	A	G	A	G	0.0592	0.0001	0.7042	0.7029	Prostate cancer	2	3891773	0.0087	0.994	GCST90274780	2	3891773	0.0127	3.14e-06	C-X-C motif chemokine 10 levels	0.00147217	9.42e-10	9.45e-06	0.00146005	21.5497	40.9189	21.7288
rs3184504	T	C	T	C	0.1138	-0.0187	0.4756	0.4811	Prostate cancer	12	111884608	0.0082	0.0218102	GCST90274780	12	111884608	0.0131	3.72e-18	C-X-C motif chemokine 10 levels	0.00635946	3.71e-05	1.37e-14	0.0064598	76.6627	40.9189	75.4644
rs3846056	A	G	A	G	-0.0559	0.0056	0.3248	0.3195	Prostate cancer	3	134227292	0.0085	0.5138	GCST90274780	3	134227292	0.0124	6.54e-06	C-X-C motif chemokine 10 levels	0.00141974	3.09e-06	4.26e-05	0.00137057	19.6179	40.9189	20.3226
rs4367871	T	C	T	C	-0.0567	0.0007	0.5587	0.5606	Prostate cancer	10	1845059	0.0088	0.9396	GCST90274780	10	1845059	0.0119	1.89e-06	C-X-C motif chemokine 10 levels	0.00158573	4.51e-08	6.38e-06	0.00158529	22.6961	40.9189	22.7024
rs4804148	T	C	T	C	-0.0629	-0.014	0.7227	0.7336	Prostate cancer	19	11270867	0.0096	0.1439	GCST90274780	19	11270867	0.013	1.31e-06	C-X-C motif chemokine 10 levels	0.00158551	1.52e-05	3.3e-05	0.00158577	23.4145	40.9189	23.4107
rs55732300	A	G	A	G	0.1175	-0.0202	0.929	0.9355	Prostate cancer	11	73731422	0.0178	0.2567	GCST90274780	11	73731422	0.025	2.6e-06	C-X-C motif chemokine 10 levels	0.00149762	9.18e-06	3.79e-05	0.00182129	26.8729	40.9189	22.09
rs59465157	A	G	A	G	0.1295	0.0296	0.0442	0.0424	Prostate cancer	5	115740808	0.02	0.1392	GCST90274780	5	115740808	0.0287	6.42e-06	C-X-C motif chemokine 10 levels	0.00137918	1.56e-05	0.000125715	0.00141696	20.9185	40.9189	20.3599
rs61811733	C	G	C	G	-0.1436	0.0551	0.9616	0.968	Prostate cancer	1	181143447	0.031	0.0756101	GCST90274780	1	181143447	0.0324	9.33e-06	C-X-C motif chemokine 10 levels	0.00133125	2.25e-05	0.000245386	0.00152288	22.4753	40.9189	19.6435
rs62208309	T	C	T	C	-0.1371	0.0171	0.0542	0.0454	Prostate cancer	20	51942555	0.0248	0.49	GCST90274780	20	51942555	0.0309	9.13e-06	C-X-C motif chemokine 10 levels	0.00137533	3.39e-06	5.92e-05	0.0019271	27.5991	40.9189	19.686
rs71534595	T	C	T	C	-0.2991	0.0258	0.9813	0.9911	Prostate cancer	6	32516855	0.0485	0.5947	GCST90274780	6	32516855	0.0606	7.99e-07	C-X-C motif chemokine 10 levels	0.00207477	2.02e-06	4.39e-06	0.00328327	38.5968	40.9189	24.3606
rs72651343	T	C	T	C	-0.6096	-0.0106	0.9892	0.9901	Prostate cancer	4	76808216	0.0423	0.8032	GCST90274780	4	76808216	0.0619	6.98e-23	C-X-C motif chemokine 10 levels	0.00675766	4.48e-07	1.46e-20	0.00794013	114.093	40.9189	96.9859
rs72682331	A	G	A	G	0.1089	-0.0115	0.0979	0.0825	Prostate cancer	4	112904535	0.0153	0.4535	GCST90274780	4	112904535	0.0209	1.88e-07	C-X-C motif chemokine 10 levels	0.00183988	4.03e-06	2.32e-06	0.00209471	30.9177	40.9189	27.1496
rs741344	A	G	A	G	-0.06	0.0085	0.7036	0.7017	Prostate cancer	12	68597086	0.0089	0.3392	GCST90274780	12	68597086	0.013	3.92e-06	C-X-C motif chemokine 10 levels	0.00148804	6.5e-06	4.04e-05	0.00150154	21.4953	40.9189	21.3018
rs76484468	T	C	T	C	-0.2168	0.0489	0.9792	0.9864	Prostate cancer	2	227559824	0.0456	0.2843	GCST90274780	2	227559824	0.0482	6.86e-06	C-X-C motif chemokine 10 levels	0.00137048	8.2e-06	7.92e-05	0.00191462	28.2795	40.9189	20.2313
rs820963	C	G	C	G	-0.0539	-0.0032	0.3617	0.383	Prostate cancer	2	57744868	0.0084	0.702901	GCST90274780	2	57744868	0.0122	9.96e-06	C-X-C motif chemokine 10 levels	0.00132337	1.03e-06	4.42e-05	0.00134147	19.7864	40.9189	19.519
rs10733789	T	C	T	C	-0.0815	-0.0014	0.6875	0.686	Prostate cancer	10	64948684	0.0089	0.8711	GCST90274781	10	64948684	0.0127	1.39e-10	C-X-C motif chemokine 11 levels	0.0028746	1.76e-07	1.34e-09	0.00285409	40.8874	40.9189	41.182
rs10876335	C	G	C	G	0.0607	-0.0256	0.3069	0.2931	Prostate cancer	12	53150540	0.0087	0.00341499	GCST90274781	12	53150540	0.0133	5.02e-06	C-X-C motif chemokine 11 levels	0.00157097	6.17e-05	0.000470081	0.00156747	20.7828	40.9189	20.8293
rs10898158	A	G	A	G	0.0609	0.003	0.6028	0.6024	Prostate cancer	11	83554112	0.0084	0.7195	GCST90274781	11	83554112	0.0121	4.83e-07	C-X-C motif chemokine 11 levels	0.00177004	9.09e-07	2.8e-06	0.00177602	25.4173	40.9189	25.3317
rs111787182	A	C	A	C	-0.1445	0.0175	0.951	0.9514	Prostate cancer	7	157911633	0.0219	0.4245	GCST90274781	7	157911633	0.0314	4.19e-06	C-X-C motif chemokine 11 levels	0.00159913	4.55e-06	3.14e-05	0.001946	25.7801	40.9189	21.1776
rs112884138	T	C	T	C	-0.0976	-0.0055	0.0892	0.0914	Prostate cancer	4	134362360	0.0152	0.7165	GCST90274781	4	134362360	0.0209	3.01e-06	C-X-C motif chemokine 11 levels	0.0014787	9.34e-07	1.49e-05	0.00154781	22.8284	40.9189	21.8076
rs114013730	A	G	A	G	0.3893	0.0004	0.9892	0.9902	Prostate cancer	2	112444622	0.0551	0.9944	GCST90274781	2	112444622	0.0853	5.02e-06	C-X-C motif chemokine 11 levels	0.00173868	3.76e-10	1.2e-05	0.00323822	38.8517	40.9189	20.8291
rs115344667	T	C	T	C	-0.1344	0.0347	0.9568	0.9556	Prostate cancer	2	78400313	0.0216	0.107	GCST90274781	2	78400313	0.0302	8.57e-06	C-X-C motif chemokine 11 levels	0.0013424	1.84e-05	0.000186138	0.00149325	22.0345	40.9189	19.8054
rs116470923	T	C	T	C	-0.1975	-0.0269	0.0216	0.0196	Prostate cancer	4	77374393	0.0305	0.3778	GCST90274781	4	77374393	0.0427	3.74e-06	C-X-C motif chemokine 11 levels	0.00144987	5.55e-06	3.68e-05	0.00164867	24.3317	40.9189	21.3933
rs11754031	T	C	T	C	0.0542	-0.0054	0.357	0.3573	Prostate cancer	6	88567494	0.0085	0.527	GCST90274781	6	88567494	0.0122	8.89e-06	C-X-C motif chemokine 11 levels	0.00137965	2.88e-06	5.39e-05	0.00134868	19.2932	40.9189	19.7369
rs12433317	A	G	A	G	0.0571	0.0096	0.4282	0.4257	Prostate cancer	14	50775476	0.0087	0.2674	GCST90274781	14	50775476	0.012	1.95e-06	C-X-C motif chemokine 11 levels	0.00158238	8.68e-06	2.71e-05	0.00159659	22.8453	40.9189	22.6417
rs12998222	T	C	T	C	0.2339	-0.0282	0.9855	0.987	Prostate cancer	2	153497193	0.0384	0.463	GCST90274781	2	153497193	0.0528	9.43e-06	C-X-C motif chemokine 11 levels	0.00142013	3.85e-06	6.18e-05	0.00156356	21.6094	40.9189	19.6242
rs144908342	A	G	A	G	-0.1763	0.0367	0.0292	0.0231	Prostate cancer	17	71105507	0.0361	0.3094	GCST90274781	17	71105507	0.0394	7.65e-06	C-X-C motif chemokine 11 levels	0.0013579	7.37e-06	8.07e-05	0.00176217	25.9937	40.9189	20.0222
rs148828177	T	C	T	C	-0.1509	0.0256	0.0385	0.0313	Prostate cancer	2	240244812	0.0251	0.3062	GCST90274781	2	240244812	0.034	9.07e-06	C-X-C motif chemokine 11 levels	0.00133548	7.42e-06	9.36e-05	0.00168585	24.8745	40.9189	19.6979
rs17466177	T	C	T	C	-0.1822	0.0305	0.9741	0.976	Prostate cancer	1	222852472	0.0307	0.3194	GCST90274781	1	222852472	0.0409	8.4e-06	C-X-C motif chemokine 11 levels	0.00134626	7.04e-06	8.47e-05	0.00167506	24.6999	40.9189	19.845
rs17824652	T	C	T	C	0.1168	0.0111	0.9406	0.9333	Prostate cancer	20	41987913	0.0172	0.5184	GCST90274781	20	41987913	0.0258	5.98e-06	C-X-C motif chemokine 11 levels	0.00143256	2.97e-06	3.86e-05	0.00152443	21.8112	40.9189	20.4949
rs185516256	T	C	T	C	0.1566	-0.0085	0.9575	0.9762	Prostate cancer	1	51541675	0.0279	0.7612	GCST90274781	1	51541675	0.0349	7.22e-06	C-X-C motif chemokine 11 levels	0.00140738	6.62e-07	2.9e-05	0.00199591	28.5706	40.9189	20.1341
rs2013836	A	C	A	C	0.1383	-0.062	0.0402	0.0328	Prostate cancer	1	181142796	0.0302	0.0397704	GCST90274781	1	181142796	0.0309	7.62e-06	C-X-C motif chemokine 11 levels	0.00135811	3.01e-05	0.000290378	0.00147598	21.7734	40.9189	20.0321
rs2245786	A	G	A	G	-0.0599	-0.0104	0.6525	0.6481	Prostate cancer	20	4795382	0.0099	0.2917	GCST90274781	20	4795382	0.0131	4.82e-06	C-X-C motif chemokine 11 levels	0.00141846	7.87e-06	5.7e-05	0.00162712	23.9886	40.9189	20.9079
rs2678131	T	C	T	C	-0.1497	-0.0294	0.0348	0.0379	Prostate cancer	12	43091649	0.0231	0.2043	GCST90274781	12	43091649	0.033	5.72e-06	C-X-C motif chemokine 11 levels	0.00139624	1.15e-05	8.77e-05	0.00150546	22.1908	40.9189	20.5786
rs2894233	A	G	A	G	-0.2236	-0.059	0.9724	0.979	Prostate cancer	6	32011678	0.0301	0.0499103	GCST90274781	6	32011678	0.047	1.96e-06	C-X-C motif chemokine 11 levels	0.00189596	2.74e-05	5.89e-05	0.00268366	32.0619	40.9189	22.6333
rs3184504	T	C	T	C	0.1236	-0.0187	0.4764	0.4811	Prostate cancer	12	111884608	0.0082	0.0218102	GCST90274781	12	111884608	0.0132	7.7e-21	C-X-C motif chemokine 11 levels	0.00738607	3.71e-05	6.99e-17	0.00762146	90.4934	40.9189	87.6777
rs371789589	A	G	A	G	0.154	0.0245	0.0398	0.0399	Prostate cancer	13	53082648	0.0211	0.2449	GCST90274781	13	53082648	0.034	5.91e-06	C-X-C motif chemokine 11 levels	0.00168057	9.61e-06	5.95e-05	0.00181266	22.131	40.9189	20.5156
rs374784992	A	G	A	G	0.1349	0.0283	0.9402	0.9432	Prostate cancer	4	119585039	0.0192	0.139	GCST90274781	4	119585039	0.0297	5.57e-06	C-X-C motif chemokine 11 levels	0.00175152	1.55e-05	7.77e-05	0.00204633	24.1101	40.9189	20.6306
rs4748380	T	C	T	C	0.0901	-0.0045	0.1188	0.1157	Prostate cancer	10	17590681	0.0143	0.7546	GCST90274781	10	17590681	0.019	2.12e-06	C-X-C motif chemokine 11 levels	0.00152432	7.06e-07	1.02e-05	0.00169969	25.0791	40.9189	22.4876
rs60141220	A	G	A	G	-0.0777	-0.0009	0.1703	0.1825	Prostate cancer	1	26395741	0.0106	0.9308	GCST90274781	1	26395741	0.0165	2.49e-06	C-X-C motif chemokine 11 levels	0.00167474	5.14e-08	7.63e-06	0.00170611	22.5917	40.9189	22.1755
rs7009937	T	C	T	C	0.1175	-0.0006	0.9321	0.9432	Prostate cancer	8	96176796	0.0191	0.9762	GCST90274781	8	96176796	0.025	2.6e-06	C-X-C motif chemokine 11 levels	0.00154388	7.04e-09	7.95e-06	0.00174758	25.0097	40.9189	22.09
rs7222922	T	C	T	C	-0.0882	0.0156	0.1205	0.1144	Prostate cancer	17	34335694	0.0139	0.2609	GCST90274781	17	34335694	0.0182	1.26e-06	C-X-C motif chemokine 11 levels	0.00159249	8.98e-06	2.02e-05	0.00164888	24.3183	40.9189	23.4852
rs72747175	A	G	A	G	0.1535	-0.0289	0.9608	0.963	Prostate cancer	5	18009856	0.0256	0.2596	GCST90274781	5	18009856	0.0326	2.49e-06	C-X-C motif chemokine 11 levels	0.00150309	9.09e-06	3.63e-05	0.00177487	26.1867	40.9189	22.1708
rs72925566	A	G	A	G	-0.0973	0.0145	0.1651	0.1849	Prostate cancer	6	89498971	0.0116	0.2119	GCST90274781	6	89498971	0.0185	1.44e-07	C-X-C motif chemokine 11 levels	0.00243446	1.11e-05	2.42e-06	0.00260998	29.6615	40.9189	27.6619
rs7475335	A	C	A	C	-0.0646	-0.0158	0.3172	0.3211	Prostate cancer	10	104343428	0.0085	0.0644896	GCST90274781	10	104343428	0.0124	1.89e-07	C-X-C motif chemokine 11 levels	0.00183879	2.46e-05	1.18e-05	0.00180768	26.6808	40.9189	27.1407
rs75612655	T	C	T	C	0.5352	-0.0173	0.0084	0.0073	Prostate cancer	7	101594247	0.051	0.734	GCST90274781	7	101594247	0.0705	3.16e-14	C-X-C motif chemokine 11 levels	0.00443633	8.2e-07	8.08e-13	0.00477175	62.009	40.9189	57.6307
rs7750544	T	C	T	C	-0.0773	0.0192	0.165	0.1614	Prostate cancer	6	154177484	0.0111	0.0825791	GCST90274781	6	154177484	0.0164	2.44e-06	C-X-C motif chemokine 11 levels	0.00162587	2.13e-05	6.8e-05	0.00164649	22.4985	40.9189	22.2163
rs77516076	C	G	C	G	0.1915	0.0277	0.0233	0.0179	Prostate cancer	10	50895131	0.0339	0.413	GCST90274781	10	50895131	0.0432	9.3e-06	C-X-C motif chemokine 11 levels	0.00133244	4.76e-06	7.37e-05	0.00166911	24.6237	40.9189	19.6503
rs78632565	T	C	T	C	0.1082	-0.017	0.9152	0.9224	Prostate cancer	8	70982905	0.0154	0.2689	GCST90274781	8	70982905	0.0214	4.28e-07	C-X-C motif chemokine 11 levels	0.00173367	8.69e-06	7.89e-06	0.00181717	26.7975	40.9189	25.5639
rs79378014	A	T	A	T	-0.1549	-0.02	0.0325	0.0315	Prostate cancer	3	114380762	0.0236	0.3958	GCST90274781	3	114380762	0.0341	5.56e-06	C-X-C motif chemokine 11 levels	0.0013987	5.12e-06	4.93e-05	0.00150892	22.2631	40.9189	20.6345
rs10403201	A	G	A	G	-0.0601	-0.0058	0.2925	0.2971	Prostate cancer	19	14764810	0.0094	0.5382	GCST90274782	19	14764810	0.0127	2.22e-06	C-X-C motif chemokine 5 levels	0.00151823	2.71e-06	1.63e-05	0.00149497	22.0508	40.9189	22.3945
rs10821552	A	C	A	C	-0.1132	-0.0165	0.3353	0.3549	Prostate cancer	9	136939992	0.0083	0.04671	GCST90274782	9	136939992	0.0156	3.97e-13	C-X-C motif chemokine 5 levels	0.00532322	2.82e-05	8.09e-11	0.00571192	56.5224	40.9189	52.6555
rs11734099	A	G	A	G	0.0769	-0.01	0.1845	0.1772	Prostate cancer	4	6891435	0.0104	0.3406	GCST90274782	4	6891435	0.0153	5e-07	C-X-C motif chemokine 5 levels	0.00171219	6.59e-06	7.35e-06	0.00177952	26.2573	40.9189	25.2621
rs146553494	A	G	A	G	0.1844	-0.0593	0.0265	0.026	Prostate cancer	3	183850210	0.0269	0.0275499	GCST90274782	3	183850210	0.0377	1e-06	C-X-C motif chemokine 5 levels	0.00162145	3.46e-05	7.13e-05	0.00175442	25.8898	40.9189	23.9243
rs188111670	A	G	A	G	0.0949	-0.0033	0.3428	0.3976	Prostate cancer	22	16564036	0.012	0.7835	GCST90274782	22	16564036	0.0209	5.61e-06	C-X-C motif chemokine 5 levels	0.00265636	5.39e-07	1.33e-05	0.00405789	31.5402	40.9189	20.6177
rs2004100	T	C	T	C	0.0675	-0.0077	0.2492	0.2467	Prostate cancer	8	144554731	0.0096	0.4214	GCST90274782	8	144554731	0.0147	4.39e-06	C-X-C motif chemokine 5 levels	0.00159215	4.59e-06	3.28e-05	0.00170494	22.5813	40.9189	21.085
rs2647400	C	G	C	G	0.0631	-0.0284	0.2784	0.2833	Prostate cancer	6	76351999	0.0091	0.00181798	GCST90274782	6	76351999	0.013	1.21e-06	C-X-C motif chemokine 5 levels	0.00159667	6.94e-05	0.000258321	0.00159976	23.6054	40.9189	23.5598
rs28750249	T	G	T	G	-0.118	-0.0295	0.945	0.9476	Prostate cancer	4	23807061	0.0201	0.1424	GCST90274782	4	23807061	0.0266	9.16e-06	C-X-C motif chemokine 5 levels	0.00133392	1.54e-05	0.000165609	0.0014474	21.3555	40.9189	19.6789
rs3183927	A	G	A	G	-0.0619	0.0007	0.6436	0.6278	Prostate cancer	9	100684757	0.0082	0.9356	GCST90274782	9	100684757	0.0121	3.13e-07	C-X-C motif chemokine 5 levels	0.00177436	5.2e-08	1.31e-06	0.00175778	25.9254	40.9189	26.1704
rs425535	T	C	T	C	0.5063	0.0056	0.1127	0.1139	Prostate cancer	4	74863997	0.0127	0.6598	GCST90274782	4	74863997	0.0181	3.52e-172	C-X-C motif chemokine 5 levels	0.0504436	1.39e-06	8.57e-152	0.0512673	795.92	40.9189	782.454
rs4279906	T	C	T	C	0.2082	0.0275	0.0209	0.0223	Prostate cancer	1	211477063	0.0274	0.316	GCST90274782	1	211477063	0.042	7.15e-07	C-X-C motif chemokine 5 levels	0.00166716	7.18e-06	1.06e-05	0.00177405	26.1515	40.9189	24.5733
rs571211418	A	G	A	G	0.078	0.0167	0.1827	0.1773	Prostate cancer	1	162778011	0.0106	0.1153	GCST90274782	1	162778011	0.0172	5.76e-06	C-X-C motif chemokine 5 levels	0.00174598	1.77e-05	8.99e-05	0.00181693	21.4024	40.9189	20.5652
rs59312158	A	G	A	G	-0.19	-0.0294	0.0309	0.025	Prostate cancer	16	88582345	0.0321	0.3588	GCST90274782	16	88582345	0.0385	8.01e-07	C-X-C motif chemokine 5 levels	0.00177846	5.98e-06	9.15e-06	0.00216204	29.6192	40.9189	24.3549
rs6993770	A	T	A	T	-0.1058	-0.0136	0.7312	0.7251	Prostate cancer	8	106581528	0.0093	0.1453	GCST90274782	8	106581528	0.0135	4.61e-15	C-X-C motif chemokine 5 levels	0.00428085	1.52e-05	2.29e-12	0.00440014	63.1383	40.9189	61.4191
rs7090111	C	G	C	G	-0.1734	0.0031	0.5834	0.5816	Prostate cancer	10	65077994	0.0082	0.705	GCST90274782	10	65077994	0.0117	1.08e-49	C-X-C motif chemokine 5 levels	0.0146895	1.02e-06	3.29e-44	0.0146155	218.524	40.9189	219.648
rs7197943	A	C	A	C	0.0552	-0.0004	0.6522	0.6537	Prostate cancer	16	64226202	0.009	0.967	GCST90274782	16	64226202	0.0123	7.2e-06	C-X-C motif chemokine 5 levels	0.00136664	1.41e-08	2.09e-05	0.00138235	20.3722	40.9189	20.1404
rs7636889	A	G	A	G	-0.0768	-0.0091	0.7593	0.7712	Prostate cancer	3	56874033	0.0095	0.3389	GCST90274782	3	56874033	0.0137	2.07e-08	C-X-C motif chemokine 5 levels	0.00212875	6.54e-06	4.77e-07	0.00215597	31.8282	40.9189	31.4254
rs79649467	T	G	T	G	-0.1721	0.0051	0.0605	0.0594	Prostate cancer	4	74880852	0.0194	0.793699	GCST90274782	4	74880852	0.0276	4.5e-10	C-X-C motif chemokine 5 levels	0.00271427	4.93e-07	4.7e-09	0.00336701	48.2636	40.9189	38.8816
rs916776	T	G	T	G	0.0546	0.0109	0.3883	0.365	Prostate cancer	16	26812516	0.0092	0.2365	GCST90274782	16	26812516	0.0122	7.63e-06	C-X-C motif chemokine 5 levels	0.00140016	1e-05	9.53e-05	0.00141619	20.2589	40.9189	20.0293
rs9429422	T	C	T	C	0.0601	-0.0025	0.2633	0.2496	Prostate cancer	1	112467126	0.0094	0.7906	GCST90274782	1	112467126	0.0135	8.51e-06	C-X-C motif chemokine 5 levels	0.00138538	5.04e-07	3.19e-05	0.00140127	20.0466	40.9189	19.819
rs12075	A	G	A	G	0.0816	0.0063	0.5554	0.5736	Prostate cancer	1	159175354	0.0082	0.4433	GCST90274783	1	159175354	0.0115	1.29e-12	C-X-C motif chemokine 6 levels	0.00340436	4.21e-06	7.57e-11	0.00328841	48.6277	40.9189	50.3483
rs182381042	A	G	A	G	-0.3831	0.07	0.0074	0.007	Prostate cancer	8	93838957	0.0511	0.1706	GCST90274783	8	93838957	0.0799	1.63e-06	C-X-C motif chemokine 6 levels	0.00177443	1.34e-05	2.81e-05	0.00215606	27.9445	40.9189	22.9896
rs597808	A	G	A	G	0.0655	-0.0202	0.4781	0.4834	Prostate cancer	12	111973358	0.0082	0.0139399	GCST90274783	12	111973358	0.0135	1.22e-06	C-X-C motif chemokine 6 levels	0.00207121	4.33e-05	6.57e-05	0.00214101	24.3354	40.9189	23.5405
rs74361503	T	C	T	C	-0.2873	0.0188	0.0558	0.0535	Prostate cancer	4	74667328	0.0196	0.3357	GCST90274783	4	74667328	0.027	1.93e-26	C-X-C motif chemokine 6 levels	0.00762449	6.56e-06	9.88e-23	0.0086976	129.301	40.9189	113.225
rs9371716	T	C	T	C	-0.0919	0.0171	0.1328	0.1379	Prostate cancer	6	154000019	0.0118	0.1464	GCST90274783	6	154000019	0.0193	1.92e-06	C-X-C motif chemokine 6 levels	0.00182369	1.5e-05	3.33e-05	0.00194526	24.1878	40.9189	22.6734
rs10008912	A	G	A	G	0.0586	-0.0055	0.5255	0.5373	Prostate cancer	4	7148069	0.0097	0.5699	GCST90274784	4	7148069	0.0131	7.7e-06	C-X-C motif chemokine 9 levels	0.00139883	2.29e-06	4.35e-05	0.00171251	24.5052	40.9189	20.0103
rs10921271	A	G	A	G	0.0626	0.0034	0.6904	0.6954	Prostate cancer	1	192799276	0.0094	0.7195	GCST90274784	1	192799276	0.0138	5.73e-06	C-X-C motif chemokine 9 levels	0.00165645	9.33e-07	2.2e-05	0.00167525	20.8114	40.9189	20.5774
rs11130569	A	G	A	G	-0.051	0.0016	0.4547	0.4486	Prostate cancer	3	57075894	0.0081	0.8461	GCST90274784	3	57075894	0.0114	7.69e-06	C-X-C motif chemokine 9 levels	0.00135733	2.78e-07	2.74e-05	0.00128983	19.0172	40.9189	20.0139
rs113504136	T	G	T	G	-0.1494	0.0019	0.0325	0.0297	Prostate cancer	10	13400390	0.0272	0.9449	GCST90274784	10	13400390	0.0338	9.86e-06	C-X-C motif chemokine 9 levels	0.00132542	3.48e-08	2.89e-05	0.00140367	20.6925	40.9189	19.5374
rs114033894	T	G	T	G	-0.2245	-0.0725	0.981	0.9826	Prostate cancer	2	86977227	0.0353	0.0400101	GCST90274784	2	86977227	0.0488	4.22e-06	C-X-C motif chemokine 9 levels	0.00147935	3.01e-05	0.000171965	0.00187882	26.8895	40.9189	21.1638
rs118106660	A	G	A	G	0.259	-0.0284	0.0138	0.0122	Prostate cancer	14	54798313	0.0435	0.5138	GCST90274784	14	54798313	0.0573	6.18e-06	C-X-C motif chemokine 9 levels	0.00147854	3.04e-06	3.85e-05	0.00182589	25.2397	40.9189	20.431
rs142119726	T	C	T	C	0.2705	0.0475	0.9851	0.9887	Prostate cancer	7	48859798	0.0412	0.2486	GCST90274784	7	48859798	0.0551	9.14e-07	C-X-C motif chemokine 9 levels	0.00174364	9.48e-06	1.44e-05	0.00214798	29.7017	40.9189	24.1008
rs1758695	T	G	T	G	0.0511	0.0085	0.5681	0.577	Prostate cancer	9	94165889	0.0105	0.4161	GCST90274784	9	94165889	0.0115	8.85e-06	C-X-C motif chemokine 9 levels	0.00133863	4.67e-06	7e-05	0.00128138	18.899	40.9189	19.7445
rs182152471	T	C	T	C	0.1861	0.0117	0.028	0.0263	Prostate cancer	16	1803589	0.028	0.675899	GCST90274784	16	1803589	0.0385	1.34e-06	C-X-C motif chemokine 9 levels	0.00170695	1.24e-06	7.18e-06	0.00188515	25.8093	40.9189	23.3653
rs192119373	T	G	T	G	0.6177	0.0074	0.0057	0.0056	Prostate cancer	1	3823464	0.075	0.9211	GCST90274784	1	3823464	0.1287	1.59e-06	C-X-C motif chemokine 9 levels	0.00260287	6.94e-08	3.67e-06	0.00432491	38.3418	40.9189	23.0355
rs192488790	T	C	T	C	0.2369	0.0202	0.0168	0.0139	Prostate cancer	11	7767109	0.041	0.6222	GCST90274784	11	7767109	0.0532	8.47e-06	C-X-C motif chemokine 9 levels	0.00147552	1.73e-06	4e-05	0.00185401	24.9251	40.9189	19.8293
rs2535260	C	G	C	G	0.0642	0.0259	0.8128	0.8105	Prostate cancer	6	29628883	0.0102	0.0111499	GCST90274784	6	29628883	0.0144	8.26e-06	C-X-C motif chemokine 9 levels	0.00134731	4.6e-05	0.000545835	0.00125427	18.5023	40.9189	19.8767
rs3184504	T	C	T	C	0.1008	-0.0187	0.4744	0.4811	Prostate cancer	12	111884608	0.0082	0.0218102	GCST90274784	12	111884608	0.013	8.92e-15	C-X-C motif chemokine 9 levels	0.00507697	3.71e-05	1e-11	0.005067	60.0035	40.9189	60.1221
rs35435997	A	G	A	G	0.0915	0.0528	0.1125	0.1134	Prostate cancer	2	242665455	0.0158	0.000862105	GCST90274784	2	242665455	0.02	4.76e-06	C-X-C motif chemokine 9 levels	0.00163394	7.96e-05	0.000644082	0.00167183	21.4169	40.9189	20.9306
rs368022534	A	G	A	G	0.1686	0.0154	0.9563	0.9549	Prostate cancer	11	102612924	0.0198	0.4363	GCST90274784	11	102612924	0.0371	5.51e-06	C-X-C motif chemokine 9 levels	0.00222674	4.31e-06	2.6e-05	0.00237586	22.0386	40.9189	20.6522
rs4047522	T	C	T	C	-0.0645	-0.0091	0.4962	0.4814	Prostate cancer	1	161608256	0.0096	0.3414	GCST90274784	1	161608256	0.0137	2.5e-06	C-X-C motif chemokine 9 levels	0.0018816	6.41e-06	2.07e-05	0.00208	24.5077	40.9189	22.1655
rs4888966	C	G	C	G	-0.157	-0.0304	0.9683	0.976	Prostate cancer	16	79431853	0.0266	0.2542	GCST90274784	16	79431853	0.0343	4.71e-06	C-X-C motif chemokine 9 levels	0.00146452	9.31e-06	6.02e-05	0.00151321	21.6489	40.9189	20.9513
rs58524610	T	G	T	G	0.223	-0.0321	0.0204	0.0131	Prostate cancer	12	11768143	0.041	0.4342	GCST90274784	12	11768143	0.0491	5.58e-06	C-X-C motif chemokine 9 levels	0.00144192	4.37e-06	4.36e-05	0.00198755	28.4487	40.9189	20.6275
rs61875680	A	G	A	G	-0.0758	0.0273	0.1611	0.1607	Prostate cancer	10	107966626	0.0129	0.0335598	GCST90274784	10	107966626	0.0158	1.61e-06	C-X-C motif chemokine 9 levels	0.00160859	3.19e-05	8.65e-05	0.00155301	22.2192	40.9189	23.0157
rs62200304	A	C	A	C	-0.115	-0.0127	0.9336	0.9348	Prostate cancer	20	20119931	0.0178	0.4777	GCST90274784	20	20119931	0.0244	2.44e-06	C-X-C motif chemokine 9 levels	0.00155261	3.63e-06	1.94e-05	0.00163966	23.4611	40.9189	22.2135
rs62272916	A	G	A	G	-0.0834	0.0054	0.1182	0.1232	Prostate cancer	3	151541803	0.0122	0.6578	GCST90274784	3	151541803	0.0176	2.15e-06	C-X-C motif chemokine 9 levels	0.00152437	1.4e-06	1.24e-05	0.00144994	21.3567	40.9189	22.4547
rs6548432	A	G	A	G	-0.0514	-0.0103	0.4276	0.4348	Prostate cancer	3	76525063	0.0085	0.2271	GCST90274784	3	76525063	0.0114	6.52e-06	C-X-C motif chemokine 9 levels	0.00137896	1.05e-05	9.05e-05	0.00129328	19.0644	40.9189	20.329
rs656739	A	G	A	G	0.0562	-0.0113	0.6566	0.6506	Prostate cancer	7	29049949	0.0086	0.189	GCST90274784	7	29049949	0.0119	2.33e-06	C-X-C motif chemokine 9 levels	0.00151158	1.23e-05	4.38e-05	0.00142431	21.0143	40.9189	22.3038
rs6586167	T	G	T	G	-0.052	-0.0133	0.5056	0.5079	Prostate cancer	10	90756146	0.0081	0.0988804	GCST90274784	10	90756146	0.0114	5.08e-06	C-X-C motif chemokine 9 levels	0.00141024	1.92e-05	0.000127212	0.00135183	19.9435	40.9189	20.8064
rs72991127	C	G	C	G	-0.0583	-0.0034	0.264	0.2582	Prostate cancer	2	236906094	0.0094	0.7163	GCST90274784	2	236906094	0.0131	8.57e-06	C-X-C motif chemokine 9 levels	0.00138456	9.33e-07	3.65e-05	0.00132084	18.8931	40.9189	19.8059
rs73194812	A	G	A	G	0.1821	0.0399	0.9758	0.9743	Prostate cancer	21	18734554	0.0287	0.1645	GCST90274784	21	18734554	0.0391	3.2e-06	C-X-C motif chemokine 9 levels	0.00147056	1.38e-05	6.32e-05	0.00156612	23.1021	40.9189	21.6903
rs73606147	A	C	A	C	0.2792	0.0295	0.0133	0.0161	Prostate cancer	20	2538467	0.0346	0.3933	GCST90274784	20	2538467	0.059	2.22e-06	C-X-C motif chemokine 9 levels	0.00167125	5.18e-06	1.97e-05	0.00204596	27.4249	40.9189	22.3937
rs7429588	T	C	T	C	0.0592	-0.0039	0.706	0.714	Prostate cancer	3	46835250	0.0095	0.679499	GCST90274784	3	46835250	0.0134	9.97e-06	C-X-C motif chemokine 9 levels	0.00136465	1.2e-06	4.45e-05	0.00145487	20.8102	40.9189	19.5179
rs75525140	C	G	C	G	-0.2062	0.0053	0.9819	0.9826	Prostate cancer	18	28624793	0.0341	0.8761	GCST90274784	18	28624793	0.0465	9.23e-06	C-X-C motif chemokine 9 levels	0.00133381	1.72e-07	3.05e-05	0.00151131	22.2847	40.9189	19.664
rs7600322	T	C	T	C	0.057	0.0012	0.5214	0.5229	Prostate cancer	2	204754353	0.0081	0.886	GCST90274784	2	204754353	0.0118	1.36e-06	C-X-C motif chemokine 9 levels	0.00168228	1.56e-07	5.05e-06	0.00162152	22.4897	40.9189	23.3338
rs79551873	T	C	T	C	0.0533	0.0004	0.3563	0.3566	Prostate cancer	2	231423737	0.0083	0.9629	GCST90274784	2	231423737	0.0119	7.5e-06	C-X-C motif chemokine 9 levels	0.0014024	1.66e-08	2.13e-05	0.00130312	18.6393	40.9189	20.0614
rs80348644	T	C	T	C	0.1546	-0.0075	0.0336	0.0297	Prostate cancer	4	160574480	0.0237	0.752101	GCST90274784	4	160574480	0.0332	3.21e-06	C-X-C motif chemokine 9 levels	0.00146975	7.14e-07	1.48e-05	0.00155219	22.9024	40.9189	21.6842
rs9366778	A	G	A	G	-0.0605	0.029	0.4075	0.4076	Prostate cancer	6	31269173	0.0081	0.000349197	GCST90274784	6	31269173	0.0115	1.43e-07	C-X-C motif chemokine 9 levels	0.00187503	9.14e-05	9.66e-05	0.00176749	26.0865	40.9189	27.6767
rs10191831	T	C	T	C	-0.0591	0.0122	0.4361	0.4551	Prostate cancer	2	41864408	0.0081	0.1336	GCST90274785	2	41864408	0.0125	2.27e-06	Delta and Notch-like epidermal growth factor-related receptor levels	0.00179935	1.62e-05	4.11e-05	0.00171788	21.3401	40.9189	22.354
rs10892466	C	G	C	G	0.0808	0.0131	0.1236	0.1205	Prostate cancer	11	119661317	0.0128	0.3052	GCST90274785	11	119661317	0.0175	3.89e-06	Delta and Notch-like epidermal growth factor-related receptor levels	0.00144516	7.47e-06	4.59e-05	0.0014144	20.8637	40.9189	21.318
rs1133851	A	G	A	G	-0.0664	0.0134	0.2533	0.2507	Prostate cancer	18	3722038	0.01	0.1775	GCST90274785	18	3722038	0.0142	2.92e-06	Delta and Notch-like epidermal growth factor-related receptor levels	0.00152843	1.28e-05	5.21e-05	0.00166781	23.8628	40.9189	21.8655
rs116179073	T	C	T	C	-0.2481	0.0125	0.0138	0.0146	Prostate cancer	12	31458615	0.0372	0.736701	GCST90274785	12	31458615	0.0537	3.84e-06	Delta and Notch-like epidermal growth factor-related receptor levels	0.0015446	8.05e-07	1.66e-05	0.00167544	23.1565	40.9189	21.3454
rs116540722	A	G	A	G	-0.1726	-0.0353	0.0313	0.0328	Prostate cancer	2	168312525	0.028	0.207	GCST90274785	2	168312525	0.0381	5.89e-06	Delta and Notch-like epidermal growth factor-related receptor levels	0.00139103	1.13e-05	8.87e-05	0.00180653	26.6638	40.9189	20.5226
rs116927267	A	G	A	G	-0.1742	-0.0049	0.0257	0.024	Prostate cancer	20	4054373	0.0295	0.8666	GCST90274785	20	4054373	0.0389	7.53e-06	Delta and Notch-like epidermal growth factor-related receptor levels	0.00135939	1.97e-07	2.58e-05	0.00151968	22.422	40.9189	20.0538
rs11725578	C	G	C	G	-0.0584	-0.0049	0.697	0.6851	Prostate cancer	4	160466825	0.0092	0.5945	GCST90274785	4	160466825	0.0128	5.05e-06	Delta and Notch-like epidermal growth factor-related receptor levels	0.0014551	2.02e-06	2.87e-05	0.00144056	20.6081	40.9189	20.8164
rs117343254	C	G	C	G	-0.1281	-0.031	0.942	0.9512	Prostate cancer	7	152385669	0.0213	0.1459	GCST90274785	7	152385669	0.0274	2.94e-06	Delta and Notch-like epidermal growth factor-related receptor levels	0.00152775	1.51e-05	6.07e-05	0.00179311	25.6606	40.9189	21.8573
rs13107325	T	C	T	C	0.1066	-0.0148	0.0697	0.0684	Prostate cancer	4	103188709	0.0163	0.3647	GCST90274785	4	103188709	0.0233	4.76e-06	Delta and Notch-like epidermal growth factor-related receptor levels	0.001419	5.88e-06	4.68e-05	0.00147367	21.7392	40.9189	20.9316
rs194746	T	C	T	C	0.0528	-0.0094	0.4849	0.4867	Prostate cancer	14	69282887	0.0081	0.2462	GCST90274785	14	69282887	0.0112	2.43e-06	Delta and Notch-like epidermal growth factor-related receptor levels	0.00150744	9.6e-06	3.69e-05	0.00139265	20.5298	40.9189	22.2245
rs207671	A	G	A	G	0.1016	0.002	0.5359	0.5507	Prostate cancer	2	230256586	0.0082	0.808	GCST90274785	2	230256586	0.0117	3.83e-18	Delta and Notch-like epidermal growth factor-related receptor levels	0.00525108	4.24e-07	2.59e-16	0.00513467	73.7274	40.9189	75.4077
rs2837988	A	C	A	C	0.0576	-0.0013	0.3578	0.3625	Prostate cancer	21	42619544	0.0084	0.8724	GCST90274785	21	42619544	0.0118	1.05e-06	Delta and Notch-like epidermal growth factor-related receptor levels	0.0016149	1.71e-07	4.34e-06	0.0015247	22.4947	40.9189	23.8276
rs28689968	T	C	T	C	0.0918	-0.0286	0.1074	0.1069	Prostate cancer	17	47247257	0.0131	0.0288802	GCST90274785	17	47247257	0.0184	6.07e-07	Delta and Notch-like epidermal growth factor-related receptor levels	0.00168688	3.4e-05	4.67e-05	0.00161576	23.8403	40.9189	24.8914
rs35032874	T	G	T	G	0.132	0.0059	0.7027	0.7131	Prostate cancer	2	230309360	0.0099	0.5533	GCST90274785	2	230309360	0.0132	1.52e-23	Delta and Notch-like epidermal growth factor-related receptor levels	0.00695169	2.53e-06	1.02e-20	0.00728019	104.76	40.9189	100
rs535948847	T	G	T	G	0.1757	-0.0152	0.9502	0.9615	Prostate cancer	17	7724454	0.0278	0.586001	GCST90274785	17	7724454	0.0395	8.66e-06	Delta and Notch-like epidermal growth factor-related receptor levels	0.00181323	2.13e-06	3.53e-05	0.00292158	31.9151	40.9189	19.7856
rs62193248	A	T	A	T	0.213	0.0007	0.6507	0.6619	Prostate cancer	2	230596917	0.0086	0.9332	GCST90274785	2	230596917	0.0123	3.5e-67	Delta and Notch-like epidermal growth factor-related receptor levels	0.0205611	4.72e-08	1.5e-60	0.0206238	300.815	40.9189	299.881
rs62253189	A	G	A	G	-0.108	0.041	0.9404	0.9439	Prostate cancer	3	69959680	0.0183	0.0248702	GCST90274785	3	69959680	0.0244	9.59e-06	Delta and Notch-like epidermal growth factor-related receptor levels	0.00132954	3.58e-05	0.000432558	0.00130748	19.2661	40.9189	19.5915
rs6517655	C	G	C	G	0.0757	0.0136	0.289	0.289	Prostate cancer	21	42536246	0.009	0.1297	GCST90274785	21	42536246	0.0129	4.41e-09	Delta and Notch-like epidermal growth factor-related receptor levels	0.00240484	1.63e-05	2.92e-07	0.00235499	33.7205	40.9189	34.436
rs7123587	A	C	A	C	-0.0552	0.0151	0.6266	0.6342	Prostate cancer	11	1681922	0.0085	0.0757094	GCST90274785	11	1681922	0.0124	8.52e-06	Delta and Notch-like epidermal growth factor-related receptor levels	0.00149676	2.25e-05	0.00018922	0.00142585	18.8766	40.9189	19.8169
rs74890918	A	G	A	G	0.2266	-0.0095	0.0157	0.0161	Prostate cancer	6	32953148	0.0327	0.7718	GCST90274785	6	32953148	0.0502	6.36e-06	Delta and Notch-like epidermal growth factor-related receptor levels	0.00142434	6.02e-07	2.54e-05	0.001587	22.7063	40.9189	20.3757
rs75685422	T	C	T	C	0.0879	-0.0034	0.1139	0.1054	Prostate cancer	14	95752666	0.0139	0.805	GCST90274785	14	95752666	0.0186	2.29e-06	Delta and Notch-like epidermal growth factor-related receptor levels	0.00156097	4.27e-07	9.58e-06	0.0015596	22.3137	40.9189	22.3332
rs773112	T	C	T	C	0.0566	0.0094	0.3128	0.3167	Prostate cancer	12	56375881	0.0086	0.2701	GCST90274785	12	56375881	0.0125	5.95e-06	Delta and Notch-like epidermal growth factor-related receptor levels	0.00143321	8.52e-06	6.89e-05	0.00137725	19.7011	40.9189	20.5028
rs7809355	A	C	A	C	-0.0734	-0.0048	0.1553	0.1523	Prostate cancer	7	25386238	0.0122	0.6904	GCST90274785	7	25386238	0.0164	7.62e-06	Delta and Notch-like epidermal growth factor-related receptor levels	0.00140028	1.1e-06	3.43e-05	0.0014135	20.2204	40.9189	20.0311
rs79707450	A	C	A	C	-0.1295	-0.0062	0.0417	0.0374	Prostate cancer	9	113309819	0.0225	0.7813	GCST90274785	9	113309819	0.0287	6.42e-06	Delta and Notch-like epidermal growth factor-related receptor levels	0.00138021	5.41e-07	2.6e-05	0.00134032	19.7707	40.9189	20.3599
rs9289590	T	C	T	C	-0.0652	0.0051	0.7033	0.696	Prostate cancer	3	139639117	0.0091	0.5779	GCST90274785	3	139639117	0.0142	4.4e-06	Delta and Notch-like epidermal growth factor-related receptor levels	0.00169703	2.24e-06	2.24e-05	0.00177412	22.0418	40.9189	21.0823
rs9597690	A	G	A	G	-0.0531	0.0036	0.646	0.6407	Prostate cancer	13	58788135	0.0087	0.6789	GCST90274785	13	58788135	0.0118	6.8e-06	Delta and Notch-like epidermal growth factor-related receptor levels	0.00137398	1.22e-06	3.29e-05	0.0012896	19.0048	40.9189	20.25
rs9967959	T	G	T	G	0.0718	-0.0114	0.1718	0.179	Prostate cancer	21	28101979	0.0123	0.3531	GCST90274785	21	28101979	0.0152	2.32e-06	Delta and Notch-like epidermal growth factor-related receptor levels	0.00151262	6.12e-06	2.59e-05	0.00146702	21.6395	40.9189	22.3132
rs112956934	T	C	T	C	0.1884	-0.019	0.0246	0.0228	Prostate cancer	12	96571503	0.0299	0.5246	GCST90274786	12	96571503	0.0407	3.67e-06	Protein S100-A12 levels	0.00145208	2.88e-06	2.6e-05	0.00170337	25.142	40.9189	21.4276
rs112988802	T	C	T	C	-0.1396	0.0227	0.9492	0.9492	Prostate cancer	14	59990514	0.0188	0.2265	GCST90274786	14	59990514	0.0293	1.89e-06	Protein S100-A12 levels	0.0017636	1.04e-05	2.57e-05	0.00187941	24.1941	40.9189	22.7005
rs113955692	T	C	T	C	0.1621	-0.0142	0.0315	0.0294	Prostate cancer	16	79653201	0.0293	0.6284	GCST90274786	16	79653201	0.0366	9.47e-06	Protein S100-A12 levels	0.00137052	1.67e-06	4.69e-05	0.00160327	22.9523	40.9189	19.6157
rs117923478	T	C	T	C	0.1795	-0.0277	0.9721	0.97	Prostate cancer	7	81211709	0.0264	0.2933	GCST90274786	7	81211709	0.0395	5.51e-06	Protein S100-A12 levels	0.00144273	7.85e-06	6.1e-05	0.00174773	25.024	40.9189	20.6507
rs13384799	T	C	T	C	-0.0622	-0.0165	0.7266	0.7125	Prostate cancer	2	125135589	0.0087	0.0577803	GCST90274786	2	125135589	0.0133	2.92e-06	Protein S100-A12 levels	0.00152788	2.56e-05	0.000105681	0.00153711	22.0037	40.9189	21.8714
rs140298956	A	C	A	C	-0.2114	-0.0211	0.0217	0.015	Prostate cancer	5	39597187	0.0371	0.5687	GCST90274786	5	39597187	0.0467	5.99e-06	Protein S100-A12 levels	0.00143163	2.31e-06	3.5e-05	0.00189746	27.1719	40.9189	20.4916
rs147302029	A	G	A	G	0.1806	-0.0181	0.0379	0.0344	Prostate cancer	16	4602209	0.0247	0.4646	GCST90274786	16	4602209	0.0345	1.65e-07	Protein S100-A12 levels	0.00200396	3.83e-06	1.78e-06	0.00237862	32.5384	40.9189	27.4029
rs150015576	A	C	A	C	0.194	-0.019	0.0217	0.0214	Prostate cancer	3	174824333	0.0307	0.5345	GCST90274786	3	174824333	0.0423	4.51e-06	Protein S100-A12 levels	0.00142516	2.73e-06	3.04e-05	0.00159796	23.5884	40.9189	21.034
rs150886675	A	G	A	G	-0.411	0.017	0.0085	0.008	Prostate cancer	2	227300526	0.0518	0.742899	GCST90274786	2	227300526	0.0911	6.44e-06	Protein S100-A12 levels	0.00205712	7.68e-07	1.91e-05	0.00284725	28.194	40.9189	20.3539
rs17325940	T	C	T	C	-0.0784	0.0019	0.8611	0.8668	Prostate cancer	3	60071129	0.0117	0.8677	GCST90274786	3	60071129	0.0174	6.61e-06	Protein S100-A12 levels	0.00137608	1.88e-07	2.28e-05	0.00147034	21.6944	40.9189	20.3018
rs1846881	A	G	A	G	-0.0737	-0.0267	0.1925	0.1899	Prostate cancer	4	16409999	0.0105	0.01133	GCST90274786	4	16409999	0.0165	7.94e-06	Protein S100-A12 levels	0.00163133	4.61e-05	0.000366405	0.00168864	20.6532	40.9189	19.9511
rs191808657	A	C	A	C	0.3059	0.0565	0.983	0.9869	Prostate cancer	7	75133433	0.0493	0.252	GCST90274786	7	75133433	0.0665	4.22e-06	Protein S100-A12 levels	0.00170217	9.36e-06	4.49e-05	0.00312746	38.9335	40.9189	21.16
rs2056031	T	C	T	C	-0.0604	-0.0223	0.613	0.6094	Prostate cancer	4	12920594	0.0084	0.00821807	GCST90274786	4	12920594	0.0119	3.86e-07	Protein S100-A12 levels	0.00174507	5.02e-05	6.12e-05	0.00173091	25.5527	40.9189	25.762
rs2946493	T	C	T	C	0.0664	0.0008	0.7902	0.7991	Prostate cancer	8	12823671	0.0105	0.9381	GCST90274786	8	12823671	0.0148	7.24e-06	Protein S100-A12 levels	0.0014063	4.14e-08	2.14e-05	0.00146187	20.9251	40.9189	20.1286
rs3014874	A	G	A	G	-0.1726	-0.0036	0.2623	0.2561	Prostate cancer	1	153337943	0.0109	0.742499	GCST90274786	1	153337943	0.0137	2.15e-36	Protein S100-A12 levels	0.0109838	7.78e-07	1.52e-32	0.0115289	166.694	40.9189	158.723
rs369132765	A	C	A	C	0.1301	0.0155	0.0558	0.0539	Prostate cancer	9	27275548	0.019	0.4147	GCST90274786	9	27275548	0.0294	9.64e-06	Protein S100-A12 levels	0.00160357	4.75e-06	6.01e-05	0.00178354	21.7838	40.9189	19.5821
rs3802266	A	G	A	G	0.0555	0.0156	0.5633	0.5577	Prostate cancer	8	123985708	0.0083	0.05905	GCST90274786	8	123985708	0.0118	2.56e-06	Protein S100-A12 levels	0.00149876	2.52e-05	9.89e-05	0.00151544	22.3685	40.9189	22.1219
rs55783131	T	C	T	C	0.2064	0.075	0.0239	0.0224	Prostate cancer	22	17406250	0.0299	0.0121801	GCST90274786	22	17406250	0.0425	1.19e-06	Protein S100-A12 levels	0.00159905	4.49e-05	0.000120343	0.00198766	29.3285	40.9189	23.5853
rs56268787	T	C	T	C	-0.0936	0.023	0.0955	0.0914	Prostate cancer	3	152573197	0.014	0.1008	GCST90274786	3	152573197	0.0203	4.01e-06	Protein S100-A12 levels	0.00144073	1.92e-05	0.000105122	0.00151354	22.3358	40.9189	21.2598
rs59538998	C	G	C	G	-0.1188	0.0148	0.0622	0.0604	Prostate cancer	1	245480237	0.0195	0.4475	GCST90274786	1	245480237	0.0258	4.13e-06	Protein S100-A12 levels	0.00148124	4.11e-06	3.26e-05	0.00164651	23.5723	40.9189	21.2028
rs61742155	A	C	A	C	0.0805	-0.0045	0.129	0.1273	Prostate cancer	18	3896518	0.0139	0.749	GCST90274786	18	3896518	0.018	7.74e-06	Protein S100-A12 levels	0.00135626	7.47e-07	3.27e-05	0.00145623	21.4772	40.9189	20.0008
rs61803119	T	G	T	G	0.1501	-0.0301	0.1069	0.1033	Prostate cancer	1	153390202	0.0143	0.0354299	GCST90274786	1	153390202	0.0194	1.02e-14	Protein S100-A12 levels	0.0041708	3.16e-05	1.75e-11	0.00430199	61.754	40.9189	59.8629
rs78800546	A	G	A	G	-0.2529	-0.0608	0.0156	0.013	Prostate cancer	11	31879143	0.0382	0.1116	GCST90274786	11	31879143	0.0534	2.18e-06	Protein S100-A12 levels	0.00156679	1.81e-05	5.67e-05	0.00196437	28.132	40.9189	22.4293
rs10777251	A	G	A	G	-0.0767	0.0061	0.1923	0.19	Prostate cancer	12	91080475	0.0112	0.584901	GCST90274787	12	91080475	0.0166	3.83e-06	Fibroblast growth factor 19 levels	0.00171748	2.12e-06	1.94e-05	0.00182747	22.7186	40.9189	21.3489
rs111914842	T	C	T	C	-0.1634	0.01	0.0368	0.0259	Prostate cancer	22	46332463	0.0324	0.758901	GCST90274787	22	46332463	0.0362	6.37e-06	Fibroblast growth factor 19 levels	0.00148878	6.79e-07	2.49e-05	0.00189277	25.9138	40.9189	20.3745
rs112126444	A	G	A	G	-0.0927	0.0303	0.1012	0.0914	Prostate cancer	3	132162249	0.0145	0.0363396	GCST90274787	3	132162249	0.0199	3.19e-06	Fibroblast growth factor 19 levels	0.0014707	3.11e-05	0.000153171	0.00156327	23.0677	40.9189	21.6997
rs11244038	C	G	C	G	0.1199	-0.0119	0.0898	0.0658	Prostate cancer	9	136095770	0.0166	0.4735	GCST90274787	9	136095770	0.0247	1.21e-06	Fibroblast growth factor 19 levels	0.00199565	3.66e-06	8.16e-06	0.00235007	27.7585	40.9189	23.5638
rs117398067	T	C	T	C	0.2583	0.0666	0.0178	0.0113	Prostate cancer	15	59188192	0.0456	0.144	GCST90274787	15	59188192	0.0564	4.65e-06	Fibroblast growth factor 19 levels	0.00142075	1.52e-05	9.42e-05	0.00233291	34.4722	40.9189	20.9745
rs117438391	T	C	T	C	-0.2079	-0.0228	0.0225	0.0221	Prostate cancer	14	38084604	0.0316	0.471	GCST90274787	14	38084604	0.0466	8.14e-06	Fibroblast growth factor 19 levels	0.00143338	3.71e-06	5.38e-05	0.00190125	26.4129	40.9189	19.9039
rs12110436	T	C	T	C	-0.136	0.0205	0.0418	0.0402	Prostate cancer	6	168606201	0.0207	0.3206	GCST90274787	6	168606201	0.0297	4.67e-06	Fibroblast growth factor 19 levels	0.00142043	6.99e-06	5.14e-05	0.00148163	21.8731	40.9189	20.9684
rs12342925	A	T	A	T	-0.1352	0.0566	0.0429	0.0395	Prostate cancer	9	82082569	0.021	0.00688002	GCST90274787	9	82082569	0.0299	6.13e-06	Fibroblast growth factor 19 levels	0.00138501	5.18e-05	0.000522379	0.00150106	22.1619	40.9189	20.4461
rs12407505	A	G	A	G	-0.1614	-0.0126	0.9664	0.9718	Prostate cancer	1	85295202	0.0253	0.617401	GCST90274787	1	85295202	0.0352	4.53e-06	Fibroblast growth factor 19 levels	0.00142499	1.77e-06	2.59e-05	0.00169174	24.9666	40.9189	21.0243
rs12520287	T	C	T	C	-0.1014	-0.041	0.9175	0.9175	Prostate cancer	5	54847098	0.0145	0.00471998	GCST90274787	5	54847098	0.0221	4.47e-06	Fibroblast growth factor 19 levels	0.00147061	5.7e-05	0.00044845	0.00155656	22.2842	40.9189	21.0519
rs13103023	A	G	A	G	0.0837	-0.0102	0.3415	0.3378	Prostate cancer	4	39457617	0.0085	0.2307	GCST90274787	4	39457617	0.0124	1.48e-11	Fibroblast growth factor 19 levels	0.0031774	1.03e-05	1.35e-09	0.00315085	45.1806	40.9189	45.5625
rs141140791	T	C	T	C	-0.1293	0.006	0.0497	0.0434	Prostate cancer	10	61186227	0.0205	0.771299	GCST90274787	10	61186227	0.0286	6.16e-06	Fibroblast growth factor 19 levels	0.00138558	6.11e-07	2.56e-05	0.00157923	23.3004	40.9189	20.4393
rs142067135	A	G	A	G	-0.2295	-0.0165	0.0198	0.0159	Prostate cancer	12	76644195	0.038	0.6643	GCST90274787	12	76644195	0.0492	3.09e-06	Fibroblast growth factor 19 levels	0.00157345	1.34e-06	1.56e-05	0.00204444	28.2855	40.9189	21.7588
rs142585344	A	G	A	G	0.2133	0.0351	0.0218	0.0203	Prostate cancer	2	32584586	0.0313	0.2619	GCST90274787	2	32584586	0.0482	9.63e-06	Fibroblast growth factor 19 levels	0.00141636	8.97e-06	0.000102113	0.00194042	26.8435	40.9189	19.5834
rs145274424	T	C	T	C	0.1992	0.0552	0.9777	0.9784	Prostate cancer	7	17445553	0.0287	0.0540904	GCST90274787	7	17445553	0.0421	2.23e-06	Fibroblast growth factor 19 levels	0.00151727	2.64e-05	9.35e-05	0.00173029	25.5366	40.9189	22.388
rs145434248	A	G	A	G	-0.1442	0.0174	0.0425	0.0399	Prostate cancer	14	64892172	0.0253	0.491801	GCST90274787	14	64892172	0.0323	8.03e-06	Fibroblast growth factor 19 levels	0.00139241	3.37e-06	5.28e-05	0.00169234	24.2313	40.9189	19.9308
rs17326790	T	C	T	C	0.2161	-0.06	0.0209	0.0158	Prostate cancer	13	85357827	0.0354	0.0900803	GCST90274787	13	85357827	0.0471	4.47e-06	Fibroblast growth factor 19 levels	0.0014262	2.05e-05	0.000122694	0.00191123	28.2236	40.9189	21.0508
rs191522330	T	C	T	C	0.2325	0.0359	0.9812	0.9827	Prostate cancer	11	5610048	0.0354	0.3111	GCST90274787	11	5610048	0.0488	1.89e-06	Fibroblast growth factor 19 levels	0.00153801	7.33e-06	2.46e-05	0.0019943	29.4468	40.9189	22.699
rs2306969	A	G	A	G	0.0674	0.0176	0.2338	0.2282	Prostate cancer	19	5851801	0.0104	0.0908992	GCST90274787	19	5851801	0.0141	1.75e-06	Fibroblast growth factor 19 levels	0.0015481	2.04e-05	5.72e-05	0.00162756	24.0244	40.9189	22.8498
rs2906655	T	C	T	C	-0.0623	-0.0016	0.2503	0.2408	Prostate cancer	7	101569302	0.0094	0.8652	GCST90274787	7	101569302	0.0135	3.93e-06	Fibroblast growth factor 19 levels	0.00144263	2.07e-07	1.45e-05	0.00145665	21.5038	40.9189	21.2965
rs35836706	A	G	A	G	0.2151	0.0016	0.0203	0.0189	Prostate cancer	9	84435749	0.0343	0.9629	GCST90274787	9	84435749	0.0456	2.39e-06	Fibroblast growth factor 19 levels	0.00150811	1.55e-08	7.76e-06	0.00184035	27.162	40.9189	22.2511
rs3846346	T	G	T	G	0.1372	0.0016	0.0459	0.0417	Prostate cancer	4	27730465	0.0235	0.946	GCST90274787	4	27730465	0.0305	6.85e-06	Fibroblast growth factor 19 levels	0.00137214	3.31e-08	2.07e-05	0.00164871	24.3207	40.9189	20.2352
rs4483036	A	C	A	C	-0.0675	0.0128	0.2516	0.2352	Prostate cancer	6	8777463	0.0096	0.1854	GCST90274787	6	8777463	0.0148	5.1e-06	Fibroblast growth factor 19 levels	0.00167334	1.27e-05	6.61e-05	0.00171586	21.3304	40.9189	20.801
rs516246	T	C	T	C	-0.1661	0.0088	0.445	0.4609	Prostate cancer	19	49206172	0.0082	0.2817	GCST90274787	19	49206172	0.0118	5.31e-45	Fibroblast growth factor 19 levels	0.0132624	8.21e-06	8.38e-39	0.0136277	203.675	40.9189	198.141
rs7005978	A	G	A	G	-0.1055	0.0019	0.3458	0.3479	Prostate cancer	8	59382715	0.0085	0.8195	GCST90274787	8	59382715	0.0123	9.72e-18	Fibroblast growth factor 19 levels	0.00496565	3.56e-07	6.31e-16	0.00503582	74.6138	40.9189	73.569
rs73775566	A	T	A	T	0.107	0.0385	0.0677	0.0645	Prostate cancer	6	139960701	0.0168	0.0215799	GCST90274787	6	139960701	0.024	8.26e-06	Fibroblast growth factor 19 levels	0.00134713	3.74e-05	0.000410186	0.00144525	21.3265	40.9189	19.8767
rs75715636	A	G	A	G	0.0838	0.0091	0.1237	0.1162	Prostate cancer	3	7913293	0.0129	0.4801	GCST90274787	3	7913293	0.0187	7.42e-06	Fibroblast growth factor 19 levels	0.00140295	3.55e-06	5.05e-05	0.00152244	21.795	40.9189	20.0819
rs76708593	T	C	T	C	0.1024	0.0142	0.9158	0.9222	Prostate cancer	12	108147245	0.0156	0.3648	GCST90274787	12	108147245	0.0222	3.98e-06	Fibroblast growth factor 19 levels	0.00148626	5.91e-06	3.85e-05	0.00161712	23.1526	40.9189	21.2762
rs79110990	A	G	A	G	0.073	0.0016	0.1762	0.1694	Prostate cancer	9	18148302	0.0109	0.8808	GCST90274787	9	18148302	0.0156	2.88e-06	Fibroblast growth factor 19 levels	0.00152971	1.54e-07	1.02e-05	0.00154705	22.1462	40.9189	21.8976
rs80023023	A	G	A	G	-0.2706	-0.0204	0.0119	0.0091	Prostate cancer	12	20656675	0.0452	0.651499	GCST90274787	12	20656675	0.0607	8.27e-06	Fibroblast growth factor 19 levels	0.00153431	1.45e-06	3.58e-05	0.001722	22.3091	40.9189	19.8737
rs834971	A	G	A	G	-0.0614	-0.0006	0.3002	0.2916	Prostate cancer	1	100098055	0.0095	0.9527	GCST90274787	1	100098055	0.0128	1.61e-06	Fibroblast growth factor 19 levels	0.0015601	2.84e-08	5.56e-06	0.00158399	23.3628	40.9189	23.01
rs10495032	T	G	T	G	-0.1557	0.0154	0.0383	0.0444	Prostate cancer	1	216837226	0.0197	0.4361	GCST90274788	1	216837226	0.0318	9.77e-07	Fibroblast growth factor 21 levels	0.00162618	4.36e-06	1.01e-05	0.00178585	26.3312	40.9189	23.973
rs12290350	T	C	T	C	-0.0689	0.0084	0.2168	0.2152	Prostate cancer	11	76480255	0.0098	0.3923	GCST90274788	11	76480255	0.0145	2.02e-06	Fibroblast growth factor 21 levels	0.00157723	5.24e-06	2e-05	0.00161213	23.0794	40.9189	22.5789
rs12532101	T	C	T	C	0.0659	0.0082	0.203	0.1966	Prostate cancer	7	1194526	0.0102	0.421	GCST90274788	7	1194526	0.0149	9.74e-06	Fibroblast growth factor 21 levels	0.00136672	4.61e-06	7.25e-05	0.00140526	20.1136	40.9189	19.5613
rs1260326	T	C	T	C	0.1323	0.0222	0.3977	0.3944	Prostate cancer	2	27730940	0.0082	0.00657007	GCST90274788	2	27730940	0.0119	1.03e-28	Fibroblast growth factor 21 levels	0.00832247	5.23e-05	2.32e-22	0.00838529	124.543	40.9189	123.602
rs12691469	T	C	T	C	-0.0541	-0.0167	0.6149	0.6155	Prostate cancer	1	188409389	0.0085	0.0486295	GCST90274788	1	188409389	0.0122	9.23e-06	Fibroblast growth factor 21 levels	0.0013739	2.75e-05	0.000288044	0.00138612	19.8394	40.9189	19.6641
rs13062487	A	G	A	G	0.0571	-0.0013	0.3387	0.3302	Prostate cancer	3	71944243	0.0088	0.8777	GCST90274788	3	71944243	0.0126	5.85e-06	Fibroblast growth factor 21 levels	0.00143478	1.56e-07	1.95e-05	0.00146055	20.9062	40.9189	20.5367
rs13229619	A	G	A	G	-0.1609	-0.0239	0.1297	0.1188	Prostate cancer	7	73030175	0.0134	0.0748101	GCST90274788	7	73030175	0.0176	6.13e-20	Fibroblast growth factor 21 levels	0.00563773	2.27e-05	4.02e-16	0.00584455	86.661	40.9189	83.577
rs142603673	T	C	T	C	-0.2352	-0.0084	0.0232	0.0218	Prostate cancer	21	33860969	0.0289	0.7701	GCST90274788	21	33860969	0.0455	2.35e-07	Fibroblast growth factor 21 levels	0.00187164	6.02e-07	1.33e-06	0.00250725	35.8182	40.9189	26.7209
rs145127946	A	G	A	G	-0.1747	-0.0779	0.037	0.032	Prostate cancer	1	203746507	0.0285	0.00618301	GCST90274788	1	203746507	0.036	1.22e-06	Fibroblast growth factor 21 levels	0.00164491	5.33e-05	0.000150461	0.00217492	31.1539	40.9189	23.5495
rs149561599	T	G	T	G	0.1978	0.0111	0.9786	0.9796	Prostate cancer	22	20883740	0.0323	0.7305	GCST90274788	22	20883740	0.0444	8.39e-06	Fibroblast growth factor 21 levels	0.00142917	8.42e-07	3.39e-05	0.00163871	22.7613	40.9189	19.8466
rs17284047	T	C	T	C	-0.2149	-0.0387	0.9794	0.987	Prostate cancer	3	100519020	0.0388	0.318	GCST90274788	3	100519020	0.0479	7.24e-06	Fibroblast growth factor 21 levels	0.00136359	7.09e-06	7.52e-05	0.0018635	27.5212	40.9189	20.1281
rs188758663	A	G	A	G	-0.3801	-0.0006	0.0104	0.0066	Prostate cancer	10	127847758	0.0625	0.9922	GCST90274788	10	127847758	0.0749	3.88e-07	Fibroblast growth factor 21 levels	0.00220268	6.57e-10	1.11e-06	0.00297385	34.7964	40.9189	25.7533
rs2429473	A	C	A	C	-0.0812	-0.0074	0.795	0.8072	Prostate cancer	12	47198899	0.0101	0.4639	GCST90274788	12	47198899	0.0147	3.32e-08	Fibroblast growth factor 21 levels	0.00213024	3.83e-06	4.72e-07	0.00214913	30.7837	40.9189	30.5125
rs35852631	C	G	C	G	-0.0608	0.0043	0.2555	0.2504	Prostate cancer	5	107955452	0.0095	0.649101	GCST90274788	5	107955452	0.0135	6.68e-06	Fibroblast growth factor 21 levels	0.0013753	1.46e-06	3.42e-05	0.00140635	20.7419	40.9189	20.2833
rs4700382	T	C	T	C	-0.063	0.0008	0.2698	0.2638	Prostate cancer	5	55882435	0.0096	0.9361	GCST90274788	5	55882435	0.0136	3.62e-06	Fibroblast growth factor 21 levels	0.00149909	4.95e-08	1.15e-05	0.00156385	22.3871	40.9189	21.4587
rs574044675	A	C	A	C	-0.1822	-0.0048	0.9712	0.9715	Prostate cancer	3	172274232	0.0252	0.8503	GCST90274788	3	172274232	0.0406	7.2e-06	Fibroblast growth factor 21 levels	0.00152581	2.59e-07	2.3e-05	0.00185707	24.5198	40.9189	20.1393
rs60277384	T	C	T	C	-0.0881	-0.012	0.8922	0.8912	Prostate cancer	5	84356011	0.013	0.3573	GCST90274788	5	84356011	0.019	3.54e-06	Fibroblast growth factor 21 levels	0.00145651	6.08e-06	3.71e-05	0.00149301	22.0399	40.9189	21.5003
rs7012637	A	G	A	G	-0.0605	0.0209	0.4812	0.4694	Prostate cancer	8	9173209	0.0083	0.01187	GCST90274788	8	9173209	0.012	4.61e-07	Fibroblast growth factor 21 levels	0.00177522	4.52e-05	5.45e-05	0.00182754	26.1688	40.9189	25.4184
rs72965996	A	G	A	G	-0.2215	-0.0455	0.031	0.0146	Prostate cancer	18	72826607	0.0423	0.2821	GCST90274788	18	72826607	0.0444	6.08e-07	Fibroblast growth factor 21 levels	0.00179942	8.25e-06	9.15e-06	0.00294756	40.8143	40.9189	24.8875
rs7442192	A	G	A	G	0.0619	-0.0051	0.7357	0.7461	Prostate cancer	4	45023201	0.0097	0.5971	GCST90274788	4	45023201	0.0138	7.27e-06	Fibroblast growth factor 21 levels	0.00140569	1.97e-06	3.92e-05	0.00149008	21.3295	40.9189	20.1198
rs7610704	T	C	T	C	-0.0568	0.0081	0.4644	0.4667	Prostate cancer	3	11689679	0.0084	0.3334	GCST90274788	3	11689679	0.012	2.21e-06	Fibroblast growth factor 21 levels	0.00156506	6.63e-06	2.5e-05	0.00160494	22.9763	40.9189	22.4044
rs79789860	T	C	T	C	-0.2003	0.0094	0.0209	0.0211	Prostate cancer	7	114309511	0.0312	0.7641	GCST90274788	7	114309511	0.0448	7.79e-06	Fibroblast growth factor 21 levels	0.00135551	6.47e-07	3.19e-05	0.00164197	24.2211	40.9189	19.9897
rs8191009	A	G	A	G	0.0678	-0.0025	0.1998	0.2007	Prostate cancer	8	30545827	0.0106	0.8098	GCST90274788	8	30545827	0.0151	7.12e-06	Fibroblast growth factor 21 levels	0.00140854	3.97e-07	2.62e-05	0.00146988	21.04	40.9189	20.1607
rs9974115	A	C	A	C	0.0758	-0.0005	0.8308	0.8333	Prostate cancer	21	37867322	0.0115	0.9625	GCST90274788	21	37867322	0.0169	7.28e-06	Fibroblast growth factor 21 levels	0.0014055	1.35e-08	2.06e-05	0.00161535	23.1255	40.9189	20.1171
rs11150539	T	C	T	C	-0.056	-0.0002	0.4938	0.4935	Prostate cancer	16	83137317	0.0085	0.9803	GCST90274789	16	83137317	0.0119	2.53e-06	Fibroblast growth factor 23 levels	0.00154785	3.95e-09	7.65e-06	0.00156776	22.4306	40.9189	22.1453
rs117963256	A	T	A	T	-0.291	-0.0278	0.0117	0.0103	Prostate cancer	8	19386357	0.0418	0.5054	GCST90274789	8	19386357	0.0653	8.34e-06	Fibroblast growth factor 23 levels	0.0016117	3.15e-06	4.45e-05	0.00195835	24.1389	40.9189	19.8591
rs118177380	A	G	A	G	0.2362	0.0076	0.0187	0.0156	Prostate cancer	11	106531034	0.039	0.8449	GCST90274789	11	106531034	0.0507	3.18e-06	Fibroblast growth factor 23 levels	0.00151706	2.71e-07	1.2e-05	0.00204754	29.3092	40.9189	21.7042
rs11930290	A	T	A	T	-0.1845	-0.003	0.9748	0.9775	Prostate cancer	4	124325226	0.0281	0.9144	GCST90274789	4	124325226	0.0389	2.11e-06	Fibroblast growth factor 23 levels	0.0017481	8.13e-08	6.57e-06	0.00167239	21.5196	40.9189	22.4954
rs138865481	A	G	A	G	-0.2386	0.0423	0.0154	0.0135	Prostate cancer	1	205812500	0.036	0.2393	GCST90274789	1	205812500	0.0534	7.89e-06	Fibroblast growth factor 23 levels	0.00144482	9.84e-06	9.21e-05	0.00172644	23.8626	40.9189	19.9645
rs145628723	A	G	A	G	0.1957	0.0321	0.022	0.0161	Prostate cancer	13	103962376	0.0391	0.4114	GCST90274789	13	103962376	0.0437	7.53e-06	Fibroblast growth factor 23 levels	0.00140676	4.81e-06	5.9e-05	0.00164806	23.5005	40.9189	20.0548
rs2825747	A	G	A	G	0.0693	-0.0266	0.8386	0.8414	Prostate cancer	21	21059864	0.0114	0.0200101	GCST90274789	21	21059864	0.0153	5.91e-06	Fibroblast growth factor 23 levels	0.00139055	3.88e-05	0.000332925	0.00130003	19.1783	40.9189	20.5156
rs33921462	A	G	A	G	-0.0653	-0.0051	0.2766	0.2683	Prostate cancer	5	176814656	0.0097	0.5988	GCST90274789	5	176814656	0.0135	1.32e-06	Fibroblast growth factor 23 levels	0.00163519	1.97e-06	8.72e-06	0.00170642	24.4179	40.9189	23.3969
rs34551523	A	G	A	G	0.1704	0.0242	0.0295	0.0291	Prostate cancer	5	146629145	0.0257	0.3455	GCST90274789	5	146629145	0.0348	9.75e-07	Fibroblast growth factor 23 levels	0.00162529	6.32e-06	1.26e-05	0.0016626	24.5275	40.9189	23.9762
rs370203222	C	G	C	G	0.1059	-0.0078	0.1002	0.1011	Prostate cancer	7	12540548	0.0137	0.5683	GCST90274789	7	12540548	0.0222	1.84e-06	Fibroblast growth factor 23 levels	0.00193174	2.31e-06	9.77e-06	0.00202225	23.8238	40.9189	22.7555
rs3811621	C	G	C	G	0.1163	0.0044	0.2897	0.2674	Prostate cancer	2	190446541	0.0097	0.6514	GCST90274789	2	190446541	0.0131	6.82e-19	Fibroblast growth factor 23 levels	0.00548753	1.47e-06	9.44e-17	0.00556647	79.9565	40.9189	78.8164
rs4730018	A	C	A	C	0.0936	-0.0103	0.9039	0.9029	Prostate cancer	7	104141309	0.015	0.4911	GCST90274789	7	104141309	0.0206	5.53e-06	Fibroblast growth factor 23 levels	0.00144314	3.36e-06	3.81e-05	0.00152204	21.7755	40.9189	20.6451
rs4958089	T	C	T	C	0.0513	0.01	0.4217	0.4288	Prostate cancer	5	132484429	0.0086	0.2415	GCST90274789	5	132484429	0.0115	8.16e-06	Fibroblast growth factor 23 levels	0.00134884	9.64e-06	0.000102767	0.00128358	18.9352	40.9189	19.8994
rs6127099	A	T	A	T	0.0907	-0.0068	0.706	0.715	Prostate cancer	20	52731402	0.0092	0.4571	GCST90274789	20	52731402	0.0134	1.3e-11	Fibroblast growth factor 23 levels	0.00319694	3.9e-06	4.98e-10	0.00341505	48.9511	40.9189	45.8147
rs62307586	T	G	T	G	-0.0552	0.0109	0.2859	0.2917	Prostate cancer	4	61224008	0.0089	0.2226	GCST90274789	4	61224008	0.0124	8.52e-06	Fibroblast growth factor 23 levels	0.00134326	1.07e-05	0.000115224	0.00124417	18.3533	40.9189	19.8169
rs671205	T	C	T	C	0.0708	0.0004	0.7502	0.7615	Prostate cancer	1	146522722	0.0099	0.9698	GCST90274789	1	146522722	0.0136	1.93e-07	Fibroblast growth factor 23 levels	0.00189359	1.16e-08	7.6e-07	0.00187874	26.8883	40.9189	27.1012
rs6753743	T	G	T	G	0.0941	-0.0007	0.8733	0.8879	Prostate cancer	2	121962947	0.0131	0.9585	GCST90274789	2	121962947	0.0185	3.65e-07	Fibroblast growth factor 23 levels	0.00180788	2.04e-08	1.38e-06	0.00195952	28.0467	40.9189	25.8723
rs72720704	T	C	T	C	0.0725	-0.0136	0.8402	0.8437	Prostate cancer	1	176974037	0.0112	0.2242	GCST90274789	1	176974037	0.0161	6.7e-06	Fibroblast growth factor 23 levels	0.00141752	1.05e-05	8.87e-05	0.00141145	20.1911	40.9189	20.278
rs794007	T	C	T	C	0.0685	0.0015	0.2406	0.2307	Prostate cancer	4	40142535	0.0095	0.8729	GCST90274789	4	40142535	0.0144	1.97e-06	Fibroblast growth factor 23 levels	0.00175897	1.78e-07	6.61e-06	0.00171466	22.0575	40.9189	22.6285
rs7955866	A	G	A	G	-0.0959	-0.021	0.1141	0.1142	Prostate cancer	12	4479549	0.0126	0.0962698	GCST90274789	12	4479549	0.0178	7.14e-08	Fibroblast growth factor 23 levels	0.00196844	1.98e-05	4.03e-06	0.00185925	27.4135	40.9189	29.0267
rs9859317	A	G	A	G	-0.0549	-0.0065	0.3489	0.3583	Prostate cancer	3	64683150	0.009	0.4685	GCST90274789	3	64683150	0.0124	9.54e-06	Fibroblast growth factor 23 levels	0.00137033	3.72e-06	6.41e-05	0.00136938	19.5884	40.9189	19.602
rs9950230	C	G	C	G	-0.0559	-0.0119	0.7034	0.7049	Prostate cancer	18	56254394	0.0093	0.2023	GCST90274789	18	56254394	0.0123	5.5e-06	Fibroblast growth factor 23 levels	0.00140081	1.17e-05	8.57e-05	0.00130385	19.2229	40.9189	20.6544
rs112790107	A	G	A	G	0.509	0.0483	0.006	0.0078	Prostate cancer	12	48680454	0.0487	0.3215	GCST90274790	12	48680454	0.1062	1.64e-06	Fibroblast growth factor 5 levels	0.00232834	7.01e-06	1.2e-05	0.00309032	30.5123	40.9189	22.9714
rs305897	T	C	T	C	0.1185	0.0265	0.0828	0.0795	Prostate cancer	6	39710570	0.0152	0.0821902	GCST90274790	6	39710570	0.0249	1.95e-06	Fibroblast growth factor 5 levels	0.00199341	2.17e-05	4.15e-05	0.00213285	24.2361	40.9189	22.6484
rs36034102	T	G	T	G	0.497	-0.0055	0.273	0.2686	Prostate cancer	4	81202048	0.01	0.5798	GCST90274790	4	81202048	0.0143	1.15e-264	Fibroblast growth factor 5 levels	0.0962727	2.16e-06	1.07e-234	0.0980482	1232.63	40.9189	1207.93
rs56391958	A	G	A	G	-0.1197	0.0093	0.0816	0.0851	Prostate cancer	16	62005709	0.0158	0.5586	GCST90274790	16	62005709	0.0249	1.53e-06	Fibroblast growth factor 5 levels	0.0020339	2.47e-06	8.15e-06	0.00214753	24.4033	40.9189	23.1094
rs75936934	A	G	A	G	-0.3522	-0.0574	0.0174	0.014	Prostate cancer	4	81544248	0.0432	0.1832	GCST90274790	4	81544248	0.0524	1.8e-11	Fibroblast growth factor 5 levels	0.00398203	1.26e-05	1.07e-09	0.00424165	48.1348	40.9189	45.1769
rs10164255	T	G	T	G	0.0556	0.0004	0.408	0.3957	Prostate cancer	18	70532840	0.0092	0.9643	GCST90274791	18	70532840	0.0121	4.33e-06	Fms-related tyrosine kinase 3 ligand levels	0.00143167	1.35e-08	1.32e-05	0.00149335	22.0254	40.9189	21.1144
rs11212636	A	G	A	G	-0.0772	0.0241	0.4171	0.4134	Prostate cancer	11	108311965	0.008	0.002651	GCST90274791	11	108311965	0.0117	4.16e-11	Fms-related tyrosine kinase 3 ligand levels	0.00294878	6.47e-05	9.02e-08	0.002898	42.7855	40.9189	43.5374
rs112538528	A	C	A	C	-0.2426	0.0965	0.9835	0.9902	Prostate cancer	1	236377861	0.0487	0.0476903	GCST90274791	1	236377861	0.0547	9.2e-06	Fms-related tyrosine kinase 3 ligand levels	0.00147644	2.8e-05	0.000257949	0.00191016	25.4595	40.9189	19.6701
rs113877570	A	G	A	G	-0.1207	-0.0011	0.0513	0.0502	Prostate cancer	2	36270546	0.0188	0.9546	GCST90274791	2	36270546	0.0266	5.69e-06	Fms-related tyrosine kinase 3 ligand levels	0.00139614	2.44e-08	1.73e-05	0.00141805	20.9132	40.9189	20.5898
rs117040659	T	C	T	C	0.3667	0.0571	0.0086	0.0065	Prostate cancer	8	29348124	0.0598	0.3398	GCST90274791	8	29348124	0.0815	6.81e-06	Fms-related tyrosine kinase 3 ligand levels	0.00141528	6.5e-06	6.47e-05	0.00229297	32.8281	40.9189	20.2445
rs11961049	A	G	A	G	0.1031	0.0074	0.0686	0.067	Prostate cancer	6	155496339	0.0174	0.669	GCST90274791	6	155496339	0.0232	8.83e-06	Fms-related tyrosine kinase 3 ligand levels	0.00133965	1.29e-06	4.21e-05	0.00135834	20.0246	40.9189	19.7488
rs12338549	T	C	T	C	-0.0851	-0.004	0.1096	0.1075	Prostate cancer	9	94348687	0.0133	0.7619	GCST90274791	9	94348687	0.0186	4.76e-06	Fms-related tyrosine kinase 3 ligand levels	0.00142035	6.45e-07	2.06e-05	0.00141346	20.8314	40.9189	20.9331
rs12609918	A	G	A	G	-0.1863	-0.0052	0.9451	0.9335	Prostate cancer	19	56755467	0.0221	0.8136	GCST90274791	19	56755467	0.0412	6.13e-06	Fms-related tyrosine kinase 3 ligand levels	0.00215881	3.95e-07	1.59e-05	0.00360169	34.1626	40.9189	20.4471
rs1379304	T	C	T	C	0.0603	0.0015	0.3741	0.3723	Prostate cancer	5	6289394	0.0096	0.8732	GCST90274791	5	6289394	0.0127	2.05e-06	Fms-related tyrosine kinase 3 ligand levels	0.00157577	1.74e-07	7.66e-06	0.00170277	24.3639	40.9189	22.5438
rs141117375	T	C	T	C	-0.1519	-0.0414	0.0364	0.0316	Prostate cancer	11	62294309	0.0266	0.1202	GCST90274791	11	62294309	0.0331	4.45e-06	Fms-related tyrosine kinase 3 ligand levels	0.00147221	1.73e-05	9.72e-05	0.00161862	23.1578	40.9189	21.0601
rs142870956	T	C	T	C	-0.4307	-0.0593	0.0075	0.0071	Prostate cancer	20	4261712	0.0665	0.3724	GCST90274791	20	4261712	0.0883	1.07e-06	Fms-related tyrosine kinase 3 ligand levels	0.00198699	5.67e-06	9.39e-06	0.00276167	33.0933	40.9189	23.7919
rs144317085	A	T	A	T	0.2206	-0.0268	0.9647	0.9622	Prostate cancer	4	105806108	0.0214	0.2107	GCST90274791	4	105806108	0.0324	9.85e-12	Fms-related tyrosine kinase 3 ligand levels	0.00313941	1.12e-05	1.15e-09	0.00331442	48.9506	40.9189	46.3576
rs17272847	A	G	A	G	0.1179	-0.04	0.0907	0.0848	Prostate cancer	19	49979398	0.0166	0.01556	GCST90274791	19	49979398	0.022	8.36e-08	Fms-related tyrosine kinase 3 ligand levels	0.00216775	4.14e-05	1.02e-05	0.00229283	30.3809	40.9189	28.7199
rs184038883	A	C	A	C	-0.2276	0.0642	0.0242	0.0131	Prostate cancer	4	185989605	0.0423	0.1293	GCST90274791	4	185989605	0.0504	6.31e-06	Fms-related tyrosine kinase 3 ligand levels	0.00159217	1.64e-05	0.000103145	0.00244653	31.363	40.9189	20.3931
rs185979634	T	C	T	C	0.1483	-0.0009	0.9513	0.9547	Prostate cancer	10	101403323	0.0202	0.9663	GCST90274791	10	101403323	0.0306	1.26e-06	Fms-related tyrosine kinase 3 ligand levels	0.00182521	1.42e-08	3.76e-06	0.00203779	26.2288	40.9189	23.4876
rs1866051	T	C	T	C	-0.0746	0.003	0.4771	0.4861	Prostate cancer	2	65602149	0.008	0.7083	GCST90274791	2	65602149	0.0115	8.76e-11	Fms-related tyrosine kinase 3 ligand levels	0.00284866	1e-06	1.43e-09	0.00277674	41.0153	40.9189	42.0806
rs186975	C	G	C	G	0.0554	0.0023	0.382	0.3805	Prostate cancer	2	8442736	0.0082	0.781	GCST90274791	2	8442736	0.0119	3.23e-06	Fms-related tyrosine kinase 3 ligand levels	0.00147211	5.61e-07	1.42e-05	0.00144911	21.3343	40.9189	21.6733
rs192857133	T	C	T	C	0.1812	-0.0192	0.026	0.0263	Prostate cancer	9	243950	0.0268	0.4737	GCST90274791	9	243950	0.0386	2.68e-06	Fms-related tyrosine kinase 3 ligand levels	0.0014943	3.66e-06	2.2e-05	0.00166295	24.5277	40.9189	22.0365
rs218265	T	C	T	C	0.0833	0.0043	0.8361	0.8312	Prostate cancer	4	55408999	0.0115	0.710699	GCST90274791	4	55408999	0.016	1.93e-07	Fms-related tyrosine kinase 3 ligand levels	0.00183687	9.97e-07	1.33e-06	0.00190177	28.0645	40.9189	27.105
rs2325555	A	G	A	G	-0.0653	-0.0149	0.8002	0.801	Prostate cancer	13	74312013	0.0105	0.1558	GCST90274791	13	74312013	0.0146	7.73e-06	Fms-related tyrosine kinase 3 ligand levels	0.00135732	1.44e-05	0.000135349	0.00136349	20.0952	40.9189	20.0042
rs35340580	A	G	A	G	-0.1383	-0.015	0.0449	0.0422	Prostate cancer	16	1526820	0.0207	0.4692	GCST90274791	16	1526820	0.0303	5.01e-06	Fms-related tyrosine kinase 3 ligand levels	0.00152381	3.74e-06	3.47e-05	0.00164047	22.4309	40.9189	20.8333
rs35977476	C	G	C	G	0.1102	0.0183	0.0668	0.0591	Prostate cancer	9	9191493	0.0183	0.3169	GCST90274791	9	9191493	0.0244	6.29e-06	Fms-related tyrosine kinase 3 ligand levels	0.00138352	7.13e-06	6.69e-05	0.00151406	22.3254	40.9189	20.3978
rs374309	A	G	A	G	0.0786	-0.011	0.8629	0.8713	Prostate cancer	19	22332298	0.012	0.3605	GCST90274791	19	22332298	0.0174	6.27e-06	Fms-related tyrosine kinase 3 ligand levels	0.00142652	5.99e-06	5.73e-05	0.00146175	20.9102	40.9189	20.4055
rs4919613	A	G	A	G	-0.0662	0.0018	0.1973	0.1905	Prostate cancer	10	103905779	0.0102	0.8612	GCST90274791	10	103905779	0.0148	7.71e-06	Fms-related tyrosine kinase 3 ligand levels	0.00139873	2.22e-07	2.59e-05	0.00138812	19.8554	40.9189	20.0075
rs550294336	T	G	T	G	0.1081	0.0013	0.8252	0.8261	Prostate cancer	4	8477441	0.0141	0.9286	GCST90274791	4	8477441	0.0238	5.57e-06	Fms-related tyrosine kinase 3 ligand levels	0.0020947	6.06e-08	1.27e-05	0.00337118	33.244	40.9189	20.6299
rs55646869	A	G	A	G	0.0529	-0.0073	0.4437	0.4368	Prostate cancer	9	129753010	0.0081	0.3695	GCST90274791	9	129753010	0.0116	5.11e-06	Fms-related tyrosine kinase 3 ligand levels	0.00141265	5.79e-06	4.91e-05	0.00138146	20.337	40.9189	20.7967
rs57191857	A	G	A	G	-0.1429	-0.0477	0.9571	0.9583	Prostate cancer	9	10640144	0.0206	0.02069	GCST90274791	9	10640144	0.0299	1.76e-06	Fms-related tyrosine kinase 3 ligand levels	0.00154806	3.82e-05	0.00012749	0.00167691	24.7457	40.9189	22.8414
rs61792394	A	G	A	G	-0.1569	0.0452	0.9624	0.969	Prostate cancer	3	170851052	0.0284	0.112	GCST90274791	3	170851052	0.0338	3.45e-06	Fms-related tyrosine kinase 3 ligand levels	0.00150629	1.81e-05	8.24e-05	0.00178164	25.4943	40.9189	21.5483
rs6453962	T	C	T	C	-0.0559	-0.0013	0.4699	0.4735	Prostate cancer	6	77907355	0.0081	0.8753	GCST90274791	6	77907355	0.0117	1.77e-06	Fms-related tyrosine kinase 3 ligand levels	0.00154731	1.84e-07	6.98e-06	0.00155674	22.9666	40.9189	22.8272
rs67811337	A	C	A	C	0.1083	-0.0035	0.081	0.078	Prostate cancer	1	6546418	0.0172	0.841	GCST90274791	1	6546418	0.024	6.41e-06	Fms-related tyrosine kinase 3 ligand levels	0.00153792	2.95e-07	2.11e-05	0.00174617	23.1248	40.9189	20.3627
rs6925032	A	C	A	C	0.0676	0.0073	0.326	0.3273	Prostate cancer	6	91008027	0.0086	0.3972	GCST90274791	6	91008027	0.0128	1.28e-07	Fms-related tyrosine kinase 3 ligand levels	0.00194884	5.14e-06	1.83e-06	0.00200817	28.7424	40.9189	27.8916
rs72681653	A	G	A	G	0.1302	-0.0072	0.9447	0.9528	Prostate cancer	14	51156734	0.0207	0.728799	GCST90274791	14	51156734	0.0266	9.84e-07	Fms-related tyrosine kinase 3 ligand levels	0.00162365	8.63e-07	5.42e-06	0.00177121	26.1398	40.9189	23.9584
rs73000965	A	T	A	T	0.0588	-0.0171	0.3111	0.3105	Prostate cancer	11	113982321	0.0088	0.0511505	GCST90274791	11	113982321	0.0125	2.55e-06	Fms-related tyrosine kinase 3 ligand levels	0.00150006	2.69e-05	0.000106796	0.00148197	21.8604	40.9189	22.1276
rs74722523	T	C	T	C	0.3529	0.0053	0.9914	0.9909	Prostate cancer	10	105351013	0.0452	0.9059	GCST90274791	10	105351013	0.076	3.43e-06	Fms-related tyrosine kinase 3 ligand levels	0.00188201	9.8e-08	9.37e-06	0.00212364	24.3355	40.9189	21.5614
rs7624160	T	G	T	G	-0.1061	-0.0208	0.6093	0.6156	Prostate cancer	3	128381886	0.0083	0.0122501	GCST90274791	3	128381886	0.0119	4.84e-19	Fms-related tyrosine kinase 3 ligand levels	0.00537252	4.48e-05	1.34e-14	0.00535964	79.3028	40.9189	79.4945
rs76428106	T	C	T	C	-1.1019	-0.0406	0.9832	0.9865	Prostate cancer	13	28604007	0.0415	0.3288	GCST90274791	13	28604007	0.0524	3.59e-98	Fms-related tyrosine kinase 3 ligand levels	0.0310553	6.82e-06	4.24e-86	0.0401112	576.54	40.9189	442.203
rs77584520	A	T	A	T	0.1313	0.0211	0.9568	0.9611	Prostate cancer	1	78494817	0.0211	0.3165	GCST90274791	1	78494817	0.0293	7.42e-06	Fms-related tyrosine kinase 3 ligand levels	0.00136154	7.13e-06	7.7e-05	0.00142516	21.0212	40.9189	20.0814
rs78429945	T	G	T	G	0.0884	-0.0076	0.1818	0.1894	Prostate cancer	20	30439298	0.0106	0.4775	GCST90274791	20	30439298	0.016	3.29e-08	Fms-related tyrosine kinase 3 ligand levels	0.00213249	3.67e-06	4.57e-07	0.00232481	33.285	40.9189	30.5256
rs78723322	T	C	T	C	-0.1487	0.0437	0.0403	0.0329	Prostate cancer	14	87871738	0.023	0.05767	GCST90274791	14	87871738	0.0329	6.19e-06	Fms-related tyrosine kinase 3 ligand levels	0.00138474	2.57e-05	0.000205071	0.00171038	25.2405	40.9189	20.4282
rs9381118	T	C	T	C	0.0643	-0.0163	0.2577	0.2578	Prostate cancer	6	41985436	0.0092	0.0751796	GCST90274791	6	41985436	0.0136	2.27e-06	Fms-related tyrosine kinase 3 ligand levels	0.00156259	2.24e-05	7.36e-05	0.00158178	22.6283	40.9189	22.3534
rs9554186	A	T	A	T	0.0821	-0.0062	0.3602	0.3489	Prostate cancer	13	28455266	0.009	0.4935	GCST90274791	13	28455266	0.0128	1.42e-10	Fms-related tyrosine kinase 3 ligand levels	0.00287189	3.38e-06	3.68e-09	0.00310673	44.5149	40.9189	41.1402
rs10982156	A	T	A	T	-0.1073	-0.0259	0.0803	0.0601	Prostate cancer	9	117088064	0.0201	0.1992	GCST90274792	9	117088064	0.0236	5.45e-06	Glial cell line-derived neurotrophic factor levels	0.0014449	1.18e-05	8.2e-05	0.00170056	24.3355	40.9189	20.6717
rs112594435	T	C	T	C	0.1531	-0.0162	0.0371	0.0249	Prostate cancer	6	134688249	0.0291	0.5777	GCST90274792	6	134688249	0.0333	4.27e-06	Glial cell line-derived neurotrophic factor levels	0.00143404	2.21e-06	2.66e-05	0.00167469	24.6912	40.9189	21.1379
rs116928328	T	C	T	C	0.3727	0.0192	0.9927	0.9927	Prostate cancer	21	38984857	0.0532	0.718199	GCST90274792	21	38984857	0.0821	5.64e-06	Glial cell line-derived neurotrophic factor levels	0.0014912	9.29e-07	2.42e-05	0.00201321	27.8364	40.9189	20.6078
rs117195704	A	G	A	G	-0.1377	0.0129	0.0386	0.0332	Prostate cancer	10	61379709	0.0235	0.5817	GCST90274792	10	61379709	0.0309	8.34e-06	Glial cell line-derived neurotrophic factor levels	0.00134719	2.15e-06	4.72e-05	0.00140731	20.7462	40.9189	19.8587
rs11740708	A	G	A	G	-0.3888	-0.0244	0.0906	0.0914	Prostate cancer	5	37868088	0.0141	0.0830004	GCST90274792	5	37868088	0.0198	7.56e-86	Glial cell line-derived neurotrophic factor levels	0.0255464	2.14e-05	5.81e-73	0.0249095	375.729	40.9189	385.587
rs138691533	A	G	A	G	0.2584	0.1094	0.0148	0.0121	Prostate cancer	12	98629454	0.0457	0.0167402	GCST90274792	12	98629454	0.0539	1.63e-06	Glial cell line-derived neurotrophic factor levels	0.00155796	4.09e-05	0.000132759	0.00194716	28.7356	40.9189	22.983
rs141731127	T	C	T	C	-0.1315	0.0256	0.9185	0.9283	Prostate cancer	10	17966958	0.0204	0.2089	GCST90274792	10	17966958	0.0295	8.29e-06	Glial cell line-derived neurotrophic factor levels	0.00160558	1.12e-05	9.04e-05	0.00258892	32.0717	40.9189	19.8704
rs144181640	A	T	A	T	0.3366	0.0035	0.9898	0.9927	Prostate cancer	2	208746333	0.0567	0.9514	GCST90274792	2	208746333	0.0697	1.37e-06	Glial cell line-derived neurotrophic factor levels	0.00166474	2.72e-08	4.54e-06	0.00228774	32.0696	40.9189	23.3218
rs147483239	T	C	T	C	-0.2148	-0.0677	0.019	0.019	Prostate cancer	3	11787496	0.0373	0.0696402	GCST90274792	3	11787496	0.0485	9.47e-06	Glial cell line-derived neurotrophic factor levels	0.0013304	2.35e-05	0.000259465	0.00171997	25.3685	40.9189	19.6149
rs150807191	A	G	A	G	-0.1719	-0.0178	0.9717	0.9749	Prostate cancer	8	34985123	0.029	0.538801	GCST90274792	8	34985123	0.0387	8.92e-06	Glial cell line-derived neurotrophic factor levels	0.00133829	2.69e-06	5.45e-05	0.00162518	23.9664	40.9189	19.7301
rs16945776	A	G	A	G	0.0871	-0.0132	0.9042	0.9028	Prostate cancer	17	12160288	0.0148	0.3729	GCST90274792	17	12160288	0.0196	8.84e-06	Glial cell line-derived neurotrophic factor levels	0.00133896	5.67e-06	7.77e-05	0.0013143	19.3839	40.9189	19.748
rs17353853	A	G	A	G	0.1022	0.0054	0.9255	0.929	Prostate cancer	2	165822047	0.0159	0.7357	GCST90274792	2	165822047	0.0229	8.09e-06	Glial cell line-derived neurotrophic factor levels	0.00139224	8.22e-07	3.37e-05	0.00144034	20.6064	40.9189	19.9173
rs2093446	C	G	C	G	0.0606	-0.0135	0.3	0.3087	Prostate cancer	9	5230371	0.0089	0.1303	GCST90274792	9	5230371	0.0129	2.63e-06	Glial cell line-derived neurotrophic factor levels	0.00154236	1.64e-05	6e-05	0.00154239	22.0686	40.9189	22.0681
rs2194229	A	T	A	T	-0.1683	0.0059	0.1296	0.1302	Prostate cancer	5	37918839	0.0129	0.649201	GCST90274792	5	37918839	0.0179	5.34e-21	Glial cell line-derived neurotrophic factor levels	0.00614996	1.49e-06	1.27e-18	0.00639031	91.8791	40.9189	88.402
rs2453338	A	T	A	T	0.0829	0.0033	0.352	0.3565	Prostate cancer	5	38094871	0.0084	0.6927	GCST90274792	5	38094871	0.0124	2.3e-11	Glial cell line-derived neurotrophic factor levels	0.00302474	1.1e-06	4.51e-10	0.00313514	46.3321	40.9189	44.6957
rs35740453	A	G	A	G	-0.0718	-0.003	0.7373	0.7603	Prostate cancer	17	1490782	0.0121	0.8074	GCST90274792	17	1490782	0.0154	3.13e-06	Glial cell line-derived neurotrophic factor levels	0.00164133	4.38e-07	1.17e-05	0.00199702	26.4575	40.9189	21.7374
rs570043519	A	T	A	T	-0.3321	0.0045	0.02	0.0172	Prostate cancer	21	20242381	0.0455	0.9209	GCST90274792	21	20242381	0.0721	4.1e-06	Glial cell line-derived neurotrophic factor levels	0.00237578	6.97e-08	8.99e-06	0.00432338	38.6843	40.9189	21.2162
rs57104839	A	G	A	G	0.0915	0.01	0.903	0.9089	Prostate cancer	13	28147359	0.0154	0.5176	GCST90274792	13	28147359	0.0196	3.04e-06	Glial cell line-derived neurotrophic factor levels	0.00147696	3.01e-06	2.24e-05	0.00146667	21.6416	40.9189	21.7937
rs62243355	T	C	T	C	-0.0981	-0.0209	0.0997	0.1039	Prostate cancer	3	36072052	0.0131	0.11	GCST90274792	3	36072052	0.0196	5.58e-07	Glial cell line-derived neurotrophic factor levels	0.00169791	1.81e-05	1.97e-05	0.00172763	25.4903	40.9189	25.051
rs72743928	T	C	T	C	0.0871	0.0044	0.1091	0.0965	Prostate cancer	9	98815653	0.0147	0.766999	GCST90274792	9	98815653	0.0192	5.72e-06	Glial cell line-derived neurotrophic factor levels	0.00143846	6.39e-07	2.34e-05	0.00147475	21.0995	40.9189	20.5795
rs77124379	T	C	T	C	-0.1117	-0.0409	0.9259	0.9272	Prostate cancer	16	48955894	0.0167	0.0141599	GCST90274792	16	48955894	0.0245	5.14e-06	Glial cell line-derived neurotrophic factor levels	0.00145289	4.28e-05	0.000321239	0.00171206	24.5004	40.9189	20.7862
rs77671113	A	C	A	C	-0.1194	0.0018	0.0859	0.0838	Prostate cancer	10	87694408	0.015	0.9049	GCST90274792	10	87694408	0.0208	9.45e-09	Glial cell line-derived neurotrophic factor levels	0.00223313	1.03e-07	5.9e-08	0.00223885	33.0366	40.9189	32.952
rs79953230	T	C	T	C	0.1918	0.0501	0.0254	0.0197	Prostate cancer	13	67293674	0.0323	0.1205	GCST90274792	13	67293674	0.042	4.96e-06	Glial cell line-derived neurotrophic factor levels	0.00141503	1.72e-05	0.000110963	0.00182132	26.8533	40.9189	20.8544
rs9303102	T	G	T	G	0.2096	-0.0033	0.0231	0.021	Prostate cancer	17	14221290	0.036	0.9281	GCST90274792	17	14221290	0.0453	3.71e-06	Glial cell line-derived neurotrophic factor levels	0.0016526	5.99e-08	1.09e-05	0.00198278	25.6942	40.9189	21.4085
rs9409461	A	G	A	G	0.0528	0.0044	0.4811	0.4788	Prostate cancer	9	94530989	0.0087	0.6132	GCST90274792	9	94530989	0.0119	9.12e-06	Glial cell line-derived neurotrophic factor levels	0.00137615	1.82e-06	4.66e-05	0.00139193	19.9128	40.9189	19.6867
rs111239033	A	G	A	G	0.1021	-0.0303	0.0699	0.071	Prostate cancer	2	43842712	0.0156	0.0522601	GCST90274793	2	43842712	0.0228	7.53e-06	Hepatocyte growth factor levels	0.00135953	2.69e-05	0.000252136	0.00135546	19.9931	40.9189	20.0531
rs113903858	A	G	A	G	0.3666	-0.0025	0.014	0.0067	Prostate cancer	8	72362254	0.0617	0.9674	GCST90274793	8	72362254	0.0747	9.22e-07	Hepatocyte growth factor levels	0.00215832	1.17e-08	2.47e-06	0.00371039	41.4691	40.9189	24.0848
rs114581807	A	G	A	G	0.2031	0.0497	0.0214	0.0178	Prostate cancer	1	190171653	0.033	0.1315	GCST90274793	1	190171653	0.0452	7.01e-06	Hepatocyte growth factor levels	0.00136863	1.62e-05	0.000139503	0.0017277	25.4966	40.9189	20.1903
rs115009171	A	G	A	G	0.4297	-0.0821	0.0078	0.0063	Prostate cancer	6	622484	0.0618	0.1845	GCST90274793	6	622484	0.0934	4.21e-06	Hepatocyte growth factor levels	0.00205113	1.26e-05	4.29e-05	0.00285795	29.5155	40.9189	21.1659
rs11631440	A	T	A	T	-0.0638	0.0047	0.6021	0.5934	Prostate cancer	15	101649383	0.0087	0.5891	GCST90274793	15	101649383	0.012	1.06e-07	Hepatocyte growth factor levels	0.00191832	2.08e-06	1.01e-06	0.00195036	28.7399	40.9189	28.2669
rs138848271	T	C	T	C	-0.405	-0.007	0.9907	0.9938	Prostate cancer	1	83864840	0.0643	0.9137	GCST90274793	1	83864840	0.0832	1.13e-06	Hepatocyte growth factor levels	0.00219103	8.45e-08	3.17e-06	0.00302249	32.7146	40.9189	23.6954
rs144638564	A	G	A	G	-0.3746	-0.0304	0.0114	0.0088	Prostate cancer	12	114913966	0.0553	0.582599	GCST90274793	12	114913966	0.0839	8.01e-06	Hepatocyte growth factor levels	0.00165449	2.15e-06	3.64e-05	0.00316294	38.1677	40.9189	19.9348
rs145015846	T	C	T	C	0.2333	0.1058	0.0213	0.0162	Prostate cancer	14	24292539	0.0412	0.01013	GCST90274793	14	24292539	0.0525	8.84e-06	Hepatocyte growth factor levels	0.00138058	4.7e-05	0.000557167	0.00226928	32.4882	40.9189	19.7474
rs150498795	A	T	A	T	0.1566	0.0259	0.9642	0.9671	Prostate cancer	18	76506666	0.0228	0.2552	GCST90274793	18	76506666	0.0327	1.68e-06	Hepatocyte growth factor levels	0.00155457	9.2e-06	2.62e-05	0.00169303	24.9806	40.9189	22.9344
rs189111993	T	C	T	C	0.266	-0.0001	0.0183	0.0171	Prostate cancer	5	175563330	0.0374	0.9984	GCST90274793	5	175563330	0.0595	7.8e-06	Hepatocyte growth factor levels	0.00175317	5.1e-11	1.73e-05	0.00254228	29.0049	40.9189	19.9862
rs1963492	T	C	T	C	-0.0749	-0.0023	0.1917	0.1878	Prostate cancer	8	2653987	0.0106	0.8301	GCST90274793	8	2653987	0.0168	8.26e-06	Hepatocyte growth factor levels	0.00175081	3.36e-07	2.36e-05	0.00173855	19.7374	40.9189	19.8767
rs1986719	T	C	T	C	-0.1954	-0.1029	0.9572	0.9845	Prostate cancer	17	45959996	0.0319	0.001243	GCST90274793	17	45959996	0.039	5.44e-07	Hepatocyte growth factor levels	0.0017029	7.42e-05	0.00016263	0.00312842	46.1824	40.9189	25.1027
rs201840950	T	G	T	G	0.0993	0.0435	0.7957	0.8248	Prostate cancer	6	32487091	0.013	0.000857196	GCST90274793	6	32487091	0.0215	3.86e-06	Hepatocyte growth factor levels	0.00208411	7.98e-05	0.000336343	0.00320587	32.8501	40.9189	21.3315
rs2281532	T	C	T	C	-0.0698	-0.0038	0.7983	0.786	Prostate cancer	20	6103587	0.0103	0.7118	GCST90274793	20	6103587	0.0151	3.79e-06	Hepatocyte growth factor levels	0.00149368	9.7e-07	1.78e-05	0.00156896	22.4463	40.9189	21.3677
rs2737756	A	G	A	G	0.2047	0.0053	0.0276	0.0229	Prostate cancer	3	128064791	0.0271	0.8461	GCST90274793	3	128064791	0.0391	1.65e-07	Hepatocyte growth factor levels	0.00185902	2.73e-07	8.72e-07	0.00224916	33.1732	40.9189	27.4083
rs34219417	T	C	T	C	0.0992	-0.0089	0.8959	0.896	Prostate cancer	1	38949303	0.0172	0.605701	GCST90274793	1	38949303	0.0217	4.84e-06	Hepatocyte growth factor levels	0.0014609	1.91e-06	2.71e-05	0.00183554	26.2671	40.9189	20.898
rs4290523	T	C	T	C	-0.0992	-0.0341	0.0942	0.0994	Prostate cancer	17	7014969	0.0147	0.0197902	GCST90274793	17	7014969	0.0217	4.84e-06	Hepatocyte growth factor levels	0.00162442	3.84e-05	0.000213693	0.00167933	21.6056	40.9189	20.898
rs57193877	T	C	T	C	0.1572	-0.0175	0.9611	0.9642	Prostate cancer	14	65654346	0.0223	0.4329	GCST90274793	14	65654346	0.0311	4.31e-07	Hepatocyte growth factor levels	0.00173235	4.39e-06	4.99e-06	0.00184779	27.2554	40.9189	25.5496
rs5745687	T	C	T	C	-0.1943	-0.0217	0.0608	0.0617	Prostate cancer	7	81359051	0.0174	0.2126	GCST90274793	7	81359051	0.0242	9.83e-16	Hepatocyte growth factor levels	0.00435699	1.11e-05	4.24e-13	0.00431159	63.789	40.9189	64.4636
rs5745692	C	G	C	G	-0.1545	0.0314	0.964	0.9672	Prostate cancer	7	81358266	0.0253	0.2155	GCST90274793	7	81358266	0.0332	3.26e-06	Hepatocyte growth factor levels	0.00146964	1.1e-05	5.27e-05	0.00165679	24.4184	40.9189	21.6561
rs59950280	A	G	A	G	0.1219	0.0066	0.328	0.3277	Prostate cancer	4	3452345	0.0091	0.4688	GCST90274793	4	3452345	0.0131	1.34e-20	Hepatocyte growth factor levels	0.00650726	3.75e-06	4.22e-18	0.00655059	87.1698	40.9189	86.5894
rs6709159	A	G	A	G	0.0564	0.006	0.4434	0.4466	Prostate cancer	2	108946178	0.0083	0.4674	GCST90274793	2	108946178	0.0114	7.52e-07	Hepatocyte growth factor levels	0.00165869	3.73e-06	7.39e-06	0.0015701	23.1671	40.9189	24.4765
rs72778371	A	G	A	G	-0.0717	-0.0213	0.2021	0.1977	Prostate cancer	16	57045498	0.0107	0.04652	GCST90274793	16	57045498	0.0161	8.45e-06	Hepatocyte growth factor levels	0.00154862	2.83e-05	0.000227213	0.00165799	21.236	40.9189	19.8329
rs73012713	A	G	A	G	-0.222	0.0393	0.0162	0.0152	Prostate cancer	6	146855017	0.0357	0.2718	GCST90274793	6	146855017	0.0501	9.37e-06	Hepatocyte growth factor levels	0.00137273	8.64e-06	0.000102073	0.00157093	22.4745	40.9189	19.635
rs739269	T	C	T	C	-0.0556	0.0178	0.6561	0.6438	Prostate cancer	22	38212068	0.0085	0.0353598	GCST90274793	22	38212068	0.0125	8.67e-06	Hepatocyte growth factor levels	0.00138318	3.13e-05	0.000318592	0.00139502	19.9544	40.9189	19.7847
rs74130123	T	C	T	C	-0.2429	-0.0479	0.9809	0.9886	Prostate cancer	10	30042437	0.0416	0.2494	GCST90274793	10	30042437	0.0489	6.79e-07	Hepatocyte growth factor levels	0.00167205	9.45e-06	1.25e-05	0.00221077	32.6412	40.9189	24.6739
rs79246709	T	G	T	G	0.1375	0.0038	0.0427	0.0396	Prostate cancer	7	19933976	0.0231	0.8696	GCST90274793	7	19933976	0.0305	6.54e-06	Hepatocyte growth factor levels	0.00137907	1.93e-07	2.27e-05	0.00154565	22.7826	40.9189	20.3238
rs80308275	T	C	T	C	-0.1177	0.0516	0.0698	0.0714	Prostate cancer	4	153539149	0.0201	0.0101599	GCST90274793	4	153539149	0.026	5.98e-06	Hepatocyte growth factor levels	0.00138941	4.7e-05	0.000441529	0.00179893	26.5442	40.9189	20.493
rs8106345	A	G	A	G	0.0592	0.0092	0.5179	0.5257	Prostate cancer	19	58888317	0.0083	0.2696	GCST90274793	19	58888317	0.0127	3.14e-06	Hepatocyte growth factor levels	0.00174898	8.76e-06	3.32e-05	0.00175007	21.7425	40.9189	21.7288
rs1392570	A	G	A	G	-0.0627	-0.0156	0.6157	0.6168	Prostate cancer	3	20774445	0.0087	0.0728501	GCST90274794	3	20774445	0.0139	6.46e-06	Interferon gamma levels	0.0017906	2.29e-05	0.000119664	0.00186039	21.1418	40.9189	20.3472
rs140562194	T	C	T	C	0.4666	-0.0044	0.0122	0.0108	Prostate cancer	11	110972327	0.0492	0.9287	GCST90274794	11	110972327	0.0897	1.97e-07	Interferon gamma levels	0.00364619	5.7e-08	4.5e-07	0.00524745	39.0043	40.9189	27.0586
rs146527076	C	G	C	G	0.1935	0.0154	0.9683	0.971	Prostate cancer	13	90334795	0.0256	0.546799	GCST90274794	13	90334795	0.0384	4.68e-07	Interferon gamma levels	0.00215108	2.58e-06	3e-06	0.00229859	27.1374	40.9189	25.3922
rs1953463	A	G	A	G	-0.0801	0.0042	0.8282	0.828	Prostate cancer	14	44797800	0.011	0.704601	GCST90274794	14	44797800	0.0176	5.34e-06	Interferon gamma levels	0.00182272	1.04e-06	1.94e-05	0.0018258	20.7479	40.9189	20.7128
rs34658335	T	C	T	C	0.1163	0.0143	0.0793	0.0725	Prostate cancer	7	10535996	0.0162	0.3771	GCST90274794	7	10535996	0.0261	8.35e-06	Interferon gamma levels	0.00174739	5.56e-06	5.27e-05	0.00197506	22.4475	40.9189	19.8554
rs531747046	T	G	T	G	0.2684	0.0107	0.0324	0.0225	Prostate cancer	16	33979312	0.0357	0.7642	GCST90274794	16	33979312	0.0573	2.81e-06	Interferon gamma levels	0.00349549	6.41e-07	6.24e-06	0.00451685	28.3811	40.9189	21.941
rs539956329	T	C	T	C	-0.1448	-0.0023	0.9424	0.9417	Prostate cancer	11	91764263	0.0173	0.8937	GCST90274794	11	91764263	0.0325	8.37e-06	Interferon gamma levels	0.00236291	1.26e-07	1.75e-05	0.00227628	19.121	40.9189	19.8505
rs557338678	T	C	T	C	0.2392	-0.0237	0.0411	0.031	Prostate cancer	7	30582562	0.0335	0.4799	GCST90274794	7	30582562	0.0533	7.2e-06	Interferon gamma levels	0.00292011	3.57e-06	2.38e-05	0.00450991	31.1551	40.9189	20.1404
rs61863416	A	G	A	G	0.136	0.0264	0.9427	0.9547	Prostate cancer	10	130545142	0.0229	0.2489	GCST90274794	10	130545142	0.0283	1.54e-06	Interferon gamma levels	0.00195796	9.48e-06	1.76e-05	0.00199819	23.5697	40.9189	23.0943
rs61904946	T	G	T	G	0.1257	0.0368	0.0613	0.0511	Prostate cancer	11	116241126	0.0225	0.1031	GCST90274794	11	116241126	0.0282	8.29e-06	Interferon gamma levels	0.00168239	1.91e-05	0.000131126	0.00181839	21.4779	40.9189	19.8688
rs62230781	A	G	A	G	0.2184	-0.0094	0.0412	0.0376	Prostate cancer	21	37335521	0.0247	0.704901	GCST90274794	21	37335521	0.0403	5.98e-08	Interferon gamma levels	0.00258252	1.03e-06	3.29e-07	0.00376843	42.907	40.9189	29.3694
rs6442763	A	C	A	C	0.0648	-0.007	0.4253	0.4241	Prostate cancer	3	2921515	0.0084	0.4054	GCST90274794	3	2921515	0.014	3.68e-06	Interferon gamma levels	0.00188515	4.95e-06	2.42e-05	0.00205266	23.3312	40.9189	21.4237
rs67101138	T	G	T	G	0.1461	0.0305	0.9482	0.9596	Prostate cancer	2	19234534	0.0204	0.134	GCST90274794	2	19234534	0.0307	1.95e-06	Interferon gamma levels	0.00191708	1.59e-05	3.29e-05	0.00209682	24.7755	40.9189	22.6477
rs704	A	G	A	G	-0.0635	-0.0038	0.4705	0.4677	Prostate cancer	17	26694861	0.008	0.6343	GCST90274794	17	26694861	0.0127	5.73e-07	Interferon gamma levels	0.00211577	1.61e-06	3.04e-06	0.00200911	23.7371	40.9189	25
rs74245341	A	C	A	C	0.2414	-0.0116	0.0232	0.034	Prostate cancer	15	93585096	0.0295	0.694201	GCST90274794	15	93585096	0.0533	5.92e-06	Interferon gamma levels	0.00191019	1.1e-06	2.05e-05	0.00264118	28.3831	40.9189	20.5126
rs74903999	T	C	T	C	0.3485	0.0313	0.9882	0.9862	Prostate cancer	13	27473585	0.0435	0.4717	GCST90274794	13	27473585	0.0708	8.55e-07	Interferon gamma levels	0.00229005	3.69e-06	5.25e-06	0.00283245	29.9843	40.9189	24.2292
rs78042482	A	G	A	G	0.2688	0.014	0.0145	0.0143	Prostate cancer	15	58694863	0.0428	0.7431	GCST90274794	15	58694863	0.0606	9.18e-06	Interferon gamma levels	0.00180377	7.63e-07	2.87e-05	0.00206497	22.5299	40.9189	19.6749
rs7909512	A	G	A	G	0.0567	-0.0127	0.5207	0.5208	Prostate cancer	10	3683786	0.0081	0.1152	GCST90274794	10	3683786	0.0128	9.44e-06	Interferon gamma levels	0.00166393	1.75e-05	0.000135051	0.00160469	18.9224	40.9189	19.6221
rs80064136	A	G	A	G	0.2305	-0.01	0.9818	0.9768	Prostate cancer	1	46963687	0.0325	0.758399	GCST90274794	1	46963687	0.0521	9.68e-06	Interferon gamma levels	0.00165756	6.75e-07	3.15e-05	0.00189874	22.4269	40.9189	19.5734
rs10067443	T	C	T	C	-0.0753	0.007	0.8011	0.8026	Prostate cancer	5	19244332	0.0105	0.5075	GCST90274795	5	19244332	0.0149	4.33e-07	Interleukin-10 levels	0.00178356	3.17e-06	4.03e-06	0.00180693	25.875	40.9189	25.5398
rs116018601	T	C	T	C	0.1763	0.0041	0.9715	0.9721	Prostate cancer	5	132022975	0.028	0.8841	GCST90274795	5	132022975	0.0398	9.44e-06	Interleukin-10 levels	0.00133078	1.53e-07	3.08e-05	0.00172116	25.3878	40.9189	19.6218
rs12123181	A	G	A	G	-0.0996	-0.0011	0.2042	0.2114	Prostate cancer	1	206954566	0.0102	0.9171	GCST90274795	1	206954566	0.0151	4.22e-11	Interleukin-10 levels	0.00303453	8.29e-08	4.17e-10	0.0032241	46.2343	40.9189	43.5076
rs1370717	A	G	A	G	-0.0534	0.0056	0.4388	0.4353	Prostate cancer	3	32354387	0.0089	0.5309	GCST90274795	3	32354387	0.0118	6.03e-06	Interleukin-10 levels	0.00138858	2.82e-06	3.96e-05	0.00140442	20.7134	40.9189	20.4795
rs138203589	T	G	T	G	0.1937	0.0415	0.0455	0.0183	Prostate cancer	2	125939274	0.0303	0.1711	GCST90274795	2	125939274	0.0418	3.59e-06	Interleukin-10 levels	0.0014559	1.34e-05	6.75e-05	0.00325894	48.1546	40.9189	21.4737
rs147027610	T	C	T	C	0.1876	0.02	0.9747	0.9751	Prostate cancer	13	52566577	0.0276	0.4692	GCST90274795	13	52566577	0.0416	6.49e-06	Interleukin-10 levels	0.0014253	3.74e-06	4.59e-05	0.00173575	24.774	40.9189	20.3366
rs148332061	C	G	C	G	0.1112	-0.0074	0.1005	0.0936	Prostate cancer	7	590757	0.0188	0.696	GCST90274795	7	590757	0.0239	3.28e-06	Interleukin-10 levels	0.00163359	1.1e-06	1.49e-05	0.00223566	29.6441	40.9189	21.6478
rs150408090	A	G	A	G	0.3666	-0.0138	0.9898	0.9902	Prostate cancer	6	122709508	0.0448	0.7583	GCST90274795	6	122709508	0.0761	1.45e-06	Interleukin-10 levels	0.0018815	6.77e-07	5.9e-06	0.0027137	33.4993	40.9189	23.2068
rs17632797	A	G	A	G	-0.0772	0.0135	0.8561	0.8653	Prostate cancer	15	95207832	0.0133	0.3109	GCST90274795	15	95207832	0.0173	8.1e-06	Interleukin-10 levels	0.00139118	7.35e-06	8.11e-05	0.00146842	21.0204	40.9189	19.9133
rs17654493	T	C	T	C	0.2951	-0.0146	0.014	0.0125	Prostate cancer	6	18825879	0.0436	0.7373	GCST90274795	6	18825879	0.0626	2.43e-06	Interleukin-10 levels	0.00180183	8e-07	9.72e-06	0.00240421	29.6696	40.9189	22.2223
rs17747934	A	G	A	G	-0.1551	-0.0132	0.9375	0.9612	Prostate cancer	20	60272196	0.0259	0.611299	GCST90274795	20	60272196	0.0342	5.76e-06	Interleukin-10 levels	0.00155216	1.85e-06	2.86e-05	0.00281906	37.4017	40.9189	20.567
rs188535859	T	C	T	C	-0.2351	-0.0025	0.0174	0.0169	Prostate cancer	2	201728383	0.033	0.9397	GCST90274795	2	201728383	0.0486	1.32e-06	Interleukin-10 levels	0.00158517	4.09e-08	4.72e-06	0.00189	27.9094	40.9189	23.4009
rs28419759	A	C	A	C	-0.0542	-0.0003	0.5556	0.5485	Prostate cancer	4	78929167	0.0083	0.9688	GCST90274795	4	78929167	0.0121	7.49e-06	Interleukin-10 levels	0.00144671	9.31e-09	2.03e-05	0.00145066	20.1193	40.9189	20.0645
rs28651780	T	C	T	C	-0.0746	0.0079	0.8437	0.8498	Prostate cancer	4	68058232	0.0118	0.506001	GCST90274795	4	68058232	0.0167	7.93e-06	Interleukin-10 levels	0.00139407	3.2e-06	5.11e-05	0.00146776	21.011	40.9189	19.9547
rs3135932	A	G	A	G	-0.1597	0.0133	0.823	0.8264	Prostate cancer	11	117864063	0.0109	0.2218	GCST90274795	11	117864063	0.0154	3.39e-25	Interleukin-10 levels	0.00724195	1.06e-05	2.64e-21	0.00743041	110.359	40.9189	107.54
rs34059323	A	G	A	G	-0.1789	-0.05	0.0275	0.0223	Prostate cancer	7	148496619	0.0331	0.1307	GCST90274795	7	148496619	0.0401	8.14e-06	Interleukin-10 levels	0.00134831	1.63e-05	0.000158766	0.00171188	25.2798	40.9189	19.9036
rs3769274	A	G	A	G	0.0771	-0.0048	0.8403	0.8436	Prostate cancer	2	173757986	0.011	0.666099	GCST90274795	2	173757986	0.0162	1.94e-06	Interleukin-10 levels	0.00153431	1.36e-06	1.13e-05	0.00159543	23.5542	40.9189	22.6505
rs385697	T	C	T	C	0.0555	-0.0021	0.6126	0.6021	Prostate cancer	6	7880027	0.0088	0.8141	GCST90274795	6	7880027	0.0119	3.1e-06	Interleukin-10 levels	0.00147501	4.06e-07	1.29e-05	0.00146202	21.5597	40.9189	21.7516
rs389239	A	G	A	G	-0.0574	0.0071	0.6162	0.6305	Prostate cancer	6	169465075	0.0093	0.4404	GCST90274795	6	169465075	0.0125	4.39e-06	Interleukin-10 levels	0.00147302	4.16e-06	3.46e-05	0.0015584	22.3106	40.9189	21.0865
rs398518	A	G	A	G	-0.1293	0.0122	0.9146	0.9208	Prostate cancer	3	8954959	0.0157	0.4396	GCST90274795	3	8954959	0.0218	3.01e-09	Interleukin-10 levels	0.00245506	4.31e-06	6.25e-08	0.00261166	37.4288	40.9189	35.179
rs4655953	A	G	A	G	0.0565	-0.0048	0.3683	0.374	Prostate cancer	1	87832695	0.0083	0.5653	GCST90274795	1	87832695	0.0121	3.02e-06	Interleukin-10 levels	0.00147902	2.38e-06	2.02e-05	0.00148539	21.8974	40.9189	21.8035
rs549056348	A	C	A	C	0.1647	0.0241	0.0539	0.0529	Prostate cancer	2	87296860	0.0242	0.3205	GCST90274795	2	87296860	0.0338	1.1e-06	Interleukin-10 levels	0.00201395	7.07e-06	1.07e-05	0.00276658	32.6419	40.9189	23.744
rs66624860	T	C	T	C	0.0681	0.0089	0.2791	0.2782	Prostate cancer	8	61861039	0.0095	0.3486	GCST90274795	8	61861039	0.0143	1.91e-06	Interleukin-10 levels	0.00176907	6.26e-06	1.82e-05	0.0018662	23.9265	40.9189	22.6789
rs67037615	T	C	T	C	-0.1528	0.0349	0.8893	0.8821	Prostate cancer	6	32453163	0.0125	0.00504603	GCST90274795	6	32453163	0.0196	6.39e-15	Interleukin-10 levels	0.00423388	5.56e-05	4.96e-11	0.00459698	66.0127	40.9189	60.7763
rs72661933	A	C	A	C	-0.2388	-0.016	0.9811	0.9892	Prostate cancer	13	113612154	0.0464	0.730601	GCST90274795	13	113612154	0.0535	8.06e-06	Interleukin-10 levels	0.00144091	8.48e-07	3.26e-05	0.00211482	29.2612	40.9189	19.9233
rs72701782	A	G	A	G	0.0981	0.014	0.0999	0.1026	Prostate cancer	4	185304872	0.015	0.3508	GCST90274795	4	185304872	0.0211	3.33e-06	Interleukin-10 levels	0.00150995	6.21e-06	3.41e-05	0.00173071	24.7817	40.9189	21.6159
rs73226323	T	C	T	C	0.1847	-0.0002	0.9755	0.9791	Prostate cancer	3	111531258	0.0315	0.9948	GCST90274795	3	111531258	0.0415	8.56e-06	Interleukin-10 levels	0.00134238	2.87e-10	2.33e-05	0.00163064	24.0683	40.9189	19.8079
rs7500869	A	C	A	C	-0.0714	0.0038	0.1848	0.1737	Prostate cancer	16	11009587	0.0119	0.7471	GCST90274795	16	11009587	0.0159	7.1e-06	Interleukin-10 levels	0.0013661	7.27e-07	3.02e-05	0.00153601	22.6771	40.9189	20.1652
rs76932862	T	C	T	C	0.1401	-0.0162	0.1028	0.1049	Prostate cancer	14	20318041	0.0195	0.4052	GCST90274795	14	20318041	0.0291	1.48e-06	Interleukin-10 levels	0.00186427	4.92e-06	1.21e-05	0.00362067	45.0958	40.9189	23.1788
rs79438518	A	T	A	T	-0.2845	-0.0172	0.0122	0.0087	Prostate cancer	9	18625666	0.0475	0.7172	GCST90274795	9	18625666	0.0618	4.15e-06	Interleukin-10 levels	0.00153258	9.35e-07	1.85e-05	0.00195085	26.988	40.9189	21.1928
rs9975090	A	G	A	G	0.0551	0.0185	0.5972	0.6091	Prostate cancer	21	43024340	0.0102	0.0696097	GCST90274795	21	43024340	0.0123	7.48e-06	Interleukin-10 levels	0.00140194	2.35e-05	0.000203383	0.00146064	20.9089	40.9189	20.0675
rs10091841	T	G	T	G	0.064	0.013	0.4945	0.4897	Prostate cancer	8	9104264	0.0083	0.1168	GCST90274796	8	9104264	0.0135	2.13e-06	Interleukin-10 receptor subunit alpha levels	0.00197745	1.75e-05	3.63e-05	0.00204775	23.2753	40.9189	22.4746
rs12026492	T	C	T	C	0.0709	-0.0089	0.2527	0.2498	Prostate cancer	1	226676794	0.0096	0.3544	GCST90274796	1	226676794	0.0156	5.5e-06	Interleukin-10 receptor subunit alpha levels	0.00181771	6.13e-06	3.85e-05	0.00189855	21.5762	40.9189	20.6559
rs1377036	A	G	A	G	-0.0791	-0.0024	0.8076	0.801	Prostate cancer	20	12662915	0.0106	0.821	GCST90274796	20	12662915	0.0179	9.92e-06	Interleukin-10 receptor subunit alpha levels	0.0019676	3.66e-07	2.54e-05	0.00194439	19.2967	40.9189	19.5275
rs143313574	T	C	T	C	-0.3868	0.1095	0.0107	0.0102	Prostate cancer	16	5247086	0.0498	0.0280698	GCST90274796	16	5247086	0.0841	4.24e-06	Interleukin-10 receptor subunit alpha levels	0.00212061	3.45e-05	0.000105971	0.00316749	31.6293	40.9189	21.1534
rs17832137	A	G	A	G	0.1676	0.0159	0.0481	0.0478	Prostate cancer	14	55005535	0.0186	0.3917	GCST90274796	14	55005535	0.0343	1.03e-06	Interleukin-10 receptor subunit alpha levels	0.0023156	5.21e-06	7.09e-06	0.00257226	26.5291	40.9189	23.8759
rs180893431	A	C	A	C	0.4057	-0.0035	0.9896	0.9894	Prostate cancer	6	78703747	0.0458	0.9396	GCST90274796	6	78703747	0.0865	2.73e-06	Interleukin-10 receptor subunit alpha levels	0.00235018	4.16e-08	6.17e-06	0.00338792	31.7439	40.9189	21.9977
rs28408877	C	G	C	G	-0.069	0.0094	0.7429	0.7469	Prostate cancer	1	247347252	0.0093	0.3118	GCST90274796	1	247347252	0.0153	6.49e-06	Interleukin-10 receptor subunit alpha levels	0.00178982	7.28e-06	4.91e-05	0.0018187	20.6671	40.9189	20.3383
rs286605	T	G	T	G	0.0623	0.0078	0.5891	0.5817	Prostate cancer	5	154443639	0.0082	0.3427	GCST90274796	5	154443639	0.0131	1.98e-06	Interleukin-10 receptor subunit alpha levels	0.00191448	6.45e-06	1.7e-05	0.00187902	22.1972	40.9189	22.6169
rs3135932	A	G	A	G	-0.0844	0.0133	0.8171	0.8264	Prostate cancer	11	117864063	0.0109	0.2218	GCST90274796	11	117864063	0.0168	5.07e-07	Interleukin-10 receptor subunit alpha levels	0.00213593	1.06e-05	7.35e-06	0.00212914	25.1582	40.9189	25.2387
rs3777726	T	C	T	C	-0.075	0.0102	0.2995	0.2945	Prostate cancer	6	167359279	0.0092	0.2721	GCST90274796	6	167359279	0.0165	5.48e-06	Interleukin-10 receptor subunit alpha levels	0.00217952	8.76e-06	3.8e-05	0.00236025	22.3784	40.9189	20.6612
rs41272625	T	G	T	G	0.082	-0.0136	0.1526	0.152	Prostate cancer	3	158540291	0.0114	0.2332	GCST90274796	3	158540291	0.0179	4.63e-06	Interleukin-10 receptor subunit alpha levels	0.00177799	1.01e-05	4.78e-05	0.001739	20.5246	40.9189	20.9856
rs492616	A	G	A	G	-0.0835	-0.0308	0.8497	0.8615	Prostate cancer	6	116712455	0.0116	0.00779704	GCST90274796	6	116712455	0.0189	9.96e-06	Interleukin-10 receptor subunit alpha levels	0.00171796	5.03e-05	0.000428498	0.00178085	20.2344	40.9189	19.5186
rs62262707	A	C	A	C	0.2156	0.0711	0.0253	0.0189	Prostate cancer	3	83110489	0.0322	0.0273602	GCST90274796	3	83110489	0.0483	8.05e-06	Interleukin-10 receptor subunit alpha levels	0.00175353	3.48e-05	0.000225917	0.00229255	26.0642	40.9189	19.9252
rs6670799	A	G	A	G	-0.1247	0.0221	0.0839	0.0802	Prostate cancer	1	56566352	0.0153	0.1489	GCST90274796	1	56566352	0.0252	7.48e-07	Interleukin-10 receptor subunit alpha levels	0.00215411	1.49e-05	1.28e-05	0.00239038	27.1791	40.9189	24.4868
rs74719858	A	G	A	G	0.3915	0.0225	0.9853	0.9864	Prostate cancer	14	66407688	0.0442	0.611	GCST90274796	14	66407688	0.0823	1.97e-06	Interleukin-10 receptor subunit alpha levels	0.00208013	1.85e-06	8.8e-06	0.00443996	48.4152	40.9189	22.6289
rs79202194	T	C	T	C	-0.0993	0.0102	0.1001	0.0898	Prostate cancer	8	27864161	0.0152	0.502599	GCST90274796	8	27864161	0.0224	9.29e-06	Interleukin-10 receptor subunit alpha levels	0.00166405	3.21e-06	4.71e-05	0.00177647	20.9818	40.9189	19.6518
rs80137559	T	C	T	C	0.2347	0.0287	0.9822	0.9771	Prostate cancer	10	18335103	0.0302	0.3422	GCST90274796	10	18335103	0.0511	4.37e-06	Interleukin-10 receptor subunit alpha levels	0.0017862	6.44e-06	3.4e-05	0.00192609	22.7505	40.9189	21.0952
rs9472032	A	C	A	C	0.0968	0.0086	0.1006	0.1072	Prostate cancer	6	43294041	0.0131	0.5118	GCST90274796	6	43294041	0.0214	6.09e-06	Interleukin-10 receptor subunit alpha levels	0.00173229	3.07e-06	3.18e-05	0.00169563	20.0272	40.9189	20.4608
rs9548767	T	G	T	G	-0.0686	0.0159	0.2251	0.2303	Prostate cancer	13	31511360	0.0097	0.1013	GCST90274796	13	31511360	0.0155	9.61e-06	Interleukin-10 receptor subunit alpha levels	0.00166018	1.92e-05	0.00014865	0.00164172	19.3696	40.9189	19.5878
rs958402	T	C	T	C	0.06	-0.0001	0.4233	0.427	Prostate cancer	8	97437587	0.0082	0.9898	GCST90274796	8	97437587	0.0134	7.55e-06	Interleukin-10 receptor subunit alpha levels	0.0017644	1.06e-09	1.69e-05	0.00175764	19.9721	40.9189	20.049
rs111850948	A	G	A	G	-0.0843	0.0251	0.1348	0.1275	Prostate cancer	7	25740142	0.0132	0.0582895	GCST90274797	7	25740142	0.0181	3.2e-06	Interleukin-10 receptor subunit beta levels	0.00151631	2.58e-05	0.000114487	0.00165764	23.7171	40.9189	21.6919
rs112798338	T	C	T	C	0.1926	-0.0172	0.026	0.0237	Prostate cancer	1	228433772	0.0292	0.554799	GCST90274797	1	228433772	0.0411	2.78e-06	Interleukin-10 receptor subunit beta levels	0.00153501	2.47e-06	1.84e-05	0.00187878	26.8869	40.9189	21.9598
rs114288486	T	C	T	C	0.1449	-0.0226	0.0363	0.0345	Prostate cancer	1	212796908	0.023	0.3263	GCST90274797	1	212796908	0.0311	3.17e-06	Interleukin-10 receptor subunit beta levels	0.00147174	6.88e-06	3.66e-05	0.00146898	21.6669	40.9189	21.7078
rs115242284	T	C	T	C	-0.1662	0.0091	0.027	0.0248	Prostate cancer	4	183615376	0.0291	0.753101	GCST90274797	4	183615376	0.0373	8.36e-06	Interleukin-10 receptor subunit beta levels	0.00134677	6.97e-07	3.45e-05	0.00145134	21.3977	40.9189	19.8538
rs1153572	T	C	T	C	-0.0548	0.0021	0.5866	0.5743	Prostate cancer	3	4275803	0.0082	0.7968	GCST90274797	3	4275803	0.0119	4.12e-06	Interleukin-10 receptor subunit beta levels	0.00148243	4.68e-07	1.65e-05	0.00145648	20.8347	40.9189	21.2064
rs116315732	T	C	T	C	0.1988	-0.0451	0.0212	0.0213	Prostate cancer	2	176630651	0.0283	0.1115	GCST90274797	2	176630651	0.0402	7.6e-07	Interleukin-10 receptor subunit beta levels	0.00165729	1.81e-05	2.54e-05	0.00164018	24.2029	40.9189	24.4557
rs116898411	A	G	A	G	-0.1593	0.027	0.96	0.9663	Prostate cancer	8	128868102	0.0233	0.2461	GCST90274797	8	128868102	0.0349	5.01e-06	Interleukin-10 receptor subunit beta levels	0.00145646	9.57e-06	6.47e-05	0.00194891	27.8927	40.9189	20.8344
rs117092856	A	G	A	G	-0.3461	0.0531	0.0088	0.0098	Prostate cancer	6	150298636	0.058	0.3606	GCST90274797	6	150298636	0.0783	9.86e-06	Interleukin-10 receptor subunit beta levels	0.00145399	5.98e-06	7.78e-05	0.00208967	28.0979	40.9189	19.538
rs11731108	C	G	C	G	-0.0592	-0.0226	0.7134	0.7093	Prostate cancer	4	185140403	0.0089	0.0114799	GCST90274797	4	185140403	0.0132	7.3e-06	Interleukin-10 receptor subunit beta levels	0.00140616	4.6e-05	0.000466263	0.00143312	20.5001	40.9189	20.1139
rs117883662	C	G	C	G	-0.4295	-0.0001	0.9904	0.9909	Prostate cancer	19	49553051	0.0567	0.9991	GCST90274797	19	49553051	0.0907	2.19e-06	Interleukin-10 receptor subunit beta levels	0.00250311	2.22e-11	4.46e-06	0.00350783	31.4563	40.9189	22.4239
rs12087642	A	G	A	G	-0.0533	0.0002	0.3491	0.3611	Prostate cancer	1	216769382	0.0086	0.9825	GCST90274797	1	216769382	0.0118	6.27e-06	Interleukin-10 receptor subunit beta levels	0.00138442	3.86e-09	1.8e-05	0.00129107	19.0252	40.9189	20.4028
rs142421172	A	G	A	G	0.208	-0.0018	0.0438	0.0474	Prostate cancer	1	179682087	0.0204	0.9297	GCST90274797	1	179682087	0.031	1.95e-11	Interleukin-10 receptor subunit beta levels	0.00349451	5.55e-08	1.63e-10	0.00362393	46.6932	40.9189	45.0198
rs145144288	T	G	T	G	-0.3019	-0.0478	0.9879	0.9895	Prostate cancer	10	121606887	0.0434	0.2714	GCST90274797	10	121606887	0.0671	6.82e-06	Interleukin-10 receptor subunit beta levels	0.00141519	8.65e-06	7.81e-05	0.00217899	31.1926	40.9189	20.2433
rs149156511	A	G	A	G	0.2066	0.0304	0.0323	0.0221	Prostate cancer	20	39437913	0.0372	0.4139	GCST90274797	20	39437913	0.0444	3.27e-06	Interleukin-10 receptor subunit beta levels	0.00151352	4.76e-06	2.87e-05	0.0026683	38.2159	40.9189	21.6518
rs1605333	C	G	C	G	-0.0601	0.0057	0.6484	0.6516	Prostate cancer	12	58388232	0.0089	0.5213	GCST90274797	12	58388232	0.0124	1.25e-06	Interleukin-10 receptor subunit beta levels	0.00177179	2.92e-06	8.85e-06	0.00164691	21.8329	40.9189	23.4912
rs192325200	A	G	A	G	-0.2327	0.0155	0.9827	0.9858	Prostate cancer	10	71477178	0.0387	0.688101	GCST90274797	10	71477178	0.0505	4.07e-06	Interleukin-10 receptor subunit beta levels	0.00152906	1.14e-06	1.92e-05	0.00184115	25.5747	40.9189	21.2329
rs2266590	A	G	A	G	-0.4105	0.029	0.5426	0.5436	Prostate cancer	21	34659396	0.0081	0.000359998	GCST90274797	21	34659396	0.0108	1e-300	Interleukin-10 receptor subunit beta levels	0.0894182	9.14e-05	1.18e-260	0.0836435	1342.89	40.9189	1444.7
rs34361138	A	G	A	G	0.0532	-0.0007	0.5488	0.5441	Prostate cancer	6	41174158	0.0081	0.9333	GCST90274797	6	41174158	0.0113	2.5e-06	Interleukin-10 receptor subunit beta levels	0.00150249	5.32e-08	8.56e-06	0.00140164	20.6751	40.9189	22.1649
rs4686528	A	G	A	G	-0.1435	-0.0406	0.9488	0.9611	Prostate cancer	3	189486023	0.0232	0.0796801	GCST90274797	3	189486023	0.0317	5.99e-06	Interleukin-10 receptor subunit beta levels	0.00143256	2.18e-05	0.000157246	0.00200068	28.6351	40.9189	20.492
rs55780441	T	C	T	C	0.1783	0.0251	0.9674	0.9687	Prostate cancer	16	13209083	0.0257	0.3298	GCST90274797	16	13209083	0.0348	3e-07	Interleukin-10 receptor subunit beta levels	0.00177873	6.8e-06	4.85e-06	0.00200519	29.5999	40.9189	26.2509
rs6584485	T	C	T	C	0.0743	-0.0137	0.8362	0.8416	Prostate cancer	10	103937244	0.0112	0.2188	GCST90274797	10	103937244	0.0161	3.93e-06	Interleukin-10 receptor subunit beta levels	0.00148877	1.07e-05	5.74e-05	0.00151228	21.6341	40.9189	21.2974
rs75710908	A	G	A	G	0.1586	-0.007	0.9665	0.9657	Prostate cancer	21	34510084	0.0254	0.784	GCST90274797	21	34510084	0.0341	3.3e-06	Interleukin-10 receptor subunit beta levels	0.00146881	5.42e-07	1.43e-05	0.00162886	23.9931	40.9189	21.632
rs7815666	T	C	T	C	0.0512	-0.0071	0.5351	0.5437	Prostate cancer	8	18274205	0.0084	0.3984	GCST90274797	8	18274205	0.0113	5.87e-06	Interleukin-10 receptor subunit beta levels	0.00139179	5.09e-06	5.15e-05	0.00130426	19.2369	40.9189	20.5297
rs7855466	T	C	T	C	0.0861	-0.008	0.1723	0.1591	Prostate cancer	9	136121303	0.0112	0.473	GCST90274797	9	136121303	0.0169	3.49e-07	Interleukin-10 receptor subunit beta levels	0.00219834	3.64e-06	2.7e-06	0.00211444	24.963	40.9189	25.9557
rs8064909	T	C	T	C	-0.0608	-0.0096	0.4413	0.4554	Prostate cancer	17	74093726	0.0087	0.272	GCST90274797	17	74093726	0.0135	6.68e-06	Interleukin-10 receptor subunit beta levels	0.00196939	8.68e-06	4.97e-05	0.00182285	18.7712	40.9189	20.2833
rs9685374	A	G	A	G	-0.0618	-0.017	0.2721	0.2759	Prostate cancer	4	119751261	0.0093	0.0682794	GCST90274797	4	119751261	0.0134	3.99e-06	Interleukin-10 receptor subunit beta levels	0.00148686	2.38e-05	0.000124713	0.00151289	21.6429	40.9189	21.27
rs10774625	A	G	A	G	0.131	-0.0172	0.49	0.4931	Prostate cancer	12	111910219	0.0081	0.0351099	GCST90274798	12	111910219	0.0131	1.52e-23	Interleukin-12 subunit beta levels	0.00841609	3.21e-05	2.26e-19	0.00857707	101.929	40.9189	100
rs12588969	C	G	C	G	-0.1297	0.0116	0.6875	0.6898	Prostate cancer	14	103230758	0.0088	0.1853	GCST90274798	14	103230758	0.0127	1.74e-24	Interleukin-12 subunit beta levels	0.00724825	1.24e-05	1.21e-20	0.00722824	104.007	40.9189	104.297
rs12639588	A	G	A	G	-0.2517	-0.0234	0.5635	0.5497	Prostate cancer	3	188121263	0.0086	0.00637705	GCST90274798	3	188121263	0.0117	1.18e-102	Interleukin-12 subunit beta levels	0.031381	5.28e-05	3.56e-85	0.0311655	459.521	40.9189	462.801
rs12766137	C	G	C	G	0.0709	0.0107	0.8109	0.8113	Prostate cancer	10	94525783	0.0106	0.3094	GCST90274798	10	94525783	0.0149	1.95e-06	Interleukin-12 subunit beta levels	0.00153542	7.27e-06	2.51e-05	0.00154163	22.7341	40.9189	22.6423
rs142057772	A	G	A	G	-0.1893	-0.0017	0.03	0.0251	Prostate cancer	12	17251217	0.0264	0.9485	GCST90274798	12	17251217	0.0363	1.84e-07	Interleukin-12 subunit beta levels	0.00184333	2.96e-08	7.84e-07	0.00208557	30.7763	40.9189	27.1949
rs148549227	T	C	T	C	0.1088	-0.0252	0.0889	0.0918	Prostate cancer	3	171348710	0.0146	0.0838205	GCST90274798	3	171348710	0.0228	1.82e-06	Interleukin-12 subunit beta levels	0.00183288	2.12e-05	4.49e-05	0.00191759	23.8257	40.9189	22.7713
rs2249989	C	G	C	G	-0.0669	-0.0085	0.2514	0.2563	Prostate cancer	10	73105421	0.01	0.3961	GCST90274798	10	73105421	0.0138	1.25e-06	Interleukin-12 subunit beta levels	0.00164259	5.15e-06	1.31e-05	0.0016846	24.1035	40.9189	23.5014
rs568297	T	C	T	C	-0.0699	-0.0023	0.6522	0.6455	Prostate cancer	12	121221763	0.0084	0.788401	GCST90274798	12	121221763	0.0122	1.01e-08	Interleukin-12 subunit beta levels	0.0022247	5.35e-07	8.14e-08	0.00221664	32.7081	40.9189	32.8273
rs61938962	T	C	T	C	0.0713	0.0102	0.3226	0.3267	Prostate cancer	12	56446766	0.0085	0.2339	GCST90274798	12	56446766	0.0125	1.17e-08	Interleukin-12 subunit beta levels	0.00220393	1.03e-05	4.32e-07	0.00222187	32.801	40.9189	32.5356
rs6870256	T	C	T	C	0.0725	0.0011	0.5786	0.5667	Prostate cancer	5	158847071	0.0085	0.8927	GCST90274798	5	158847071	0.0119	1.11e-09	Interleukin-12 subunit beta levels	0.00251627	1.19e-07	8.74e-09	0.00256318	37.8115	40.9189	37.1178
rs6968201	T	G	T	G	-0.0622	-0.007	0.5425	0.5336	Prostate cancer	7	6408796	0.0082	0.3891	GCST90274798	7	6408796	0.0119	1.72e-07	Interleukin-12 subunit beta levels	0.00190887	5.2e-06	2.38e-06	0.00192044	27.4863	40.9189	27.3204
rs73416208	A	G	A	G	-0.1477	-0.0086	0.0654	0.0593	Prostate cancer	22	37881211	0.0172	0.617701	GCST90274798	22	37881211	0.0246	1.92e-09	Interleukin-12 subunit beta levels	0.00244183	1.78e-06	2.78e-08	0.00266682	39.3793	40.9189	36.0488
rs76428106	T	C	T	C	-0.3406	-0.0406	0.9832	0.9865	Prostate cancer	13	28604007	0.0415	0.3288	GCST90274798	13	28604007	0.0535	1.94e-10	Interleukin-12 subunit beta levels	0.00292881	6.82e-06	7.53e-09	0.0038324	53.0828	40.9189	40.5305
rs8026767	A	G	A	G	-0.0743	-0.0178	0.2595	0.2535	Prostate cancer	15	80260554	0.0095	0.0603893	GCST90274798	15	80260554	0.0132	1.81e-08	Interleukin-12 subunit beta levels	0.00214603	2.5e-05	1.8e-06	0.00212163	31.3223	40.9189	31.6833
rs911263	T	C	T	C	0.0781	-0.0062	0.7185	0.7034	Prostate cancer	14	68753593	0.0087	0.4791	GCST90274798	14	68753593	0.0128	1.05e-09	Interleukin-12 subunit beta levels	0.00252055	3.62e-06	2.38e-08	0.00246739	36.4419	40.9189	37.2291
rs10446322	A	G	A	G	0.064	-0.0092	0.3961	0.4117	Prostate cancer	3	143068250	0.0083	0.2668	GCST90274799	3	143068250	0.0132	1.24e-06	Interleukin-13 levels	0.00199244	8.76e-06	1.38e-05	0.00195957	23.1192	40.9189	23.5078
rs10752781	T	G	T	G	0.0595	-0.0056	0.4904	0.4785	Prostate cancer	1	234425332	0.0081	0.485	GCST90274799	1	234425332	0.0134	8.98e-06	Interleukin-13 levels	0.00173532	3.41e-06	4.49e-05	0.00176947	20.1049	40.9189	19.7163
rs10893042	C	G	C	G	-0.0702	-0.006	0.6744	0.6576	Prostate cancer	11	123332970	0.0096	0.5305	GCST90274799	11	123332970	0.015	2.87e-06	Interleukin-13 levels	0.00192737	2.79e-06	1.5e-05	0.00216424	24.6001	40.9189	21.9024
rs10917637	A	G	A	G	0.0692	0.0026	0.3447	0.3481	Prostate cancer	1	162878651	0.0084	0.7546	GCST90274799	1	162878651	0.0136	3.61e-07	Interleukin-13 levels	0.00219484	6.83e-07	1.59e-06	0.00216333	25.5176	40.9189	25.8901
rs11251952	A	G	A	G	-0.1845	0.0161	0.0751	0.0282	Prostate cancer	10	3623961	0.0269	0.5488	GCST90274799	10	3623961	0.0397	3.36e-06	Interleukin-13 levels	0.00190062	2.55e-06	1.67e-05	0.00472887	53.8897	40.9189	21.5979
rs117322078	T	C	T	C	0.2081	-0.0663	0.9743	0.9821	Prostate cancer	22	37976432	0.036	0.0655405	GCST90274799	22	37976432	0.046	6.07e-06	Interleukin-13 levels	0.00173447	2.42e-05	0.000127572	0.0021687	25.6007	40.9189	20.4658
rs12146346	T	G	T	G	0.0734	0.0019	0.3902	0.387	Prostate cancer	10	53942324	0.0089	0.8283	GCST90274799	10	53942324	0.0155	2.19e-06	Interleukin-13 levels	0.00266694	3.25e-07	5.44e-06	0.00256388	21.5559	40.9189	22.4248
rs13021250	C	G	C	G	0.1112	-0.0204	0.9154	0.9101	Prostate cancer	2	8361137	0.0144	0.1559	GCST90274799	2	8361137	0.0248	7.33e-06	Interleukin-13 levels	0.00183892	1.43e-05	8.26e-05	0.00191523	20.941	40.9189	20.1051
rs13119159	A	G	A	G	0.0739	0.0045	0.4958	0.4873	Prostate cancer	4	40938582	0.0086	0.5992	GCST90274799	4	40938582	0.0132	2.16e-08	Interleukin-13 levels	0.00275583	1.95e-06	1.61e-07	0.00273041	31.0531	40.9189	31.343
rs13297881	T	G	T	G	0.1562	-0.0133	0.9494	0.9575	Prostate cancer	9	4934758	0.0237	0.5754	GCST90274799	9	4934758	0.035	8.09e-06	Interleukin-13 levels	0.00175297	2.25e-06	3.51e-05	0.00234418	26.6502	40.9189	19.9171
rs141538472	T	C	T	C	0.3156	-0.079	0.9803	0.9806	Prostate cancer	3	162592726	0.037	0.0327198	GCST90274799	3	162592726	0.0692	5.1e-06	Interleukin-13 levels	0.00228275	3.25e-05	9.98e-05	0.00384706	35.1087	40.9189	20.7999
rs141637150	T	C	T	C	0.206	0.0186	0.0279	0.0284	Prostate cancer	19	48502692	0.0301	0.536	GCST90274799	19	48502692	0.0466	9.84e-06	Interleukin-13 levels	0.00165656	2.72e-06	4.65e-05	0.00230186	27.1716	40.9189	19.5417
rs141726773	T	C	T	C	0.2093	-0.0365	0.9682	0.9767	Prostate cancer	13	41810092	0.0315	0.2458	GCST90274799	13	41810092	0.0446	2.69e-06	Interleukin-13 levels	0.00193792	9.57e-06	2.73e-05	0.00269749	30.6777	40.9189	22.0226
rs1472639	A	C	A	C	0.0677	-0.0125	0.2405	0.2425	Prostate cancer	6	55271616	0.0094	0.1864	GCST90274799	6	55271616	0.015	6.38e-06	Interleukin-13 levels	0.00172506	1.26e-05	7.4e-05	0.00167436	19.7705	40.9189	20.3702
rs149979178	A	G	A	G	0.1832	0.0184	0.9229	0.9204	Prostate cancer	7	61999529	0.0214	0.3906	GCST90274799	7	61999529	0.039	2.63e-06	Interleukin-13 levels	0.00318822	5.27e-06	1.1e-05	0.00477628	33.1097	40.9189	22.0659
rs181829077	A	C	A	C	0.448	-0.0126	0.9937	0.9905	Prostate cancer	1	210429399	0.0484	0.7951	GCST90274799	1	210429399	0.0997	7.01e-06	Interleukin-13 levels	0.00202436	4.83e-07	1.93e-05	0.00251294	25.0768	40.9189	20.1914
rs2073696	A	G	A	G	-0.0992	0.0086	0.112	0.1127	Prostate cancer	8	17271300	0.0143	0.5481	GCST90274799	8	17271300	0.0219	5.91e-06	Interleukin-13 levels	0.00173874	2.58e-06	2.89e-05	0.00195742	23.1036	40.9189	20.518
rs2485365	A	G	A	G	0.0579	-0.0033	0.4703	0.4729	Prostate cancer	6	159512373	0.0083	0.687999	GCST90274799	6	159512373	0.0129	7.18e-06	Interleukin-13 levels	0.00170809	1.13e-06	2.68e-05	0.00167029	19.6989	40.9189	20.1455
rs3119485	A	T	A	T	-0.1308	0.0059	0.094	0.099	Prostate cancer	21	14817382	0.0142	0.6801	GCST90274799	21	14817382	0.0293	8.04e-06	Interleukin-13 levels	0.00264275	1.23e-06	2.11e-05	0.00291408	21.9809	40.9189	19.9288
rs36038515	A	G	A	G	0.0892	0.0249	0.1389	0.1425	Prostate cancer	3	8912627	0.0115	0.0312802	GCST90274799	3	8912627	0.0197	5.96e-06	Interleukin-13 levels	0.00180436	3.34e-05	0.000168878	0.00190334	21.6288	40.9189	20.502
rs36107074	T	C	T	C	-0.0706	0.0046	0.2438	0.2411	Prostate cancer	11	11427220	0.0101	0.6522	GCST90274799	11	11427220	0.0159	8.99e-06	Interleukin-13 levels	0.00173544	1.48e-06	3.4e-05	0.00183785	20.8814	40.9189	19.7158
rs4260678	A	G	A	G	0.0713	0.0085	0.7649	0.767	Prostate cancer	5	33630839	0.0116	0.4626	GCST90274799	5	33630839	0.016	8.34e-06	Interleukin-13 levels	0.00168235	3.83e-06	4.61e-05	0.00182838	21.5851	40.9189	19.8582
rs55924857	T	C	T	C	-0.0934	-0.0031	0.8535	0.8514	Prostate cancer	15	57830694	0.0115	0.7892	GCST90274799	15	57830694	0.0183	3.33e-07	Interleukin-13 levels	0.00220455	5.18e-07	1.4e-06	0.00218155	25.7767	40.9189	26.049
rs562947263	T	C	T	C	-0.3126	-0.0311	0.9825	0.9874	Prostate cancer	10	35235195	0.0462	0.5008	GCST90274799	10	35235195	0.0705	9.25e-06	Interleukin-13 levels	0.00233538	3.23e-06	3.4e-05	0.0033603	28.3184	40.9189	19.6607
rs5756680	T	C	T	C	0.0848	-0.0008	0.177	0.1736	Prostate cancer	22	37842933	0.0108	0.9413	GCST90274799	22	37842933	0.0186	5.14e-06	Interleukin-13 levels	0.00209454	3.91e-08	1.16e-05	0.00209505	20.7909	40.9189	20.7858
rs59235092	A	G	A	G	0.2122	0.0257	0.0274	0.0234	Prostate cancer	16	79977921	0.0273	0.3473	GCST90274799	16	79977921	0.0439	1.34e-06	Interleukin-13 levels	0.00197917	6.32e-06	1.19e-05	0.00239997	28.3445	40.9189	23.3648
rs74647203	A	G	A	G	-0.2845	-0.0019	0.0136	0.0157	Prostate cancer	6	16610802	0.0384	0.9597	GCST90274799	6	16610802	0.0629	6.1e-06	Interleukin-13 levels	0.00173219	1.75e-08	1.5e-05	0.00217163	25.6593	40.9189	20.458
rs76219628	A	G	A	G	0.169	0.0046	0.0397	0.0349	Prostate cancer	7	154418309	0.0245	0.8514	GCST90274799	7	154418309	0.0357	2.2e-06	Interleukin-13 levels	0.00197192	2.51e-07	6.79e-06	0.00217771	24.7535	40.9189	22.4097
rs909357	A	G	A	G	-0.1099	-0.02	0.0772	0.0834	Prostate cancer	8	133902602	0.0152	0.1877	GCST90274799	8	133902602	0.0247	8.61e-06	Interleukin-13 levels	0.00167846	1.23e-05	9.38e-05	0.00172088	20.2983	40.9189	19.7971
rs9881117	A	G	A	G	-0.0656	-0.0006	0.3094	0.3129	Prostate cancer	3	123702960	0.0088	0.9498	GCST90274799	3	123702960	0.0141	3.28e-06	Interleukin-13 levels	0.00183272	3.31e-08	8.67e-06	0.00183901	21.7201	40.9189	21.6456
rs1004308	T	C	T	C	0.0727	-0.0203	0.1931	0.1816	Prostate cancer	9	124977274	0.0122	0.0941803	GCST90274800	9	124977274	0.0162	7.2e-06	Interleukin-15 receptor subunit alpha levels	0.00170653	1.97e-05	0.000120204	0.00164703	19.4356	40.9189	20.139
rs117428573	A	C	A	C	-0.3132	0.0869	0.0119	0.0098	Prostate cancer	8	27696981	0.0447	0.0521003	GCST90274800	8	27696981	0.0684	4.67e-06	Interleukin-15 receptor subunit alpha levels	0.00192781	2.69e-05	0.000100752	0.00230686	25.0989	40.9189	20.9668
rs117484888	A	G	A	G	0.3794	0.0015	0.0158	0.0103	Prostate cancer	21	15303777	0.0564	0.9782	GCST90274800	21	15303777	0.0799	2.05e-06	Interleukin-15 receptor subunit alpha levels	0.00302915	5.04e-09	3.86e-06	0.00447677	33.3715	40.9189	22.5476
rs12570881	A	T	A	T	-0.0867	-0.0232	0.8028	0.8117	Prostate cancer	10	5815194	0.0105	0.0268497	GCST90274800	10	5815194	0.0174	6.27e-07	Interleukin-15 receptor subunit alpha levels	0.00218424	3.48e-05	2.83e-05	0.00238003	27.0587	40.9189	24.8279
rs140982443	T	C	T	C	0.1794	-0.0019	0.963	0.9597	Prostate cancer	19	14884642	0.0248	0.9373	GCST90274800	19	14884642	0.0395	5.58e-06	Interleukin-15 receptor subunit alpha levels	0.00207844	4.18e-08	1.25e-05	0.00229352	22.7673	40.9189	20.6277
rs142180961	T	C	T	C	0.2488	0.0343	0.0166	0.0135	Prostate cancer	12	38055500	0.0358	0.3379	GCST90274800	12	38055500	0.0553	6.82e-06	Interleukin-15 receptor subunit alpha levels	0.00188432	6.55e-06	4.51e-05	0.00202101	21.7132	40.9189	20.2419
rs145793996	A	G	A	G	-0.2278	0.0157	0.9801	0.9778	Prostate cancer	11	37594094	0.0289	0.5883	GCST90274800	11	37594094	0.0492	3.66e-06	Interleukin-15 receptor subunit alpha levels	0.00181699	2.1e-06	1.75e-05	0.00202424	23.8878	40.9189	21.4377
rs17129907	A	G	A	G	-0.1381	0.0087	0.9503	0.9542	Prostate cancer	11	97047987	0.0216	0.686901	GCST90274800	11	97047987	0.0303	5.17e-06	Interleukin-15 receptor subunit alpha levels	0.00175913	1.16e-06	2.01e-05	0.0018015	21.2744	40.9189	20.7731
rs17635883	A	G	A	G	0.0937	0.0191	0.122	0.1124	Prostate cancer	7	51409710	0.0133	0.1502	GCST90274800	7	51409710	0.0211	8.96e-06	Interleukin-15 receptor subunit alpha levels	0.00173568	1.47e-05	0.000105667	0.00188089	21.3733	40.9189	19.7203
rs192538756	A	T	A	T	0.1159	0.0029	0.8743	0.8612	Prostate cancer	20	2629394	0.0133	0.8244	GCST90274800	20	2629394	0.0241	1.52e-06	Interleukin-15 receptor subunit alpha levels	0.00243909	3.39e-07	4.27e-06	0.00295252	28.0106	40.9189	23.1277
rs2228059	T	G	T	G	0.3692	-0.0048	0.5146	0.5088	Prostate cancer	10	6002368	0.0082	0.5576	GCST90274800	10	6002368	0.0127	8.39e-186	Interleukin-15 receptor subunit alpha levels	0.069345	2.44e-06	4.62e-166	0.0680962	828.784	40.9189	845.115
rs2836464	A	G	A	G	0.0796	0.0074	0.8384	0.8393	Prostate cancer	21	39896592	0.0115	0.5194	GCST90274800	21	39896592	0.0169	2.48e-06	Interleukin-15 receptor subunit alpha levels	0.00187827	2.95e-06	1.41e-05	0.00171692	20.2755	40.9189	22.1847
rs4459616	T	C	T	C	0.14	-0.0328	0.0658	0.0663	Prostate cancer	18	12175379	0.0176	0.0629202	GCST90274800	18	12175379	0.0294	1.92e-06	Interleukin-15 receptor subunit alpha levels	0.00228593	2.48e-05	3.76e-05	0.00240964	23.9058	40.9189	22.6757
rs4772056	C	G	C	G	0.0894	-0.0123	0.8608	0.8658	Prostate cancer	13	98893318	0.0125	0.3271	GCST90274800	13	98893318	0.0197	5.68e-06	Interleukin-15 receptor subunit alpha levels	0.00181245	6.9e-06	4.23e-05	0.00191534	21.7655	40.9189	20.5941
rs62144964	A	G	A	G	0.0852	-0.0073	0.1223	0.1183	Prostate cancer	2	31652761	0.0124	0.5551	GCST90274800	2	31652761	0.019	7.32e-06	Interleukin-15 receptor subunit alpha levels	0.00170406	2.47e-06	3.45e-05	0.00155841	18.3867	40.9189	20.1081
rs6751509	T	C	T	C	0.0577	0.0157	0.3704	0.3777	Prostate cancer	2	52233445	0.0083	0.0599404	GCST90274800	2	52233445	0.0128	6.55e-06	Interleukin-15 receptor subunit alpha levels	0.00172202	2.55e-05	0.000143692	0.00155281	18.3205	40.9189	20.3204
rs679874	A	G	A	G	0.0629	0.0057	0.7114	0.7063	Prostate cancer	6	153065996	0.009	0.5269	GCST90274800	6	153065996	0.0139	6.03e-06	Interleukin-15 receptor subunit alpha levels	0.00173573	2.86e-06	3.06e-05	0.00162458	19.1638	40.9189	20.4773
rs6845172	C	G	C	G	0.0778	0.0051	0.8203	0.8155	Prostate cancer	4	140657353	0.0105	0.6252	GCST90274800	4	140657353	0.0162	1.57e-06	Interleukin-15 receptor subunit alpha levels	0.0019557	1.68e-06	7.61e-06	0.00178447	21.0408	40.9189	23.0637
rs7137828	T	C	T	C	-0.0748	0.0192	0.5243	0.5179	Prostate cancer	12	111932800	0.0082	0.0187301	GCST90274800	12	111932800	0.0133	1.87e-08	Interleukin-15 receptor subunit alpha levels	0.002781	3.91e-05	1.88e-06	0.00279091	31.7431	40.9189	31.6301
rs7898286	T	G	T	G	-0.1967	0.0042	0.3975	0.3975	Prostate cancer	10	6009462	0.0083	0.611999	GCST90274800	10	6009462	0.0135	4.34e-48	Interleukin-15 receptor subunit alpha levels	0.0183737	1.83e-06	1.63e-43	0.0185325	214.164	40.9189	212.296
rs79638163	T	G	T	G	0.176	0.004	0.9701	0.972	Prostate cancer	1	235799305	0.0299	0.8924	GCST90274800	1	235799305	0.0398	9.77e-06	Interleukin-15 receptor subunit alpha levels	0.00165587	1.28e-07	2.57e-05	0.00179698	21.2245	40.9189	19.5551
rs9270551	A	G	A	G	0.0749	0.0083	0.7077	0.7187	Prostate cancer	6	32560501	0.0089	0.3563	GCST90274800	6	32560501	0.0153	9.81e-07	Interleukin-15 receptor subunit alpha levels	0.0021085	6.2e-06	8.52e-06	0.00232098	26.3858	40.9189	23.9652
rs115193412	T	C	T	C	0.1688	0.0344	0.0418	0.0345	Prostate cancer	3	63484616	0.0222	0.1215	GCST90274801	3	63484616	0.0349	1.32e-06	Interleukin-17A levels	0.0019826	1.71e-05	2.52e-05	0.00228248	26.94	40.9189	23.3934
rs12599620	T	C	T	C	-0.0726	0.0095	0.7391	0.7536	Prostate cancer	16	8011846	0.0094	0.3108	GCST90274801	16	8011846	0.0153	2.08e-06	Interleukin-17A levels	0.00198265	7.28e-06	1.82e-05	0.00203273	23.0859	40.9189	22.516
rs13092332	T	C	T	C	0.1668	-0.0265	0.0383	0.0323	Prostate cancer	3	163713211	0.0231	0.2501	GCST90274801	3	163713211	0.0373	7.75e-06	Interleukin-17A levels	0.00169556	9.38e-06	7.05e-05	0.00204956	24.1811	40.9189	19.9974
rs145734140	A	G	A	G	-0.3662	0.0019	0.985	0.9925	Prostate cancer	8	82998811	0.0617	0.9748	GCST90274801	8	82998811	0.0815	7.01e-06	Interleukin-17A levels	0.00246055	6.76e-09	1.31e-05	0.00396273	32.564	40.9189	20.1893
rs1462017	C	G	C	G	-0.0893	-0.0008	0.1776	0.1852	Prostate cancer	8	70106392	0.0106	0.9405	GCST90274801	8	70106392	0.017	1.5e-07	Interleukin-17A levels	0.0023385	4.06e-08	5.11e-07	0.00232948	27.4867	40.9189	27.5934
rs146575213	A	T	A	T	-0.4006	-0.0729	0.0103	0.011	Prostate cancer	19	16896917	0.0515	0.1567	GCST90274801	19	16896917	0.0904	9.36e-06	Interleukin-17A levels	0.00223314	1.43e-05	7.7e-05	0.00327184	28.8014	40.9189	19.6374
rs17448036	A	G	A	G	-0.0585	0.0145	0.5609	0.5542	Prostate cancer	3	189579511	0.0081	0.0726206	GCST90274801	3	189579511	0.0128	4.87e-06	Interleukin-17A levels	0.00176987	2.28e-05	0.000100285	0.00168574	19.8932	40.9189	20.8878
rs2429911	T	C	T	C	0.2309	0.0071	0.0251	0.015	Prostate cancer	17	2272057	0.0378	0.8508	GCST90274801	17	2272057	0.0486	2.02e-06	Interleukin-17A levels	0.00199497	2.52e-07	6.25e-06	0.00260923	29.5405	40.9189	22.5723
rs2693361	T	G	T	G	0.0884	0.0243	0.517	0.5088	Prostate cancer	17	43658721	0.0094	0.00986302	GCST90274801	17	43658721	0.0185	1.77e-06	Interleukin-17A levels	0.00286707	4.76e-05	5.17e-05	0.00390276	31.1133	40.9189	22.8329
rs28852438	A	G	A	G	-0.068	0.0029	0.2897	0.2883	Prostate cancer	7	6380998	0.0088	0.740699	GCST90274801	7	6380998	0.0148	4.34e-06	Interleukin-17A levels	0.0018591	7.74e-07	1.51e-05	0.001903	21.6097	40.9189	21.1103
rs33998516	A	C	A	C	-0.0802	-0.0058	0.7781	0.7818	Prostate cancer	1	96622380	0.0102	0.569	GCST90274801	1	96622380	0.0164	1.01e-06	Interleukin-17A levels	0.00210553	2.31e-06	5.45e-06	0.00222112	25.2302	40.9189	23.9145
rs34557923	T	G	T	G	0.2446	0.0132	0.9819	0.9819	Prostate cancer	10	67955765	0.0312	0.6728	GCST90274801	10	67955765	0.0517	2.23e-06	Interleukin-17A levels	0.00204728	1.28e-06	8.92e-06	0.00212661	23.2529	40.9189	22.3837
rs3895928	T	C	T	C	-0.1893	0.055	0.9682	0.9729	Prostate cancer	12	89686567	0.0346	0.112	GCST90274801	12	89686567	0.0418	5.93e-06	Interleukin-17A levels	0.00173785	1.8e-05	9.39e-05	0.0022066	26.0534	40.9189	20.5092
rs41270871	A	T	A	T	0.0923	0.0262	0.221	0.2223	Prostate cancer	6	32628224	0.0096	0.00654395	GCST90274801	6	32628224	0.0189	1.04e-06	Interleukin-17A levels	0.00272135	5.31e-05	4.6e-05	0.00293334	25.7129	40.9189	23.8495
rs4985487	T	G	T	G	-0.0615	-0.0067	0.6045	0.607	Prostate cancer	16	70109850	0.0084	0.4267	GCST90274801	16	70109850	0.0138	8.33e-06	Interleukin-17A levels	0.00174924	4.54e-06	4.76e-05	0.00180852	20.5349	40.9189	19.8606
rs56702825	A	G	A	G	0.1383	0.0305	0.9451	0.9481	Prostate cancer	8	504034	0.019	0.1077	GCST90274801	8	504034	0.0303	5.01e-06	Interleukin-17A levels	0.00176781	1.84e-05	8.28e-05	0.00198483	23.396	40.9189	20.8333
rs57876893	T	G	T	G	0.1915	-0.0178	0.0279	0.0264	Prostate cancer	14	23580861	0.029	0.539	GCST90274801	14	23580861	0.043	8.45e-06	Interleukin-17A levels	0.00168169	2.69e-06	4.04e-05	0.00198922	23.4678	40.9189	19.8336
rs75788494	T	C	T	C	-0.2432	0.0476	0.021	0.0189	Prostate cancer	2	13468626	0.0375	0.2042	GCST90274801	2	13468626	0.0525	3.61e-06	Interleukin-17A levels	0.00202568	1.15e-05	3.64e-05	0.00243197	25.7735	40.9189	21.459
rs77529534	T	C	T	C	-0.1279	-0.0288	0.9323	0.9371	Prostate cancer	9	27215497	0.0173	0.0954509	GCST90274801	9	27215497	0.0272	2.57e-06	Interleukin-17A levels	0.00187457	1.98e-05	5.09e-05	0.00206498	24.3613	40.9189	22.1107
rs77595989	T	G	T	G	0.1696	0.0048	0.9648	0.9613	Prostate cancer	12	118130693	0.024	0.8401	GCST90274801	12	118130693	0.0371	4.84e-06	Interleukin-17A levels	0.00177313	2.85e-07	1.47e-05	0.00195372	23.0305	40.9189	20.898
rs79982350	C	G	C	G	-0.1467	-0.0409	0.0555	0.0503	Prostate cancer	9	31560030	0.0204	0.0449997	GCST90274801	9	31560030	0.0295	6.6e-07	Interleukin-17A levels	0.00217714	2.87e-05	2.3e-05	0.00225624	25.63	40.9189	24.7295
rs1072074	A	G	A	G	-0.0649	0.0033	0.5847	0.5855	Prostate cancer	4	24758319	0.0098	0.735201	GCST90274802	4	24758319	0.0141	4.17e-06	Interleukin-17C levels	0.0017948	8.08e-07	1.52e-05	0.00204557	24.1524	40.9189	21.1861
rs10870773	A	G	A	G	-0.0816	-0.0016	0.8025	0.8086	Prostate cancer	13	44396409	0.0104	0.8777	GCST90274802	13	44396409	0.0171	1.82e-06	Interleukin-17C levels	0.0020035	1.69e-07	5.46e-06	0.00211068	23.9921	40.9189	22.7713
rs111268024	A	C	A	C	0.3672	-0.0349	0.0207	0.0208	Prostate cancer	9	107469519	0.0422	0.4083	GCST90274802	9	107469519	0.0763	1.49e-06	Interleukin-17C levels	0.00309756	4.88e-06	6.76e-06	0.00546665	40.9724	40.9189	23.1609
rs113334480	T	C	T	C	-0.0962	-0.0233	0.8992	0.909	Prostate cancer	3	184205438	0.015	0.12	GCST90274802	3	184205438	0.0217	9.29e-06	Interleukin-17C levels	0.00166472	1.72e-05	0.000131269	0.00167763	19.8058	40.9189	19.6531
rs113702571	T	C	T	C	-0.2558	0.0287	0.9848	0.9839	Prostate cancer	8	118629302	0.0346	0.4081	GCST90274802	8	118629302	0.0564	5.75e-06	Interleukin-17C levels	0.00174258	4.91e-06	3.73e-05	0.00195895	23.1295	40.9189	20.5704
rs114882743	A	T	A	T	-0.3259	-0.0014	0.9804	0.9873	Prostate cancer	1	176930254	0.04	0.9722	GCST90274802	1	176930254	0.0548	2.73e-09	Interleukin-17C levels	0.00310833	8.73e-09	1.15e-08	0.00408186	46.4903	40.9189	35.3678
rs12092228	T	G	T	G	0.1508	0.0064	0.0512	0.0557	Prostate cancer	1	242536005	0.0197	0.746799	GCST90274802	1	242536005	0.0327	4e-06	Interleukin-17C levels	0.00214574	7.53e-07	1.23e-05	0.00220942	21.8995	40.9189	21.267
rs12863903	T	C	T	C	-0.0857	0.0191	0.1597	0.1635	Prostate cancer	13	96638651	0.0114	0.0940698	GCST90274802	13	96638651	0.018	1.93e-06	Interleukin-17C levels	0.00199444	2e-05	3.8e-05	0.0019712	22.4035	40.9189	22.6682
rs12895022	T	C	T	C	0.1091	0.0065	0.0906	0.0856	Prostate cancer	14	102333234	0.0147	0.658	GCST90274802	14	102333234	0.0236	3.78e-06	Interleukin-17C levels	0.00181212	1.39e-06	1.59e-05	0.00196138	23.1348	40.9189	21.371
rs139152046	T	G	T	G	-0.2421	0.0008	0.0211	0.0199	Prostate cancer	12	23245149	0.0301	0.9789	GCST90274802	12	23245149	0.0536	6.28e-06	Interleukin-17C levels	0.00216107	5.04e-09	1.28e-05	0.00242125	22.8636	40.9189	20.4014
rs139637682	T	C	T	C	-0.3301	0.1433	0.9817	0.992	Prostate cancer	2	111999407	0.0629	0.0226199	GCST90274802	2	111999407	0.0737	7.5e-06	Interleukin-17C levels	0.00235846	3.7e-05	0.000142822	0.00391517	33.3547	40.9189	20.0612
rs149756404	A	C	A	C	-0.2749	-0.0279	0.9809	0.9814	Prostate cancer	2	239715033	0.0323	0.3875	GCST90274802	2	239715033	0.0524	1.55e-07	Interleukin-17C levels	0.0024297	5.32e-06	1.52e-06	0.00283164	32.0884	40.9189	27.5224
rs17700884	T	G	T	G	-0.105	0.0125	0.3783	0.3749	Prostate cancer	16	88684495	0.0086	0.1481	GCST90274802	16	88684495	0.0136	1.16e-14	Interleukin-17C levels	0.00503756	1.51e-05	2.48e-12	0.00518592	61.3721	40.9189	59.6075
rs1920106	T	C	T	C	0.0633	0.0158	0.3948	0.3967	Prostate cancer	7	21240100	0.0082	0.05365	GCST90274802	7	21240100	0.0132	1.62e-06	Interleukin-17C levels	0.0019467	2.65e-05	4.75e-05	0.00191476	22.6183	40.9189	22.9964
rs2408771	T	G	T	G	0.0625	0.0024	0.4358	0.422	Prostate cancer	5	126053775	0.0092	0.7925	GCST90274802	5	126053775	0.0138	5.93e-06	Interleukin-17C levels	0.00180505	4.85e-07	1.84e-05	0.00192092	21.831	40.9189	20.5117
rs2770113	A	G	A	G	0.0604	0.0031	0.4998	0.495	Prostate cancer	6	158194819	0.0085	0.7199	GCST90274802	6	158194819	0.0135	7.67e-06	Interleukin-17C levels	0.00176162	9.48e-07	2.64e-05	0.00182408	20.7283	40.9189	20.0173
rs2814092	C	G	C	G	0.0624	0.0109	0.6437	0.6463	Prostate cancer	6	66547346	0.0084	0.1933	GCST90274802	6	66547346	0.0135	3.8e-06	Interleukin-17C levels	0.00180885	1.2e-05	4.57e-05	0.00178607	21.0954	40.9189	21.3649
rs39779	C	G	C	G	0.1077	-0.0109	0.1032	0.0967	Prostate cancer	16	8393906	0.0139	0.4318	GCST90274802	16	8393906	0.0227	2.09e-06	Interleukin-17C levels	0.00198057	4.38e-06	1.38e-05	0.00214702	24.4061	40.9189	22.5102
rs541607428	A	G	A	G	0.3402	-0.0453	0.0121	0.0133	Prostate cancer	1	86710244	0.0379	0.232	GCST90274802	1	86710244	0.0755	6.61e-06	Interleukin-17C levels	0.0025635	1.02e-05	4.02e-05	0.00276692	21.9193	40.9189	20.3037
rs554604740	A	G	A	G	0.1926	0.029	0.0286	0.0259	Prostate cancer	12	52750252	0.0259	0.2632	GCST90274802	12	52750252	0.0401	1.56e-06	Interleukin-17C levels	0.00206523	8.94e-06	1.58e-05	0.00206114	23.0229	40.9189	23.0687
rs59356989	A	G	A	G	-0.0882	-0.0009	0.8432	0.8475	Prostate cancer	5	107423766	0.011	0.9384	GCST90274802	5	107423766	0.0177	6.26e-07	Interleukin-17C levels	0.00210202	4.77e-08	1.92e-06	0.00205704	24.2984	40.9189	24.8308
rs5992909	T	C	T	C	0.0828	-0.0069	0.4646	0.4895	Prostate cancer	22	17005246	0.0095	0.4669	GCST90274802	22	17005246	0.0186	8.52e-06	Interleukin-17C levels	0.00287333	3.76e-06	2.83e-05	0.00341074	23.5359	40.9189	19.8169
rs6874610	T	G	T	G	-0.0649	-0.018	0.2795	0.2949	Prostate cancer	5	39436460	0.0091	0.0493401	GCST90274802	5	39436460	0.0144	6.58e-06	Interleukin-17C levels	0.00172121	2.79e-05	0.000158861	0.00169643	20.0196	40.9189	20.3125
rs72815428	T	C	T	C	-0.1673	0.0121	0.0423	0.0301	Prostate cancer	5	174836306	0.0268	0.6529	GCST90274802	5	174836306	0.0366	4.85e-06	Interleukin-17C levels	0.00177163	1.45e-06	2.01e-05	0.00226773	26.7587	40.9189	20.8944
rs73181003	A	G	A	G	-0.1122	0.0037	0.093	0.0859	Prostate cancer	22	46922217	0.0156	0.8151	GCST90274802	22	46922217	0.0246	5.09e-06	Interleukin-17C levels	0.00183059	4.01e-07	1.56e-05	0.00212376	24.1411	40.9189	20.8025
rs7324443	C	G	C	G	0.0637	-0.0124	0.3575	0.3838	Prostate cancer	13	30065064	0.0095	0.1932	GCST90274802	13	30065064	0.014	5.36e-06	Interleukin-17C levels	0.00182181	1.21e-05	5.87e-05	0.00186405	21.1834	40.9189	20.7025
rs75246422	T	C	T	C	-0.0951	-0.0061	0.1233	0.114	Prostate cancer	5	174179760	0.0128	0.631899	GCST90274802	5	174179760	0.0201	2.23e-06	Interleukin-17C levels	0.00189494	1.62e-06	1.03e-05	0.00195526	23.0997	40.9189	22.3856
rs75360344	A	G	A	G	-0.1414	0.0074	0.0498	0.0449	Prostate cancer	7	35414652	0.02	0.711001	GCST90274802	7	35414652	0.031	5.08e-06	Interleukin-17C levels	0.00176424	9.76e-07	1.9e-05	0.00189223	22.3175	40.9189	20.8054
rs7559734	T	C	T	C	-0.0915	0.0118	0.8803	0.8829	Prostate cancer	2	212465664	0.0132	0.3723	GCST90274802	2	212465664	0.0206	8.92e-06	Interleukin-17C levels	0.0017363	5.7e-06	5.66e-05	0.0017644	20.049	40.9189	19.7291
rs77223587	T	G	T	G	-0.3175	0.0017	0.9893	0.9885	Prostate cancer	15	46123423	0.0424	0.9683	GCST90274802	15	46123423	0.0705	6.68e-06	Interleukin-17C levels	0.00196107	1.15e-08	1.46e-05	0.00213417	22.076	40.9189	20.2819
rs77654242	T	G	T	G	-0.2174	0.0012	0.9707	0.9735	Prostate cancer	2	136675328	0.0289	0.967	GCST90274802	2	136675328	0.0469	3.56e-06	Interleukin-17C levels	0.00208338	1.23e-08	8.14e-06	0.00268845	27.7441	40.9189	21.4869
rs78289993	A	G	A	G	0.1577	-0.0083	0.961	0.9641	Prostate cancer	8	14156196	0.0218	0.704099	GCST90274802	8	14156196	0.0351	7.03e-06	Interleukin-17C levels	0.00171021	1.03e-06	2.58e-05	0.00186415	22.0063	40.9189	20.1859
rs79340054	T	C	T	C	0.138	-0.0145	0.9508	0.9486	Prostate cancer	10	19368604	0.0205	0.4788	GCST90274802	10	19368604	0.0309	7.97e-06	Interleukin-17C levels	0.00169058	3.57e-06	4.29e-05	0.00178173	21.0227	40.9189	19.9453
rs79599491	T	C	T	C	-0.1905	-0.0084	0.9711	0.9745	Prostate cancer	15	42484321	0.0271	0.757501	GCST90274802	15	42484321	0.0419	5.45e-06	Interleukin-17C levels	0.00182531	6.85e-07	1.81e-05	0.00203696	23.0728	40.9189	20.671
rs8015296	C	G	C	G	-0.1162	-0.0399	0.0991	0.1005	Prostate cancer	14	92763907	0.0143	0.00531202	GCST90274802	14	92763907	0.0253	4.37e-06	Interleukin-17C levels	0.00222515	5.55e-05	0.000182381	0.00241097	22.8605	40.9189	21.0946
rs112338272	A	C	A	C	-0.1954	0.0457	0.0236	0.0279	Prostate cancer	9	20069041	0.0276	0.0979603	GCST90274803	9	20069041	0.0425	4.27e-06	Interleukin-18 levels	0.00143407	1.95e-05	0.000112278	0.00175962	25.9455	40.9189	21.1384
rs113552426	C	G	C	G	-0.278	0.0034	0.9792	0.9886	Prostate cancer	16	84730435	0.0477	0.9429	GCST90274803	16	84730435	0.0581	1.71e-06	Interleukin-18 levels	0.0020315	3.62e-08	4.59e-06	0.00314814	35.519	40.9189	22.8948
rs113841145	A	G	A	G	0.2866	-0.0353	0.9893	0.9902	Prostate cancer	11	116331456	0.0433	0.4159	GCST90274803	11	116331456	0.0629	5.2e-06	Interleukin-18 levels	0.00150141	4.74e-06	4.09e-05	0.00173898	24.0519	40.9189	20.7611
rs115120333	T	C	T	C	-0.1967	-0.0823	0.9795	0.9842	Prostate cancer	1	78975194	0.0341	0.01588	GCST90274803	1	78975194	0.0443	8.99e-06	Interleukin-18 levels	0.00133565	4.15e-05	0.000504404	0.00155381	22.9403	40.9189	19.7152
rs11605127	C	G	C	G	-0.0629	-0.0087	0.7543	0.7529	Prostate cancer	11	268430	0.0097	0.3675	GCST90274803	11	268430	0.0137	4.41e-06	Interleukin-18 levels	0.00142921	5.74e-06	4.31e-05	0.00146649	21.6303	40.9189	21.0795
rs11918804	A	C	A	C	-0.1184	0.0089	0.9337	0.9361	Prostate cancer	3	196038580	0.0176	0.6137	GCST90274803	3	196038580	0.0266	8.54e-06	Interleukin-18 levels	0.00167778	1.82e-06	3.58e-05	0.00173562	20.4968	40.9189	19.8125
rs12201187	A	T	A	T	0.0676	-0.0074	0.2767	0.2616	Prostate cancer	6	162785078	0.009	0.4088	GCST90274803	6	162785078	0.0138	9.65e-07	Interleukin-18 levels	0.00180868	4.82e-06	9.02e-06	0.00182916	24.2679	40.9189	23.9958
rs12681624	C	G	C	G	-0.0935	0.0056	0.8179	0.8309	Prostate cancer	8	144606172	0.0108	0.6058	GCST90274803	8	144606172	0.0157	2.59e-09	Interleukin-18 levels	0.00259063	1.92e-06	3.24e-08	0.00260413	35.6523	40.9189	35.467
rs12711729	T	C	T	C	-0.0702	0.0106	0.7336	0.7463	Prostate cancer	2	126751021	0.0091	0.2445	GCST90274803	2	126751021	0.0153	4.47e-06	Interleukin-18 levels	0.0018525	9.67e-06	4.26e-05	0.00192618	21.8909	40.9189	21.0519
rs139760701	A	T	A	T	-0.3049	0.0231	0.989	0.9864	Prostate cancer	3	115001900	0.0354	0.514801	GCST90274803	3	115001900	0.0604	4.46e-07	Interleukin-18 levels	0.00184222	3.04e-06	3.85e-06	0.00202271	27.9842	40.9189	25.4824
rs1403742	A	T	A	T	-0.0567	-0.0126	0.371	0.3643	Prostate cancer	20	51289816	0.0084	0.1324	GCST90274803	20	51289816	0.0124	4.82e-06	Interleukin-18 levels	0.00146061	1.6e-05	9.67e-05	0.00150045	21.4796	40.9189	20.9085
rs144626837	T	C	T	C	0.2026	-0.0027	0.9792	0.9855	Prostate cancer	2	125030834	0.0382	0.9446	GCST90274803	2	125030834	0.0458	9.71e-06	Interleukin-18 levels	0.00132588	3.56e-08	2.85e-05	0.00167203	24.6853	40.9189	19.5681
rs148504635	A	C	A	C	0.2532	0.012	0.9857	0.989	Prostate cancer	16	54161464	0.0419	0.774701	GCST90274803	16	54161464	0.0525	1.42e-06	Interleukin-18 levels	0.00157606	5.85e-07	6.85e-06	0.00180733	26.6793	40.9189	23.26
rs17229943	A	C	A	C	-0.16	-0.0246	0.9351	0.9428	Prostate cancer	5	68682536	0.0193	0.2021	GCST90274803	5	68682536	0.0267	2.07e-09	Interleukin-18 levels	0.00242999	1.16e-05	1.13e-07	0.00310722	45.9495	40.9189	35.9102
rs2108621	T	C	T	C	0.0581	0.0082	0.3565	0.3463	Prostate cancer	19	5344989	0.0092	0.3721	GCST90274803	19	5344989	0.0126	4.01e-06	Interleukin-18 levels	0.00148529	5.66e-06	3.78e-05	0.00154878	22.1726	40.9189	21.2623
rs35495214	T	C	T	C	0.1374	0.0017	0.0465	0.0425	Prostate cancer	11	112433719	0.0211	0.9355	GCST90274803	11	112433719	0.0291	2.34e-06	Interleukin-18 levels	0.00151091	4.63e-08	7.99e-06	0.00167408	24.7056	40.9189	22.294
rs385076	T	C	T	C	-0.1857	0.001	0.3734	0.364	Prostate cancer	2	32489851	0.0084	0.9013	GCST90274803	2	32489851	0.0123	1.68e-51	Interleukin-18 levels	0.015696	1.01e-07	1.96e-46	0.0161368	234.443	40.9189	227.936
rs4140444	A	G	A	G	0.2157	-0.0202	0.0204	0.0155	Prostate cancer	6	38300402	0.0348	0.5626	GCST90274803	6	38300402	0.0461	2.88e-06	Interleukin-18 levels	0.00148315	2.4e-06	1.95e-05	0.00185956	27.4591	40.9189	21.8927
rs4612182	A	G	A	G	-0.0547	0.0149	0.5914	0.6042	Prostate cancer	6	138336137	0.0091	0.1002	GCST90274803	6	138336137	0.0123	8.7e-06	Interleukin-18 levels	0.00133985	1.91e-05	0.000195797	0.00144605	21.3471	40.9189	19.7772
rs56266057	T	G	T	G	0.0796	0.0148	0.8662	0.8653	Prostate cancer	10	17082153	0.0125	0.2379	GCST90274803	10	17082153	0.018	9.77e-06	Interleukin-18 levels	0.00136636	1e-05	0.000117341	0.00146869	21.0229	40.9189	19.556
rs56836641	T	C	T	C	-0.163	0.0144	0.0477	0.0388	Prostate cancer	7	155637974	0.0238	0.543501	GCST90274803	7	155637974	0.0301	6.12e-08	Interleukin-18 levels	0.00198542	2.61e-06	6.95e-07	0.00241378	35.6676	40.9189	29.3253
rs5744249	A	C	A	C	0.2039	0.0032	0.7618	0.7566	Prostate cancer	11	112025306	0.0094	0.731301	GCST90274803	11	112025306	0.0135	1.53e-51	Interleukin-18 levels	0.0152405	8.26e-07	6.38e-46	0.0150885	225.812	40.9189	228.122
rs60235102	T	C	T	C	0.1154	0.0398	0.9237	0.9241	Prostate cancer	11	105060888	0.0156	0.0109499	GCST90274803	11	105060888	0.0225	2.91e-07	Interleukin-18 levels	0.00178387	4.64e-05	4.29e-05	0.00187714	27.6835	40.9189	26.3055
rs62351325	T	C	T	C	0.1557	0.0174	0.9627	0.9677	Prostate cancer	5	19698240	0.0248	0.4838	GCST90274803	5	19698240	0.0344	6.01e-06	Interleukin-18 levels	0.00138772	3.51e-06	4.35e-05	0.00174103	25.7111	40.9189	20.4861
rs67424072	T	G	T	G	-0.082	-0.0134	0.8341	0.828	Prostate cancer	7	11104167	0.0112	0.2322	GCST90274803	7	11104167	0.0165	6.71e-07	Interleukin-18 levels	0.00172487	1.02e-05	1.25e-05	0.0018609	26.6492	40.9189	24.6979
rs72766437	T	C	T	C	0.0637	-0.0024	0.2088	0.2058	Prostate cancer	5	83710370	0.0103	0.8171	GCST90274803	5	83710370	0.0143	8.41e-06	Interleukin-18 levels	0.00134512	3.87e-07	3.12e-05	0.00134068	19.7774	40.9189	19.843
rs77994606	A	G	A	G	-0.2314	-0.0519	0.9814	0.9842	Prostate cancer	18	28763724	0.0343	0.1307	GCST90274803	18	28763724	0.0472	9.46e-07	Interleukin-18 levels	0.00162783	1.63e-05	2.72e-05	0.00195486	28.873	40.9189	24.0349
rs7990672	T	G	T	G	-0.0568	0.0067	0.69	0.6924	Prostate cancer	13	90838056	0.0091	0.4579	GCST90274803	13	90838056	0.0128	9.1e-06	Interleukin-18 levels	0.0013758	3.87e-06	6.27e-05	0.00138018	19.7543	40.9189	19.6914
rs10171395	A	C	A	C	0.0912	-0.0106	0.1155	0.1006	Prostate cancer	2	104750692	0.0141	0.452	GCST90274804	2	104750692	0.019	1.59e-06	interleukin-18 receptor 1 levels	0.00160938	4.03e-06	1.41e-05	0.00169941	24.3311	40.9189	23.04
rs117195704	A	G	A	G	-0.1505	0.0129	0.0389	0.0332	Prostate cancer	10	61379709	0.0235	0.5817	GCST90274804	10	61379709	0.0313	1.52e-06	interleukin-18 receptor 1 levels	0.00156733	2.15e-06	1.06e-05	0.00169364	24.9863	40.9189	23.1198
rs117524772	A	C	A	C	0.2911	-0.0163	0.0232	0.0269	Prostate cancer	17	64361924	0.0288	0.5716	GCST90274804	17	64361924	0.0451	1.09e-10	interleukin-18 receptor 1 levels	0.00290632	2.28e-06	2.32e-09	0.00384068	55.1065	40.9189	41.6612
rs1812326	T	C	T	C	0.2401	-0.0101	0.3831	0.3859	Prostate cancer	2	102860411	0.0084	0.2269	GCST90274804	2	102860411	0.0117	1.39e-93	interleukin-18 receptor 1 levels	0.0277859	1.03e-05	5.6e-81	0.0272484	412.752	40.9189	421.127
rs35021151	A	G	A	G	-0.1646	0.0141	0.0317	0.0328	Prostate cancer	3	58414784	0.023	0.5392	GCST90274804	3	58414784	0.0342	1.49e-06	interleukin-18 receptor 1 levels	0.00156976	2.68e-06	1.14e-05	0.00166325	24.5456	40.9189	23.1637
rs35679975	T	C	T	C	0.0726	-0.0126	0.8161	0.8163	Prostate cancer	20	51194941	0.0107	0.2391	GCST90274804	20	51194941	0.0149	1.1e-06	interleukin-18 receptor 1 levels	0.00160981	9.89e-06	1.95e-05	0.00158208	23.3315	40.9189	23.7411
rs58933240	A	C	A	C	0.2921	0.0114	0.626	0.6263	Prostate cancer	2	102942920	0.0094	0.2264	GCST90274804	2	102942920	0.0144	1.75e-91	interleukin-18 receptor 1 levels	0.0320948	1.05e-05	2.04e-80	0.039952	516.396	40.9189	411.47
rs62257659	A	G	A	G	-0.2015	0.0058	0.9745	0.9786	Prostate cancer	3	79589418	0.0303	0.8485	GCST90274804	3	79589418	0.042	1.61e-06	interleukin-18 receptor 1 levels	0.00156069	2.61e-07	6.68e-06	0.00201791	29.7738	40.9189	23.0171
rs7149605	A	G	A	G	0.1075	-0.0371	0.0957	0.093	Prostate cancer	14	94854041	0.0146	0.0108901	GCST90274804	14	94854041	0.0203	1.19e-07	interleukin-18 receptor 1 levels	0.00190032	4.6e-05	2.11e-05	0.00200019	29.5199	40.9189	28.043
rs78199195	A	G	A	G	-0.0956	0.0064	0.8928	0.902	Prostate cancer	3	146882115	0.0141	0.6509	GCST90274804	3	146882115	0.0196	1.07e-06	interleukin-18 receptor 1 levels	0.00166172	1.47e-06	6.57e-06	0.00174942	25.0483	40.9189	23.7905
rs10057700	A	G	A	G	-0.0822	-0.0038	0.4388	0.4385	Prostate cancer	5	161958436	0.0101	0.7082	GCST90274805	5	161958436	0.0181	5.59e-06	Interleukin-1-alpha levels	0.00239665	1.01e-06	1.59e-05	0.00332781	28.6646	40.9189	20.6246
rs10063171	T	G	T	G	0.0775	-0.0148	0.1932	0.1825	Prostate cancer	5	67352803	0.0114	0.1939	GCST90274805	5	67352803	0.0175	9.49e-06	Interleukin-1-alpha levels	0.00172679	1.2e-05	9.49e-05	0.00187243	21.2695	40.9189	19.6122
rs10233998	T	G	T	G	0.131	0.0001	0.0604	0.0692	Prostate cancer	7	89060931	0.0175	0.9934	GCST90274805	7	89060931	0.0286	4.64e-06	Interleukin-1-alpha levels	0.00177739	2.33e-10	1.1e-05	0.00194784	22.9962	40.9189	20.9802
rs115494443	A	G	A	G	0.2658	-0.0585	0.0186	0.0087	Prostate cancer	1	116784131	0.0561	0.2969	GCST90274805	1	116784131	0.0565	2.55e-06	Interleukin-1-alpha levels	0.00203544	7.75e-06	2.13e-05	0.00257928	28.0602	40.9189	22.1316
rs115602471	T	C	T	C	0.2215	-0.0301	0.0311	0.0269	Prostate cancer	2	170964850	0.0302	0.3193	GCST90274805	2	170964850	0.0469	2.33e-06	Interleukin-1-alpha levels	0.00196341	7.08e-06	1.97e-05	0.00295677	33.6232	40.9189	22.305
rs117537822	T	C	T	C	0.2176	-0.0658	0.9755	0.9863	Prostate cancer	17	32073614	0.0427	0.1231	GCST90274805	17	32073614	0.0439	7.17e-07	Interleukin-1-alpha levels	0.00208026	1.69e-05	1.49e-05	0.00226329	26.7357	40.9189	24.5691
rs11759846	A	G	A	G	-0.3263	-0.0187	0.0799	0.0587	Prostate cancer	6	32586222	0.0171	0.2726	GCST90274805	6	32586222	0.0266	1.36e-34	Interleukin-1-alpha levels	0.0126065	8.53e-06	2.3e-30	0.0156547	187.441	40.9189	150.477
rs11878153	A	G	A	G	0.1116	0.0278	0.9015	0.8842	Prostate cancer	18	308555	0.0136	0.0417802	GCST90274805	18	308555	0.0221	4.42e-07	Interleukin-1-alpha levels	0.00215911	2.98e-05	1.88e-05	0.00221187	26.1247	40.9189	25.5002
rs12047801	T	C	T	C	0.0783	0.0091	0.174	0.1626	Prostate cancer	1	105113404	0.0108	0.4	GCST90274805	1	105113404	0.0171	4.67e-06	Interleukin-1-alpha levels	0.00177625	5.06e-06	3.16e-05	0.00176231	20.802	40.9189	20.9668
rs12529944	T	C	T	C	-0.0845	-0.0094	0.178	0.171	Prostate cancer	6	84066908	0.0114	0.4096	GCST90274805	6	84066908	0.0189	7.79e-06	Interleukin-1-alpha levels	0.0017599	4.85e-06	4.63e-05	0.00208947	23.74	40.9189	19.9889
rs13195317	T	C	T	C	-0.3251	0.0675	0.0358	0.0078	Prostate cancer	6	32656094	0.0452	0.1357	GCST90274805	6	32656094	0.0554	4.4e-09	Interleukin-1-alpha levels	0.00303845	1.59e-05	1.66e-07	0.00729649	83.049	40.9189	34.4361
rs16886503	A	T	A	T	0.2438	-0.0128	0.9824	0.9825	Prostate cancer	8	89744017	0.0316	0.684499	GCST90274805	8	89744017	0.0524	3.28e-06	Interleukin-1-alpha levels	0.00183364	1.17e-06	1.33e-05	0.00205541	24.2708	40.9189	21.6474
rs190042298	A	G	A	G	0.1502	0.0012	0.0497	0.051	Prostate cancer	3	147628690	0.0183	0.9479	GCST90274805	3	147628690	0.0339	9.39e-06	Interleukin-1-alpha levels	0.00197999	3.07e-08	2.01e-05	0.00213102	21.1314	40.9189	19.6309
rs2426634	A	G	A	G	-0.0896	-0.0108	0.1376	0.1371	Prostate cancer	20	55282711	0.0123	0.3766	GCST90274805	20	55282711	0.0198	6.03e-06	Interleukin-1-alpha levels	0.00173461	5.5e-06	4.12e-05	0.00190534	22.4973	40.9189	20.4779
rs4767214	T	C	T	C	0.062	0.0175	0.5326	0.5221	Prostate cancer	12	114539621	0.0081	0.0298298	GCST90274805	12	114539621	0.013	1.85e-06	Interleukin-1-alpha levels	0.00192878	3.33e-05	6.95e-05	0.00191383	22.569	40.9189	22.7456
rs523604	A	G	A	G	0.0754	0.0063	0.5264	0.5276	Prostate cancer	11	118755738	0.0089	0.4785	GCST90274805	11	118755738	0.0142	1.1e-07	Interleukin-1-alpha levels	0.00273304	3.57e-06	7.91e-07	0.00283466	29.2458	40.9189	28.1946
rs547199103	A	T	A	T	-0.3452	0.0082	0.0283	0.0308	Prostate cancer	6	32606006	0.0255	0.747599	GCST90274805	6	32606006	0.0647	9.53e-08	Interleukin-1-alpha levels	0.00357194	7.37e-07	3.18e-07	0.00655375	52.3867	40.9189	28.4664
rs565705003	A	G	A	G	0.4469	-0.0096	0.9892	0.9904	Prostate cancer	2	14051826	0.0553	0.8616	GCST90274805	2	14051826	0.1004	8.54e-06	Interleukin-1-alpha levels	0.00265101	2.15e-07	1.74e-05	0.00426735	31.9452	40.9189	19.8131
rs61098036	A	G	A	G	-0.0856	0.0049	0.8232	0.819	Prostate cancer	17	53509585	0.0111	0.6581	GCST90274805	17	53509585	0.0187	4.7e-06	Interleukin-1-alpha levels	0.00211443	1.39e-06	1.64e-05	0.00213287	21.1371	40.9189	20.9539
rs6702801	C	G	C	G	-0.077	0.0097	0.6598	0.6688	Prostate cancer	1	89516076	0.0091	0.2891	GCST90274805	1	89516076	0.0171	6.7e-06	Interleukin-1-alpha levels	0.00254687	8.1e-06	3.6e-05	0.00266169	21.1929	40.9189	20.2763
rs7138836	A	T	A	T	-0.0982	-0.0143	0.1141	0.1122	Prostate cancer	12	103893601	0.0131	0.278	GCST90274805	12	103893601	0.0207	2.1e-06	Interleukin-1-alpha levels	0.00190795	8.5e-06	2.13e-05	0.0019495	22.9963	40.9189	22.5052
rs72937918	T	C	T	C	-0.2056	0.0196	0.0233	0.0225	Prostate cancer	11	80672314	0.0309	0.525801	GCST90274805	11	80672314	0.0452	5.4e-06	Interleukin-1-alpha levels	0.00175481	2.87e-06	2.78e-05	0.00192395	22.6885	40.9189	20.6904
rs76012752	A	G	A	G	0.1568	0.0347	0.9527	0.9628	Prostate cancer	12	28953348	0.0236	0.1415	GCST90274805	12	28953348	0.0352	8.41e-06	Interleukin-1-alpha levels	0.00174707	1.54e-05	0.000103942	0.00221585	25.179	40.9189	19.843
rs76544453	T	C	T	C	-0.1609	0.0037	0.9585	0.9667	Prostate cancer	14	81651382	0.0278	0.8943	GCST90274805	14	81651382	0.0361	8.31e-06	Interleukin-1-alpha levels	0.00168267	1.26e-07	2.21e-05	0.0020596	24.3245	40.9189	19.8654
rs78267257	A	G	A	G	-0.1825	0.0632	0.0323	0.0285	Prostate cancer	14	83490781	0.0249	0.0112401	GCST90274805	14	83490781	0.0406	6.95e-06	Interleukin-1-alpha levels	0.00185013	4.59e-05	0.000265482	0.00208209	22.7442	40.9189	20.2057
rs10996419	T	C	T	C	-0.1222	0.0162	0.9188	0.9279	Prostate cancer	10	67202938	0.0165	0.3264	GCST90274806	10	67202938	0.0259	2.38e-06	Interleukin-2 levels	0.00188584	6.87e-06	2.07e-05	0.00222818	26.311	40.9189	22.2609
rs111783480	A	G	A	G	-0.1462	0.0492	0.1075	0.0187	Prostate cancer	4	14756774	0.0325	0.1305	GCST90274806	4	14756774	0.0329	8.84e-06	Interleukin-2 levels	0.00212729	1.63e-05	8.66e-05	0.00410149	38.1485	40.9189	19.7471
rs142641125	T	C	T	C	0.2095	0.0034	0.0287	0.0227	Prostate cancer	3	12396234	0.028	0.9043	GCST90274806	3	12396234	0.0419	5.73e-07	Interleukin-2 levels	0.00211649	1.05e-07	1.87e-06	0.002447	28.9135	40.9189	25
rs144129701	C	G	C	G	-0.2699	0.0452	0.9727	0.9834	Prostate cancer	14	55563894	0.0372	0.2248	GCST90274806	14	55563894	0.0576	2.79e-06	Interleukin-2 levels	0.00193262	1.05e-05	3e-05	0.00386881	44.0388	40.9189	21.9564
rs1671226	C	G	C	G	-0.0849	0.0063	0.2053	0.1958	Prostate cancer	19	55502846	0.0109	0.5643	GCST90274806	19	55502846	0.017	5.91e-07	Interleukin-2 levels	0.00219477	2.38e-06	3.42e-06	0.002352	26.7322	40.9189	24.9412
rs1943222	A	G	A	G	-0.0622	0.0013	0.6878	0.69	Prostate cancer	18	58028057	0.0091	0.8849	GCST90274806	18	58028057	0.0138	6.57e-06	Interleukin-2 levels	0.00172057	1.46e-07	1.8e-05	0.00166152	19.6169	40.9189	20.3153
rs201229721	A	C	A	C	-0.1468	0.0015	0.9396	0.9452	Prostate cancer	9	88775115	0.0178	0.9314	GCST90274806	9	88775115	0.0309	2.03e-06	Interleukin-2 levels	0.00243277	5.06e-08	4.69e-06	0.00244603	22.6935	40.9189	22.5702
rs28515912	A	C	A	C	-0.0723	0.0082	0.6969	0.6956	Prostate cancer	17	103299	0.0103	0.4291	GCST90274806	17	103299	0.0149	1.22e-06	Interleukin-2 levels	0.00219137	4.52e-06	8.09e-06	0.00220833	23.7279	40.9189	23.5453
rs36006983	T	C	T	C	-0.0728	0.008	0.7384	0.7432	Prostate cancer	16	77431739	0.0092	0.3807	GCST90274806	16	77431739	0.0153	1.95e-06	Interleukin-2 levels	0.00199269	5.39e-06	1.44e-05	0.00204749	23.2641	40.9189	22.6402
rs4703508	T	C	T	C	-0.1216	0.0078	0.9334	0.9348	Prostate cancer	5	35188802	0.0165	0.637101	GCST90274806	5	35188802	0.026	2.91e-06	Interleukin-2 levels	0.0018523	1.59e-06	1.31e-05	0.0018384	21.7091	40.9189	21.8736
rs6535212	T	G	T	G	-0.0646	0.0139	0.6861	0.6783	Prostate cancer	4	138235156	0.0094	0.1412	GCST90274806	4	138235156	0.0139	3.36e-06	Interleukin-2 levels	0.00182987	1.56e-05	5.11e-05	0.00179752	21.2165	40.9189	21.5991
rs72659067	A	G	A	G	0.3327	0.0686	0.0111	0.0089	Prostate cancer	8	62639773	0.0491	0.1622	GCST90274806	8	62639773	0.0736	6.17e-06	Interleukin-2 levels	0.0020437	1.39e-05	6.18e-05	0.00243003	24.3059	40.9189	20.4338
rs74852566	T	G	T	G	-0.1999	-0.0261	0.0244	0.0212	Prostate cancer	10	2293803	0.0283	0.3566	GCST90274806	10	2293803	0.0431	3.52e-06	Interleukin-2 levels	0.0018217	6.06e-06	2.71e-05	0.00190247	22.4671	40.9189	21.5115
rs75739108	T	C	T	C	0.1737	0.0075	0.039	0.036	Prostate cancer	3	137247468	0.0254	0.7683	GCST90274806	3	137247468	0.038	4.85e-06	Interleukin-2 levels	0.00183932	6.22e-07	1.6e-05	0.00226161	25.7025	40.9189	20.8945
rs7638939	A	T	A	T	0.0854	-0.0011	0.8293	0.8229	Prostate cancer	3	125991040	0.0112	0.9196	GCST90274806	3	125991040	0.0174	9.2e-07	Interleukin-2 levels	0.00204298	6.88e-08	2.8e-06	0.00206486	24.3475	40.9189	24.0889
rs77832761	A	G	A	G	0.1922	0.0496	0.0318	0.0275	Prostate cancer	13	85868678	0.0253	0.0495895	GCST90274806	13	85868678	0.0414	3.44e-06	Interleukin-2 levels	0.00182581	2.74e-05	9.17e-05	0.00227473	26.8642	40.9189	21.5529
rs77853517	T	C	T	C	-0.1048	-0.0145	0.8961	0.8985	Prostate cancer	3	64865615	0.0146	0.3193	GCST90274806	3	64865615	0.0217	1.37e-06	Interleukin-2 levels	0.00197522	7.03e-06	1.3e-05	0.00204515	24.1515	40.9189	23.324
rs77880908	T	C	T	C	-0.0886	0.0097	0.1258	0.1108	Prostate cancer	4	47700645	0.0132	0.4609	GCST90274806	4	47700645	0.0196	6.17e-06	Interleukin-2 levels	0.0017334	3.85e-06	3.53e-05	0.00172659	20.3536	40.9189	20.4341
rs79419497	A	G	A	G	0.2016	-0.0178	0.9733	0.9742	Prostate cancer	2	192579384	0.0276	0.5185	GCST90274806	2	192579384	0.0424	1.99e-06	Interleukin-2 levels	0.00191432	2.97e-06	1.16e-05	0.00211237	24.9512	40.9189	22.6073
rs79925007	T	G	T	G	0.1176	-0.0132	0.9036	0.9175	Prostate cancer	4	34713434	0.018	0.4619	GCST90274806	4	34713434	0.0255	3.99e-06	Interleukin-2 levels	0.00187217	3.83e-06	2.3e-05	0.00240934	27.3855	40.9189	21.2684
rs114209791	A	G	A	G	-0.2134	0.0185	0.9756	0.9827	Prostate cancer	2	52215130	0.0359	0.6052	GCST90274807	2	52215130	0.046	3.5e-06	Interleukin-20 levels	0.00182331	1.89e-06	1.63e-05	0.00216811	25.6001	40.9189	21.5215
rs114363239	T	C	T	C	-0.2372	-0.0022	0.0189	0.0167	Prostate cancer	1	41433965	0.0328	0.9473	GCST90274807	1	41433965	0.0487	1.11e-06	Interleukin-20 levels	0.0020098	3.21e-08	3.2e-06	0.00208658	24.6313	40.9189	23.7231
rs115191082	T	G	T	G	-0.2543	0.01	0.0149	0.0127	Prostate cancer	1	104640701	0.0393	0.7994	GCST90274807	1	104640701	0.0561	5.82e-06	Interleukin-20 levels	0.00181638	4.62e-07	1.79e-05	0.00189841	21.4776	40.9189	20.5479
rs117977288	T	G	T	G	-0.1546	-0.0086	0.9553	0.9572	Prostate cancer	16	80689313	0.0216	0.6895	GCST90274807	16	80689313	0.0316	9.96e-07	Interleukin-20 levels	0.00202742	1.13e-06	4.51e-06	0.00204125	24.0992	40.9189	23.9356
rs12498781	A	G	A	G	0.0635	0.0086	0.3202	0.3148	Prostate cancer	4	133183457	0.0086	0.3194	GCST90274807	4	133183457	0.0137	3.57e-06	Interleukin-20 levels	0.00182335	7.13e-06	3.01e-05	0.00175542	20.6817	40.9189	21.4836
rs12969831	A	G	A	G	0.1474	0.0148	0.9399	0.9445	Prostate cancer	18	74247282	0.0242	0.5403	GCST90274807	18	74247282	0.0331	8.46e-06	Interleukin-20 levels	0.00174661	2.67e-06	3.87e-05	0.0024546	27.8889	40.9189	19.8307
rs13421547	T	C	T	C	0.147	0.0544	0.044	0.0427	Prostate cancer	2	13940522	0.0202	0.00702199	GCST90274807	2	13940522	0.0325	6.09e-06	Interleukin-20 levels	0.00173339	5.17e-05	0.00032665	0.00181792	21.4578	40.9189	20.4582
rs138771212	A	G	A	G	-0.3596	0.1487	0.9909	0.9913	Prostate cancer	8	68839107	0.0542	0.00604296	GCST90274807	8	68839107	0.0778	3.8e-06	Interleukin-20 levels	0.00188139	5.37e-05	0.000220563	0.00233206	26.4934	40.9189	21.3639
rs143409618	T	C	T	C	-0.2247	0.0042	0.0541	0.0149	Prostate cancer	13	112575760	0.0376	0.9121	GCST90274807	13	112575760	0.0504	8.26e-06	Interleukin-20 levels	0.0016842	8.9e-08	2.14e-05	0.00516748	61.1995	40.9189	19.8767
rs146918864	T	C	T	C	-0.2551	-0.0799	0.0228	0.0162	Prostate cancer	2	141913966	0.0347	0.02117	GCST90274807	2	141913966	0.0515	7.29e-07	Interleukin-20 levels	0.00214093	3.78e-05	3.64e-05	0.00289981	33.2586	40.9189	24.5362
rs188205021	T	C	T	C	-0.222	0.031	0.0255	0.0244	Prostate cancer	11	100596026	0.028	0.2674	GCST90274807	11	100596026	0.0427	2e-07	Interleukin-20 levels	0.00229089	8.74e-06	2.82e-06	0.00244939	28.905	40.9189	27.0303
rs2285212	T	C	T	C	-0.1112	-0.0073	0.9158	0.9228	Prostate cancer	1	169461481	0.0151	0.628599	GCST90274807	1	169461481	0.0248	7.33e-06	Interleukin-20 levels	0.00177073	1.67e-06	2.92e-05	0.00190701	21.6553	40.9189	20.1051
rs28542561	T	C	T	C	-0.1753	-0.0213	0.965	0.9695	Prostate cancer	15	23769949	0.0271	0.431	GCST90274807	15	23769949	0.0372	2.45e-06	Interleukin-20 levels	0.00188282	4.4e-06	1.66e-05	0.00207582	24.4874	40.9189	22.2064
rs34172193	A	G	A	G	-0.2175	0.0203	0.02	0.0189	Prostate cancer	6	112451601	0.0332	0.5405	GCST90274807	6	112451601	0.0488	8.31e-06	Interleukin-20 levels	0.00181646	2.67e-06	3.67e-05	0.0018544	20.2803	40.9189	19.8646
rs34691354	C	G	C	G	0.0651	-0.0223	0.6659	0.6779	Prostate cancer	18	75094435	0.0089	0.01243	GCST90274807	18	75094435	0.0143	5.3e-06	Interleukin-20 levels	0.00182521	4.48e-05	0.000222206	0.00188572	21.4131	40.9189	20.7248
rs35508685	T	C	T	C	0.1688	0.0024	0.9672	0.9651	Prostate cancer	2	213241261	0.0226	0.9143	GCST90274807	2	213241261	0.0373	6.03e-06	Interleukin-20 levels	0.00173551	8.04e-08	1.59e-05	0.00180786	21.3352	40.9189	20.4799
rs383039	A	G	A	G	-0.0698	-0.0149	0.2136	0.2178	Prostate cancer	1	242399370	0.0098	0.1275	GCST90274807	1	242399370	0.0156	7.66e-06	Interleukin-20 levels	0.00169645	1.65e-05	0.000107547	0.00163676	19.3143	40.9189	20.0199
rs61992201	T	G	T	G	0.0888	0.0127	0.1397	0.1237	Prostate cancer	14	48507353	0.013	0.3298	GCST90274807	14	48507353	0.0201	9.97e-06	Interleukin-20 levels	0.0018978	6.8e-06	6.12e-05	0.00189541	19.4933	40.9189	19.5179
rs72633862	T	G	T	G	-0.1722	-0.0104	0.0444	0.0275	Prostate cancer	1	9746065	0.027	0.699301	GCST90274807	1	9746065	0.0376	4.65e-06	Interleukin-20 levels	0.00177856	1.06e-06	1.78e-05	0.00251626	29.6961	40.9189	20.9745
rs72659995	T	C	T	C	-0.1232	0.0247	0.9142	0.9266	Prostate cancer	14	21169862	0.0197	0.2096	GCST90274807	14	21169862	0.0267	3.95e-06	Interleukin-20 levels	0.001875	1.12e-05	4.24e-05	0.00238111	27.0519	40.9189	21.2911
rs73192044	A	G	A	G	-0.1066	-0.0019	0.9032	0.8998	Prostate cancer	3	119431497	0.0144	0.8955	GCST90274807	3	119431497	0.0237	6.86e-06	Interleukin-20 levels	0.0017818	1.24e-07	1.8e-05	0.00198703	22.5658	40.9189	20.231
rs113105910	A	G	A	G	-0.2425	0.0363	0.0165	0.016	Prostate cancer	11	5315973	0.0356	0.3077	GCST90274808	11	5315973	0.0538	6.56e-06	Interleukin-20 receptor subunit alpha levels	0.00172115	7.41e-06	5.26e-05	0.00190859	22.5338	40.9189	20.317
rs113153423	A	G	A	G	0.1913	-0.0255	0.972	0.9715	Prostate cancer	8	139987300	0.026	0.328	GCST90274808	8	139987300	0.0407	2.6e-06	Interleukin-20 receptor subunit alpha levels	0.00187031	6.86e-06	2.24e-05	0.00199198	23.5323	40.9189	22.0923
rs113563938	A	T	A	T	0.3176	0.0562	0.9871	0.9871	Prostate cancer	7	12560554	0.0389	0.1482	GCST90274808	7	12560554	0.0676	2.62e-06	Interleukin-20 receptor subunit alpha levels	0.00194238	1.49e-05	3.75e-05	0.00256887	29.2111	40.9189	22.0733
rs115680168	T	C	T	C	-0.3364	-0.0253	0.0177	0.0121	Prostate cancer	4	164735206	0.0472	0.5919	GCST90274808	4	164735206	0.0757	8.84e-06	Interleukin-20 receptor subunit alpha levels	0.00259712	2.05e-06	2.61e-05	0.00393513	29.962	40.9189	19.7479
rs11987533	A	G	A	G	0.1171	-0.0126	0.1374	0.1439	Prostate cancer	8	35154239	0.0129	0.327	GCST90274808	8	35154239	0.0198	3.34e-09	Interleukin-20 receptor subunit alpha levels	0.00307437	6.8e-06	6.02e-08	0.00325042	36.9865	40.9189	34.9771
rs12056343	T	G	T	G	-0.0761	0.0069	0.7494	0.7433	Prostate cancer	8	79840734	0.0095	0.4687	GCST90274808	8	79840734	0.0166	4.55e-06	Interleukin-20 receptor subunit alpha levels	0.00212006	3.76e-06	2.21e-05	0.00217517	21.5637	40.9189	21.0161
rs143067549	T	C	T	C	-0.4166	0.0309	0.0114	0.0084	Prostate cancer	5	46131995	0.0522	0.5534	GCST90274808	5	46131995	0.091	4.69e-06	Interleukin-20 receptor subunit alpha levels	0.0028577	2.5e-06	1.5e-05	0.00391196	28.7205	40.9189	20.9583
rs145607970	A	C	A	C	-0.2162	0.0158	0.0367	0.0348	Prostate cancer	6	32624017	0.024	0.5093	GCST90274808	6	32624017	0.048	6.66e-06	Interleukin-20 receptor subunit alpha levels	0.00269019	3.09e-06	2.26e-05	0.00330498	24.9392	40.9189	20.2875
rs149111746	A	G	A	G	0.2357	-0.0057	0.0208	0.0163	Prostate cancer	17	59389022	0.0422	0.8915	GCST90274808	17	59389022	0.0511	3.98e-06	Interleukin-20 receptor subunit alpha levels	0.00180265	1.3e-07	1.13e-05	0.002263	26.7208	40.9189	21.2754
rs188200783	T	C	T	C	-0.2004	0.0149	0.0429	0.0345	Prostate cancer	5	22203180	0.0257	0.561	GCST90274808	5	22203180	0.0449	8.07e-06	Interleukin-20 receptor subunit alpha levels	0.00221539	2.4e-06	2.88e-05	0.00329792	29.6868	40.9189	19.9206
rs2064077	T	C	T	C	0.1072	-0.0054	0.083	0.08	Prostate cancer	1	171216897	0.0154	0.7256	GCST90274808	1	171216897	0.0241	8.66e-06	Interleukin-20 receptor subunit alpha levels	0.00167566	8.77e-07	3e-05	0.00174931	20.657	40.9189	19.7859
rs2883991	T	C	T	C	0.08	0.0013	0.8477	0.8555	Prostate cancer	2	53038599	0.0114	0.9088	GCST90274808	2	53038599	0.0181	9.88e-06	Interleukin-20 receptor subunit alpha levels	0.00165463	9.27e-08	2.53e-05	0.00165254	19.5107	40.9189	19.5354
rs4667792	T	C	T	C	-0.0606	0.0047	0.5471	0.5537	Prostate cancer	2	166018354	0.0084	0.5754	GCST90274808	2	166018354	0.0135	7.16e-06	Interleukin-20 receptor subunit alpha levels	0.00177344	2.23e-06	3.14e-05	0.00181989	20.6788	40.9189	20.1501
rs544388667	A	G	A	G	0.3626	0.0111	0.0114	0.0119	Prostate cancer	3	113013852	0.0405	0.783401	GCST90274808	3	113013852	0.075	1.33e-06	Interleukin-20 receptor subunit alpha levels	0.00251811	5.36e-07	3.98e-06	0.00296354	27.521	40.9189	23.374
rs59446445	A	G	A	G	0.1741	0.0735	0.0321	0.028	Prostate cancer	5	154577444	0.0268	0.00617106	GCST90274808	5	154577444	0.038	4.61e-06	Interleukin-20 receptor subunit alpha levels	0.00177753	5.36e-05	0.000277662	0.00188349	22.2445	40.9189	20.9909
rs6842116	C	G	C	G	-0.0925	0.0217	0.8324	0.8481	Prostate cancer	4	6909807	0.0134	0.104	GCST90274808	4	6909807	0.0204	5.78e-06	Interleukin-20 receptor subunit alpha levels	0.00180945	1.87e-05	8.97e-05	0.00238737	27.1423	40.9189	20.56
rs74032581	A	T	A	T	-0.1343	-0.0381	0.9366	0.9475	Prostate cancer	16	83519341	0.0201	0.0574897	GCST90274808	16	83519341	0.0298	6.58e-06	Interleukin-20 receptor subunit alpha levels	0.00178753	2.56e-05	0.00013623	0.00214203	24.347	40.9189	20.3104
rs9817113	T	C	T	C	0.1541	0.002	0.0446	0.0448	Prostate cancer	3	151178393	0.0222	0.9301	GCST90274808	3	151178393	0.0346	8.44e-06	Interleukin-20 receptor subunit alpha levels	0.0016799	5.79e-08	2.13e-05	0.00202374	23.9043	40.9189	19.836
rs114416525	A	G	A	G	0.2819	0.0089	0.0142	0.01	Prostate cancer	3	99744651	0.0464	0.8472	GCST90274809	3	99744651	0.0619	5.26e-06	Interleukin-22 receptor subunit alpha-1 levels	0.0018251	2.62e-07	1.52e-05	0.00222483	25.2925	40.9189	20.74
rs11607326	A	T	A	T	-0.0919	-0.0065	0.1246	0.1225	Prostate cancer	11	83564435	0.0139	0.6414	GCST90274809	11	83564435	0.0206	8.15e-06	Interleukin-22 receptor subunit alpha-1 levels	0.00175149	1.56e-06	3.16e-05	0.00184241	20.937	40.9189	19.902
rs117263973	A	G	A	G	0.3467	0.0229	0.0109	0.0101	Prostate cancer	21	42295154	0.0464	0.6221	GCST90274809	21	42295154	0.0752	4.02e-06	Interleukin-22 receptor subunit alpha-1 levels	0.00195413	1.74e-06	1.65e-05	0.00259182	28.2099	40.9189	21.2555
rs117636462	A	G	A	G	0.3671	0.0257	0.9915	0.9918	Prostate cancer	20	16761823	0.0478	0.589899	GCST90274809	20	16761823	0.0828	9.27e-06	Interleukin-22 receptor subunit alpha-1 levels	0.00180739	2.06e-06	3.69e-05	0.00227149	24.7154	40.9189	19.6566
rs11777386	A	G	A	G	-0.1003	0.0119	0.0953	0.1	Prostate cancer	8	52767675	0.0133	0.372	GCST90274809	8	52767675	0.0224	7.55e-06	Interleukin-22 receptor subunit alpha-1 levels	0.00169954	5.71e-06	5.11e-05	0.00173472	20.4653	40.9189	20.0496
rs12240324	A	G	A	G	0.2203	0.0206	0.9713	0.9811	Prostate cancer	10	44669337	0.0306	0.5014	GCST90274809	10	44669337	0.047	2.77e-06	Interleukin-22 receptor subunit alpha-1 levels	0.00185983	3.23e-06	1.61e-05	0.00270579	31.9905	40.9189	21.9702
rs143949731	T	C	T	C	0.1655	0.0025	0.0384	0.0306	Prostate cancer	18	22333712	0.0251	0.9199	GCST90274809	18	22333712	0.0366	6.13e-06	Interleukin-22 receptor subunit alpha-1 levels	0.00173275	7.07e-08	1.6e-05	0.00202279	23.8768	40.9189	20.4472
rs17256492	T	C	T	C	-0.0751	-0.0021	0.7694	0.7906	Prostate cancer	14	62394907	0.0108	0.845	GCST90274809	14	62394907	0.0162	3.56e-06	Interleukin-22 receptor subunit alpha-1 levels	0.00189104	2.7e-07	1.06e-05	0.00200134	22.7467	40.9189	21.4907
rs187050106	T	C	T	C	0.4278	0.1221	0.0081	0.0071	Prostate cancer	13	56206816	0.055	0.02639	GCST90274809	13	56206816	0.0964	9.09e-06	Interleukin-22 receptor subunit alpha-1 levels	0.00231536	3.51e-05	0.000158622	0.00294079	25.0292	40.9189	19.6937
rs187651556	T	C	T	C	-0.3827	-0.0201	0.9838	0.9933	Prostate cancer	1	29484787	0.0589	0.733	GCST90274809	1	29484787	0.0859	8.38e-06	Interleukin-22 receptor subunit alpha-1 levels	0.00293192	8.3e-07	1.9e-05	0.00466841	31.6595	40.9189	19.8486
rs3181361	T	C	T	C	0.27	-0.0039	0.0163	0.0119	Prostate cancer	9	117667449	0.0487	0.9369	GCST90274809	9	117667449	0.0582	3.5e-06	Interleukin-22 receptor subunit alpha-1 levels	0.00189378	4.57e-08	9.05e-06	0.0023378	26.5798	40.9189	21.5219
rs369913010	T	C	T	C	-0.2141	-0.0019	0.0264	0.0278	Prostate cancer	12	131925456	0.0263	0.9428	GCST90274809	12	131925456	0.0484	9.71e-06	Interleukin-22 receptor subunit alpha-1 levels	0.00211234	3.72e-08	2e-05	0.00235639	21.834	40.9189	19.5678
rs4466	A	G	A	G	0.0906	-0.0105	0.1324	0.1363	Prostate cancer	22	35723831	0.0128	0.4108	GCST90274809	22	35723831	0.0203	8.08e-06	Interleukin-22 receptor subunit alpha-1 levels	0.00168662	4.8e-06	4.98e-05	0.00188579	22.2755	40.9189	19.9189
rs56282088	A	G	A	G	0.2815	0.0279	0.0165	0.012	Prostate cancer	8	81502336	0.0394	0.4783	GCST90274809	8	81502336	0.0571	8.23e-07	Interleukin-22 receptor subunit alpha-1 levels	0.00222134	3.58e-06	5.21e-06	0.00257185	28.1492	40.9189	24.3044
rs7158900	A	G	A	G	-0.0674	-0.0005	0.6092	0.6087	Prostate cancer	14	94197473	0.0086	0.9572	GCST90274809	14	94197473	0.0138	1.04e-06	Interleukin-22 receptor subunit alpha-1 levels	0.00209874	2.41e-08	2.87e-06	0.00216304	24.5864	40.9189	23.854
rs75590335	A	G	A	G	0.1722	0.045	0.0376	0.0389	Prostate cancer	4	157031745	0.0226	0.04617	GCST90274809	4	157031745	0.037	3.25e-06	Interleukin-22 receptor subunit alpha-1 levels	0.00190593	2.83e-05	8.48e-05	0.00214605	24.395	40.9189	21.6602
rs78594373	T	C	T	C	-0.1271	0.0036	0.0671	0.0698	Prostate cancer	2	85320044	0.0161	0.8243	GCST90274809	2	85320044	0.0273	3.23e-06	Interleukin-22 receptor subunit alpha-1 levels	0.00183897	3.56e-07	1.04e-05	0.00202245	23.8424	40.9189	21.6753
rs79229049	A	T	A	T	-0.2102	-0.0136	0.9695	0.9747	Prostate cancer	7	81154741	0.0281	0.6293	GCST90274809	7	81154741	0.0412	3.36e-07	Interleukin-22 receptor subunit alpha-1 levels	0.00220498	1.67e-06	1.9e-06	0.00261302	30.8594	40.9189	26.0298
rs11066309	A	G	A	G	0.0655	-0.0183	0.4172	0.4218	Prostate cancer	12	112883476	0.0083	0.02791	GCST90274810	12	112883476	0.0137	1.74e-06	Interleukin-24 levels	0.00201272	3.47e-05	6.49e-05	0.0020863	23.6955	40.9189	22.8582
rs11256610	A	G	A	G	0.3005	-0.007	0.0145	0.0124	Prostate cancer	10	6122343	0.0404	0.8625	GCST90274810	10	6122343	0.0641	2.76e-06	Interleukin-24 levels	0.00202183	2.14e-07	7.88e-06	0.00258074	28.0683	40.9189	21.9772
rs116790447	T	C	T	C	0.1729	-0.015	0.0521	0.054	Prostate cancer	1	18931322	0.021	0.4741	GCST90274810	1	18931322	0.0371	3.16e-06	Interleukin-24 levels	0.00229281	3.64e-06	1.49e-05	0.00295271	27.9887	40.9189	21.7191
rs117613902	A	G	A	G	-0.3	-0.0235	0.9862	0.9903	Prostate cancer	14	97741799	0.0487	0.628901	GCST90274810	14	97741799	0.0657	4.97e-06	Interleukin-24 levels	0.00191835	1.66e-06	1.97e-05	0.00244972	26.6398	40.9189	20.8503
rs12275648	T	C	T	C	-0.0696	0.0033	0.3114	0.3236	Prostate cancer	11	129057999	0.0087	0.7002	GCST90274810	11	129057999	0.0155	7.11e-06	Interleukin-24 levels	0.00195849	1.03e-06	2.3e-05	0.00207747	21.3904	40.9189	20.163
rs12588414	A	G	A	G	0.0753	-0.0059	0.2361	0.2394	Prostate cancer	14	104576816	0.0101	0.560701	GCST90274810	14	104576816	0.0169	8.37e-06	Interleukin-24 levels	0.00192915	2.43e-06	3.37e-05	0.00204528	21.0501	40.9189	19.8526
rs143986178	A	G	A	G	0.2969	0.1169	0.0144	0.0101	Prostate cancer	21	26067535	0.0457	0.0105801	GCST90274810	21	26067535	0.0644	4.02e-06	Interleukin-24 levels	0.00195546	4.67e-05	0.000173568	0.00250215	27.2114	40.9189	21.2544
rs145295031	A	T	A	T	0.3063	0.0099	0.014	0.0167	Prostate cancer	7	9959098	0.0349	0.7758	GCST90274810	7	9959098	0.0647	2.2e-06	Interleukin-24 levels	0.00198209	5.74e-07	7.63e-06	0.00259017	29.306	40.9189	22.4122
rs145450029	T	G	T	G	-0.2153	0.0397	0.0246	0.0188	Prostate cancer	11	76932037	0.0348	0.2537	GCST90274810	11	76932037	0.0484	8.65e-06	Interleukin-24 levels	0.00167668	9.28e-06	7.7e-05	0.00222452	26.2677	40.9189	19.7878
rs145660089	T	C	T	C	0.2004	0.0399	0.0274	0.0244	Prostate cancer	11	94477313	0.0325	0.22	GCST90274810	11	94477313	0.0446	7.01e-06	Interleukin-24 levels	0.00171138	1.07e-05	7.11e-05	0.00214048	25.2625	40.9189	20.1895
rs145891540	T	G	T	G	0.1913	0.0039	0.0315	0.0225	Prostate cancer	12	93849398	0.032	0.9041	GCST90274810	12	93849398	0.0422	5.81e-06	Interleukin-24 levels	0.00174289	1.06e-07	1.57e-05	0.0022329	26.3401	40.9189	20.5497
rs167018	A	G	A	G	0.0657	-0.0041	0.4443	0.4307	Prostate cancer	7	155623090	0.0086	0.631899	GCST90274810	7	155623090	0.0136	1.36e-06	Interleukin-24 levels	0.00205483	1.62e-06	6.34e-06	0.00213146	24.2096	40.9189	23.3374
rs2165910	A	G	A	G	0.0674	-0.0068	0.7371	0.7277	Prostate cancer	18	7919506	0.0096	0.4823	GCST90274810	18	7919506	0.015	7.01e-06	Interleukin-24 levels	0.00171303	3.58e-06	3.83e-05	0.00176063	20.752	40.9189	20.19
rs60306270	A	G	A	G	-0.0886	-0.0046	0.1398	0.1374	Prostate cancer	16	49575164	0.0131	0.724599	GCST90274810	16	49575164	0.0191	3.51e-06	Interleukin-24 levels	0.00182347	8.79e-07	1.32e-05	0.00188801	22.2809	40.9189	21.5179
rs61760504	C	G	C	G	0.12	-0.002	0.9234	0.9361	Prostate cancer	4	47684375	0.0172	0.909	GCST90274810	4	47684375	0.0265	5.95e-06	Interleukin-24 levels	0.00180578	9.64e-08	1.54e-05	0.00203709	23.1376	40.9189	20.5055
rs61997688	T	C	T	C	-0.0757	-0.0032	0.8019	0.8007	Prostate cancer	14	57398908	0.0105	0.7626	GCST90274810	14	57398908	0.017	8.47e-06	Interleukin-24 levels	0.00168185	6.62e-07	2.78e-05	0.00182065	21.4681	40.9189	19.8287
rs73169406	A	G	A	G	0.111	0.0136	0.1327	0.119	Prostate cancer	22	48661109	0.0136	0.3169	GCST90274810	22	48661109	0.0207	8.22e-08	Interleukin-24 levels	0.00253037	7.13e-06	1.05e-06	0.00283607	32.2382	40.9189	28.7545
rs76088721	T	C	T	C	0.1847	0.0283	0.9596	0.969	Prostate cancer	9	23373327	0.0263	0.2817	GCST90274810	9	23373327	0.0417	9.46e-06	Interleukin-24 levels	0.00227998	8.26e-06	5.36e-05	0.00264506	22.7681	40.9189	19.6183
rs111805691	A	G	A	G	-0.1278	0.0279	0.0648	0.0571	Prostate cancer	4	13099601	0.0195	0.1513	GCST90274811	4	13099601	0.0286	7.88e-06	Interleukin-2 receptor subunit beta levels	0.00175742	1.46e-05	9.41e-05	0.00197957	22.4968	40.9189	19.9678
rs115890206	A	G	A	G	0.232	0.0082	0.9786	0.9797	Prostate cancer	2	171243489	0.0388	0.833	GCST90274811	2	171243489	0.0502	3.81e-06	Interleukin-2 receptor subunit beta levels	0.00204929	3.18e-07	1.07e-05	0.00225437	23.5007	40.9189	21.3584
rs116007066	A	G	A	G	-0.2101	-0.0278	0.025	0.0268	Prostate cancer	4	136755243	0.0256	0.2767	GCST90274811	4	136755243	0.0441	1.9e-06	Interleukin-2 receptor subunit beta levels	0.00220027	8.41e-06	1.61e-05	0.00215192	22.1975	40.9189	22.6973
rs116068903	T	C	T	C	0.2831	-0.0585	0.0151	0.0144	Prostate cancer	1	67498721	0.0383	0.126	GCST90274811	1	67498721	0.0636	8.54e-06	Interleukin-2 receptor subunit beta levels	0.00188921	1.66e-05	0.000100311	0.00238385	25.0138	40.9189	19.8137
rs11630708	T	C	T	C	-0.2102	0.0514	0.9766	0.978	Prostate cancer	15	84665328	0.0301	0.08744	GCST90274811	15	84665328	0.0443	2.09e-06	Interleukin-2 receptor subunit beta levels	0.00190661	2.08e-05	4.5e-05	0.00201943	23.8491	40.9189	22.5143
rs116381951	T	C	T	C	0.2794	0.0612	0.9817	0.9896	Prostate cancer	1	177439129	0.0471	0.1945	GCST90274811	1	177439129	0.063	9.21e-06	Interleukin-2 receptor subunit beta levels	0.00196672	1.2e-05	7.86e-05	0.00280487	28.0741	40.9189	19.6685
rs117538197	T	C	T	C	0.1213	-0.0264	0.0695	0.0583	Prostate cancer	17	4507431	0.0203	0.1939	GCST90274811	17	4507431	0.0261	3.36e-06	Interleukin-2 receptor subunit beta levels	0.00183145	1.21e-05	4.12e-05	0.00190306	22.4456	40.9189	21.5993
rs117953283	T	G	T	G	0.1688	0.0194	0.0635	0.0447	Prostate cancer	17	74316443	0.0241	0.4222	GCST90274811	17	74316443	0.0374	6.38e-06	Interleukin-2 receptor subunit beta levels	0.00242063	4.62e-06	2.78e-05	0.00338888	28.5464	40.9189	20.3705
rs13001788	T	C	T	C	0.2769	0.0385	0.9745	0.9738	Prostate cancer	2	31896839	0.0301	0.2009	GCST90274811	2	31896839	0.0557	6.65e-07	Interleukin-2 receptor subunit beta levels	0.00298989	1.17e-05	5.97e-06	0.00381064	31.5236	40.9189	24.7136
rs141460846	T	C	T	C	-0.2471	-0.0359	0.9783	0.9833	Prostate cancer	11	40470032	0.0372	0.3347	GCST90274811	11	40470032	0.0535	3.86e-06	Interleukin-2 receptor subunit beta levels	0.00188393	6.64e-06	2.94e-05	0.00259243	29.3758	40.9189	21.3323
rs1472270	C	G	C	G	0.0704	-0.0009	0.346	0.3469	Prostate cancer	7	98121843	0.0085	0.9141	GCST90274811	7	98121843	0.0144	1.01e-06	Interleukin-2 receptor subunit beta levels	0.00210289	7.99e-08	2.99e-06	0.002243	25.4973	40.9189	23.9012
rs147955591	A	C	A	C	-0.0739	-0.0006	0.2186	0.1989	Prostate cancer	8	120536724	0.0103	0.9567	GCST90274811	8	120536724	0.0166	8.52e-06	Interleukin-2 receptor subunit beta levels	0.00174431	2.42e-08	2e-05	0.0018657	21.2004	40.9189	19.8186
rs17549820	T	C	T	C	0.0631	0.0053	0.5622	0.57	Prostate cancer	4	108118301	0.0084	0.5281	GCST90274811	4	108118301	0.0129	1e-06	Interleukin-2 receptor subunit beta levels	0.00202545	2.84e-06	6.17e-06	0.00196	23.1518	40.9189	23.9265
rs2157876	T	G	T	G	-0.1133	0.0012	0.0879	0.0855	Prostate cancer	12	111592380	0.0149	0.938	GCST90274811	12	111592380	0.0239	2.13e-06	Interleukin-2 receptor subunit beta levels	0.00197767	4.62e-08	5.73e-06	0.00205836	23.392	40.9189	22.4732
rs2281533	C	G	C	G	-0.1844	-0.0382	0.0481	0.0341	Prostate cancer	20	6103768	0.0258	0.1388	GCST90274811	20	6103768	0.0404	5.01e-06	Interleukin-2 receptor subunit beta levels	0.00176631	1.56e-05	7.17e-05	0.00311378	36.7762	40.9189	20.8333
rs34246740	T	C	T	C	-0.0721	0.0049	0.2619	0.252	Prostate cancer	11	36198233	0.0095	0.6039	GCST90274811	11	36198233	0.0156	3.8e-06	Interleukin-2 receptor subunit beta levels	0.00187981	1.9e-06	1.69e-05	0.00200979	22.841	40.9189	21.361
rs71476282	T	C	T	C	-0.1842	-0.0463	0.0363	0.0338	Prostate cancer	11	115220909	0.0265	0.0803508	GCST90274811	11	115220909	0.0412	7.79e-06	Interleukin-2 receptor subunit beta levels	0.00175926	2.18e-05	0.000132884	0.00237387	26.9886	40.9189	19.9887
rs9321271	A	C	A	C	-0.157	0.0048	0.9549	0.959	Prostate cancer	6	131393771	0.0206	0.8172	GCST90274811	6	131393771	0.0325	1.36e-06	Interleukin-2 receptor subunit beta levels	0.0019776	3.87e-07	4.8e-06	0.00212307	25.0566	40.9189	23.3363
rs9921181	A	G	A	G	-0.0606	-0.0062	0.4465	0.4482	Prostate cancer	16	80775714	0.0083	0.4539	GCST90274811	16	80775714	0.0128	2.2e-06	Interleukin-2 receptor subunit beta levels	0.00189849	3.98e-06	1.44e-05	0.00181516	21.4287	40.9189	22.4143
rs1013434	T	C	T	C	-0.0732	-0.0011	0.2201	0.2393	Prostate cancer	21	40484010	0.0115	0.923	GCST90274812	21	40484010	0.0158	3.61e-06	Interleukin-33 levels	0.00181859	6.52e-08	9.8e-06	0.00183955	21.7117	40.9189	21.4639
rs10415966	A	C	A	C	-0.1184	-0.0035	0.1177	0.1502	Prostate cancer	19	14299739	0.0149	0.8123	GCST90274812	19	14299739	0.0233	3.74e-07	Interleukin-33 levels	0.00250583	3.93e-07	1.29e-06	0.00291156	30.0153	40.9189	25.8221
rs10944013	T	G	T	G	0.174	-0.0017	0.9427	0.9633	Prostate cancer	6	85296041	0.0243	0.9444	GCST90274812	6	85296041	0.0389	7.71e-06	Interleukin-33 levels	0.00215717	3.49e-08	1.61e-05	0.00327082	30.3708	40.9189	20.0078
rs12453636	A	G	A	G	-0.1028	0.0015	0.1006	0.0996	Prostate cancer	17	64288475	0.0136	0.9129	GCST90274812	17	64288475	0.0231	8.58e-06	Interleukin-33 levels	0.00199847	8.67e-08	1.94e-05	0.00191235	18.9494	40.9189	19.8044
rs1273797	A	G	A	G	-0.0652	0.003	0.4698	0.4702	Prostate cancer	2	227438887	0.0082	0.715801	GCST90274812	2	227438887	0.0144	5.96e-06	Interleukin-33 levels	0.0022114	9.54e-07	1.77e-05	0.00211777	19.6309	40.9189	20.5008
rs13336496	A	C	A	C	0.0936	0.022	0.8755	0.8655	Prostate cancer	16	79491576	0.0128	0.0865008	GCST90274812	16	79491576	0.0203	4.01e-06	Interleukin-33 levels	0.00180179	2.11e-05	7.86e-05	0.00190989	22.5377	40.9189	21.2598
rs1427438	T	C	T	C	0.3362	-0.0535	0.0144	0.0214	Prostate cancer	3	69721499	0.0398	0.1783	GCST90274812	3	69721499	0.0761	9.97e-06	Interleukin-33 levels	0.00178921	1.29e-05	9.88e-05	0.0032084	35.0487	40.9189	19.5176
rs17147023	T	C	T	C	0.0689	0.0065	0.7409	0.7459	Prostate cancer	9	133361010	0.0097	0.5052	GCST90274812	9	133361010	0.0154	7.68e-06	Interleukin-33 levels	0.00176174	3.2e-06	3.81e-05	0.00182262	20.7099	40.9189	20.0169
rs17149396	C	G	C	G	0.1833	-0.0036	0.0307	0.0235	Prostate cancer	7	24423445	0.0285	0.9007	GCST90274812	7	24423445	0.04	4.59e-06	Interleukin-33 levels	0.0017784	1.14e-07	1.27e-05	0.00199964	23.617	40.9189	20.9993
rs28658099	A	T	A	T	0.0848	-0.0255	0.8568	0.8505	Prostate cancer	4	45839898	0.0116	0.0273099	GCST90274812	4	45839898	0.0188	6.46e-06	Interleukin-33 levels	0.00172549	3.45e-05	0.00019969	0.00176459	20.8077	40.9189	20.3459
rs6099755	A	G	A	G	0.095	-0.0003	0.1263	0.1062	Prostate cancer	20	56364589	0.0152	0.9822	GCST90274812	20	56364589	0.0212	7.42e-06	Interleukin-33 levels	0.00176717	2.78e-09	1.68e-05	0.00199179	22.6379	40.9189	20.0805
rs62556318	C	G	C	G	0.1308	-0.0079	0.9172	0.9186	Prostate cancer	9	21663051	0.0154	0.6101	GCST90274812	9	21663051	0.0277	2.34e-06	Interleukin-33 levels	0.00196189	1.88e-06	1.08e-05	0.0025986	29.5527	40.9189	22.2975
rs66755903	A	G	A	G	-0.0752	-0.0041	0.2321	0.2303	Prostate cancer	8	87995921	0.0099	0.682299	GCST90274812	8	87995921	0.0162	3.45e-06	Interleukin-33 levels	0.00189607	1.22e-06	1.36e-05	0.00201579	22.9113	40.9189	21.5479
rs75671803	A	G	A	G	0.2055	0.0156	0.9763	0.9791	Prostate cancer	7	83421169	0.03	0.6029	GCST90274812	7	83421169	0.0451	5.2e-06	Interleukin-33 levels	0.00175894	1.93e-06	2.33e-05	0.00195427	23.0723	40.9189	20.7621
rs77248338	T	G	T	G	0.2314	-0.0152	0.9759	0.977	Prostate cancer	15	98506292	0.0311	0.6252	GCST90274812	15	98506292	0.0518	7.93e-06	Interleukin-33 levels	0.00190255	1.7e-06	2.93e-05	0.00251871	26.435	40.9189	19.9557
rs7742625	C	G	C	G	0.0691	-0.0214	0.6997	0.7189	Prostate cancer	6	38719850	0.0096	0.0258202	GCST90274812	6	38719850	0.0148	3.03e-06	Interleukin-33 levels	0.0019181	3.54e-05	0.000104676	0.00200657	22.8062	40.9189	21.7988
rs78455659	A	G	A	G	0.1259	0.0204	0.9273	0.9151	Prostate cancer	12	96439814	0.017	0.2309	GCST90274812	12	96439814	0.0273	3.99e-06	Interleukin-33 levels	0.00187148	1.03e-05	4.03e-05	0.00213716	24.2937	40.9189	21.268
rs79417946	T	C	T	C	-0.1259	0.0124	0.0665	0.0588	Prostate cancer	9	31779365	0.0193	0.5201	GCST90274812	9	31779365	0.0285	9.98e-06	Interleukin-33 levels	0.00171746	2.94e-06	4.66e-05	0.00196796	22.3666	40.9189	19.5147
rs8042883	T	C	T	C	-0.0681	0.0055	0.5496	0.5443	Prostate cancer	15	66970271	0.0086	0.5269	GCST90274812	15	66970271	0.0135	4.55e-07	Interleukin-33 levels	0.00223834	2.92e-06	2.94e-06	0.00229599	26.1033	40.9189	25.4464
rs10152568	T	C	T	C	-0.0682	-0.0043	0.6072	0.6229	Prostate cancer	15	39160069	0.0107	0.6862	GCST90274813	15	39160069	0.0154	9.49e-06	Interleukin-4 levels	0.00166183	1.15e-06	3.47e-05	0.00221872	26.1991	40.9189	19.6122
rs116963481	A	G	A	G	0.2805	0.0348	0.9846	0.9842	Prostate cancer	10	34284406	0.0374	0.3531	GCST90274813	10	34284406	0.0592	2.16e-06	Interleukin-4 levels	0.0019004	6.17e-06	1.79e-05	0.00238603	28.201	40.9189	22.4503
rs11989681	A	G	A	G	0.0678	-0.0142	0.5982	0.6046	Prostate cancer	8	22649912	0.0087	0.1016	GCST90274813	8	22649912	0.0136	6.19e-07	Interleukin-4 levels	0.00218627	1.9e-05	1.38e-05	0.00220976	25.1209	40.9189	24.8532
rs12481726	T	C	T	C	-0.313	0.0127	0.0162	0.0147	Prostate cancer	20	51651490	0.0422	0.7634	GCST90274813	20	51651490	0.0706	9.27e-06	Interleukin-4 levels	0.00199209	6.46e-07	2.59e-05	0.00312277	30.8463	40.9189	19.6553
rs12641440	C	G	C	G	-0.1181	-0.0149	0.9065	0.9235	Prostate cancer	4	185529634	0.0157	0.3444	GCST90274813	4	185529634	0.025	2.31e-06	Interleukin-4 levels	0.00196353	6.42e-06	1.85e-05	0.00236434	26.8822	40.9189	22.3162
rs12900168	A	G	A	G	0.0716	0.0144	0.4842	0.446	Prostate cancer	15	79066932	0.0091	0.1147	GCST90274813	15	79066932	0.0152	2.47e-06	Interleukin-4 levels	0.00211502	1.79e-05	3.7e-05	0.00256072	26.877	40.9189	22.1891
rs13418255	A	G	A	G	0.0701	-0.0022	0.7233	0.7381	Prostate cancer	2	107668175	0.0092	0.8089	GCST90274813	2	107668175	0.0153	4.61e-06	Interleukin-4 levels	0.00184724	4.08e-07	1.42e-05	0.00196695	22.3551	40.9189	20.992
rs1490743	T	G	T	G	-0.1338	0.0048	0.0752	0.0693	Prostate cancer	9	117036047	0.0173	0.7822	GCST90274813	9	117036047	0.0278	1.49e-06	Interleukin-4 levels	0.00224851	5.49e-07	4.85e-06	0.00249005	25.6591	40.9189	23.1645
rs2502347	T	C	T	C	-0.077	-0.0044	0.2195	0.2231	Prostate cancer	1	243071390	0.0107	0.680299	GCST90274813	1	243071390	0.0167	4.01e-06	Interleukin-4 levels	0.00187071	1.21e-06	1.55e-05	0.00203151	23.0903	40.9189	21.2593
rs2766594	A	G	A	G	0.085	-0.0062	0.5892	0.5854	Prostate cancer	6	35764540	0.0093	0.5031	GCST90274813	6	35764540	0.0179	2.05e-06	Interleukin-4 levels	0.00283156	3.17e-06	8.09e-06	0.00349753	27.8713	40.9189	22.5492
rs371539	T	G	T	G	0.0797	0.025	0.8324	0.8286	Prostate cancer	11	131406108	0.0119	0.0351002	GCST90274813	11	131406108	0.0177	6.71e-06	Interleukin-4 levels	0.00171924	3.15e-05	0.000184792	0.00177236	20.9031	40.9189	20.2754
rs4876407	T	G	T	G	-0.1391	-0.0336	0.9451	0.9571	Prostate cancer	8	119274249	0.023	0.1433	GCST90274813	8	119274249	0.0299	3.28e-06	Interleukin-4 levels	0.00183294	1.52e-05	4.91e-05	0.00200786	23.7123	40.9189	21.6427
rs542596614	A	G	A	G	0.2505	-0.0189	0.9688	0.9664	Prostate cancer	2	126802132	0.028	0.5	GCST90274813	2	126802132	0.0566	9.61e-06	Interleukin-4 levels	0.00246058	3.25e-06	3.36e-05	0.00379345	30.2385	40.9189	19.5877
rs61984458	T	C	T	C	-0.1955	-0.0382	0.0285	0.0196	Prostate cancer	14	64861479	0.0344	0.2671	GCST90274813	14	64861479	0.043	5.45e-06	Interleukin-4 levels	0.00181902	8.79e-06	4.74e-05	0.00211647	24.058	40.9189	20.6708
rs669029	A	G	A	G	-0.0699	-0.0138	0.7524	0.7513	Prostate cancer	18	10579314	0.0096	0.1509	GCST90274813	18	10579314	0.0158	9.69e-06	Interleukin-4 levels	0.00172252	1.47e-05	0.000113051	0.00182047	20.6873	40.9189	19.5722
rs75610895	T	C	T	C	-0.2354	-0.0427	0.0253	0.0202	Prostate cancer	10	6800809	0.0309	0.167	GCST90274813	10	6800809	0.045	1.68e-07	Interleukin-4 levels	0.0023166	1.36e-05	3.53e-06	0.00273297	32.2963	40.9189	27.3645
rs7587695	A	C	A	C	0.0598	0.001	0.6086	0.6022	Prostate cancer	2	172513639	0.0082	0.9063	GCST90274813	2	172513639	0.0134	8.09e-06	Interleukin-4 levels	0.0016862	1.06e-07	2.13e-05	0.00170367	20.1222	40.9189	19.9156
rs76678067	T	G	T	G	0.1045	-0.0109	0.9046	0.9047	Prostate cancer	15	79597917	0.0141	0.4396	GCST90274813	15	79597917	0.0231	6.07e-06	Interleukin-4 levels	0.00180093	4.26e-06	3.5e-05	0.00188481	21.4198	40.9189	20.4649
rs79359966	A	C	A	C	-0.1552	0.0313	0.9596	0.9588	Prostate cancer	8	71370392	0.0216	0.1463	GCST90274813	8	71370392	0.0345	6.84e-06	Interleukin-4 levels	0.00171598	1.5e-05	9e-05	0.00186761	22.0285	40.9189	20.237
rs802281	T	G	T	G	-0.1305	-0.0494	0.9368	0.9547	Prostate cancer	6	124516990	0.0233	0.0341704	GCST90274813	6	124516990	0.0294	9.05e-06	Interleukin-4 levels	0.0016692	3.2e-05	0.000240946	0.00201658	23.8114	40.9189	19.7027
rs9270229	T	C	T	C	0.1212	0.0256	0.1501	0.142	Prostate cancer	6	32556783	0.0116	0.0265797	GCST90274813	6	32556783	0.0255	2e-06	Interleukin-4 levels	0.00360145	3.47e-05	2.77e-05	0.00374786	23.5123	40.9189	22.5904
rs9425728	T	G	T	G	0.0664	0.0019	0.2727	0.2733	Prostate cancer	1	173492229	0.0091	0.8378	GCST90274813	1	173492229	0.015	9.57e-06	Interleukin-4 levels	0.00172455	3.11e-07	2.68e-05	0.0017489	19.8725	40.9189	19.5954
rs10182644	T	C	T	C	-0.0828	-0.015	0.1671	0.1491	Prostate cancer	2	46461654	0.0134	0.261	GCST90274814	2	46461654	0.0186	8.52e-06	Interleukin-5 levels	0.00174416	8.93e-06	7.06e-05	0.00190836	21.686	40.9189	19.8169
rs10988407	A	G	A	G	0.0777	0.0073	0.2002	0.1786	Prostate cancer	9	132281601	0.0116	0.527	GCST90274814	9	132281601	0.0167	3.28e-06	Interleukin-5 levels	0.00183289	2.82e-06	1.77e-05	0.00193338	22.8368	40.9189	21.6476
rs112289272	T	C	T	C	-0.213	0.0162	0.9743	0.9794	Prostate cancer	3	126910721	0.0311	0.6026	GCST90274814	3	126910721	0.0471	6.12e-06	Interleukin-5 levels	0.00187222	1.93e-06	2.5e-05	0.00227203	24.8284	40.9189	20.4511
rs114829303	T	C	T	C	0.1661	-0.0229	0.0436	0.0504	Prostate cancer	1	37473314	0.022	0.2984	GCST90274814	1	37473314	0.0361	4.2e-06	Interleukin-5 levels	0.00186305	7.73e-06	3.48e-05	0.00230089	26.1568	40.9189	21.1702
rs12592185	T	C	T	C	0.0838	0.016	0.8068	0.8119	Prostate cancer	15	70546132	0.0109	0.1397	GCST90274814	15	70546132	0.0173	1.27e-06	Interleukin-5 levels	0.00206447	1.54e-05	2.08e-05	0.00218923	24.8847	40.9189	23.4637
rs139303816	A	G	A	G	0.1942	-0.0272	0.0315	0.0336	Prostate cancer	1	62157502	0.0261	0.2959	GCST90274814	1	62157502	0.0435	8.03e-06	Interleukin-5 levels	0.00201056	7.74e-06	5.22e-05	0.00230112	22.8175	40.9189	19.9306
rs141941146	A	G	A	G	0.3833	-0.0517	0.9859	0.979	Prostate cancer	6	124474284	0.0403	0.199	GCST90274814	6	124474284	0.0825	3.38e-06	Interleukin-5 levels	0.0020958	1.17e-05	3.36e-05	0.0040847	42.1547	40.9189	21.5859
rs144124166	T	G	T	G	0.211	0.0215	0.0271	0.0244	Prostate cancer	15	56343222	0.0297	0.4684	GCST90274814	15	56343222	0.0465	5.69e-06	Interleukin-5 levels	0.00174691	3.74e-06	3.24e-05	0.00234765	27.6874	40.9189	20.5901
rs17009223	A	G	A	G	-0.1169	-0.0164	0.0881	0.0868	Prostate cancer	1	208050360	0.0148	0.2668	GCST90274814	1	208050360	0.0236	7.29e-07	Interleukin-5 levels	0.0020773	8.75e-06	8.7e-06	0.00219575	25.9382	40.9189	24.5361
rs2212484	T	G	T	G	-0.0732	-0.0035	0.2044	0.2076	Prostate cancer	11	132275295	0.01	0.7284	GCST90274814	11	132275295	0.0162	6.23e-06	Interleukin-5 levels	0.00172873	8.73e-07	2.23e-05	0.00174272	20.5825	40.9189	20.417
rs2995998	T	C	T	C	-0.0623	0.0087	0.3561	0.3592	Prostate cancer	9	96094846	0.0084	0.3016	GCST90274814	9	96094846	0.0137	5.43e-06	Interleukin-5 levels	0.00175089	7.65e-06	4.55e-05	0.0017799	21.0225	40.9189	20.6793
rs34639000	A	G	A	G	0.0765	0.0183	0.7289	0.7339	Prostate cancer	5	95530542	0.0091	0.0438702	GCST90274814	5	95530542	0.0147	1.95e-07	Interleukin-5 levels	0.0022955	2.88e-05	9.13e-06	0.00231286	27.2879	40.9189	27.0825
rs41264833	A	G	A	G	-0.2117	0.0139	0.0254	0.023	Prostate cancer	1	159897328	0.031	0.6538	GCST90274814	1	159897328	0.0468	6.08e-06	Interleukin-5 levels	0.00173283	1.43e-06	2.46e-05	0.00221887	26.2142	40.9189	20.4621
rs4277106	A	G	A	G	-0.2747	-0.0155	0.9858	0.9847	Prostate cancer	11	10380223	0.0362	0.6688	GCST90274814	11	10380223	0.0592	3.48e-06	Interleukin-5 levels	0.00182323	1.31e-06	1.45e-05	0.00211263	24.9565	40.9189	21.5315
rs4815018	A	G	A	G	0.0615	0.0066	0.363	0.3592	Prostate cancer	20	2159791	0.0085	0.4361	GCST90274814	20	2159791	0.0139	9.67e-06	Interleukin-5 levels	0.00172299	4.3e-06	5.3e-05	0.00174915	19.8736	40.9189	19.5759
rs62069649	A	G	A	G	0.2206	0.0355	0.0267	0.017	Prostate cancer	17	59402478	0.0426	0.4048	GCST90274814	17	59402478	0.0482	4.72e-06	Interleukin-5 levels	0.00200448	4.95e-06	2.73e-05	0.00252929	26.4449	40.9189	20.9468
rs67927317	T	C	T	C	-0.114	-0.0014	0.0784	0.0905	Prostate cancer	16	6155800	0.0167	0.9334	GCST90274814	16	6155800	0.0255	7.8e-06	Interleukin-5 levels	0.00175904	5.01e-08	1.91e-05	0.00187801	21.3405	40.9189	19.9862
rs706716	T	C	T	C	-0.0708	-0.0056	0.2459	0.246	Prostate cancer	5	67548442	0.0093	0.549	GCST90274814	5	67548442	0.0158	7.43e-06	Interleukin-5 levels	0.00176724	2.59e-06	3.41e-05	0.00185902	21.1243	40.9189	20.0795
rs7142197	A	G	A	G	-0.0924	-0.0002	0.1442	0.1448	Prostate cancer	14	93316119	0.0115	0.9891	GCST90274814	14	93316119	0.0188	8.88e-07	Interleukin-5 levels	0.00204798	2.16e-09	2.43e-06	0.00210723	24.8566	40.9189	24.1562
rs72873944	T	C	T	C	-0.1649	0.0367	0.9609	0.9687	Prostate cancer	2	139572732	0.0267	0.1689	GCST90274814	2	139572732	0.0368	7.43e-06	Interleukin-5 levels	0.00170017	1.35e-05	8.87e-05	0.00204327	24.1395	40.9189	20.0792
rs9457226	A	G	A	G	0.1911	-0.0321	0.0282	0.0353	Prostate cancer	6	167250912	0.0262	0.2215	GCST90274814	6	167250912	0.0429	8.41e-06	Interleukin-5 levels	0.00168106	1.07e-05	8.29e-05	0.0020016	23.6342	40.9189	19.843
rs10234370	T	C	T	C	0.0582	0.0046	0.6371	0.6451	Prostate cancer	7	28486167	0.0087	0.5983	GCST90274815	7	28486167	0.0127	4.59e-06	Interleukin-6 levels	0.00146716	1.99e-06	2.63e-05	0.00156628	22.422	40.9189	21.0009
rs10977774	A	C	A	C	-0.3418	0.025	0.9865	0.9897	Prostate cancer	9	954741	0.0502	0.6178	GCST90274815	9	954741	0.0701	1.08e-06	Interleukin-6 levels	0.00192758	1.77e-06	5.85e-06	0.00311175	38.4252	40.9189	23.7743
rs112669397	T	C	T	C	-0.3592	0.0139	0.0119	0.0145	Prostate cancer	4	7449788	0.0519	0.7887	GCST90274815	4	7449788	0.0787	5.01e-06	Interleukin-6 levels	0.00203517	5.11e-07	1.46e-05	0.00303424	31.0891	40.9189	20.8316
rs12433894	C	G	C	G	0.063	0.0073	0.2257	0.2067	Prostate cancer	14	85619189	0.0104	0.4811	GCST90274815	14	85619189	0.0139	5.83e-06	Interleukin-6 levels	0.00139322	3.51e-06	4.24e-05	0.00138724	20.4541	40.9189	20.5424
rs1346147	A	G	A	G	-0.0659	0.0199	0.7459	0.7471	Prostate cancer	8	21260780	0.0093	0.0319602	GCST90274815	8	21260780	0.0135	1.05e-06	Interleukin-6 levels	0.00166439	3.26e-05	6.38e-05	0.00164621	23.5681	40.9189	23.8289
rs185969953	T	G	T	G	-0.3427	-0.1307	0.0105	0.0091	Prostate cancer	13	68942611	0.0536	0.01477	GCST90274815	13	68942611	0.0682	5.04e-07	Interleukin-6 levels	0.00194871	4.24e-05	4.17e-05	0.00244041	31.6366	40.9189	25.2499
rs187416244	T	C	T	C	-0.2244	-0.071	0.0182	0.0199	Prostate cancer	7	76792340	0.0344	0.0390598	GCST90274815	7	76792340	0.0469	1.71e-06	Interleukin-6 levels	0.00155239	3.04e-05	9.07e-05	0.00179958	26.5447	40.9189	22.8929
rs2228145	A	C	A	C	-0.1684	-0.0154	0.6128	0.6101	Prostate cancer	1	154426970	0.0084	0.06624	GCST90274815	1	154426970	0.0119	1.83e-45	Interleukin-6 levels	0.0134039	2.4e-05	7.04e-38	0.0134576	201.071	40.9189	200.258
rs248536	T	G	T	G	-0.0671	0.0221	0.2276	0.2202	Prostate cancer	5	141146747	0.0101	0.0279203	GCST90274815	5	141146747	0.0143	2.7e-06	Interleukin-6 levels	0.00153809	3.41e-05	0.000142745	0.00158303	22.6621	40.9189	22.0178
rs35441559	A	C	A	C	-0.2484	-0.0026	0.9868	0.9852	Prostate cancer	18	73432128	0.0381	0.9454	GCST90274815	18	73432128	0.0553	7.06e-06	Interleukin-6 levels	0.00136716	3.32e-08	2.13e-05	0.00160745	23.7287	40.9189	20.1768
rs554155854	T	C	T	C	-0.2313	-0.0046	0.9602	0.9696	Prostate cancer	10	79656931	0.0329	0.8883	GCST90274815	10	79656931	0.0484	1.76e-06	Interleukin-6 levels	0.0023184	1.39e-07	4.61e-06	0.00408908	40.3525	40.9189	22.8381
rs76203502	A	G	A	G	-0.2492	-0.0288	0.017	0.0114	Prostate cancer	10	127845552	0.0454	0.5252	GCST90274815	10	127845552	0.0557	7.68e-06	Interleukin-6 levels	0.00158207	2.87e-06	4.1e-05	0.00207553	26.2726	40.9189	20.0164
rs79254378	A	C	A	C	0.1173	-0.018	0.0664	0.0628	Prostate cancer	19	58504085	0.0202	0.372	GCST90274815	19	58504085	0.0262	7.57e-06	Interleukin-6 levels	0.00140043	5.66e-06	6.53e-05	0.0017059	24.4242	40.9189	20.0444
rs10403201	A	G	A	G	-0.0584	-0.0058	0.2923	0.2971	Prostate cancer	19	14764810	0.0094	0.5382	GCST90274816	19	14764810	0.0127	4.26e-06	Interleukin-7 levels	0.00143368	2.71e-06	2.88e-05	0.00141102	20.8109	40.9189	21.1455
rs1050152	T	C	T	C	-0.0651	0.0059	0.4122	0.4107	Prostate cancer	5	131676320	0.008	0.4663	GCST90274816	5	131676320	0.0133	9.84e-07	Interleukin-7 levels	0.00202918	3.88e-06	6.98e-06	0.00205367	24.2481	40.9189	23.9584
rs10734292	A	G	A	G	0.1208	0.0103	0.067	0.0729	Prostate cancer	11	20486401	0.0166	0.5349	GCST90274816	11	20486401	0.0267	6.06e-06	Interleukin-7 levels	0.00173553	2.75e-06	3.03e-05	0.0018244	21.5198	40.9189	20.4697
rs11158239	T	G	T	G	0.0965	0.0209	0.0814	0.081	Prostate cancer	14	59452945	0.0147	0.1548	GCST90274816	14	59452945	0.0217	8.71e-06	Interleukin-7 levels	0.00138237	1.44e-05	0.0001429	0.00139263	19.9228	40.9189	19.7758
rs11171132	T	C	T	C	-0.0724	-0.0124	0.8342	0.8351	Prostate cancer	12	55251385	0.0119	0.2982	GCST90274816	12	55251385	0.0163	8.92e-06	Interleukin-7 levels	0.00137909	7.74e-06	9.1e-05	0.00144998	20.7445	40.9189	19.7289
rs116415547	T	G	T	G	0.2093	0.0507	0.0198	0.017	Prostate cancer	4	110732727	0.0324	0.1174	GCST90274816	4	110732727	0.046	5.36e-06	Interleukin-7 levels	0.0014906	1.75e-05	0.000108896	0.00170039	23.6212	40.9189	20.7025
rs12217463	T	C	T	C	-0.1374	0.0607	0.9572	0.9633	Prostate cancer	10	16318694	0.0235	0.00975304	GCST90274816	10	16318694	0.031	9.33e-06	Interleukin-7 levels	0.00133153	4.76e-05	0.000628806	0.00154686	22.8267	40.9189	19.6449
rs12321566	A	G	A	G	0.0698	-0.0044	0.237	0.2523	Prostate cancer	12	97807415	0.0096	0.6484	GCST90274816	12	97807415	0.0139	5.12e-07	Interleukin-7 levels	0.00176212	1.5e-06	3.43e-06	0.00176203	25.2151	40.9189	25.2163
rs12699881	A	G	A	G	0.068	-0.0029	0.2517	0.2624	Prostate cancer	7	2401569	0.0101	0.776499	GCST90274816	7	2401569	0.0138	8.33e-07	Interleukin-7 levels	0.00169673	5.88e-07	4.12e-06	0.00174183	24.9273	40.9189	24.2806
rs144728120	T	C	T	C	0.1495	0.0375	0.0436	0.0418	Prostate cancer	3	35502404	0.0223	0.0928795	GCST90274816	3	35502404	0.0316	2.23e-06	Interleukin-7 levels	0.00151876	2.02e-05	6.85e-05	0.00186397	27.4795	40.9189	22.3825
rs17161952	T	C	T	C	0.0929	-0.0075	0.9031	0.9053	Prostate cancer	1	223649878	0.0151	0.6176	GCST90274816	1	223649878	0.0204	5.27e-06	Interleukin-7 levels	0.00140572	1.76e-06	2.94e-05	0.0015105	22.2864	40.9189	20.7382
rs570880779	T	C	T	C	-0.2336	-0.0306	0.0215	0.0131	Prostate cancer	15	73960703	0.0358	0.3932	GCST90274816	15	73960703	0.0505	3.73e-06	Interleukin-7 levels	0.00157053	5.21e-06	3.17e-05	0.00229602	31.3046	40.9189	21.3975
rs62338232	A	G	A	G	-0.0813	0.0056	0.1357	0.1402	Prostate cancer	4	185760185	0.0124	0.6486	GCST90274816	4	185760185	0.018	6.28e-06	Interleukin-7 levels	0.00142596	1.45e-06	3.12e-05	0.00155044	22.184	40.9189	20.4003
rs62387962	T	G	T	G	-0.078	-0.0008	0.1347	0.138	Prostate cancer	5	157298830	0.0119	0.9469	GCST90274816	5	157298830	0.0176	9.34e-06	Interleukin-7 levels	0.00137296	3.22e-08	2.66e-05	0.00141825	20.2899	40.9189	19.641
rs7026771	A	G	A	G	0.0691	-0.0106	0.5682	0.5781	Prostate cancer	9	133854336	0.0101	0.2942	GCST90274816	9	133854336	0.0148	3.03e-06	Interleukin-7 levels	0.00175474	7.85e-06	2.98e-05	0.00234299	29.1236	40.9189	21.7988
rs74131483	A	G	A	G	0.1372	0.0143	0.9451	0.9417	Prostate cancer	1	194276216	0.0173	0.409	GCST90274816	1	194276216	0.0274	5.52e-07	Interleukin-7 levels	0.00189044	4.87e-06	5.57e-06	0.00195339	25.9096	40.9189	25.073
rs76213792	T	G	T	G	-0.2791	-0.0143	0.0113	0.0113	Prostate cancer	12	17798114	0.0419	0.7322	GCST90274816	12	17798114	0.0616	5.87e-06	Interleukin-7 levels	0.00143491	8.3e-07	2.54e-05	0.00174058	24.9092	40.9189	20.5285
rs78939185	C	G	C	G	0.2134	0.0345	0.0211	0.0194	Prostate cancer	7	129478199	0.032	0.2814	GCST90274816	7	129478199	0.0481	9.14e-06	Interleukin-7 levels	0.00166911	8.29e-06	7.5e-05	0.00188122	22.1893	40.9189	19.6833
rs79072837	T	C	T	C	-0.136	0.0331	0.0497	0.0518	Prostate cancer	15	81321256	0.0192	0.0835795	GCST90274816	15	81321256	0.028	1.19e-06	Interleukin-7 levels	0.0016009	2.12e-05	4.35e-05	0.00174713	25.7505	40.9189	23.5918
rs11712240	T	C	T	C	0.0932	-0.0087	0.1151	0.1089	Prostate cancer	3	132203683	0.013	0.5008	GCST90274817	3	132203683	0.0206	6.06e-06	Interleukin-8 levels	0.00173533	3.19e-06	3.21e-05	0.00176942	20.8719	40.9189	20.469
rs12075	A	G	A	G	0.0667	0.0063	0.5552	0.5736	Prostate cancer	1	159175354	0.0082	0.4433	GCST90274817	1	159175354	0.0116	8.92e-09	Interleukin-8 levels	0.00223818	4.21e-06	1.69e-07	0.00219733	32.4578	40.9189	33.0625
rs12188297	A	T	A	T	-0.0755	0.0197	0.2006	0.1984	Prostate cancer	5	120608739	0.0102	0.05365	GCST90274817	5	120608739	0.0147	2.81e-07	Interleukin-8 levels	0.00178667	2.66e-05	1.8e-05	0.00182818	26.9931	40.9189	26.3791
rs12217463	T	C	T	C	-0.1365	0.0607	0.9559	0.9633	Prostate cancer	10	16318694	0.0235	0.00975304	GCST90274817	10	16318694	0.0308	9.34e-06	Interleukin-8 levels	0.00133054	4.76e-05	0.000630477	0.00157089	23.1945	40.9189	19.641
rs13064825	T	C	T	C	0.056	0.003	0.4104	0.4001	Prostate cancer	3	16705058	0.0084	0.718701	GCST90274817	3	16705058	0.012	3.06e-06	Interleukin-8 levels	0.00152124	9.09e-07	1.45e-05	0.00151765	21.7262	40.9189	21.7778
rs141384565	A	G	A	G	-0.3943	-0.0599	0.0095	0.0081	Prostate cancer	6	2140801	0.057	0.2935	GCST90274817	6	2140801	0.0886	8.57e-06	Interleukin-8 levels	0.00174516	7.87e-06	6.55e-05	0.00292591	33.245	40.9189	19.8055
rs141979722	T	C	T	C	0.2829	0.011	0.0146	0.0109	Prostate cancer	3	172877373	0.0423	0.7946	GCST90274817	3	172877373	0.0608	3.27e-06	Interleukin-8 levels	0.00185223	4.82e-07	1.1e-05	0.00230283	26.9291	40.9189	21.65
rs144815207	T	C	T	C	0.3186	-0.0396	0.9879	0.9855	Prostate cancer	1	233542010	0.037	0.284	GCST90274817	1	233542010	0.0622	3.02e-07	Interleukin-8 levels	0.00195531	8.17e-06	4.74e-06	0.00242672	32.5777	40.9189	26.2368
rs145125644	A	G	A	G	0.2687	-0.051	0.9866	0.9821	Prostate cancer	7	17688229	0.0341	0.1346	GCST90274817	7	17688229	0.0555	1.29e-06	Interleukin-8 levels	0.00158864	1.59e-05	3.43e-05	0.00190902	28.1756	40.9189	23.4396
rs1516478	T	C	T	C	0.1479	-0.0018	0.0386	0.0287	Prostate cancer	3	76218188	0.0239	0.9409	GCST90274817	3	76218188	0.0322	4.37e-06	Interleukin-8 levels	0.00142934	4.04e-08	1.39e-05	0.00162352	23.968	40.9189	21.0972
rs1582581	A	G	A	G	-0.0541	0.0017	0.393	0.387	Prostate cancer	16	60551242	0.0084	0.8361	GCST90274817	16	60551242	0.0119	5.46e-06	Interleukin-8 levels	0.00140135	2.92e-07	2.03e-05	0.00139639	20.5947	40.9189	20.6681
rs1988503	T	C	T	C	0.0548	0.004	0.5814	0.5852	Prostate cancer	17	11189278	0.0092	0.6615	GCST90274817	17	11189278	0.0121	5.93e-06	Interleukin-8 levels	0.00143289	1.35e-06	2.9e-05	0.00146172	20.9245	40.9189	20.5112
rs2466352	C	G	C	G	-0.0957	-0.0055	0.9125	0.931	Prostate cancer	8	133415401	0.0167	0.742099	GCST90274817	8	133415401	0.0212	6.36e-06	Interleukin-8 levels	0.00138168	7.73e-07	2.77e-05	0.0014625	21.5712	40.9189	20.3776
rs34519991	T	C	T	C	0.0555	0.0123	0.5073	0.5011	Prostate cancer	18	12258051	0.0084	0.1455	GCST90274817	18	12258051	0.012	3.75e-06	Interleukin-8 levels	0.00149424	1.53e-05	7.51e-05	0.0015398	22.0438	40.9189	21.3906
rs370192906	A	G	A	G	0.389	0.0187	0.9886	0.9899	Prostate cancer	16	22653353	0.0519	0.718899	GCST90274817	16	22653353	0.0875	8.76e-06	Interleukin-8 levels	0.00199423	9.26e-07	2.64e-05	0.00341079	33.8516	40.9189	19.7644
rs4769882	T	C	T	C	-0.1103	0.0216	0.94	0.9308	Prostate cancer	13	31352538	0.0175	0.2179	GCST90274817	13	31352538	0.0249	9.44e-06	Interleukin-8 levels	0.00132928	1.09e-05	0.000127063	0.00137233	20.2588	40.9189	19.6224
rs6446951	A	G	A	G	-0.1894	0.0356	0.0665	0.0593	Prostate cancer	4	74574265	0.0174	0.0410998	GCST90274817	4	74574265	0.0241	3.87e-15	Interleukin-8 levels	0.00417632	2.98e-05	7.91e-12	0.00445375	65.8838	40.9189	61.7626
rs6585420	T	C	T	C	0.1545	0.0294	0.9598	0.9672	Prostate cancer	10	118629449	0.025	0.2397	GCST90274817	10	118629449	0.0325	2e-06	Interleukin-8 levels	0.00153062	9.86e-06	3.21e-05	0.00184202	27.2051	40.9189	22.5991
rs6709159	A	G	A	G	0.0562	0.006	0.4424	0.4466	Prostate cancer	2	108946178	0.0083	0.4674	GCST90274817	2	108946178	0.0117	1.56e-06	Interleukin-8 levels	0.00156266	3.73e-06	1.39e-05	0.00155826	23.0078	40.9189	23.0728
rs71337505	A	G	A	G	0.0948	-0.0056	0.1019	0.0993	Prostate cancer	19	34248514	0.0152	0.7154	GCST90274817	19	34248514	0.0209	5.74e-06	Interleukin-8 levels	0.00141098	9.68e-07	2.63e-05	0.00164492	23.9912	40.9189	20.5743
rs72633250	A	C	A	C	0.0574	-0.0036	0.4025	0.4101	Prostate cancer	15	101649801	0.0088	0.686	GCST90274817	15	101649801	0.0124	3.67e-06	Interleukin-8 levels	0.00149684	1.19e-06	1.83e-05	0.00158474	22.6882	40.9189	21.4279
rs72710634	T	C	T	C	0.1432	-0.0105	0.0447	0.038	Prostate cancer	5	2106405	0.0239	0.6591	GCST90274817	5	2106405	0.0322	8.7e-06	Interleukin-8 levels	0.00133979	1.38e-06	4.24e-05	0.00175131	25.8631	40.9189	19.7776
rs72886502	T	G	T	G	-0.3895	-0.0279	0.0095	0.0069	Prostate cancer	18	36692976	0.0544	0.6083	GCST90274817	18	36692976	0.076	2.98e-07	Interleukin-8 levels	0.00213277	1.88e-06	1.87e-06	0.00285511	35.1869	40.9189	26.2656
rs7458637	A	G	A	G	0.0948	-0.0095	0.7166	0.6929	Prostate cancer	7	57105100	0.0128	0.4569	GCST90274817	7	57105100	0.0213	8.56e-06	Interleukin-8 levels	0.00201149	3.93e-06	3.94e-05	0.00365026	36.0061	40.9189	19.8088
rs75579654	A	G	A	G	0.1025	0.0308	0.0739	0.0684	Prostate cancer	1	46373240	0.0158	0.0512602	GCST90274817	1	46373240	0.0231	9.11e-06	Interleukin-8 levels	0.00133524	2.71e-05	0.000295506	0.00143807	21.2075	40.9189	19.689
rs76149515	T	C	T	C	-0.1546	0.024	0.9689	0.9707	Prostate cancer	16	4804879	0.0245	0.3284	GCST90274817	16	4804879	0.0348	8.89e-06	Interleukin-8 levels	0.00133725	6.84e-06	8.75e-05	0.00144042	21.2609	40.9189	19.7361
rs8069322	A	G	A	G	0.0668	-0.0019	0.7222	0.7253	Prostate cancer	17	54450134	0.0092	0.8346	GCST90274817	17	54450134	0.0131	3.41e-07	Interleukin-8 levels	0.00176286	3.04e-07	1.7e-06	0.00179049	26.4105	40.9189	26.0022
rs906401	T	C	T	C	0.0941	-0.0046	0.9034	0.9071	Prostate cancer	18	73700336	0.0141	0.745399	GCST90274817	18	73700336	0.02	2.54e-06	Interleukin-8 levels	0.0015009	7.59e-07	1.22e-05	0.00154549	22.7957	40.9189	22.137
rs972492	A	C	A	C	-0.0936	-0.027	0.1404	0.1349	Prostate cancer	5	37903927	0.0135	0.0448797	GCST90274817	5	37903927	0.0184	3.64e-07	Interleukin-8 levels	0.00208085	2.85e-05	1.68e-05	0.00211468	26.2988	40.9189	25.8771
rs10403201	A	G	A	G	-0.0597	-0.0058	0.292	0.2971	Prostate cancer	19	14764810	0.0094	0.5382	GCST90274818	19	14764810	0.0125	1.79e-06	Latency-associated peptide transforming growth factor beta 1 levels	0.00154637	2.71e-06	1.35e-05	0.00147365	21.736	40.9189	22.8102
rs10508556	T	C	T	C	0.0523	0.0061	0.4627	0.4565	Prostate cancer	10	18285342	0.0081	0.4519	GCST90274818	10	18285342	0.0114	4.48e-06	Latency-associated peptide transforming growth factor beta 1 levels	0.00142654	4.04e-06	3.61e-05	0.00136003	20.0647	40.9189	21.0472
rs114152855	T	C	T	C	-0.299	-0.0619	0.0112	0.0104	Prostate cancer	4	175537640	0.0443	0.1625	GCST90274818	4	175537640	0.0613	1.07e-06	Latency-associated peptide transforming growth factor beta 1 levels	0.00166715	1.39e-05	2.43e-05	0.00198015	28.2672	40.9189	23.7915
rs143420877	T	C	T	C	0.1447	-0.0114	0.0388	0.038	Prostate cancer	8	51696312	0.0219	0.6033	GCST90274818	8	51696312	0.0303	1.79e-06	Latency-associated peptide transforming growth factor beta 1 levels	0.0015462	1.93e-06	1.18e-05	0.00156175	23.0359	40.9189	22.8061
rs144834546	T	C	T	C	-0.2662	-0.0497	0.0227	0.0125	Prostate cancer	12	24809427	0.046	0.2799	GCST90274818	12	24809427	0.0526	4.17e-07	Latency-associated peptide transforming growth factor beta 1 levels	0.00197645	8.32e-06	5.99e-06	0.00314412	40.7912	40.9189	25.6121
rs149458216	A	C	A	C	-0.2301	-0.0183	0.0182	0.0203	Prostate cancer	16	48902293	0.0329	0.577801	GCST90274818	16	48902293	0.0472	1.09e-06	Latency-associated peptide transforming growth factor beta 1 levels	0.00161147	2.21e-06	8.01e-06	0.00189216	27.913	40.9189	23.7656
rs1800472	A	G	A	G	-0.4623	0.0042	0.0345	0.0264	Prostate cancer	19	41847860	0.0274	0.8778	GCST90274818	19	41847860	0.0335	2.55e-43	Latency-associated peptide transforming growth factor beta 1 levels	0.0127603	1.68e-07	6.2e-39	0.014238	212.813	40.9189	190.44
rs183319799	T	G	T	G	0.2185	0.0166	0.0182	0.0168	Prostate cancer	9	87111083	0.0344	0.629001	GCST90274818	9	87111083	0.0461	2.14e-06	Latency-associated peptide transforming growth factor beta 1 levels	0.00152267	1.66e-06	1.31e-05	0.00170619	25.1768	40.9189	22.4647
rs1921885	A	C	A	C	0.1265	0.0321	0.9391	0.9429	Prostate cancer	4	84952443	0.0195	0.1001	GCST90274818	4	84952443	0.0263	1.51e-06	Latency-associated peptide transforming growth factor beta 1 levels	0.0016168	1.93e-05	4.5e-05	0.00183037	26.1967	40.9189	23.135
rs2365502	A	G	A	G	0.1321	0.0108	0.9369	0.9422	Prostate cancer	7	156395495	0.0182	0.552	GCST90274818	7	156395495	0.029	5.23e-06	Latency-associated peptide transforming growth factor beta 1 levels	0.00175907	2.51e-06	2.57e-05	0.00206328	24.3454	40.9189	20.7496
rs2525703	T	C	T	C	0.0668	-0.006	0.1815	0.1753	Prostate cancer	7	144100595	0.0106	0.5724	GCST90274818	7	144100595	0.0151	9.7e-06	Latency-associated peptide transforming growth factor beta 1 levels	0.00132765	2.28e-06	5.51e-05	0.0013258	19.543	40.9189	19.5704
rs34536806	T	G	T	G	0.0989	-0.0071	0.9023	0.909	Prostate cancer	11	95274487	0.0153	0.644401	GCST90274818	11	95274487	0.021	2.48e-06	Latency-associated peptide transforming growth factor beta 1 levels	0.00155014	1.54e-06	1.4e-05	0.00172452	24.679	40.9189	22.1796
rs34992551	T	C	T	C	-0.0931	0.0138	0.1103	0.115	Prostate cancer	7	16406570	0.0144	0.3361	GCST90274818	7	16406570	0.0199	2.89e-06	Latency-associated peptide transforming growth factor beta 1 levels	0.0014835	6.55e-06	3.27e-05	0.00170117	25.1044	40.9189	21.8874
rs371119188	T	C	T	C	0.1588	0.0167	0.0406	0.0361	Prostate cancer	13	112876202	0.0236	0.4801	GCST90274818	13	112876202	0.0358	9.18e-06	Latency-associated peptide transforming growth factor beta 1 levels	0.0016119	3.57e-06	5.05e-05	0.00196452	23.9887	40.9189	19.6759
rs4659810	A	G	A	G	-0.0551	0.0208	0.3438	0.3595	Prostate cancer	1	237983229	0.0089	0.0193001	GCST90274818	1	237983229	0.0121	5.27e-06	Latency-associated peptide transforming growth factor beta 1 levels	0.00140788	3.89e-05	0.000304917	0.00136986	20.1755	40.9189	20.7364
rs4911055	T	C	T	C	-0.0607	0.0141	0.6556	0.6544	Prostate cancer	13	85826913	0.0083	0.0904795	GCST90274818	13	85826913	0.0137	9.39e-06	Latency-associated peptide transforming growth factor beta 1 levels	0.00166353	2.06e-05	0.000156006	0.00166383	19.6343	40.9189	19.6307
rs4919925	T	C	T	C	0.0561	0.0017	0.3696	0.3571	Prostate cancer	21	43119625	0.0094	0.8563	GCST90274818	21	43119625	0.0124	6.06e-06	Latency-associated peptide transforming growth factor beta 1 levels	0.0014308	2.33e-07	2.1e-05	0.00146657	20.9808	40.9189	20.4683
rs56025355	T	C	T	C	0.3006	0.0022	0.0106	0.0129	Prostate cancer	17	62499163	0.0454	0.9622	GCST90274818	17	62499163	0.0666	6.38e-06	Latency-associated peptide transforming growth factor beta 1 levels	0.00156871	1.67e-08	1.69e-05	0.00189533	24.6216	40.9189	20.3718
rs58801460	A	G	A	G	0.0964	0.0368	0.081	0.0647	Prostate cancer	5	11362066	0.0166	0.0263797	GCST90274818	5	11362066	0.0216	8.08e-06	Latency-associated peptide transforming growth factor beta 1 levels	0.00135002	3.5e-05	0.000369529	0.00138352	20.413	40.9189	19.918
rs60821320	A	C	A	C	-0.1083	0.0007	0.0779	0.078	Prostate cancer	12	95312882	0.015	0.9628	GCST90274818	12	95312882	0.0232	3.04e-06	Latency-associated peptide transforming growth factor beta 1 levels	0.00169294	1.55e-08	8.47e-06	0.00168501	21.6889	40.9189	21.7912
rs6827317	A	G	A	G	0.2159	-0.0135	0.0172	0.0196	Prostate cancer	4	10683051	0.0303	0.656299	GCST90274818	4	10683051	0.048	6.86e-06	Latency-associated peptide transforming growth factor beta 1 levels	0.00137122	1.42e-06	3.47e-05	0.0015759	23.256	40.9189	20.2313
rs7013321	A	G	A	G	-0.0608	0.0088	0.4469	0.449	Prostate cancer	8	106593558	0.0088	0.3183	GCST90274818	8	106593558	0.0121	5.04e-07	Latency-associated peptide transforming growth factor beta 1 levels	0.00176425	7.13e-06	7.42e-06	0.00182747	26.1551	40.9189	25.2485
rs7247630	T	C	T	C	0.1378	-0.0586	0.0525	0.0495	Prostate cancer	19	41981195	0.019	0.00204099	GCST90274818	19	41981195	0.0271	3.68e-07	Latency-associated peptide transforming growth factor beta 1 levels	0.0017526	6.78e-05	0.000102341	0.00188915	27.8742	40.9189	25.8559
rs73045256	A	G	A	G	-0.1921	0.0332	0.9378	0.9438	Prostate cancer	19	41811072	0.019	0.0795298	GCST90274818	19	41811072	0.0276	3.4e-12	Latency-associated peptide transforming growth factor beta 1 levels	0.00337952	2.18e-05	1.09e-09	0.00430512	61.7689	40.9189	48.4436
rs73112514	C	G	C	G	0.2053	0.0243	0.9689	0.9757	Prostate cancer	4	26142254	0.0327	0.4568	GCST90274818	4	26142254	0.0433	2.12e-06	Latency-associated peptide transforming growth factor beta 1 levels	0.00181096	3.94e-06	1.48e-05	0.00254008	31.5543	40.9189	22.4803
rs734515	A	G	A	G	-0.0594	-0.0061	0.7486	0.7466	Prostate cancer	17	9112300	0.0096	0.5263	GCST90274818	17	9112300	0.0133	7.96e-06	Latency-associated peptide transforming growth factor beta 1 levels	0.00135388	2.88e-06	5.08e-05	0.00132806	19.5657	40.9189	19.9466
rs7570818	A	G	A	G	-0.0849	0.0142	0.8857	0.8856	Prostate cancer	2	107310081	0.013	0.2748	GCST90274818	2	107310081	0.0183	3.5e-06	Latency-associated peptide transforming growth factor beta 1 levels	0.00145937	8.51e-06	4.59e-05	0.00145941	21.5242	40.9189	21.5235
rs7656674	A	T	A	T	0.0626	-0.0059	0.5957	0.6154	Prostate cancer	4	5793052	0.009	0.511601	GCST90274818	4	5793052	0.0121	2.3e-07	Latency-associated peptide transforming growth factor beta 1 levels	0.00187006	3.06e-06	2.27e-06	0.0018876	27.0173	40.9189	26.7657
rs7820135	T	C	T	C	-0.0747	0.0154	0.8321	0.8302	Prostate cancer	8	68719454	0.0107	0.151	GCST90274818	8	68719454	0.0155	1.44e-06	Latency-associated peptide transforming growth factor beta 1 levels	0.00157453	1.48e-05	3.48e-05	0.00155918	22.9995	40.9189	23.2262
rs10152968	A	G	A	G	0.0678	0.0012	0.7664	0.7684	Prostate cancer	15	60604436	0.0094	0.8972	GCST90274819	15	60604436	0.0153	9.36e-06	Leukemia inhibitory factor levels	0.0016628	1.16e-07	2.45e-05	0.00164595	19.4378	40.9189	19.6371
rs11127419	T	C	T	C	0.0707	-0.0013	0.3559	0.3548	Prostate cancer	2	3091471	0.0087	0.8844	GCST90274819	2	3091471	0.0153	3.82e-06	Leukemia inhibitory factor levels	0.0023031	1.59e-07	9.14e-06	0.00229166	21.2465	40.9189	21.3529
rs11608349	A	T	A	T	-0.3084	-0.0323	0.0168	0.0093	Prostate cancer	12	68026044	0.0534	0.5454	GCST90274819	12	68026044	0.0661	3.08e-06	Leukemia inhibitory factor levels	0.00232028	2.61e-06	1.28e-05	0.00314203	29.5021	40.9189	21.7684
rs116794364	C	G	C	G	-0.3015	0.0323	0.9851	0.9894	Prostate cancer	2	224292526	0.044	0.4637	GCST90274819	2	224292526	0.0631	1.77e-06	Leukemia inhibitory factor levels	0.00209862	3.84e-06	1.06e-05	0.00266853	29.047	40.9189	22.8305
rs117675814	T	C	T	C	-0.2448	0.0137	0.018	0.0131	Prostate cancer	7	67523386	0.0398	0.7304	GCST90274819	7	67523386	0.0544	6.8e-06	Leukemia inhibitory factor levels	0.00178206	8.45e-07	2.31e-05	0.00211854	24.0816	40.9189	20.25
rs117844161	A	G	A	G	0.1842	-0.0256	0.9695	0.9728	Prostate cancer	13	88387973	0.026	0.3237	GCST90274819	13	88387973	0.0408	6.34e-06	Leukemia inhibitory factor levels	0.00172743	6.91e-06	4.89e-05	0.00200658	23.6831	40.9189	20.3826
rs11883375	A	G	A	G	-0.1011	-0.0076	0.1385	0.149	Prostate cancer	19	54851842	0.013	0.5567	GCST90274819	19	54851842	0.0197	2.87e-07	Leukemia inhibitory factor levels	0.0022319	2.44e-06	1.89e-06	0.00243914	28.7887	40.9189	26.3372
rs12595568	T	G	T	G	-0.0652	0.0057	0.2544	0.2586	Prostate cancer	15	38990803	0.0093	0.541499	GCST90274819	15	38990803	0.0146	7.98e-06	Leukemia inhibitory factor levels	0.00168866	2.68e-06	3.84e-05	0.00161268	19.0442	40.9189	19.943
rs13105239	A	C	A	C	0.0575	0.0016	0.5333	0.5177	Prostate cancer	4	23472007	0.0082	0.8478	GCST90274819	4	23472007	0.013	9.73e-06	Leukemia inhibitory factor levels	0.00166025	2.71e-07	2.75e-05	0.00164579	19.393	40.9189	19.5636
rs1348602	T	G	T	G	-0.0782	0.0009	0.2297	0.2265	Prostate cancer	13	35704767	0.0096	0.927	GCST90274819	13	35704767	0.0173	6.18e-06	Leukemia inhibitory factor levels	0.00225987	6.27e-08	1.32e-05	0.00216404	19.5641	40.9189	20.4325
rs145344087	C	G	C	G	0.2548	-0.0137	0.021	0.0157	Prostate cancer	3	58954742	0.0386	0.7228	GCST90274819	3	58954742	0.0556	4.59e-06	Leukemia inhibitory factor levels	0.00203898	8.98e-07	1.5e-05	0.00266951	27.5133	40.9189	21.0014
rs147461732	A	G	A	G	0.2606	0.0271	0.0179	0.0115	Prostate cancer	15	80114266	0.0395	0.4929	GCST90274819	15	80114266	0.0583	7.82e-06	Leukemia inhibitory factor levels	0.00175841	3.36e-06	3.95e-05	0.00238774	27.149	40.9189	19.9807
rs150843753	T	G	T	G	0.1742	0.0068	0.9676	0.9681	Prostate cancer	16	78805709	0.0234	0.7724	GCST90274819	16	78805709	0.0385	6.05e-06	Leukemia inhibitory factor levels	0.00173534	6.02e-07	2.01e-05	0.00190269	22.4507	40.9189	20.4727
rs1534627	T	C	T	C	0.06	-0.0122	0.5978	0.594	Prostate cancer	10	13969539	0.0083	0.1403	GCST90274819	10	13969539	0.0132	5.48e-06	Leukemia inhibitory factor levels	0.00174951	1.54e-05	7.66e-05	0.00173113	20.4437	40.9189	20.6612
rs190222173	A	C	A	C	-0.3456	0.025	0.9882	0.9899	Prostate cancer	3	121028150	0.0474	0.5977	GCST90274819	3	121028150	0.0781	9.64e-06	Leukemia inhibitory factor levels	0.00195784	1.98e-06	3.5e-05	0.00278551	27.8826	40.9189	19.5815
rs234592	A	G	A	G	-0.0635	0.0032	0.5456	0.55	Prostate cancer	14	97087097	0.0081	0.6924	GCST90274819	14	97087097	0.0136	3.02e-06	Leukemia inhibitory factor levels	0.00191826	1.11e-06	1.18e-05	0.00199936	22.7241	40.9189	21.8007
rs332426	A	G	A	G	0.112	0.0037	0.0899	0.0972	Prostate cancer	19	6801966	0.0137	0.7895	GCST90274819	19	6801966	0.0238	2.53e-06	Leukemia inhibitory factor levels	0.00187527	5.2e-07	8.87e-06	0.00205265	24.2443	40.9189	22.1453
rs4326609	A	T	A	T	-0.0707	-0.0057	0.7435	0.7223	Prostate cancer	1	244347370	0.0099	0.5677	GCST90274819	1	244347370	0.0155	5.08e-06	Leukemia inhibitory factor levels	0.00183084	2.36e-06	2.35e-05	0.0019065	21.6668	40.9189	20.8054
rs4699986	T	G	T	G	0.0629	-0.0096	0.6927	0.6784	Prostate cancer	5	61150440	0.0089	0.2773	GCST90274819	5	61150440	0.0139	6.03e-06	Leukemia inhibitory factor levels	0.00173382	8.3e-06	5.25e-05	0.00168438	19.8923	40.9189	20.4773
rs62213023	T	C	T	C	-0.1676	-0.0275	0.0399	0.0376	Prostate cancer	21	43995327	0.0238	0.2487	GCST90274819	21	43995327	0.0374	7.42e-06	Leukemia inhibitory factor levels	0.00176729	9.52e-06	6.53e-05	0.00215212	24.4642	40.9189	20.0819
rs7225483	T	G	T	G	0.0671	-0.0053	0.486	0.4961	Prostate cancer	17	28341679	0.008	0.5091	GCST90274819	17	28341679	0.0143	2.7e-06	Leukemia inhibitory factor levels	0.002231	3.13e-06	1.28e-05	0.00224944	22.2002	40.9189	22.0178
rs74992559	A	G	A	G	0.1725	-0.0423	0.0351	0.0346	Prostate cancer	10	31490202	0.023	0.0662293	GCST90274819	10	31490202	0.0367	2.6e-06	Leukemia inhibitory factor levels	0.0018716	2.41e-05	6.31e-05	0.00201557	23.7954	40.9189	22.0926
rs80092539	A	T	A	T	0.0993	-0.0058	0.8758	0.8872	Prostate cancer	2	46125903	0.0134	0.6643	GCST90274819	2	46125903	0.0213	3.13e-06	Leukemia inhibitory factor levels	0.00191241	1.34e-06	1.28e-05	0.00214514	24.3846	40.9189	21.734
rs825264	A	G	A	G	-0.2119	-0.0509	0.0321	0.0265	Prostate cancer	2	222585468	0.0266	0.0557494	GCST90274819	2	222585468	0.0453	2.9e-06	Leukemia inhibitory factor levels	0.00212212	2.61e-05	6e-05	0.00279015	28.7882	40.9189	21.8809
rs9482537	C	G	C	G	0.1084	-0.0148	0.9095	0.9138	Prostate cancer	6	124651086	0.0151	0.3289	GCST90274819	6	124651086	0.0243	8.16e-06	Leukemia inhibitory factor levels	0.00175128	6.85e-06	5.79e-05	0.00193437	21.9841	40.9189	19.8997
rs9648464	T	C	T	C	0.0606	0.0088	0.4384	0.4471	Prostate cancer	7	4467714	0.0083	0.2895	GCST90274819	7	4467714	0.0135	7.16e-06	Leukemia inhibitory factor levels	0.00177329	8.01e-06	5.67e-05	0.00180831	20.5488	40.9189	20.1501
rs112883732	A	G	A	G	0.0639	-0.0022	0.2266	0.2157	Prostate cancer	2	174802976	0.01	0.8247	GCST90274820	2	174802976	0.0144	9.1e-06	Leukemia inhibitory factor receptor levels	0.00166852	3.45e-07	2.68e-05	0.00143118	16.8864	40.9189	19.6914
rs115938660	T	C	T	C	-0.2181	0.0281	0.0215	0.0216	Prostate cancer	5	110784241	0.0315	0.3733	GCST90274820	5	110784241	0.0467	3.01e-06	Leukemia inhibitory factor receptor levels	0.00185	5.67e-06	2.27e-05	0.00200143	23.6001	40.9189	21.8111
rs117117000	A	G	A	G	0.1586	-0.0365	0.961	0.9637	Prostate cancer	8	119917062	0.0274	0.1835	GCST90274820	8	119917062	0.0333	1.91e-06	Leukemia inhibitory factor receptor levels	0.0019216	1.27e-05	2.65e-05	0.00188549	22.2568	40.9189	22.6839
rs1275374	A	G	A	G	-0.0611	-0.006	0.4056	0.4011	Prostate cancer	8	118638630	0.0087	0.4914	GCST90274820	8	118638630	0.0137	8.2e-06	Leukemia inhibitory factor receptor levels	0.00175185	3.39e-06	4.13e-05	0.00180007	20.4388	40.9189	19.8903
rs12754806	A	G	A	G	0.0563	0.0184	0.4817	0.4727	Prostate cancer	1	238821453	0.008	0.0220399	GCST90274820	1	238821453	0.0122	3.94e-06	Leukemia inhibitory factor receptor levels	0.00180669	3.77e-05	0.000149913	0.00158272	18.6518	40.9189	21.296
rs141933232	A	G	A	G	-0.2724	-0.0065	0.0169	0.0276	Prostate cancer	17	36964094	0.0295	0.827	GCST90274820	17	36964094	0.0546	6.07e-07	Leukemia inhibitory factor receptor levels	0.00211888	3.46e-07	2.25e-06	0.00246563	28.9736	40.9189	24.8902
rs143212977	A	G	A	G	0.2467	0.0432	0.0184	0.0168	Prostate cancer	12	115088443	0.0343	0.208	GCST90274820	12	115088443	0.0558	9.82e-06	Leukemia inhibitory factor receptor levels	0.00172162	1.13e-05	9.35e-05	0.00219847	24.9724	40.9189	19.5465
rs147006060	A	G	A	G	-0.2602	-0.0353	0.0179	0.014	Prostate cancer	21	43780807	0.0412	0.3918	GCST90274820	21	43780807	0.0566	4.28e-06	Leukemia inhibitory factor receptor levels	0.00179191	5.23e-06	2.97e-05	0.00238042	28.0915	40.9189	21.134
rs1604713	A	C	A	C	-0.1451	-0.0075	0.9399	0.951	Prostate cancer	8	107256388	0.0221	0.735401	GCST90274820	8	107256388	0.0322	6.6e-06	Leukemia inhibitory factor receptor levels	0.00178839	8.21e-07	2.23e-05	0.0023786	27.0233	40.9189	20.3059
rs1645151	C	G	C	G	0.0745	-0.0031	0.6059	0.5998	Prostate cancer	5	95049215	0.009	0.727999	GCST90274820	5	95049215	0.0164	5.55e-06	Leukemia inhibitory factor receptor levels	0.00233766	8.46e-07	1.55e-05	0.00265064	23.4062	40.9189	20.636
rs1690678	A	C	A	C	0.0904	-0.0102	0.1109	0.1151	Prostate cancer	10	27930818	0.0127	0.4232	GCST90274820	10	27930818	0.0192	2.5e-06	Leukemia inhibitory factor receptor levels	0.00187802	4.6e-06	1.73e-05	0.00161157	19.0182	40.9189	22.1684
rs2289779	T	G	T	G	0.0788	-0.0082	0.5419	0.5415	Prostate cancer	5	38527228	0.0087	0.345	GCST90274820	5	38527228	0.0134	4.09e-09	Leukemia inhibitory factor receptor levels	0.00304184	6.33e-06	6.83e-08	0.00308292	35.0498	40.9189	34.5814
rs3963364	A	C	A	C	-0.0951	0.0146	0.1784	0.1654	Prostate cancer	3	12385357	0.0115	0.2024	GCST90274820	3	12385357	0.0203	2.8e-06	Leukemia inhibitory factor receptor levels	0.00231678	1.15e-05	2.51e-05	0.00265122	25.1233	40.9189	21.9467
rs41307428	T	C	T	C	0.2027	0.0017	0.067	0.0465	Prostate cancer	9	136336804	0.0205	0.9358	GCST90274820	9	136336804	0.0299	1.21e-11	Leukemia inhibitory factor receptor levels	0.00388886	4.9e-08	8.94e-11	0.00513682	60.7828	40.9189	45.9584
rs452976	T	C	T	C	0.0692	0.0124	0.8025	0.804	Prostate cancer	5	84611579	0.0102	0.2243	GCST90274820	5	84611579	0.0153	6.1e-06	Leukemia inhibitory factor receptor levels	0.00173529	1.05e-05	6.21e-05	0.00151794	17.8903	40.9189	20.4564
rs4689540	T	C	T	C	0.0611	-0.0057	0.5834	0.5781	Prostate cancer	4	6753471	0.009	0.528901	GCST90274820	4	6753471	0.0138	9.53e-06	Leukemia inhibitory factor receptor levels	0.0017266	2.86e-06	4.42e-05	0.00181467	20.6049	40.9189	19.6031
rs4937122	T	G	T	G	0.1262	-0.0123	0.9129	0.9048	Prostate cancer	11	126228659	0.0149	0.4091	GCST90274820	11	126228659	0.0248	3.61e-07	Leukemia inhibitory factor receptor levels	0.00227951	4.86e-06	3.06e-06	0.00253274	28.7789	40.9189	25.895
rs6002001	A	G	A	G	0.6489	-0.1088	0.0043	0.0056	Prostate cancer	22	41054967	0.0575	0.0584198	GCST90274820	22	41054967	0.1417	4.66e-06	Leukemia inhibitory factor receptor levels	0.0030481	2.55e-05	4.9e-05	0.00360564	24.8206	40.9189	20.9708
rs62258077	T	C	T	C	-0.063	-0.018	0.6603	0.6513	Prostate cancer	3	58363371	0.0086	0.0361402	GCST90274820	3	58363371	0.013	1.26e-06	Leukemia inhibitory factor receptor levels	0.00199306	3.12e-05	4.68e-05	0.00178052	20.9763	40.9189	23.4852
rs635634	T	C	T	C	-0.2885	0.0057	0.1918	0.2011	Prostate cancer	9	136155000	0.0102	0.5797	GCST90274820	9	136155000	0.0153	2.61e-79	Leukemia inhibitory factor receptor levels	0.0292939	2.23e-06	2.22e-71	0.0258041	312.077	40.9189	355.557
rs6671847	A	G	A	G	-0.0604	-0.0049	0.4812	0.4834	Prostate cancer	1	161478810	0.0082	0.5486	GCST90274820	1	161478810	0.0135	7.67e-06	Leukemia inhibitory factor receptor levels	0.00176302	2.55e-06	3.49e-05	0.0018215	20.6826	40.9189	20.0173
rs72730728	A	T	A	T	0.1414	0.0394	0.9403	0.945	Prostate cancer	5	36424241	0.0201	0.0506606	GCST90274820	5	36424241	0.0302	2.84e-06	Leukemia inhibitory factor receptor levels	0.00193047	2.74e-05	7.31e-05	0.00224476	25.4993	40.9189	21.9222
rs72837682	T	C	T	C	-0.08	-0.0035	0.7807	0.7832	Prostate cancer	17	7063650	0.0105	0.736	GCST90274820	17	7063650	0.0172	3.3e-06	Leukemia inhibitory factor receptor levels	0.00190507	7.92e-07	1.18e-05	0.00219146	24.8925	40.9189	21.6333
rs73157388	T	C	T	C	-0.1306	0.0299	0.9229	0.9335	Prostate cancer	7	79349730	0.0182	0.1	GCST90274820	7	79349730	0.0285	4.6e-06	Leukemia inhibitory factor receptor levels	0.00184931	1.92e-05	7.59e-05	0.00242731	27.5781	40.9189	20.9989
rs778016	A	G	A	G	-0.0681	0.0109	0.2875	0.2839	Prostate cancer	6	68918580	0.009	0.2258	GCST90274820	6	68918580	0.0145	2.65e-06	Leukemia inhibitory factor receptor levels	0.00222735	1.05e-05	2.37e-05	0.00189997	18.8093	40.9189	22.0576
rs78981063	A	G	A	G	-0.1377	0.0015	0.9558	0.9441	Prostate cancer	2	84195883	0.0195	0.9367	GCST90274820	2	84195883	0.0302	5.13e-06	Leukemia inhibitory factor receptor levels	0.00176145	4.22e-08	1.32e-05	0.00160209	18.9061	40.9189	20.79
rs9313148	C	G	C	G	-0.0824	-0.0056	0.1414	0.1427	Prostate cancer	5	6378192	0.0121	0.645	GCST90274820	5	6378192	0.0173	1.91e-06	Leukemia inhibitory factor receptor levels	0.00192294	1.53e-06	8.81e-06	0.00164864	19.4447	40.9189	22.6862
rs11214549	A	G	A	G	-0.1673	0.0599	0.0305	0.0286	Prostate cancer	11	113108311	0.0295	0.04271	GCST90274821	11	113108311	0.0376	8.61e-06	Monocyte chemoattractant protein-1 levels	0.00134224	2.94e-05	0.000311313	0.00165527	24.4226	40.9189	19.7978
rs11639226	A	C	A	C	0.0615	0.0093	0.4782	0.4811	Prostate cancer	15	91387220	0.0099	0.3453	GCST90274821	15	91387220	0.0133	3.76e-06	Monocyte chemoattractant protein-1 levels	0.00149478	6.29e-06	3.82e-05	0.00188753	27.0106	40.9189	21.3819
rs117265389	C	G	C	G	0.1734	-0.0155	0.0256	0.0246	Prostate cancer	16	4938452	0.0273	0.570401	GCST90274821	16	4938452	0.0377	4.24e-06	Monocyte chemoattractant protein-1 levels	0.00143404	2.3e-06	2.68e-05	0.00150005	22.1304	40.9189	21.1551
rs117317477	T	G	T	G	-0.3227	0.066	0.0125	0.0119	Prostate cancer	22	21921920	0.0455	0.1464	GCST90274821	22	21921920	0.0704	4.57e-06	Monocyte chemoattractant protein-1 levels	0.00178911	1.5e-05	6.36e-05	0.00257084	30.2156	40.9189	21.0113
rs117510656	T	C	T	C	-0.2587	-0.0315	0.9806	0.99	Prostate cancer	11	87277670	0.0435	0.4684	GCST90274821	11	87277670	0.0562	4.16e-06	Monocyte chemoattractant protein-1 levels	0.00148135	3.74e-06	3.13e-05	0.00254634	36.4622	40.9189	21.1895
rs11870164	T	C	T	C	0.0751	-0.0129	0.2772	0.286	Prostate cancer	17	32567679	0.0096	0.1784	GCST90274821	17	32567679	0.013	7.61e-09	Monocyte chemoattractant protein-1 levels	0.00226036	1.29e-05	3.79e-07	0.00226007	33.3685	40.9189	33.3728
rs12075	A	G	A	G	0.1694	0.0063	0.5552	0.5736	Prostate cancer	1	159175354	0.0082	0.4433	GCST90274821	1	159175354	0.0113	8.39e-51	Monocyte chemoattractant protein-1 levels	0.0150297	4.21e-06	1.85e-44	0.0141733	211.746	40.9189	224.735
rs12133241	T	G	T	G	0.0728	-0.0052	0.8345	0.8405	Prostate cancer	1	14260220	0.011	0.6368	GCST90274821	1	14260220	0.0157	3.54e-06	Monocyte chemoattractant protein-1 levels	0.00145944	1.59e-06	2e-05	0.00146392	21.5673	40.9189	21.5012
rs12367122	A	G	A	G	0.0739	0.0194	0.1756	0.177	Prostate cancer	12	30998369	0.0106	0.0683502	GCST90274821	12	30998369	0.0159	3.35e-06	Monocyte chemoattractant protein-1 levels	0.00151025	2.39e-05	0.00010875	0.00158118	22.6182	40.9189	21.602
rs142018247	T	C	T	C	0.1966	0.0029	0.02	0.02	Prostate cancer	2	114120803	0.0302	0.9222	GCST90274821	2	114120803	0.0442	8.67e-06	Monocyte chemoattractant protein-1 levels	0.00134188	6.57e-08	2.66e-05	0.00151514	22.3428	40.9189	19.7844
rs146186562	T	G	T	G	-0.2293	-0.0216	0.9789	0.9842	Prostate cancer	6	20408729	0.0392	0.5822	GCST90274821	6	20408729	0.0497	3.96e-06	Monocyte chemoattractant protein-1 levels	0.00148809	2.16e-06	2.37e-05	0.00217199	31.0901	40.9189	21.2861
rs148307902	A	G	A	G	0.2553	0.0659	0.0243	0.0116	Prostate cancer	5	2885014	0.0482	0.1719	GCST90274821	5	2885014	0.0538	2.08e-06	Monocyte chemoattractant protein-1 levels	0.00162958	1.33e-05	3.83e-05	0.00309068	42.7712	40.9189	22.5184
rs149604038	C	G	C	G	-0.2813	0.0609	0.9851	0.9856	Prostate cancer	3	185463545	0.0409	0.1371	GCST90274821	3	185463545	0.0556	4.21e-07	Monocyte chemoattractant protein-1 levels	0.00185196	1.58e-05	1.19e-05	0.00232293	32.1218	40.9189	25.597
rs1788443	T	C	T	C	-0.0537	0.0034	0.5055	0.5069	Prostate cancer	21	43981957	0.0082	0.6754	GCST90274821	21	43981957	0.0119	6.4e-06	Monocyte chemoattractant protein-1 levels	0.00142369	1.23e-06	3.02e-05	0.00144167	20.6211	40.9189	20.3636
rs181998213	T	C	T	C	0.3723	0.0602	0.9872	0.9844	Prostate cancer	3	46519788	0.0371	0.1044	GCST90274821	3	46519788	0.0695	8.47e-08	Monocyte chemoattractant protein-1 levels	0.00200505	1.88e-05	4.06e-06	0.00350293	50.2082	40.9189	28.6957
rs182599222	A	T	A	T	-0.4028	0.0292	0.991	0.992	Prostate cancer	8	115072929	0.0485	0.5481	GCST90274821	8	115072929	0.0864	3.13e-06	Monocyte chemoattractant protein-1 levels	0.00191431	2.58e-06	1.57e-05	0.00289418	32.892	40.9189	21.7346
rs190108694	A	G	A	G	-0.2084	0.0227	0.0286	0.0279	Prostate cancer	18	75133468	0.0292	0.4379	GCST90274821	18	75133468	0.0455	4.64e-06	Monocyte chemoattractant protein-1 levels	0.0018493	4.31e-06	2.77e-05	0.00241318	27.3905	40.9189	20.9784
rs207311	T	C	T	C	0.0579	0.0074	0.6697	0.6657	Prostate cancer	4	19075878	0.0094	0.4298	GCST90274821	4	19075878	0.0126	4.32e-06	Monocyte chemoattractant protein-1 levels	0.00147623	4.42e-06	3.52e-05	0.00148312	21.2149	40.9189	21.1162
rs2544916	A	T	A	T	0.1653	0.0103	0.9698	0.9755	Prostate cancer	5	100158495	0.0276	0.7094	GCST90274821	5	100158495	0.0366	6.29e-06	Monocyte chemoattractant protein-1 levels	0.00138399	9.93e-07	2.91e-05	0.00160053	23.5944	40.9189	20.3978
rs34292320	T	C	T	C	-0.0684	-0.0026	0.2742	0.2794	Prostate cancer	13	43553825	0.0092	0.773599	GCST90274821	13	43553825	0.0134	3.32e-07	Monocyte chemoattractant protein-1 levels	0.00182092	5.69e-07	1.79e-06	0.0018622	26.6474	40.9189	26.0557
rs35728689	A	G	A	G	0.3004	0.0092	0.0959	0.0918	Prostate cancer	3	46390228	0.0143	0.5203	GCST90274821	3	46390228	0.0198	5.44e-52	Monocyte chemoattractant protein-1 levels	0.0153862	2.95e-06	9.61e-46	0.0156482	234.162	40.9189	230.181
rs4682862	A	G	A	G	0.0576	-0.0019	0.6154	0.6094	Prostate cancer	3	42877413	0.0083	0.8189	GCST90274821	3	42877413	0.0122	2.34e-06	Monocyte chemoattractant protein-1 levels	0.00155822	3.74e-07	9.56e-06	0.00157051	22.4669	40.9189	22.2908
rs72730728	A	T	A	T	0.1238	0.0394	0.9416	0.945	Prostate cancer	5	36424241	0.0201	0.0506606	GCST90274821	5	36424241	0.0272	5.33e-06	Monocyte chemoattractant protein-1 levels	0.00144829	2.74e-05	0.000184798	0.00168559	24.1159	40.9189	20.7159
rs7619350	A	G	A	G	0.0986	-0.0071	0.118	0.111	Prostate cancer	3	132269435	0.0128	0.5806	GCST90274821	3	132269435	0.0201	9.32e-07	Monocyte chemoattractant protein-1 levels	0.0020417	2.19e-06	5.22e-06	0.00202365	23.8504	40.9189	24.0637
rs77128226	T	C	T	C	-0.1063	0.0243	0.0875	0.0748	Prostate cancer	20	15213518	0.016	0.1305	GCST90274821	20	15213518	0.0218	1.08e-06	Monocyte chemoattractant protein-1 levels	0.00166193	1.64e-05	2.89e-05	0.00180442	25.8191	40.9189	23.7768
rs77344300	T	C	T	C	-0.1381	-0.0207	0.0491	0.0487	Prostate cancer	9	78838039	0.0221	0.3495	GCST90274821	9	78838039	0.0293	2.44e-06	Monocyte chemoattractant protein-1 levels	0.00150579	6.26e-06	2.74e-05	0.00178088	26.2809	40.9189	22.2153
rs79697698	T	C	T	C	-0.348	0.0285	0.0136	0.0128	Prostate cancer	20	9086080	0.0402	0.4786	GCST90274821	20	9086080	0.0653	9.86e-08	Monocyte chemoattractant protein-1 levels	0.00206126	3.58e-06	1.1e-06	0.00324923	44.8226	40.9189	28.4009
rs9324105	T	C	T	C	-0.0775	-0.0125	0.1395	0.1461	Prostate cancer	14	29273195	0.0115	0.2783	GCST90274821	14	29273195	0.0175	9.49e-06	Monocyte chemoattractant protein-1 levels	0.00137123	8.42e-06	0.000101319	0.00144198	20.6255	40.9189	19.6122
rs9942602	T	C	T	C	0.0618	-0.0086	0.4922	0.4855	Prostate cancer	7	17977054	0.0083	0.2969	GCST90274821	7	17977054	0.0117	1.28e-07	Monocyte chemoattractant protein-1 levels	0.00189103	7.65e-06	2.55e-06	0.00190916	28.168	40.9189	27.9001
rs12523126	A	T	A	T	0.1121	0.0058	0.0746	0.071	Prostate cancer	5	165649355	0.0163	0.7191	GCST90274822	5	165649355	0.0232	1.35e-06	Monocyte chemoattractant protein 2 levels	0.00163161	9.03e-07	7e-06	0.00173504	24.8299	40.9189	23.3472
rs2005792	A	G	A	G	0.1744	0.0095	0.7531	0.7495	Prostate cancer	17	32565404	0.0097	0.3229	GCST90274822	17	32565404	0.0136	1.21e-37	Monocyte chemoattractant protein 2 levels	0.0110428	6.84e-06	1.61e-32	0.0113109	168.481	40.9189	164.443
rs3136674	T	C	T	C	-0.1803	0.0095	0.9455	0.951	Prostate cancer	17	32682616	0.0185	0.6053	GCST90274822	17	32682616	0.0267	1.45e-11	Monocyte chemoattractant protein 2 levels	0.00308536	1.88e-06	3.8e-10	0.00335027	49.5288	40.9189	45.6004
rs744156	A	C	A	C	-0.1588	0.0228	0.9594	0.9611	Prostate cancer	16	4700056	0.0229	0.3185	GCST90274822	16	4700056	0.0325	1.03e-06	Monocyte chemoattractant protein 2 levels	0.00174459	7.07e-06	1.26e-05	0.00196452	26.8902	40.9189	23.8745
rs75580960	T	C	T	C	-0.0904	0.0264	0.8703	0.8659	Prostate cancer	19	2151761	0.0123	0.0320302	GCST90274822	19	2151761	0.0188	1.52e-06	Monocyte chemoattractant protein 2 levels	0.00174568	3.28e-05	7.33e-05	0.00184491	24.4385	40.9189	23.1218
rs116170440	A	G	A	G	-0.257	-0.027	0.0167	0.0151	Prostate cancer	4	36138371	0.0341	0.4292	GCST90274823	4	36138371	0.0579	9.05e-06	Monocyte chemoattractant protein-3 levels	0.00181322	4.47e-06	4.85e-05	0.0021692	23.5782	40.9189	19.7019
rs117550373	T	G	T	G	-0.1405	-0.0113	0.0501	0.0479	Prostate cancer	14	76638061	0.0199	0.5695	GCST90274823	14	76638061	0.0314	7.66e-06	Monocyte chemoattractant protein-3 levels	0.0016996	2.3e-06	3.49e-05	0.00187888	22.1372	40.9189	20.0213
rs12075	A	G	A	G	-0.0899	0.0063	0.5624	0.5736	Prostate cancer	1	159175354	0.0082	0.4433	GCST90274823	1	159175354	0.013	4.67e-12	Monocyte chemoattractant protein-3 levels	0.00404391	4.21e-06	1.33e-10	0.00397807	47.0408	40.9189	47.8225
rs12142504	T	C	T	C	0.0778	0.0013	0.6951	0.6887	Prostate cancer	1	192799485	0.0092	0.8858	GCST90274823	1	192799485	0.0166	2.78e-06	Monocyte chemoattractant protein-3 levels	0.00231999	1.42e-07	6.83e-06	0.00256563	24.2973	40.9189	21.9656
rs12661848	T	G	T	G	0.0655	0.012	0.5602	0.5457	Prostate cancer	6	123906471	0.0084	0.1544	GCST90274823	6	123906471	0.0147	8.36e-06	Monocyte chemoattractant protein-3 levels	0.00200407	1.46e-05	8.2e-05	0.00211403	20.9457	40.9189	19.854
rs139796674	A	G	A	G	0.2334	-0.0415	0.0249	0.0247	Prostate cancer	9	110584352	0.0305	0.1738	GCST90274823	9	110584352	0.0492	2.1e-06	Monocyte chemoattractant protein-3 levels	0.00198182	1.32e-05	2.8e-05	0.00264533	30.0591	40.9189	22.5046
rs146174820	A	G	A	G	0.2663	-0.0333	0.0247	0.0231	Prostate cancer	2	68614232	0.0346	0.3367	GCST90274823	2	68614232	0.0547	1.13e-06	Monocyte chemoattractant protein-3 levels	0.00225924	6.6e-06	8.97e-06	0.0034167	35.8853	40.9189	23.7011
rs147793446	A	G	A	G	0.1941	-0.0365	0.0345	0.0265	Prostate cancer	1	201769310	0.026	0.16	GCST90274823	1	201769310	0.0413	2.6e-06	Monocyte chemoattractant protein-3 levels	0.00187342	1.41e-05	3.76e-05	0.00250988	29.6106	40.9189	22.0877
rs148859911	A	G	A	G	0.1507	-0.0067	0.05	0.0445	Prostate cancer	11	42245173	0.0214	0.7536	GCST90274823	11	42245173	0.0328	4.34e-06	Monocyte chemoattractant protein-3 levels	0.00179045	6.99e-07	1.53e-05	0.0021575	25.4465	40.9189	21.1095
rs16947053	A	G	A	G	0.2264	-0.0046	0.9779	0.9791	Prostate cancer	15	93092575	0.0286	0.8713	GCST90274823	15	93092575	0.0487	3.34e-06	Monocyte chemoattractant protein-3 levels	0.00183112	1.84e-07	9.92e-06	0.00221549	26.1586	40.9189	21.612
rs182239847	T	G	T	G	-0.1716	0.042	0.9096	0.9578	Prostate cancer	4	144892144	0.0239	0.0790205	GCST90274823	4	144892144	0.0359	1.75e-06	Monocyte chemoattractant protein-3 levels	0.00241168	2.2e-05	2.88e-05	0.00484265	45.9906	40.9189	22.8479
rs187435509	T	G	T	G	0.171	-0.0299	0.0356	0.0304	Prostate cancer	16	4844729	0.0249	0.2293	GCST90274823	16	4844729	0.0381	7.18e-06	Monocyte chemoattractant protein-3 levels	0.00170737	1.03e-05	7.03e-05	0.00200784	23.6959	40.9189	20.1438
rs200447680	A	C	A	C	0.1863	0.0325	0.9612	0.9725	Prostate cancer	20	15607887	0.0257	0.2065	GCST90274823	20	15607887	0.041	5.52e-06	Monocyte chemoattractant protein-3 levels	0.00201363	1.14e-05	5.01e-05	0.00258882	26.5601	40.9189	20.647
rs2228467	T	C	T	C	-0.3169	-0.0002	0.9268	0.9335	Prostate cancer	3	42906116	0.0166	0.9915	GCST90274823	3	42906116	0.0252	2.88e-36	Monocyte chemoattractant protein-3 levels	0.0132467	1.03e-09	1.99e-33	0.0136261	162.733	40.9189	158.141
rs28571854	T	C	T	C	-0.1098	-0.0046	0.0785	0.0741	Prostate cancer	9	16472947	0.0157	0.7671	GCST90274823	9	16472947	0.0247	8.78e-06	Monocyte chemoattractant protein-3 levels	0.0016757	6.12e-07	2.83e-05	0.00174421	20.5705	40.9189	19.7611
rs28667091	T	G	T	G	-0.0613	-0.0063	0.4117	0.4208	Prostate cancer	4	47682997	0.0084	0.448	GCST90274823	4	47682997	0.0133	4.05e-06	Monocyte chemoattractant protein-3 levels	0.00180007	4.01e-06	2.48e-05	0.00182025	21.4816	40.9189	21.2431
rs4146770	T	C	T	C	-0.0933	0.0148	0.7978	0.8034	Prostate cancer	3	151048544	0.0101	0.1432	GCST90274823	3	151048544	0.0165	1.56e-08	Monocyte chemoattractant protein-3 levels	0.00271195	1.53e-05	5.13e-07	0.00280846	33.1149	40.9189	31.9739
rs7213460	A	G	A	G	0.0942	-0.0072	0.4161	0.4271	Prostate cancer	17	32522613	0.0085	0.3961	GCST90274823	17	32522613	0.0132	9.58e-13	Monocyte chemoattractant protein-3 levels	0.00430535	5.12e-06	3.76e-11	0.00431189	51.0054	40.9189	50.9277
rs72689930	T	G	T	G	0.1624	-0.0074	0.9529	0.9618	Prostate cancer	4	158925763	0.0239	0.756401	GCST90274823	4	158925763	0.0363	7.68e-06	Monocyte chemoattractant protein-3 levels	0.00169605	6.84e-07	2.56e-05	0.00236739	27.9564	40.9189	20.0151
rs72793575	A	G	A	G	0.1043	-0.0162	0.1037	0.0821	Prostate cancer	2	23771966	0.0161	0.3144	GCST90274823	2	23771966	0.0235	9.07e-06	Monocyte chemoattractant protein-3 levels	0.00173514	7.22e-06	6.53e-05	0.00202223	22.9644	40.9189	19.6985
rs72939501	A	G	A	G	-0.1014	0.0018	0.1082	0.0967	Prostate cancer	18	60781974	0.0141	0.8994	GCST90274823	18	60781974	0.0226	7.23e-06	Monocyte chemoattractant protein-3 levels	0.00177314	1.16e-07	1.87e-05	0.00198427	22.5324	40.9189	20.1307
rs7327202	C	G	C	G	-0.0969	-0.0021	0.1497	0.1519	Prostate cancer	13	58931726	0.0114	0.8557	GCST90274823	13	58931726	0.0194	5.89e-07	Monocyte chemoattractant protein-3 levels	0.00228342	2.42e-07	1.94e-06	0.0023904	26.1202	40.9189	24.9485
rs74157668	T	C	T	C	0.1574	0.0161	0.0404	0.033	Prostate cancer	10	121143312	0.0229	0.4837	GCST90274823	10	121143312	0.0343	4.46e-06	Monocyte chemoattractant protein-3 levels	0.00178458	3.52e-06	2.55e-05	0.00192093	22.6702	40.9189	21.0582
rs78848134	T	C	T	C	0.2441	-0.0046	0.0198	0.0155	Prostate cancer	20	41126657	0.0347	0.8943	GCST90274823	20	41126657	0.0514	2.04e-06	Monocyte chemoattractant protein-3 levels	0.00199294	1.25e-07	5.88e-06	0.00231284	26.1818	40.9189	22.5533
rs8129542	A	T	A	T	-0.1022	0.0171	0.1218	0.1263	Prostate cancer	21	45846823	0.0145	0.2393	GCST90274823	21	45846823	0.0228	7.38e-06	Monocyte chemoattractant protein-3 levels	0.00195279	9.92e-06	5.89e-05	0.00223446	22.9971	40.9189	20.0924
rs9968876	T	G	T	G	-0.1046	-0.0073	0.8991	0.8992	Prostate cancer	6	100087282	0.0135	0.5887	GCST90274823	6	100087282	0.0221	2.21e-06	Monocyte chemoattractant protein-3 levels	0.00189934	2.08e-06	1.11e-05	0.00198515	23.4156	40.9189	22.4016
rs10140592	A	G	A	G	0.2704	0.0077	0.0209	0.0106	Prostate cancer	14	70451473	0.0409	0.8502	GCST90274824	14	70451473	0.0553	1.01e-06	Monocyte chemoattractant protein-4 levels	0.0017357	2.53e-07	4.06e-06	0.00299238	41.2717	40.9189	23.9091
rs113911480	T	G	T	G	-0.1502	0.0423	0.9632	0.9655	Prostate cancer	14	29113167	0.024	0.0774997	GCST90274824	14	29113167	0.0333	6.47e-06	Monocyte chemoattractant protein-4 levels	0.00138142	2.21e-05	0.000178927	0.00159932	23.5588	40.9189	20.3447
rs114438927	A	G	A	G	0.2261	0.0264	0.0163	0.0159	Prostate cancer	15	30072182	0.0329	0.4218	GCST90274824	15	30072182	0.05	6.13e-06	Monocyte chemoattractant protein-4 levels	0.00158879	4.59e-06	4.23e-05	0.00163939	21.1007	40.9189	20.4485
rs115511138	A	G	A	G	0.1956	-0.0164	0.9694	0.9782	Prostate cancer	4	115566991	0.0341	0.6313	GCST90274824	4	115566991	0.042	3.21e-06	Monocyte chemoattractant protein-4 levels	0.00155324	1.65e-06	1.74e-05	0.00226982	31.7179	40.9189	21.689
rs12075	A	G	A	G	0.189	0.0063	0.5553	0.5736	Prostate cancer	1	159175354	0.0082	0.4433	GCST90274824	1	159175354	0.0114	9.89e-62	Monocyte chemoattractant protein-4 levels	0.0183169	4.21e-06	4.35e-54	0.017642	264.552	40.9189	274.861
rs144118870	A	G	A	G	0.1749	-0.0242	0.963	0.9774	Prostate cancer	6	31214807	0.027	0.3697	GCST90274824	6	31214807	0.0368	2.01e-06	Monocyte chemoattractant protein-4 levels	0.00153083	5.73e-06	2.2e-05	0.00217991	32.1867	40.9189	22.5883
rs144982290	T	C	T	C	0.2271	0.0708	0.025	0.0127	Prostate cancer	4	153541434	0.0496	0.153	GCST90274824	4	153541434	0.05	5.57e-06	Monocyte chemoattractant protein-4 levels	0.00149279	1.45e-05	9.41e-05	0.00251425	34.7816	40.9189	20.6298
rs148945704	C	G	C	G	-0.2016	-0.0175	0.0179	0.0169	Prostate cancer	2	160090389	0.0329	0.5936	GCST90274824	2	160090389	0.0456	9.82e-06	Monocyte chemoattractant protein-4 levels	0.00137167	2.02e-06	5.12e-05	0.00142896	20.3632	40.9189	19.5457
rs181250	T	C	T	C	-0.1032	-0.0156	0.8805	0.8809	Prostate cancer	17	56210459	0.0127	0.2214	GCST90274824	17	56210459	0.0208	6.99e-07	Monocyte chemoattractant protein-4 levels	0.00212937	1.08e-05	9.48e-06	0.00224123	25.9129	40.9189	24.6169
rs2192410	C	G	C	G	0.072	0.0198	0.1934	0.1831	Prostate cancer	3	172370658	0.0111	0.0737497	GCST90274824	3	172370658	0.0158	5.19e-06	Monocyte chemoattractant protein-4 levels	0.00161542	2.27e-05	0.00012106	0.00161737	20.791	40.9189	20.7659
rs2497351	T	C	T	C	0.0668	-0.0162	0.2018	0.1992	Prostate cancer	10	94520346	0.0104	0.1201	GCST90274824	10	94520346	0.0145	4.09e-06	Monocyte chemoattractant protein-4 levels	0.00143837	1.73e-05	9.58e-05	0.00143753	21.211	40.9189	21.2235
rs2631360	A	G	A	G	0.0609	-0.0079	0.5448	0.541	Prostate cancer	5	131707429	0.008	0.3247	GCST90274824	5	131707429	0.0131	3.34e-06	Monocyte chemoattractant protein-4 levels	0.00183126	6.95e-06	2.81e-05	0.00183952	21.7095	40.9189	21.6119
rs2721961	T	G	T	G	-0.1201	0.0296	0.7293	0.7225	Prostate cancer	8	116657911	0.0089	0.000947109	GCST90274824	8	116657911	0.0133	1.72e-19	Monocyte chemoattractant protein-4 levels	0.00567545	7.89e-05	3.38e-14	0.00569522	81.8279	40.9189	81.5423
rs3136676	A	G	A	G	0.3903	0.0047	0.9384	0.9463	Prostate cancer	17	32683289	0.018	0.792899	GCST90274824	17	32683289	0.0251	1.6e-54	Monocyte chemoattractant protein-4 levels	0.0161544	4.86e-07	9.82e-49	0.0176115	263.996	40.9189	241.796
rs34202150	T	C	T	C	0.08	0.0217	0.8698	0.8803	Prostate cancer	16	24019294	0.0143	0.1292	GCST90274824	16	24019294	0.0181	9.88e-06	Monocyte chemoattractant protein-4 levels	0.00136559	1.64e-05	0.000178122	0.00144957	20.7387	40.9189	19.5354
rs3917900	A	G	A	G	0.1557	0.0004	0.6401	0.629	Prostate cancer	17	32587314	0.0089	0.967	GCST90274824	17	32587314	0.012	1.7e-38	Monocyte chemoattractant protein-4 levels	0.0113015	1.44e-08	8.46e-35	0.0111696	166.364	40.9189	168.351
rs438824	A	G	A	G	-0.0548	-0.0109	0.4985	0.5091	Prostate cancer	9	102016891	0.009	0.2264	GCST90274824	9	102016891	0.0121	5.93e-06	Monocyte chemoattractant protein-4 levels	0.0014338	1.05e-05	7.97e-05	0.00150151	21.4813	40.9189	20.5112
rs4980395	T	C	T	C	0.0748	0.0049	0.184	0.1865	Prostate cancer	11	1876594	0.0108	0.6482	GCST90274824	11	1876594	0.0164	5.09e-06	Monocyte chemoattractant protein-4 levels	0.00145403	1.47e-06	2.6e-05	0.00168012	24.0426	40.9189	20.8025
rs55842014	A	G	A	G	-0.0638	-0.0062	0.3598	0.3495	Prostate cancer	3	46289113	0.0086	0.4752	GCST90274824	3	46289113	0.0131	1.11e-06	Monocyte chemoattractant protein-4 levels	0.00190887	3.71e-06	8.16e-06	0.0018752	23.3	40.9189	23.7191
rs56003568	C	G	C	G	0.0569	-0.0088	0.2956	0.2992	Prostate cancer	2	203491699	0.0089	0.323	GCST90274824	2	203491699	0.0126	6.31e-06	Monocyte chemoattractant protein-4 levels	0.00138236	6.97e-06	6.61e-05	0.00134827	19.8896	40.9189	20.3931
rs62055193	C	G	C	G	0.093	-0.0044	0.2384	0.2322	Prostate cancer	16	74410477	0.0122	0.715899	GCST90274824	16	74410477	0.0196	2.09e-06	Monocyte chemoattractant protein-4 levels	0.00228557	9.27e-07	7.03e-06	0.00314072	30.9642	40.9189	22.5141
rs62201455	A	C	A	C	-0.2136	0.0707	0.9807	0.9806	Prostate cancer	20	12689462	0.0335	0.0350703	GCST90274824	20	12689462	0.0451	2.18e-06	Monocyte chemoattractant protein-4 levels	0.00152153	3.18e-05	0.000116247	0.00172713	25.4674	40.9189	22.431
rs62336911	T	C	T	C	0.1569	0.0556	0.0417	0.0393	Prostate cancer	4	176433708	0.0246	0.0238902	GCST90274824	4	176433708	0.0332	2.29e-06	Monocyte chemoattractant protein-4 levels	0.00156092	3.64e-05	0.000136909	0.00196749	28.163	40.9189	22.3342
rs72825017	T	G	T	G	-0.1997	-0.0196	0.0594	0.0566	Prostate cancer	17	32529710	0.0184	0.2871	GCST90274824	17	32529710	0.0251	1.77e-15	Monocyte chemoattractant protein-4 levels	0.00427959	8.09e-06	4.67e-13	0.00445633	65.9266	40.9189	63.3007
rs72832833	A	G	A	G	-0.0635	-0.013	0.7811	0.7905	Prostate cancer	10	117669867	0.0098	0.1845	GCST90274824	10	117669867	0.0143	8.97e-06	Monocyte chemoattractant protein-4 levels	0.0013367	1.25e-05	0.000136625	0.00137889	20.3419	40.9189	19.7186
rs74794857	T	C	T	C	0.0674	-0.0214	0.4123	0.4194	Prostate cancer	5	22143588	0.0096	0.0249597	GCST90274824	5	22143588	0.0139	1.24e-06	Monocyte chemoattractant protein-4 levels	0.00199567	3.54e-05	5.44e-05	0.0022015	25.9424	40.9189	23.512
rs7612912	T	C	T	C	0.1281	-0.0028	0.6276	0.6275	Prostate cancer	3	42910621	0.0084	0.7361	GCST90274824	3	42910621	0.012	1.33e-26	Monocyte chemoattractant protein-4 levels	0.00768622	7.92e-07	1.02e-23	0.00767045	113.72	40.9189	113.956
rs77609620	C	G	C	G	-0.1093	0.0067	0.0716	0.0728	Prostate cancer	19	18452787	0.0163	0.680201	GCST90274824	19	18452787	0.0243	6.86e-06	Monocyte chemoattractant protein-4 levels	0.00141417	1.2e-06	3.2e-05	0.00158825	22.7258	40.9189	20.2315
rs8112014	A	G	A	G	-0.0578	-0.0064	0.2923	0.2988	Prostate cancer	19	14773077	0.0093	0.4936	GCST90274824	19	14773077	0.0126	4.49e-06	Monocyte chemoattractant protein-4 levels	0.00142734	3.38e-06	3.31e-05	0.00138218	20.3766	40.9189	21.0433
rs847767	A	G	A	G	0.077	-0.001	0.8533	0.8681	Prostate cancer	6	40051588	0.0119	0.9343	GCST90274824	6	40051588	0.0168	4.58e-06	Monocyte chemoattractant protein-4 levels	0.00142401	5.03e-08	1.47e-05	0.00148437	21.8988	40.9189	21.0069
rs926646	T	C	T	C	0.1432	-0.0095	0.9545	0.9569	Prostate cancer	20	20023326	0.0218	0.6612	GCST90274824	20	20023326	0.0304	2.47e-06	Monocyte chemoattractant protein-4 levels	0.00150412	1.35e-06	1.39e-05	0.00178116	26.2833	40.9189	22.1891
rs113448118	A	G	A	G	0.0818	0.0091	0.1528	0.1559	Prostate cancer	7	1108954	0.0111	0.4124	GCST90274825	7	1108954	0.0179	4.88e-06	Macrophage inflammatory protein 1a levels	0.001768	4.79e-06	3.19e-05	0.00173239	20.4621	40.9189	20.8834
rs1143687	T	C	T	C	-0.1229	-0.0381	0.0627	0.0678	Prostate cancer	16	81922813	0.0165	0.0212501	GCST90274825	16	81922813	0.024	3.04e-07	Macrophage inflammatory protein 1a levels	0.00177575	3.8e-05	3.22e-05	0.00177533	26.2167	40.9189	26.2229
rs1295911	A	G	A	G	-0.087	0.0172	0.8805	0.8868	Prostate cancer	10	12075632	0.0128	0.1805	GCST90274825	10	12075632	0.0193	6.55e-06	Macrophage inflammatory protein 1a levels	0.00158536	1.29e-05	8.66e-05	0.00159282	20.4158	40.9189	20.32
rs147065959	A	C	A	C	0.302	-0.015	0.985	0.9883	Prostate cancer	15	28291907	0.0469	0.749601	GCST90274825	15	28291907	0.068	8.95e-06	Macrophage inflammatory protein 1a levels	0.00172176	7.29e-07	2.9e-05	0.00269508	30.9042	40.9189	19.724
rs2847249	T	C	T	C	-0.0621	0.0044	0.2605	0.254	Prostate cancer	18	12747235	0.0098	0.653699	GCST90274825	18	12747235	0.0136	4.97e-06	Macrophage inflammatory protein 1a levels	0.00145673	1.44e-06	2.53e-05	0.0014858	21.2666	40.9189	20.85
rs2853926	A	G	A	G	-0.0608	0.0277	0.7392	0.7426	Prostate cancer	6	31263051	0.0091	0.00241902	GCST90274825	6	31263051	0.0133	4.84e-06	Macrophage inflammatory protein 1a levels	0.00141567	6.61e-05	0.000652621	0.0014253	21.0404	40.9189	20.898
rs4861445	A	G	A	G	0.0588	-0.0037	0.3744	0.3869	Prostate cancer	4	181734829	0.01	0.7106	GCST90274825	4	181734829	0.013	6.09e-06	Macrophage inflammatory protein 1a levels	0.0014293	9.76e-07	2.73e-05	0.00161963	23.187	40.9189	20.4582
rs56675286	A	C	A	C	-0.1806	-0.0282	0.0383	0.0398	Prostate cancer	17	34358060	0.0254	0.2653	GCST90274825	17	34358060	0.0325	2.75e-08	Macrophage inflammatory protein 1a levels	0.00209042	8.79e-06	7.75e-07	0.00240272	35.5039	40.9189	30.8794
rs5743604	A	G	A	G	-0.0736	0.009	0.7503	0.7665	Prostate cancer	4	38801285	0.0097	0.3518	GCST90274825	4	38801285	0.0135	4.98e-08	Macrophage inflammatory protein 1a levels	0.00201309	6.14e-06	9.67e-07	0.00202973	29.969	40.9189	29.7227
rs66822987	T	C	T	C	0.0653	-0.003	0.2284	0.2254	Prostate cancer	3	63106417	0.0101	0.7659	GCST90274825	3	63106417	0.0144	5.77e-06	Macrophage inflammatory protein 1a levels	0.00143666	6.29e-07	2.35e-05	0.00150295	21.514	40.9189	20.5637
rs677925	T	C	T	C	-0.0668	-0.0098	0.7284	0.734	Prostate cancer	17	15741465	0.0095	0.2997	GCST90274825	17	15741465	0.0143	2.99e-06	Macrophage inflammatory protein 1a levels	0.00175542	7.59e-06	2.89e-05	0.00176556	21.9476	40.9189	21.8213
rs7137828	T	C	T	C	-0.0837	0.0192	0.5247	0.5179	Prostate cancer	12	111932800	0.0082	0.0187301	GCST90274825	12	111932800	0.0133	3.11e-10	Macrophage inflammatory protein 1a levels	0.00347972	3.91e-05	6.34e-08	0.0034943	39.7713	40.9189	39.6048
rs7537266	T	C	T	C	0.0615	-0.0092	0.2426	0.2513	Prostate cancer	1	238391155	0.01	0.3586	GCST90274825	1	238391155	0.0137	7.15e-06	Macrophage inflammatory protein 1a levels	0.001408	6.03e-06	6.45e-05	0.00138994	19.8927	40.9189	20.1516
rs76522981	T	C	T	C	-0.1462	-0.006	0.076	0.0952	Prostate cancer	17	34450780	0.0172	0.727699	GCST90274825	17	34450780	0.0253	7.53e-09	Macrophage inflammatory protein 1a levels	0.00233086	8.68e-07	6.79e-08	0.003002	43.0367	40.9189	33.3929
rs78871521	T	C	T	C	0.1812	-0.0235	0.0304	0.029	Prostate cancer	16	4774017	0.0246	0.3392	GCST90274825	16	4774017	0.0371	1.04e-06	Macrophage inflammatory protein 1a levels	0.00179791	6.51e-06	1.15e-05	0.00193559	25.6846	40.9189	23.8544
rs8951	T	C	T	C	-0.4102	-0.0266	0.7695	0.7819	Prostate cancer	17	34415720	0.0096	0.00578003	GCST90274825	17	34415720	0.0135	8.62e-203	Macrophage inflammatory protein 1a levels	0.0606759	5.47e-05	4.39e-170	0.0596899	907.305	40.9189	923.259
rs9540456	A	G	A	G	0.0926	-0.0002	0.8776	0.885	Prostate cancer	13	66085374	0.0134	0.9867	GCST90274825	13	66085374	0.0181	3.12e-07	Macrophage inflammatory protein 1a levels	0.00182788	1.59e-09	1.13e-06	0.00184217	26.3787	40.9189	26.1737
rs9911791	A	G	A	G	0.176	0.019	0.8208	0.7899	Prostate cancer	17	34820996	0.0117	0.1057	GCST90274825	17	34820996	0.0162	1.71e-27	Macrophage inflammatory protein 1a levels	0.00819031	1.88e-05	7.48e-23	0.00911236	131.441	40.9189	118.031
rs10732827	A	G	A	G	0.0558	0.0248	0.3498	0.3627	Prostate cancer	10	85891907	0.0084	0.00304502	GCST90274826	10	85891907	0.0124	6.8e-06	Matrix metalloproteinase-1 levels	0.00137193	6.21e-05	0.000754059	0.00141633	20.9063	40.9189	20.25
rs10978641	A	T	A	T	0.0649	0.0021	0.7462	0.7494	Prostate cancer	9	109554196	0.0097	0.828	GCST90274826	9	109554196	0.014	3.56e-06	Matrix metalloproteinase-1 levels	0.00150116	3.34e-07	1.37e-05	0.00159539	22.8409	40.9189	21.4898
rs10990535	T	C	T	C	0.0703	-0.0042	0.253	0.247	Prostate cancer	9	99091009	0.0096	0.660601	GCST90274826	9	99091009	0.0135	1.91e-07	Matrix metalloproteinase-1 levels	0.00183731	1.36e-06	1.46e-06	0.00186802	27.5712	40.9189	27.1171
rs116350236	A	T	A	T	0.0639	-0.0112	0.3845	0.3731	Prostate cancer	12	124668322	0.0086	0.1888	GCST90274826	12	124668322	0.0142	6.8e-06	Matrix metalloproteinase-1 levels	0.00188631	1.21e-05	6.64e-05	0.00193266	20.7486	40.9189	20.25
rs11673125	T	C	T	C	-0.0585	-0.0026	0.296	0.3017	Prostate cancer	19	14763748	0.0093	0.778099	GCST90274826	19	14763748	0.0127	4.1e-06	Matrix metalloproteinase-1 levels	0.00143751	5.57e-07	1.75e-05	0.00142628	21.052	40.9189	21.218
rs116889819	A	G	A	G	-0.176	-0.0216	0.0455	0.0413	Prostate cancer	11	102806398	0.0208	0.2982	GCST90274826	11	102806398	0.03	4.45e-09	Matrix metalloproteinase-1 levels	0.00232924	7.69e-06	1.46e-07	0.00269056	39.7712	40.9189	34.4178
rs12141791	A	G	A	G	0.0859	-0.0214	0.6981	0.7074	Prostate cancer	1	156419786	0.0089	0.0164502	GCST90274826	1	156419786	0.013	3.9e-11	Matrix metalloproteinase-1 levels	0.00304524	4.12e-05	2.7e-08	0.00311026	44.5968	40.9189	43.6616
rs12367368	T	G	T	G	0.0861	-0.0217	0.1146	0.1171	Prostate cancer	12	83594043	0.0131	0.0961302	GCST90274826	12	83594043	0.0186	3.67e-06	Matrix metalloproteinase-1 levels	0.00145142	1.96e-05	9.97e-05	0.00150439	22.2111	40.9189	21.4279
rs12380451	T	C	T	C	-0.0593	0.0103	0.7098	0.7054	Prostate cancer	9	9191014	0.0091	0.2594	GCST90274826	9	9191014	0.0133	8.25e-06	Matrix metalloproteinase-1 levels	0.00138883	9.13e-06	9.54e-05	0.00144868	20.7375	40.9189	19.8795
rs141782294	A	G	A	G	0.3767	0.0168	0.9777	0.9787	Prostate cancer	11	102354473	0.0308	0.5858	GCST90274826	11	102354473	0.0445	2.56e-17	Matrix metalloproteinase-1 levels	0.00484161	2.12e-06	3.33e-15	0.00618773	91.7066	40.9189	71.6591
rs148908824	A	G	A	G	-0.2306	-0.0196	0.0214	0.0154	Prostate cancer	12	24806965	0.0397	0.6216	GCST90274826	12	24806965	0.0517	8.18e-06	Matrix metalloproteinase-1 levels	0.00153593	1.74e-06	3.74e-05	0.00222724	28.8692	40.9189	19.8947
rs149819211	A	G	A	G	-0.1601	0.068	0.0417	0.0215	Prostate cancer	1	21336393	0.0272	0.0124701	GCST90274826	1	21336393	0.0351	5.08e-06	Matrix metalloproteinase-1 levels	0.00140929	4.46e-05	0.000361394	0.00204857	30.262	40.9189	20.805
rs188626385	T	C	T	C	-0.2509	0.0639	0.0177	0.0128	Prostate cancer	7	120591120	0.0438	0.1449	GCST90274826	7	120591120	0.053	2.2e-06	Matrix metalloproteinase-1 levels	0.00172981	1.52e-05	4.05e-05	0.00218901	28.3726	40.9189	22.4104
rs189173367	T	C	T	C	0.3179	0.0197	0.0131	0.0118	Prostate cancer	3	8761961	0.0544	0.7175	GCST90274826	3	8761961	0.0714	8.49e-06	Matrix metalloproteinase-1 levels	0.00165988	9.35e-07	3.02e-05	0.0026131	31.2376	40.9189	19.8237
rs2155053	T	C	T	C	-0.3212	-0.0236	0.9461	0.9461	Prostate cancer	11	102604607	0.0182	0.1956	GCST90274826	11	102604607	0.0264	4.68e-34	Matrix metalloproteinase-1 levels	0.00994341	1.2e-05	6.83e-29	0.0105222	156.736	40.9189	148.028
rs2229629	A	G	A	G	-0.3153	-0.0481	0.0135	0.018	Prostate cancer	2	75116527	0.038	0.2057	GCST90274826	2	75116527	0.0673	2.8e-06	Matrix metalloproteinase-1 levels	0.0020124	1.14e-05	3.02e-05	0.00264794	28.8994	40.9189	21.9492
rs2926741	T	C	T	C	-0.0704	0.0209	0.3436	0.3617	Prostate cancer	12	57098597	0.0083	0.01153	GCST90274826	12	57098597	0.0126	2.31e-08	Matrix metalloproteinase-1 levels	0.00217923	4.52e-05	5.24e-06	0.00223561	32.0275	40.9189	31.2179
rs4734879	A	G	A	G	0.1136	-0.0132	0.7422	0.7351	Prostate cancer	8	106583124	0.0094	0.1571	GCST90274826	8	106583124	0.0137	1.11e-16	Matrix metalloproteinase-1 levels	0.00478716	1.41e-05	8.29e-14	0.00493845	70.9405	40.9189	68.7568
rs7219205	A	G	A	G	0.0569	-0.0071	0.5023	0.4948	Prostate cancer	17	4351312	0.0088	0.4207	GCST90274826	17	4351312	0.0121	2.57e-06	Matrix metalloproteinase-1 levels	0.00154465	4.64e-06	2.31e-05	0.00161877	23.1762	40.9189	22.1133
rs72777396	A	G	A	G	0.1657	-0.0478	0.9671	0.9758	Prostate cancer	2	10923106	0.0287	0.0952599	GCST90274826	2	10923106	0.0364	5.31e-06	Matrix metalloproteinase-1 levels	0.00140371	1.98e-05	0.000135895	0.0017472	25.8023	40.9189	20.7225
rs77095316	T	G	T	G	-0.1416	0.0523	0.0705	0.0644	Prostate cancer	11	102572180	0.0167	0.00169001	GCST90274826	11	102572180	0.0238	2.69e-09	Matrix metalloproteinase-1 levels	0.00239538	6.99e-05	2.71e-06	0.00262782	38.8413	40.9189	35.3975
rs873675	T	C	T	C	0.1234	-0.0012	0.0684	0.0666	Prostate cancer	3	64991445	0.0166	0.9426	GCST90274826	3	64991445	0.0234	1.34e-07	Matrix metalloproteinase-1 levels	0.00188314	3.73e-08	5.96e-07	0.00194064	28.6607	40.9189	27.8098
rs9524612	T	C	T	C	-0.072	0.0083	0.177	0.1685	Prostate cancer	13	95429892	0.0118	0.4824	GCST90274826	13	95429892	0.0162	8.81e-06	Matrix metalloproteinase-1 levels	0.00138001	3.53e-06	5.85e-05	0.00151032	21.6211	40.9189	19.7531
rs10971521	A	G	A	G	-0.0585	0.0137	0.2739	0.2672	Prostate cancer	9	33470408	0.0095	0.1493	GCST90274827	9	33470408	0.0132	9.34e-06	Matrix metalloproteinase-10 levels	0.00133226	1.48e-05	0.000162918	0.00136123	20.0686	40.9189	19.641
rs112062276	T	G	T	G	0.1203	0.0128	0.0601	0.0679	Prostate cancer	6	134160498	0.0172	0.4561	GCST90274827	6	134160498	0.0249	1.36e-06	Matrix metalloproteinase-10 levels	0.00158202	3.95e-06	1.27e-05	0.001635	24.1246	40.9189	23.3417
rs11225354	T	C	T	C	0.2957	-0.0222	0.879	0.8794	Prostate cancer	11	102510046	0.0126	0.0766902	GCST90274827	11	102510046	0.0181	5.38e-60	Matrix metalloproteinase-10 levels	0.0183298	2.21e-05	1.01e-50	0.0185997	270.903	40.9189	266.898
rs112327130	C	G	C	G	-0.2862	0.0311	0.0153	0.0097	Prostate cancer	8	77953661	0.0497	0.5313	GCST90274827	8	77953661	0.0608	2.51e-06	Matrix metalloproteinase-10 levels	0.00177603	2.79e-06	1.48e-05	0.00246811	30.8139	40.9189	22.1581
rs112966738	T	C	T	C	0.2201	0.0093	0.9801	0.9844	Prostate cancer	9	81249363	0.0395	0.8136	GCST90274827	9	81249363	0.0486	5.93e-06	Matrix metalloproteinase-10 levels	0.00143282	3.95e-07	2.22e-05	0.0018897	27.0626	40.9189	20.5101
rs113958571	A	G	A	G	-0.2315	0.0262	0.0188	0.0155	Prostate cancer	20	20711695	0.0357	0.4634	GCST90274827	20	20711695	0.0503	4.18e-06	Matrix metalloproteinase-10 levels	0.00147968	3.84e-06	3.18e-05	0.00197718	28.3179	40.9189	21.182
rs11771706	A	C	A	C	0.2157	0.0262	0.9813	0.9853	Prostate cancer	7	13720685	0.0366	0.4735	GCST90274827	7	13720685	0.0482	7.64e-06	Matrix metalloproteinase-10 levels	0.00135663	3.65e-06	5.46e-05	0.00170755	25.2158	40.9189	20.0266
rs12567824	A	C	A	C	0.07	-0.0201	0.822	0.8229	Prostate cancer	1	159990022	0.0109	0.0650894	GCST90274827	1	159990022	0.0153	4.76e-06	Matrix metalloproteinase-10 levels	0.00146226	2.42e-05	0.000146779	0.0014339	20.5256	40.9189	20.9321
rs1356799	T	G	T	G	-0.069	0.0106	0.7974	0.7959	Prostate cancer	2	140567666	0.0102	0.3023	GCST90274827	2	140567666	0.015	4.22e-06	Matrix metalloproteinase-10 levels	0.0015236	7.7e-06	4.6e-05	0.00153831	21.3646	40.9189	21.16
rs138847931	T	C	T	C	-0.3484	0.0204	0.9866	0.9907	Prostate cancer	6	167150835	0.0574	0.7218	GCST90274827	6	167150835	0.0769	5.88e-06	Matrix metalloproteinase-10 levels	0.00179148	9.01e-07	2.07e-05	0.00320946	36.8248	40.9189	20.526
rs139747874	T	C	T	C	-0.2523	-0.0341	0.9867	0.9886	Prostate cancer	20	37234290	0.041	0.4056	GCST90274827	20	37234290	0.0567	8.6e-06	Matrix metalloproteinase-10 levels	0.00147325	4.93e-06	6.23e-05	0.00167071	22.4585	40.9189	19.8001
rs142915220	A	G	A	G	-0.3256	-0.0505	0.9794	0.9843	Prostate cancer	11	102881952	0.0346	0.1449	GCST90274827	11	102881952	0.0494	4.37e-11	Matrix metalloproteinase-10 levels	0.00313654	1.52e-05	4.96e-09	0.00427785	59.3181	40.9189	43.4425
rs17099622	A	G	A	G	-0.2064	-0.0255	0.9296	0.9294	Prostate cancer	11	102700352	0.0161	0.1136	GCST90274827	11	102700352	0.0233	8.12e-19	Matrix metalloproteinase-10 levels	0.00545979	1.79e-05	1.88e-15	0.00557594	80.1494	40.9189	78.4707
rs17860955	T	C	T	C	1.1371	-0.0263	0.983	0.9831	Prostate cancer	11	102649482	0.0326	0.4195	GCST90274827	11	102649482	0.047	2.6e-129	Matrix metalloproteinase-10 levels	0.0394446	4.64e-06	1.4e-113	0.0432145	643.801	40.9189	585.331
rs192820441	A	G	A	G	0.2701	-0.019	0.9874	0.9863	Prostate cancer	12	117560675	0.0388	0.6241	GCST90274827	12	117560675	0.0603	7.49e-06	Matrix metalloproteinase-10 levels	0.00149596	1.71e-06	3.57e-05	0.00181528	24.3544	40.9189	20.0639
rs34387740	A	G	A	G	0.0845	0.0079	0.1751	0.1735	Prostate cancer	9	136375396	0.0116	0.4955	GCST90274827	9	136375396	0.019	8.69e-06	Matrix metalloproteinase-10 levels	0.00174069	3.31e-06	4.31e-05	0.00206267	23.4453	40.9189	19.7791
rs3742926	T	C	T	C	-0.0912	-0.0038	0.0978	0.0984	Prostate cancer	14	33014869	0.0137	0.779701	GCST90274827	14	33014869	0.0196	3.27e-06	Matrix metalloproteinase-10 levels	0.00146651	5.49e-07	1.43e-05	0.00146778	21.6698	40.9189	21.651
rs41285646	A	G	A	G	0.106	0.0265	0.2799	0.1955	Prostate cancer	6	32551603	0.0128	0.0381101	GCST90274827	6	32551603	0.0208	3.47e-07	Matrix metalloproteinase-10 levels	0.00288501	3.06e-05	9.42e-06	0.00452937	40.8406	40.9189	25.9708
rs539147801	A	C	A	C	-0.2059	-0.0253	0.9719	0.9752	Prostate cancer	10	13585421	0.0281	0.3679	GCST90274827	10	13585421	0.0444	3.53e-06	Matrix metalloproteinase-10 levels	0.001895	5.78e-06	2.52e-05	0.00231564	26.2901	40.9189	21.5054
rs55804377	A	G	A	G	-0.2185	0.0118	0.0185	0.0186	Prostate cancer	10	1063892	0.0313	0.705601	GCST90274827	10	1063892	0.0469	3.18e-06	Matrix metalloproteinase-10 levels	0.00147045	1.01e-06	1.6e-05	0.00173378	25.5986	40.9189	21.7049
rs72699188	C	G	C	G	-0.0931	0.0106	0.8507	0.839	Prostate cancer	9	6176871	0.0111	0.3379	GCST90274827	9	6176871	0.0166	2.04e-08	Matrix metalloproteinase-10 levels	0.00212912	6.5e-06	4.69e-07	0.00220174	32.5296	40.9189	31.4545
rs7683424	A	G	A	G	0.054	0.0102	0.4046	0.4049	Prostate cancer	4	187115945	0.0085	0.2288	GCST90274827	4	187115945	0.0121	8.09e-06	Matrix metalloproteinase-10 levels	0.00139142	1.03e-05	0.000102177	0.00140492	20.1102	40.9189	19.9167
rs7966257	C	G	C	G	-0.0819	0.03	0.1335	0.1287	Prostate cancer	12	111251437	0.0124	0.0154899	GCST90274827	12	111251437	0.0178	4.2e-06	Matrix metalloproteinase-10 levels	0.00147898	4.17e-05	0.000266098	0.00155184	22.215	40.9189	21.1703
rs10412462	A	C	A	C	-0.1731	0.0152	0.0363	0.0337	Prostate cancer	19	14691684	0.0256	0.5525	GCST90274828	19	14691684	0.0366	2.25e-06	Neurturin levels	0.00189395	2.51e-06	1.21e-05	0.00209639	24.7642	40.9189	22.3682
rs113580784	A	G	A	G	-0.2288	-0.0253	0.0208	0.0238	Prostate cancer	20	55469957	0.0311	0.4154	GCST90274828	20	55469957	0.0495	3.8e-06	Neurturin levels	0.00181253	4.72e-06	2.53e-05	0.00213244	25.1439	40.9189	21.3649
rs117216753	T	C	T	C	0.2114	-0.0302	0.0291	0.031	Prostate cancer	15	28183982	0.0339	0.3738	GCST90274828	15	28183982	0.0475	8.57e-06	Neurturin levels	0.00211687	5.66e-06	4.41e-05	0.00252527	23.6381	40.9189	19.8072
rs11766761	T	C	T	C	0.0729	-0.0113	0.8184	0.8334	Prostate cancer	7	41670710	0.0108	0.2965	GCST90274828	7	41670710	0.0165	9.95e-06	Neurturin levels	0.00165419	7.81e-06	7.78e-05	0.00157967	18.6395	40.9189	19.5203
rs140212763	T	G	T	G	-0.1599	0.0589	0.9347	0.9643	Prostate cancer	13	19290907	0.0302	0.0512495	GCST90274828	13	19290907	0.0358	7.95e-06	Neurturin levels	0.00226674	2.71e-05	0.000114485	0.00312113	27.4925	40.9189	19.9494
rs143131035	T	C	T	C	-0.4361	-0.008	0.0118	0.0097	Prostate cancer	4	43313220	0.0472	0.8648	GCST90274828	4	43313220	0.0867	4.91e-07	Neurturin levels	0.00332542	2.05e-07	1.19e-06	0.00443536	33.7832	40.9189	25.3008
rs148658700	A	T	A	T	-0.3205	-0.0531	0.0145	0.0132	Prostate cancer	9	138510992	0.0452	0.2402	GCST90274828	9	138510992	0.0713	6.95e-06	Neurturin levels	0.00177849	9.84e-06	6.31e-05	0.00293569	33.3917	40.9189	20.2058
rs182274799	A	G	A	G	0.1565	-0.0341	0.0646	0.0689	Prostate cancer	11	10358788	0.0162	0.0355902	GCST90274828	11	10358788	0.031	4.46e-07	Neurturin levels	0.00268715	3.16e-05	1.33e-05	0.00295998	28.0816	40.9189	25.4862
rs192427410	T	G	T	G	0.3743	0.0115	0.0252	0.0067	Prostate cancer	8	43185781	0.0613	0.8515	GCST90274828	8	43185781	0.0786	1.92e-06	Neurturin levels	0.00257591	2.51e-07	4.83e-06	0.00688313	60.8596	40.9189	22.6775
rs29630	T	C	T	C	-0.074	0.0031	0.2493	0.2526	Prostate cancer	5	171026588	0.0097	0.750699	GCST90274828	5	171026588	0.0159	3.25e-06	Neurturin levels	0.00190629	7.28e-07	1.15e-05	0.00204966	23.293	40.9189	21.6605
rs4360502	A	G	A	G	-0.0652	0.0043	0.3445	0.3521	Prostate cancer	1	214886642	0.0088	0.6282	GCST90274828	1	214886642	0.0141	3.76e-06	Neurturin levels	0.00188203	1.7e-06	1.61e-05	0.00191994	21.814	40.9189	21.3824
rs4723879	A	G	A	G	-0.0722	0.0017	0.2241	0.233	Prostate cancer	7	4596494	0.01	0.8626	GCST90274828	7	4596494	0.0163	9.45e-06	Neurturin levels	0.00172702	2.06e-07	2.52e-05	0.00181281	20.5964	40.9189	19.62
rs48221	T	C	T	C	-0.0596	0.0094	0.3995	0.4151	Prostate cancer	3	8648067	0.009	0.3001	GCST90274828	3	8648067	0.0134	8.68e-06	Neurturin levels	0.00167624	7.78e-06	6.9e-05	0.00170433	20.1146	40.9189	19.7826
rs61589891	A	G	A	G	-0.1563	-0.0223	0.0545	0.059	Prostate cancer	6	73859555	0.019	0.2389	GCST90274828	6	73859555	0.0348	7.08e-06	Neurturin levels	0.00223167	9.82e-06	4.84e-05	0.00251771	22.7646	40.9189	20.1725
rs62120726	A	G	A	G	0.0786	-0.0008	0.8077	0.8171	Prostate cancer	2	15734798	0.0105	0.9362	GCST90274828	2	15734798	0.0172	4.88e-06	Neurturin levels	0.00183797	4.14e-08	1.22e-05	0.00191913	21.8067	40.9189	20.8828
rs75066660	A	G	A	G	0.2148	0.0227	0.0197	0.0182	Prostate cancer	5	92157390	0.0315	0.4721	GCST90274828	5	92157390	0.0476	6.4e-06	Neurturin levels	0.00172465	3.7e-06	3.59e-05	0.00178207	21.0427	40.9189	20.3636
rs76777800	T	C	T	C	0.3387	0.0222	0.0176	0.0108	Prostate cancer	3	73067086	0.0502	0.6582	GCST90274828	3	73067086	0.0738	4.44e-06	Neurturin levels	0.00302625	1.39e-06	1.18e-05	0.00396699	27.6366	40.9189	21.0629
rs76807861	A	G	A	G	-0.2154	0.0172	0.023	0.023	Prostate cancer	6	153460965	0.0291	0.5541	GCST90274828	6	153460965	0.0486	9.33e-06	Neurturin levels	0.00179908	2.49e-06	3.97e-05	0.00208518	22.7739	40.9189	19.6435
rs7712604	C	G	C	G	-0.0879	-0.0062	0.6738	0.6901	Prostate cancer	5	21508959	0.0098	0.5278	GCST90274828	5	21508959	0.0176	5.9e-07	Neurturin levels	0.00289702	2.85e-06	2.68e-06	0.00339643	29.2577	40.9189	24.9432
rs77216559	T	C	T	C	0.1667	0.0297	0.958	0.9683	Prostate cancer	11	4475910	0.0271	0.2724	GCST90274828	11	4475910	0.034	9.44e-07	Neurturin levels	0.00203494	8.56e-06	1.07e-05	0.00223623	26.422	40.9189	24.0388
rs8030121	A	G	A	G	0.0601	0.001	0.4519	0.4695	Prostate cancer	15	51931074	0.008	0.9046	GCST90274828	15	51931074	0.0136	9.91e-06	Neurturin levels	0.00171899	1.11e-07	2.5e-05	0.00178929	20.3287	40.9189	19.5286
rs8033310	T	C	T	C	0.1332	-0.0061	0.9133	0.9085	Prostate cancer	15	24046105	0.0188	0.7438	GCST90274828	15	24046105	0.0286	3.2e-06	Neurturin levels	0.00190895	7.51e-07	1.14e-05	0.00280977	31.9554	40.9189	21.6908
rs908372	C	G	C	G	-0.0622	-0.008	0.3324	0.3389	Prostate cancer	2	172434373	0.0086	0.3533	GCST90274828	2	172434373	0.0136	4.8e-06	Neurturin levels	0.00177386	6.17e-06	3.59e-05	0.00171707	20.2464	40.9189	20.9172
rs1009409	T	G	T	G	0.0552	0.0016	0.3857	0.3846	Prostate cancer	13	69789253	0.0083	0.8502	GCST90274829	13	69789253	0.0121	5.07e-06	Neurotrophin-3 levels	0.00145396	2.65e-07	1.82e-05	0.0014439	20.6676	40.9189	20.8117
rs1017982	A	G	A	G	0.0623	-0.0089	0.2606	0.275	Prostate cancer	1	238095957	0.0102	0.3813	GCST90274829	1	238095957	0.014	8.59e-06	Neurotrophin-3 levels	0.00138346	5.43e-06	7.1e-05	0.00149575	21.4123	40.9189	19.8025
rs10780690	T	G	T	G	0.0557	-0.004	0.5265	0.5213	Prostate cancer	9	87478172	0.0082	0.629901	GCST90274829	9	87478172	0.012	3.46e-06	Neurotrophin-3 levels	0.00150501	1.7e-06	1.94e-05	0.00154689	22.1455	40.9189	21.5451
rs11225042	A	C	A	C	-0.0973	0.0047	0.8737	0.8918	Prostate cancer	11	101727684	0.0141	0.736801	GCST90274829	11	101727684	0.0203	1.64e-06	Neurotrophin-3 levels	0.00184782	7.92e-07	6.87e-06	0.0020894	25.9837	40.9189	22.9738
rs112418830	T	C	T	C	0.1366	-0.0181	0.0567	0.0594	Prostate cancer	6	151293888	0.0192	0.3446	GCST90274829	6	151293888	0.0263	2.06e-07	Neurotrophin-3 levels	0.00188372	6.34e-06	3.17e-06	0.00199602	28.5881	40.9189	26.9768
rs113313831	T	C	T	C	-0.0827	0.0087	0.1667	0.164	Prostate cancer	5	130427791	0.0121	0.4695	GCST90274829	5	130427791	0.0187	9.76e-06	Neurotrophin-3 levels	0.00157352	3.69e-06	5.52e-05	0.00190011	23.6252	40.9189	19.5582
rs116906009	T	C	T	C	-0.1839	0.0342	0.9745	0.9804	Prostate cancer	12	118360925	0.0309	0.2685	GCST90274829	12	118360925	0.041	7.28e-06	Neurotrophin-3 levels	0.00136442	8.73e-06	8.68e-05	0.0016808	24.7914	40.9189	20.1185
rs11756802	A	T	A	T	-0.1414	-0.0052	0.0444	0.0353	Prostate cancer	6	7170084	0.0248	0.8351	GCST90274829	6	7170084	0.0319	9.31e-06	Neurotrophin-3 levels	0.00137267	3.13e-07	3.21e-05	0.00169663	24.2929	40.9189	19.648
rs12517801	A	G	A	G	-0.0555	-0.0077	0.3609	0.3597	Prostate cancer	5	1731054	0.0086	0.3739	GCST90274829	5	1731054	0.0121	4.5e-06	Neurotrophin-3 levels	0.00142682	5.72e-06	4.38e-05	0.00142093	20.9515	40.9189	21.0385
rs146532158	T	C	T	C	-0.1859	-0.0168	0.0249	0.0217	Prostate cancer	10	115833862	0.0298	0.573	GCST90274829	10	115833862	0.0386	1.46e-06	Neurotrophin-3 levels	0.00157121	2.27e-06	1.05e-05	0.00167818	24.7762	40.9189	23.1945
rs17537796	A	C	A	C	-0.2571	-0.0215	0.9866	0.9838	Prostate cancer	7	40026172	0.0356	0.5472	GCST90274829	7	40026172	0.0553	3.33e-06	Neurotrophin-3 levels	0.00151433	2.6e-06	2.19e-05	0.00174775	24.9526	40.9189	21.6149
rs188129302	T	C	T	C	-0.2607	-0.0328	0.018	0.0125	Prostate cancer	5	146781995	0.0426	0.441199	GCST90274829	5	146781995	0.0577	6.24e-06	Neurotrophin-3 levels	0.00164227	4.23e-06	3.96e-05	0.00240268	29.8891	40.9189	20.4141
rs2034246	A	C	A	C	0.0582	0	0.5677	0.5641	Prostate cancer	5	114451587	0.0089	0.9982	GCST90274829	5	114451587	0.012	1.23e-06	Neurotrophin-3 levels	0.00164292	0	3.86e-06	0.00166257	23.8044	40.9189	23.5225
rs2107473	A	G	A	G	-0.2393	0.0769	0.0175	0.0169	Prostate cancer	7	8762956	0.0392	0.0495199	GCST90274829	7	8762956	0.0507	2.36e-06	Neurotrophin-3 levels	0.00166074	2.74e-05	8.53e-05	0.00196918	26.4233	40.9189	22.2777
rs255889	A	G	A	G	-0.0937	0.0034	0.9203	0.9233	Prostate cancer	5	111111113	0.0153	0.8263	GCST90274829	5	111111113	0.0212	9.88e-06	Neurotrophin-3 levels	0.00132452	3.52e-07	3.55e-05	0.00128794	18.9946	40.9189	19.5347
rs2846299	A	G	A	G	0.0582	-0.0035	0.3022	0.3025	Prostate cancer	11	123375056	0.0091	0.704301	GCST90274829	11	123375056	0.0125	3.22e-06	Neurotrophin-3 levels	0.00147065	1.05e-06	1.64e-05	0.00142857	21.0572	40.9189	21.6783
rs28735437	C	G	C	G	-0.1168	0.021	0.1435	0.1407	Prostate cancer	15	88514855	0.0116	0.0707099	GCST90274829	15	88514855	0.0164	1.06e-12	Neurotrophin-3 levels	0.00343048	2.34e-05	5.21e-10	0.00335347	49.5797	40.9189	50.7222
rs3218587	A	G	A	G	0.1364	0.0082	0.0429	0.0417	Prostate cancer	6	111688927	0.0203	0.685001	GCST90274829	6	111688927	0.0294	3.49e-06	Neurotrophin-3 levels	0.00145795	1.16e-06	1.81e-05	0.00152782	22.5576	40.9189	21.5245
rs540074689	A	C	A	C	-0.1076	-0.0084	0.8004	0.7972	Prostate cancer	14	19356757	0.0177	0.634	GCST90274829	14	19356757	0.0219	8.96e-07	Neurotrophin-3 levels	0.00225078	1.61e-06	4.07e-06	0.00369932	39.7334	40.9189	24.1399
rs5751454	T	C	T	C	0.1823	-0.0274	0.0287	0.0248	Prostate cancer	22	43649715	0.0288	0.3406	GCST90274829	22	43649715	0.0398	4.64e-06	Neurotrophin-3 levels	0.00153151	6.45e-06	4.36e-05	0.00185284	25.3902	40.9189	20.9801
rs58399805	A	T	A	T	0.1106	0.0177	0.0799	0.0778	Prostate cancer	12	5680104	0.0165	0.2827	GCST90274829	12	5680104	0.022	4.98e-07	Neurotrophin-3 levels	0.00171226	8.2e-06	8.58e-06	0.00179855	26.5494	40.9189	25.2735
rs7250584	T	C	T	C	-0.117	0.0005	0.0529	0.0532	Prostate cancer	19	8335689	0.0188	0.9787	GCST90274829	19	8335689	0.026	6.8e-06	Neurotrophin-3 levels	0.00137184	5.04e-09	1.94e-05	0.00137168	20.2477	40.9189	20.25
rs72652073	C	G	C	G	0.058	0.003	0.3811	0.372	Prostate cancer	8	72031901	0.0092	0.740099	GCST90274829	8	72031901	0.0125	3.48e-06	Neurotrophin-3 levels	0.00150393	7.58e-07	1.56e-05	0.00158688	22.719	40.9189	21.5296
rs73166403	T	C	T	C	-0.092	0.011	0.1114	0.1192	Prostate cancer	7	152298228	0.0141	0.4376	GCST90274829	7	152298228	0.02	4.22e-06	Neurotrophin-3 levels	0.00147815	4.34e-06	3.42e-05	0.0016757	23.9927	40.9189	21.16
rs77065501	T	C	T	C	0.326	-0.0509	0.0135	0.0112	Prostate cancer	8	143406020	0.0505	0.3139	GCST90274829	8	143406020	0.0721	6.14e-06	Neurotrophin-3 levels	0.0018978	7.24e-06	4.37e-05	0.00283071	30.5222	40.9189	20.4439
rs79759094	A	G	A	G	-0.1163	-0.0138	0.0638	0.0573	Prostate cancer	4	7533099	0.0192	0.4725	GCST90274829	4	7533099	0.0251	3.6e-06	Neurotrophin-3 levels	0.00145578	3.68e-06	2.85e-05	0.00161577	23.8323	40.9189	21.469
rs871910	T	C	T	C	-0.0632	0.0072	0.2256	0.2172	Prostate cancer	10	7026672	0.0101	0.4788	GCST90274829	10	7026672	0.0141	7.39e-06	Neurotrophin-3 levels	0.00140356	3.62e-06	5.08e-05	0.00139562	19.9769	40.9189	20.0907
rs10142466	A	G	A	G	0.057	-0.0123	0.49	0.4922	Prostate cancer	14	69271784	0.0081	0.1288	GCST90274830	14	69271784	0.0109	1.7e-07	Osteoprotegerin levels	0.00185444	1.64e-05	6.63e-06	0.00162385	23.9403	40.9189	27.3462
rs114165349	C	G	C	G	-0.1948	-0.0242	0.0337	0.0247	Prostate cancer	1	27021913	0.0277	0.3823	GCST90274830	1	27021913	0.034	1.01e-08	Osteoprotegerin levels	0.00222432	5.44e-06	2.23e-07	0.00247144	36.4821	40.9189	32.8262
rs114805200	C	G	C	G	-0.2032	0.0267	0.9827	0.984	Prostate cancer	2	155956833	0.0335	0.4248	GCST90274830	2	155956833	0.0455	7.97e-06	Osteoprotegerin levels	0.00139444	4.53e-06	6.04e-05	0.00140393	20.0805	40.9189	19.9446
rs1230164	C	G	C	G	-0.0671	0.0112	0.7288	0.7232	Prostate cancer	4	99986023	0.0091	0.2178	GCST90274830	4	99986023	0.0129	1.98e-07	Osteoprotegerin levels	0.00189071	1.08e-05	4.66e-06	0.00177981	25.4663	40.9189	27.0561
rs12637074	T	C	T	C	-0.0712	0.0078	0.8414	0.8609	Prostate cancer	3	32324460	0.0118	0.5069	GCST90274830	3	32324460	0.0158	6.6e-06	Osteoprotegerin levels	0.00137896	3.12e-06	4.46e-05	0.00135299	19.9241	40.9189	20.307
rs138408096	A	G	A	G	-0.2007	0.023	0.0206	0.0184	Prostate cancer	15	84250648	0.032	0.4719	GCST90274830	15	84250648	0.0423	2.09e-06	Osteoprotegerin levels	0.00152712	3.68e-06	1.78e-05	0.00162537	23.9628	40.9189	22.512
rs138557324	T	C	T	C	-0.2253	-0.0117	0.0196	0.0232	Prostate cancer	12	119984130	0.0329	0.7208	GCST90274830	12	119984130	0.0473	1.91e-06	Osteoprotegerin levels	0.00158596	9.02e-07	9.5e-06	0.0019508	27.9177	40.9189	22.6882
rs1437633	A	C	A	C	-0.079	0.029	0.2072	0.2013	Prostate cancer	11	16272199	0.0104	0.00550098	GCST90274830	11	16272199	0.0147	7.69e-08	Osteoprotegerin levels	0.00224272	5.54e-05	1.47e-05	0.00205039	26.3997	40.9189	28.8815
rs144471361	T	C	T	C	0.3067	0.0712	0.0154	0.0079	Prostate cancer	6	134519823	0.0588	0.226	GCST90274830	6	134519823	0.0628	1.04e-06	Osteoprotegerin levels	0.00196033	1.05e-05	1.41e-05	0.00285258	34.738	40.9189	23.8511
rs17600346	T	C	T	C	-0.1569	-0.0182	0.9631	0.958	Prostate cancer	3	172223982	0.02	0.3646	GCST90274830	3	172223982	0.0299	1.54e-07	Osteoprotegerin levels	0.00186704	5.9e-06	2.48e-06	0.00174974	25.8031	40.9189	27.5362
rs192337992	A	G	A	G	-0.1555	-0.0456	0.962	0.9626	Prostate cancer	6	130506773	0.0219	0.0374602	GCST90274830	6	130506773	0.0334	3.23e-06	Osteoprotegerin levels	0.00180664	3.09e-05	0.000103054	0.00176787	21.2095	40.9189	21.6754
rs2247769	T	C	T	C	-0.1705	0.0087	0.5577	0.5447	Prostate cancer	8	120081031	0.008	0.2758	GCST90274830	8	120081031	0.0114	1.42e-50	Osteoprotegerin levels	0.0154195	8.43e-06	8.35e-44	0.0143416	207.821	40.9189	223.686
rs271665	T	C	T	C	-0.0672	0.0015	0.748	0.765	Prostate cancer	17	47938521	0.0095	0.8748	GCST90274830	17	47938521	0.0129	1.9e-07	Osteoprotegerin levels	0.00184164	1.78e-07	9.31e-07	0.00170244	25.0821	40.9189	27.1368
rs376613127	A	G	A	G	-0.2692	0.0445	0.0133	0.0147	Prostate cancer	12	71789031	0.0372	0.2315	GCST90274830	12	71789031	0.0568	2.14e-06	Osteoprotegerin levels	0.00170499	1.02e-05	2.91e-05	0.00190203	25.0631	40.9189	22.4623
rs61968587	A	G	A	G	-0.2671	0.0108	0.9843	0.9906	Prostate cancer	13	109537182	0.0468	0.8172	GCST90274830	13	109537182	0.0567	2.47e-06	Osteoprotegerin levels	0.00160594	3.8e-07	9.67e-06	0.00220498	30.4871	40.9189	22.1912
rs6506157	A	G	A	G	0.0642	0.0033	0.7937	0.8044	Prostate cancer	18	4040656	0.0134	0.8025	GCST90274830	18	4040656	0.0144	8.26e-06	Osteoprotegerin levels	0.0013897	4.32e-07	3.03e-05	0.00134976	19.3046	40.9189	19.8767
rs6985207	A	C	A	C	0.0522	0.0131	0.5556	0.5482	Prostate cancer	8	8604423	0.0082	0.109	GCST90274830	8	8604423	0.0114	4.67e-06	Osteoprotegerin levels	0.0014658	1.82e-05	0.000106477	0.00134557	19.2447	40.9189	20.9668
rs704	A	G	A	G	-0.1404	-0.0038	0.4726	0.4677	Prostate cancer	17	26694861	0.008	0.6343	GCST90274830	17	26694861	0.0111	1.14e-36	Osteoprotegerin levels	0.010744	1.61e-06	1.82e-32	0.00982648	146.19	40.9189	159.988
rs74111611	T	C	T	C	-0.1471	-0.0248	0.9603	0.9655	Prostate cancer	12	85607051	0.0222	0.2636	GCST90274830	12	85607051	0.0298	7.96e-07	Osteoprotegerin levels	0.00165148	8.9e-06	1.36e-05	0.00164988	24.3429	40.9189	24.3665
rs74627924	A	G	A	G	-0.0827	0.002	0.8883	0.8833	Prostate cancer	2	145820726	0.0133	0.8809	GCST90274830	2	145820726	0.0183	6.21e-06	Osteoprotegerin levels	0.0013866	1.61e-07	2.12e-05	0.00135723	19.9893	40.9189	20.4225
rs75064915	A	T	A	T	-0.1311	0.0087	0.0452	0.0448	Prostate cancer	2	223274212	0.0199	0.661899	GCST90274830	2	223274212	0.0295	8.83e-06	Osteoprotegerin levels	0.00133917	1.36e-06	4.28e-05	0.0014835	21.8814	40.9189	19.7497
rs7703177	T	C	T	C	0.053	0.0004	0.5883	0.5932	Prostate cancer	5	52799456	0.0084	0.9581	GCST90274830	5	52799456	0.0117	5.9e-06	Osteoprotegerin levels	0.00143462	1.62e-08	1.71e-05	0.0013607	19.4613	40.9189	20.5201
rs77507094	A	G	A	G	0.1965	-0.0176	0.9791	0.9806	Prostate cancer	10	55029035	0.0307	0.5662	GCST90274830	10	55029035	0.0429	4.64e-06	Osteoprotegerin levels	0.00142287	2.34e-06	2.92e-05	0.00158026	23.3046	40.9189	20.9802
rs928835	A	T	A	T	0.1047	0.0064	0.934	0.937	Prostate cancer	21	21116259	0.0175	0.7166	GCST90274830	21	21116259	0.0237	9.97e-06	Osteoprotegerin levels	0.00132453	9.54e-07	4.33e-05	0.00135149	19.9142	40.9189	19.5163
rs9946923	T	C	T	C	0.172	0.0315	0.9707	0.9715	Prostate cancer	18	76523646	0.0242	0.1924	GCST90274830	18	76523646	0.0376	4.77e-06	Osteoprotegerin levels	0.00157943	1.21e-05	6.62e-05	0.00168283	22.298	40.9189	20.9258
rs111827930	A	G	A	G	-0.061	0.0114	0.2479	0.2534	Prostate cancer	13	51453936	0.0094	0.2221	GCST90274831	13	51453936	0.0138	9.86e-06	Oncostatin-M levels	0.00136583	1.05e-05	0.000122431	0.00138753	19.8498	40.9189	19.539
rs114931601	A	G	A	G	0.1125	-0.0202	0.9343	0.9397	Prostate cancer	3	26561369	0.0182	0.2678	GCST90274831	3	26561369	0.0254	9.46e-06	Oncostatin-M levels	0.0013713	8.78e-06	0.000104069	0.00155377	22.2317	40.9189	19.6172
rs117867445	C	G	C	G	0.2926	0.0294	0.0172	0.0124	Prostate cancer	9	137876508	0.0396	0.4581	GCST90274831	9	137876508	0.0621	2.46e-06	Oncostatin-M levels	0.00211612	3.93e-06	1.38e-05	0.00289449	30.3904	40.9189	22.2006
rs200034863	A	G	A	G	0.3067	-0.0069	0.9871	0.9888	Prostate cancer	2	149143446	0.0427	0.8722	GCST90274831	2	149143446	0.0678	6.08e-06	Oncostatin-M levels	0.00181225	1.86e-07	1.66e-05	0.00239557	27.0653	40.9189	20.4629
rs2285179	A	G	A	G	-0.0663	0.01	0.5586	0.5472	Prostate cancer	22	38211954	0.0082	0.2209	GCST90274831	22	38211954	0.0122	5.5e-08	Oncostatin-M levels	0.002063	1.06e-05	1.55e-06	0.00216766	31.0344	40.9189	29.533
rs2511241	T	C	T	C	0.177	0.0121	0.9163	0.9112	Prostate cancer	11	72945341	0.0181	0.5038	GCST90274831	11	72945341	0.0236	6.38e-14	Oncostatin-M levels	0.00409918	3.19e-06	3.53e-12	0.00480551	65.9892	40.9189	56.25
rs28444486	A	G	A	G	0.0636	0.0001	0.7378	0.7317	Prostate cancer	22	49231540	0.0098	0.9897	GCST90274831	22	49231540	0.0136	2.92e-06	Oncostatin-M levels	0.00148218	7.42e-10	8.82e-06	0.001565	23.0934	40.9189	21.8694
rs3859189	A	G	A	G	0.1101	-0.0031	0.5367	0.5444	Prostate cancer	17	38137033	0.008	0.698101	GCST90274831	17	38137033	0.0117	4.95e-21	Oncostatin-M levels	0.00597703	1.07e-06	1.11e-18	0.00602835	89.318	40.9189	88.5529
rs4598859	A	G	A	G	-0.0534	-0.0091	0.494	0.4826	Prostate cancer	15	94565995	0.0085	0.2834	GCST90274831	15	94565995	0.0118	6.03e-06	Oncostatin-M levels	0.00138886	8.17e-06	7.07e-05	0.00142558	21.0216	40.9189	20.4795
rs4779338	A	G	A	G	0.1274	-0.0213	0.211	0.1961	Prostate cancer	15	22508018	0.0193	0.2685	GCST90274831	15	22508018	0.0276	3.91e-06	Oncostatin-M levels	0.00250366	8.68e-06	2.48e-05	0.00540416	46.1252	40.9189	21.3069
rs4818145	A	G	A	G	0.0619	0.005	0.7439	0.7521	Prostate cancer	21	42005707	0.01	0.6136	GCST90274831	21	42005707	0.0138	7.27e-06	Oncostatin-M levels	0.00140638	1.78e-06	3.79e-05	0.00145994	20.8872	40.9189	20.1198
rs4823082	C	G	C	G	-0.159	0.0511	0.0363	0.0302	Prostate cancer	22	30600105	0.0258	0.0470197	GCST90274831	22	30600105	0.0346	4.32e-06	Oncostatin-M levels	0.00143236	2.8e-05	0.000169885	0.00176878	26.0861	40.9189	21.1175
rs559651	T	C	T	C	-0.0594	-0.0002	0.6496	0.6419	Prostate cancer	8	41555366	0.0086	0.9832	GCST90274831	8	41555366	0.0125	2.01e-06	Oncostatin-M levels	0.00153245	3.86e-09	6.41e-06	0.00160625	23.6708	40.9189	22.5815
rs61897429	A	G	A	G	-0.0847	-0.0259	0.139	0.1416	Prostate cancer	11	47424864	0.0116	0.0253198	GCST90274831	11	47424864	0.017	6.28e-07	Oncostatin-M levels	0.00168208	3.55e-05	5.13e-05	0.00171718	25.3427	40.9189	24.8238
rs653178	T	C	T	C	-0.0728	0.019	0.5224	0.5179	Prostate cancer	12	112007756	0.0082	0.0203601	GCST90274831	12	112007756	0.0132	3.48e-08	Oncostatin-M levels	0.00257478	3.83e-05	3.33e-06	0.0026446	31.244	40.9189	30.4169
rs6932879	T	C	T	C	-0.162	0.0079	0.0307	0.0328	Prostate cancer	6	162256951	0.0251	0.753	GCST90274831	6	162256951	0.0356	5.35e-06	Oncostatin-M levels	0.00140422	7.06e-07	2.33e-05	0.00156191	23.0367	40.9189	20.7076
rs7007281	A	T	A	T	0.1155	-0.0093	0.9154	0.9194	Prostate cancer	8	2621859	0.0155	0.5486	GCST90274831	8	2621859	0.0243	2e-06	Oncostatin-M levels	0.00191528	2.57e-06	1.1e-05	0.00206621	24.3759	40.9189	22.5918
rs7102957	T	C	T	C	-0.0803	-0.0206	0.8631	0.8567	Prostate cancer	11	102334152	0.0123	0.0948004	GCST90274831	11	102334152	0.0173	3.46e-06	Oncostatin-M levels	0.00150582	2e-05	9.18e-05	0.00152379	21.8021	40.9189	21.5446
rs76036744	T	C	T	C	0.1893	-0.0368	0.9776	0.9796	Prostate cancer	15	82216867	0.0324	0.2562	GCST90274831	15	82216867	0.0419	6.25e-06	Oncostatin-M levels	0.00143073	9.2e-06	7.54e-05	0.00156942	22.3932	40.9189	20.4114
rs76275710	A	G	A	G	0.2665	0.0659	0.0176	0.0109	Prostate cancer	10	30032133	0.0421	0.1175	GCST90274831	10	30032133	0.0525	3.85e-07	Oncostatin-M levels	0.00174593	1.75e-05	1.39e-05	0.00245598	36.2731	40.9189	25.7677
rs7714366	A	G	A	G	0.0619	-0.0034	0.7535	0.7539	Prostate cancer	5	169867337	0.0095	0.723	GCST90274831	5	169867337	0.0137	6.24e-06	Oncostatin-M levels	0.00138381	9.13e-07	2.83e-05	0.00142335	20.9987	40.9189	20.4146
rs80303768	A	G	A	G	-0.152	0.0109	0.0371	0.0376	Prostate cancer	21	42594678	0.0225	0.6284	GCST90274831	21	42594678	0.0327	3.35e-06	Oncostatin-M levels	0.00146571	1.67e-06	1.94e-05	0.00165072	24.3387	40.9189	21.6069
rs10043030	T	C	T	C	-0.1179	-0.0197	0.0613	0.0578	Prostate cancer	5	159936536	0.0191	0.3018	GCST90274832	5	159936536	0.0248	1.99e-06	Programmed cell death 1 ligand 1 levels	0.00160158	7.58e-06	2.46e-05	0.00159972	22.5746	40.9189	22.6008
rs113674769	T	G	T	G	-0.1142	0.0273	0.074	0.08	Prostate cancer	8	68297799	0.0163	0.094591	GCST90274832	8	68297799	0.025	4.92e-06	Programmed cell death 1 ligand 1 levels	0.00167969	2e-05	9.63e-05	0.00178733	22.2062	40.9189	20.8666
rs11750804	T	C	T	C	-0.0742	-0.0033	0.8494	0.846	Prostate cancer	5	41603985	0.011	0.7615	GCST90274832	5	41603985	0.0164	6.06e-06	Programmed cell death 1 ligand 1 levels	0.00138861	6.42e-07	2.55e-05	0.00140856	20.7646	40.9189	20.4701
rs12539643	C	G	C	G	0.1913	0.03	0.966	0.9631	Prostate cancer	7	151019021	0.0227	0.1866	GCST90274832	7	151019021	0.0407	2.6e-06	Programmed cell death 1 ligand 1 levels	0.00194524	1.25e-05	3.21e-05	0.0024039	27.3138	40.9189	22.0923
rs1280389	A	T	A	T	0.0574	-0.012	0.3335	0.3346	Prostate cancer	15	57727725	0.0089	0.1805	GCST90274832	15	57727725	0.0126	5.22e-06	Programmed cell death 1 ligand 1 levels	0.00145058	1.3e-05	8.54e-05	0.0014647	20.9555	40.9189	20.7531
rs146328951	A	G	A	G	-0.4926	0.1409	0.0079	0.0051	Prostate cancer	1	27646512	0.0586	0.0161399	GCST90274832	1	27646512	0.0993	7.02e-07	Programmed cell death 1 ligand 1 levels	0.00262449	4.12e-05	2.67e-05	0.00380366	35.7076	40.9189	24.6088
rs151255930	T	C	T	C	-0.2518	-0.0162	0.0137	0.0105	Prostate cancer	7	105979524	0.0471	0.731601	GCST90274832	7	105979524	0.0561	7.18e-06	Programmed cell death 1 ligand 1 levels	0.00141264	8.43e-07	3.03e-05	0.00171345	24.4431	40.9189	20.1459
rs181758547	T	C	T	C	-0.3071	0.0832	0.0116	0.0084	Prostate cancer	4	68657948	0.0551	0.1309	GCST90274832	4	68657948	0.069	8.56e-06	Programmed cell death 1 ligand 1 levels	0.00165976	1.63e-05	0.000118572	0.00216262	25.8235	40.9189	19.8089
rs2019137	A	G	A	G	-0.0507	0.0026	0.4683	0.473	Prostate cancer	2	113973632	0.0081	0.7489	GCST90274832	2	113973632	0.0114	8.69e-06	Programmed cell death 1 ligand 1 levels	0.0013407	7.35e-07	3.62e-05	0.00128008	18.8836	40.9189	19.7791
rs2283438	T	C	T	C	-0.0577	0.0071	0.4351	0.4236	Prostate cancer	15	89721461	0.0086	0.407	GCST90274832	15	89721461	0.012	1.52e-06	Programmed cell death 1 ligand 1 levels	0.00161576	4.86e-06	1.5e-05	0.0016366	23.4188	40.9189	23.1201
rs4974444	A	G	A	G	-0.0816	-0.0087	0.8717	0.8817	Prostate cancer	3	127280969	0.013	0.5033	GCST90274832	3	127280969	0.0176	3.55e-06	Programmed cell death 1 ligand 1 levels	0.00150242	3.19e-06	2.53e-05	0.00148938	21.3089	40.9189	21.4959
rs60830384	A	T	A	T	0.1138	-0.0038	0.916	0.9271	Prostate cancer	9	5485387	0.0157	0.8076	GCST90274832	9	5485387	0.0213	9.16e-08	Programmed cell death 1 ligand 1 levels	0.00193595	4.18e-07	5.55e-07	0.00199292	29.3863	40.9189	28.5447
rs62373966	T	G	T	G	0.1407	-0.0085	0.9234	0.9437	Prostate cancer	5	90058982	0.0182	0.6407	GCST90274832	5	90058982	0.0273	2.55e-07	Programmed cell death 1 ligand 1 levels	0.00225073	1.56e-06	1.45e-06	0.00280051	33.0686	40.9189	26.5621
[truncated: 503 more rows]
