# Supplementary material for: Genetically predicted 91 circulating inflammatory proteins in relation to risk of urological malignancies: a Mendelian randomization study
Source: Aging (Albany NY). 2024 Jun 13;16(12):10366–79. doi: 10.18632/aging.205934 (PMC11236305; doi:10.18632/aging.205934)
Supplement: Supplementary Table 4 [file aging-16-205934-s005.xlsx]

## Sheet: Sheet1
Supplement Table 4. The results of Cochrane’s Q-test for 91 plasma proteins on Kca, Bca, PCa
id.exposure	exposure	outcome	method	Q	Q_df	Q_pval
GCST90274758	Eukaryotic translation initiation factor 4E-binding protein 1 levels	kidney cancer	MR Egger	20.1104	15	0.16774
GCST90274758	Eukaryotic translation initiation factor 4E-binding protein 1 levels	kidney cancer	Inverse variance weighted	20.4182	16	0.201973
GCST90274759	Adenosine Deaminase levels	kidney cancer	MR Egger	10.8035	3	0.0128373
GCST90274759	Adenosine Deaminase levels	kidney cancer	Inverse variance weighted	12.3229	4	0.0151047
GCST90274760	Artemin levels	kidney cancer	MR Egger	29.2985	27	0.346574
GCST90274760	Artemin levels	kidney cancer	Inverse variance weighted	34.7434	28	0.177461
GCST90274761	Axin-1 levels	kidney cancer	MR Egger	6.87725	10	0.736981
GCST90274761	Axin-1 levels	kidney cancer	Inverse variance weighted	8.51142	11	0.66689
GCST90274762	beta-nerve growth factor levels	kidney cancer	MR Egger	24.1893	31	0.802743
GCST90274762	beta-nerve growth factor levels	kidney cancer	Inverse variance weighted	24.1896	32	0.837471
GCST90274763	Caspase 8 levels	kidney cancer	MR Egger	11.9766	18	0.848446
GCST90274763	Caspase 8 levels	kidney cancer	Inverse variance weighted	12.0891	19	0.881782
GCST90274764	Eotaxin levels	kidney cancer	MR Egger	15.8497	24	0.893424
GCST90274764	Eotaxin levels	kidney cancer	Inverse variance weighted	15.8643	25	0.91881
GCST90274765	C-C motif chemokine 19 levels	kidney cancer	MR Egger	41.3108	32	0.125369
GCST90274765	C-C motif chemokine 19 levels	kidney cancer	Inverse variance weighted	42.5238	33	0.123891
GCST90274766	C-C motif chemokine 20 levels	kidney cancer	MR Egger	24.6107	29	0.698282
GCST90274766	C-C motif chemokine 20 levels	kidney cancer	Inverse variance weighted	26.4916	30	0.64982
GCST90274767	C-C motif chemokine 23 levels	kidney cancer	MR Egger	35.6696	33	0.343921
GCST90274767	C-C motif chemokine 23 levels	kidney cancer	Inverse variance weighted	38.2492	34	0.282504
GCST90274768	C-C motif chemokine 25 levels	kidney cancer	MR Egger	13.7358	13	0.392707
GCST90274768	C-C motif chemokine 25 levels	kidney cancer	Inverse variance weighted	15.0181	14	0.376918
GCST90274769	C-C motif chemokine 28 levels	kidney cancer	MR Egger	47.3884	33	0.0501149
GCST90274769	C-C motif chemokine 28 levels	kidney cancer	Inverse variance weighted	47.9382	34	0.0569409
GCST90274770	C-C motif chemokine 4 levels	kidney cancer	MR Egger	30.281	28	0.349915
GCST90274770	C-C motif chemokine 4 levels	kidney cancer	Inverse variance weighted	30.9576	29	0.367427
GCST90274771	Natural killer cell receptor 2B4 levels	kidney cancer	MR Egger	26.9027	29	0.576953
GCST90274771	Natural killer cell receptor 2B4 levels	kidney cancer	Inverse variance weighted	30.4434	30	0.443121
GCST90274772	CD40L receptor levels	kidney cancer	MR Egger	20.2193	22	0.569324
GCST90274772	CD40L receptor levels	kidney cancer	Inverse variance weighted	21.2847	23	0.563705
GCST90274773	T-cell surface glycoprotein CD5 levels	kidney cancer	MR Egger	29.8411	25	0.230292
GCST90274773	T-cell surface glycoprotein CD5 levels	kidney cancer	Inverse variance weighted	31.2481	26	0.219159
GCST90274774	T-cell surface glycoprotein CD6 isoform levels	kidney cancer	MR Egger	3.43634	6	0.752419
GCST90274774	T-cell surface glycoprotein CD6 isoform levels	kidney cancer	Inverse variance weighted	5.81436	7	0.561585
GCST90274775	CUB domain-containing protein 1 levels	kidney cancer	MR Egger	25.9085	30	0.679794
GCST90274775	CUB domain-containing protein 1 levels	kidney cancer	Inverse variance weighted	28.9986	31	0.569305
GCST90274776	Macrophage colony-stimulating factor 1 levels	kidney cancer	MR Egger	15.2566	27	0.965677
GCST90274776	Macrophage colony-stimulating factor 1 levels	kidney cancer	Inverse variance weighted	15.4373	28	0.973441
GCST90274777	Cystatin D levels	kidney cancer	MR Egger	14.4643	13	0.34198
GCST90274777	Cystatin D levels	kidney cancer	Inverse variance weighted	14.5137	14	0.412186
GCST90274778	Fractalkine levels	kidney cancer	MR Egger	43.0797	31	0.0731122
GCST90274778	Fractalkine levels	kidney cancer	Inverse variance weighted	45.2679	32	0.0601615
GCST90274779	C-X-C motif chemokine 1 levels	kidney cancer	MR Egger	32.83	24	0.107713
GCST90274779	C-X-C motif chemokine 1 levels	kidney cancer	Inverse variance weighted	33.3863	25	0.12169
GCST90274780	C-X-C motif chemokine 10 levels	kidney cancer	MR Egger	40.1527	28	0.0640847
GCST90274780	C-X-C motif chemokine 10 levels	kidney cancer	Inverse variance weighted	45.7518	29	0.0248325
GCST90274781	C-X-C motif chemokine 11 levels	kidney cancer	MR Egger	30.0968	36	0.744745
GCST90274781	C-X-C motif chemokine 11 levels	kidney cancer	Inverse variance weighted	30.1089	37	0.781761
GCST90274782	C-X-C motif chemokine 5 levels	kidney cancer	MR Egger	15.6647	20	0.737197
GCST90274782	C-X-C motif chemokine 5 levels	kidney cancer	Inverse variance weighted	16.1152	21	0.763143
GCST90274783	C-X-C motif chemokine 6 levels	kidney cancer	MR Egger	4.55131	4	0.336507
GCST90274783	C-X-C motif chemokine 6 levels	kidney cancer	Inverse variance weighted	7.31267	5	0.198406
GCST90274784	C-X-C motif chemokine 9 levels	kidney cancer	MR Egger	31.1066	35	0.656627
GCST90274784	C-X-C motif chemokine 9 levels	kidney cancer	Inverse variance weighted	31.6197	36	0.67699
GCST90274785	Delta and Notch-like epidermal growth factor-related receptor levels	kidney cancer	MR Egger	30.314	26	0.254808
GCST90274785	Delta and Notch-like epidermal growth factor-related receptor levels	kidney cancer	Inverse variance weighted	30.315	27	0.300189
GCST90274786	Protein S100-A12 levels	kidney cancer	MR Egger	17.4586	21	0.682957
GCST90274786	Protein S100-A12 levels	kidney cancer	Inverse variance weighted	18.7117	22	0.663057
GCST90274787	Fibroblast growth factor 19 levels	kidney cancer	MR Egger	31.0707	32	0.513424
GCST90274787	Fibroblast growth factor 19 levels	kidney cancer	Inverse variance weighted	31.8945	33	0.522019
GCST90274788	Fibroblast growth factor 21 levels	kidney cancer	MR Egger	21.0301	22	0.518876
GCST90274788	Fibroblast growth factor 21 levels	kidney cancer	Inverse variance weighted	21.0773	23	0.576369
GCST90274789	Fibroblast growth factor 23 levels	kidney cancer	MR Egger	25.8662	25	0.414769
GCST90274789	Fibroblast growth factor 23 levels	kidney cancer	Inverse variance weighted	26.1343	26	0.455742
GCST90274790	Fibroblast growth factor 5 levels	kidney cancer	MR Egger	6.77022	4	0.148541
GCST90274790	Fibroblast growth factor 5 levels	kidney cancer	Inverse variance weighted	7.03701	5	0.217902
GCST90274791	Fms-related tyrosine kinase 3 ligand levels	kidney cancer	MR Egger	44.5277	42	0.365831
GCST90274791	Fms-related tyrosine kinase 3 ligand levels	kidney cancer	Inverse variance weighted	45.0273	43	0.387072
GCST90274792	Glial cell line-derived neurotrophic factor levels	kidney cancer	MR Egger	23.1442	22	0.393624
GCST90274792	Glial cell line-derived neurotrophic factor levels	kidney cancer	Inverse variance weighted	23.6425	23	0.423819
GCST90274793	Hepatocyte growth factor levels	kidney cancer	MR Egger	17.7841	24	0.813353
GCST90274793	Hepatocyte growth factor levels	kidney cancer	Inverse variance weighted	17.9217	25	0.845695
GCST90274794	Interferon gamma levels	kidney cancer	MR Egger	22.1554	17	0.178816
GCST90274794	Interferon gamma levels	kidney cancer	Inverse variance weighted	23.1322	18	0.18556
GCST90274795	Interleukin-10 levels	kidney cancer	MR Egger	39.1601	30	0.122182
GCST90274795	Interleukin-10 levels	kidney cancer	Inverse variance weighted	39.1912	31	0.148314
GCST90274796	Interleukin-10 receptor subunit alpha levels	kidney cancer	MR Egger	16.0311	16	0.450792
GCST90274796	Interleukin-10 receptor subunit alpha levels	kidney cancer	Inverse variance weighted	16.5284	17	0.48673
GCST90274797	Interleukin-10 receptor subunit beta levels	kidney cancer	MR Egger	20.9129	25	0.697454
GCST90274797	Interleukin-10 receptor subunit beta levels	kidney cancer	Inverse variance weighted	20.9748	26	0.743264
GCST90274798	Interleukin-12 subunit beta levels	kidney cancer	MR Egger	31.2916	18	0.0266292
GCST90274798	Interleukin-12 subunit beta levels	kidney cancer	Inverse variance weighted	31.3952	19	0.0365168
GCST90274799	Interleukin-13 levels	kidney cancer	MR Egger	23.1932	30	0.807236
GCST90274799	Interleukin-13 levels	kidney cancer	Inverse variance weighted	24.6841	31	0.781668
GCST90274800	Interleukin-15 receptor subunit alpha levels	kidney cancer	MR Egger	27.2081	21	0.164072
GCST90274800	Interleukin-15 receptor subunit alpha levels	kidney cancer	Inverse variance weighted	27.22	22	0.202991
GCST90274801	Interleukin-17A levels	kidney cancer	MR Egger	21.8867	18	0.237054
GCST90274801	Interleukin-17A levels	kidney cancer	Inverse variance weighted	24.4497	19	0.179464
GCST90274802	Interleukin-17C levels	kidney cancer	MR Egger	31.8207	34	0.574856
GCST90274802	Interleukin-17C levels	kidney cancer	Inverse variance weighted	32.3177	35	0.59827
GCST90274803	Interleukin-18 levels	kidney cancer	MR Egger	21.0057	29	0.858942
GCST90274803	Interleukin-18 levels	kidney cancer	Inverse variance weighted	21.3266	30	0.877398
GCST90274804	interleukin-18 receptor 1 levels	kidney cancer	MR Egger	6.06599	7	0.532065
GCST90274804	interleukin-18 receptor 1 levels	kidney cancer	Inverse variance weighted	6.29617	8	0.614094
GCST90274805	Interleukin-1-alpha levels	kidney cancer	MR Egger	13.5335	19	0.810178
GCST90274805	Interleukin-1-alpha levels	kidney cancer	Inverse variance weighted	13.5486	20	0.852625
GCST90274806	Interleukin-2 levels	kidney cancer	MR Egger	13.7001	18	0.748421
GCST90274806	Interleukin-2 levels	kidney cancer	Inverse variance weighted	18.3634	19	0.498299
GCST90274807	Interleukin-20 levels	kidney cancer	MR Egger	21.4832	20	0.369198
GCST90274807	Interleukin-20 levels	kidney cancer	Inverse variance weighted	22.8871	21	0.350029
GCST90274808	Interleukin-20 receptor subunit alpha levels	kidney cancer	MR Egger	13.8224	19	0.793945
GCST90274808	Interleukin-20 receptor subunit alpha levels	kidney cancer	Inverse variance weighted	13.9371	20	0.833671
GCST90274809	Interleukin-22 receptor subunit alpha-1 levels	kidney cancer	MR Egger	19.692	16	0.234416
GCST90274809	Interleukin-22 receptor subunit alpha-1 levels	kidney cancer	Inverse variance weighted	19.8387	17	0.282564
GCST90274810	Interleukin-24 levels	kidney cancer	MR Egger	11.7875	18	0.85801
GCST90274810	Interleukin-24 levels	kidney cancer	Inverse variance weighted	11.7939	19	0.894247
GCST90274811	Interleukin-2 receptor subunit beta levels	kidney cancer	MR Egger	26.6921	21	0.181278
GCST90274811	Interleukin-2 receptor subunit beta levels	kidney cancer	Inverse variance weighted	26.7748	22	0.219905
GCST90274812	Interleukin-33 levels	kidney cancer	MR Egger	15.1777	20	0.766152
GCST90274812	Interleukin-33 levels	kidney cancer	Inverse variance weighted	16.1428	21	0.761572
GCST90274813	Interleukin-4 levels	kidney cancer	MR Egger	24.4593	19	0.179121
GCST90274813	Interleukin-4 levels	kidney cancer	Inverse variance weighted	24.6519	20	0.215076
GCST90274814	Interleukin-5 levels	kidney cancer	MR Egger	29.4041	22	0.133681
GCST90274814	Interleukin-5 levels	kidney cancer	Inverse variance weighted	30.0107	23	0.149095
GCST90274815	Interleukin-6 levels	kidney cancer	MR Egger	9.42097	10	0.492672
GCST90274815	Interleukin-6 levels	kidney cancer	Inverse variance weighted	9.72528	11	0.555254
GCST90274816	Interleukin-7 levels	kidney cancer	MR Egger	20.5217	21	0.488468
GCST90274816	Interleukin-7 levels	kidney cancer	Inverse variance weighted	21.2762	22	0.503732
GCST90274817	Interleukin-8 levels	kidney cancer	MR Egger	29.3157	23	0.170071
GCST90274817	Interleukin-8 levels	kidney cancer	Inverse variance weighted	29.4408	24	0.203981
GCST90274818	Latency-associated peptide transforming growth factor beta 1 levels	kidney cancer	MR Egger	28.6034	31	0.589879
GCST90274818	Latency-associated peptide transforming growth factor beta 1 levels	kidney cancer	Inverse variance weighted	32.3436	32	0.449797
GCST90274819	Leukemia inhibitory factor levels	kidney cancer	MR Egger	36.6726	25	0.0619963
GCST90274819	Leukemia inhibitory factor levels	kidney cancer	Inverse variance weighted	36.8186	26	0.07761
GCST90274820	Leukemia inhibitory factor receptor levels	kidney cancer	MR Egger	20.7044	25	0.70897
GCST90274820	Leukemia inhibitory factor receptor levels	kidney cancer	Inverse variance weighted	21.4245	26	0.719733
GCST90274821	Monocyte chemoattractant protein-1 levels	kidney cancer	MR Egger	24.368	25	0.498198
GCST90274821	Monocyte chemoattractant protein-1 levels	kidney cancer	Inverse variance weighted	24.3853	26	0.553943
GCST90274822	Monocyte chemoattractant protein 2 levels	kidney cancer	MR Egger	1.10843	4	0.892932
GCST90274822	Monocyte chemoattractant protein 2 levels	kidney cancer	Inverse variance weighted	1.11866	5	0.952438
GCST90274823	Monocyte chemoattractant protein-3 levels	kidney cancer	MR Egger	28.0983	25	0.30335
GCST90274823	Monocyte chemoattractant protein-3 levels	kidney cancer	Inverse variance weighted	28.1837	26	0.34948
GCST90274824	Monocyte chemoattractant protein-4 levels	kidney cancer	MR Egger	27.2512	25	0.343454
GCST90274824	Monocyte chemoattractant protein-4 levels	kidney cancer	Inverse variance weighted	27.2541	26	0.396106
GCST90274825	Macrophage inflammatory protein 1a levels	kidney cancer	MR Egger	16.0743	18	0.587365
GCST90274825	Macrophage inflammatory protein 1a levels	kidney cancer	Inverse variance weighted	18.0378	19	0.519915
GCST90274826	Matrix metalloproteinase-1 levels	kidney cancer	MR Egger	32.4526	25	0.14533
GCST90274826	Matrix metalloproteinase-1 levels	kidney cancer	Inverse variance weighted	32.7396	26	0.169787
GCST90274827	Matrix metalloproteinase-10 levels	kidney cancer	MR Egger	27.8338	23	0.222133
GCST90274827	Matrix metalloproteinase-10 levels	kidney cancer	Inverse variance weighted	27.8347	24	0.267076
GCST90274828	Neurturin levels	kidney cancer	MR Egger	19.1663	21	0.574472
GCST90274828	Neurturin levels	kidney cancer	Inverse variance weighted	19.1986	22	0.633037
GCST90274829	Neurotrophin-3 levels	kidney cancer	MR Egger	46.5103	28	0.0154227
GCST90274829	Neurotrophin-3 levels	kidney cancer	Inverse variance weighted	46.5533	29	0.0206574
GCST90274830	Osteoprotegerin levels	kidney cancer	MR Egger	46.9494	28	0.0138687
GCST90274830	Osteoprotegerin levels	kidney cancer	Inverse variance weighted	47.0437	29	0.0184277
GCST90274831	Oncostatin-M levels	kidney cancer	MR Egger	22.0908	20	0.335607
GCST90274831	Oncostatin-M levels	kidney cancer	Inverse variance weighted	22.1139	21	0.392969
GCST90274832	Programmed cell death 1 ligand 1 levels	kidney cancer	MR Egger	24.9844	26	0.519856
GCST90274832	Programmed cell death 1 ligand 1 levels	kidney cancer	Inverse variance weighted	25.1508	27	0.566012
GCST90274833	Stem cell factor levels	kidney cancer	MR Egger	49.0974	42	0.209985
GCST90274833	Stem cell factor levels	kidney cancer	Inverse variance weighted	52.2342	43	0.157927
GCST90274834	SIR2-like protein 2 levels	kidney cancer	MR Egger	6.08454	14	0.964316
GCST90274834	SIR2-like protein 2 levels	kidney cancer	Inverse variance weighted	8.83655	15	0.885907
GCST90274835	Signaling lymphocytic activation molecule levels	kidney cancer	MR Egger	43.0508	37	0.228155
GCST90274835	Signaling lymphocytic activation molecule levels	kidney cancer	Inverse variance weighted	44.2039	38	0.226084
GCST90274836	Sulfotransferase 1A1 levels	kidney cancer	MR Egger	22.9433	29	0.779131
GCST90274836	Sulfotransferase 1A1 levels	kidney cancer	Inverse variance weighted	33.4931	30	0.301548
GCST90274837	STAM binding protein levels	kidney cancer	MR Egger	28.9329	19	0.0670483
GCST90274837	STAM binding protein levels	kidney cancer	Inverse variance weighted	29.1507	20	0.0848336
GCST90274838	Transforming growth factor-alpha levels	kidney cancer	MR Egger	21.7623	21	0.41332
GCST90274838	Transforming growth factor-alpha levels	kidney cancer	Inverse variance weighted	21.7803	22	0.473068
GCST90274839	Tumor necrosis factor levels	kidney cancer	MR Egger	37.5576	24	0.0384622
GCST90274839	Tumor necrosis factor levels	kidney cancer	Inverse variance weighted	37.5705	25	0.0509201
GCST90274840	TNF-beta levels	kidney cancer	MR Egger	3.21607	7	0.864321
GCST90274840	TNF-beta levels	kidney cancer	Inverse variance weighted	3.60895	8	0.890571
GCST90274841	Tumor necrosis factor receptor superfamily member 9 levels	kidney cancer	MR Egger	21.5901	29	0.836761
GCST90274841	Tumor necrosis factor receptor superfamily member 9 levels	kidney cancer	Inverse variance weighted	25.5306	30	0.698859
GCST90274842	Tumor necrosis factor ligand superfamily member 14 levels	kidney cancer	MR Egger	22.7658	34	0.928786
GCST90274842	Tumor necrosis factor ligand superfamily member 14 levels	kidney cancer	Inverse variance weighted	22.8533	35	0.943244
GCST90274843	TNF-related apoptosis-inducing ligand levels	kidney cancer	MR Egger	38.4576	33	0.236051
GCST90274843	TNF-related apoptosis-inducing ligand levels	kidney cancer	Inverse variance weighted	38.992	34	0.25525
GCST90274844	TNF-related activation-induced cytokine levels	kidney cancer	MR Egger	44.2794	47	0.585913
GCST90274844	TNF-related activation-induced cytokine levels	kidney cancer	Inverse variance weighted	44.3829	48	0.621844
GCST90274845	Thymic stromal lymphopoietin levels	kidney cancer	MR Egger	20.4478	21	0.493077
GCST90274845	Thymic stromal lymphopoietin levels	kidney cancer	Inverse variance weighted	20.4515	22	0.554819
GCST90274846	Tumor necrosis factor ligand superfamily member 12 levels	kidney cancer	MR Egger	41.854	39	0.348002
GCST90274846	Tumor necrosis factor ligand superfamily member 12 levels	kidney cancer	Inverse variance weighted	41.8892	40	0.388849
GCST90274847	Urokinase-type plasminogen activator levels	kidney cancer	MR Egger	25.8398	39	0.94773
GCST90274847	Urokinase-type plasminogen activator levels	kidney cancer	Inverse variance weighted	28.8065	40	0.905824
GCST90274848	Vascular endothelial growth factor A levels	kidney cancer	MR Egger	15.4816	30	0.98672
GCST90274848	Vascular endothelial growth factor A levels	kidney cancer	Inverse variance weighted	15.4822	31	0.990902
GCST90274758	Eukaryotic translation initiation factor 4E-binding protein 1 levels	Prostate cancer	MR Egger	14.2777	15	0.504577
GCST90274758	Eukaryotic translation initiation factor 4E-binding protein 1 levels	Prostate cancer	Inverse variance weighted	15.5168	16	0.487163
GCST90274759	Adenosine Deaminase levels	Prostate cancer	MR Egger	1.2322	2	0.540047
GCST90274759	Adenosine Deaminase levels	Prostate cancer	Inverse variance weighted	3.80204	3	0.283649
GCST90274760	Artemin levels	Prostate cancer	MR Egger	29.0122	28	0.411911
GCST90274760	Artemin levels	Prostate cancer	Inverse variance weighted	30.0602	29	0.411005
GCST90274761	Axin-1 levels	Prostate cancer	MR Egger	15.8748	10	0.103274
GCST90274761	Axin-1 levels	Prostate cancer	Inverse variance weighted	18.972	11	0.0615975
GCST90274762	beta-nerve growth factor levels	Prostate cancer	MR Egger	39.2681	30	0.119835
GCST90274762	beta-nerve growth factor levels	Prostate cancer	Inverse variance weighted	39.4773	31	0.141258
GCST90274763	Caspase 8 levels	Prostate cancer	MR Egger	26.344	20	0.154748
GCST90274763	Caspase 8 levels	Prostate cancer	Inverse variance weighted	30.2939	21	0.0862399
GCST90274764	Eotaxin levels	Prostate cancer	MR Egger	29.6773	22	0.126522
GCST90274764	Eotaxin levels	Prostate cancer	Inverse variance weighted	29.9673	23	0.150344
GCST90274765	C-C motif chemokine 19 levels	Prostate cancer	MR Egger	61.2882	36	0.00536307
GCST90274765	C-C motif chemokine 19 levels	Prostate cancer	Inverse variance weighted	61.3035	37	0.00724236
GCST90274766	C-C motif chemokine 20 levels	Prostate cancer	MR Egger	23.8094	24	0.472539
GCST90274766	C-C motif chemokine 20 levels	Prostate cancer	Inverse variance weighted	24.0229	25	0.518049
GCST90274767	C-C motif chemokine 23 levels	Prostate cancer	MR Egger	33.4284	32	0.397774
GCST90274767	C-C motif chemokine 23 levels	Prostate cancer	Inverse variance weighted	33.4884	33	0.443579
GCST90274768	C-C motif chemokine 25 levels	Prostate cancer	MR Egger	16.4016	13	0.228122
GCST90274768	C-C motif chemokine 25 levels	Prostate cancer	Inverse variance weighted	18.8733	14	0.169848
GCST90274769	C-C motif chemokine 28 levels	Prostate cancer	MR Egger	41.8864	33	0.138041
GCST90274769	C-C motif chemokine 28 levels	Prostate cancer	Inverse variance weighted	41.9261	34	0.164843
GCST90274770	C-C motif chemokine 4 levels	Prostate cancer	MR Egger	37.585	26	0.0661429
GCST90274770	C-C motif chemokine 4 levels	Prostate cancer	Inverse variance weighted	38.4421	27	0.0711355
GCST90274771	Natural killer cell receptor 2B4 levels	Prostate cancer	MR Egger	42.6591	28	0.0375361
GCST90274771	Natural killer cell receptor 2B4 levels	Prostate cancer	Inverse variance weighted	42.9204	29	0.0463053
GCST90274772	CD40L receptor levels	Prostate cancer	MR Egger	23.2022	22	0.390389
GCST90274772	CD40L receptor levels	Prostate cancer	Inverse variance weighted	23.3531	23	0.440319
GCST90274773	T-cell surface glycoprotein CD5 levels	Prostate cancer	MR Egger	46.6877	27	0.0107173
GCST90274773	T-cell surface glycoprotein CD5 levels	Prostate cancer	Inverse variance weighted	50.2502	28	0.00606392
GCST90274774	T-cell surface glycoprotein CD6 isoform levels	Prostate cancer	MR Egger	6.25954	5	0.281778
GCST90274774	T-cell surface glycoprotein CD6 isoform levels	Prostate cancer	Inverse variance weighted	6.33966	6	0.386236
GCST90274775	CUB domain-containing protein 1 levels	Prostate cancer	MR Egger	34.6581	31	0.29755
GCST90274775	CUB domain-containing protein 1 levels	Prostate cancer	Inverse variance weighted	34.9395	32	0.330118
GCST90274776	Macrophage colony-stimulating factor 1 levels	Prostate cancer	MR Egger	29.6092	27	0.331995
GCST90274776	Macrophage colony-stimulating factor 1 levels	Prostate cancer	Inverse variance weighted	30.7545	28	0.32809
GCST90274777	Cystatin D levels	Prostate cancer	MR Egger	26.4192	14	0.0228845
GCST90274777	Cystatin D levels	Prostate cancer	Inverse variance weighted	27.4889	15	0.0249963
GCST90274778	Fractalkine levels	Prostate cancer	MR Egger	22.3008	28	0.767178
GCST90274778	Fractalkine levels	Prostate cancer	Inverse variance weighted	23.6534	29	0.745828
GCST90274779	C-X-C motif chemokine 1 levels	Prostate cancer	MR Egger	20.9686	22	0.522683
GCST90274779	C-X-C motif chemokine 1 levels	Prostate cancer	Inverse variance weighted	21.0734	23	0.576608
GCST90274780	C-X-C motif chemokine 10 levels	Prostate cancer	MR Egger	40.2408	23	0.0144409
GCST90274780	C-X-C motif chemokine 10 levels	Prostate cancer	Inverse variance weighted	40.3375	24	0.0196686
GCST90274781	C-X-C motif chemokine 11 levels	Prostate cancer	MR Egger	49.5124	33	0.0324005
GCST90274781	C-X-C motif chemokine 11 levels	Prostate cancer	Inverse variance weighted	49.5352	34	0.041493
GCST90274782	C-X-C motif chemokine 5 levels	Prostate cancer	MR Egger	31.2513	18	0.0269186
GCST90274782	C-X-C motif chemokine 5 levels	Prostate cancer	Inverse variance weighted	31.252	19	0.0378745
GCST90274783	C-X-C motif chemokine 6 levels	Prostate cancer	MR Egger	6.79211	3	0.0788275
GCST90274783	C-X-C motif chemokine 6 levels	Prostate cancer	Inverse variance weighted	6.96466	4	0.137768
GCST90274784	C-X-C motif chemokine 9 levels	Prostate cancer	MR Egger	59.2013	31	0.00167438
GCST90274784	C-X-C motif chemokine 9 levels	Prostate cancer	Inverse variance weighted	60.0774	32	0.00190811
GCST90274785	Delta and Notch-like epidermal growth factor-related receptor levels	Prostate cancer	MR Egger	28.0275	25	0.306587
GCST90274785	Delta and Notch-like epidermal growth factor-related receptor levels	Prostate cancer	Inverse variance weighted	29.7928	26	0.276283
GCST90274786	Protein S100-A12 levels	Prostate cancer	MR Egger	36.022	21	0.0217413
GCST90274786	Protein S100-A12 levels	Prostate cancer	Inverse variance weighted	42.877	22	0.00488639
GCST90274787	Fibroblast growth factor 19 levels	Prostate cancer	MR Egger	47.9769	29	0.0147791
GCST90274787	Fibroblast growth factor 19 levels	Prostate cancer	Inverse variance weighted	48.1452	30	0.019174
GCST90274788	Fibroblast growth factor 21 levels	Prostate cancer	MR Egger	25.6766	22	0.265826
GCST90274788	Fibroblast growth factor 21 levels	Prostate cancer	Inverse variance weighted	30.9133	23	0.124938
GCST90274789	Fibroblast growth factor 23 levels	Prostate cancer	MR Egger	19.9473	20	0.461229
GCST90274789	Fibroblast growth factor 23 levels	Prostate cancer	Inverse variance weighted	19.9689	21	0.523234
GCST90274790	Fibroblast growth factor 5 levels	Prostate cancer	MR Egger	5.4745	3	0.140172
GCST90274790	Fibroblast growth factor 5 levels	Prostate cancer	Inverse variance weighted	6.43432	4	0.168976
GCST90274791	Fms-related tyrosine kinase 3 ligand levels	Prostate cancer	MR Egger	59.4505	39	0.0189969
GCST90274791	Fms-related tyrosine kinase 3 ligand levels	Prostate cancer	Inverse variance weighted	61.7169	40	0.0153043
GCST90274792	Glial cell line-derived neurotrophic factor levels	Prostate cancer	MR Egger	25.7347	23	0.313549
GCST90274792	Glial cell line-derived neurotrophic factor levels	Prostate cancer	Inverse variance weighted	26.3928	24	0.33354
GCST90274793	Hepatocyte growth factor levels	Prostate cancer	MR Egger	62.548	27	0.000121074
GCST90274793	Hepatocyte growth factor levels	Prostate cancer	Inverse variance weighted	62.6989	28	0.000182078
GCST90274794	Interferon gamma levels	Prostate cancer	MR Egger	14.8128	17	0.60896
GCST90274794	Interferon gamma levels	Prostate cancer	Inverse variance weighted	14.8789	18	0.670262
GCST90274795	Interleukin-10 levels	Prostate cancer	MR Egger	24.5867	29	0.699505
GCST90274795	Interleukin-10 levels	Prostate cancer	Inverse variance weighted	24.5954	30	0.744444
GCST90274796	Interleukin-10 receptor subunit alpha levels	Prostate cancer	MR Egger	33.571	18	0.0142221
GCST90274796	Interleukin-10 receptor subunit alpha levels	Prostate cancer	Inverse variance weighted	33.6958	19	0.0199549
GCST90274797	Interleukin-10 receptor subunit beta levels	Prostate cancer	MR Egger	29.9282	24	0.187143
GCST90274797	Interleukin-10 receptor subunit beta levels	Prostate cancer	Inverse variance weighted	32.7683	25	0.136964
GCST90274798	Interleukin-12 subunit beta levels	Prostate cancer	MR Egger	23.6145	13	0.0348666
GCST90274798	Interleukin-12 subunit beta levels	Prostate cancer	Inverse variance weighted	23.7457	14	0.0491677
GCST90274799	Interleukin-13 levels	Prostate cancer	MR Egger	26.3014	28	0.556484
GCST90274799	Interleukin-13 levels	Prostate cancer	Inverse variance weighted	26.4372	29	0.602042
GCST90274800	Interleukin-15 receptor subunit alpha levels	Prostate cancer	MR Egger	29.7333	20	0.0742926
GCST90274800	Interleukin-15 receptor subunit alpha levels	Prostate cancer	Inverse variance weighted	30.7506	21	0.0779107
GCST90274801	Interleukin-17A levels	Prostate cancer	MR Egger	34.141	19	0.0176862
GCST90274801	Interleukin-17A levels	Prostate cancer	Inverse variance weighted	34.3647	20	0.0237607
GCST90274802	Interleukin-17C levels	Prostate cancer	MR Egger	37.5033	33	0.270193
GCST90274802	Interleukin-17C levels	Prostate cancer	Inverse variance weighted	40.0589	34	0.21918
GCST90274803	Interleukin-18 levels	Prostate cancer	MR Egger	33.5285	26	0.147313
GCST90274803	Interleukin-18 levels	Prostate cancer	Inverse variance weighted	33.5291	27	0.180166
GCST90274804	interleukin-18 receptor 1 levels	Prostate cancer	MR Egger	5.41119	8	0.712858
GCST90274804	interleukin-18 receptor 1 levels	Prostate cancer	Inverse variance weighted	11.5988	9	0.236884
GCST90274805	Interleukin-1-alpha levels	Prostate cancer	MR Egger	29.9427	23	0.151053
GCST90274805	Interleukin-1-alpha levels	Prostate cancer	Inverse variance weighted	32.925	24	0.105666
GCST90274806	Interleukin-2 levels	Prostate cancer	MR Egger	14.2284	18	0.714087
GCST90274806	Interleukin-2 levels	Prostate cancer	Inverse variance weighted	17.2848	19	0.570582
GCST90274807	Interleukin-20 levels	Prostate cancer	MR Egger	35.0963	19	0.0135985
GCST90274807	Interleukin-20 levels	Prostate cancer	Inverse variance weighted	35.3527	20	0.0183043
GCST90274808	Interleukin-20 receptor subunit alpha levels	Prostate cancer	MR Egger	19.8332	16	0.227829
GCST90274808	Interleukin-20 receptor subunit alpha levels	Prostate cancer	Inverse variance weighted	21.1122	17	0.221314
GCST90274809	Interleukin-22 receptor subunit alpha-1 levels	Prostate cancer	MR Egger	7.78425	16	0.955031
GCST90274809	Interleukin-22 receptor subunit alpha-1 levels	Prostate cancer	Inverse variance weighted	10.0511	17	0.901455
GCST90274810	Interleukin-24 levels	Prostate cancer	MR Egger	14.0419	16	0.595593
GCST90274810	Interleukin-24 levels	Prostate cancer	Inverse variance weighted	18.678	17	0.347322
GCST90274811	Interleukin-2 receptor subunit beta levels	Prostate cancer	MR Egger	20.6721	17	0.241303
GCST90274811	Interleukin-2 receptor subunit beta levels	Prostate cancer	Inverse variance weighted	20.9021	18	0.284381
GCST90274812	Interleukin-33 levels	Prostate cancer	MR Egger	17.5135	17	0.420134
GCST90274812	Interleukin-33 levels	Prostate cancer	Inverse variance weighted	17.5445	18	0.486018
GCST90274813	Interleukin-4 levels	Prostate cancer	MR Egger	27.9663	20	0.1102
GCST90274813	Interleukin-4 levels	Prostate cancer	Inverse variance weighted	28.0439	21	0.138912
GCST90274814	Interleukin-5 levels	Prostate cancer	MR Egger	15.491	19	0.690922
GCST90274814	Interleukin-5 levels	Prostate cancer	Inverse variance weighted	20.132	20	0.449701
GCST90274815	Interleukin-6 levels	Prostate cancer	MR Egger	18.2429	11	0.0761122
GCST90274815	Interleukin-6 levels	Prostate cancer	Inverse variance weighted	23.6288	12	0.0228378
GCST90274816	Interleukin-7 levels	Prostate cancer	MR Egger	21.7252	17	0.195521
GCST90274816	Interleukin-7 levels	Prostate cancer	Inverse variance weighted	23.5976	18	0.168657
GCST90274817	Interleukin-8 levels	Prostate cancer	MR Egger	34.0176	27	0.165535
GCST90274817	Interleukin-8 levels	Prostate cancer	Inverse variance weighted	35.8055	28	0.147618
GCST90274818	Latency-associated peptide transforming growth factor beta 1 levels	Prostate cancer	MR Egger	38.3729	27	0.072155
GCST90274818	Latency-associated peptide transforming growth factor beta 1 levels	Prostate cancer	Inverse variance weighted	40.411	28	0.0607521
GCST90274819	Leukemia inhibitory factor levels	Prostate cancer	MR Egger	18.057	24	0.800234
GCST90274819	Leukemia inhibitory factor levels	Prostate cancer	Inverse variance weighted	18.3463	25	0.827342
GCST90274820	Leukemia inhibitory factor receptor levels	Prostate cancer	MR Egger	30.9424	25	0.190933
GCST90274820	Leukemia inhibitory factor receptor levels	Prostate cancer	Inverse variance weighted	33.4044	26	0.150688
GCST90274821	Monocyte chemoattractant protein-1 levels	Prostate cancer	MR Egger	33.2682	27	0.188361
GCST90274821	Monocyte chemoattractant protein-1 levels	Prostate cancer	Inverse variance weighted	33.275	28	0.225766
GCST90274822	Monocyte chemoattractant protein 2 levels	Prostate cancer	MR Egger	3.65538	3	0.301161
GCST90274822	Monocyte chemoattractant protein 2 levels	Prostate cancer	Inverse variance weighted	6.84506	4	0.144306
GCST90274823	Monocyte chemoattractant protein-3 levels	Prostate cancer	MR Egger	19.5859	24	0.720063
GCST90274823	Monocyte chemoattractant protein-3 levels	Prostate cancer	Inverse variance weighted	19.9848	25	0.747625
GCST90274824	Monocyte chemoattractant protein-4 levels	Prostate cancer	MR Egger	50.7965	29	0.00740193
GCST90274824	Monocyte chemoattractant protein-4 levels	Prostate cancer	Inverse variance weighted	50.9221	30	0.00992756
GCST90274825	Macrophage inflammatory protein 1a levels	Prostate cancer	MR Egger	24.1171	16	0.0869782
GCST90274825	Macrophage inflammatory protein 1a levels	Prostate cancer	Inverse variance weighted	34.8354	17	0.00653817
GCST90274826	Matrix metalloproteinase-1 levels	Prostate cancer	MR Egger	47.984	21	0.000691099
GCST90274826	Matrix metalloproteinase-1 levels	Prostate cancer	Inverse variance weighted	51.4738	22	0.00036936
GCST90274827	Matrix metalloproteinase-10 levels	Prostate cancer	MR Egger	31.038	21	0.0730279
GCST90274827	Matrix metalloproteinase-10 levels	Prostate cancer	Inverse variance weighted	31.1905	22	0.0922826
GCST90274828	Neurturin levels	Prostate cancer	MR Egger	18.5524	21	0.613831
GCST90274828	Neurturin levels	Prostate cancer	Inverse variance weighted	18.9167	22	0.650469
GCST90274829	Neurotrophin-3 levels	Prostate cancer	MR Egger	16.4197	25	0.901754
GCST90274829	Neurotrophin-3 levels	Prostate cancer	Inverse variance weighted	16.6724	26	0.918646
GCST90274830	Osteoprotegerin levels	Prostate cancer	MR Egger	28.7663	23	0.188184
GCST90274830	Osteoprotegerin levels	Prostate cancer	Inverse variance weighted	29.62	24	0.197666
GCST90274831	Oncostatin-M levels	Prostate cancer	MR Egger	28.7839	20	0.0921025
GCST90274831	Oncostatin-M levels	Prostate cancer	Inverse variance weighted	28.852	21	0.117601
GCST90274832	Programmed cell death 1 ligand 1 levels	Prostate cancer	MR Egger	40.8612	22	0.00856003
GCST90274832	Programmed cell death 1 ligand 1 levels	Prostate cancer	Inverse variance weighted	40.8639	23	0.0122736
GCST90274833	Stem cell factor levels	Prostate cancer	MR Egger	55.4927	43	0.0958641
GCST90274833	Stem cell factor levels	Prostate cancer	Inverse variance weighted	58.5289	44	0.0701755
GCST90274834	SIR2-like protein 2 levels	Prostate cancer	MR Egger	11.486	18	0.872606
GCST90274834	SIR2-like protein 2 levels	Prostate cancer	Inverse variance weighted	11.8634	19	0.891379
GCST90274835	Signaling lymphocytic activation molecule levels	Prostate cancer	MR Egger	49.4791	30	0.0140392
GCST90274835	Signaling lymphocytic activation molecule levels	Prostate cancer	Inverse variance weighted	49.9089	31	0.0171127
GCST90274836	Sulfotransferase 1A1 levels	Prostate cancer	MR Egger	31.0557	28	0.314612
GCST90274836	Sulfotransferase 1A1 levels	Prostate cancer	Inverse variance weighted	34.3201	29	0.227736
GCST90274837	STAM binding protein levels	Prostate cancer	MR Egger	27.1367	19	0.101508
GCST90274837	STAM binding protein levels	Prostate cancer	Inverse variance weighted	28.4991	20	0.0981018
GCST90274838	Transforming growth factor-alpha levels	Prostate cancer	MR Egger	20.4917	23	0.612099
GCST90274838	Transforming growth factor-alpha levels	Prostate cancer	Inverse variance weighted	24.1901	24	0.450772
GCST90274839	Tumor necrosis factor levels	Prostate cancer	MR Egger	40.446	24	0.0191434
GCST90274839	Tumor necrosis factor levels	Prostate cancer	Inverse variance weighted	40.7871	25	0.0241684
GCST90274840	TNF-beta levels	Prostate cancer	MR Egger	15.2113	5	0.00949661
GCST90274840	TNF-beta levels	Prostate cancer	Inverse variance weighted	17.5616	6	0.00742655
GCST90274841	Tumor necrosis factor receptor superfamily member 9 levels	Prostate cancer	MR Egger	42.3578	30	0.0666743
GCST90274841	Tumor necrosis factor receptor superfamily member 9 levels	Prostate cancer	Inverse variance weighted	42.5289	31	0.0812784
GCST90274842	Tumor necrosis factor ligand superfamily member 14 levels	Prostate cancer	MR Egger	54.4262	36	0.0250585
GCST90274842	Tumor necrosis factor ligand superfamily member 14 levels	Prostate cancer	Inverse variance weighted	54.8548	37	0.0295527
GCST90274843	TNF-related apoptosis-inducing ligand levels	Prostate cancer	MR Egger	29.0201	35	0.751454
GCST90274843	TNF-related apoptosis-inducing ligand levels	Prostate cancer	Inverse variance weighted	29.0201	36	0.788926
GCST90274844	TNF-related activation-induced cytokine levels	Prostate cancer	MR Egger	74.9163	41	0.0009578
GCST90274844	TNF-related activation-induced cytokine levels	Prostate cancer	Inverse variance weighted	75.0654	42	0.00128696
GCST90274845	Thymic stromal lymphopoietin levels	Prostate cancer	MR Egger	39.6125	21	0.00828609
GCST90274845	Thymic stromal lymphopoietin levels	Prostate cancer	Inverse variance weighted	40.1871	22	0.0102802
GCST90274846	Tumor necrosis factor ligand superfamily member 12 levels	Prostate cancer	MR Egger	35.1564	39	0.645859
GCST90274846	Tumor necrosis factor ligand superfamily member 12 levels	Prostate cancer	Inverse variance weighted	35.6644	40	0.665724
GCST90274847	Urokinase-type plasminogen activator levels	Prostate cancer	MR Egger	67.829	41	0.00526249
GCST90274847	Urokinase-type plasminogen activator levels	Prostate cancer	Inverse variance weighted	68.0883	42	0.00661989
GCST90274848	Vascular endothelial growth factor A levels	Prostate cancer	MR Egger	18.9804	27	0.870714
GCST90274848	Vascular endothelial growth factor A levels	Prostate cancer	Inverse variance weighted	20.6554	28	0.839417
GCST90274758	Eukaryotic translation initiation factor 4E-binding protein 1 levels	Bladder cancer	MR Egger	16.4374	14	0.287398
GCST90274758	Eukaryotic translation initiation factor 4E-binding protein 1 levels	Bladder cancer	Inverse variance weighted	17.5822	15	0.285266
GCST90274759	Adenosine Deaminase levels	Bladder cancer	MR Egger	2.35641	2	0.307831
GCST90274759	Adenosine Deaminase levels	Bladder cancer	Inverse variance weighted	2.37463	3	0.498374
GCST90274760	Artemin levels	Bladder cancer	MR Egger	19.5886	28	0.878995
GCST90274760	Artemin levels	Bladder cancer	Inverse variance weighted	19.7149	29	0.901567
GCST90274761	Axin-1 levels	Bladder cancer	MR Egger	8.59378	10	0.571039
GCST90274761	Axin-1 levels	Bladder cancer	Inverse variance weighted	11.6664	11	0.389236
GCST90274762	beta-nerve growth factor levels	Bladder cancer	MR Egger	36.7014	29	0.154017
GCST90274762	beta-nerve growth factor levels	Bladder cancer	Inverse variance weighted	36.7319	30	0.185085
GCST90274763	Caspase 8 levels	Bladder cancer	MR Egger	21.9811	17	0.185445
GCST90274763	Caspase 8 levels	Bladder cancer	Inverse variance weighted	22.0883	18	0.228088
GCST90274764	Eotaxin levels	Bladder cancer	MR Egger	31.4403	24	0.141489
GCST90274764	Eotaxin levels	Bladder cancer	Inverse variance weighted	31.5029	25	0.172903
GCST90274765	C-C motif chemokine 19 levels	Bladder cancer	MR Egger	30.8695	34	0.621857
GCST90274765	C-C motif chemokine 19 levels	Bladder cancer	Inverse variance weighted	32.7783	35	0.5758
GCST90274766	C-C motif chemokine 20 levels	Bladder cancer	MR Egger	50.3226	30	0.0114782
GCST90274766	C-C motif chemokine 20 levels	Bladder cancer	Inverse variance weighted	50.3378	31	0.0154978
GCST90274767	C-C motif chemokine 23 levels	Bladder cancer	MR Egger	25.7034	32	0.776574
GCST90274767	C-C motif chemokine 23 levels	Bladder cancer	Inverse variance weighted	28.7938	33	0.676691
GCST90274768	C-C motif chemokine 25 levels	Bladder cancer	MR Egger	17.0737	14	0.252272
GCST90274768	C-C motif chemokine 25 levels	Bladder cancer	Inverse variance weighted	17.3588	15	0.297871
GCST90274769	C-C motif chemokine 28 levels	Bladder cancer	MR Egger	26.5064	32	0.740786
GCST90274769	C-C motif chemokine 28 levels	Bladder cancer	Inverse variance weighted	27.4982	33	0.737493
GCST90274770	C-C motif chemokine 4 levels	Bladder cancer	MR Egger	28.8837	27	0.366563
GCST90274770	C-C motif chemokine 4 levels	Bladder cancer	Inverse variance weighted	28.8845	28	0.418406
GCST90274771	Natural killer cell receptor 2B4 levels	Bladder cancer	MR Egger	30.0292	29	0.412545
GCST90274771	Natural killer cell receptor 2B4 levels	Bladder cancer	Inverse variance weighted	30.2305	30	0.453896
GCST90274772	CD40L receptor levels	Bladder cancer	MR Egger	39.3454	24	0.0251141
GCST90274772	CD40L receptor levels	Bladder cancer	Inverse variance weighted	39.8477	25	0.030232
GCST90274773	T-cell surface glycoprotein CD5 levels	Bladder cancer	MR Egger	24.7817	27	0.586693
GCST90274773	T-cell surface glycoprotein CD5 levels	Bladder cancer	Inverse variance weighted	25.3862	28	0.606744
GCST90274774	T-cell surface glycoprotein CD6 isoform levels	Bladder cancer	MR Egger	14.4555	6	0.0249417
GCST90274774	T-cell surface glycoprotein CD6 isoform levels	Bladder cancer	Inverse variance weighted	14.5813	7	0.0417575
GCST90274775	CUB domain-containing protein 1 levels	Bladder cancer	MR Egger	24.6409	30	0.74229
GCST90274775	CUB domain-containing protein 1 levels	Bladder cancer	Inverse variance weighted	24.8964	31	0.772331
GCST90274776	Macrophage colony-stimulating factor 1 levels	Bladder cancer	MR Egger	32.0639	26	0.191016
GCST90274776	Macrophage colony-stimulating factor 1 levels	Bladder cancer	Inverse variance weighted	32.1146	27	0.227866
GCST90274777	Cystatin D levels	Bladder cancer	MR Egger	19.4303	14	0.14915
GCST90274777	Cystatin D levels	Bladder cancer	Inverse variance weighted	19.6535	15	0.185633
GCST90274778	Fractalkine levels	Bladder cancer	MR Egger	28.5907	32	0.639863
GCST90274778	Fractalkine levels	Bladder cancer	Inverse variance weighted	29.0165	33	0.665874
GCST90274779	C-X-C motif chemokine 1 levels	Bladder cancer	MR Egger	23.279	23	0.444582
GCST90274779	C-X-C motif chemokine 1 levels	Bladder cancer	Inverse variance weighted	23.4289	24	0.494614
GCST90274780	C-X-C motif chemokine 10 levels	Bladder cancer	MR Egger	23.064	30	0.81262
GCST90274780	C-X-C motif chemokine 10 levels	Bladder cancer	Inverse variance weighted	23.6148	31	0.825944
GCST90274781	C-X-C motif chemokine 11 levels	Bladder cancer	MR Egger	32.3289	33	0.50034
GCST90274781	C-X-C motif chemokine 11 levels	Bladder cancer	Inverse variance weighted	34.0773	34	0.464023
GCST90274782	C-X-C motif chemokine 5 levels	Bladder cancer	MR Egger	26.3226	20	0.15542
GCST90274782	C-X-C motif chemokine 5 levels	Bladder cancer	Inverse variance weighted	26.7864	21	0.178037
GCST90274783	C-X-C motif chemokine 6 levels	Bladder cancer	MR Egger	5.14849	4	0.272398
GCST90274783	C-X-C motif chemokine 6 levels	Bladder cancer	Inverse variance weighted	5.14946	5	0.397914
GCST90274784	C-X-C motif chemokine 9 levels	Bladder cancer	MR Egger	25.2825	31	0.754938
GCST90274784	C-X-C motif chemokine 9 levels	Bladder cancer	Inverse variance weighted	25.3763	32	0.790508
GCST90274785	Delta and Notch-like epidermal growth factor-related receptor levels	Bladder cancer	MR Egger	14.8418	24	0.925301
GCST90274785	Delta and Notch-like epidermal growth factor-related receptor levels	Bladder cancer	Inverse variance weighted	15.4772	25	0.929511
GCST90274786	Protein S100-A12 levels	Bladder cancer	MR Egger	28.7239	23	0.189638
GCST90274786	Protein S100-A12 levels	Bladder cancer	Inverse variance weighted	28.8956	24	0.224084
GCST90274787	Fibroblast growth factor 19 levels	Bladder cancer	MR Egger	26.4537	30	0.651787
GCST90274787	Fibroblast growth factor 19 levels	Bladder cancer	Inverse variance weighted	31.561	31	0.438217
GCST90274788	Fibroblast growth factor 21 levels	Bladder cancer	MR Egger	22.3809	24	0.556546
GCST90274788	Fibroblast growth factor 21 levels	Bladder cancer	Inverse variance weighted	22.5784	25	0.602169
GCST90274789	Fibroblast growth factor 23 levels	Bladder cancer	MR Egger	28.2334	26	0.347067
GCST90274789	Fibroblast growth factor 23 levels	Bladder cancer	Inverse variance weighted	28.4824	27	0.386434
GCST90274790	Fibroblast growth factor 5 levels	Bladder cancer	MR Egger	2.64716	5	0.754187
GCST90274790	Fibroblast growth factor 5 levels	Bladder cancer	Inverse variance weighted	4.14438	6	0.657145
GCST90274791	Fms-related tyrosine kinase 3 ligand levels	Bladder cancer	MR Egger	55.0189	43	0.103432
GCST90274791	Fms-related tyrosine kinase 3 ligand levels	Bladder cancer	Inverse variance weighted	57.5154	44	0.083093
GCST90274792	Glial cell line-derived neurotrophic factor levels	Bladder cancer	MR Egger	18.2159	24	0.792409
GCST90274792	Glial cell line-derived neurotrophic factor levels	Bladder cancer	Inverse variance weighted	18.2819	25	0.830193
GCST90274793	Hepatocyte growth factor levels	Bladder cancer	MR Egger	21.5552	26	0.712768
GCST90274793	Hepatocyte growth factor levels	Bladder cancer	Inverse variance weighted	22.1223	27	0.731136
GCST90274794	Interferon gamma levels	Bladder cancer	MR Egger	12.1255	18	0.840692
GCST90274794	Interferon gamma levels	Bladder cancer	Inverse variance weighted	14.3921	19	0.760375
GCST90274795	Interleukin-10 levels	Bladder cancer	MR Egger	35.5274	30	0.223958
GCST90274795	Interleukin-10 levels	Bladder cancer	Inverse variance weighted	37.1372	31	0.20705
GCST90274796	Interleukin-10 receptor subunit alpha levels	Bladder cancer	MR Egger	15.5356	18	0.624919
GCST90274796	Interleukin-10 receptor subunit alpha levels	Bladder cancer	Inverse variance weighted	17.2209	19	0.574907
GCST90274797	Interleukin-10 receptor subunit beta levels	Bladder cancer	MR Egger	20.2211	25	0.735132
GCST90274797	Interleukin-10 receptor subunit beta levels	Bladder cancer	Inverse variance weighted	20.688	26	0.757885
GCST90274798	Interleukin-12 subunit beta levels	Bladder cancer	MR Egger	23.0978	18	0.186859
GCST90274798	Interleukin-12 subunit beta levels	Bladder cancer	Inverse variance weighted	25.1108	19	0.156926
GCST90274799	Interleukin-13 levels	Bladder cancer	MR Egger	36.2106	27	0.11077
GCST90274799	Interleukin-13 levels	Bladder cancer	Inverse variance weighted	43.3216	28	0.0323919
GCST90274800	Interleukin-15 receptor subunit alpha levels	Bladder cancer	MR Egger	9.12315	21	0.988212
GCST90274800	Interleukin-15 receptor subunit alpha levels	Bladder cancer	Inverse variance weighted	9.86749	22	0.987467
GCST90274801	Interleukin-17A levels	Bladder cancer	MR Egger	29.3432	19	0.0607746
GCST90274801	Interleukin-17A levels	Bladder cancer	Inverse variance weighted	29.4693	20	0.0789212
GCST90274802	Interleukin-17C levels	Bladder cancer	MR Egger	34.0545	34	0.465118
GCST90274802	Interleukin-17C levels	Bladder cancer	Inverse variance weighted	34.5176	35	0.491242
GCST90274803	Interleukin-18 levels	Bladder cancer	MR Egger	21.4516	28	0.806026
GCST90274803	Interleukin-18 levels	Bladder cancer	Inverse variance weighted	21.6443	29	0.834617
GCST90274804	interleukin-18 receptor 1 levels	Bladder cancer	MR Egger	11.0559	7	0.136199
GCST90274804	interleukin-18 receptor 1 levels	Bladder cancer	Inverse variance weighted	11.1489	8	0.193403
GCST90274805	Interleukin-1-alpha levels	Bladder cancer	MR Egger	14.1241	20	0.824146
GCST90274805	Interleukin-1-alpha levels	Bladder cancer	Inverse variance weighted	14.7773	21	0.833957
GCST90274806	Interleukin-2 levels	Bladder cancer	MR Egger	11.7502	18	0.859862
GCST90274806	Interleukin-2 levels	Bladder cancer	Inverse variance weighted	12.3154	19	0.871706
GCST90274807	Interleukin-20 levels	Bladder cancer	MR Egger	31.8842	21	0.0601489
GCST90274807	Interleukin-20 levels	Bladder cancer	Inverse variance weighted	33.5426	22	0.054638
GCST90274808	Interleukin-20 receptor subunit alpha levels	Bladder cancer	MR Egger	21.8223	19	0.293187
GCST90274808	Interleukin-20 receptor subunit alpha levels	Bladder cancer	Inverse variance weighted	24.6881	20	0.213624
GCST90274809	Interleukin-22 receptor subunit alpha-1 levels	Bladder cancer	MR Egger	26.7924	19	0.109583
GCST90274809	Interleukin-22 receptor subunit alpha-1 levels	Bladder cancer	Inverse variance weighted	27.4634	20	0.122722
GCST90274810	Interleukin-24 levels	Bladder cancer	MR Egger	19.6816	16	0.234903
GCST90274810	Interleukin-24 levels	Bladder cancer	Inverse variance weighted	19.902	17	0.279273
GCST90274811	Interleukin-2 receptor subunit beta levels	Bladder cancer	MR Egger	13.9107	20	0.834994
GCST90274811	Interleukin-2 receptor subunit beta levels	Bladder cancer	Inverse variance weighted	13.911	21	0.873393
GCST90274812	Interleukin-33 levels	Bladder cancer	MR Egger	16.28	22	0.801751
GCST90274812	Interleukin-33 levels	Bladder cancer	Inverse variance weighted	16.3594	23	0.839458
GCST90274813	Interleukin-4 levels	Bladder cancer	MR Egger	14.676	19	0.742956
GCST90274813	Interleukin-4 levels	Bladder cancer	Inverse variance weighted	15.4193	20	0.751933
GCST90274814	Interleukin-5 levels	Bladder cancer	MR Egger	13.0168	19	0.837712
GCST90274814	Interleukin-5 levels	Bladder cancer	Inverse variance weighted	13.0315	20	0.876029
GCST90274815	Interleukin-6 levels	Bladder cancer	MR Egger	7.69343	11	0.740474
GCST90274815	Interleukin-6 levels	Bladder cancer	Inverse variance weighted	9.23963	12	0.682338
GCST90274816	Interleukin-7 levels	Bladder cancer	MR Egger	10.7093	21	0.968154
GCST90274816	Interleukin-7 levels	Bladder cancer	Inverse variance weighted	14.4461	22	0.884895
GCST90274817	Interleukin-8 levels	Bladder cancer	MR Egger	21.5564	27	0.759561
GCST90274817	Interleukin-8 levels	Bladder cancer	Inverse variance weighted	24.6591	28	0.646322
GCST90274818	Latency-associated peptide transforming growth factor beta 1 levels	Bladder cancer	MR Egger	30.06	30	0.462582
GCST90274818	Latency-associated peptide transforming growth factor beta 1 levels	Bladder cancer	Inverse variance weighted	30.0977	31	0.512257
GCST90274819	Leukemia inhibitory factor levels	Bladder cancer	MR Egger	23.801	27	0.64133
GCST90274819	Leukemia inhibitory factor levels	Bladder cancer	Inverse variance weighted	26.0498	28	0.570306
GCST90274820	Leukemia inhibitory factor receptor levels	Bladder cancer	MR Egger	23.8411	26	0.585052
GCST90274820	Leukemia inhibitory factor receptor levels	Bladder cancer	Inverse variance weighted	24.4383	27	0.605907
GCST90274821	Monocyte chemoattractant protein-1 levels	Bladder cancer	MR Egger	23.8206	27	0.640248
GCST90274821	Monocyte chemoattractant protein-1 levels	Bladder cancer	Inverse variance weighted	24.7269	28	0.642658
GCST90274822	Monocyte chemoattractant protein 2 levels	Bladder cancer	MR Egger	4.65994	5	0.458773
GCST90274822	Monocyte chemoattractant protein 2 levels	Bladder cancer	Inverse variance weighted	4.66525	6	0.587406
GCST90274823	Monocyte chemoattractant protein-3 levels	Bladder cancer	MR Egger	29.1935	24	0.212933
GCST90274823	Monocyte chemoattractant protein-3 levels	Bladder cancer	Inverse variance weighted	30.5301	25	0.205051
GCST90274824	Monocyte chemoattractant protein-4 levels	Bladder cancer	MR Egger	23.5117	27	0.657244
GCST90274824	Monocyte chemoattractant protein-4 levels	Bladder cancer	Inverse variance weighted	24.2255	28	0.669577
GCST90274825	Macrophage inflammatory protein 1a levels	Bladder cancer	MR Egger	25.3272	18	0.116165
GCST90274825	Macrophage inflammatory protein 1a levels	Bladder cancer	Inverse variance weighted	25.3308	19	0.149939
GCST90274826	Matrix metalloproteinase-1 levels	Bladder cancer	MR Egger	23.6876	24	0.479571
GCST90274826	Matrix metalloproteinase-1 levels	Bladder cancer	Inverse variance weighted	23.7502	25	0.533843
GCST90274827	Matrix metalloproteinase-10 levels	Bladder cancer	MR Egger	23.3082	21	0.327768
GCST90274827	Matrix metalloproteinase-10 levels	Bladder cancer	Inverse variance weighted	24.4906	22	0.32205
GCST90274828	Neurturin levels	Bladder cancer	MR Egger	20.357	21	0.498758
GCST90274828	Neurturin levels	Bladder cancer	Inverse variance weighted	20.7182	22	0.538207
GCST90274829	Neurotrophin-3 levels	Bladder cancer	MR Egger	24.5461	28	0.652413
GCST90274829	Neurotrophin-3 levels	Bladder cancer	Inverse variance weighted	24.6205	29	0.697781
GCST90274830	Osteoprotegerin levels	Bladder cancer	MR Egger	63.1989	28	0.000156472
GCST90274830	Osteoprotegerin levels	Bladder cancer	Inverse variance weighted	63.2816	29	0.000237168
GCST90274831	Oncostatin-M levels	Bladder cancer	MR Egger	22.4465	21	0.374182
GCST90274831	Oncostatin-M levels	Bladder cancer	Inverse variance weighted	27.0102	22	0.210839
GCST90274832	Programmed cell death 1 ligand 1 levels	Bladder cancer	MR Egger	27.3828	28	0.497486
GCST90274832	Programmed cell death 1 ligand 1 levels	Bladder cancer	Inverse variance weighted	27.5642	29	0.541291
GCST90274833	Stem cell factor levels	Bladder cancer	MR Egger	54.1364	44	0.140725
GCST90274833	Stem cell factor levels	Bladder cancer	Inverse variance weighted	54.1774	45	0.164109
GCST90274834	SIR2-like protein 2 levels	Bladder cancer	MR Egger	11.2008	17	0.845936
GCST90274834	SIR2-like protein 2 levels	Bladder cancer	Inverse variance weighted	11.2487	18	0.883508
GCST90274835	Signaling lymphocytic activation molecule levels	Bladder cancer	MR Egger	32.5247	36	0.634664
GCST90274835	Signaling lymphocytic activation molecule levels	Bladder cancer	Inverse variance weighted	32.8035	37	0.666129
GCST90274836	Sulfotransferase 1A1 levels	Bladder cancer	MR Egger	22.4017	29	0.803183
GCST90274836	Sulfotransferase 1A1 levels	Bladder cancer	Inverse variance weighted	31.8952	30	0.372417
GCST90274837	STAM binding protein levels	Bladder cancer	MR Egger	9.02953	19	0.972986
GCST90274837	STAM binding protein levels	Bladder cancer	Inverse variance weighted	9.4215	20	0.977491
GCST90274838	Transforming growth factor-alpha levels	Bladder cancer	MR Egger	24.9217	24	0.410023
GCST90274838	Transforming growth factor-alpha levels	Bladder cancer	Inverse variance weighted	26.978	25	0.356985
GCST90274839	Tumor necrosis factor levels	Bladder cancer	MR Egger	21.0432	27	0.784263
GCST90274839	Tumor necrosis factor levels	Bladder cancer	Inverse variance weighted	21.6931	28	0.795298
GCST90274840	TNF-beta levels	Bladder cancer	MR Egger	8.7864	6	0.185952
GCST90274840	TNF-beta levels	Bladder cancer	Inverse variance weighted	8.81117	7	0.266499
GCST90274841	Tumor necrosis factor receptor superfamily member 9 levels	Bladder cancer	MR Egger	33.0612	32	0.415104
GCST90274841	Tumor necrosis factor receptor superfamily member 9 levels	Bladder cancer	Inverse variance weighted	33.3017	33	0.452581
GCST90274842	Tumor necrosis factor ligand superfamily member 14 levels	Bladder cancer	MR Egger	31.2095	34	0.605114
GCST90274842	Tumor necrosis factor ligand superfamily member 14 levels	Bladder cancer	Inverse variance weighted	31.2262	35	0.650934
GCST90274843	TNF-related apoptosis-inducing ligand levels	Bladder cancer	MR Egger	28.6198	33	0.685075
GCST90274843	TNF-related apoptosis-inducing ligand levels	Bladder cancer	Inverse variance weighted	28.8129	34	0.719777
GCST90274844	TNF-related activation-induced cytokine levels	Bladder cancer	MR Egger	36.0308	45	0.827712
GCST90274844	TNF-related activation-induced cytokine levels	Bladder cancer	Inverse variance weighted	36.1499	46	0.850862
GCST90274845	Thymic stromal lymphopoietin levels	Bladder cancer	MR Egger	17.637	22	0.727281
GCST90274845	Thymic stromal lymphopoietin levels	Bladder cancer	Inverse variance weighted	18.7351	23	0.716489
GCST90274846	Tumor necrosis factor ligand superfamily member 12 levels	Bladder cancer	MR Egger	41.7146	37	0.273194
GCST90274846	Tumor necrosis factor ligand superfamily member 12 levels	Bladder cancer	Inverse variance weighted	41.7222	38	0.312162
GCST90274847	Urokinase-type plasminogen activator levels	Bladder cancer	MR Egger	52.9643	43	0.141896
GCST90274847	Urokinase-type plasminogen activator levels	Bladder cancer	Inverse variance weighted	54.5457	44	0.132431
GCST90274848	Vascular endothelial growth factor A levels	Bladder cancer	MR Egger	23.4112	30	0.797987
GCST90274848	Vascular endothelial growth factor A levels	Bladder cancer	Inverse variance weighted	25.4716	31	0.746237
