# Supplementary material for: Genetically predicted 91 circulating inflammatory proteins in relation to risk of urological malignancies: a Mendelian randomization study
Source: Aging (Albany NY). 2024 Jun 13;16(12):10366–79. doi: 10.18632/aging.205934 (PMC11236305; doi:10.18632/aging.205934)
Supplement: Supplementary Table 5 [file aging-16-205934-s006.xlsx]

## Sheet: Sheet1
Supplement Table 5. The results of pleiotropy test for 91 plasma proteins on Kca, Bca, Pca.
id.exposure	exposure	outcome	egger_intercept	se	pval
GCST90274758	Eukaryotic translation initiation factor 4E-binding protein 1 levels	kidney cancer	-0.020228	0.0422133	0.638717
GCST90274759	Adenosine Deaminase levels	kidney cancer	-0.0496104	0.0763753	0.562276
GCST90274760	Artemin levels	kidney cancer	0.0666957	0.0297746	0.0335207
GCST90274761	Axin-1 levels	kidney cancer	0.0553133	0.0432693	0.229999
GCST90274762	beta-nerve growth factor levels	kidney cancer	0.000493	0.0285295	0.986324
GCST90274763	Caspase 8 levels	kidney cancer	0.0104668	0.0312013	0.741156
GCST90274764	Eotaxin levels	kidney cancer	-0.00317502	0.0262975	0.904906
GCST90274765	C-C motif chemokine 19 levels	kidney cancer	0.0221975	0.0228993	0.339639
GCST90274766	C-C motif chemokine 20 levels	kidney cancer	0.0363925	0.0265355	0.18075
GCST90274767	C-C motif chemokine 23 levels	kidney cancer	-0.0276509	0.0178989	0.131923
GCST90274768	C-C motif chemokine 25 levels	kidney cancer	-0.0296034	0.0268727	0.290606
GCST90274769	C-C motif chemokine 28 levels	kidney cancer	-0.0168471	0.0272261	0.540306
GCST90274770	C-C motif chemokine 4 levels	kidney cancer	0.0147423	0.0186378	0.4356
GCST90274771	Natural killer cell receptor 2B4 levels	kidney cancer	-0.0412993	0.0219482	0.0699531
GCST90274772	CD40L receptor levels	kidney cancer	0.0172521	0.016714	0.313198
GCST90274773	T-cell surface glycoprotein CD5 levels	kidney cancer	0.0344223	0.0317057	0.287978
GCST90274774	T-cell surface glycoprotein CD6 isoform levels	kidney cancer	0.0327673	0.0212487	0.173992
GCST90274775	CUB domain-containing protein 1 levels	kidney cancer	0.033148	0.0188569	0.0889691
GCST90274776	Macrophage colony-stimulating factor 1 levels	kidney cancer	-0.0114248	0.0268787	0.674168
GCST90274777	Cystatin D levels	kidney cancer	-0.00407157	0.0193227	0.836378
GCST90274778	Fractalkine levels	kidney cancer	-0.0404704	0.0322515	0.218917
GCST90274779	C-X-C motif chemokine 1 levels	kidney cancer	-0.0141602	0.0222034	0.529675
GCST90274780	C-X-C motif chemokine 10 levels	kidney cancer	0.0459119	0.0232351	0.0580863
GCST90274781	C-X-C motif chemokine 11 levels	kidney cancer	-0.00280268	0.0254184	0.912814
GCST90274782	C-X-C motif chemokine 5 levels	kidney cancer	0.0116291	0.0173253	0.50976
GCST90274783	C-X-C motif chemokine 6 levels	kidney cancer	-0.0537588	0.0345085	0.194269
GCST90274784	C-X-C motif chemokine 9 levels	kidney cancer	0.0161537	0.0225515	0.478557
GCST90274785	Delta and Notch-like epidermal growth factor-related receptor levels	kidney cancer	0.000700085	0.0240851	0.977033
GCST90274786	Protein S100-A12 levels	kidney cancer	0.0326721	0.0291873	0.275612
GCST90274787	Fibroblast growth factor 19 levels	kidney cancer	-0.0293475	0.0323335	0.370847
GCST90274788	Fibroblast growth factor 21 levels	kidney cancer	-0.00588671	0.0271198	0.830159
GCST90274789	Fibroblast growth factor 23 levels	kidney cancer	0.0150687	0.0295996	0.615158
GCST90274790	Fibroblast growth factor 5 levels	kidney cancer	0.0189652	0.0477693	0.711627
GCST90274791	Fms-related tyrosine kinase 3 ligand levels	kidney cancer	0.0111988	0.0163133	0.496183
GCST90274792	Glial cell line-derived neurotrophic factor levels	kidney cancer	-0.0180323	0.0262013	0.498508
GCST90274793	Hepatocyte growth factor levels	kidney cancer	0.0117967	0.0317994	0.713913
GCST90274794	Interferon gamma levels	kidney cancer	0.0295828	0.0341701	0.39868
GCST90274795	Interleukin-10 levels	kidney cancer	0.00423622	0.0274602	0.878432
GCST90274796	Interleukin-10 receptor subunit alpha levels	kidney cancer	0.024827	0.0352388	0.491228
GCST90274797	Interleukin-10 receptor subunit beta levels	kidney cancer	0.00415883	0.0167218	0.805619
GCST90274798	Interleukin-12 subunit beta levels	kidney cancer	-0.00512045	0.0209704	0.809856
GCST90274799	Interleukin-13 levels	kidney cancer	0.0326198	0.0267151	0.231585
GCST90274800	Interleukin-15 receptor subunit alpha levels	kidney cancer	0.00225088	0.0234833	0.924549
GCST90274801	Interleukin-17A levels	kidney cancer	0.0569555	0.0392297	0.163753
GCST90274802	Interleukin-17C levels	kidney cancer	-0.0174432	0.0247439	0.485642
GCST90274803	Interleukin-18 levels	kidney cancer	-0.0128593	0.0227008	0.575433
GCST90274804	interleukin-18 receptor 1 levels	kidney cancer	-0.0244126	0.0508843	0.646022
GCST90274805	Interleukin-1-alpha levels	kidney cancer	-0.00411818	0.0334339	0.903263
GCST90274806	Interleukin-2 levels	kidney cancer	-0.0777251	0.0359927	0.0445548
GCST90274807	Interleukin-20 levels	kidney cancer	-0.0440337	0.0385175	0.266451
GCST90274808	Interleukin-20 receptor subunit alpha levels	kidney cancer	0.012474	0.0368314	0.738566
GCST90274809	Interleukin-22 receptor subunit alpha-1 levels	kidney cancer	0.0130827	0.0378936	0.734405
GCST90274810	Interleukin-24 levels	kidney cancer	-0.00252366	0.0317492	0.937522
GCST90274811	Interleukin-2 receptor subunit beta levels	kidney cancer	0.0086286	0.0338296	0.801158
GCST90274812	Interleukin-33 levels	kidney cancer	0.0375612	0.038233	0.337625
GCST90274813	Interleukin-4 levels	kidney cancer	0.0140149	0.0362334	0.703205
GCST90274814	Interleukin-5 levels	kidney cancer	0.0239705	0.0355819	0.507537
GCST90274815	Interleukin-6 levels	kidney cancer	0.0209519	0.0379806	0.593301
GCST90274816	Interleukin-7 levels	kidney cancer	0.0284831	0.0327913	0.394875
GCST90274817	Interleukin-8 levels	kidney cancer	0.00961483	0.0306829	0.75683
GCST90274818	Latency-associated peptide transforming growth factor beta 1 levels	kidney cancer	0.0405193	0.0209516	0.0622944
GCST90274819	Leukemia inhibitory factor levels	kidney cancer	0.00961527	0.0304735	0.754979
GCST90274820	Leukemia inhibitory factor receptor levels	kidney cancer	0.0170282	0.0200665	0.404162
GCST90274821	Monocyte chemoattractant protein-1 levels	kidney cancer	-0.00302932	0.0230568	0.896522
GCST90274822	Monocyte chemoattractant protein 2 levels	kidney cancer	-0.00704717	0.0696721	0.924301
GCST90274823	Monocyte chemoattractant protein-3 levels	kidney cancer	-0.00838095	0.0304002	0.785054
GCST90274824	Monocyte chemoattractant protein-4 levels	kidney cancer	0.00123704	0.0240109	0.959321
GCST90274825	Macrophage inflammatory protein 1a levels	kidney cancer	0.0275903	0.0196896	0.178141
GCST90274826	Matrix metalloproteinase-1 levels	kidney cancer	0.0122468	0.0260434	0.642256
GCST90274827	Matrix metalloproteinase-10 levels	kidney cancer	0.000553407	0.0204727	0.978668
GCST90274828	Neurturin levels	kidney cancer	-0.00502862	0.0280009	0.859198
GCST90274829	Neurotrophin-3 levels	kidney cancer	0.00575762	0.0357677	0.873271
GCST90274830	Osteoprotegerin levels	kidney cancer	0.00784546	0.0330795	0.814252
GCST90274831	Oncostatin-M levels	kidney cancer	-0.00440445	0.0303938	0.88623
GCST90274832	Programmed cell death 1 ligand 1 levels	kidney cancer	-0.0107353	0.026321	0.686715
GCST90274833	Stem cell factor levels	kidney cancer	-0.0287343	0.0175414	0.108876
GCST90274834	SIR2-like protein 2 levels	kidney cancer	0.0893318	0.0538494	0.119358
GCST90274835	Signaling lymphocytic activation molecule levels	kidney cancer	0.019093	0.0191795	0.325965
GCST90274836	Sulfotransferase 1A1 levels	kidney cancer	0.0829692	0.0255444	0.00293425
GCST90274837	STAM binding protein levels	kidney cancer	0.0172492	0.0456039	0.709446
GCST90274838	Transforming growth factor-alpha levels	kidney cancer	0.00455632	0.0345634	0.896378
GCST90274839	Tumor necrosis factor levels	kidney cancer	0.00296511	0.0327231	0.928553
GCST90274840	TNF-beta levels	kidney cancer	-0.0204632	0.032647	0.550676
GCST90274841	Tumor necrosis factor receptor superfamily member 9 levels	kidney cancer	-0.0492863	0.0248284	0.0566662
GCST90274842	Tumor necrosis factor ligand superfamily member 14 levels	kidney cancer	-0.00528371	0.01786	0.769151
GCST90274843	TNF-related apoptosis-inducing ligand levels	kidney cancer	-0.013587	0.0200638	0.503007
GCST90274844	TNF-related activation-induced cytokine levels	kidney cancer	0.00614847	0.0191141	0.749127
GCST90274845	Thymic stromal lymphopoietin levels	kidney cancer	-0.00205628	0.0337479	0.951991
GCST90274846	Tumor necrosis factor ligand superfamily member 12 levels	kidney cancer	-0.00375106	0.0207081	0.857196
GCST90274847	Urokinase-type plasminogen activator levels	kidney cancer	-0.0366433	0.0212745	0.0929192
GCST90274848	Vascular endothelial growth factor A levels	kidney cancer	0.000446448	0.0194302	0.981821
GCST90274758	Eukaryotic translation initiation factor 4E-binding protein 1 levels	Prostate cancer	0.00871571	0.00782993	0.283175
GCST90274759	Adenosine Deaminase levels	Prostate cancer	0.0134095	0.00836491	0.250102
GCST90274760	Artemin levels	Prostate cancer	-0.00527521	0.00524534	0.323176
GCST90274761	Axin-1 levels	Prostate cancer	0.0157898	0.0113042	0.192697
GCST90274762	beta-nerve growth factor levels	Prostate cancer	0.00278484	0.00696728	0.692207
GCST90274763	Caspase 8 levels	Prostate cancer	-0.0123973	0.00715916	0.0987301
GCST90274764	Eotaxin levels	Prostate cancer	0.00292816	0.00631519	0.64744
GCST90274765	C-C motif chemokine 19 levels	Prostate cancer	0.00047232	0.00498511	0.925042
GCST90274766	C-C motif chemokine 20 levels	Prostate cancer	0.0030062	0.00650562	0.648176
GCST90274767	C-C motif chemokine 23 levels	Prostate cancer	-0.000875229	0.0036526	0.812155
GCST90274768	C-C motif chemokine 25 levels	Prostate cancer	-0.00778323	0.00556078	0.185022
GCST90274769	C-C motif chemokine 28 levels	Prostate cancer	0.000988172	0.00558809	0.860719
GCST90274770	C-C motif chemokine 4 levels	Prostate cancer	-0.0035303	0.0045846	0.44822
GCST90274771	Natural killer cell receptor 2B4 levels	Prostate cancer	0.00242447	0.00585469	0.681951
GCST90274772	CD40L receptor levels	Prostate cancer	0.00130969	0.00346252	0.708871
GCST90274773	T-cell surface glycoprotein CD5 levels	Prostate cancer	0.010524	0.007332	0.162671
GCST90274774	T-cell surface glycoprotein CD6 isoform levels	Prostate cancer	-0.00138621	0.00547962	0.810359
GCST90274775	CUB domain-containing protein 1 levels	Prostate cancer	-0.00206433	0.00411469	0.619425
GCST90274776	Macrophage colony-stimulating factor 1 levels	Prostate cancer	-0.00610052	0.00596962	0.315885
GCST90274777	Cystatin D levels	Prostate cancer	0.00376958	0.00500666	0.463975
GCST90274778	Fractalkine levels	Prostate cancer	0.00725635	0.00623923	0.254637
GCST90274779	C-X-C motif chemokine 1 levels	Prostate cancer	0.00131578	0.00406445	0.7492
GCST90274780	C-X-C motif chemokine 10 levels	Prostate cancer	-0.00137031	0.00582904	0.816224
GCST90274781	C-X-C motif chemokine 11 levels	Prostate cancer	-0.000824543	0.00668475	0.902581
GCST90274782	C-X-C motif chemokine 5 levels	Prostate cancer	9.89241e-05	0.00487267	0.984026
GCST90274783	C-X-C motif chemokine 6 levels	Prostate cancer	-0.00385769	0.0139739	0.800424
GCST90274784	C-X-C motif chemokine 9 levels	Prostate cancer	-0.00410013	0.00605324	0.503212
GCST90274785	Delta and Notch-like epidermal growth factor-related receptor levels	Prostate cancer	-0.00617397	0.00492019	0.221147
GCST90274786	Protein S100-A12 levels	Prostate cancer	0.0168158	0.00841181	0.0587071
GCST90274787	Fibroblast growth factor 19 levels	Prostate cancer	-0.00276176	0.00865955	0.752068
GCST90274788	Fibroblast growth factor 21 levels	Prostate cancer	-0.0126223	0.00595892	0.0456885
GCST90274789	Fibroblast growth factor 23 levels	Prostate cancer	-0.000950878	0.00647848	0.884779
GCST90274790	Fibroblast growth factor 5 levels	Prostate cancer	0.0143973	0.0198516	0.520754
GCST90274791	Fms-related tyrosine kinase 3 ligand levels	Prostate cancer	-0.00510458	0.00418631	0.230035
GCST90274792	Glial cell line-derived neurotrophic factor levels	Prostate cancer	-0.00443964	0.00578902	0.450937
GCST90274793	Hepatocyte growth factor levels	Prostate cancer	-0.00219602	0.00860566	0.800515
GCST90274794	Interferon gamma levels	Prostate cancer	-0.00158493	0.00616452	0.800184
GCST90274795	Interleukin-10 levels	Prostate cancer	-0.000482149	0.00515603	0.92614
GCST90274796	Interleukin-10 receptor subunit alpha levels	Prostate cancer	-0.00210409	0.00813455	0.798831
GCST90274797	Interleukin-10 receptor subunit beta levels	Prostate cancer	0.00592543	0.00392636	0.144316
GCST90274798	Interleukin-12 subunit beta levels	Prostate cancer	-0.00194352	0.00723371	0.792396
GCST90274799	Interleukin-13 levels	Prostate cancer	0.00189909	0.00515292	0.715238
GCST90274800	Interleukin-15 receptor subunit alpha levels	Prostate cancer	0.00434246	0.00524951	0.417878
GCST90274801	Interleukin-17A levels	Prostate cancer	-0.00321344	0.00910696	0.728081
GCST90274802	Interleukin-17C levels	Prostate cancer	0.00808379	0.00539079	0.143236
GCST90274803	Interleukin-18 levels	Prostate cancer	0.00012365	0.00560869	0.982579
GCST90274804	interleukin-18 receptor 1 levels	Prostate cancer	-0.0245777	0.00988053	0.0376695
GCST90274805	Interleukin-1-alpha levels	Prostate cancer	0.00960286	0.00634468	0.143767
GCST90274806	Interleukin-2 levels	Prostate cancer	-0.0140058	0.00801133	0.0974547
GCST90274807	Interleukin-20 levels	Prostate cancer	0.00411175	0.0110363	0.713594
GCST90274808	Interleukin-20 receptor subunit alpha levels	Prostate cancer	-0.00896791	0.00882866	0.324852
GCST90274809	Interleukin-22 receptor subunit alpha-1 levels	Prostate cancer	-0.0126898	0.00842839	0.151656
GCST90274810	Interleukin-24 levels	Prostate cancer	-0.0150535	0.00699129	0.0469046
GCST90274811	Interleukin-2 receptor subunit beta levels	Prostate cancer	-0.00335851	0.00772195	0.669084
GCST90274812	Interleukin-33 levels	Prostate cancer	-0.00140067	0.00807882	0.864403
GCST90274813	Interleukin-4 levels	Prostate cancer	-0.00186048	0.00789865	0.816181
GCST90274814	Interleukin-5 levels	Prostate cancer	0.0145142	0.00673733	0.044263
GCST90274815	Interleukin-6 levels	Prostate cancer	-0.0174321	0.00967325	0.0989694
GCST90274816	Interleukin-7 levels	Prostate cancer	-0.0110804	0.00915386	0.242663
GCST90274817	Interleukin-8 levels	Prostate cancer	0.0066455	0.00557871	0.243932
GCST90274818	Latency-associated peptide transforming growth factor beta 1 levels	Prostate cancer	-0.00648043	0.00541153	0.241511
GCST90274819	Leukemia inhibitory factor levels	Prostate cancer	-0.0028993	0.00539057	0.595635
GCST90274820	Leukemia inhibitory factor receptor levels	Prostate cancer	0.00650263	0.00461058	0.170752
GCST90274821	Monocyte chemoattractant protein-1 levels	Prostate cancer	-0.000372166	0.00502271	0.94148
GCST90274822	Monocyte chemoattractant protein 2 levels	Prostate cancer	-0.0435853	0.0269385	0.204101
GCST90274823	Monocyte chemoattractant protein-3 levels	Prostate cancer	0.0038848	0.00615144	0.533665
GCST90274824	Monocyte chemoattractant protein-4 levels	Prostate cancer	-0.0015502	0.0057906	0.790817
GCST90274825	Macrophage inflammatory protein 1a levels	Prostate cancer	-0.0135389	0.00507717	0.0168864
GCST90274826	Matrix metalloproteinase-1 levels	Prostate cancer	-0.00889282	0.00719577	0.230164
GCST90274827	Matrix metalloproteinase-10 levels	Prostate cancer	-0.00172455	0.00536861	0.751213
GCST90274828	Neurturin levels	Prostate cancer	-0.00348341	0.00577142	0.552599
GCST90274829	Neurotrophin-3 levels	Prostate cancer	0.00299433	0.00595716	0.619614
GCST90274830	Osteoprotegerin levels	Prostate cancer	-0.00525209	0.00635687	0.417176
GCST90274831	Oncostatin-M levels	Prostate cancer	-0.00163014	0.00749514	0.830027
GCST90274832	Programmed cell death 1 ligand 1 levels	Prostate cancer	-0.000273703	0.00716848	0.969887
GCST90274833	Stem cell factor levels	Prostate cancer	0.00575258	0.00375042	0.132392
GCST90274834	SIR2-like protein 2 levels	Prostate cancer	-0.00400218	0.00651469	0.546684
GCST90274835	Signaling lymphocytic activation molecule levels	Prostate cancer	-0.00313312	0.00613804	0.613476
GCST90274836	Sulfotransferase 1A1 levels	Prostate cancer	0.0101983	0.00594456	0.0972888
GCST90274837	STAM binding protein levels	Prostate cancer	-0.00993048	0.0101679	0.341013
GCST90274838	Transforming growth factor-alpha levels	Prostate cancer	-0.0128168	0.0066646	0.0669316
GCST90274839	Tumor necrosis factor levels	Prostate cancer	-0.00314364	0.00698763	0.65683
GCST90274840	TNF-beta levels	Prostate cancer	0.0116992	0.0133105	0.419661
GCST90274841	Tumor necrosis factor receptor superfamily member 9 levels	Prostate cancer	-0.00215658	0.00619548	0.730204
GCST90274842	Tumor necrosis factor ligand superfamily member 14 levels	Prostate cancer	0.00234697	0.00440748	0.597653
GCST90274843	TNF-related apoptosis-inducing ligand levels	Prostate cancer	1.79167e-05	0.00393501	0.996393
GCST90274844	TNF-related activation-induced cytokine levels	Prostate cancer	-0.00152843	0.00535123	0.776605
GCST90274845	Thymic stromal lymphopoietin levels	Prostate cancer	-0.00532127	0.00964113	0.586819
GCST90274846	Tumor necrosis factor ligand superfamily member 12 levels	Prostate cancer	0.00281948	0.00395614	0.480284
GCST90274847	Urokinase-type plasminogen activator levels	Prostate cancer	0.00197469	0.00498804	0.694243
GCST90274848	Vascular endothelial growth factor A levels	Prostate cancer	-0.00812032	0.00627435	0.206554
GCST90274758	Eukaryotic translation initiation factor 4E-binding protein 1 levels	Bladder cancer	-0.0502162	0.0508545	0.340182
GCST90274759	Adenosine Deaminase levels	Bladder cancer	-0.00718614	0.0577797	0.912394
GCST90274760	Artemin levels	Bladder cancer	-0.0117874	0.0331626	0.724921
GCST90274761	Axin-1 levels	Bladder cancer	0.103382	0.0589784	0.110166
GCST90274762	beta-nerve growth factor levels	Bladder cancer	0.00653371	0.0420768	0.877676
GCST90274763	Caspase 8 levels	Bladder cancer	0.0139531	0.0484655	0.776906
GCST90274764	Eotaxin levels	Bladder cancer	0.00870214	0.0398147	0.828836
GCST90274765	C-C motif chemokine 19 levels	Bladder cancer	-0.0347402	0.0251447	0.176103
GCST90274766	C-C motif chemokine 20 levels	Bladder cancer	-0.0041325	0.0433584	0.924702
GCST90274767	C-C motif chemokine 23 levels	Bladder cancer	-0.0373768	0.0212617	0.088321
GCST90274768	C-C motif chemokine 25 levels	Bladder cancer	0.0166126	0.0343575	0.636201
GCST90274769	C-C motif chemokine 28 levels	Bladder cancer	-0.0282817	0.0283979	0.326766
GCST90274770	C-C motif chemokine 4 levels	Bladder cancer	-0.000662617	0.0245084	0.97863
GCST90274771	Natural killer cell receptor 2B4 levels	Bladder cancer	0.0127261	0.0288672	0.66259
GCST90274772	CD40L receptor levels	Bladder cancer	0.0150274	0.0271476	0.585012
GCST90274773	T-cell surface glycoprotein CD5 levels	Bladder cancer	0.0267143	0.0343603	0.443637
GCST90274774	T-cell surface glycoprotein CD6 isoform levels	Bladder cancer	-0.0103033	0.0450969	0.826868
GCST90274775	CUB domain-containing protein 1 levels	Bladder cancer	0.0125891	0.0249018	0.616868
GCST90274776	Macrophage colony-stimulating factor 1 levels	Bladder cancer	-0.00802071	0.0395748	0.840969
GCST90274777	Cystatin D levels	Bladder cancer	-0.0107843	0.026894	0.694478
GCST90274778	Fractalkine levels	Bladder cancer	0.0231238	0.0354367	0.518714
GCST90274779	C-X-C motif chemokine 1 levels	Bladder cancer	-0.00980403	0.0254775	0.703913
GCST90274780	C-X-C motif chemokine 10 levels	Bladder cancer	0.0179991	0.0242531	0.463776
GCST90274781	C-X-C motif chemokine 11 levels	Bladder cancer	-0.0416446	0.0314954	0.195179
GCST90274782	C-X-C motif chemokine 5 levels	Bladder cancer	0.0154504	0.0260284	0.559435
GCST90274783	C-X-C motif chemokine 6 levels	Bladder cancer	-0.00131318	0.0478939	0.979439
GCST90274784	C-X-C motif chemokine 9 levels	Bladder cancer	-0.00890037	0.0290702	0.761523
GCST90274785	Delta and Notch-like epidermal growth factor-related receptor levels	Bladder cancer	-0.0233179	0.0292536	0.433211
GCST90274786	Protein S100-A12 levels	Bladder cancer	0.0140523	0.0378987	0.71419
GCST90274787	Fibroblast growth factor 19 levels	Bladder cancer	-0.0888821	0.0393294	0.0312448
GCST90274788	Fibroblast growth factor 21 levels	Bladder cancer	0.014126	0.0317853	0.660722
GCST90274789	Fibroblast growth factor 23 levels	Bladder cancer	0.0174564	0.0364567	0.636064
GCST90274790	Fibroblast growth factor 5 levels	Bladder cancer	-0.0591408	0.0483331	0.275613
GCST90274791	Fms-related tyrosine kinase 3 ligand levels	Bladder cancer	0.032033	0.0229324	0.169627
GCST90274792	Glial cell line-derived neurotrophic factor levels	Bladder cancer	-0.00819772	0.0319247	0.799535
GCST90274793	Hepatocyte growth factor levels	Bladder cancer	-0.0283437	0.0376388	0.458188
GCST90274794	Interferon gamma levels	Bladder cancer	0.0535729	0.0355844	0.149538
GCST90274795	Interleukin-10 levels	Bladder cancer	-0.0382555	0.0328118	0.252839
GCST90274796	Interleukin-10 receptor subunit alpha levels	Bladder cancer	0.0514848	0.0396597	0.21062
GCST90274797	Interleukin-10 receptor subunit beta levels	Bladder cancer	-0.0145999	0.0213678	0.500721
GCST90274798	Interleukin-12 subunit beta levels	Bladder cancer	-0.0292878	0.0233837	0.226421
GCST90274799	Interleukin-13 levels	Bladder cancer	-0.0919034	0.0399119	0.0292369
GCST90274800	Interleukin-15 receptor subunit alpha levels	Bladder cancer	-0.0221966	0.0257277	0.39802
GCST90274801	Interleukin-17A levels	Bladder cancer	0.0150262	0.0525886	0.778176
GCST90274802	Interleukin-17C levels	Bladder cancer	0.0216129	0.0317842	0.501115
GCST90274803	Interleukin-18 levels	Bladder cancer	-0.0131195	0.0298862	0.664043
GCST90274804	interleukin-18 receptor 1 levels	Bladder cancer	0.0206151	0.08495	0.815216
GCST90274805	Interleukin-1-alpha levels	Bladder cancer	-0.0315858	0.0390817	0.428485
GCST90274806	Interleukin-2 levels	Bladder cancer	0.0356891	0.0474729	0.461902
GCST90274807	Interleukin-20 levels	Bladder cancer	0.0579856	0.0554824	0.307851
GCST90274808	Interleukin-20 receptor subunit alpha levels	Bladder cancer	-0.0726975	0.0460227	0.130703
GCST90274809	Interleukin-22 receptor subunit alpha-1 levels	Bladder cancer	-0.0338351	0.0490475	0.498632
GCST90274810	Interleukin-24 levels	Bladder cancer	-0.0195997	0.0463085	0.677754
GCST90274811	Interleukin-2 receptor subunit beta levels	Bladder cancer	-0.00059823	0.0376647	0.987485
GCST90274812	Interleukin-33 levels	Bladder cancer	0.012398	0.0440008	0.780756
GCST90274813	Interleukin-4 levels	Bladder cancer	0.0359583	0.041707	0.399349
GCST90274814	Interleukin-5 levels	Bladder cancer	-0.00518846	0.0427343	0.90464
GCST90274815	Interleukin-6 levels	Bladder cancer	-0.0582738	0.046864	0.239545
GCST90274816	Interleukin-7 levels	Bladder cancer	-0.0821294	0.0424863	0.0668234
GCST90274817	Interleukin-8 levels	Bladder cancer	0.056066	0.0318299	0.0894888
GCST90274818	Latency-associated peptide transforming growth factor beta 1 levels	Bladder cancer	-0.00528104	0.0272523	0.847652
GCST90274819	Leukemia inhibitory factor levels	Bladder cancer	0.047826	0.0318924	0.14532
GCST90274820	Leukemia inhibitory factor receptor levels	Bladder cancer	0.0197729	0.0255855	0.446598
GCST90274821	Monocyte chemoattractant protein-1 levels	Bladder cancer	-0.0285691	0.0300104	0.349556
GCST90274822	Monocyte chemoattractant protein 2 levels	Bladder cancer	0.00293585	0.0402767	0.944718
GCST90274823	Monocyte chemoattractant protein-3 levels	Bladder cancer	-0.0442523	0.042215	0.30496
GCST90274824	Monocyte chemoattractant protein-4 levels	Bladder cancer	-0.0235165	0.0278333	0.405588
GCST90274825	Macrophage inflammatory protein 1a levels	Bladder cancer	-0.00144642	0.0285992	0.960221
GCST90274826	Matrix metalloproteinase-1 levels	Bladder cancer	-0.00738223	0.0295159	0.804631
GCST90274827	Matrix metalloproteinase-10 levels	Bladder cancer	-0.0270354	0.026194	0.313756
GCST90274828	Neurturin levels	Bladder cancer	-0.0209889	0.034925	0.554291
GCST90274829	Neurotrophin-3 levels	Bladder cancer	0.0091216	0.0334307	0.78697
GCST90274830	Osteoprotegerin levels	Bladder cancer	-0.00893465	0.0466708	0.849562
GCST90274831	Oncostatin-M levels	Bladder cancer	-0.0804319	0.0389256	0.0513544
GCST90274832	Programmed cell death 1 ligand 1 levels	Bladder cancer	0.0129837	0.0304769	0.673353
GCST90274833	Stem cell factor levels	Bladder cancer	0.00415381	0.0227486	0.855953
GCST90274834	SIR2-like protein 2 levels	Bladder cancer	-0.00883308	0.0403861	0.829476
GCST90274835	Signaling lymphocytic activation molecule levels	Bladder cancer	0.0125117	0.0236935	0.600695
GCST90274836	Sulfotransferase 1A1 levels	Bladder cancer	0.100832	0.0327254	0.00448659
GCST90274837	STAM binding protein levels	Bladder cancer	0.0301813	0.0482071	0.538715
GCST90274838	Transforming growth factor-alpha levels	Bladder cancer	-0.0569849	0.0404955	0.17219
GCST90274839	Tumor necrosis factor levels	Bladder cancer	0.0253562	0.0314523	0.427184
GCST90274840	TNF-beta levels	Bladder cancer	0.00654096	0.0502895	0.900765
GCST90274841	Tumor necrosis factor receptor superfamily member 9 levels	Bladder cancer	0.0150128	0.0311116	0.632702
GCST90274842	Tumor necrosis factor ligand superfamily member 14 levels	Bladder cancer	0.00282887	0.0218844	0.89791
GCST90274843	TNF-related apoptosis-inducing ligand levels	Bladder cancer	0.0108177	0.0246185	0.663226
GCST90274844	TNF-related activation-induced cytokine levels	Bladder cancer	-0.00845724	0.0245089	0.73165
GCST90274845	Thymic stromal lymphopoietin levels	Bladder cancer	0.0434132	0.0414286	0.30606
GCST90274846	Tumor necrosis factor ligand superfamily member 12 levels	Bladder cancer	0.00220719	0.026908	0.935067
GCST90274847	Urokinase-type plasminogen activator levels	Bladder cancer	0.0311645	0.0275044	0.263461
GCST90274848	Vascular endothelial growth factor A levels	Bladder cancer	0.0341574	0.0237962	0.161515
